# Supplementary material for: Initiation of chromosome replication controls both division and replication cycles in E. coli through a double-adder mechanism
Source: eLife journal article supplement (doi:10.7554/elife.48063), 2019-11-11
Supplement: supp [file elife-48063-supp-v1.zip]

Archive with 28 entries (28 files):
- elife_poa_e48063_Figure_7_figure_supplement_1.pdf
- elife_poa_e48063_Appendix_2_figure_2.pdf
- elife_poa_e48063_Figure_3_source_data_1.csv
- elife_poa_e48063_Appendix_2_figure_1.pdf
- elife_poa_e48063_Figure_7_source_data_1.csv
- elife_poa_e48063_Transparent_Reporting_File.pdf
- elife_poa_e48063_Figure_5_source_data_3.csv
- elife_poa_e48063_Figure_1_figure_supplement_1.pdf
- elife_poa_e48063_Figure_2_source_data_1.csv
- elife_poa_e48063_Figure_7_figure_supplement_2.pdf
- elife_poa_e48063_Figure_4_figure_supplement_1.pdf
- elife_poa_e48063_Figure_6_figure_supplement_1.pdf
- elife_poa_e48063_Figure_7_source_data_2.csv
- elife_poa_e48063_Figure_5_figure_supplement_3.pdf
- elife_poa_e48063_Figure_1_source_data_1.csv
- elife_poa_e48063_Figure_5_figure_supplement_2.pdf
- elife_poa_e48063_Figure_5_source_data_1.csv
- elife_poa_e48063_Figure_5_figure_supplement_4.pdf
- elife_poa_e48063_Figure_7_figure_supplement_5.pdf
- elife_poa_e48063_Figure_7_figure_supplement_4.pdf
- elife_poa_e48063_Figure_5_figure_supplement_1.pdf
- elife_poa_e48063_Figure_7_source_data_4.csv
- elife_poa_e48063_Figure_7_figure_supplement_3.pdf
- elife_poa_e48063_Figure_7_source_data_6.csv
- elife_poa_e48063_Figure_5_source_data_2.csv
- elife_poa_e48063_Figure_7_source_data_5.csv
- elife_poa_e48063_Figure_7_source_data_3.csv
- elife_poa_e48063_Figure_6_source_data_1.csv
