# Supplementary material for: Initiation of chromosome replication controls both division and replication cycles in E. coli through a double-adder mechanism
Source: eLife journal article supplement (doi:10.7554/elife.48063), 2019-11-11
Supplement: supp [file elife-48063-supp-v1.zip › elife_poa_e48063_Figure_3_source_data_1.csv]

Lb	dL	Li	Li_prev	dLambda_if	lambda_inv	Tid	dLambda_ib	Lb_mother	condition
1.6026707025088152	1.9258753615954987				84.31437975885848				glycerol
1.381818268930374	2.277840860829004				74.72557632558387				glycerol
1.4429930180691104	1.8110837956350425				99.72860289200725			43.0424008728899	glycerol
2.057289175791611	2.093997440854142				100.70951357425447			24.656472346289462	glycerol
1.5992581853580548	1.8042729270178974				79.8436583750091			24.656472346289462	glycerol
1.7502797185209529	1.9515857168526005				72.17764913539247			21.25874259892883	glycerol
1.7606282600485819	2.0393914734419987				81.0871749990328			21.25874259892883	glycerol
1.6965618198453547	2.097580910593173	2.21862727438742			77.50870142906888	60.0	1.5755154560511078	24.60397208243161	glycerol
1.6192574980396834	1.564612159699101	1.804256235503466			76.88768090804295	63.0	1.3796134222353185	24.60397208243161	glycerol
1.7051121973468615	1.7754435034500056	1.8952365549794083			78.68271606313535	69.0	1.5853191458174587	26.927380284937737	glycerol
2.041344941354031	1.7701132496952758	2.200175723991026			83.25719325077598	66.0	1.611282467058281	31.65060270448632	glycerol
1.9609227801456806	1.3196149452729315	2.0644717586585974			80.81901041230714	54.0	1.2160659667600147	31.65060270448632	glycerol
1.6786944770494887	1.9417313316708398	2.325833855237416	1.0322358793292987	1.293597975908117	89.28412768705087	57.0	1.2945919534829127	30.168042771472006	glycerol
1.438112793989115	1.7813043813762743	1.9851195783118756	1.0322358793292987	0.9528836989825767	90.31304815325812	63.0	1.2342975970535137	30.168042771472006	glycerol
2.1620515845158264	1.3423051774961032	2.4395044631426424	1.100087861995513	1.3394166011471293	120.55996459965793	63.0	1.0648522988692872	31.40530679006202	glycerol
1.5327119485175325	1.7465909918766296	2.007572411215372	1.100087861995513	0.907484549219859	84.75328539960358	60.0	1.27173052917879	31.40530679006202	glycerol
1.812929952006226	2.133473574327109	2.3117981927646216	1.10931363719371	1.2024845555709114	85.54508225635628	66.0	1.6346053335687136	26.100951074543918	glycerol
1.8849804750334755	1.6920470914514525	2.411641735355675	1.2197522315713212	1.1918895037843535	126.59437819750701	72.0	1.165385831129253	33.26233206947425	glycerol
1.5039073104072427	1.7228072545903375	2.0671049168898508	1.2197522315713212	0.8473526853185294	98.06144242028833	63.0	1.1596096481077294	33.26233206947425	glycerol
1.9721099268052735	2.1341467530975753	2.4143338251586397	1.162916927618708	1.2514168975399318	82.2241079421143	63.0	1.6919228547442091	25.826068877684442	glycerol
1.3827370724684158	1.7978413506517548	1.581572272792369	1.003786205607686	0.577786067184683	77.38635135336989	78.0	1.5990061503278017	23.58018382334665	glycerol
1.603065290872588	1.6820060873535232	1.850418368438969	1.003786205607686	0.8466321628312831	72.45736022694616	60.0	1.4346530097871422	23.58018382334665	glycerol
1.601461825579226	1.7009759639875917	1.6485013719762267	0.9252091842194845	0.7232921877567422	71.82931222613762	72.0	1.6539364175905908	24.662542936501353	glycerol
1.4520190654545897	1.645172583221306	1.5327524395047862	0.7907861363961844	0.7419663031086018	76.85971265851451	78.0	1.5644392091711095	21.272878037975627	glycerol
1.6527702059437253	1.6981401133320524	1.903717671215832	0.7907861363961844	1.1129315348196474	73.55343030466398	60.0	1.4471926480599457	21.272878037975627	glycerol
1.5313540152770018	1.6854120053605643	1.9612075596311678	1.0335524584449254	0.9276551011862426	92.4539668816808	66.0	1.2555584610063983	23.13703554472681	glycerol
1.4852507271180024	1.781608967439483	1.8087662711440833	1.0335524584449254	0.775213812699158	84.41801689577053	72.0	1.4580934234134022	23.13703554472681	glycerol
1.8555795189159978	2.3279963270751365	2.295883150954082	1.2058208676778375	1.0900622832762445	107.42908228578787	93.0	1.8876926950370523	28.999699615899623	glycerol
1.6288662134069185	1.9921834186869607	1.9657147144278413	1.2058208676778375	0.7598938467500039	132.7502919626358	117.0	1.655334917666038	28.999699615899623	glycerol
1.4893578078679004	1.9755276445064462	2.0770771014270313	0.9806037798155839	1.096473321611447	81.27296346935339	60.0	1.3878083509473154	23.559292542723103	glycerol
1.3868217215425143	2.182040334915655	1.9510124562240225	0.9806037798155839	0.9704086764084386	79.19736108844373	69.0	1.617849600234147	23.559292542723103	glycerol
2.2263531128119975	1.323476167643857	1.9737789042713965	1.147941575477041	0.8258373287943555	98.05855750279463	75.0	1.576050376184458	28.547377214092272	glycerol
1.9933019193446175	1.6469373216785854	1.9359410115639013	1.147941575477041	0.7879994360868604	79.41321488891006	81.0	1.7042982294593017	28.547377214092272	glycerol
1.8856676483512715	1.932137440338587	2.0394068970828148	0.9828573572139206	1.0565495398688942	106.12498075841887	96.0	1.7783981916070437	25.059480206260282	glycerol
1.6799929764952397	2.1042484744881524	2.143427892017271	0.9828573572139206	1.1605705348033506	76.82137460067187	63.0	1.640813558966121	25.059480206260282	glycerol
1.8083257223191895	1.6675810462163698	2.222772502022579	0.9868894521356982	1.235883049886881	120.92477903353291	78.0	1.2531342665129803	34.25158635095381	glycerol
1.681049067803957	1.7556974865428612	2.228050404479696	0.9868894521356982	1.2411609523439977	95.95983624237131	60.0	1.208696149867122	34.25158635095381	glycerol
1.713226764581168	2.0066543783106745	2.145707848527927	0.9679705057819507	1.177737342745976	83.14406848799632	66.0	1.5741732943639155	30.666183374532576	glycerol
1.7490546190493004	1.554592118763248	1.9781514797720712	0.9679705057819507	1.0101809739901204	101.36415618523162	75.0	1.3254952580404773	30.666183374532576	glycerol
1.9451927029997798	1.7921363943629918	2.2054684288997386	1.0728539242639634	1.1326145046357754	82.7942398917113	63.0	1.531860668463033	26.357334839710276	glycerol
1.5571404080817866	1.7645091296306017	2.1083280578390564	1.114025202239848	0.9943028555992084	82.3421152689771	54.0	1.2133214798733318	25.862293350830104	glycerol
1.6874109195235685	2.0312169198598253	2.1073425131181334	1.114025202239848	0.9933173108782855	84.21355301179213	69.0	1.6112853262652602	25.862293350830104	glycerol
1.7699508609342145	1.806577513485834	2.215446964026616	1.1113862510112895	1.1040607130153264	138.93670930876036	96.0	1.3610814103934326	27.82039572798753	glycerol
1.6228794239816193	1.7975590462368882	2.07021478607072	1.1113862510112895	0.9588285350594304	136.66467101863068	99.0	1.3502236841477875	27.82039572798753	glycerol
1.7544848239034654	1.516677632614959	1.8288852153875366	1.0541640289195282	0.7747211864680082	100.13842006268258	84.0	1.4422772411308877	23.95600627818133	glycerol
1.6313348470643547	1.4782081938656682	1.6739760943679947	1.0541640289195282	0.6198120654484665	80.58886632153623	72.0	1.4355669465620282	23.95600627818133	glycerol
1.8071716657891588	1.6312027944423533	2.1638067066951328	1.0536712565590667	1.110135450136066	80.81956509496302	54.0	1.2745677535363793	25.960167992670282	glycerol
1.752791341615876	2.346774539293431	2.0946081604302464	1.107723482013308	0.9868846784169385	151.7355509489356	147.0	2.004957720479061	27.23001324514176	glycerol
1.5854007079927732	1.7842390719390622	1.8931489971807343	1.107723482013308	0.7854255151674264	140.6577278224284	117.0	1.4764907827511011	27.23001324514176	glycerol
1.6397254239015326	1.6133527644329637	1.9460409433053394	1.03510739303536	0.9109335502699792	109.27289304554405	81.0	1.307037245029157	24.967375753563374	glycerol
1.8283772356960937	1.9736612675363763	2.1956013126103118	1.03510739303536	1.1604939195749517	102.25245297294063	81.0	1.6064371906221582	24.967375753563374	glycerol
1.575108471149055	2.035483830890443	1.9496237473394509	0.9144426076937683	1.0351811396456827	87.73510522507117	78.0	1.660968554700047	26.992074213899468	glycerol
1.5119939311416144	1.7282389853606426	1.9048510081650765	0.9730204716526697	0.9318305365124069	90.02904069193129	69.0	1.3353819083371805	25.226544983100503	glycerol
1.844071823885123	1.5795516066834387	2.0770764317969745	1.0978006563051559	0.9792757754918189	87.38231045052439	63.0	1.3465469987715872	28.12888054917067	glycerol
1.6392741923952758	1.696795252579555	1.796672104995002	0.9465744985903671	0.8500976064046349	90.72355241862013	81.0	1.5393973399798289	24.39078012296574	glycerol
1.744468835259153	1.5392371269120464	1.8222506548660007	0.9465744985903671	0.8756761562756334	95.33858708637058	81.0	1.4614553073051988	24.39078012296574	glycerol
2.3682778317729447	1.5381692837020866	1.8369358242441751	1.0473040802151232	0.7896317440290519	99.72040276084076	96.0	2.069511291230856	26.966020640244245	glycerol
1.9640044345535255	1.6885423874909857	1.811933471152386	1.0473040802151232	0.7646293909372629	77.08596464221411	96.0	1.8406133508921252	26.966020640244245	glycerol
1.6062053476416758	1.8260415559632268	1.8085428156104235	0.898336052497501	0.9102067631129226	87.63145933168855	81.0	1.623704087994479	25.219602959927318	glycerol
1.73886778975139	1.7615542379786668	1.87422761259766	0.905966735576193	0.9682608770214669	83.21935043756923	75.0	1.6261944151323968	30.215452839285007	glycerol
1.7602615887894195	1.813610801805752	1.8399237548818057	0.905966735576193	0.9339570193056127	93.96120336345878	90.0	1.7339486357133658	30.215452839285007	glycerol
2.1044697198079754	1.5219653719619375	2.2464830625178145	0.9184679121220876	1.3280151503957267	95.52980684201556	66.0	1.3799520292520984	36.43504356573761	glycerol
1.75947634518505	1.954861532443975	1.8831427749449627	0.9184679121220876	0.9646748628228753	91.840232900985	90.0	1.8311951026840623	36.43504356573761	glycerol
1.8388224028819746	1.7922479498458335	2.28728963515878	1.1232415312589072	1.164048103899873	161.97833867108614	108.0	1.343780717569028	32.376457227815	glycerol
1.7029791660397937	1.7250167053590657	1.826385415402947	1.1232415312589072	0.70314388414404	89.17030716679807	81.0	1.6016104559959123	32.376457227815	glycerol
1.5805905141343497	1.5956668385680017	1.7347312929642085	0.93711380629883	0.7976174866653785	89.38643764132271	78.0	1.441526059738143	26.751812150021383	glycerol
1.607785419243215	1.7645898375430584	1.9206045784003831	0.93711380629883	0.9834907721015531	70.17936489018254	57.0	1.4517706783858904	26.751812150021383	glycerol
1.817868442764566	1.597050990725186	1.8624898410400321	0.9415713874724814	0.9209184535675509	85.75162582216264	75.0	1.5524295924497198	27.068866849000766	glycerol
1.7601011104814879	1.4118602192147087	1.8791383581541674	0.9415713874724814	0.937566970681686	95.32586959890926	72.0	1.2928229715420292	27.068866849000766	glycerol
1.5335645188292306	1.9724195644874094	2.095873333114559	0.9131927077014735	1.1826806254130853	113.16668543185946	84.0	1.4101107502020809	26.199679477535287	glycerol
1.610849138692254	2.064837207966354	2.318041210780455	0.9131927077014735	1.4048485030789812	85.70043848894845	57.0	1.3576451358781534	26.199679477535287	glycerol
1.6117814561115742	2.2652372378404664	2.43607414894474	0.9312449205200161	1.5048292284247242	80.55017020457419	54.0	1.4409445450073002	27.96720681176255	glycerol
1.398174563751501	2.403005411015568	1.8763483354173904	0.9312449205200161	0.9451034148973744	70.69083043400344	72.0	1.9248316393496787	27.96720681176255	glycerol
2.087590357747496	2.22188699775256	2.7481746862138463	1.14364481757939	1.6045298686344562	166.39981024721985	108.0	1.56130266928621	28.289575428953455	glycerol
1.524886259373877	2.0075514724687613	1.7765255695873572	1.14364481757939	0.6328807520079671	108.91426159369227	108.0	1.7559121622552811	28.289575428953455	glycerol
1.7713961172509127	2.3281901241621754	2.419208500671619	1.1590206053902274	1.2601878952813919	86.73446365517125	66.0	1.680377740741469	24.782294441419292	glycerol
1.6409654706894972	1.735300122536123	2.016621279763534	1.0479366665572796	0.9686846132062542	80.70067275955101	60.0	1.3596443134620864	23.59330028968047	glycerol
1.6895959983422648	1.6095599584964575	1.950107627173159	1.0479366665572796	0.9021709606158794	87.00888421709598	66.0	1.3490483296655633	23.59330028968047	glycerol
1.7300846120953295	1.6035878936889405	2.038361654703496	0.8882627847936786	1.1500988699098176	88.76961006471718	63.0	1.295310851080774	23.459788605751953	glycerol
1.7654785975349032	1.9430042832309051	2.166616927800942	0.8882627847936786	1.2783541430072636	81.24995851832006	63.0	1.5418659529648662	23.459788605751953	glycerol
1.5866361386884522	1.5623603122179173	2.1573804960836904	1.008310639881767	1.1490698562019235	87.97468767737548	48.0	0.9916159548226791	25.24562262599226	glycerol
2.4228712090414386	1.296350778391857	2.5109639458883826	1.3740873431069232	1.1368766027814594	116.4515012037677	66.0	1.2082580415449131	32.116774734576865	glycerol
1.915562161613757	1.4416282986981765	2.003505911631972	1.3740873431069232	0.6294185685250487	92.65132401363785	69.0	1.3536845486799618	32.116774734576865	glycerol
1.5378233872599925	1.8326126069327051	1.8711188203349565	1.019180827351748	0.8519379929832085	84.80225240433994	72.0	1.499317173857741	26.616686339928144	glycerol
1.625779010361939	2.1833638699282165	2.065656622775543	1.019180827351748	1.0464757954237949	78.15456003303908	69.0	1.7434862575146126	26.616686339928144	glycerol
2.060940613632119	1.9218026485166355	2.7054790166257328	1.2554819729441913	1.4499970436815415	145.19292289511802	81.0	1.2772642455230216	37.27494167756059	glycerol
1.6127372280531806	1.997647047915103	1.9368980041311825	1.2554819729441913	0.6814160311869911	113.53461558384089	102.0	1.673486271837101	37.27494167756059	glycerol
1.4965763228700273	1.9176939260279218	2.058230205426707	1.001752955815986	1.0564772496107213	110.93262906011248	81.0	1.3560400434712419	29.470187101750106	glycerol
1.5299438280828916	2.0750795293468176	1.8553584233813767	1.001752955815986	0.8536054675653908	97.04577131867967	93.0	1.7496649340483328	29.470187101750106	glycerol
1.6619465943054785	2.5100853910548966	1.9305874625378592	0.9684490020655913	0.9621384604722679	97.14761090487738	108.0	2.241444522822516	24.811341970048932	glycerol
1.5744853141549124	2.2662175376585267	1.8334042760284466	0.9684490020655913	0.8649552739628554	95.60897897258393	102.0	2.0072985757849926	24.811341970048932	glycerol
1.6964172764915015	1.7802826691456084	1.9896871867662822	1.0291151027133536	0.9605720840529285	78.24367252172223	63.0	1.4870127588708277	23.02425112107734	glycerol
1.7246929939552063	1.7149626684596515	1.9446949246930143	1.0291151027133536	0.9155798219796607	69.28235535261146	57.0	1.4949607377218435	23.02425112107734	glycerol
2.0638669106581222	1.5419770403148734	2.241721843907244	1.3527395083128664	0.8889823355943779	100.62274021501875	69.0	1.3641221070657514	31.70677867126337	glycerol
1.8880655379546851	1.4592817984919375	2.0692190094924405	1.3527395083128664	0.716479501179574	90.78700542672507	63.0	1.278128326954182	31.70677867126337	glycerol
1.6254014492055906	1.5099833285405921	1.7286630502362548	1.0346095047462203	0.6940535454900346	101.282231224341	87.0	1.406721727509928	29.04716212237977	glycerol
1.6473221955776358	1.7867052439431732	1.9250879008969135	1.0346095047462203	0.8904783961506932	93.415719325544	78.0	1.5089395386238955	29.04716212237977	glycerol
1.8067159825010124	1.5061434960232243	2.161160130925377	1.120860921953622	1.040299208971755	150.90762723839333	93.0	1.1516993475988597	31.751798625509572	glycerol
1.4936273610726558	1.5722139673657356	1.796061008515474	1.120860921953622	0.6752000865618518	112.77513100706938	87.0	1.2697803199229174	31.751798625509572	glycerol
2.200772557282919	1.3931806151735495	1.7577178227733952	0.9652937312689296	0.7924240915044657	76.31844822969849	78.0	1.8362353496830734	25.568409143161208	glycerol
1.4903949652473618	1.8512665956306913	1.783306781342191	0.8643315251181274	0.9189752562240636	92.7141351688837	84.0	1.558354779535862	25.00617614162447	glycerol
1.5102327864677922	2.5322564759102013	1.8580867892280708	0.8643315251181274	0.9937552641099434	80.25495740079806	90.0	2.184402473149923	25.00617614162447	glycerol
1.5779429878917133	1.974893881531299	1.6279774433422194	0.9625439504484568	0.6654334928937626	66.61392396935226	75.0	1.924859426080793	25.343418393502088	glycerol
1.5473911805254894	1.3618894886601796	1.763307897175343	0.898030504257737	0.8652773929176061	95.51784917950407	69.0	1.1459727720103259	22.97888247804086	glycerol
1.4192191961571816	1.8422102088383934	1.6931727916306942	0.898030504257737	0.7951422873729571	82.47203012303044	78.0	1.5682566133648808	22.97888247804086	glycerol
1.8688078550349543	1.939713820187845	2.1744535565235377	1.0805800654626885	1.0938734910608492	137.2780003651512	111.0	1.6340681186992616	27.795630500015573	glycerol
1.2394308560274805	2.1231314094830935	1.9112715396267435	1.0805800654626885	0.8306914741640548	110.42562398819337	90.0	1.4512907258838306	27.795630500015573	glycerol
1.435614857549786	1.7621359712662996	1.7932915819478747	0.8816539485876715	0.9116376333602032	93.47503020535045	78.0	1.4044592468682109	23.806018161930606	glycerol
1.4565050624180205	2.026751409500064	1.9311855285773587	0.8816539485876715	1.049531579989687	81.08585170978255	69.0	1.5520709433407258	23.806018161930606	glycerol
1.5364926133920005	1.9259608901443637	1.8075951667282764	0.8465863958153471	0.9610087709129292	76.78172855846104	72.0	1.6548583368080878	21.834141479341255	glycerol
2.177066171707631	2.128065072020985	2.608751368900216	1.0872267782617688	1.5215245906384471	149.44006322662665	108.0	1.6963798748284002	28.750890077460834	glycerol
1.506342881144786	2.3864934087665404	2.229662540457361	1.0872267782617688	1.142435762195592	100.74673230624344	81.0	1.6631737494539656	28.750890077460834	glycerol
1.5590939714946934	1.6867026707227795	1.6004623842554	0.9556357698133717	0.6448266144420282	79.4052375572521	81.0	1.6453342579620729	19.06816701580739	glycerol
1.7256024106933796	1.5658792194705695	1.8134845891655638	0.9556357698133717	0.8578488193521921	83.72359180545813	72.0	1.4779970409983854	19.06816701580739	glycerol
1.5166305805048224	1.9819022564732107	1.8432372676825641	0.8002311921277	1.0430060755548642	74.63427249096237	69.0	1.655295569295469	23.98606109991836	glycerol
1.4871930361367345	2.4152227289331827	2.0512695880311846	0.8002311921277	1.2510383959034845	64.66559827331886	60.0	1.8511461770387325	23.98606109991836	glycerol
2.0177379033437126	1.9140962914878337	2.1239862917979604	1.1148312702286804	1.0091550215692802	81.0420175881604	72.0	1.807847903033586	23.17450586376594	glycerol
1.850866590492083	2.0076890436350014	1.9470564380730526	1.1148312702286804	0.8322251678443722	82.08631352049863	81.0	1.911499196054032	23.17450586376594	glycerol
2.2844803812973673	1.732006121278853	2.378436923829344	1.304375684450108	1.0740612393792361	103.18548640204494	78.0	1.6380495787468763	33.49332571857894	glycerol
1.7882832162858993	1.6389447969553022	1.8218302986692607	1.304375684450108	0.5174546142191527	111.88460210406473	102.0	1.6053977145719407	33.49332571857894	glycerol
1.9405196099071416	1.9834934051259532	2.2471339088562883	1.0619931458989802	1.1851407629573079	70.87403732986087	57.0	1.6768791061768065	31.04212158990327	glycerol
2.2598851693946784	2.3930522748377747	3.0167735297161693	1.189218461914672	1.8275550678014971	100.778168352132	63.0	1.6361639145162838	35.1458520199595	glycerol
1.7208629212853892	1.9480110736256444	1.993778870771132	1.189218461914672	0.8045604088564599	98.88251987473905	87.0	1.6750951241399017	35.1458520199595	glycerol
1.7047966829936538	1.7335201477106226	2.095474528990799	0.9109151493346304	1.1845593796561686	100.78027648838403	72.0	1.3428423017134774	27.512049481321526	glycerol
1.56467970266782	2.0903466813632914	1.8893245808345323	0.9109151493346304	0.9784094314999018	88.23425177762255	84.0	1.765701803196579	27.512049481321526	glycerol
2.5679186919673738	1.9408801252279861	2.7246828747836958	1.5083867648580846	1.2162961099256113	140.36926212262108	102.0	1.7841159424116642	34.76746414453351	glycerol
2.0165342317921504	1.7930641902084075	2.235664975088233	1.5083867648580846	0.7272782102301484	120.94651676701496	93.0	1.5739334469123247	34.76746414453351	glycerol
1.567711965079784	1.90115760685088	1.7212553227097291	0.996889435385566	0.7243658873241632	89.02037693290474	90.0	1.7476142492209348	26.474814173621372	glycerol
1.652324660637275	1.9263545717636543	2.193606682220592	0.996889435385566	1.196717246835026	80.72255289388967	57.0	1.3850725501803374	26.474814173621372	glycerol
1.7085003687074714	1.693559589798299	2.0529683149077522	1.0477372644953995	1.0052310504123527	90.57259920905392	66.0	1.349091643598018	26.22764127682544	glycerol
1.6476242089086526	1.786577004698286	1.7994271681116913	0.8606276613548646	0.9387995067568268	70.78227254760152	66.0	1.6347740454952473	24.11864561661206	glycerol
1.9750667059674551	1.8616480074234572	2.0942419885824353	1.1178324875441166	0.9764095010383187	106.47513782956717	93.0	1.742472724808477	31.023603566033085	glycerol
1.7415466084027074	1.5604371804618977	1.8865359309616931	1.1178324875441166	0.7687034434175766	78.00954709316946	63.0	1.415447857902912	31.023603566033085	glycerol
2.806860117911624	1.5843460250471475	2.0323343056582925	1.3623414373918479	0.6699928682664448	185.8563057517407	141.0	2.358871837300479	39.50644141488267	glycerol
2.0691296757419853	1.7303000321973507	2.0626655798310627	1.3623414373918479	0.7003241424392145	82.12064493078925	90.0	1.7367641281082733	39.50644141488267	glycerol
1.778279765852568	1.8656960293529106	2.114501225862024	1.0313327899155313	1.0831684359464928	84.0554482298385	66.0	1.5294745693434546	31.832764242184385	glycerol
1.8270719400318842	1.7521322547628604	2.1750404792942097	1.0313327899155313	1.1437076893786786	83.49608095081891	60.0	1.4041637155005349	31.832764242184385	glycerol
1.8308019047520057	1.7042507122364892	1.922243307682073	1.0471209942912176	0.8751223133908556	85.32998557625515	75.0	1.6128093093064217	30.38564163026854	glycerol
2.4402450211852384	2.23584966634047	2.8313489912184506	1.0161671528291463	1.8151818383893044	111.90711651076813	81.0	1.8447456963072577	43.18246335248652	glycerol
1.742133005351742	1.4968767339696818	1.9643093267881035	1.0161671528291463	0.9481421739589572	103.94568502908413	75.0	1.2747004125333203	43.18246335248652	glycerol
1.6799931868109619	1.7166852564582018	2.108315285331557	1.057250612931012	1.0510646724005452	91.56523994912315	63.0	1.2883631579376065	27.35815024388566	glycerol
1.7784762274781605	2.3885304121530426	2.301979419481339	1.057250612931012	1.2447288065503272	80.59462824295949	69.0	1.8650272201498637	27.35815024388566	glycerol
1.559338397424849	1.6567473243626019	1.9337790493258848	0.9821546633940518	0.951624385931833	106.2839866625236	78.0	1.282306672461566	26.802046236180647	glycerol
2.694180797052688	2.4145328510509776	3.161534623688848	1.4156744956092253	1.745860128079623	90.99640370362023	63.0	1.9471790244148175	37.54223109515751	glycerol
1.7842334682845187	2.220603620287179	2.2795843841223897	1.4156744956092253	0.8639098885131645	84.87369432487341	69.0	1.725252704449308	37.54223109515751	glycerol
3.0191514855065495	1.7073351250110411	3.157550150087422	1.580767311844424	1.5767828382429978	139.18422095844272	81.0	1.5689364604301685	41.448935339272126	glycerol
1.8138116015664212	1.506694272375616	1.950318878908353	1.580767311844424	0.3695515670639289	85.97186350596866	66.0	1.3701869950336842	41.448935339272126	glycerol
1.8394821717780117	1.7126617397033486	2.077880547467452	1.1397921920611949	0.9380883554062572	85.31791058495162	66.0	1.474263364013908	27.44974566591567	glycerol
1.963962692835151	1.715923556536314	2.100637988951476	1.1397921920611949	0.9608457968902813	92.72611671902158	75.0	1.579248260419989	27.44974566591567	glycerol
1.6496862872779077	2.2695964493761798	1.9994642239516978	0.9751594394541765	1.0243047844975213	108.13859455556323	105.0	1.9198185127023897	27.904793870252632	glycerol
1.5823451266170239	2.1094279932759976	2.1740843254065987	0.9751594394541765	1.1989248859524222	78.54369565016438	60.0	1.5176887944864226	27.904793870252632	glycerol
2.8523930255175953	2.065007565135301	2.9064673090935353	1.578775075043711	1.3276922340498245	110.72602973966723	84.0	2.010933281559361	46.44848439240845	glycerol
1.6979006403538344	1.5816766178728867	1.9653814313554652	1.578775075043711	0.3866063563117543	85.28489877142003	63.0	1.314195826871256	46.44848439240845	glycerol
1.8593486778843724	1.925629435582485	1.6915722775176043	1.038940273733726	0.6526320037838782	67.28506398261808	75.0	2.093405835949253	28.299725719661716	glycerol
1.3455482574103075	1.878837920341742	1.732879524616526	0.9826907156777326	0.7501888089387934	90.41660096763322	81.0	1.4915066531355234	26.12154831313591	glycerol
1.5813675302492445	2.260522698314725	2.1056761126932124	0.9826907156777326	1.1229853970154795	72.61973640414672	63.0	1.7362141158707574	26.12154831313591	glycerol
3.007420275547243	1.9294357070624293	3.3896319844716225	1.4532336545467677	1.9363983299248546	121.66707956970032	66.0	1.5472239981380498	43.88296962334762	glycerol
1.882746110601482	2.057455450730016	2.3891970968023815	1.4532336545467677	0.9359634422556137	87.28862103540091	63.0	1.5510044645291163	43.88296962334762	glycerol
2.9228727749283485	2.5812645319373453	3.3955717782557677	1.6948159922358113	1.7007557860199565	124.84539070231733	87.0	2.108565528609926	46.26800423918835	glycerol
1.8825359437938352	1.6886399272207024	2.347625299135704	1.6948159922358113	0.6528093068998929	94.18420403273227	57.0	1.2235505718788335	46.26800423918835	glycerol
2.020499160924224	1.7606345336728415	2.249651524684212	1.1945985484011907	1.0550529762830216	116.13668219183003	87.0	1.5314821699128536	28.965324778484337	glycerol
1.6650260808257036	2.047759478183551	1.9639277411441243	1.1945985484011907	0.7693291927429337	88.16229211710113	81.0	1.7488578178651304	28.965324778484337	glycerol
1.6788314220740024	1.8688166279550902	1.8189526178485405	1.173812649567852	0.6451399682806883	77.82061363475698	75.0	1.728695432180552	28.96209144298208	glycerol
1.7357089784262005	1.5752230008046542	2.1067786789495884	1.173812649567852	0.9329660293817361	96.59634238255926	63.0	1.2041533002812663	28.96209144298208	glycerol
3.0887158491848	1.7964417807128874	3.181435759223821	1.6977858891278839	1.4836498700959375	140.61125916434113	87.0	1.7037218706738662	44.96727346043613	glycerol
2.1401955486016195	2.055268509398112	2.706609467601925	1.6977858891278839	1.0088235784740411	95.7688918221847	96.0	1.4888545903978065	44.96727346043613	glycerol
1.6478091310371388	1.6984993635768404	1.7881585707837293	0.9094763089242702	0.8786822618594592	76.31934791308291	69.0	1.5581499238302499	25.82817572421542	glycerol
1.7810870348100232	1.8733856132567421	1.7810870348100232	0.9094763089242702	0.871610725885753	63.650947850262135	66.0	1.8733856132567421	25.82817572421542	glycerol
2.8396185130302594	1.9526368152178182	3.2522538044895293	1.5907178796119106	1.6615359248776187	107.28368097450235	60.0	1.5400015237585483	47.518705372073846	glycerol
1.8497316268645267	1.542998686308759	2.061349771768291	1.5907178796119106	0.47063189215638	95.98565298830306	69.0	1.3313805414049948	47.518705372073846	glycerol
2.1755384022736637	1.3749777061266886	1.763237850133566	1.3533047338009625	0.40993311633260343	80.66156420279626	81.0	1.7872782582667863	32.92608536310184	glycerol
2.00537790457864	1.8839382422168538	1.923226589086696	1.3533047338009625	0.5699218552857334	72.20274188850559	81.0	1.966089557708798	32.92608536310184	glycerol
2.0527399498793732	2.277756594160169				83.56688848141188				glycerol
1.8508880031772825	2.5755849189043536				59.62128580840765				glycerol
1.5495085484869995	2.6092245018443556	2.567811702436031			90.56868496418818	63.0	1.590921347895324	28.47520004888127	glycerol
1.9371876568104582	1.4780357600899925	1.9877637121443548	1.4201231543349913	0.5676405578093634	80.68299434933655	63.0	1.427459704756096	37.72930957659202	glycerol
1.9889141212812036	2.212583657384877	2.2843464825470003	1.3101114030194372	0.9742350795275629	75.0748845868045	66.0	1.9171512961190804	32.01625313322024	glycerol
2.0521900531476325	2.5066061000800604	2.855300066602449	1.3101114030194372	1.5451886635830119	75.5543766252886	51.0	1.7034960866252438	32.01625313322024	glycerol
1.8866844956141033	2.2118097583175196	2.346710145075913	1.7890475982866725	0.5576625467892402	85.77242796772912	69.0	1.75178410885571	55.04761821760655	glycerol
1.760259252912824	2.174545950076387	2.301576968140362	1.7890475982866725	0.5125293698536895	85.30774158833727	66.0	1.6332282348488492	55.04761821760655	glycerol
1.6159945016010675	1.5836461803858106	1.880895290508574	0.9938818560721774	0.8870134344363967	82.19281409566673	63.0	1.318745391478304	29.802887027853203	glycerol
1.6831099150931368	1.4602393047448552	2.0047993907687722	0.9938818560721774	1.0109175346965948	83.22484817307665	54.0	1.1385498290692198	29.802887027853203	glycerol
1.9303582690594718	1.8795879652567493	2.1726567790020743	1.1421732412735002	1.0304835377285744	70.34341816588207	57.0	1.6372894553141468	30.598678788941594	glycerol
1.503738907133839	1.8158695591360816	1.9259530462420948	0.940447645254287	0.9855054009878079	84.02927392162164	66.0	1.3936554200278257	24.861453870785652	glycerol
1.9378857497050839	2.0069236284085363	2.0806448432735043	1.1733550725379565	0.9072897707355482	87.7644575745517	81.0	1.864164534840116	29.02591531714005	glycerol
1.7489340166533758	2.0095336744033796	2.2001112602088146	1.1733550725379565	1.0267561876708582	81.54620732171182	63.0	1.5583564308479407	29.02591531714005	glycerol
1.8510301902365456	1.9180944564999434	2.0032152282736195	1.150788484070181	0.8524267442034387	78.95498067435662	72.0	1.7659094184628694	27.080911583274215	glycerol
1.9033500975992703	1.680641808141124	2.131075026267501	1.150788484070181	0.9802865421973201	92.00171811924609	69.0	1.4529168794728933	27.080911583274215	glycerol
1.854522404625846	1.7715159105270102	1.9610956505241248	1.0016076141368098	0.959488036387315	74.43041563173453	66.0	1.6649426646287313	28.4773875421007	glycerol
1.731250260449431	1.8582477013579948	2.5175387148583304	1.0403224216367521	1.4772162932215782	105.51653865605347	54.0	1.0719592469490955	29.81362691853975	glycerol
1.765562210211174	2.0221781253130287	2.3258962449819136	1.0403224216367521	1.2855738233451612	98.07395680786632	69.0	1.4618440905422894	29.81362691853975	glycerol
1.7782607771774526	1.6677513859598676	1.948166097504211	1.1000556301044073	0.8481104673998037	91.15093264898206	75.0	1.4978460656331092	26.906677179282703	glycerol
1.8192994403015006	1.8157423600654194	2.1769019753660337	1.1000556301044073	1.0768463452616266	81.11445760555719	60.0	1.4581398250008863	26.906677179282703	glycerol
1.6967172391876084	1.831689417270268	2.500034988197143	0.9740830487521055	1.5259519394450376	96.5661560710286	48.0	1.0283716682607333	27.357858110422345	glycerol
1.8958800685880324	1.697053965298266	2.4094907001260606	1.1629481224909568	1.246542577635104	104.08820024248419	60.0	1.1834433337602377	27.16249554171037	glycerol
1.7777089740787582	1.5623235755325502	2.142956066791895	1.1629481224909568	0.9800079443009382	89.02634849375195	57.0	1.1970764828194134	27.16249554171037	glycerol
1.990711614166131	1.9644548798467523	2.8307992919086167	1.2587693574291652	1.5720299344794515	118.12762414832648	57.0	1.1243672021042665	26.634619391529707	glycerol
1.442271971295262	2.502598546882056	2.29907257378002	1.2587693574291652	1.0403032163508548	84.7320606624201	66.0	1.6457979443972977	26.634619391529707	glycerol
1.6821574879919867	2.038054525255803	2.5543961557292896	1.2047453500630303	1.3496508056662593	99.55705308014703	54.0	1.1658158575185005	29.167385670585112	glycerol
1.7567340343200344	2.5034835888076996	2.9556708623735606	1.4153996459543083	1.540271216419252	147.8836972083291	78.0	1.3045467607541736	30.626332525632783	glycerol
1.950835628579176	1.9271938049545452	2.517974959809947	1.4153996459543083	1.1025753138556385	105.92883409361238	66.0	1.3600544737237743	30.626332525632783	glycerol
1.7485241797231768	1.8481966990542793	2.0577951883468852	1.14953628689001	0.9082589014568754	89.3762869159221	72.0	1.5389256904305708	22.188799558388645	glycerol
2.1309206884271186	2.0884974438567445	2.7119378797086604	1.14953628689001	1.5624015928186503	103.49370774069577	66.0	1.5074802525752027	22.188799558388645	glycerol
1.7547364320163499	2.0599281399773774	2.3227079999824283	1.0288975941734426	1.2938104058089854	96.40258954177007	69.0	1.4919565720112993	26.900371995741178	glycerol
1.9121357302586193	1.9535094673970843	2.2534580652491565	1.2589874799049734	0.9944705853441832	88.62417234297655	69.0	1.612187132406547	30.012855824295013	glycerol
1.8802327792395281	1.8307038827349487	2.3281521911150045	1.2589874799049734	1.069164711210031	107.04759637303184	72.0	1.3827844708594723	30.012855824295013	glycerol
2.301499799506203	2.1790856353802965	2.5402340302144917	1.4778354311867803	1.0623985990277114	84.27729708685922	69.0	1.940351404672008	27.02667745107745	glycerol
1.788013385225372	1.6377314774285554	2.1146773826020775	1.4778354311867803	0.6368419514152974	99.14076173970773	69.0	1.3110674800518498	27.02667745107745	glycerol
1.8373762214402773	2.000328013872382	2.084651839674687	1.1267290326245782	0.9579228070501089	98.8145578077398	87.0	1.7530523956379724	29.417472773209525	glycerol
1.7937216359178942	2.084851657261801	2.2606333667410263	1.1267290326245782	1.133904334116448	80.89378313073696	63.0	1.6179399264386687	29.417472773209525	glycerol
2.3806046736033233	1.6774514933189915	2.7981978905739684	1.2701170151072458	1.5280808754667228	128.6615302878804	69.0	1.2598582763483464	35.407689223172355	glycerol
1.7600042206544853	1.711039153300618	1.9507541853745103	1.2701170151072458	0.6806371702672643	101.04200800322948	84.0	1.520289188580593	35.407689223172355	glycerol
1.3581936232787042	2.0123968122589995	2.075753086552119	1.0573386913010387	1.01841439525108	102.95031423418266	72.0	1.2948373489855847	27.50789823423649	glycerol
1.9272019849604731	1.5373523224839738	2.056977171916558	1.0423259198373436	1.0146512520792148	95.72635182674028	72.0	1.4075771355278888	28.267326483696575	glycerol
2.2180427433893737	1.7177765620665806	2.5883674957076543	1.3990989452869842	1.18926855042067	94.27385214170388	57.0	1.3474518097483	36.624687286204974	glycerol
1.7454361342475557	1.5464277093047991	1.9243958377319834	1.3990989452869842	0.5252968924449991	85.21636969591255	66.0	1.3674680058203714	36.624687286204974	glycerol
1.6746315074544682	1.445121860353573	1.8874740506790122	0.9753770926872551	0.9120969579917572	86.8995277458315	63.0	1.232279317129029	27.076988010069	glycerol
1.6904812342898246	1.6718285058016216	2.0203762909713237	0.9753770926872551	1.0449991982840685	81.65169217918928	60.0	1.3419334491201225	27.076988010069	glycerol
1.9459699187592416	1.9046967932748797	2.334404283083584	1.2941837478538272	1.0402205352297569	91.40592832048881	66.0	1.5162624289505375	34.12373451368267	glycerol
1.7180288164815918	1.8475792689278567	1.932751928360254	1.2941837478538272	0.6385681805064268	88.28606257843205	78.0	1.6328561570491946	34.12373451368267	glycerol
1.5002828427369432	2.2296928537562146	2.3655905269666735	0.9621979188659917	1.4033926081006818	86.76249947908244	57.0	1.3643851695264844	26.852863603808547	glycerol
1.4213088797457147	1.7732255342666319	1.833279822188163	0.9621979188659917	0.8710819033221714	89.86759431191827	72.0	1.3612545918241836	26.852863603808547	glycerol
2.1892658981296376	1.9336988210732389	2.5762614768953416	1.167202141541792	1.4090593353535494	114.97589154354006	78.0	1.5467032423075349	29.937998750142178	glycerol
1.6750081973555484	1.4491043655750087	2.149318769902947	1.167202141541792	0.9821166283611549	100.08025555447799	54.0	0.9747937930276103	29.937998750142178	glycerol
1.710096233052387	1.8306612086823126	1.9780427597295775	0.966375964180127	1.0116667955494507	85.71587733773342	72.0	1.562714682005122	26.431212561255258	glycerol
1.6552337267716835	1.7072069611928613	2.0473774635596054	0.966375964180127	1.0810014993794785	88.02180907390405	63.0	1.3150632244049394	26.431212561255258	glycerol
1.4974183081634949	1.8652307277200975	2.069562278343248	1.0746593849514734	0.9949028933917746	77.11283302040935	54.0	1.2930867575403444	25.76935688239305	glycerol
1.4963763152786678	2.2865732903436817	2.349592711143095	1.0746593849514734	1.2749333261916218	82.95725288074796	57.0	1.4333568944792545	25.76935688239305	glycerol
1.7067071471537165	1.5650734430207982	1.7943179611397146	0.9890213798647888	0.8052965812749259	83.07943741556919	72.0	1.4774626290348	26.309172816190568	glycerol
2.1378427666557527	1.9278609983548605	2.279773797613954	1.2881307384476708	0.9916430591662834	97.05080384967366	81.0	1.785929967396659	33.68101381737904	glycerol
1.8542083130828153	1.8182671137835842	1.9950719561892314	1.2881307384476708	0.7069412177415606	85.19706102759588	75.0	1.677403470677168	33.68101381737904	glycerol
1.506477184824295	1.9491432451933328	1.986782763157396	1.034781139171624	0.952001623985772	75.1398895126891	60.0	1.4688376668602319	23.037204740976843	glycerol
1.7044201201144256	1.5006108893795458	1.8332492976552006	0.9975359780946157	0.8357133195605848	85.61480995233232	69.0	1.3717817118387707	28.52628173973562	glycerol
1.7772018072225466	1.7445850174053625	1.8912073139110155	0.9975359780946157	0.8936713358163997	66.8896272739961	60.0	1.6305795107168937	28.52628173973562	glycerol
2.117139721247522	2.090489468740995	2.5297839357518397	1.139886898806977	1.3898970369448627	81.74460467056211	60.0	1.6778452542366775	32.889888717780806	glycerol
1.804223594545038	1.8994238068490805	2.1168938730192606	1.139886898806977	0.9770069742122838	104.08950153154038	84.0	1.586753528374858	32.889888717780806	glycerol
1.6172262187696866	1.5745182015022336	1.8952397283724958	0.9166246488276003	0.9786150795448956	91.75961599209224	69.0	1.2965046918994245	26.221848001760392	glycerol
2.3428923823733494	1.7923727456169263	2.7690204896964676	1.2648919678759198	1.504128521820548	124.4374175635071	72.0	1.366244638293808	32.571380326884956	glycerol
1.774888871855453	1.7441376806227717	2.117781739701079	1.2648919678759198	0.8528897718251592	94.18220313184648	69.0	1.4012448127771457	32.571380326884956	glycerol
1.893791692791673	1.7752371505748081	2.2097846621805637	1.0584469365096303	1.1513377256709334	94.32769864175222	69.0	1.4592441811859174	27.757286069923662	glycerol
1.7666524743473049	1.9721300354605849	2.1308157346618324	1.0584469365096303	1.072368798152202	77.6662920673103	63.0	1.6079667751460573	27.757286069923662	glycerol
1.6810726614232907	1.5150016436677367	2.0335841779496415	1.0588908698505395	0.9746933080991019	87.3862891240903	57.0	1.1624901271413859	27.305982643930044	glycerol
1.7298713623899304	2.660165258165115	2.3595648633904305	1.0588908698505395	1.300673993539891	73.68438676541123	66.0	2.0304717571646154	27.305982643930044	glycerol
2.3013745981717593	1.7161021276368178	2.6917843756386555	1.3845102448482338	1.3072741307904214	119.4336109193224	69.0	1.3256923501699216	36.04449819035922	glycerol
1.6843036330305738	2.0102975479545258	2.2411653800226228	1.3845102448482338	0.856655135174389	87.35810048831328	63.0	1.453435800962477	36.04449819035922	glycerol
1.5963631277771808	2.1165757353663484	2.2260986082421153	1.0167920889748208	1.2093065192672943	81.29595950976731	60.0	1.4868402549014141	25.862656329589086	glycerol
2.1903912998511106	2.323483292927754	2.726978036746598	1.3458921878193277	1.3810858489272702	94.90233398856094	69.0	1.7868965560322665	35.405763048796295	glycerol
1.666891365042624	1.6006859754046954	2.1165729630233288	1.3458921878193277	0.770680775204001	95.77150280267456	60.0	1.1510043774239906	35.405763048796295	glycerol
1.7522026916339009	1.5360390040026743	2.1907354336945266	1.1205826900113114	1.070152743683215	102.40636543330643	60.0	1.0975062619420486	25.91236358508575	glycerol
1.7331219382350422	2.1176232605098626	2.015691084158305	1.1205826900113114	0.8951083941469936	96.37386796624985	90.0	1.8350541145865997	25.91236358508575	glycerol
1.5008279602661594	1.4342761906946195	1.9457603066527975	1.0582864815116644	0.8874738251411333	96.1088237398537	57.0	0.9893438443079814	25.64448253911729	glycerol
1.5649613822681006	2.0609205302391276	2.327138605212846	1.0582864815116644	1.2688521237011818	89.09384996692236	57.0	1.298743307294382	25.64448253911729	glycerol
2.3375570613335377	1.5256594541096078	2.3375570613335377	1.363489018373299	0.9740680429602386	107.61575244555235	78.0	1.5256594541096078	33.69832769001709	glycerol
1.9476388044632216	1.6185094584146962	2.208022527394494	1.363489018373299	0.8445335090211951	89.38388366409751	81.0	1.3581257354834237	33.69832769001709	glycerol
2.0047250962523897	2.2737975715883803	2.683398765534811	1.1687785306667688	1.5146202348680422	106.97550536947662	72.0	1.595123902305959	35.96241632820827	glycerol
1.669868837223306	2.012503655500724	2.2523436712598692	1.1687785306667688	1.0835651405931006	97.29154514280245	69.0	1.4300288214641608	35.96241632820827	glycerol
1.5401349121114665	2.358248526861375	2.1745304166710278	1.104011263697247	1.0705191529737808	78.36877904597287	66.0	1.7238530223018138	29.96367391481879	glycerol
1.6598951536513145	2.618464334020179	2.4997432821364334	1.104011263697247	1.3957320184391864	81.26119767601156	63.0	1.77861620553506	29.96367391481879	glycerol
1.9036755654149933	1.748871400198242	2.0523296207950703	1.0872652083355139	0.9650644124595564	82.96855569591901	69.0	1.600217344818165	23.69438326325333	glycerol
1.688187762204489	2.0567021991296612	2.1440072110799053	1.1261718356299346	1.0178353754499707	104.3979410546257	84.0	1.6008827502542449	25.690289803435476	glycerol
1.8273890943850983	1.8473819628233306	2.2310871309349616	1.1261718356299346	1.104915295305027	83.34403903479166	60.0	1.4436839262734673	25.690289803435476	glycerol
2.3152453454074866	2.8051505264997036	3.2175411729107664	1.3416993827674055	1.8758417901433608	107.41511234783516	72.0	1.902854698996424	30.84192455772907	glycerol
1.8203182394266433	1.9203626421513298	2.2827425896471714	1.3416993827674055	0.9410432068797661	101.04799269372992	72.0	1.4579382919308017	30.84192455772907	glycerol
1.8125232895080297	1.9196917816115349	2.15937453442533	1.1413712948235857	1.0180032396017442	95.0066252825161	75.0	1.5728405366942346	28.004895991179126	glycerol
1.7377840859822469	2.0502318876286756	2.072107719846991	1.1413712948235857	0.9307364250234053	82.72596674499187	72.0	1.7159082537639319	28.004895991179126	glycerol
3.116657347760427	1.4797124913497437	3.116657347760427	1.6087705864553832	1.507886761305044	101.69576146358388	57.0	1.4797124913497437	35.619159160115174	glycerol
1.993060982644745	1.4985846956977755	1.993060982644745	1.6087705864553832	0.3842903961893617	74.1728510328482	60.0	1.4985846956977755	35.619159160115174	glycerol
2.8001461258972444	1.6407512133325302	2.909856231434828	1.5583286738802136	1.3515275575546146	108.2138677606898	66.0	1.5310411077949464	47.948574580929645	glycerol
1.7998138743972019	1.8143105816262006	1.9882969185512058	1.5583286738802136	0.4299682446709923	83.51573667057802	72.0	1.6258275374721967	47.948574580929645	glycerol
1.6094928653994787	1.55241473009331	1.7259424460058232	0.9965304913223725	0.7294119546834509	89.30505042771247	78.0	1.4359651494869654	30.662476656072997	glycerol
1.6337318527494045	2.0428472317209185	2.1996010903502734	0.9965304913223725	1.2030705990279011	76.91040266360444	57.0	1.4769779941200496	30.662476656072997	glycerol
2.554637507385516	2.132080644344757	2.987717227998772	1.454928115717414	1.5327891122813577	106.22993519757878	69.0	1.699000923731501	43.07917116764991	glycerol
1.7223971925883232	2.053547087291566	2.23750526002253	1.454928115717414	0.7825771443051158	79.4758407606433	60.0	1.5384390198573592	43.07917116764991	glycerol
1.6948592599792784	1.7007402942392191	2.1866906294227277	0.9941484592756029	1.1925421701471248	89.77548472146165	57.0	1.2089089247957698	27.689444221495414	glycerol
1.607063054840293	2.045421485084372	2.243280475648633	0.9941484592756029	1.2491320163730302	81.050164916185	57.0	1.4092040642760324	27.689444221495414	glycerol
1.8331949037364221	2.0153947043862157	2.1795340871273146	1.118752630011265	1.0607814571160497	84.11453474261222	69.0	1.669055520995323	26.498418347512665	glycerol
1.7183955938069575	1.5834697006495544	1.9250906531439909	1.118752630011265	0.806338023132726	73.23137746662856	57.0	1.376774641312521	26.498418347512665	glycerol
2.58286170059521	1.6733989881319133	2.9598048668423083	1.493858613999386	1.4659462528429226	137.38243883492183	72.0	1.2964558218848152	39.302115498238706	glycerol
1.905141089669042	1.4446727745544505	2.2177565163713737	1.493858613999386	0.7238979023719878	95.80154763365672	57.0	1.1320573478521188	39.302115498238706	glycerol
1.552545923286256	1.5678717838673066	1.7937789637794173	1.1088782581856869	0.6849007055937305	86.38637839005466	69.0	1.3266387433741453	29.30986291798526	glycerol
1.7117275754142778	1.7929312050257264	2.047563694713159	1.1088782581856869	0.9386854365274719	81.25198668416729	63.0	1.4570950857268454	29.30986291798526	glycerol
1.915670822005875	1.8390243421591719	1.9658999660759542	1.0897670435636573	0.8761329225122968	80.34229068606632	75.0	1.7887951980890926	28.20299851902188	glycerol
2.4915329018791086	1.7177953763205371	2.655047058623203	1.4799024334211541	1.1751446252020488	130.85607335346467	87.0	1.5542812195764428	39.736333855310924	glycerol
1.5105282325966596	1.5530075679851838	1.6994609859284378	1.4799024334211541	0.21955855250728343	88.2227905505463	75.0	1.3640748146534056	39.736333855310924	glycerol
1.557962847912709	2.316554467173656	1.7923711486557772	1.0237818473565794	0.7685893012991979	59.3446632256133	66.0	2.0821461664305883	26.334270390988888	glycerol
1.357674846549173	1.9983482460356916	2.1345697780210036	0.8968894818897086	1.2376802961312947	82.71966086163874	54.0	1.221453314563861	23.88532189671163	glycerol
1.4569575941436401	1.909629625359087	1.9261697781943277	0.8497304929642189	1.076439285230109	89.3797082137715	72.0	1.4404174413083994	23.238895886102455	glycerol
1.5375337482634892	2.610065751193841	2.224264291470934	0.8497304929642189	1.374533798506715	90.10528610187427	81.0	1.9233352079863963	23.238895886102455	glycerol
2.48415032114296	2.710119682853298	2.8241667330615723	1.3275235293116014	1.4966432037499708	129.67870767415417	114.0	2.3701032709346856	38.33127541352474	glycerol
1.666671059346449	1.9039073549186014	2.202453402239432	1.3275235293116014	0.8749298729278305	111.90074367318516	78.0	1.3681250120256183	38.33127541352474	glycerol
1.5834428457042964	1.7063141304082199	1.9010465364149052	0.9630848890971638	0.9379616473177413	79.62717664562896	63.0	1.388710439697611	22.414732217594462	glycerol
1.808816848278873	1.9081614091815526	2.1782914903839887	1.101226701119716	1.0770647892642726	89.50191486899648	69.0	1.5386867670764368	25.641093220714602	glycerol
1.5751428581900075	1.9742173651297632	2.0303895236976546	1.101226701119716	0.9291628225779384	81.9059291215187	66.0	1.5189706996221162	25.641093220714602	glycerol
2.9467493893557077	1.4982208346697452	2.4357813170332556	1.4120833665307861	1.0236979505024695	101.17201281501806	72.0	2.0091889069921973	38.217697248353225	glycerol
2.131440106470237	1.3363512200063021	2.3589035276577137	1.4120833665307861	0.9468201611269275	93.99184592740727	84.0	1.1088877988188255	38.217697248353225	glycerol
2.56934197788791	1.8234421493221928	2.894552671093292	1.2178906585166278	1.6766620125766645	139.58237084607896	84.0	1.4982314561168106	45.33460599008781	glycerol
1.5908627983706027	1.9181906543637022	1.9094802476605486	1.2178906585166278	0.6915895891439209	102.51714586609484	90.0	1.5995732050737563	45.33460599008781	glycerol
1.620691690391181	2.0229145589777278	2.1482084316699894	1.1794517638288569	0.9687566678411328	118.07411944871151	90.0	1.4953978176989193	32.79138625338826	glycerol
1.6691951223032067	1.7256866161726927	2.114850252015016	1.1794517638288569	0.9353984881861591	87.87271502888686	60.0	1.2800314864608833	32.79138625338826	glycerol
1.8695428467361765	1.5373542167021725	1.8695428467361765	1.0891457451919944	0.7803971015441821	72.76735692929748	63.0	1.5373542167021725	27.827951511982658	glycerol
2.530291155477414	2.338471699971577	3.2004296530804117	1.447276335546646	1.7531533175337655	123.90762324567325	75.0	1.6683332023685793	39.528338121352455	glycerol
1.6804350762384608	1.588570168759756	2.097746625827532	1.447276335546646	0.6504702902808859	103.12318602136531	66.0	1.1712586191706849	39.528338121352455	glycerol
1.579785241690133	1.603639508781825	1.7460994923673494	0.9547401238302743	0.7913593685370751	103.87285357661736	90.0	1.4373252581046085	24.474812282624658	glycerol
1.9171533211056564	1.7217206390510007	2.00694811001196	0.9547401238302743	1.0522079861816858	90.85733343647796	78.0	1.6319258501446972	24.474812282624658	glycerol
1.877862878542212	1.400779348522404	1.7587513394381895	1.0741042158349947	0.6846471236031947	70.89492641002124	63.0	1.5198908876264265	24.933718313710475	glycerol
1.4456147763324212	2.0221975819319535	2.0815515308095116	1.048873312913766	1.0326782178957457	85.55521553483177	63.0	1.3862608274548633	25.85284732674555	glycerol
1.558151039048064	1.7862227844322192	2.1763593507275676	1.048873312913766	1.1274860378138014	87.12216205709538	54.0	1.1680144727527155	25.85284732674555	glycerol
3.0211416041376644	2.2093995134553683	3.2505323065091627	1.6002148265402059	1.6503174799689568	113.65553587853636	78.0	1.98000881108387	38.927556238114065	glycerol
1.7317516372382236	1.5961781619961823	1.9823475097894672	1.6002148265402059	0.38213268324926125	92.31817659783644	69.0	1.3455822894449387	38.927556238114065	glycerol
1.5588671392544238	2.0617421873618116	2.230218642457683	0.9911737548947336	1.2390448875629492	98.70575851199197	69.0	1.3903906841585525	26.642332880588054	glycerol
1.5892569264727743	1.7818572353122017	1.8014574310754325	0.9911737548947336	0.8102836761806991	82.95901087440214	75.0	1.5696567307095435	26.642332880588054	glycerol
3.164381125140363	2.221092385484321	3.6582306807396017	1.6252661532545813	2.0329645274850203	129.04910707529194	72.0	1.7272428298850824	46.479101602117915	glycerol
1.7774577063946577	1.8903337085790473	2.0463152414468024	1.6252661532545813	0.421049088192221	103.33975289249811	87.0	1.6214761735269025	46.479101602117915	glycerol
1.6320088442858371	2.46650126518314	1.9961878100541963	1.0407757654047558	0.9554120446494406	72.26463231715027	75.0	2.102322299414781	22.240227328191093	glycerol
3.7505291027841867	2.215220820604963	4.6852944685204765	1.8291153403698008	2.856179128150675	327.05635719608875	114.0	1.2804554548686733	48.68278654062097	glycerol
2.0802429620327523	1.6659332519257255	2.649694869406167	1.8291153403698008	0.8205795290363661	98.97878341365603	87.0	1.096481344552311	48.68278654062097	glycerol
1.7482844397594164	1.6145877251109506	2.001663379800855	1.0231576207234012	0.9785057590774537	92.18503853451465	69.0	1.361208785069512	27.345503175302426	glycerol
1.6540480548830738	1.8060919266305937	2.0138491457707435	1.0231576207234012	0.9906915250473423	84.52059298126922	66.0	1.446290835742924	27.345503175302426	glycerol
1.5667520261645005	2.1617631385973777	1.7315964469973752	1.1151093212288414	0.6164871257685339	62.35887554564252	69.0	1.996918717764503	23.98257137314498	glycerol
1.6987607350590381	2.653579181406171	2.3677762413754313	1.3248474347030834	1.0429288066723477	112.72307838085186	99.0	1.984563675089778	32.00373787742696	glycerol
1.578939575596052	2.032623416612222	2.339090958023767	1.3248474347030834	1.0142435233206837	100.53051864545381	63.0	1.2724720341845073	32.00373787742696	glycerol
1.730515393344459	1.8341079122904957	1.8379286516845827	1.0008316899004275	0.8370969617841552	69.06157818431367	66.0	1.726694653950372	26.896683688606405	glycerol
1.5494508635312816	2.519373393648271	1.605857887717873	1.0008316899004275	0.6050261978174456	58.15393714682759	78.0	2.4629663694616797	26.896683688606405	glycerol
1.7150050489749187	1.6806248490849296	1.807527919220955	1.1695454790118835	0.6379824402090715	79.15033943420929	72.0	1.5881019788388933	24.291378086093108	glycerol
3.6786440593606513	2.609364394412744	2.3426472342602382	2.3426472342602382	0.0	155.15320675697146	234.0	3.945361219513157	57.70044773514133	glycerol
2.5074331191740398	1.4164899939152056	2.3726267908440914	2.3426472342602382	0.029979556583853366	125.37039351991521	189.0	1.551296322245154	57.70044773514133	glycerol
2.3097927978385364	1.6018801313447892	1.8775874283777694	1.1838881206877157	0.6936993076900537	82.89230388279867	87.0	2.0340855008055563	26.134780539369817	glycerol
2.2963914912759433	1.416977977032286	1.8775874283777694	1.1838881206877157	0.6936993076900537	82.20834687983314	81.0	1.8357820399304599	26.134780539369817	glycerol
1.8154828940917915	1.7172858784419214				90.58291782081436				glycerol
1.764435818501709	1.9742048697359993				85.84825084253079			27.930506062950638	glycerol
1.6116544683449767	1.9551350407171864				88.99874246685752			27.930506062950638	glycerol
1.787189340261228	1.8147727044829483				77.144430226787			29.00629096042804	glycerol
1.8482534383578253	2.2671707116473296				83.12562532159893			29.00629096042804	glycerol
2.0537794183982125	2.1834807791842907	2.6326499232190934			100.49284730885427	69.0	1.6046102743634099	27.14516643848783	glycerol
1.6647407211720247	1.623868548518183	2.1393215287797207			116.0683250028222	72.0	1.149287740910487	27.14516643848783	glycerol
1.5513410538323962	2.3223114696166025	2.2962930085267863			79.53468985893038	60.0	1.5773595149222124	27.495220619403508	glycerol
1.4167270783611394	1.6320683357454644	1.9466769640744046			111.24401279992475	72.0	1.1021184500321992	24.794684128384258	glycerol
2.0623298143114237	1.6239532090603137	2.454863151626982			107.41244061288856	63.0	1.2314198717447553	24.794684128384258	glycerol
2.2330603005697762	1.928838200295166	2.393006613852782	1.3163249616095467	1.0766816522432354	90.17839572154182	72.0	1.7688918870121602	31.596606436895573	glycerol
1.8811246910020372	2.0237098464594214	2.218400809127248	1.3163249616095467	0.902075847517701	88.26326907944292	72.0	1.6864337283342108	31.596606436895573	glycerol
1.75863695141175	1.7120798993410666	2.2059238902781853	1.0696607643898604	1.1362631258883251	91.76407399931229	60.0	1.2647929604746313	25.61139571033884	glycerol
1.6403159722983969	1.7446942477359182	1.7908729754309844	1.0696607643898604	0.7212122110411241	94.7199426904453	87.0	1.5941372446033306	25.61139571033884	glycerol
2.077202679944827	1.8771817672758573	2.39669191554245	1.196503306926391	1.200188608616059	87.20825583095163	63.0	1.5576925316782342	34.354773854919635	glycerol
1.9123661776470375	1.6456288328342579	2.352064069659917	1.196503306926391	1.1555607627335256	110.52737620252712	66.0	1.2059309408213785	34.354773854919635	glycerol
1.9384322655474293	1.4680257873558882	1.9069568425001202	1.109200404563624	0.7977564379364963	81.14267400030957	69.0	1.4995012104031973	28.940379861569802	glycerol
1.9190335975189183	1.6125057245663033	1.8625549248097537	1.109200404563624	0.7533545202461299	78.41647002560646	75.0	1.6689843972754679	28.940379861569802	glycerol
1.5225073869770358	2.0296601061658865	1.9233505695930477	0.9534784212500601	0.9698721483429877	71.18017820898184	63.0	1.6288169235498746	29.822034854575836	glycerol
2.1310122308145902	1.841389223908282	2.658019550709265	1.198345957771225	1.4596735929380402	103.50900456256105	60.0	1.314381904013607	31.956964306843492	glycerol
1.6293472472285937	1.67951427287462	1.9885861747699927	1.198345957771225	0.7902402169987676	93.92971305006076	69.0	1.320275345333221	31.956964306843492	glycerol
1.837333750602553	1.90283564669768	2.13634089436583	1.1760320348299584	0.9603088595358715	96.53922498052123	78.0	1.603828502934403	29.42101811764673	glycerol
1.6962965527202443	2.059552227495147	2.341263459483617	1.1760320348299584	1.1652314246536586	96.79524304975067	66.0	1.4145853207317747	29.42101811764673	glycerol
2.2355200616885407	1.887459652822101	2.618065692789554	1.3290097753546326	1.2890559174349212	105.31359514841239	69.0	1.504914021721088	32.78480355099369	glycerol
1.6789652592661712	1.7909432776642078	2.0375834035970004	1.3290097753546326	0.7085736282423678	85.9331897354318	66.0	1.4323251333333786	32.78480355099369	glycerol
1.5822667394718717	2.26118618996332	1.9497184577567277	0.9942930873849963	0.9554253703717313	79.66197274047633	78.0	1.8937344716784643	25.066880726593748	glycerol
1.667216622722581	1.7841616872379709	2.325141665393907	0.9942930873849963	1.3308485780089108	100.02562074247444	57.0	1.126236644566645	25.066880726593748	glycerol
1.65445252441282	2.136058480285822	1.9289857648843314	1.068170447182915	0.8608153177014164	67.72357469147909	66.0	1.8615252398143105	28.266673086193123	glycerol
1.5298490727437122	1.8628956136525539	1.9385834159884983	1.0187917017985002	0.9197917141899979	96.60040240040183	78.0	1.4541612704077678	25.830234757941096	glycerol
1.7867113941459172	1.7910079687568028	2.2520171583429938	1.0187917017985002	1.2332254565444936	98.8286695787917	66.0	1.3257022045597262	25.830234757941096	glycerol
1.8976576570167147	1.6643807883816282	2.3931720803885983	1.309032846394777	1.0841392339938212	125.48386437404704	72.0	1.1688663650097446	34.39261633366986	glycerol
1.831820097891008	1.6428885633065768	2.07465216189137	1.309032846394777	0.765619315496593	116.93194035737054	87.0	1.4000564993062148	34.39261633366986	glycerol
1.7453366542069866	1.9280607676148336	1.986487978512125	0.9748592288783638	1.0116287496337613	64.26916915241469	57.0	1.6869094433096952	24.34256522264418	glycerol
1.6336017920100374	1.7026138103838833	2.1297525081969977	1.037326080945685	1.092426427251313	101.9262931907304	66.0	1.206463094196923	28.18184765986166	glycerol
1.853382005678221	1.344135419091075	1.9931715178420075	1.037326080945685	0.9558454368963225	114.3885621415125	78.0	1.2043459069272886	28.18184765986166	glycerol
1.7337537154195515	1.8560803411545537	2.1689269922433225	0.9692917079942491	1.1996352842490734	111.42664200399733	81.0	1.4209070643307826	23.536139580672494	glycerol
1.6616887701662646	2.0718572595920124	2.118464703244515	0.9692917079942491	1.1491729952502663	77.06163484988413	63.0	1.6150813265137618	23.536139580672494	glycerol
1.842872413247856	2.3552012147132766	2.8625000392983186	1.1965860401942991	1.6659139991040197	108.6067684420075	60.0	1.3355735886628142	29.194733184872533	glycerol
1.5079506758669534	1.8403479149947162	1.8501934855788478	1.1965860401942991	0.6536074453845487	101.66496372485253	87.0	1.4981051052828218	29.194733184872533	glycerol
1.4827740955629307	1.8616789363564055	1.9276431481163308	0.9965857589210038	0.931057389195327	79.25203338235491	63.0	1.4168098838030054	28.51356931812648	glycerol
1.562038454657418	2.1942682994321103	2.4710814059099375	1.0648762540984988	1.4062051518114387	104.27488204489364	63.0	1.285225348179591	25.132335261692884	glycerol
1.5600545024902195	1.860099215962422	2.0266327482114783	0.9250967427894239	1.1015360054220542	87.4199406424705	66.0	1.393520970241163	23.1992411671839	glycerol
1.363871385502795	1.9423372016826246	1.8321415688846956	0.9250967427894239	0.9070448260952717	91.58726770213491	78.0	1.474067018300724	23.1992411671839	glycerol
2.259605603307688	1.4045386222724576	2.741628523025427	1.4312500196491593	1.3103785033762676	150.5580741299169	63.0	0.9225157025547186	28.351883280736246	glycerol
1.9002455082309262	1.5112973099660607	2.4367988843702824	1.4312500196491593	1.0055488647211228	142.13992855281782	69.0	0.9747439338267045	28.351883280736246	glycerol
1.6834936502335391	1.8983128573585188	2.165251569954853	1.0133163741057392	1.151935195849114	82.62724344118703	60.0	1.4165549376372049	24.00083849984953	glycerol
1.5714847267475738	1.7137046181017908	2.054777481463428	1.0133163741057392	1.0414611073576887	93.05838293233552	63.0	1.2304118633859367	24.00083849984953	glycerol
2.138425883452021	1.979876933009082	2.789217239056914	1.3708142615127135	1.4184029775442004	117.39811394265766	66.0	1.329085577404189	34.76316312781058	glycerol
1.382712781061859	2.071617350771891	2.0876914659136294	1.3708142615127135	0.716877204400916	90.84684297075583	66.0	1.3666386659201204	34.76316312781058	glycerol
1.6985266062439102	1.5805495762651882	1.8886419715723477	1.2183994421851412	0.6702425293872066	97.99731393953225	78.0	1.3904342109367507	29.234546280475787	glycerol
1.6502025248382997	1.9318958591597766	2.2705828610028287	1.2183994421851412	1.0521834188176875	91.2211396626206	60.0	1.3115155229952475	29.234546280475787	glycerol
2.261338533986328	1.6251951276331909	2.791457531974051	1.394608619528457	1.396848912445594	138.22991041178852	66.0	1.0950761296454679	32.898859745415706	glycerol
1.8364310782212672	2.016475015659327	2.4379291660475775	1.394608619528457	1.0433205465191207	95.41250398821282	63.0	1.4149769278330164	32.898859745415706	glycerol
1.522743496257558	1.7806156899579086	2.0659509849039717	1.0438457329568147	1.022105251947157	88.60956250638425	60.0	1.2374082013114949	21.2725043240286	glycerol
1.7788024790977919	1.8270406056696094	2.161643288493722	1.0438457329568147	1.117797555536907	85.34178387803078	63.0	1.4441997962736792	21.2725043240286	glycerol
1.7297772154359579	2.0140503895526374	2.3323496499296117	1.2189645830237887	1.113385066905823	83.48835805814745	57.0	1.4114779550589835	28.252785818788723	glycerol
1.7015561597393143	2.0984710576776635	2.0400428306524114	1.2189645830237887	0.8210782476286226	80.23085895443252	72.0	1.7599843867645664	28.252785818788723	glycerol
2.005718746628547	2.275707402485788	2.760135624970433	1.3957287659870254	1.3644068589834077	104.20740855705854	66.0	1.5212905241439016	34.789823599789656	glycerol
2.1475126860529796	2.0913917228297656	2.5305758866758423	1.3800678124852166	1.1505080741906257	88.68277527482721	66.0	1.708328522206903	30.85721148659303	glycerol
2.0750879560077093	2.4570062025199784	2.335822867620308	1.3800678124852166	0.9557550551350912	87.84341648909275	84.0	2.19627129090738	30.85721148659303	glycerol
2.216341991023804	1.797523273849467	1.7502726960940844	1.123872098818327	0.6264005972757574	80.53111532062411	90.0	2.2635925687791865	31.85708012218984	glycerol
1.8891034353170895	1.623675471773295	1.931340247423839	1.123872098818327	0.8074681486055119	93.86407417744121	87.0	1.5814386596665455	31.85708012218984	glycerol
2.2429598030240046	1.584687693238363	2.6663431810018325	0.8751363480470422	1.7912068329547906	132.28641918224173	69.0	1.161304315260535	34.0975690926739	glycerol
1.4711594553265233	1.8461634942515994	1.774805744200172	0.8751363480470422	0.8996693961531298	99.73864692282845	90.0	1.5425172053779508	34.0975690926739	glycerol
1.6005967716227034	1.5968581128765784	1.671339172272542	0.9656701237119195	0.7056690485606224	96.16211984872841	90.0	1.52611571222674	29.06312977410907	glycerol
1.503416518126635	1.925440787039606	1.5439383889173988	0.9656701237119195	0.5782682652054792	78.18522137061746	90.0	1.8849189162488422	29.06312977410907	glycerol
1.7821549504933334	2.1445377073529803	2.204517464735451	1.2652879433379212	0.9392295213975298	68.43954905345558	57.0	1.7221751931108629	33.038656708507375	glycerol
1.590388202651553	2.0185750742269315	1.8076289529732803	1.3331715905009163	0.4744573624723641	81.20415593498296	81.0	1.801334323905204	34.50707389267699	glycerol
1.4986511153056368	1.9439334711829317	1.8881193889056298	0.835669586136271	1.052449802769359	90.01293646994296	78.0	1.5544651975829387	24.62456571727236	glycerol
1.4916215795822132	2.0171810513986643	1.9685444958269105	0.887402872100086	1.0811416237268245	89.94429107587091	75.0	1.540258135153967	22.633222389638817	glycerol
1.7194891191820676	1.3086933684636217	1.83551933688448	0.887402872100086	0.948116464784394	95.53295699842649	69.0	1.1926631507612093	22.633222389638817	glycerol
1.6824188788924643	1.816794828279476	1.8612350122423742	0.9038144764866402	0.9574205357557339	82.34785410698073	75.0	1.637978694929566	24.467510810023892	glycerol
1.7077198606889785	1.8231782120802282	1.840989480883931	0.9038144764866402	0.937175004397291	83.01813125357705	78.0	1.6899085918852756	24.467510810023892	glycerol
1.8091571159794966	1.9724295183284157	2.546013000835902	1.143238733369378	1.4027742674665238	115.63693749260972	66.0	1.2355736334720104	34.049645611766316	glycerol
1.6512438763391513	2.542098066823736	2.5268994677350087	1.143238733369378	1.3836607343656306	102.63677845625746	75.0	1.6664424754278788	34.049645611766316	glycerol
1.6022246808281457	1.548718329110044	1.7376786815774292	0.9306175061211871	0.8070611754562421	76.86732334184204	66.0	1.4132643283607604	25.883367367576373	glycerol
1.6453763971964221	1.8274649213390575	1.7729938565889396	0.9306175061211871	0.8423763504677525	83.51127118365208	81.0	1.69984746194654	25.883367367576373	glycerol
1.6824273169246435	2.4249965768464383	1.801997776413063	0.9204947404419656	0.8815030359710974	60.573601065270125	72.0	2.305426117358019	26.272613241368898	glycerol
1.4939556873156303	1.8876829234371373	1.8575830658502475	0.8688393407887146	0.9887437250615329	76.36274839219922	66.0	1.5240555449025202	24.649610474279164	glycerol
1.9552354663934683	2.1276020052313993	2.483831037871584	1.273006500417951	1.210824537453633	112.96990766837746	81.0	1.5990064337532837	27.83318639968456	glycerol
1.7425591667916687	1.6847788404305153	2.1206813864632057	1.273006500417951	0.8476748860452545	95.29852058575989	66.0	1.3066566207589783	27.83318639968456	glycerol
1.9678760477621493	1.937595346882813	2.170315353520885	1.2634497338675044	0.9068656196533805	84.94653009698978	72.0	1.7351560411240774	25.40375194367925	glycerol
2.1437003540517616	2.1260246851035833	2.4847691304659647	1.2634497338675044	1.2213193965984606	84.50364968146926	66.0	1.7849559086893803	25.40375194367925	glycerol
1.6921572391056527	1.9605396699254747	2.131535610001703	1.0603406932316028	1.0711949167701	81.07389292993633	63.0	1.5211612990294245	26.80860256602567	glycerol
1.4724558306576567	1.842909456563625	1.8694572731525458	1.0603406932316028	0.8091165799209431	87.1092430858061	72.0	1.445908014068736	26.80860256602567	glycerol
1.7833049546204685	2.2168519330247998	2.6042772312847005	1.0851576767604425	1.519119554524258	82.36785964115654	51.0	1.3958796563605675	30.275016119417682	glycerol
2.1269034058491307	1.5816671875354023	2.4641283597566126	1.241915518935792	1.2222128408208204	127.1648067565184	75.0	1.2444422336279204	30.08054563682259	glycerol
1.8611024098664974	1.9163263539034516	2.187958468902374	1.241915518935792	0.9460429499665819	102.81546895955219	81.0	1.5894702948675752	30.08054563682259	glycerol
1.7122645021707417	2.0000592432913122	2.3334626251792487	1.0657678050008514	1.2676948201783975	94.05088291764002	63.0	1.3788611202828052	26.03318829393312	glycerol
2.038931431598818	1.5842270006855275	2.1555875013457557	1.2320641798783063	0.9235233214674495	112.12456798493571	84.0	1.4675709309385896	32.72159085921739	glycerol
1.5886627589547033	1.576131176503638	1.6564256257992844	1.2320641798783063	0.42436144592097824	99.56766868390835	93.0	1.508368309659057	32.72159085921739	glycerol
1.7886481219933894	1.8608947555571165	1.8331782202065292	1.093979234451187	0.7391989857553423	84.56074593833591	84.0	1.8163646573439767	28.632344767176882	glycerol
1.8871143197134224	1.6009300024364892	1.9749675849464705	1.093979234451187	0.8809883504952835	91.39771998339495	75.0	1.513076737203441	28.632344767176882	glycerol
1.7279634447957684	2.4111022274827203	2.2903995493539617	0.9165891101032646	1.3738104392506971	73.79591012142514	63.0	1.8486661229245267	27.517663415282914	glycerol
1.7877917309524418	1.7444009435679881	2.03792215093207	0.9165891101032646	1.1213330408288054	79.39857718642615	63.0	1.49427052358836	27.517663415282914	glycerol
1.983269103948678	1.7262347302174224	2.31934412719463	1.0777937506728779	1.2415503765217522	106.27159778235637	72.0	1.3901597069714704	31.368175870751045	glycerol
1.5739160626405009	1.77800658581261	1.779186274472178	1.0777937506728779	0.7013925237993002	101.77601408488715	93.0	1.5727363739809328	31.368175870751045	glycerol
1.517112970047544	1.9920419394600208	2.22104002230275	0.8282128128996422	1.392827209403108	81.83203795347299	54.0	1.2881148872048147	24.44096552238005	glycerol
1.6081360629656751	1.6009392149212684	1.8705110788842068	0.8282128128996422	1.0422982659845643	96.31126301041505	75.0	1.3385641990027368	24.44096552238005	glycerol
1.9942740482451504	1.4945400537988034	2.168796413872063	1.159672063597315	1.0091243502747478	148.7222800348434	102.0	1.320017688171891	30.5118323684412	glycerol
1.5779952301481825	1.694011630476867	1.8935763290751289	1.159672063597315	0.7339042654778137	91.24755983853909	72.0	1.3784305315499208	30.5118323684412	glycerol
1.6988866693997453	1.5389651419212158	1.7761561210238683	1.110520011151375	0.6656361098724933	93.50341063716195	81.0	1.4616956902970928	23.340199539192984	glycerol
1.7130236641026395	1.6355518092220833	1.7545254581940644	1.110520011151375	0.6440054470426892	86.86638177656089	81.0	1.5940500151306585	23.340199539192984	glycerol
1.596040185228233	1.8410929863001426	1.608856742726164	0.889593137236089	0.7192636054900751	100.29738865886002	117.0	1.8282764288022118	24.214093271392322	glycerol
1.5901720159544985	2.1837672502185055	1.7337209072762179	0.889593137236089	0.844127770040129	96.23956960454717	108.0	2.0402183588967864	24.214093271392322	glycerol
1.6326241439929552	1.8504300878815783	2.1747067851968316	0.9467881645375644	1.227918620659267	101.54046598689872	69.0	1.3083474466777019	24.276849694587423	glycerol
1.417184671108531	1.996182749682495	1.7283414588522148	0.9467881645375644	0.7815532943146504	73.3341352103835	72.0	1.6850259619388113	24.276849694587423	glycerol
1.7395124407032203	1.7665398827983683	2.0726465727314176	1.0843982069360314	0.9882483657953861	118.67504888133841	90.0	1.433405750770171	30.681139203771544	glycerol
1.5834707456009407	1.8607273882205568	1.8342445996781107	1.0843982069360314	0.7498463927420792	99.01185060077013	90.0	1.6099535341433868	30.681139203771544	glycerol
1.751955747896354	1.6763150014547763	1.6833027808376495	0.804428371363082	0.8788744094745675	105.31590098074284	105.0	1.744967968513481	24.55446438812666	glycerol
1.6386645003534936	1.6131937738334683	1.8493326076359737	0.9171222998390554	0.9322103077969185	103.16119541145127	84.0	1.4025256665509882	24.361088393860626	glycerol
1.6112855191691913	1.6873288638116954	1.9773114813766097	0.9171222998390554	1.0601891815375546	101.58197272011607	75.0	1.321302901604277	24.361088393860626	glycerol
1.9164728026808173	1.619864665232359	2.068993092153103	1.0363232863657088	1.0326698057873942	135.77695167968105	105.0	1.4673443757600735	26.761729856972618	glycerol
1.6998039673865357	2.433113480227137	1.919800427497972	1.0363232863657088	0.8834771411322633	170.85453066553646	189.0	2.2131170201157	26.761729856972618	glycerol
1.5483227781062647	1.9780260530226739	2.0615635485213444	0.9246663038179869	1.1368972447033572	116.21356653551074	90.0	1.4647852826075942	25.21022308236144	glycerol
1.3662020183109689	1.8038919292813855	1.7821901607793798	0.9246663038179869	0.857523856961393	93.87701440492754	78.0	1.3879037868129747	25.21022308236144	glycerol
1.6973208804965618	2.128018162332517	1.9197052688143275	0.9886557406883049	0.9310495281260225	84.4473353687735	84.0	1.9056337740147515	24.789007987218326	glycerol
1.8617650815114508	2.8596949887873713	2.313272970777276	1.0344965460765514	1.2787764247007245	134.07201800754473	138.0	2.4081870995215464	29.484196964320265	glycerol
1.5373626934168763	2.2350871630427127	2.165843456512918	1.0344965460765514	1.1313469104363667	127.40878273985746	102.0	1.606606399946671	29.484196964320265	glycerol
1.9890284063949208	1.791345896346041	1.6599067579504818	0.959900213748986	0.7000065442014958	100.38153558783691	147.0	2.12046754479048	26.150830267485166	glycerol
2.1167739399317207	2.236869828497657	1.6599067579504818	0.959900213748986	0.7000065442014958	86.50883558149678	144.0	2.693737010478896	26.150830267485166	glycerol
1.6560471415020006	1.7303534536903469	1.855689670865602	1.082921728256459	0.772767942609143	84.30159809182024	90.0	1.5307109243267454	23.651733744875017	glycerol
1.925345170920307	1.4487056556181488	1.9690390122934975	1.082921728256459	0.8861172840370386	92.66528395078866	72.0	1.4050118142449584	23.651733744875017	glycerol
2.593012917006803	1.6429946103316766	1.9904528513847939	1.156636485388638	0.833816365996156	97.44719971227286	102.0	2.2455546759536853	28.64253971556078	glycerol
2.14253870205971	1.4803451473112146	2.1178506185025983	1.156636485388638	0.9612141331139604	102.92718467911408	99.0	1.5050332308683263	28.64253971556078	glycerol
1.8728264942648287	2.0150520627642647	1.7042053840457143	0.8299533789752409	0.8742520050704734	56.93864230230682	75.0	2.183673172983379	30.60043702146032	glycerol
2.298275834017262	1.8109415376004283	2.298275834017262	0.9952264256923969	1.3030494083248652	121.67312114452423	102.0	1.8109415376004283	39.89250641548927	glycerol
1.907132815257644	1.5544971683773114	2.0732861541155065	0.9952264256923969	1.0780597284231097	87.20461722831998	78.0	1.388343829519449	39.89250641548927	glycerol
1.5376466417590127	2.3473753227215046	2.1539400479884065	0.927844835432801	1.2260952125556055	74.03536675233099	63.0	1.7310819164921107	25.477648330800008	glycerol
1.811201890249648	1.6220229558666304	1.6373973430242443	1.0589253092512991	0.5784720337729452	97.54860620134752	105.0	1.795827503092034	32.962133877841694	glycerol
1.7303002458551213	1.6356933496116755	1.704912970617932	1.0589253092512991	0.6459876613666329	93.74902030938615	99.0	1.6610806248488648	32.962133877841694	glycerol
1.557527011921851	1.7542705354502348	1.9742604611336352	1.0366430770577533	0.9376173840758819	96.47567038038966	72.0	1.3375370862384506	29.3405048501176	glycerol
1.637446243768698	1.7923281981808914	1.8983957502374529	1.0366430770577533	0.8617526731796995	84.37504036427245	72.0	1.5313786917121366	29.3405048501176	glycerol
1.6207854173202498	1.8922226832274147	1.6678932366921961	0.8186986715121222	0.849194565180074	72.57974739189147	78.0	1.8451148638554684	27.8646444653792	glycerol
2.1903681499433127	1.8173052618514762	2.663196505784909	1.149137917008631	1.5140585887762779	117.0272902082631	69.0	1.3444769060098798	35.358089754111724	glycerol
1.6131127336492808	2.2566529489167007	1.8521146602715037	1.149137917008631	0.7029767432628726	135.45638677615074	144.0	2.017651022294478	35.358089754111724	glycerol
1.595746132905094	2.142136009215993	2.11926078341705	0.9491978751187264	1.1700629082983236	73.29050334136929	60.0	1.6186213587040372	25.191480673364584	glycerol
1.6320558234720595	1.8419579924130904	2.0694315326944066	0.9871302305668176	1.0823013021275893	96.33795690948573	72.0	1.4045822831907433	23.961954029566936	glycerol
1.4945017031365033	1.8655161159754106	1.8640355335435805	0.9871302305668176	0.876905302976763	84.70194399887349	72.0	1.4959822855683333	23.961954029566936	glycerol
2.32451095178252	1.879436519284099	2.7532980090074024	1.3315982528924546	1.4216997561149478	98.2665982991656	60.0	1.4506494620592165	33.697971537589424	glycerol
1.6746747898613612	1.6681619554079834	1.967766558992449	1.3315982528924546	0.6361683060999944	90.25343724415924	69.0	1.3750701862768957	33.697971537589424	glycerol
1.950725723330336	1.5234307330150485	1.7112700123754199	0.9260573301357519	0.785212682239668	75.6618810856341	87.0	1.7628864439699645	24.817118979219703	glycerol
2.3500365642686036	2.1201779450410863	2.5761314022514923	1.3766490045037012	1.1994823977477913	113.18791667987512	90.0	1.8940831070581976	35.761706950500304	glycerol
1.6763327911221588	2.0221050481600837	2.0193935553342897	1.3766490045037012	0.6427445508305885	89.34770064984181	78.0	1.679044283947953	35.761706950500304	glycerol
1.6068809947204121	1.549668459556695	1.8715295467869615	0.9838832794962244	0.8876462672907371	95.47418809330411	72.0	1.2850199074901456	25.764227536328633	glycerol
1.4618678611321776	2.0947599731668145	1.781208884541396	0.9838832794962244	0.7973256050451715	84.1975859992057	84.0	1.7754189497575963	25.764227536328633	glycerol
1.5354972537500022	1.9543943385552849	1.8095126458485598	0.9357647733934807	0.873747872455079	75.98294769409256	72.0	1.6803789464567274	24.721246072621724	glycerol
1.6769515034264153	1.638820804557928	1.9660843633185112	1.0096967776671448	0.9563875856513665	91.50954383647519	69.0	1.349687944665832	25.78973524803321	glycerol
1.77135121991548	2.1134414258625362	2.115041743165593	1.0096967776671448	1.1053449654984482	82.08388563614622	72.0	1.7697509026124236	25.78973524803321	glycerol
2.468673057225909	2.025796230652585	2.689286834663739	1.2880657011257461	1.4012211335379927	97.17554790020976	72.0	1.805182453214755	36.154408681055436	glycerol
1.771719754575254	1.8016971969037223	1.9995283041424343	1.2880657011257461	0.7114626030166881	85.95531298028523	72.0	1.573888647336542	36.154408681055436	glycerol
2.6286862360238774	1.8730601863529617	2.8555102066726286	1.3446434173318695	1.510866789340759	100.4969647122801	66.0	1.6462362157042105	37.97958549578321	glycerol
1.736327849405334	1.6391274337917767	1.9832243983745192	1.3446434173318695	0.6385809810426497	78.20298084216566	60.0	1.3922308848225915	37.97958549578321	glycerol
1.7809119844095482	1.7959971825505572	1.7809119844095482	0.9997641520712172	0.7811478323383312	95.41820991249489	96.0	1.7959971825505572	27.257226993465448	glycerol
1.798288286002308	2.1566430530851597	1.7440028563561347	0.9997641520712172	0.7442387042849176	73.87678730198532	87.0	2.210928482731333	27.257226993465448	glycerol
1.6269352855328578	1.884911631315756	2.3368161010569213	0.9916121991872596	1.345203901869662	91.88584131211336	54.0	1.1750308157916924	26.712736144697445	glycerol
1.4677346969957552	2.1902758553709667	1.8314386854232174	0.9916121991872596	0.8398264862359578	75.14413886592037	75.0	1.8265718669435047	26.712736144697445	glycerol
2.3822450635229564	2.011464079189452	2.8759733452721816	1.4277551033363143	1.4482182419358673	132.48519609783392	81.0	1.5177357974402268	40.44132670805965	glycerol
1.66782966035841	1.5286399568278042	1.8657860689083416	1.4277551033363143	0.4380309655720274	92.70038483950545	72.0	1.3306835482778725	40.44132670805965	glycerol
1.6202349125571083	2.186167673004517	1.8609293641455722	0.9328930344541708	0.9280363296914013	90.08093965177031	93.0	1.945473221416053	25.658917851667844	glycerol
1.5823686909462622	1.667507640318704	1.767639528954497	0.9328930344541708	0.8347464945003261	75.12286679057276	66.0	1.482236802310469	25.658917851667844	glycerol
1.658401174359958	1.834636506816647	2.0449270390789756	1.1684080505284606	0.876518988550515	89.32815490212903	69.0	1.4481106420976295	25.02977362358243	glycerol
2.607809551252175	1.737663815436755	3.1081809282710364	1.4379866726360908	1.6701942556349458	130.3152980092724	63.0	1.2372924384178936	36.649924054199325	glycerol
1.7180439199268231	1.6858793017199918	1.795527394982031	1.4379866726360908	0.3575407223459402	94.27922021646496	87.0	1.608395826664784	36.649924054199325	glycerol
2.5295951958850815	0.48590778957926695				189.35499055418884				glycerol
1.8609077964539298	1.578949731818785				74.46333616345404			48.16390322572489	glycerol
1.6075792090804886	1.8971121470536623				61.366194335953544			48.16390322572489	glycerol
1.6736114914420073	1.3366747481182726				131.06066850867117				glycerol
1.6254241083497192	1.4917677903861297				108.57638772240756				glycerol
2.3356082657488764	1.1042727245266364				69.82235910274242			40.52280666688247	glycerol
1.6573656815641518	2.0134655026008415				96.75607271414736			28.62935071467584	glycerol
1.6316964724370213	2.0262663124454585				72.12357747141594			28.62935071467584	glycerol
1.3210667842574848	2.222359627831181				65.33460475277947			24.731987832007515	glycerol
1.477207776091675	1.454638214298993				94.04041055935335			25.006524743841833	glycerol
1.4772172866366111	2.414450451295192				79.42718028757399			25.006524743841833	glycerol
1.5085978370932804	1.6655937366129079				109.02169023484629			25.747869099107803	glycerol
1.4854919458284526	1.5839958521120332				106.01140522469775			25.747869099107803	glycerol
1.497774229096342	1.4167510611587564	1.9225024710449958			99.95410975299917	60.0	0.9920228192101026	22.72627347833346	glycerol
1.3126526557199638	1.8198554985953546	2.2736518347274055			90.84873855198835	42.0	0.8588563195879129	22.72627347833346	glycerol
1.661078067923442	2.3695233868517356	2.205888640762339			58.645281901910735	51.0	1.8247128140128384	22.726419794409402	glycerol
1.4777670301962316	1.7708092162180493	2.0250735886488482			92.39796044702733	63.0	1.2235026577654327	22.853722243514653	glycerol
1.3464115771037988	1.6971431980016822	1.7797239517210846			96.88622597662251	75.0	1.2638308233843965	22.853722243514653	glycerol
1.7563190916652558	1.6523639435573956	2.2222402440141367			97.21327458312349	60.0	1.1864427912085147	23.209197493742774	glycerol
1.3958211782500158	1.749795898602668	1.73076520248708			87.0137199178463	75.0	1.4148518743656038	23.209197493742774	glycerol
1.6722112762482026	1.9231095551129813	2.1840413583176854	1.1111201220070683	1.0729212363106173	116.80937849044449	84.0	1.4112794730434985	27.02029371792701	glycerol
1.5546518458881597	1.6617577381904147	2.0949167424904847	1.1111201220070683	0.9837966204834165	111.5497251069026	69.0	1.1214928415880898	27.02029371792701	glycerol
1.5469659311427222	1.718722298542624	1.896614669092458	1.0125367943244241	0.8840778747680339	91.84136587384178	72.0	1.3690735605928883	22.73487738763433	glycerol
1.4826332970169043	1.7756718640667062	1.6040930234973343	0.86538260124354	0.7387104222537942	79.22814805400925	81.0	1.6542121375862762	21.474171973077166	glycerol
1.5008709343957374	1.9141810699985717	1.9054790509774173	0.86538260124354	1.0400964497338772	78.40772435744802	66.0	1.5095729534168918	21.474171973077166	glycerol
1.6439016159676452	1.728689916711098	1.978858046585837	0.8020465117486671	1.17681153483717	89.70481565617311	69.0	1.3937334860929063	22.809743031029296	glycerol
1.4222871708346865	1.6035804459813054	1.7394715401726148	0.8020465117486671	0.9374250284239477	82.63430187603167	66.0	1.286396076643377	22.809743031029296	glycerol
1.4110243878218214	1.6413959999875296	2.0336244431031565	1.0474583712452423	0.9861660718579143	102.40648553494619	60.0	1.0187959447061945	23.91772070597169	glycerol
1.4374626251937317	2.4423128207229867	2.361574093194966	1.0474583712452423	1.3141157219497235	87.96126467738944	63.0	1.5182013527217526	23.91772070597169	glycerol
1.919643962345239	1.4580109558731362	2.09683178838433	1.0920206791588427	1.0048111092254877	117.76494167102584	81.0	1.2808231298340451	25.726327326895426	glycerol
1.7254007690481745	1.631274758976741	1.8578183628544285	1.0920206791588427	0.7657976836955858	112.48809712047964	96.0	1.498857165170487	25.726327326895426	glycerol
1.7711712548352319	2.049951353121711	2.334172848223835	1.048415894192165	1.2857569540316698	105.47260030862992	75.0	1.486949759733108	29.5329840360806	glycerol
1.4644441138638569	1.8716649858866417	1.8528272487140882	1.048415894192165	0.8044113545219229	88.39772817849556	75.0	1.4832818510364103	29.5329840360806	glycerol
1.5969132152336942	1.6195493056759784	1.9505910337727537	0.9289091814272142	1.0216818523455395	103.94094910376882	75.0	1.265871487136919	26.54462721612576	glycerol
1.6355159030670974	1.766285099468269	2.0877227119604393	0.9289091814272142	1.1588135305332252	85.18266786299469	60.0	1.314078290574927	26.54462721612576	glycerol
1.5234932658248443	1.6447254065087924	1.8193878616029793	0.9264136243570441	0.8929742372459353	93.7243685585202	75.0	1.3488308107306575	22.529909444059335	glycerol
1.689942841055335	1.5642162850717987	2.015979660461817	0.9264136243570441	1.0895660361047728	82.5125844925741	57.0	1.2381794656653167	22.529909444059335	glycerol
1.9711579576703724	1.8974883530566935	2.365193760184309	1.1670864241119174	1.1981073360723913	114.1053254897344	81.0	1.503452550542757	27.248788535926643	glycerol
1.4461888802544969	1.7898410220455003	1.8528998386244666	1.1670864241119174	0.6858134145125491	100.69115870807724	81.0	1.3831300636755306	27.248788535926643	glycerol
1.5630542848938234	1.5297651576077929	2.0189090317413565	0.9752955168863768	1.0436135148549797	97.50600680331515	60.0	1.0739104107602597	24.56789561897991	glycerol
1.6154910269507137	1.6460528997684154	2.0583436725186446	0.9096939308014896	1.148649741717155	85.8341726603526	57.0	1.2032002542004845	23.438357935766835	glycerol
1.3543402998909684	2.4914197084609073	1.8581364935371003	0.9096939308014896	0.9484425627356107	65.75109046620867	69.0	1.9876235148147752	23.438357935766835	glycerol
2.063802507688702	1.6624066150799721	2.245562507169306	1.1825968800921545	1.062965627077152	98.54485352650775	72.0	1.480646615599368	30.325507041082652	glycerol
1.7138586463891492	1.7756810413328667	2.071666473508007	1.1825968800921545	0.8890695934158525	87.73737465116677	66.0	1.417873214214009	30.325507041082652	glycerol
1.5458367978438774	1.690508007502096	1.9442430186900421	0.9264499193122333	1.0177930993778088	81.61524574312661	60.0	1.2921017866559312	22.24905969622303	glycerol
1.5763810105307108	1.7651026416828681	2.0086867253354432	0.9264499193122333	1.08223680602321	85.80344693370745	63.0	1.3327969268781357	22.24905969622303	glycerol
2.0425460192171707	1.894401529647213	2.406682470872169	1.122781253584653	1.2839012172875155	114.07941659628253	81.0	1.530265077992215	31.750807810595415	glycerol
1.581073947137265	1.451547860126658	1.6537131786162622	1.122781253584653	0.530931925031609	92.58660649713339	81.0	1.3789086286476608	31.750807810595415	glycerol
1.5540491796015363	1.608044776168652	1.8560610683100136	1.0358332367540035	0.8202278315560102	93.67242064744494	72.0	1.3060328874601748	26.3670560982946	glycerol
1.6499032899890567	2.0756288387733965	2.196554283214702	1.0358332367540035	1.1607210464606983	94.46285611525906	72.0	1.5289778455477516	26.3670560982946	glycerol
1.5467312612961088	1.9220101158328757	2.0600466018137986	0.9721215093450211	1.0879250924687776	79.81532798119068	60.0	1.408694775315186	23.7821045822135	glycerol
1.4361934272301866	1.7844125676056204	1.8943550952682258	0.8268565893081311	1.0674985059600948	90.1224035704624	69.0	1.3262508995675812	24.324214571342537	glycerol
1.4073490368700299	1.855412581744612	1.8473510473677963	0.8268565893081311	1.020494458059665	84.08117422601086	69.0	1.4154105712468457	24.324214571342537	glycerol
1.571109673683479	1.640664609817347	1.8216118816576379	0.9280305341550068	0.8935813475026311	84.33610797031253	69.0	1.3901624018431882	23.90844891694671	glycerol
1.4852281237882203	1.712451013031746	1.6571833176182247	0.9280305341550068	0.7291527834632179	75.92598219733367	72.0	1.5404958192017417	23.90844891694671	glycerol
2.031686827716744	2.067026704201075	2.602735218275992	1.2033412354360844	1.3993939828399078	100.74142489943206	66.0	1.4959783136418272	31.423784911033398	glycerol
1.5737430647952981	1.7342687817566074	2.0579758415970337	1.2033412354360844	0.8546346061609494	100.7684169535915	69.0	1.2500360049548718	31.423784911033398	glycerol
1.6101395645807441	1.9814804464089204	2.085735741146959	0.47358877381705644	1.612146967329903	80.34911408141957	63.0	1.5058842698427055		glycerol
1.437933116998811	2.328461565830694	1.8293022626413464	0.47358877381705644	1.3557134888242899	69.1051366271431	72.0	1.9370924201881585		glycerol
2.142052989299589	2.2508931210157894	2.7363302094483903	1.301367609137996	1.4349626003103941	127.38919494786492	87.0	1.656615900866988	31.256720426411444	glycerol
1.7281127868378203	1.991806064943905	2.1061902680655127	1.301367609137996	0.8048226589275166	84.08119102921823	69.0	1.6137285837162127	31.256720426411444	glycerol
1.5733128231734559	1.594878776056561	2.096677023463316	1.0289879207985169	1.067689102664799	115.85832801163043	69.0	1.071514575766701	24.21143176608151	glycerol
1.5812237297090068	1.945745250286848	2.314660357742978	1.0289879207985169	1.285672436944461	103.68179443735403	63.0	1.212308622252877	24.21143176608151	glycerol
1.5737386192301912	1.8884407024554344	2.1151392327292204	1.0530951340327563	1.062044098696464	84.3967540193422	60.0	1.3470400889564051	26.586350566735696	glycerol
1.831460475618137	1.5288561404036727	2.058195013115852	1.0530951340327563	1.0050998790830958	89.08150734334193	63.0	1.3021216029059577	26.586350566735696	glycerol
2.3433875880920336	1.779042158174021	2.3879272776833624	1.3681651047241952	1.0197621729591673	110.44309169763258	87.0	1.7345024685826922	32.954661373839826	glycerol
1.8176781719078903	1.6908306439080236	1.8531780861545022	1.3681651047241952	0.4850129814303072	107.50861217306266	99.0	1.6553307296614117	32.954661373839826	glycerol
1.6407200717905286	1.3687581102167345	1.8232786602834161	1.029097506557926	0.7941811537254899	78.84054216564651	57.0	1.186199521723847	28.1763150095098	glycerol
1.606050360682512	1.7367391202181093	1.8009486334524807	1.0575696163646102	0.7433790170878706	90.77710571111314	81.0	1.5418408474481407	24.211363372772173	glycerol
2.3252830449401523	1.8792050584668867	2.889323496611561	1.1939636388416812	1.6953598577698799	105.32181486348296	57.0	1.315164606795478	36.05211673987744	glycerol
1.6294927387566371	1.8932968245375306	2.0762806555566864	1.1939636388416812	0.8823170167150051	94.39938571375433	72.0	1.4465089077374813	36.05211673987744	glycerol
1.627612884617173	1.4641948055613674	1.942778178591848	0.9265890430772511	1.016189135514597	93.98364451688992	63.0	1.1490295115866922	27.964279567813694	glycerol
1.7393964374345101	2.053108762002354	2.1657557004010237	0.9265890430772511	1.2391666573237727	85.36638917121834	69.0	1.6267494990358404	27.964279567813694	glycerol
2.28528838962271	1.8464555901138975	2.7295982442456337	1.4446617483057804	1.2849364959398533	105.34020713275369	63.0	1.4021457354909739	35.77358530677157	glycerol
1.6625331879534815	1.5428356816013742	2.0848908364851266	1.4446617483057804	0.6402290881793459	91.85865703460227	57.0	1.120478033069729	35.77358530677157	glycerol
1.6604396935860137	1.63181041614328	2.085993791447893	1.0381403277783432	1.0478534636695502	82.02460090217328	54.0	1.2062563182814006	25.069119057794417	glycerol
1.636146182284383	1.590927027492796	1.8924897770173215	1.0381403277783432	0.8543494492389784	85.7208761612043	66.0	1.3345834327598576	25.069119057794417	glycerol
1.5691979146674595	1.525848864836659	1.9278288642640862	1.0424454182425633	0.885383446021523	101.02722320821931	69.0	1.1672179152400324	25.57743366082279	glycerol
1.4886494447916663	2.0535738999750293	1.930800889057226	1.0424454182425633	0.8883554708146627	71.96251503267915	63.0	1.6114224557094696	25.57743366082279	glycerol
2.327448471327308	1.5206378130877582	2.873772466332688	1.3647991221228168	1.508973344209871	128.20655607147125	54.0	0.9743138180823783	35.15828291727246	glycerol
1.6169667647055976	1.718835342062798	1.8689639760027628	1.3647991221228168	0.5041648538799459	100.50312063060309	84.0	1.4668381307656329	35.15828291727246	glycerol
1.6209180427744698	1.916771428726061	2.0103278616814313	1.0429968957239466	0.9673309659574847	77.26490951984283	63.0	1.5273616098190996	25.54522605516944	glycerol
2.1593156223136636	2.1972428681847878	2.665412030054082	1.436886233166344	1.2285257968877379	118.50508461526958	84.0	1.6911464604443696	35.80689955888166	glycerol
1.6436405354240664	1.3093398600674235	1.9284274842966929	1.436886233166344	0.4915412511303489	117.12137482954637	72.0	1.024552911194797	35.80689955888166	glycerol
1.5508477886333927	1.5313356939675777	1.9788540782064366	0.9639144321320431	1.0149396460743934	93.85448394871906	60.0	1.1033294043945339	24.141506379499376	glycerol
1.5378635877871853	1.8334726018468843	1.8601862071519204	0.9344819880013814	0.9257042191505389	87.4254815750966	75.0	1.5111499824821493	24.8764117647015	glycerol
1.691208356789541	2.1169768648542826	2.1249251288341955	0.9344819880013814	1.1904431408328142	81.97776557060365	69.0	1.6832600928096282	24.8764117647015	glycerol
1.4085911111090446	1.7241710792072786	1.6939272234906597	0.9642137421483464	0.7297134813423133	101.45836652036411	90.0	1.4388349668256635	25.28677746806256	glycerol
1.4568750799603032	2.2763979873281066	2.010155236822612	0.9642137421483464	1.0459414946742653	83.97395029753244	75.0	1.7231178304657981	25.28677746806256	glycerol
1.6755525860115574	1.7213595982982082	1.8073531424885163	0.9300931035759602	0.8772600389125561	82.38630298533327	75.0	1.5895590418212493	23.65943981211054	glycerol
1.4384313664341808	1.6953554969308273	1.6996376941909583	0.9300931035759602	0.7695445906149982	74.77229991039255	66.0	1.4341491691740498	23.65943981211054	glycerol
2.540549020204165	1.2287357530032321	2.563964628835162	1.332706015027041	1.2312586138081212	226.65358491794728	126.0	1.205320144372235	33.22024034328713	glycerol
2.0559492334122225	1.0610078145225623	2.0559492334122225	1.332706015027041	0.7232432183851815	174.90274433861563	105.0	1.0610078145225623	33.22024034328713	glycerol
1.8696245643543161	1.310270823132242	1.7764416573853872	1.005077618411306	0.7713640389740813	78.30539708486947	66.0	1.403453730101171	22.413462768620047	glycerol
1.5138969301206078	1.598419518180734	1.5138969301206078	0.8469636117453299	0.6669333183752779	72.13468279008246	75.0	1.598419518180734	21.670632478600684	glycerol
1.5015613695943286	1.4286142880013415	1.5015613695943286	0.8469636117453299	0.6545977578489988	77.75858584255664	75.0	1.4286142880013415	21.670632478600684	glycerol
1.5450519583708064	1.6912228840275907	2.076749010386991	1.0279746167061112	1.04877439368088	126.56106280463662	81.0	1.1595258320114064	31.62998820634188	glycerol
1.4969244689558205	1.537857938087764	1.7943174887929476	1.0279746167061112	0.7663428720868364	114.75182235249738	87.0	1.2404649182506369	31.62998820634188	glycerol
2.211008639881982	1.7635031485406993	2.5601403652686696	1.281982314417581	1.2781580508510886	99.28221391503918	63.0	1.4143714231540119	39.08536954160254	glycerol
1.503919896436296	1.5999826643483832	1.783478391593405	1.281982314417581	0.501496077175824	97.57445759770512	78.0	1.3204241691912744	39.08536954160254	glycerol
2.0681873706543117	1.3083608536031552	2.3569952200205444	1.2800701826343348	1.0769250373862098	127.26563450535707	66.0	1.0195530042369225	34.01551753664588	glycerol
1.684546685524068	1.4619109583984355	2.0318175301748154	1.2800701826343348	0.7517473475404806	99.84821846850112	63.0	1.1146401137476882	34.01551753664588	glycerol
1.4662061449225177	1.851124012121181	2.060356605115671	0.8917391957967025	1.1686174093189685	91.68590153596405	63.0	1.2569735519280276	23.137229175943016	glycerol
1.3633403192048554	1.7870072214988593	1.9692517469128428	0.8917391957967025	1.0775125511161403	101.79041410586754	69.0	1.181095793790872	23.137229175943016	glycerol
1.5914335961059256	1.2585684743292174	1.6939544766136563	1.0383745051934954	0.6555799714201609	99.92434219228713	75.0	1.1560475938214867	23.770030128781638	glycerol
1.7717142415301068	2.1127904124538337	2.5389768772503873	1.1784976100102722	1.360479267240115	127.1428078595645	78.0	1.3455277767335532	31.81826724083556	glycerol
1.586247978521575	1.8778529887283613	2.149263981408701	1.1784976100102722	0.9707663713984287	143.76197425701483	99.0	1.3148369858412354	31.81826724083556	glycerol
1.7089815036416496	2.48028364394116	2.170588471509648	1.0159087650874077	1.1546797064222405	104.3631193198554	99.0	2.0186766760731616	25.91610285421643	glycerol
1.337650910928546	2.8237789007337364	1.796787566118397	1.0159087650874077	0.7808788010309894	91.60989876193938	111.0	2.3646422455438856	25.91610285421643	glycerol
1.6762944096685064	1.7886922868907658	2.241252601200194	1.0301783025578355	1.2110742986423584	71.59396988449025	45.0	1.2237340953590783	22.557017614192578	glycerol
1.8150357396559194	1.8340581940800804	2.200665872309959	1.085294235754824	1.115371636555135	86.34890059351635	63.0	1.448428061426041	26.292023132948454	glycerol
1.8510124808248265	1.9874882071031954	2.3037483108224945	1.085294235754824	1.2184540750676705	85.53277020751912	63.0	1.5347523771055274	26.292023132948454	glycerol
2.026467676746059	1.5725325392844383	2.7609256229686547	1.2694884386251937	1.491437184343461	282.3941630378906	108.0	0.8380745930618425	27.257142177386257	glycerol
1.3039798462838037	1.7141410433236295	2.0906573747411175	1.2694884386251937	0.8211689361159239	198.22767584001136	105.0	0.9274635148663157	27.257142177386257	glycerol
1.6975516802134891	1.4962626845119862	1.8313080506075106	1.0746319907043504	0.7566760599031601	82.25262844322783	66.0	1.3625063141179647	24.40381505417808	glycerol
1.8636246728527677	1.8039671394872434	2.122761724401636	1.0746319907043504	1.0481297336972855	79.85897755131718	63.0	1.544830087938375	24.40381505417808	glycerol
1.75994026264606	2.2183641500607703	2.028140051779553	1.1003329361549794	0.9278071156245734	58.642192938783886	57.0	1.9501643609272774	27.92362676393722	glycerol
1.5825597420507858	1.6053399742756589	1.8976337734954878	0.9156540253037553	0.9819797481917324	80.17053293659608	60.0	1.2902659428309569	26.11617969559214	glycerol
1.3921503890537217	1.849322912632088	1.793919876463801	0.9156540253037553	0.8782658511600456	73.8107476146338	63.0	1.4475534252220088	26.11617969559214	glycerol
1.7088361701976045	1.5367295108046062	1.7593960338805117	1.061380862200818	0.6980151716796937	71.31620494119238	63.0	1.486169647121699	28.6711488131195	glycerol
1.8700643346013845	1.5349210566264864	1.929986957538051	1.061380862200818	0.868606095337233	65.92943634992811	54.0	1.4749984336898199	28.6711488131195	glycerol
1.587242203731492	2.1335417923460622	2.220226764469758	0.9488168867477439	1.271409877722014	80.54776725735485	60.0	1.5005572316077962	24.34707295462747	glycerol
1.5268067770127982	2.076158439123275	1.8923570241923122	0.9488168867477439	0.9435401374445683	77.50265592015562	72.0	1.710608191943761	24.34707295462747	glycerol
2.1430441912746794	1.737482659002099	2.3237734998872757	1.3804628114843274	0.9433106884029485	154.0992254931569	114.0	1.5567533503895028	31.176425796093213	glycerol
1.4127284703110357	1.67697425406857	1.670649755188085	1.3804628114843274	0.29018694370375764	111.6047868173698	99.0	1.4190529691915206	31.176425796093213	glycerol
1.4767322960633076	1.7069685581118	1.4933128894824272	1.0453286873705587	0.4479842021118685	89.3262794342007	102.0	1.6903879646926803	20.06122840436621	glycerol
1.7068124586456093	1.951052155040431	1.7068124586456093	1.0453286873705587	0.6614837712750505	92.75281077724304	102.0	1.951052155040431	20.06122840436621	glycerol
1.5672761249385574	1.5524898642591043	1.8735183198256031	0.7466564447412136	1.1268618750843893	81.55634150659226	60.0	1.2462476693720586	22.71895840097396	glycerol
1.3818168020400974	2.2509286307473193	1.6473084379503131	0.7466564447412136	0.9006519932090994	70.99349745704997	81.0	1.9854369948371038	22.71895840097396	glycerol
1.4456034711103665	1.4797558214125388	1.4456034711103665	0.8353248775940425	0.6102785935163241	91.45064752968918	93.0	1.4797558214125388	21.73428415863132	glycerol
1.5692938965165606	1.6131309825940265	1.6162115167108677	0.8353248775940425	0.7808866391168252	70.5874813184365	69.0	1.5662133623997194	21.73428415863132	glycerol
2.3412766272733556	1.4441991102880407	2.4802351503789004	1.1618867499436378	1.3183484004352626	108.19712697869176	66.0	1.305240587182496	32.96991063499507	glycerol
1.7254198740222917	1.3869230837936721	1.7254198740222917	1.1618867499436378	0.5635331240786537	95.17614792865652	81.0	1.3869230837936721	32.96991063499507	glycerol
1.4294493071937269	2.0912798301401763	1.764047702383148	0.8081057583554339	0.9559419440277143	69.2086873318136	69.0	1.7566814349507551	24.142983023331702	glycerol
2.0351160790388	1.7923429379428417	2.1987687535201483	1.2401175751894502	0.9586511783306981	161.31229733306478	129.0	1.6286902634614933	36.01964041959008	glycerol
1.676483229435398	1.7161001450340185	2.7867533654253935	1.2401175751894502	1.5466357902359433	126.85036582824479	36.0	0.605830009044023	36.01964041959008	glycerol
1.3907253302425258	1.8900660559230211	1.9776945260286891	0.8627099370111458	1.1149845890175434	94.49152017899225	69.0	1.3030968601368578	26.544921138804487	glycerol
1.4360428884908427	1.823816028161834	1.7991859209523884	0.8627099370111458	0.9364759839412427	101.46183759551056	87.0	1.4606729957002884	26.544921138804487	glycerol
1.4449003698216034	2.104911917087537	2.1544407886471677	0.7228017355551832	1.4316390530919842	83.28367677263428	60.0	1.3953714982619725	22.240053401697946	glycerol
1.2264054702637415	2.292948087506319	1.918070152943666	0.7228017355551832	1.1952684173884824	65.09413188530542	57.0	1.6012834048263946	22.240053401697946	glycerol
1.4680784625625356	2.06363568156739	2.0340017078356007	0.9888472630143446	1.0451544448212562	82.90960600933296	66.0	1.497712436294325	21.395774311423473	glycerol
1.4676306521587146	1.7750752641961902	1.929024465663568	0.9888472630143446	0.9401772026492233	76.06828401906607	57.0	1.3136814506913368	21.395774311423473	glycerol
1.5808535810534998	1.631450555143224	1.813385072254661	1.3933766827126968	0.4200083895419641	90.9175569649731	75.0	1.3989190639420628	25.792049683621507	glycerol
1.5768629699053296	1.6856869830428516	1.7444155794042047	1.3933766827126968	0.3510388966915079	102.96081986835239	93.0	1.5181343735439765	25.792049683621507	glycerol
2.2053788967700405	1.7086266903050045	2.408863396730959	1.0993843767600742	1.3094790199708848	141.3693512680341	99.0	1.505142190344086	31.30947813905846	glycerol
1.511397820889919	1.4885928321380326	1.7148488174094527	1.0993843767600742	0.6154644406493787	115.25925835144412	93.0	1.285141835618499	31.30947813905846	glycerol
1.5607102363733416	1.674274924787627	1.80564463422079	0.9066925361273305	0.8989520980934596	85.58742190850947	72.0	1.4293405269401787	24.320824323899995	glycerol
1.6836474438260578	1.9805434920797436	1.8246871979877965	0.9066925361273305	0.9179946618604662	77.54669960428542	78.0	1.8395037379180048	24.320824323899995	glycerol
1.322009700213551	1.8830035601294075	1.7759594199944007	0.8574244087047264	0.9185350112896742	91.57813334162881	78.0	1.4290538403485578	23.252274167537216	glycerol
1.4311056047008157	1.7784713139576858	1.6574832807526836	0.8574244087047264	0.8000588720479571	113.28012026328693	108.0	1.552093637905818	23.252274167537216	glycerol
2.0364658260216584	2.3105158549870244	2.4319231098270286	1.2044316983654795	1.2274914114615494	128.8911399652947	108.0	1.9150585711816541	33.92890610415447	glycerol
1.6260301573758214	1.3620367768818005	1.9166847350746483	1.2044316983654795	0.712253036709169	126.44407523343607	81.0	1.0713821991829735	33.92890610415447	glycerol
1.4296434775544609	2.1489101744677805	1.6093277269269894	0.902822317110395	0.7065054098165944	70.25648629800253	81.0	1.969225925095252	24.010926713436024	glycerol
1.4739941044904261	1.7679580003769584	1.8159648647503381	0.9583423675373242	0.8576224972130139	89.69934706069627	75.0	1.4259872401170464	25.015848575012637	glycerol
1.3906416947176725	1.936124477536288	1.6880860714921933	0.9583423675373242	0.729743703954869	85.82533302313088	84.0	1.6386801007617673	25.015848575012637	glycerol
1.423120019903021	1.6158638398423997	1.7868479070055103	0.8879797099972003	0.89886819700831	82.22694881075392	63.0	1.2521359527399103	20.338610772516166	glycerol
1.5707900956448262	1.505286790445566	1.8457340407312632	0.8879797099972003	0.9577543307340629	77.3513928287356	57.0	1.230342845359129	20.338610772516166	glycerol
1.9416244455528902	1.8593920201842957	2.4025167291018517	1.2159615549135143	1.1865551741883373	126.91912326460981	84.0	1.3984997366353342	31.33024347725628	glycerol
2.2058550176503915	1.4252260926794147		1.2159615549135143		100.13056109279128			31.33024347725628	glycerol
1.9388040196773655	1.0283608861242162	1.5060307346477873			107.50619127542612	93.0	1.4611341711537944	33.936231040775255	glycerol
1.7564342294082058	1.4412004165735564	1.5376339497669054			97.18222967926988	108.0	1.6600006962148568	33.936231040775255	glycerol
1.532532961345094	1.759973354054741	1.97749512507466	0.9079824323751691	1.069512692699491	81.57581973485102	60.0	1.315011190325175	22.676832376775785	glycerol
1.3651194931663901	2.0603714924164755	1.8550461640364615	0.9079824323751691	0.9470637316612925	74.58843298912937	66.0	1.570444821546404	22.676832376775785	glycerol
1.6111986699484648	2.013511806375117	1.8671176383148904	0.8440430357460966	1.0230746025687938	56.42321122848469	54.0	1.7575928380086918	21.394487611041114	glycerol
2.238814350159837	1.95071322407235	2.758885896218051	1.2012583645509258	1.5576275316671253	129.4172385428078	78.0	1.430641678014136	29.87114531619831	glycerol
1.39279651884002	1.5078206042049707	1.8060349101043012	1.2012583645509258	0.6047765455533755	136.0575876568998	93.0	1.0945822129406895	29.87114531619831	glycerol
1.3505640400049128	2.31000806167743	1.6787857736442187	0.7530153673238936	0.925770406320325	114.7022499933735	129.0	1.9817863280381245	29.827754148882544	glycerol
1.3896779483531296	2.3442311053399396	1.7702577717014922	0.7530153673238936	1.0172424043775985	103.09016595151738	111.0	1.963651281991577	29.827754148882544	glycerol
1.4911797779386697	1.7107398757471675	1.7011819588865102	0.7688169748834527	0.9323649840030576	78.91278816178198	72.0	1.500737694799327	27.02206506781855	glycerol
1.449241886038014	2.3276837056742314	1.7552556830010373	0.7688169748834527	0.9864387081175846	65.12706508889326	72.0	2.0216699087112078	27.02206506781855	glycerol
2.557961519249594	2.072152277328697	3.002907969934515	1.3794429481090256	1.6234650218254894	129.66485516126414	81.0	1.627205826643776	34.44329769476673	glycerol
1.5137220974445522	1.77443770411865	1.906371871936427	1.3794429481090256	0.5269289238274014	99.17975239564305	78.0	1.3817879296267752	34.44329769476673	glycerol
1.4574421283721326	1.812335242950421	1.7201895969850782	0.9030174550521506	0.8171721419329275	100.36424396686208	93.0	1.5495877743374753	21.427638751384922	glycerol
1.2576735785115898	2.3520124070736825	1.7873177399052609	0.9030174550521506	0.8843002848531102	82.83392958374489	84.0	1.8223682456800114	21.427638751384922	glycerol
2.8788477615707633	2.245184304926359	2.2063137147922482	1.5014539849672575	0.7048597298249906	100.9872701320901	93.0	2.917718351704874	39.353254142301445	glycerol
1.8261588533230189	1.3646012581853464	2.2419817146198273	1.5014539849672575	0.7405277296525699	74.52602563965021	66.0	0.9487783968885379	39.353254142301445	glycerol
1.5804503762731967	1.3884573174213608	1.8181463006687997	0.9531859359682135	0.8649603647005861	89.05047441621079	63.0	1.1507613930257579	23.288032268377727	glycerol
1.6135437133222998	1.7162673321213449	1.7963621640593226	0.9531859359682135	0.8431762280911091	77.49656261109676	69.0	1.5334488813843221	23.288032268377727	glycerol
1.5125688415288958	2.023913620756723	1.941790241481615	1.1209908573099137	0.8207993841717014	83.24394799304069	72.0	1.594692220804004	28.094751589584906	glycerol
1.490311564644358	2.3579171865640336	2.2127736529273494	1.1209908573099137	1.0917827956174355	78.91387686502273	63.0	1.6354550982810423	28.094751589584906	glycerol
3.0215428902983787	1.7476394112342253	2.3594533480148385	1.1031568573961241	1.2562964906187146	123.01495818014953	93.0	2.4097289535177655	44.289965562627124	glycerol
2.1339736880021873	1.381461051918846	2.45864948850299	1.1031568573961241	1.3554926311068658	91.64620856606858	72.0	1.0567852514180434	44.289965562627124	glycerol
3.187067876193903	0.5644819577209943				165.7761671003649				glycerol
1.8670408040430102	1.4399368006733813				87.29814240338702				glycerol
1.8592411877687285	1.4357934059248674				72.67620755610082				glycerol
1.4641580815277289	1.9134795181693844				72.14270019239294			28.60371058105736	glycerol
1.5870605010581977	2.064980175779067				72.35855666200182			28.60371058105736	glycerol
1.6502065355415114	1.5714113712778808				68.3839466686847			32.53965653311797	glycerol
1.5158273968925142	1.8214086625583321				102.7624431278295			28.72370467758477	glycerol
1.5655223367020537	1.4976074334468048				89.84239826572743			28.72370467758477	glycerol
1.4317952238312828	1.788737081361791				76.95767555548998			22.525508946580445	glycerol
1.7164020296482745	2.770650979335276				71.40895634739636			22.525508946580445	glycerol
1.8003918021795438	1.672502577103838				69.63291385863432			24.41631540089535	glycerol
1.4064037588509624	2.1618781806802083				78.17043775789988			24.08495902618544	glycerol
1.4576907811951858	1.713461522642361				90.96402163395031			24.08495902618544	glycerol
1.7874592160453362	1.8390878171133942				132.2639567316901			23.320421490654063	glycerol
1.6392041721517538	2.4084339126111907				138.02784040856122			23.320421490654063	glycerol
1.5348033503031202	1.8342233391898686	2.1123578691488127			84.63533345570964	57.0	1.256668820344176	21.63698090539942	glycerol
1.8093542544534347	1.7692682294304012	2.252829204431629			85.37197395234864	57.0	1.3257932794522067	21.63698090539942	glycerol
1.9082739938082633	1.5169504789595776	2.0851288602407423			117.30827875781951	84.0	1.3400956125270986	27.499372554543633	glycerol
1.574465212512229	1.6160077164082651	1.6858380162160758			91.27415083600474	84.0	1.5046349127044183	27.499372554543633	glycerol
1.888118238098123	2.128342183034019	2.12446789472111			88.15624941803536	81.0	1.8919925264110318	25.218525725411595	glycerol
2.0222942511995896	1.8622731265139607	2.1687983110368148			89.19460405906456	75.0	1.7157690666767356	25.218525725411595	glycerol
1.6903884838596213	1.7989469745363125	2.0725819239588623	0.8429190081080379	1.229662915850824	91.81353609400875	69.0	1.4167535344370714	24.222541730957367	glycerol
1.428871197191817	1.6896729468576042	1.8685734520401833	0.8429190081080379	1.0256544439321456	85.25779057053623	63.0	1.249970692009238	24.222541730957367	glycerol
1.8022720425959255	1.9985999729499835	2.1450381596658303	1.0425644301203711	1.1024737295454594	83.60321279337188	69.0	1.6558338558800787	29.35806144320405	glycerol
1.4959772235203974	1.463216136656334	1.853666535309417	1.0425644301203711	0.8111021051890458	106.69476543983109	72.0	1.1055268248673145	29.35806144320405	glycerol
1.9523281227839966	1.5211238158329008	2.2668442222470087	1.0725190798329152	1.1943251424140935	97.45244957097414	60.0	1.2066077163698887	27.72726219378347	glycerol
1.6932108110761617	1.6954451451214914	1.9007738140515094	1.0725190798329152	0.8282547342185941	89.91444058085428	75.0	1.4878821421461437	27.72726219378347	glycerol
1.6085525252928505	1.8938977791652896	2.1169326230078696	1.0362909619794312	1.0806416610284386	90.86037820511807	66.0	1.3855176814502705	26.005976674763403	glycerol
1.4934081260221095	2.337452546760413	2.2053049571824506	1.0362909619794312	1.1690139952030194	64.01483048074942	51.0	1.625555715600072	26.005976674763403	glycerol
1.3568791261771556	1.9992962002059156	2.064447054059188	0.9268332676547085	1.1376137864044793	94.14279675127774	66.0	1.291728272323883	23.015034208006114	glycerol
1.502442513091701	1.9072771745900665	2.019876536179392	0.9268332676547085	1.0930432685246834	91.344024612127	69.0	1.3898431515023755	23.015034208006114	glycerol
1.625675381526574	2.1434805591537773	2.5600436982478763	1.1334221111235043	1.4266215871243717	123.63972817688045	69.0	1.2091122424324752	30.035817273599946	glycerol
1.5794842467921786	1.9665304171197344	2.2273374581601817	1.1334221111235043	1.0939153470366774	102.85024125136869	69.0	1.3186772057517313	30.035817273599946	glycerol
1.5675318424316038	1.8061227918309775	1.8272300194787308	0.9503869070257547	0.8768431124529761	94.95237337326945	84.0	1.5464246147838505	26.04939709347941	glycerol
1.6772968066112868	2.0709121448303067	2.267593078226076	0.9503869070257547	1.3172061712003214	82.75409938356214	60.0	1.4806158732155175	26.04939709347941	glycerol
1.5936565329111212	1.7500413835253035	1.9295152972395564	0.9136150097393654	1.015900287500191	86.98874840111228	69.0	1.4141826191968683	24.11587449894775	glycerol
1.5138262992935914	2.4451611827035427	2.066104055880953	0.9136150097393654	1.1524890461415878	73.54362904532744	69.0	1.8928834261161813	24.11587449894775	glycerol
1.828405226862847	2.541833479517412	2.2008480081260955	1.1136687290800908	1.0871792790460046	112.16057392393704	111.0	2.1693906982541633	24.299757642956592	glycerol
1.6961175562925028	1.9160492878371556	2.294989434353965	1.1136687290800908	1.1813207052738741	96.27477445463907	63.0	1.3171774097756934	24.299757642956592	glycerol
1.9002747029792337	1.3844474791798322	2.218132368522885	1.2800218491239381	0.9381105193989467	174.78014568207394	99.0	1.066589813636181	25.010390485024217	glycerol
1.6117665673705295	1.809203580419653	2.1087896673381836	1.2800218491239381	0.8287678182142455	116.0474565849654	81.0	1.3121804804519988	25.010390485024217	glycerol
1.6612571329870078	1.925181630181812	2.1051148776831035	1.1474947171769825	0.9576201605061208	70.25276381597898	54.0	1.4813238854857165	26.09411625065389	glycerol
2.0966962284870725	1.3871844242369784	2.148012654892291	1.1004240040630477	1.0475886508292434	85.99774540309735	60.0	1.3358679978317598	28.129311182505337	glycerol
2.179097876273254	1.6833997594657153	2.1449807739064175	1.1004240040630477	1.0445567698433695	87.18785892875681	75.0	1.7175168618325518	28.129311182505337	glycerol
1.812043159381958	1.950901208302462	1.9543340818969117	1.0543948336690918	0.8999392482278199	82.5235400801293	78.0	1.8086102857875082	24.796408728777376	glycerol
1.6378784532912793	1.693958269977371	1.6815274739361485	1.0543948336690918	0.6271326402670567	79.06377523796002	78.0	1.6503092493325018	24.796408728777376	glycerol
1.6825293469979499	2.167457273214442	2.263803763929876	1.1090661842614424	1.1547375796684338	133.14110066985407	102.0	1.586182856282516	29.23499543044975	glycerol
1.476330446734587	1.8805723640365364	1.9963491712514758	1.1090661842614424	0.8872829869900335	124.038585678446	93.0	1.3605536395196476	29.23499543044975	glycerol
1.5978400559939396	1.6965027869272882	1.7369657115845465	0.8407637369680743	0.8962019746164722	74.72211256477058	69.0	1.5573771313366813	25.198130050635065	glycerol
1.8251179580269277	1.6405709775139425	1.907645802020627	0.9771670409484559	0.9304787610721711	94.03855429746275	81.0	1.5580431335202432	27.877587067414737	glycerol
1.7770156193612276	1.5385172436108672	1.8643471820703292	0.9771670409484559	0.8871801411218734	86.68743383782494	72.0	1.4511856809017656	27.877587067414737	glycerol
1.611708035103574	2.456052321718008	2.0746342804670492	0.9981745856257379	1.0764596948413114	123.53588740924474	120.0	1.9931260763545326	22.71277610360903	glycerol
1.6025246615679931	1.4887335239571224	1.7702582391666335	0.9981745856257379	0.7720836535408956	104.44717107461732	84.0	1.320999946358482	22.71277610360903	glycerol
1.9527361129535998	1.4078966501670094	2.001523608162637	1.131901881964938	0.8696217261976988	84.2658005580891	63.0	1.3591091549579724	25.885066876891536	glycerol
2.0474561926100643	1.4863960769195401	1.8951616972418122	1.131901881964938	0.7632598152768741	152.39853464140108	123.0	1.6386905722877922	25.885066876891536	glycerol
1.7016431250141317	2.0722150254416096	2.1825669456344436	0.9538229010103135	1.2287440446241302	83.54279255781476	66.0	1.5912912048212977	28.078737815798885	glycerol
1.7179600370813488	1.8662745071565303	1.9807478450067968	1.0007618040813184	0.9799860409254783	87.6557540182272	75.0	1.6034866992310823	30.042094045439995	glycerol
1.507116007619505	1.3902650863834625	1.862015956371675	1.0007618040813184	0.8612541522903565	108.17013420898625	69.0	1.0353651376312925	30.042094045439995	glycerol
1.7213341253959726	1.9754818214587202	2.254386977277076	0.9475808486209061	1.3068061286561696	92.49552483893505	66.0	1.442428969577617	31.499326040154834	glycerol
1.642620599762203	1.995930214849606	2.085233141765298	0.9475808486209061	1.1376522931443918	78.4406238850034	63.0	1.5533176728465112	31.499326040154834	glycerol
1.794100619379537	2.136083032911306	2.304295057326246	0.9903739225033984	1.313921134822848	124.631417451424	96.0	1.625888594964597	26.430154416636135	glycerol
1.6466230698637596	2.2674702999350638	1.965671097127882	0.9903739225033984	0.9752971746244835	105.6703487714012	105.0	1.9484222726709415	26.430154416636135	glycerol
1.4149474535814934	2.2945849137891856	2.266620760430984	0.9310079781858375	1.3356127822451465	97.08815705676813	69.0	1.442911606939695	23.18640011722315	glycerol
1.316456045711756	2.4099238072611753	2.112548599216386	0.9310079781858375	1.1815406210305488	87.9346123132061	72.0	1.6138312537565453	23.18640011722315	glycerol
2.13306924266967	1.607672338966811	2.4008411598988655	1.152147528663123	1.2486936312357422	140.6724006323026	90.0	1.3399004217376156	27.601547990454414	glycerol
1.7081952740387676	1.9514630143999518	2.1424667447064696	1.152147528663123	0.9903192160433466	100.9792219695369	78.0	1.5171915437322498	27.601547990454414	glycerol
1.7028168423736283	2.101271578080013	1.9100154900371034	1.133310380215492	0.7767051098216113	72.4370531984226	72.0	1.8940729304165376	21.768422362792204	glycerol
1.8743379921557515	1.8586136630563055	2.16362589303296	1.133310380215492	1.0303155128174684	72.43929414923203	57.0	1.5693257621790968	21.768422362792204	glycerol
1.8426517371546693	2.1233276904139844	2.250549743150199	0.9550077450185517	1.2955419981316476	62.39297299665171	51.0	1.7154296844184547	26.19718219036351	glycerol
1.7891705665917657	1.3623462701802687	1.7559974896618307	1.0712333723532348	0.6847641173085958	91.82675291693575	81.0	1.3955193471102036	26.279927292904116	glycerol
1.8309681724244915	1.5847781404258496	1.7202064266383412	1.0712333723532348	0.6489730542851062	73.36642020169091	75.0	1.695539886212	26.279927292904116	glycerol
2.0208854213942153	2.724118354980292	2.4233321282444735	1.2004205799494327	1.2229115482950408	229.00359650929607	222.0	2.321671648130034	32.816449887225694	glycerol
1.5810269665525432	1.472174236099103	1.903505290701108	1.2004205799494327	0.7030847107516754	123.22785057834699	84.0	1.149695911950538	32.816449887225694	glycerol
1.6896201376378601	1.5974901249773363	1.6896201376378601	0.8601032133191706	0.8295169243186895	78.11516104456658	75.0	1.5974901249773363	28.168741114222946	glycerol
1.5100517870510037	1.6573056242274924	1.6786097131647115	0.8779987448309153	0.8006109683337962	78.60151835395246	72.0	1.4887476981137846	27.5257010244887	glycerol
1.4461113551336324	1.7668296959692271	1.8165994188461154	0.8779987448309153	0.9386006740152001	72.93465577072557	60.0	1.3963416322567441	27.5257010244887	glycerol
1.400538139234155	2.1631808996913984	1.7886515454061267	0.951752645350554	0.8368989000555728	93.51327163290637	93.0	1.7750674935194266	24.323491793116048	glycerol
1.4324891096880126	2.044542473100159	2.00818021429347	0.951752645350554	1.056427568942916	98.48889886491796	78.0	1.4688513684947013	24.323491793116048	glycerol
1.4863983504109024	1.7365679039333575	1.9079245509498017	0.8393048565823558	1.068619694367446	83.2909208518727	63.0	1.3150417033944581	23.231565954630828	glycerol
1.4915813322114704	1.417045591043573	1.7853975008925997	0.8393048565823558	0.946092644310244	80.95522063960993	57.0	1.1232294223624437	23.231565954630828	glycerol
1.7460853043209372	1.7059255341046673	1.8272553273453969	0.8943257727030633	0.9329295546423334	91.52732086813685	84.0	1.6247555110802077	21.546740603602384	glycerol
1.64823320394362	1.9844232609365258	1.852951036152823	0.8943257727030633	0.9586252634497595	71.04611535899302	69.0	1.7797054287273228	21.546740603602384	glycerol
1.703302006674273	1.582061945710743	1.795208948677567	1.004090107146735	0.7911188415308321	79.13738611376593	69.0	1.490155003707449	22.038293995200192	glycerol
1.680594677577128	1.9700773420834519	1.70219448920442	1.004090107146735	0.6981043820576851	56.29069812199655	66.0	1.94847753045616	22.038293995200192	glycerol
2.822766264827847	1.3241620051756233	2.0892802181091095	1.2116660641222368	0.8776141539868729	124.33924065251517	111.0	2.0576480518943607	31.090544944526386	glycerol
2.3584687226591163	1.0791808911480785	2.226391983100941	1.2116660641222368	1.0147259189787046	104.86190653833489	78.0	1.2112576307062537	31.090544944526386	glycerol
1.750231220319491	1.4908134581736072	1.8424451134550135	0.9136276636726984	0.9288174497823151	80.99776814406451	66.0	1.3985995650380847	26.862850835706727	glycerol
1.5683397964787356	1.3934836990935373	1.5683397964787356	0.9136276636726984	0.6547121328060371	75.22506187060813	69.0	1.3934836990935373	26.862850835706727	glycerol
1.678878959739958	1.3343849395478597	1.6519893602648579	1.1131959915504706	0.5387933687143872	81.77014038241862	75.0	1.36127453902296	36.28413419475564	glycerol
1.6913788522190176	1.5263391440380027	1.6195526175356139	1.1131959915504706	0.5063566259851432	93.76636394273453	96.0	1.5981653787214065	36.28413419475564	glycerol
2.4725885419421707	1.6837181809210136	2.005258201141897	1.0446401090545547	0.9606180920873418	100.09610016643899	81.0	2.1510485217212874	43.427173305043794	glycerol
1.739917530621174	1.4658249755596067	1.9071329140249553	1.0446401090545547	0.8624928049704006	88.47152280938683	93.0	1.2986095921558254	43.427173305043794	glycerol
1.4960344988078136	1.6060605641138572	1.9665689090221428	0.8259946801324289	1.1405742288897138	91.24612665128653	60.0	1.135526153899528	25.82890707292243	glycerol
2.3694644815254113	1.450877279718362	2.4151732144705935	1.0026291005709485	1.4125441138996453	108.83119116152963	72.0	1.4051685467731798	38.03982372218724	glycerol
1.828205410891161	1.5896355020832067	1.9060755634769604	1.0026291005709485	0.903446462906012	99.70563892729578	84.0	1.5117653494974073	38.03982372218724	glycerol
1.4357830959800837	1.7383015464785516	1.7304324081141704	0.9535664570124777	0.7768659511016928	89.12167055806628	78.0	1.4436522343444649	26.767962009556523	glycerol
1.5380115932574407	1.9935318264892328	1.8702598392081944	0.9535664570124777	0.9166933821957166	85.05440248340231	78.0	1.6612835805384791	26.767962009556523	glycerol
2.0675637184775613	1.8237243363279543	2.432647580983164	1.2075866072352968	1.2250609737478673	115.09170203041211	78.0	1.4586404738223515	36.45329971577556	glycerol
1.5619792835805597	1.6637671475560543	2.1749989607371063	1.2075866072352968	0.9674123535018094	131.89866875968417	75.0	1.0507474703995077	36.45329971577556	glycerol
1.5834343989436366	1.6948674271100745	2.0802637343691774	0.9530377817384802	1.1272259526306971	91.43801236026175	60.0	1.1980380916845337	28.126237090633243	glycerol
1.6584917123483827	1.7776637618063167	1.9788210329055744	0.9530377817384802	1.0257832511670941	94.20285954534233	75.0	1.457334441249125	28.126237090633243	glycerol
1.5533081441558558	1.6800472132950988	1.8922546033313983	0.8652162040570852	1.027038399274313	73.74575386986697	57.0	1.3411007541195563	22.0889707073859	glycerol
2.054158578982755	1.3720986171058	2.2197216198983605	1.216323790491582	1.0033978294067785	134.13073058251635	84.0	1.2065355761901944	31.808672591962477	glycerol
1.8268760770074217	1.4214123264873524	2.0323349750783426	1.216323790491582	0.8160111845867607	97.55498833523012	66.0	1.2159534284164315	31.808672591962477	glycerol
1.5109034044664662	2.1320899046667243	2.076161785918466	1.0401318671845887	1.036029918733877	85.05859755886755	69.0	1.5668315232147245	24.360529214517484	glycerol
1.470773304736826	2.302976874716995	2.15672301650982	1.0401318671845887	1.1165911493252314	70.61814290423612	57.0	1.6170271629440007	24.360529214517484	glycerol
1.5880373739141487	2.035865649003873	2.1176521313415764	1.0874994803685532	1.0301526509730232	108.37608676312949	84.0	1.5062508915764456	24.030450516623993	glycerol
1.4655999440546315	1.7735681397777192	2.2626913752532274	1.0874994803685532	1.1751918948846742	110.1271551281482	57.0	0.9764767085791233	24.030450516623993	glycerol
1.6204216849279127	1.854758578129674	2.0151123853337856	1.0161674875391713	0.9989448977946144	95.3922354347917	75.0	1.4600678777238012	28.10578580011418	glycerol
1.5014898540854416	1.7306964414609494	2.177530931839946	1.0161674875391713	1.1613634443007743	89.50239696532843	51.0	1.0546553637064449	28.10578580011418	glycerol
1.999873528387646	1.6439681709111245	2.2850940561260495	1.1098608099491802	1.1752332461768695	155.9699188487068	105.0	1.358747643172721	31.602439676657763	glycerol
1.4117109474168763	1.7667171497679126	1.8121621147499711	1.1098608099491802	0.7023013048007908	99.92580468015164	81.0	1.3662659824348178	31.602439676657763	glycerol
1.57442251526444	1.7895131401192408	2.1331031013822868	1.088765465919973	1.0443376354623137	68.4726806118293	45.0	1.230832554001394	23.099843909006793	glycerol
1.649135812111031	1.889842394159344	2.1661706163603927	1.0075561926668928	1.1586144236934997	76.25115463023343	54.0	1.3728075899099825	24.92956438350635	glycerol
1.744661689088032	2.4412715631276356	2.3800095655147735	1.0075561926668928	1.3724533728478807	73.65741543995206	60.0	1.8059236867008939	24.92956438350635	glycerol
1.521671036350445	1.7918064445962794	2.0169112029402934	0.9060810573749856	1.110830145565308	154.9849558654289	111.0	1.296566278006431	21.718629960259634	glycerol
1.5624010543126958	1.394296511079155	1.9809232148673237	0.9060810573749856	1.0748421574923381	140.18358682813238	81.0	0.9757743505245271	21.718629960259634	glycerol
1.9215822996399654	2.172690117724719	2.576578756303047	1.1425470280630248	1.4340317282400221	134.7002099806051	90.0	1.5176936610616374	30.767285052117632	glycerol
1.5326482683973877	1.61194476572386	1.8517393430292814	1.1425470280630248	0.7091923149662567	109.9487543154847	84.0	1.2928536910919661	30.767285052117632	glycerol
1.8215925235256007	1.1390144746592428	1.9592536479139095	1.0830853081801963	0.8761683397337133	85.62954679492556	51.0	1.001353350270934	25.371320186323555	glycerol
1.5457944447062553	2.0182934321087815	1.7875031414753098	1.0830853081801963	0.7044178332951135	57.25264842158394	57.0	1.776584735339727	25.371320186323555	glycerol
1.5861167199014752	1.686933218932624	1.7527931159184034	0.9258696715146407	0.8269234444037626	83.2427013334248	75.0	1.5202568229156959	23.57920412919058	glycerol
1.5212888170457775	1.6444383392114093	1.9764080064281753	0.9258696715146407	1.0505383349135344	79.45194467999437	54.0	1.1893191498290114	23.57920412919058	glycerol
2.3868116198821077	1.4241097294061458	2.509521038178829	1.2882893781515234	1.2212316600273057	124.43428172629513	75.0	1.3014003111094246	29.56280460984562	glycerol
1.7373369339918334	1.4663723711387135	1.8960555612522287	1.2882893781515234	0.6077661831007052	95.14471159742986	72.0	1.3076537438783182	29.56280460984562	glycerol
1.6084208186112874	1.539117200242635	1.8896300968138016	0.8763965579592017	1.0132335388545999	77.43303186330218	57.0	1.2579079220401208	24.401795690791925	glycerol
1.4696283422789118	2.1739621944523684	1.9549574302555228	0.8763965579592017	1.0785608722963211	80.15821033012188	72.0	1.6886331064757572	24.401795690791925	glycerol
2.0227914148469313	2.351056821144885	2.7710867733908273	1.2547605190894144	1.5163262543014129	132.12822777384142	87.0	1.6027614626009887	36.72017876741704	glycerol
1.5591314233224858	2.020230570053708	2.07184063906573	1.2547605190894144	0.8170801199763155	95.0824115576744	75.0	1.5075213543104637	36.72017876741704	glycerol
1.5271758803562465	2.343653756711867	2.09600365432758	0.9480277806261144	1.147975873701466	105.08455803978515	93.0	1.7748259827405333	26.72826052295128	glycerol
1.4550105990723805	1.856894513042765	1.8404611347908812	0.9480277806261144	0.8924333541647669	88.48575513703665	75.0	1.4714439773242642	26.72826052295128	glycerol
1.8461733076527393	1.9365517832985406	2.1598329427178014	1.035920319532865	1.1239126231849363	92.76366661241732	75.0	1.6228921482334786	23.986637281884395	glycerol
1.654476688427814	1.6882730002905493	1.9837397929023304	1.035920319532865	0.9478194733694653	91.65628557295892	69.0	1.3590098958160328	23.986637281884395	glycerol
1.8917639331265912	1.7844470529054162	1.9448636975085438	1.04800182716379	0.8968618703447536	75.11835070753585	69.0	1.7313472885234635	23.495013543942253	glycerol
2.729855949860523	1.5423891341186766	2.8479996610409084	1.3855433866954137	1.462456274345495	343.56305887489214	201.0	1.424245422938291	31.11986792072202	glycerol
1.8988663423404166	1.3671499582534625	2.145296309632951	1.3855433866954137	0.7597529229375374	153.3754816729401	93.0	1.1207199909609282	31.11986792072202	glycerol
1.5991166407244024	1.5521143106523914	1.8946551093099644	0.9918698964511652	0.9027852128587993	85.83337352900863	63.0	1.2565758420668294	25.45348751427406	glycerol
1.758117404221054	1.7156166554557046	1.9093968409297422	1.0799164713589007	0.8294803695708415	100.7678823433794	87.0	1.5643372187470164	28.402666271580603	glycerol
1.7535032693997137	1.8252140381155437	1.9102274324495776	1.0799164713589007	0.830310961090677	72.87195913405235	66.0	1.6684898750656798	28.402666271580603	glycerol
1.5887880732746167	1.8999286669281474	2.2413818789511466	1.0726481548164755	1.1687337241346714	84.59865847577336	54.0	1.2473348612516175	29.213328343698716	glycerol
1.4811228372807097	1.8440853606145353	1.8788554198891831	1.0726481548164755	0.8062072650727076	87.42207390066875	72.0	1.4463527780060619	29.213328343698716	glycerol
1.754047366646186	1.7688846307146677	2.005784129309157	0.9546984204648711	1.051085708844286	77.52793859677709	63.0	1.5171478680516968	27.04796006493929	glycerol
1.8008750904361646	1.4131111048658178	1.916180837326142	1.1206909394755733	0.7954898978505686	100.51867472477292	75.0	1.2978053579758404	24.4428934349941	glycerol
1.6476429343935735	1.4807588411036074	1.8553662836876053	1.1206909394755733	0.734675344212032	87.56546771540042	66.0	1.2730354918095756	24.4428934349941	glycerol
2.4185614818960066	1.9268041912679696	2.4185614818960066	1.4239998305204542	0.9945616513755525	134.85883507481088	114.0	1.9268041912679696	41.99778384400804	glycerol
1.8339529521122235	1.473960538087668	2.0724457033299264	1.4239998305204542	0.6484458728094721	186.8467247290863	174.0	1.235467786869965	41.99778384400804	glycerol
1.5574026172614936	1.9060528230894884	1.827353801630142	0.9394277099445916	0.8879260916855506	78.05249269985731	72.0	1.63610163872084	22.786505188933994	glycerol
1.50922278531965	1.8595430214231157	1.7544374063409214	0.958090418663071	0.7963469876778505	82.87190151613444	78.0	1.6143284004018443	27.70577062209484	glycerol
1.5542303271541666	1.7976642000741647	2.0080462007838236	0.958090418663071	1.0499557821207528	81.17055625487959	60.0	1.3438483264445078	27.70577062209484	glycerol
2.7187476655457927	1.610056804362181	2.0427259324540366	1.2092807409480033	0.833445191506033	147.5351835439821	111.0	2.286078537453937	37.20863818301549	glycerol
1.7315784891131452	1.3049088811239644	1.9806921787536802	1.2092807409480033	0.7714114378056768	99.96105406881468	99.0	1.0557951914834294	37.20863818301549	glycerol
1.6286333194279232	1.4562838943814105	1.8961633311503903	1.0362228516649632	0.8599404794854272	136.7232079112149	96.0	1.1887538826589434	28.214660801726517	glycerol
1.5259653442772598	2.389745004187849	2.1541507533079556	1.0362228516649632	1.1179279016429926	90.47098849627598	78.0	1.7615595951571534	28.214660801726517	glycerol
1.3619221121767493	1.4978960037209992	1.657436268954237	0.9903460893768401	0.6670901795773969	95.30223549601541	75.0	1.2023818469435115	26.639669063279154	glycerol
1.436433008377514	1.5837820523530637	1.776234798974177	0.9903460893768401	0.7858887095973368	78.34647360689051	60.0	1.2439802617564009	26.639669063279154	glycerol
2.4113245773258196	1.7072918328786146	2.650234607704399	1.0213629662270183	1.6288716414773812	132.0672302375927	84.0	1.4683818025000352	41.82688716224296	glycerol
1.874123864306046	1.7826642227814211	2.087474186903504	1.0213629662270183	1.066111220676486	96.43694346270314	78.0	1.569313900183963	41.82688716224296	glycerol
1.3544238701291729	2.006466926183727	1.5759335433878574	0.8881173994870885	0.6878161439007688	68.6412799101168	75.0	1.7849572529250426	22.098969359654063	glycerol
1.3732586572388557	2.20567949077515	2.070326549884523	0.8287181344771185	1.2416084154074045	75.98079130731752	60.0	1.5086115981294825	20.952647879642296	glycerol
1.2724522968466396	1.7633515887902962	1.7418417433126137	0.8287181344771185	0.9131236088354951	86.09233882852195	69.0	1.2939621423243222	20.952647879642296	glycerol
1.6470245257632998	1.8032869201393058	2.3304930285012433	1.043737093451752	1.286755935049491	137.7869376222572	78.0	1.1198184174013623	28.83267483547763	glycerol
1.7200061513008755	1.520377712470613	2.230374436958554	1.043737093451752	1.186637343506802	128.0436349703527	69.0	1.0100094268129345	28.83267483547763	glycerol
2.349809710815848	2.262645235853198	2.9813225719000718	1.3251173038521995	1.6562052680478723	209.66280616095423	132.0	1.631132374768974	37.09730118962799	glycerol
1.4194091832175686	1.6582648546568914	1.758675095200363	1.3251173038521995	0.43355779134816325	174.64512845655355	141.0	1.3189989426740971	37.09730118962799	glycerol
1.8917351519153764	1.534031892441948	2.1182814640794816	1.0351632749422615	1.08311818913722	73.53654154300283	51.0	1.307485580277843	21.127056265213163	glycerol
1.5800739499495122	1.7053154275132576	1.9086159891598848	1.115187218479277	0.7934287706806079	88.06215377274759	69.0	1.376773388302885	26.461633096936545	glycerol
1.6990515582173187	1.9749211154336284	1.870995437049806	1.1652465142506216	0.7057489227991846	86.28350541120432	84.0	1.802977236601141	25.33883885789692	glycerol
1.5124116792358886	2.584238110996677	1.7511003098773623	1.1652465142506216	0.5858537956267408	70.95189832786792	87.0	2.3455494803552037	25.33883885789692	glycerol
1.5603297912571428	1.5597306021397346	1.598062901024683	0.8793375476001815	0.7187253534245015	87.02410867490742	84.0	1.5219974923721944	21.837064357193363	glycerol
1.725230228083031	1.7088396290089012	1.840241212791273	0.8793375476001815	0.9609036651910917	96.6640347149488	87.0	1.593828644300659	21.837064357193363	glycerol
2.7978686568311217	1.9029514145982174	2.216525655397076	1.4906612859500359	0.72586436944704	148.27990841924492	123.0	2.484294416032263	36.15091862793612	glycerol
1.8981290547679648	1.4384982019782857	2.15154645816579	1.4906612859500359	0.6608851722157543	110.5905921780945	111.0	1.1850807985804606	36.15091862793612	glycerol
1.6790024694777779	1.716462414864129				59.054841438556835				glucose
1.4107017312998127	2.492543479029289				22.475566324314332			25.89380836085433	glucose
2.0525893462792717	1.3858637552676698				56.42774894049158			41.831238524755165	glucose
2.079161901612141	1.723403265252501				37.88875284872509			14.674407971966813	glucose
1.8322736420635357	1.2464997142987364				48.08201588625971			14.674407971966813	glucose
1.4265134770120562	1.9148360848046335	1.4265134770120562			48.862419990577045	60.0	1.9148360848046335	32.11827094760159	glucose
1.30989402736144	2.2100575426285536	1.4223654868814826			50.48714912223318	66.0	2.097586083108511	32.11827094760159	glucose
1.615609085007739	1.765594569389701	1.6570238138485183			47.866705283971825	54.0	1.7241798405489217	31.57829763506572	glucose
1.4630482025877893	2.0528754687128643	1.6570238138485183			56.92030559395927	75.0	1.8588998574521354	31.57829763506572	glucose
1.6812349496324086	2.018124167443189	1.2947905875290011			44.825155335931484	72.0	2.404568529546596	31.98710617864832	glucose
1.4728096730050957	1.9052470075820083	1.4728096730050957	0.8285119069242591	0.6442977660808366	57.61414666720506	69.0	1.9052470075820083	24.855524384734444	glucose
1.6227194309747754	2.0550448123091156	1.6187305635468117	0.8285119069242591	0.7902186566225526	45.74660663541954	57.0	2.0590336797370794	24.855524384734444	glucose
1.6239855837650947	1.8251309903908992	1.6832924833330516	0.7132567385060281	0.9700357448270236	57.9743185334221	60.0	1.7658240908229423	21.946361184800864	glucose
1.50223640782014	1.6687872829560575	1.5566422605133974	0.7132567385060281	0.8433855220073692	58.4504080174633	60.0	1.6143814302628001	21.946361184800864	glucose
1.709519817196389	1.9548893182503555	1.3746165264701327	0.7111827434407413	0.6634337830293914	46.36408128992978	69.0	2.2897926089766116	20.152215805560612	glucose
1.6031881791531666	2.031698573575807	1.555407277931207	0.7111827434407413	0.8442245344904655	45.72525433549934	63.0	2.0794794747977665	20.152215805560612	glucose
1.8138292476291358	1.5478382710754264	1.6051774442749303	0.8416462416665258	0.7635312026084045	60.66472389613844	60.0	1.756490074429632	24.98439359638607	glucose
1.4924524802571795	1.7877622886934534	1.548622746610111	0.8416462416665258	0.7069765049435852	50.171406638088	66.0	1.731592022340522	24.98439359638607	glucose
1.432129661950302	1.9459226175678594	1.491863876641944	0.7783211302566987	0.7135427463852455	50.887315712209165	60.0	1.8861884028762173	23.111329351079075	glucose
1.731399235078061	1.3806698248921776	1.399924499909646	0.6873082632350663	0.7126162366745797	53.195535723208906	63.0	1.7121445600605925	26.300304879944445	glucose
1.80040143296914	1.740894305132719	1.464140785751395	0.6873082632350663	0.7768325225163288	43.03460739232626	57.0	2.077154952350464	26.300304879944445	glucose
1.572415414462438	1.6865118441303952	1.572415414462438	0.8025887221374651	0.7698266923249729	68.47916178502112	72.0	1.6865118441303952	27.90506534814055	glucose
1.4134161776299643	1.5329214323575222	1.4573445572019978	0.8025887221374651	0.6547558350645327	67.9414222567333	69.0	1.4889930527854887	27.90506534814055	glucose
1.6089951666066773	1.9344190367665572	1.4486856573534133	0.8126031270840985	0.6360825302693147	55.31264207523775	75.0	2.0947285460198213	24.057772675280766	glucose
1.6658566528688712	1.6086588178705643	1.7666893286418872	0.786207707231219	0.9804816214106681	70.76798342258004	63.0	1.5078261420975483	24.1910063763452	glucose
1.526341295654804	1.8472991134837817	1.526341295654804	0.786207707231219	0.7401335884235848	49.81521974935079	57.0	1.8472991134837817	24.1910063763452	glucose
1.3169463128270757	2.1674414655466894	1.506093691658522	0.7286722786009989	0.777421413057523	61.97867309396503	75.0	1.978294086715243	21.74486427123022	glucose
1.203240097642098	2.875371767716981	1.203240097642098	0.7286722786009989	0.47456781904109896	47.696008223358845	84.0	2.875371767716981	21.74486427123022	glucose
1.669632100892519	1.6751657577637056	1.4882723199280044	0.763170647827402	0.7251016721006025	53.87131321565798	63.0	1.8565255387282202	23.482173779304674	glucose
1.574136748027019	2.13469810192744	1.5517122943152029	0.763170647827402	0.788541646487801	55.806949596946	75.0	2.1571225556392566	23.482173779304674	glucose
1.6707596439294115	1.6600025611098883	1.3328709339130422	0.8833446643209436	0.4495262695920988	72.33649804302964	93.0	1.9978912711262575	25.628563890290327	glucose
1.382985427804328	1.747499353005571	1.499109007653057	0.8833446643209436	0.6157643433321135	71.2709914971797	93.0	1.631375773156842	25.628563890290327	glucose
1.4377231922937677	2.260920682377467	1.3788616380014524	0.7441361599640022	0.6347254780374504	46.214434152465145	78.0	2.3197822366697824	25.68664770603875	glucose
1.7349402770815918	2.402986989087013	1.3788616380014524	0.7441361599640022	0.6347254780374504	45.45373766206714	72.0	2.7590656281671526	25.68664770603875	glucose
1.7704346740692973	1.426254562607068	1.6181883250961113	0.6664354669565211	0.9517528581395903	77.4216353656339	69.0	1.578500911580254	25.703994521990946	glucose
1.4064010847935873	2.2555592752144493	1.6181883250961113	0.6664354669565211	0.9517528581395903	49.97797760432951	72.0	2.0437720349119255	25.703994521990946	glucose
1.4296950960495096	2.2454078514050346	1.533259731682842	0.7495545038265286	0.7837052278563135	59.46799665668518	75.0	2.141843215771702	21.276698889297354	glucose
1.133463285492562	2.6854812182828915	1.133463285492562	0.7495545038265286	0.38390878166603337	56.49278112099944	99.0	2.6854812182828915	21.276698889297354	glucose
1.593758956322377	2.5363713327239736	1.593758956322377	0.8090941625480557	0.7846647937743214	126.66024610835785	174.0	2.5363713327239736	27.237456524143035	glucose
1.3376716825188804	2.014401444755529	1.4167224644914223	0.8090941625480557	0.6076283019433666	72.43481401131822	90.0	1.9353506627829873	27.237456524143035	glucose
1.673351792416338	2.4840173169359145	1.817679772343263	0.8090941625480557	1.0085856097952073	50.26924266545457	60.0	2.3396893370089895	21.63693976605519	glucose
1.8230725397946876	2.221194345099712	1.2508114569871682	0.766629865841421	0.4841815911457473	46.97669156938218	87.0	2.7934554279072317	21.995309169992456	glucose
2.077139714009889	2.0043231333295	1.5560844594052903	0.9088398861716315	0.6472445732336588	52.33517144861774	72.0	2.525378387934099	25.74387372948212	glucose
1.872450582748676	1.5037968589202506	1.4325277526416336	0.9088398861716315	0.5236878664700021	49.38312263393221	69.0	1.943719689027293	25.74387372948212	glucose
1.646303632338187	1.8169416669141663	1.2944189955264982	0.7083612322457111	0.586057763280787	50.331154028427605	81.0	2.1688263037258553	20.57956434644431	glucose
1.702036303232082	2.368713262346386	1.3709137252376042	0.7083612322457111	0.662552492991893	45.308839600294846	78.0	2.6998358403408638	20.57956434644431	glucose
1.8413960115148207	2.135358446267092	1.8848381821832427	0.7780422297026451	1.1067959524805975	43.212427727499424	54.0	2.0919162755986696	31.955995600152132	glucose
1.691199715086854	1.1196069647250624	1.2442554775392085	0.6472094977632491	0.5970459797759595	65.48992250740181	72.0	1.566551202272708	25.327748189818262	glucose
1.620190100450984	1.672894305184545	1.2442554775392085	0.6472094977632491	0.5970459797759595	58.63518441716658	84.0	2.0488289280963206	25.327748189818262	glucose
1.9500340125130997	1.850519867302048	1.286250837377926	0.6854568626188021	0.6007939747591239	46.74302886514519	75.0	2.5143030424372217	26.185173895878183	glucose
1.818781179445276	2.2791508467811923	1.8954775115539257	0.7968794781611885	1.0985980333927372	151.03367528464398	168.0	2.2024545146725423	24.5193685588058	glucose
2.4290812028721565	1.5497413475870503	1.439041551078395	0.7968794781611885	0.6421620729172063	117.98898907503713	150.0	2.539780999380812	24.5193685588058	glucose
1.345508447286526	2.0292112488263028	1.3189291635235139	0.6221277387696043	0.6968014247539096	58.79620520177049	84.0	2.055790532589315	26.018457155182368	glucose
1.1889945280540724	2.762076379599062	1.237775725301207	0.6221277387696043	0.6156479865316026	46.75320189703625	93.0	2.713295182351927	26.018457155182368	glucose
1.3274696153407395	3.1861440119773152	1.3309501828712382	0.6221277387696043	0.708822444101634	35.68183855508778	81.0	3.1826634444468165	24.926001545399753	glucose
2.1900557459637624	2.4979548916942558	1.638816635910626	0.7195207755391975	0.9192958603714286	117.48545599082375	162.0	3.0491940017473924	37.37048004418702	glucose
2.009551973353475	1.6853771785010432	1.2361354371008315	0.7195207755391975	0.516614661561634	81.9417638477835	153.0	2.4587937147536865	37.37048004418702	glucose
1.5550280601109963	2.3499542431352047	1.5721297333751671	0.6594645817617569	0.9126651516134103	42.90955715091215	63.0	2.332852569871034	20.700129958254244	glucose
1.4268504481522195	2.215838813013873	1.5175000602201345	0.6594645817617569	0.8580354784583776	39.93581275500229	63.0	2.1251892009459574	20.700129958254244	glucose
1.6220890334081841	1.7857667585293298	1.5467790526026604	0.6180677185504158	0.9287113340522447	61.624000897085736	87.0	1.8610767393348535	30.916184205438075	glucose
2.130104634494775	2.054944548590491	1.4724117591039734	0.9477387557769629	0.5246730033270105	58.50232342259056	129.0	2.7126374239812927	27.981248914542707	glucose
2.1746618864314975	2.43404272186808	1.4724117591039734	0.9477387557769629	0.5246730033270105	52.603883365273525	129.0	3.1362928491956037	27.981248914542707	glucose
2.132554377817232	1.7646402573257909	1.3659308054083772	0.7362058795519867	0.6297249258563905	58.6305654852621	87.0	2.5312638297346455	32.77084053068885	glucose
2.0121177124152037	1.739088987906995	1.4153554521967395	0.7362058795519867	0.6791495726447527	53.41404472763865	81.0	2.335851248125459	32.77084053068885	glucose
2.3098844325733032	1.4857987043165326	1.3783776086655657	0.7362058795519867	0.6421717291135789	50.24151596152801	75.0	2.4173055282242704	33.45633671433073	glucose
2.056492303957194	1.53620798153687	1.4917762784027415	0.7362058795519867	0.7555703988507547	48.45425260603905	72.0	2.1009240070913227	33.45633671433073	glucose
1.7835805094237787	1.4086002390505141	1.3628879627027077	0.6891888043327828	0.673699158369925	57.1587797331737	72.0	1.829292785771585	35.53668357805082	glucose
1.903294325418255	1.7981104883336754	1.4204800238892166	0.6891888043327828	0.7312912195564338	50.0221842579883	69.0	2.2809247898627136	35.53668357805082	glucose
1.8752137375497948	1.7690581418591582	1.5438469574864144	0.7076777260983698	0.8361692313880448	59.46323160895332	72.0	2.1004249219225386	30.955657114080058	glucose
1.756512288500745	1.1840389032703782	1.3736693056053273	0.7076777260983698	0.6659915795069575	80.7131885336614	84.0	1.5668818861657958	30.955657114080058	glucose
2.1944039649645974	1.8787194025473513	1.7519145803603968	0.6829654027041886	1.0689491776562081	121.03466109155653	117.0	2.321208787151552	32.808528889495875	glucose
1.7689247604739629	1.2303679918231494	1.6908686392767416	0.6829654027041886	1.0079032365725529	94.51924131378625	84.0	1.3084241130203706	32.808528889495875	glucose
1.723285404454719	2.1937858002051494	1.4264915305831003	0.7719234787432072	0.654568051839893	43.052009330848946	72.0	2.490579674076768	28.849442116150687	glucose
1.6989091203981064	3.0895121981525415	1.4264915305831003	0.7719234787432072	0.654568051839893	44.14888724911547	87.0	3.361929787967547	28.849442116150687	glucose
1.2882195860112207	2.0419240314201974	1.404389097408434	0.8454343196383708	0.5589547777700633	72.25191667608905	90.0	1.925754520022984	27.214227084214812	glucose
1.7713195523900171	2.1990401954560586	1.7781894474853879	0.7132457652915501	1.0649436821938376	46.37401449192287	60.0	2.1921703003606883	26.512083145457215	glucose
2.092800520438117	1.3963854033389373	1.6858618768372922	0.8759572901801984	0.8099045866570939	93.56494609236601	102.0	1.8033240469397622	33.76006099945534	glucose
1.8028100736903423	1.6598698075322962	1.6858618768372922	0.8759572901801984	0.8099045866570939	89.20591421014315	117.0	1.7768180043853463	33.76006099945534	glucose
1.5515394702728116	1.5862730506126617	1.5267996221675906	0.8429309384186461	0.6838686837489444	53.146532715483694	72.0	1.6110128987178827	32.19693108366334	glucose
1.6426125643110774	2.111156430950704	1.4036843055315258	0.8429309384186461	0.5607533671128796	83.02947676481949	126.0	2.350084689730255	27.735539595236034	glucose
1.6248836268583309	1.625903332591353	1.4508151731515098	0.7633998110837953	0.6874153620677145	50.97692707433062	57.0	1.7999717862981741	23.8698380041971	glucose
1.4638999835983522	1.8831692906109536	1.2901337256929435	0.7633998110837953	0.5267339146091482	45.26095120673361	69.0	2.0569355485163623	23.8698380041971	glucose
1.6112733636847199	2.8484621215583226	1.5488465790912511	0.7805559887941108	0.7682905902971402	53.10613472628958	84.0	2.9108889061517913	25.904723587053194	glucose
1.4821600751112394	1.7412891190185795	1.6084723780414376	0.7805559887941108	0.8279163892473269	50.851813556021995	51.0	1.6149768160883813	25.904723587053194	glucose
1.6181174737530803	2.2377193118022873	1.4381743162051408	0.7254075865757549	0.7127667296293859	47.89548687784097	69.0	2.417662469350227	24.99820964397432	glucose
1.592804225303141	1.872305896199917	1.380689007040085	0.7254075865757549	0.65528142046433	50.83239161418595	69.0	2.084421114462973	24.99820964397432	glucose
1.6379197860499763	1.4293200847497682	1.4256505592080093	0.8042361890207188	0.6214143701872904	53.03420332584788	57.0	1.6415893115917353	22.802462694019066	glucose
1.4647262581322766	1.8152797531823235	1.4256505592080093	0.8042361890207188	0.6214143701872904	51.58772426625071	69.0	1.8543554521065908	22.802462694019066	glucose
2.309212730227435	1.9499531600032358	1.6952800330223459	0.7744232895456256	0.9208567434767204	71.33395779255724	84.0	2.5638858572083247	24.78882097976492	glucose
2.0753123523995147	1.4212534234347616	1.8333788052774413	0.7744232895456256	1.0589555157318158	51.819656957916216	54.0	1.663186970556835	24.78882097976492	glucose
1.5050434139326412	2.1475611183016587	1.6204544574562454	0.9166894026387207	0.7037650548175248	56.28867830725396	66.0	2.0321500747780545	31.92788234460792	glucose
2.232259307098307	1.57998474288874	1.5009775961732703	0.8476400165111729	0.6533375796620974	101.01849248267743	114.0	2.3112664538137766	35.526349695806694	glucose
1.792843593686781	1.3392123233772248	1.5453762698688862	0.8476400165111729	0.6977362533577134	100.63857843906439	114.0	1.5866796471951197	35.526349695806694	glucose
1.7150897693366727	1.7792831378223959	1.5182844796662551	0.8102272287281227	0.7080572509381324	46.74947558205127	63.0	1.9760884274928134	23.154514060502173	glucose
1.6983967442075285	2.1972385398272074	1.5182844796662551	0.8102272287281227	0.7080572509381324	50.096640366418185	75.0	2.3773508043684806	23.154514060502173	glucose
1.887436261723182	1.9307367232782728	1.6503336778855915	0.7504887980866352	0.8998448797989564	73.78588711426599	96.0	2.1678393071158633	34.34245087843549	glucose
1.792857754766533	1.732433634594218	1.8292413212627971	0.7504887980866352	1.078752523176162	83.03591767412246	87.0	1.6960500680979538	34.34245087843549	glucose
1.3998923152403195	1.8999861603073778	1.4795193514686558	0.7726881349344431	0.7068312165342125	75.1759942014026	87.0	1.8203591240790415	27.582209133642785	glucose
1.4675582189750151	1.5845317713523277	1.832143896252991	0.7726881349344431	1.0594557613185478	93.71629733892712	69.0	1.2199460940743518	27.582209133642785	glucose
1.5073191992245363	2.3718972135435017	1.5073191992245363	0.7591422398331276	0.7481769593914086	43.99535615877496	60.0	2.3718972135435017	26.385996451333426	glucose
2.0548837599115988	1.9839400036576667	1.567293307720509	0.8251668389427957	0.7421264687777132	52.314216382588455	72.0	2.4715304558487565	29.03748094958741	glucose
1.8011825482892583	1.5960149341689172	1.705565002517702	0.8251668389427957	0.8803981635749062	52.436054478843545	60.0	1.6916324799404734	29.03748094958741	glucose
1.6068989177978532	2.157235553208146	1.5551974863024138	0.9146206606313986	0.6405768256710153	73.287575381693	105.0	2.208936984703585	27.5824269964082	glucose
1.5569468963836657	2.157762342868704	1.7190524544166195	0.9146206606313986	0.8044317937852209	55.00069714649845	72.0	1.99565678483575	27.5824269964082	glucose
1.6058997279384912	2.083949645936852	1.7452090076116484	0.852782501258851	0.8924265063527974	49.992496539922335	54.0	1.9446403662636949	27.710500742911666	glucose
1.5918861024047686	2.625023140753317	2.115002984765183	0.852782501258851	1.2622204835063318	51.229185402087495	51.0	2.101906258392903	27.710500742911666	glucose
2.121850039820287	2.2456995505231356	1.722557378114383	0.7836466538602544	0.9389107242541285	57.609140835896994	72.0	2.6449922122290395	31.61359630633229	glucose
1.8342951824616367	1.7086445438698987	1.7924064564956619	0.7836466538602544	1.0087598026354074	50.54115361268042	57.0	1.7505332698358735	31.61359630633229	glucose
1.6731413942405187	2.191612756095407	1.5026579511428753	0.8962032282478309	0.6064547228950443	54.64402729637945	78.0	2.3620961991930502	28.21992588402518	glucose
1.5893942966671695	3.108832927872273	1.565772071674448	0.8962032282478309	0.6695688434266173	44.127820813930875	78.0	3.132455152864994	28.21992588402518	glucose
1.674101958741476	1.8062745648880096	1.6284900530192246	0.8726045038058242	0.7558855492134005	42.61944825587011	54.0	1.8518864706102611	24.70614966059217	glucose
2.246569772383779	2.2711118546386384	1.8231695539439523	0.8612786890571915	0.9618908648867609	53.57893732932468	69.0	2.6945120730784655	32.64384676646595	glucose
1.7748827733612496	2.2458096902618907	1.8901802351075119	0.8612786890571915	1.0289015460503206	48.31653946715238	69.0	2.130512228515628	32.64384676646595	glucose
2.1953410585798645	2.1576140518036917	1.7895907345559725	0.9115847769719762	0.8780059575839964	57.718593339885274	75.0	2.5633643758275837	34.56261188282737	glucose
2.0040379581557843	1.388788709244107	2.010572204795574	0.9115847769719762	1.0989874278235978	51.344306308213966	48.0	1.3822544626043172	34.56261188282737	glucose
1.7831377530618255	1.4522802851926	1.5528309240568459	0.9450901175537559	0.6077408065030899	48.86368828890621	60.0	1.6825871141975797	27.3058888209423	glucose
2.029839212298202	1.553964007485508	1.6924131881825462	0.9450901175537559	0.7473230706287901	54.86961955909935	57.0	1.8913900316011638	27.3058888209423	glucose
1.3784556702277397	1.837156528823967	1.514493258757227	1.005286102397787	0.5092071563594399	44.18838615293121	48.0	1.7011189402944797	30.83135320239668	glucose
1.7004597976808968	2.014538522507339	1.7004597976808968	1.005286102397787	0.6951736952831099	53.218067247251334	60.0	2.014538522507339	30.83135320239668	glucose
1.473454736098773	2.5418161116891724	1.55031013016174	0.7764154620284229	0.773894668133317	43.559591195007215	66.0	2.464960717626206	27.43288850864347	glucose
2.009980822285678	1.677800171432418	1.95350667687952	0.8947953672779863	1.0587113096015335	68.52669085461277	69.0	1.734274316838576	33.774477824305606	glucose
2.094138412891512	1.4063065474429592	2.0994607601663793	0.8947953672779863	1.2046653928883928	64.76146342962598	51.0	1.400984200168092	33.774477824305606	glucose
1.4186280114151855	2.011806028534359	1.4767244471076815	0.7572466293786135	0.719477817729068	51.80961619999674	63.0	1.9537095928418626	21.207010311195994	glucose
1.5653028689581916	2.1616671924022053	1.6949168248766362	1.0497303800831896	0.6451864447934467	64.71915799846312	84.0	2.032053236483761	32.2175140444848	glucose
1.744391900831682	2.3084687688161956	1.897823512101256	1.0497303800831896	0.8480931320180666	49.33332661991676	54.0	2.155037157546621	32.2175140444848	glucose
2.098967162232363	1.5947446592496526	1.683445824720193	0.97675333843976	0.7066924862804331	73.58426474796433	69.0	2.010265996761823	30.922781881318123	glucose
1.5302832485047324	1.8089207020252445	1.6331289761437837	0.97675333843976	0.6563756377040239	58.629899285120885	78.0	1.7060749743861932	30.922781881318123	glucose
1.8311338833367208	1.869477132453041	1.5736074187996145	0.948911756050628	0.6246956627489864	41.3782414717517	60.0	2.1270035969901473	26.836798474333566	glucose
1.9997440800723933	1.602965213946006	1.6494590597749517	0.8417229123600966	0.8077361474148552	67.11671263632192	69.0	1.9532502342434477	32.29180249588251	glucose
1.5273640017438161	1.684467945307809	1.696736525302092	0.8417229123600966	0.8550136129419956	50.35657668903483	63.0	1.5150954217495332	32.29180249588251	glucose
1.503779411305728	1.7296571194272135	1.4487719159635506	0.8165644880718919	0.6322074278916587	57.04065799553716	75.0	1.7846646147693908	23.542819207765113	glucose
1.7233278579500766	1.8959236263585342	1.6114235899338152	0.8165644880718919	0.7948591018619232	58.85132520415482	66.0	2.0078278943747954	23.542819207765113	glucose
1.5590067383369495	1.8403974849498947	1.6280082196299162	0.848368262651046	0.7796399569788701	48.014734790029415	51.0	1.771396003656928	23.497907719135632	glucose
1.4262737700850825	2.288360142486413	1.5409513030300852	0.848368262651046	0.6925830403790392	45.62013714806649	66.0	2.17368260954141	23.497907719135632	glucose
2.076573229729105	1.9772727876142273	1.5913919653787678	0.8247295298874758	0.7666624354912921	96.36441503766194	105.0	2.4624540519645643	30.765293539575282	glucose
1.5734980829588836	2.0086388066253824	1.6931217652750636	0.8247295298874758	0.8683922353875877	45.49877849014719	60.0	1.8890151243092024	30.765293539575282	glucose
1.4366665138565866	2.2236587778922363	1.4366665138565866	0.8140041098149581	0.6226624040416285	44.46925991091007	60.0	2.2236587778922363	23.984719051337684	glucose
1.6680714643905241	1.5959131266848061	1.5615870153853102	0.8465608826375318	0.7150261327477784	55.75902161867775	63.0	1.70239757569002	24.207662814752055	glucose
1.7582189217548518	1.6595742864217602	1.8327996853578954	0.8465608826375318	0.9862388027203636	50.05472683234758	45.0	1.5849935228187166	24.207662814752055	glucose
2.251288087957984	1.7309407852052043	1.780768954706268	0.7956959826893839	0.985072972016884	58.335579733053535	66.0	2.2014599184569206	31.947280457370844	glucose
1.8040635632707942	1.7914463861241896	1.7055495851210676	0.7956959826893839	0.9098536024316836	51.25905138554249	75.0	1.8899603642739162	31.947280457370844	glucose
1.5220448408434972	2.033245363229139	1.572250717389732	0.7807935076926551	0.7914572096970768	51.4724190610801	66.0	1.9830394866829044	25.66263791370037	glucose
2.116858583392102	2.1448291059286055	2.116858583392102	0.890384477353134	1.2264741060389677	62.40713359865337	63.0	2.1448291059286055	34.635201353199754	glucose
1.7871580557294757	1.34750318761389	1.789177309700892	0.890384477353134	0.8987928323477581	59.212305312014095	57.0	1.3454839336424738	34.635201353199754	glucose
1.8011829642735595	1.9711122795061033	1.2995268216211016	0.8527747925605338	0.44675202906056777	59.07184864596332	87.0	2.4727684221585613	27.75482405031991	glucose
1.7402755215833887	1.7749548038202836	1.409358764045624	0.8527747925605338	0.5565839714850901	47.32311438902554	66.0	2.1058715613580485	27.75482405031991	glucose
1.3357982273303777	2.784195333513525	1.576433011939918	0.894588654850446	0.6818443570894718	62.77154934521411	87.0	2.5435605489039848	27.49473931891501	glucose
1.3705302282927165	2.5469875763958747	1.5765397796060774	0.894588654850446	0.6819511247556314	59.3978764742768	78.0	2.340978025082514	27.49473931891501	glucose
2.4291904005138676	1.8471126400981817	1.8649528562813968	1.058429291696051	0.806523564585346	77.21643145953564	75.0	2.4113501843306526	32.56705512910926	glucose
1.9001859910135	1.9676107958630762	1.8038354440030209	1.058429291696051	0.74540615230697	58.515385048930284	75.0	2.0639613428735553	32.56705512910926	glucose
2.009158752014139	1.3500044683664107	1.5079953935588746	0.9019177220015104	0.606077671557364	52.59535591426653	60.0	1.8511678268216754	29.233630630976922	glucose
1.9847400997591442	2.0632020490692318	1.6190742603735473	0.9019177220015104	0.7171565383720367	43.76416254462384	60.0	2.428867888454829	29.233630630976922	glucose
2.2017852705781986	2.3288407679853065	2.2017852705781986	0.9324764281406984	1.2693088424375003	97.97926056647208	102.0	2.3288407679853065	37.372160007905656	glucose
1.7768250222864947	1.8318475985923708	1.9722037296012638	0.9324764281406984	1.0397273014605652	93.91814900618138	105.0	1.6364688912776018	37.372160007905656	glucose
1.6674919584924814	1.8610412897165802	1.7972843587306364	0.7539976967794373	1.0432866619511993	55.48420697069155	54.0	1.7312488894784253	30.910134646371368	glucose
1.744616824442489	2.388322522805879	1.8404903629920113	0.8095371301867736	1.0309532328052378	43.39935985537353	60.0	2.2924489842563567	30.5344630732176	glucose
1.6148399167948306	1.9228261152053703	1.5114430334450144	0.9861018648006319	0.5253411686443824	71.59229270796236	105.0	2.0262229985551867	27.33576957363838	glucose
1.4922694691239458	2.263204614474495	1.5562029407760796	0.8986421793653182	0.6575607614107614	49.56864144239575	63.0	2.199271142822361	25.653722438345866	glucose
2.26334711198456	3.2581356601071834	1.9525768644151476	1.1008926352890993	0.8516842291260481	76.9471181147824	120.0	3.5689059076765957	33.8736195473569	glucose
1.8893415104535178	1.4297305126186093	1.9525768644151476	1.1008926352890993	0.8516842291260481	99.64368962618755	102.0	1.3664951586569796	33.8736195473569	glucose
1.479861784076219	2.4605510900008927	1.5297311256595465	0.7557215167225072	0.7740096089370394	42.4663203124598	75.0	2.4106817484175647	24.843691027612778	glucose
1.4859818237024358	1.909801581421989	1.4951016339023286	0.9762884322075738	0.5188132016947549	72.96650083082575	102.0	1.9006817712220963	29.066792468515658	glucose
1.470828012932959	2.113933714141191	1.470828012932959	0.9762884322075738	0.4945395807253852	58.35446616080216	75.0	2.113933714141191	29.066792468515658	glucose
3.1545527642409903	3.3228400686645667	2.05080423893386	0.9762884322075738	1.0745158067262865	54.914471413579534	90.0	4.426588593971697	34.82072479976246	glucose
2.448445446043088	2.1267279569603272	2.05080423893386	0.9762884322075738	1.0745158067262865	49.89132714455373	78.0	2.524369164069555	34.82072479976246	glucose
2.3526718628847014	1.8668437426209339	1.781438001492551	1.02540211946693	0.756035882025621	46.275571538673645	57.0	2.4380776040130843	37.66839147758596	glucose
3.3860479348623107	1.371458325325797	1.8352252114069576	1.02540211946693	0.8098230919400276	61.14921911677445	75.0	2.92228104878115	48.53158098832293	glucose
2.955171959951657	1.2801447594734832	1.8352252114069576	1.02540211946693	0.8098230919400276	46.22248862743423	69.0	2.4000915080181824	48.53158098832293	glucose
1.943823374092382	1.553345649380872	1.8503003085802783	0.9176126057034788	0.9326877028767994	49.569782018553475	51.0	1.6468687148929757	45.46418399925626	glucose
2.0750649261339036	1.987464967287076	1.6166966764161903	0.9176126057034788	0.6990840707127115	43.3337275627309	60.0	2.445833217004789	45.46418399925626	glucose
2.663763790980876	2.617789659122752	1.8121759380523923	0.9176126057034788	0.8945633323489135	60.7597292612337	84.0	3.469377512051236	52.09304515172786	glucose
2.036387663507342	1.7287471583107172	1.7515870792868782	0.9176126057034788	0.8339744735833994	50.75058451330753	72.0	2.013547742531181	52.09304515172786	glucose
1.7338141460220833	2.1304318774381086	1.3019625480128287	0.8757935396434391	0.4261690083693897	49.2978221630299	84.0	2.562283475447363	31.329040977036026	glucose
1.8970473023497216	2.371219576682077	1.4131486073900714	0.8757935396434391	0.5373550677466324	51.286665635478414	81.0	2.855118271641728	31.329040977036026	glucose
2.7758764018035316	1.6434895310737807	2.2254364222702057	0.9060879690261961	1.3193484532440096	67.07447329370025	60.0	2.1939295106071066	40.98098139970578	glucose
2.5186217962823045	1.2756602933992363	2.008284777438828	0.9060879690261961	1.102196808412632	60.89387722198046	60.0	1.7859973122427126	40.98098139970578	glucose
1.8999025960211435	1.4825249905040088	1.5456682674749052	1.004142388719414	0.5415258787554911	61.28823605590372	69.0	1.8367593190502471	38.74802763511238	glucose
1.8448533304565244	1.4344514943456201	1.6549215096560688	1.004142388719414	0.6507791209366548	57.83941663985111	60.0	1.6243833151460758	38.74802763511238	glucose
1.7836705706575995	1.709247311229923	1.5001006030465323	0.6509812740064144	0.8491193290401179	46.41167899508616	63.0	1.9928172788409901	26.674063784955127	glucose
1.984684554091099	1.337359042348488	1.77861537903881	1.1127182111351028	0.6658971679037071	56.51532307310345	63.0	1.543428217400777	42.70579079697741	glucose
2.818883643815169	1.257927951977741				45.085886547816365				glucose
1.8526955795011906	1.5947044445721932				60.27573703825435				glucose
1.658286130910802	1.7395000116681987				49.28002406517638				glucose
1.9505666024656603	1.348607357068091				51.436829108285494			43.367440674079525	glucose
1.4246074514831892	1.7047864956625707				71.34559639128649				glucose
1.4773617516251076	1.3566012938724956				76.61222336330084				glucose
1.6044979012642409	1.95994032705716				49.49838094322253			28.50300891540293	glucose
1.5633319628626439	2.1786224326958843				47.65051894212118			28.50300891540293	glucose
1.4556377517701327	1.9258759857210483				56.742588491385824			22.728642332693962	glucose
1.3961605099471919	2.3512907624344503				50.54600538334015			22.728642332693962	glucose
1.4341447114051242	2.001566929700319				88.06599803337006			21.91703771512599	glucose
1.3411987115963975	2.740975103105474				147.58864351803257			21.91703771512599	glucose
1.8612471840135851	1.8109987560460021				58.13994898969529			24.684583096372936	glucose
1.662242242036054	1.8422107062119688				41.81928343156943			24.684583096372936	glucose
1.7266825430222454	2.1931747005656375				55.79987957038533			22.394426950309732	glucose
1.6615954431869786	1.5924428143858285				55.689505546169265			22.394426950309732	glucose
1.8859168018701167	1.615219040257504				47.05581794696892			21.47939246072603	glucose
1.736794144497221	1.6246397588938803				75.57864786453385			22.063764790848065	glucose
1.6313425365361545	1.7785683830452894				87.43277808380637			22.063764790848065	glucose
1.7556694582856056	1.7275002299569837	1.509903361810999			42.49379897364019	63.0	1.9732663264315904	26.564346815726854	glucose
2.0420206246572326	2.022012990471235	1.401458575914104			51.36391862622391	78.0	2.6625750392143637	26.564346815726854	glucose
1.7298243335515224	1.7035447094878065	1.3635882542313311	0.7549516809054995	0.6086365733258318	48.53390206696629	63.0	2.0697807888079978	27.010299358240086	glucose
1.5062775924972214	2.3954389259429556	1.121176905986361	0.7549516809054995	0.3662252250808615	34.95685360161178	75.0	2.7805396124538158	27.010299358240086	glucose
1.8279249382945932	2.2558337474350036	1.505561644124193			103.47585849534536	132.0	2.578197041605404	26.719909915341862	glucose
1.397198648912267	2.7009651813763047	1.5475601986046266			94.6896189387956	156.0	2.550603631683945	26.719909915341862	glucose
1.6744731552975116	1.679993255282652	1.165331858265122			77.81510739605966	126.0	2.189134552315042	25.097577485171605	glucose
1.546224336462363	2.489720075781577	1.1933795273549366			52.01723359649577	117.0	2.8425648848890033	25.097577485171605	glucose
1.931486462793562	2.406200377877755	1.1530711918851149	0.5966897636774683	0.5563814282076466	41.12355250649653	90.0	3.1846156487862025	23.78806671480558	glucose
1.589123333508311	2.288522696317922	1.185006746274434	0.582665929132561	0.602340817141873	53.615135928833936	108.0	2.6926392835517987	25.761125466115562	glucose
1.5415214877856145	2.328841520610178	1.2171004126010705	0.582665929132561	0.6344344834685094	49.69453350343538	102.0	2.653262595794722	25.761125466115562	glucose
2.0519432832665303	2.418968166092862	1.3938202239727782	0.7527808220620965	0.6410394019106816	61.410950358749474	126.0	3.0770912253866145	28.121922127609125	glucose
1.7758887228514026	2.7541699708773937	1.3938202239727782	0.7527808220620965	0.6410394019106816	62.17669242275794	141.0	3.1362384697560186	28.121922127609125	glucose
1.9125023109054258	1.7298822218164687	1.1079315858025554	0.7737800993023133	0.33415148650024196	71.01189552217906	150.0	2.5344529469193393	21.495363829419492	glucose
1.8270001848846613	2.153759775391717	1.1325315629074586	0.7737800993023133	0.3587514636051452	61.41155256633844	150.0	2.8482283973689198	21.495363829419492	glucose
2.204077014597456	1.9525059510680474	1.4394354355553567	0.6969101119863891	0.7425253235689675	55.72410136492044	90.0	2.7171475301101466	31.568358204100463	glucose
1.9772852478125522	1.81493946782103	1.3451813057498745	0.6969101119863891	0.6482711937634853	57.4759473602151	99.0	2.4470434098837077	31.568358204100463	glucose
2.1295561551697424	1.302998702010525	1.0852585083740103	0.6969101119863891	0.38834839638762125	52.27012010252028	102.0	2.347296348806257	27.321364966944657	glucose
2.229546524270435	1.4905790499251523	1.0852585083740103	0.6969101119863891	0.38834839638762125	52.80252688158475	105.0	2.6348670658215774	27.321364966944657	glucose
1.9034842243583496	2.0382517509176292	1.3280946615898606	0.7197177177776783	0.6083769438121822	57.13259873840528	96.0	2.6136413136861183	33.908877147653165	glucose
1.8638268127647117	1.0338369408460697	1.3785911407090912	0.7197177177776783	0.6588734229314129	98.9597627946865	96.0	1.5190726129016903	33.908877147653165	glucose
1.580259009400884	1.6097504879446958	1.1079915972640235	0.5426292541870051	0.5653623430770184	47.365319908402824	81.0	2.0820179000815564	32.76240238722681	glucose
1.6920079791228173	1.5050123465477605	1.0647780775848712	0.5426292541870051	0.5221488233978661	45.75205540101545	78.0	2.1322422480857064	32.76240238722681	glucose
1.7737669770421995	1.6072797399874614	1.2283276929935902	0.6725906528749372	0.5557370401186531	58.0237461547261	90.0	2.1527190240360707	30.419773043270034	glucose
1.793492518576527	1.732833496617389	1.142586983824702	0.6725906528749372	0.4699963309497649	58.43791555634816	99.0	2.383739031369214	30.419773043270034	glucose
1.4057265043939053	1.9610002003225553	1.2244579427755118	0.6141638464967951	0.6102940962787167	57.14146574628141	99.0	2.142268761940949	27.288722723726146	glucose
1.9013616964062532	1.866009953470325	1.4729982664006571	0.6640473307949303	0.8089509356057268	54.73756907014635	78.0	2.294373383475921	29.284372682436146	glucose
1.605031678197275	1.6449398218399471	1.5275982359204867	0.6640473307949303	0.8635509051255564	56.00175224806348	78.0	1.7223732641167355	29.284372682436146	glucose
1.3481874425399305	1.9741957095942089	1.332032042413819	0.6892955703545456	0.6427364720592733	59.94478770197055	90.0	1.9903511097203204	28.674258657918642	glucose
1.3368352115188762	2.262662672013578	1.3043340802852437	0.6892955703545456	0.615038509930698	58.783433543934294	99.0	2.2951638032472106	28.674258657918642	glucose
1.6978010846608007	1.5823615190928484	1.9551242238574402	0.7364991332003286	1.2186250906571119	88.411756194265	66.0	1.3250383798962089	29.25171840625005	glucose
1.6043417886299831	1.4019163822114014	1.7458679367343977	0.7364991332003286	1.009368803534069	76.16000091491878	75.0	1.2603902341069868	29.25171840625005	glucose
1.6414523816774387	1.5385693326808685	1.6414523816774387	0.7637991179602434	0.8776532637171953	110.05554235493311	105.0	1.5385693326808685	24.692795049188845	glucose
1.3961590828068997	1.6618202691284625	1.4796435378511008	0.7637991179602434	0.7158444198908575	71.61073491698386	75.0	1.5783358140842614	24.692795049188845	glucose
1.6810650118929273	1.7002763937303054	1.3966671067885004	0.6660160212069095	0.7306510855815909	47.608648820024996	63.0	1.9846742988347323	20.741345269845084	glucose
1.6477226515992764	2.2151203430051147	1.816236706471548	0.9775621119287201	0.8386745945428277	85.4221339897033	93.0	2.046606288132843	26.12001668708924	glucose
1.2063379078281882	2.0814924584580194	1.277471692480094	0.9775621119287201	0.2999095805513739	72.58891821660423	99.0	2.0103586738061137	26.12001668708924	glucose
1.4642560383497416	1.7066864829910584	1.4427210128734913	0.7398217689255504	0.702899243947941	56.51522380011177	69.0	1.7282215084673087	21.479370504721533	glucose
1.3540124199370918	1.6844689245935092	1.3669542034339124	0.8207261908387193	0.5462280125951929	59.171117516608575	93.0	1.6715271410966885	25.253113564268286	glucose
2.1748975978210296	1.885065923610326	1.7953982954895271	0.908118353235774	0.8872799422537532	59.96540064643844	63.0	2.2645652259418285	25.349579255373484	glucose
1.6862741251020141	1.7641338141845906	1.75880988469891	0.908118353235774	0.850691531463136	49.37421296660194	48.0	1.6915980545876947	25.349579255373484	glucose
1.6556695182602752	1.849828752308988	1.7917023971291395	0.638735846240047	1.1529665508890925	52.67025280990866	51.0	1.7137958734401237	18.55904473581828	glucose
1.3520512455695486	1.9313799200122688	1.4104004148704554	0.879404942349455	0.5309954725210004	49.216659182743136	60.0	1.873030750711362	25.942678847723293	glucose
1.7278957427814265	1.494384515790513	1.7278957427814265	0.879404942349455	0.8484908004319716	56.72554734489117	51.0	1.494384515790513	25.942678847723293	glucose
1.600702996071849	1.4404689669256237	1.7670604166855224	0.8976991477447636	0.8693612689407587	55.08024845104363	63.0	1.2741115463119503	33.45996304340046	glucose
2.1103828277804784	2.489094937803891	1.851543713009275	0.914706124957052	0.9368375880522231	61.389793755238486	75.0	2.7479340525750944	35.425285415754054	glucose
1.4938899312535818	1.8294335360618537	1.4938899312535818	0.914706124957052	0.5791838062965298	52.01322088185076	60.0	1.8294335360618537	35.425285415754054	glucose
1.3516381355669644	1.9817103315767797	1.3516381355669644	0.8835302083427612	0.46810792722420336	52.984681501681436	69.0	1.9817103315767797	24.62619993956691	glucose
1.321188328234267	2.2451015597743096	1.321188328234267	0.8835302083427612	0.4376581198915059	56.54103522317379	81.0	2.2451015597743096	24.62619993956691	glucose
1.5515284040211634	1.719518930543129	1.3864391794245428	0.7052002074352277	0.6812389719893152	47.395015330195676	63.0	1.8846081551397498	20.80078839337767	glucose
1.621915573640365	2.1641370694695423	1.4738541767210436	0.7469449656267909	0.7269092110942528	53.96584588854772	75.0	2.312198466388864	22.982922019285873	glucose
1.47233474287119	1.8639520511849033	1.5339712399776908	0.7469449656267909	0.7870262743508999	45.75737615423049	60.0	1.8023155540784024	22.982922019285873	glucose
2.528051183752871	1.702729228473876	1.9414435693226881	0.9257718565046374	1.0156717128180506	64.61181920811725	63.0	2.289336842904059	32.46742811969967	glucose
1.954453503296852	1.9065587927900098	1.6389700418023596	0.9257718565046374	0.713198185297722	54.97784218642856	84.0	2.222042254284502	32.46742811969967	glucose
2.1389217099778057	1.6624173728795428	2.1389217099778057	0.9707217846613441	1.1681999253164614	72.32191553499891	60.0	1.6624173728795428	38.89309513465955	glucose
1.795172816977637	1.753836472983596	1.9835180710470715	0.9707217846613441	1.0127962863857274	64.0703844905	69.0	1.5654912189141617	38.89309513465955	glucose
1.9719437917452534	1.6078834193909999	1.5385534029374435	0.8194850209011798	0.7190683820362637	59.28360820754666	69.0	2.0412738081988095	30.068515435336185	glucose
1.8257573191026109	1.8304853315620742	1.4814470703920783	0.8194850209011798	0.6619620494908985	47.91056029819351	69.0	2.1747955802726064	30.068515435336185	glucose
1.758308448268863	2.5356839893313627	1.4002267786842706	0.7692767014687217	0.630950077215549	48.908051083425136	84.0	2.893765658915955	30.33759679608082	glucose
2.075740189372973	1.6425152840532173	1.846798567508961	1.0694608549889029	0.7773377125200582	107.01545543153401	93.0	1.8714569059172292	32.90648784581239	glucose
1.4191865644619068	1.9297289967180444	1.794454467024004	1.0694608549889029	0.724993612035101	60.55078231743216	81.0	1.5544610941559474	32.90648784581239	glucose
1.7891890600825224	1.4659457576595623	1.7178366368798583	0.9917590355235357	0.7260776013563226	86.86472667495678	78.0	1.5372981808622264	27.61804333811749	glucose
1.5834357166498603	2.4276981065912056	1.7178366368798583	0.9917590355235357	0.7260776013563226	55.93042193330848	78.0	2.2932971863612073	27.61804333811749	glucose
1.5310188095173674	2.830038567606519	1.5105337633289768	0.897227233512002	0.613306529816975	47.676247629167094	81.0	2.85052361379491	21.833639453260105	glucose
1.461029677856139	2.293561537934771	1.5633097096938862	0.897227233512002	0.6660824761818843	57.28258645883798	84.0	2.1912815060970234	21.833639453260105	glucose
1.548352858166546	2.4297248890974528	1.675020850028921	0.8589183184399292	0.8161025315889919	52.88917459386603	66.0	2.3030568972350776	27.525985539731114	glucose
1.9436754940486831	2.105747906955884	1.7201001457688843	0.9233992837544805	0.7967008620144036	175.64914973516153	198.0	2.329323255235683	31.93446445189189	glucose
1.4154805522055354	2.619093051219278	1.5308071649375259	0.9233992837544805	0.6074078811830453	87.35217982930683	162.0	2.503766438487287	31.93446445189189	glucose
2.1962542186672716	2.137671611463494	1.3495789763244166	0.7552668816644884	0.5943120946599281	48.94815482236983	81.0	2.984346853806349	23.55413553103642	glucose
2.1002409438949705	1.7302644540444083	1.4725924756321886	0.7552668816644884	0.7173255939677002	48.444029223840765	69.0	2.3579129223071904	23.55413553103642	glucose
1.8772163316001702	1.5146709580111146	1.4560423155594187	0.7816548548469431	0.6743874607124757	49.20952433124619	63.0	1.9358449740518662	22.477379659325212	glucose
2.1014971080072753	1.825817298978973	1.6095407447867296	0.6747894881622083	0.9347512566245213	49.88218777188672	66.0	2.3177736621995186	33.788526441034946	glucose
2.1728473235741563	2.3596854940828824	1.4784345967391115	0.6747894881622083	0.8036451085769032	45.251826717623516	75.0	3.0540982209179273	33.788526441034946	glucose
2.077125418665665	1.9563265800766767	1.2531347321033308	0.7654035824687629	0.4877311496345679	53.2677822476132	111.0	2.7803172666390106	21.776623880085157	glucose
2.200528852130085	2.1829503105303916	1.314240223811437	0.7654035824687629	0.548836641342674	51.29617888973886	105.0	3.0692389388490398	21.776623880085157	glucose
1.744828193514755	2.122585037588008	1.5291106934948497	0.8047703723933648	0.724340321101485	41.80150784252101	66.0	2.3383025376079134	32.330724738573466	glucose
1.8965667124864232	2.184404231724979	1.262413409447421	0.6265673660516654	0.6358460433957558	46.13204014361481	87.0	2.818557534763981	31.95577567177946	glucose
1.896373770722331	1.7966223367831482	1.3126694376170123	0.6265673660516654	0.686102071565347	43.679548622729705	75.0	2.3803266698884666	31.95577567177946	glucose
2.148655287216002	1.3538295619321081	1.3474854822564952	0.6571201119057185	0.6903653703507768	42.55652581593921	66.0	2.154999366891615	33.854290032770535	glucose
2.310660773408133	2.225933920571945	1.6753290304224289	0.8600500728844421	0.8152789575379867	67.8102419633587	114.0	2.861265663557649	29.902699908441278	glucose
1.9139921256232744	2.197878300972341	1.5420910522944276	0.8600500728844421	0.6820409794099854	57.10608607752006	132.0	2.569779374301188	29.902699908441278	glucose
1.9444091839352025	1.3523180105194732	1.3600275883788122	0.6312067047237105	0.7288208836551017	51.20108188002664	66.0	1.9366996060758634	29.177949422868046	glucose
1.9227351318469168	1.6220183371404775	1.3600275883788122	0.6312067047237105	0.7288208836551017	47.5907059174233	69.0	2.184725880608582	29.177949422868046	glucose
1.988606611535988	2.0151309527695167	1.2348377821046137	0.7710455261472138	0.4637922559573999	50.51558067878121	93.0	2.768899782200891	29.446032701896527	glucose
1.9007418427719218	2.0532429018394964	1.2348377821046137	0.7710455261472138	0.4637922559573999	53.93923406357038	99.0	2.7191469625068043	29.446032701896527	glucose
2.4323133952660965	1.846814700665718	1.6188368821650347	0.8376645152112144	0.7811723669538203	73.62073940345691	93.0	2.66029121376678	35.548627283202045	glucose
2.025022528018708	1.9169300123776578	1.5225350226578473	0.8376645152112144	0.6848705074466329	62.436753573508824	99.0	2.419417517738519	35.548627283202045	glucose
1.8577405452009073	1.4814435930375387	1.3263589238182463	0.6174188910523069	0.7089400327659393	49.64852240622276	72.0	2.0128252144201997	30.59394786978443	glucose
2.1074312269326176	1.5685684024541469	1.3820969800903888	0.6174188910523069	0.7646780890380821	48.58898402863484	66.0	2.293902649296376	30.59394786978443	glucose
2.4604492666450994	1.3593757986251087	1.6592972810946387	0.8094184410825174	0.8498788400121212	108.73251292483413	96.0	2.1605277841755695	37.420206081016865	glucose
1.992695111536213	1.645863500258363	1.7557301907526777	0.8094184410825174	0.9463117496701604	96.70221721023736	105.0	1.8828284210418984	37.420206081016865	glucose
1.8501199532979131	1.7568538207416238	1.6686337080691933	0.7612675113289237	0.9073661967402696	52.950147473747066	66.0	1.9383400659703436	31.154192738749355	glucose
1.893616370486635	1.8690036490556965	1.5099716127224698	0.7612675113289237	0.7487041013935463	48.45579859597187	72.0	2.2526484068198616	31.154192738749355	glucose
1.8277817296196255	1.7264663485564342	1.6540482466720081	0.7549858063612349	0.8990624403107732	46.90184226858467	54.0	1.9001998315040516	29.13255954594823	glucose
1.657986005301052	1.9480838892854295	1.5413138595756217	0.8343168540345967	0.7069970055410252	50.8476603535968	69.0	2.06475603501086	28.46338389689097	glucose
1.8396724033249712	2.1907832186785354	1.4819570164506475	0.8343168540345967	0.6476401624160509	53.027234046642164	75.0	2.548498605552859	28.46338389689097	glucose
2.0727243971636753	2.097193753303503	1.7028633983518862	0.8296486405473193	0.8732147578045669	77.34329611175588	96.0	2.467054752115292	37.853065640693835	glucose
1.5377773858092516	1.933582750607924	1.7692574514271235	0.8296486405473193	0.9396088108798042	63.84856812965505	87.0	1.702102684990052	37.853065640693835	glucose
1.561525166106863	1.852623352049985	1.4672719745602611	0.8778650953763388	0.5894068791839222	58.48108681130028	96.0	1.946876543596587	30.656847869787892	glucose
1.5406182251969698	2.427633396108113	1.531751710030031	0.8778650953763388	0.6538866146536921	57.14310369158493	102.0	2.436499911275052	30.656847869787892	glucose
1.7559461817974162	2.2391412852756893	1.474851980979965	0.8846287257135618	0.5902232552664032	55.65025180646707	81.0	2.5202354860931404	23.658113627834638	glucose
1.4556139304945463	1.9193289623597871	1.626227047847252	0.8846287257135618	0.7415983221336901	49.45454409693566	66.0	1.7487158450070814	23.658113627834638	glucose
2.319307751646174	1.4781660762890434	1.822701778269071	0.8514316991759431	0.971270079093128	80.12980959605166	72.0	1.9747720496661463	31.888067648671925	glucose
1.770206575162976	2.096672853407025	1.8723714087231957	0.8514316991759431	1.0209397095472525	61.210799925714475	81.0	1.9945080198468055	31.888067648671925	glucose
1.6251401703382196	1.928756230398725	1.330930617495835	0.7336359872801306	0.5972946302157045	45.17922325202726	72.0	2.2229657832411096	24.023464093951738	glucose
1.8527346981425123	2.905654509117581	1.802702740733133	0.9113508891345355	0.8913518515985976	63.93218330593818	93.0	2.9556864665269607	35.68165771763344	glucose
1.7121897474211942	1.9618370895269162	1.7565227606014364	0.9113508891345355	0.8451718714669008	103.49339480806162	123.0	1.917504076346674	35.68165771763344	glucose
1.7147760237677543	1.8412903530287454	1.3747277823304493	0.7374259904899825	0.637301791840467	57.02001414672821	90.0	2.1813385944660504	27.01455664303717	glucose
1.8433176753568858	1.2607387331367623	1.5242431565907417	0.9361857043615979	0.5880574522291439	83.79330423346603	84.0	1.5798132519029064	27.233947310199632	glucose
1.8097803893431894	1.5687956554259557	1.4733315368987505	0.9361857043615979	0.5371458325371526	73.28442121406131	90.0	1.9052445078703946	27.233947310199632	glucose
1.4205215528734236	1.9911900803548777	1.5849420527654394	0.7621215782953709	0.8228204744700685	56.95864607963821	63.0	1.8267695804628619	28.358733467029012	glucose
2.6556364316666596	1.280425127250711	1.775408207995555	0.9013513703665665	0.8740568376289886	63.41431828574285	63.0	2.1606533509218155	28.503610740654036	glucose
2.0942207008831986	1.2155856999831278	1.5089313351141818	0.9013513703665665	0.6075799647476152	54.517919456462295	78.0	1.8008750657521446	28.503610740654036	glucose
1.7959257940270263	2.527133788131193	1.5642415463721517	0.8782613803007182	0.6859801660714335	54.445387810165585	93.0	2.758818035786067	26.341380729556832	glucose
2.0853008748180573	1.8996563821408379	1.6165355295464152	0.8877041039977775	0.7288314255486377	80.27325497044492	93.0	2.36842172741248	40.85594510256399	glucose
1.745835113111899	1.6281192193181044	1.7836456145310622	0.8877041039977775	0.8959415105332845	56.8108211840041	63.0	1.5903087178989412	40.85594510256399	glucose
1.595199490972518	1.9765440668737646	1.6547296926861057	0.7544656675570909	0.9002640251290148	56.75507268692228	63.0	1.917013865160177	32.21878001358767	glucose
1.4265934087600187	2.0019730979266366	1.5994526624547525	0.7544656675570909	0.8449869948976616	54.54410519129635	60.0	1.8291138442319028	32.21878001358767	glucose
1.5579426065292865	2.050223730910518	1.618565661894078	0.8918228072655311	0.7267428546285469	54.47235524623761	63.0	1.9896006755457263	26.85900174018306	glucose
1.6381813399441998	1.7842175979045063	1.6381813399441998	0.8918228072655311	0.7463585326786688	50.803787722649744	54.0	1.7842175979045063	26.85900174018306	glucose
1.7636923277355743	1.79490156392973	1.542417854864602	0.8273648463430529	0.7150530085215491	47.39765199315874	60.0	2.0161760368007027	24.54153063034643	glucose
2.239390761787061	1.6368875007702242	1.619541534564835	0.8082677647732076	0.8112737697916272	87.1689958072843	93.0	2.2567367279924504	32.0815519202778	glucose
1.6577573223597992	1.605568555384467	1.7056600821797885	0.8082677647732076	0.897392317406581	64.47583671081125	81.0	1.5576657955644777	32.0815519202778	glucose
1.658708805228548	2.0521144457920597	1.4527687543253158	0.8190906699720999	0.6336780843532158	43.90198614432451	63.0	2.2580544966952916	25.20278984529538	glucose
1.6246871689270754	1.8836012659902195	1.54860651774271	0.809282830947039	0.7393236867956711	43.21967068519777	60.0	1.959681917174585	23.96834779275825	glucose
1.7971235110460935	1.7808571637263668	1.54860651774271	0.809282830947039	0.7393236867956711	51.33594081952528	63.0	2.0293741570297503	23.96834779275825	glucose
1.4122243700004204	1.9786292259714486	1.4502108033376537	0.8528300410898942	0.5973807622477594	78.3426693590257	96.0	1.9406427926342154	25.503958805535373	glucose
1.5139345410541185	2.274910742534467	1.564356247893913	0.8528300410898942	0.7115262068040187	63.47021587043926	81.0	2.2244890356946723	25.503958805535373	glucose
2.161856688356386	2.6538975665068487	1.804281472962953	0.8097707672824175	0.9945107056805356	192.12613684579355	231.0	3.011472781900282	34.452165565954786	glucose
1.5080207240414076	1.4799984622359645	1.6796686992897496	0.8097707672824175	0.8698979320073322	60.819040484321185	78.0	1.3083504869876226	34.452165565954786	glucose
1.5132882068666327	2.405552832685891	1.6717446799965263	0.774303258871355	0.8974414211251714	45.89360494272335	66.0	2.2470963595559974	24.9951872142627	glucose
1.523079097854826	1.8348551884771358	1.581511832118568	0.8398343496448748	0.741677482473693	55.234904251206345	60.0	1.776422454213394	23.20031883140627	glucose
1.442111171379238	1.7395068694573914	1.3483634615546929	0.8398343496448748	0.5085291119098181	55.186755095758514	72.0	1.8332545792819366	23.20031883140627	glucose
1.8932742909100213	2.2816822537315318	1.2661269826673305	0.7251054016688269	0.5410215809985036	52.59108646328626	93.0	2.9088295619742226	21.726528769237238	glucose
1.5727256912060177	1.9299005892007346	1.5571922100891171	0.790755916059284	0.7664362940298333	54.537427305720136	69.0	1.9454340703176352	23.431986120843476	glucose
1.6042129569034103	1.944918379648997	1.5571922100891171	0.790755916059284	0.7664362940298333	44.51814505575432	57.0	1.9919391264632902	23.431986120843476	glucose
1.5163419456868752	1.8859109331589128	1.3682360706635361	0.6741817307773464	0.6940543398861897	54.035729288034986	75.0	2.034016808182252	22.186325713526738	glucose
1.3752841020370816	1.9105329536156357	1.2219917628335393	0.6741817307773464	0.5478100320561928	47.75083687346047	81.0	2.0638252928191783	22.186325713526738	glucose
1.68953778308147	1.8406818137646175	1.4721380356864573	0.7785961050445586	0.6935419306418986	45.14972855758679	60.0	2.0580815611596304	24.68019933697554	glucose
1.7547512864466166	1.709230600164793	1.5425328410721162	0.7785961050445586	0.7639367360275576	45.863853725362304	54.0	1.9214490455392934	24.68019933697554	glucose
1.6074740600994024	1.8861806502588954	1.4473326946001028	0.7785961050445586	0.6687365895555442	50.895512252223796	72.0	2.0463220157581947	24.195779864707962	glucose
1.7219238891720323	1.5866047586006218	1.6857948374454472	0.7785961050445586	0.9071987324008888	50.94630662789454	51.0	1.6227338103272069	24.195779864707962	glucose
2.8116010976446755	3.1473963858821423	1.528315737184306	0.9021407364814765	0.6261750007028295	83.05052208690377	216.0	4.430681746342512	33.25933366702132	glucose
2.009881746480167	1.6480877730632293	1.5617592840910342	0.9021407364814765	0.6596185476095577	93.75733213796492	201.0	2.096210235452362	33.25933366702132	glucose
1.7079410512790472	1.571423120263907	1.2597894920282375	0.7236663473000514	0.5361231447281862	47.81344142906527	69.0	2.019574679514717	24.73037015537542	glucose
1.6691014757977838	2.0750046161353595	1.3670549829620513	0.7236663473000514	0.643388635662	43.756179872778695	69.0	2.377051108971092	24.73037015537542	glucose
1.484404604229864	1.97134016226456	1.377870852241665	0.6298947460141188	0.7479761062275462	46.75533225614421	69.0	2.077873914252759	26.2760161735238	glucose
1.3557860473543029	2.449134676069467	1.377870852241665	0.6298947460141188	0.7479761062275462	36.272360299255666	66.0	2.427049871182105	26.2760161735238	glucose
1.7379935736194345	1.6277920586726098	1.3407851623516291	0.7808796420455171	0.5599055203061121	84.9483530402002	123.0	2.025000469940415	30.921257638156412	glucose
2.480877212858493	1.672442902585905	2.480877212858493	0.764157868592153	1.7167193442663398	80.70865012984567	60.0	1.672442902585905	43.25540150222577	glucose
3.1880378629089683	2.479353537273648	1.6336823163675298	0.764157868592153	0.8695244477753769	57.83020511557419	120.0	4.033709083815086	43.25540150222577	glucose
2.7511165542459604	3.8890192686543466		0.8168411581837649		61.35956321439039			49.04673635244566	glucose
2.6451507954284903	1.82269281364188		0.8168411581837649		47.60464552162269			49.04673635244566	glucose
2.353567234940593	1.8755223663709488	2.511924837699947	1.2404386064292465	1.2714862312707005	63.8676805867407	48.0	1.7171647636115952	38.167341736284506	glucose
1.6702916999600659	1.6451014716517316	1.7316614635826948	1.2404386064292465	0.49122285715344827	57.62931837137096	54.0	1.5837317080291027	38.167341736284506	glucose
2.314604715791532	2.633621186585149	2.399881614481297	1.2559624188499734	1.1439191956313235	57.47412014655099	60.0	2.5483442878953837	36.20872669139374	glucose
1.7302684399605008	1.891500834209954	1.981238962625317	1.2559624188499734	0.7252765437753436	50.67097939035045	60.0	1.6405303115451377	36.20872669139374	glucose
1.6526875506166059	2.01155035228565	1.6526875506166059	0.8658307317913474	0.7868568188252586	57.45629625660176	66.0	2.01155035228565	25.696795384001014	glucose
1.4370467752426928	1.8425475023006088	1.548988187508419	0.8658307317913474	0.6831574557170715	55.44306741778921	60.0	1.7306060900348825	25.696795384001014	glucose
1.926466607881865	2.0717387986545486	1.4749511852556427	0.9906194813126585	0.48433170394298425	51.262801564077854	69.0	2.5232542212807707	26.61951446093078	glucose
1.636375803395705	2.067613382785397	1.4156471526993735	0.9906194813126585	0.42502767138671504	45.81801277477842	72.0	2.288342033481728	26.61951446093078	glucose
2.9312642714052095	1.8823154755859393	1.9913225544951896	1.1999408072406486	0.7913817472545411	71.27014507121227	69.0	2.822257192495959	35.609303319869724	glucose
2.187895889129952	2.480945451640565	2.064688780088599	1.1999408072406486	0.8647479728479506	43.89492575058924	63.0	2.6041525606819182	35.609303319869724	glucose
2.328104802192471	1.72556495333775	1.524101829428305	1.0323443900442995	0.4917574393840056	52.49523895298016	69.0	2.5295679261019157	33.659936755845415	glucose
2.1842760586309073	1.6496024018331426	1.6755669764374341	1.0323443900442995	0.6432225863931347	48.05030348557494	60.0	2.1583114840266155	33.659936755845415	glucose
2.7609480203392436	2.81034184182483	2.020272668492295	0.9956612772475948	1.0246113912447004	62.20086497508741	81.0	3.5510171936717785	45.096373406233994	glucose
1.9725250176463363	1.9063010302601022	1.962179002465353	0.9956612772475948	0.9665177252177581	52.27678309724721	72.0	1.9166470454410856	45.096373406233994	glucose
1.9869550268616565	2.2608894947502196	1.7298373597398744	0.7620509147141525	0.9677864450257219	43.78875873588711	60.0	2.518007161872002	35.816996956807245	glucose
1.8404231934080875	1.553803388534629	1.3557943952260332	0.9810895012326765	0.37470489399335677	50.96001115945394	72.0	2.0384321867166832	30.346538733020555	glucose
1.750254680338784	1.4441771339989429	1.4108115222954132	0.9810895012326765	0.42972202106273677	55.29989079168803	72.0	1.7836202920423136	30.346538733020555	glucose
3.1012039607487436	1.5202663613608154	1.9940519180029792	1.0101363342461476	0.9839155837568316	62.55174572338486	66.0	2.62741840410658	42.47612338983451	glucose
2.3547158145306923	1.2987890412269292	2.204414458031277	1.0101363342461476	1.1942781237851294	56.80669046575778	57.0	1.4490903977263447	42.47612338983451	glucose
1.551766563401713	2.2253348063827403	1.629255862892151	0.6778971976130166	0.9513586652791344	46.751985367472976	63.0	2.1478455068923026	28.314202975509037	glucose
2.665445605369753	2.0067908812705872	1.9568734460378048	0.9970259590014896	0.9598474870363153	88.91780828943502	87.0	2.7153630406025355	47.71083016536529	glucose
1.8763246563717852	1.7463203951921207	2.023020234345552	0.9970259590014896	1.0259942753440625	53.73319365168989	63.0	1.5996248172183538	47.71083016536529	glucose
1.8031521849798156	1.4731701299281232	1.63676713494328	1.1022072290156384	0.5345599059276416	55.71314330771695	57.0	1.6395551799646588	36.226397146626034	glucose
1.734127684568372	1.4293168150464866	1.4138277450929302	1.1022072290156384	0.3116205160772917	58.80412091240116	72.0	1.7496167545219283	36.226397146626034	glucose
1.4238853783647127	1.7895561007591372	1.4109709256200649	0.81838356747164	0.5925873581484249	51.0948700680884	72.0	1.802470553503785	27.740802845843316	glucose
1.7239245138198744	1.5637343335050802	1.6127795210719327	1.011510117172776	0.6012694038991565	57.97947969876714	63.0	1.674879326253022	28.86653317495054	glucose
1.4775212903628654	1.9428362551444482	1.381488528328083	1.011510117172776	0.36997841115530705	47.06977343064975	78.0	2.0388690171792305	28.86653317495054	glucose
2.945213072725606	2.69679942911504	1.9833511612744132	0.9784367230189024	1.0049144382555109	121.55619406687208	135.0	3.6586613405662325	41.00685546722697	glucose
1.7533505413119328	1.3041085385140039	1.8489716011101538	0.9784367230189024	0.8705348780912513	78.53219759666881	93.0	1.2084874787157829	41.00685546722697	glucose
1.5992000648117375	1.2772072436198294	1.4241398490534425	0.8063897605359663	0.6177500885174763	63.760634470569876	66.0	1.4522674593781244	26.521915597228837	glucose
1.531709775901432	1.9001052639892129	1.3739679773478652	0.8063897605359663	0.5675782168118989	48.97627409507592	72.0	2.0578470625427796	26.521915597228837	glucose
1.2897704603279347	1.7482553155835214	1.1730985933569142	0.9244858005550769	0.24861279280183746	63.10578635199519	108.0	1.864927182554542	26.974623712491272	glucose
1.4485529423802468	1.5969066168641854	1.1125903411154316	0.9244858005550769	0.18810454056035472	72.75796789947383	114.0	1.9328692181290006	26.974623712491272	glucose
1.3442178503412965	2.3803899054838817	1.3920557648228042	0.7120699245267212	0.679985840296083	44.888140771601584	69.0	2.332551991002374	24.603077920180574	glucose
1.827712544708945	1.2942557342982197				58.25870993754869				glucose
1.6889603475060566	1.416324434751322				51.21842225581893				glucose
3.3034252099744856	1.4319668211023302				63.52002752756026				glucose
2.1922174457732417	0.9479289388026357				52.079223571914376				glucose
2.138984595560113	1.0866143738546121				45.558779155252196				glucose
2.0314302328556852	1.8323417089207763				42.047877202791			50.821926307299776	glucose
2.3344920076983584	1.4824950243339763				46.523061257127246			50.821926307299776	glucose
1.479031521118167	1.7255195902396976				56.478461377524596				glucose
1.3862058653531106	2.0657311291533347				47.86271680309688				glucose
1.449855156956549	1.5824731577348166				50.7272224075256			25.984005346247024	glucose
1.4189997416001454	2.1860168157616373				46.83556755692072			25.984005346247024	glucose
1.7145435520530419	1.8580631028923733				39.65434515487735			31.252772813164384	glucose
1.415530755789387	2.0363623296786106				53.6528790808573			22.305463953177675	glucose
1.396893267590891	1.7145218769720676				51.93235496972112			22.305463953177675	glucose
1.6945236216197193	1.4998150174049079				62.319770396776306			22.754331094125646	glucose
1.4190471364854906	1.6997529769231463				50.17302741037351			22.754331094125646	glucose
1.6755989187303648	1.9047769855803123				52.0341611503175			21.326244082355547	glucose
1.478273507156071	2.149205193626374				50.96312882661087			21.326244082355547	glucose
1.555992433572351	2.265507939124203				55.54252165418299			26.06959417876491	glucose
1.3386556146500697	2.1195265858308456				48.20230861969965			26.06959417876491	glucose
1.4683415148905352	1.8416933205354593				56.282353885439946			21.831494407469087	glucose
1.3156911416425119	1.7490360573674144				63.9376857671209			21.831494407469087	glucose
1.5216737696109177	1.6535035424010334				50.886841501356265			25.778444903544074	glucose
1.631612325108247	1.6324614485648201	1.2784095595817426			44.98311537434971	66.0	1.9856642140913245	20.594701763847226	glucose
1.6624282381005326	1.9002588026517115	1.3936086341323197			49.10547590662956	69.0	2.1690784066199242	20.594701763847226	glucose
2.076500218507778	1.9643670342901323	1.4702387665881402			56.22007835609938	75.0	2.57062848620977	23.938345131882322	glucose
1.801941513967736	1.4882333275549218	1.3641715909591832			51.80678669707647	72.0	1.9260032505634745	23.938345131882322	glucose
1.500142948978378	1.6380184474015222	1.4879131150697193	0.6392047797908713	0.8487083352788479	47.89543827032158	57.0	1.6502482813101809	25.101728078588415	glucose
1.5099704667389908	2.0275841580955607	1.5181867962177285	0.6820857954795916	0.8361010007381369	58.62084243861183	78.0	2.019367828616823	27.72217713796517	glucose
1.511076899713989	1.595488648630224	1.4010751763837401	0.6820857954795916	0.7189893809041484	51.93589044149882	66.0	1.7054903719604728	27.72217713796517	glucose
2.073235071969228	2.0693707946654105	1.8082320148800777	0.7351193832940701	1.0731126315860078	60.08081696885981	69.0	2.3343738517545605	31.946157207811964	glucose
1.8304392153017366	2.651248012630603	1.9470679587549233	0.7351193832940701	1.2119485754608534	51.0894396323404	69.0	2.5346192691774165	31.946157207811964	glucose
2.2123961025547447	2.1488695730851384	1.7421572516403323	0.9041160074400388	0.8380412442002936	61.278441572590424	75.0	2.619108423999551	31.89592418414197	glucose
1.7684665549794307	1.9958874000872833	1.8670238244949726	0.9041160074400388	0.9629078170549338	55.05075273828067	69.0	1.8973301305717414	31.89592418414197	glucose
2.1492545444977478	2.052408806527883	1.7553012697271067	0.9735339793774617	0.7817672903496449	46.529700327407	63.0	2.446362081298524	28.16060331233441	glucose
2.1254356889478956	1.9446344873625332	1.8282194034463748	0.9735339793774617	0.8546854240689131	44.80979540305486	57.0	2.241850772864054	28.16060331233441	glucose
2.1325654139990906	1.4373621729097317	1.4051128891327511	0.8776506348635533	0.5274622542691978	52.46838065808487	66.0	2.1648146977760714	33.06545453073458	glucose
2.121053273423599	2.023344480611417	1.778925047816783	0.8710786258201662	0.9078464219966168	62.08727394235601	78.0	2.3654727062182332	34.03686311622684	glucose
2.10140833644132	1.992062874386685	1.840327573173337	0.8710786258201662	0.9692489473531709	59.253516616238315	72.0	2.253143637654668	34.03686311622684	glucose
1.9923399576779888	1.579144134817378	1.5004874812389206	0.9335119122474863	0.5669755689914343	46.31499731484245	57.0	2.0709966112564464	27.207177768914317	glucose
1.9088650648002836	2.0507408832131064	1.444866415094602	0.9335119122474863	0.5113545028471157	54.14947733367305	78.0	2.514739532918788	27.207177768914317	glucose
1.5730891995933591	2.143882939236965	1.5607096746321354	0.7502437406194603	0.8104659340126751	48.366525577452634	69.0	2.156262464198189	30.65138396427675	glucose
1.9491146544440061	1.599329739862169	1.5457269560115974	0.9201637865866685	0.625563169424929	55.531919726454305	72.0	2.002717438294578	32.32935902217415	glucose
2.0527253077037977	1.4507131567298304	1.5457269560115974	0.9201637865866685	0.625563169424929	62.238164110840415	72.0	1.9577115084220307	32.32935902217415	glucose
2.2910992555541116	1.598197340564476	1.6391284391534995	0.8894625239083915	0.7496659152451081	70.72975976444587	75.0	2.2501681569650884	32.63158882190152	glucose
1.8454447714292717	1.5291331195831477	1.5851395164903885	0.8894625239083915	0.6956769925819971	51.68026962487188	69.0	1.7894383745220308	32.63158882190152	glucose
1.4999270519728984	2.023731754834902	1.4364523364573993	0.7925697582451943	0.643882578212205	48.69410928016609	72.0	2.087206470350401	28.391458021988793	glucose
1.4723554574130535	1.9593268050477541	1.4364523364573993	0.7925697582451943	0.643882578212205	54.06335372654125	78.0	1.9952299260034083	28.391458021988793	glucose
1.662527766474838	1.6874879805069043	1.527417823325038	0.7728634780057987	0.7545543453192392	50.455612135105284	63.0	1.8225979236567043	29.986379299138555	glucose
1.700799873357946	1.8465134433274502	1.471279946074598	0.7728634780057987	0.6984164680687993	48.089917170266006	66.0	2.076033370610798	29.986379299138555	glucose
1.9659844795138242	2.399487910805954	1.7288939947193094	0.8195642195767497	0.9093297751425597	57.347129862452846	78.0	2.6365783956004685	35.24768085467864	glucose
1.6943827175572568	1.74205561865005	1.780477711002614	0.8195642195767497	0.9609134914258642	79.39975413226779	90.0	1.6559606252046928	35.24768085467864	glucose
1.742321874752708	1.8599276890740586	1.3635992078825454	0.7182261682286997	0.6453730396538458	51.532275763008855	72.0	2.2386503559442215	23.075800799583053	glucose
1.4627080437372866	2.479938627746214	1.423091831576329	0.7182261682286997	0.7048656633476293	41.94271410846818	75.0	2.519554839907171	23.075800799583053	glucose
2.3259427480281802	1.477906322960489	1.7559598030795067	0.8644469973596547	0.8915128057198519	63.41203967880665	63.0	2.0478892679091625	30.24591506944345	glucose
2.1869909796423355	1.2807700566605642	1.6331234311200573	0.8644469973596547	0.7686764337604026	72.17424134034547	72.0	1.8346376051828424	30.24591506944345	glucose
1.6364083590203635	1.5858165809113678	1.5473291295741556	0.890238855501307	0.6570902740728487	58.31056501482496	69.0	1.6748958103575757	26.067426423957794	glucose
1.7216289682405133	2.2440921782132905	1.5073313678425102	0.890238855501307	0.6170925123412032	62.30224341018295	90.0	2.458389778611294	26.067426423957794	glucose
1.7944976166318998	2.4573913604642295	1.8451344429486218	0.8779799015397534	0.9671545414088684	74.72737047736052	90.0	2.406754534147508	35.783734585048926	glucose
1.349460673308732	2.104954730143554	1.349460673308732	0.8779799015397534	0.47148077176897873	53.095048736147234	72.0	2.104954730143554	35.783734585048926	glucose
1.481280766012681	2.168506618541251	1.684637761360214	0.8165617155600287	0.8680760458001852	48.42550599315318	66.0	1.9651496231937182	33.64601507142054	glucose
1.6042209026503556	1.8737024380561151	1.684637761360214	0.8165617155600287	0.8680760458001852	77.93231642779756	90.0	1.7932855793462568	33.64601507142054	glucose
1.6489787527597362	2.5875876267981734	1.4722863601126428	0.842318880680107	0.6299674794325357	41.87104314293283	72.0	2.7642800194452666	22.78893486173355	glucose
1.5892440724846937	1.7946167442997503	1.5357402782251268	0.674730336654366	0.8610099415707608	55.02923546594998	69.0	1.8481205385593171	20.760933435518954	glucose
1.7029401621013776	1.9491779872057875	1.5357402782251268	0.674730336654366	0.8610099415707608	51.78495959823147	66.0	2.1163778710820385	20.760933435518954	glucose
2.3462072452291864	1.660254638008721	1.8498063683811798	0.9225672214743109	0.9272391469068689	77.72037879725079	75.0	2.1566555148567277	27.607655640490766	glucose
1.7270646028076435	1.7778371543204308	1.7016525162601015	0.9225672214743109	0.7790852947857907	61.7010717313741	87.0	1.8032492408679728	27.607655640490766	glucose
1.6862864662273598	2.1629559877208604	1.400641606559016	0.7678701391125634	0.6327714674464526	50.38947267831489	75.0	2.448600847389204	24.449908807456826	glucose
1.5393517521334463	3.0106251114528177	1.5687737247697824	0.7678701391125634	0.800903585657219	40.293276866288245	69.0	2.9812031388164817	24.449908807456826	glucose
2.174450838169244	2.117376968121128	2.3130998676450893	0.9249031841905899	1.3881966834544996	67.282326941852	60.0	1.9787279386452825	36.095496080449024	glucose
1.5713486375359935	1.6060129811519304	1.5713486375359935	0.9249031841905899	0.6464454533454036	70.8782813930426	72.0	1.6060129811519304	36.095496080449024	glucose
1.7151446065463016	1.774220863664815	1.48068668522054	0.8508262581300507	0.6298604270904892	64.41321312298446	81.0	2.0086787849905763	26.57022465857913	glucose
1.5860602479065786	1.9145066779941327	1.3841721222747023	0.8508262581300507	0.5333458641446516	63.03950129724586	93.0	2.116394803626009	26.57022465857913	glucose
2.333970390567252	2.0597080033821173	1.782698593723041	1.1565499338225447	0.6261486599004963	65.74312094028056	78.0	2.6109798002263283	33.45308981798837	glucose
2.0109874585812637	1.6129072589270956	1.8963684111909567	1.1565499338225447	0.7398184773684119	60.02563744414372	63.0	1.7275263063174027	33.45308981798837	glucose
1.389093457183426	2.4958831659019562	1.389093457183426	0.7856743187679968	0.603419138415429	54.590956142514244	81.0	2.4958831659019562	24.17459442363067	glucose
1.7947885326013346	1.8319727504429104	1.421772396211238	0.9481842055954783	0.47358819061575985	56.16494424470459	78.0	2.204988886833007	30.938268593557904	glucose
1.7068998471978662	1.5273626254826438	1.421772396211238	0.9481842055954783	0.47358819061575985	48.80385263429481	66.0	1.812490076469272	30.938268593557904	glucose
2.5158726350361076	1.9617195724341028	1.817098174718778	0.8913492968615205	0.9257488778572575	61.32282320177893	69.0	2.6604940327514326	35.90723677795773	glucose
1.8940344580620359	1.785761916351139	1.9979670905631468	0.8913492968615205	1.1066177937016264	56.35782205586284	63.0	1.681829283850028	35.90723677795773	glucose
1.7414851088623622	1.553012229339814	1.6839550010994786	0.710886198105619	0.9730688029938597	52.18864928046583	54.0	1.6105423371026977	27.612131270789764	glucose
2.2888292605932894	2.002387250108812	1.9548222562143327	0.908549087359389	1.0462731688549436	59.55158669010932	66.0	2.336394254487769	38.705732846709346	glucose
2.014714787671172	1.8936015019664714	1.8896460242685078	0.908549087359389	0.9810969369091188	53.34886479235435	66.0	2.0186702653691357	38.705732846709346	glucose
1.6934583921241553	1.6718500913872576	1.4745125989650647	0.9989835452815734	0.47552905368349135	45.41939286194694	63.0	1.8907958845463482	29.13899166249286	glucose
1.6961963311708053	2.2959885871705543	1.5874385486964777	0.9989835452815734	0.5884550034149042	48.58789882509033	72.0	2.404746369644882	29.13899166249286	glucose
1.6089219814880256	2.213698231227887	1.8444885298005667	0.7372562994825324	1.1072322303180344	45.65597415146854	48.0	1.978131682915346	26.05320603267931	glucose
1.6380634736800062	1.9686036624622543	1.6081245027204507	0.9448230121342539	0.6633014905861969	55.32746297837239	78.0	1.9985426334218097	30.995612118018027	glucose
2.1335248795618638	1.512904482699581	1.4875228788522676	0.9448230121342539	0.5426998667180137	69.83551682196716	75.0	2.158906483409177	30.995612118018027	glucose
2.307575107952531	2.079582712087571	2.307575107952531	0.9774111281071663	1.3301639798453646	64.73127354518152	60.0	2.079582712087571	35.212757855281374	glucose
2.0098665836720184	1.4738779932641801	1.9322171230087766	0.9774111281071663	0.9548059949016102	71.83010766867126	66.0	1.551527453927422	35.212757855281374	glucose
1.5660433828768576	1.5611811113882996	1.6921689703938678	0.9661085615043883	0.7260604088894795	81.18196037040607	84.0	1.4350555238712894	30.921024364184895	glucose
1.6156775156369954	2.0802355736899036	1.6156775156369954	0.9661085615043883	0.6495689541326072	52.77303172697134	63.0	2.0802355736899036	30.921024364184895	glucose
2.414065368626656	1.5355133378303774	1.929069077956784	1.1537875539762654	0.7752815239805186	71.80731681910015	63.0	2.0205096285002497	35.501155506962014	glucose
1.8826377091059125	1.6644234034399967	1.8680840352427766	1.1537875539762654	0.7142964812665111	59.089445475328915	69.0	1.6789770773031327	35.501155506962014	glucose
1.4614040385913916	2.32543653653741	1.5516205636543363	0.8040622513602254	0.747558312294111	41.49560086660987	69.0	2.2352200114744654	25.20097651815394	glucose
2.2073458114474316	2.0953197391141622	1.7085901973817186	0.964534538978392	0.7440556584033265	71.65718921875614	84.0	2.5940753531798753	37.13946720964086	glucose
1.6554578461855367	2.043325499229338	1.6598213136273376	0.964534538978392	0.6952867746489455	56.90535622701075	84.0	2.0389620317875368	37.13946720964086	glucose
1.7172702000711586	1.8417533851533447	1.6529959732440853	0.9340420176213883	0.7189539556226969	65.62900310018335	75.0	1.906027611980418	28.963657063167883	glucose
1.6355370338432795	2.2266215826294	1.6529959732440853	0.9340420176213883	0.7189539556226969	62.92134162017669	84.0	2.209162643228594	28.963657063167883	glucose
1.6227427928412075	1.6389117222208096	1.3806023837869705	0.8299106568136688	0.5506917269733018	56.5942404307863	81.0	1.8810521312750466	25.468582249008257	glucose
1.7714722142563841	2.022713992285718	1.5978969152907394	0.8299106568136688	0.7679862584770707	54.60295410910994	72.0	2.1962892912513627	25.468582249008257	glucose
2.2426626869397426	2.314540159873328	1.7056276014255394	0.8542950986908593	0.8513325027346801	58.65469913909326	84.0	2.851575245387531	33.95916632996048	glucose
1.7682146908428342	1.9178214302291339	1.8075489199305694	0.8542950986908593	0.9532538212397103	70.76962160034444	93.0	1.8784872011413987	33.95916632996048	glucose
1.3529177547294295	2.6752869203844174	1.5152818002854866	0.6903011918934853	0.8249806083920013	38.11791885679412	66.0	2.5129228748283605	24.965273736018577	glucose
2.5737660436910046	1.9351119994481074	1.7159103874488004	0.8528138007127697	0.8630965867360307	63.049553330953444	75.0	2.792967655690312	34.502502875996036	glucose
1.965165250403496	1.7761500735953728	1.7159103874488004	0.8528138007127697	0.8630965867360307	54.90394914247223	75.0	2.0254049365500686	34.502502875996036	glucose
1.9163381103705708	2.0593006315516966	1.500384970912008	0.9037744599652847	0.5966105109467233	45.59120934585823	69.0	2.4752537710102596	27.203302936043603	glucose
1.8807081868006885	1.8299900046171071	1.5911996428236346	0.9037744599652847	0.6874251828583499	48.95887679222902	63.0	2.1194985485941613	27.203302936043603	glucose
2.450950645056482	1.879592130213282	1.8496839176772388	0.8579551937244002	0.9917287239528387	69.4100754774628	75.0	2.4808588575925254	39.5964006721693	glucose
2.035743334155536	1.6358487261394767	1.911705615844431	0.8579551937244002	1.0537504221200307	59.94005319673443	66.0	1.759886444450582	39.5964006721693	glucose
1.8879291942911451	2.3666446939591803	1.4904007384459939	0.8579551937244002	0.6324455447215936	53.74463668166164	81.0	2.7641731498043316	30.233311544669167	glucose
1.8525763920343568	1.559914289281562	1.435008632794174	0.8579551937244002	0.5770534390697739	57.86957763931597	72.0	1.9774820485217448	30.233311544669167	glucose
1.6666990837855622	1.5868931325600129	1.4908196503247326	0.9558528079222155	0.5349668424025171	68.39096242091304	84.0	1.7627725660208424	31.319128217777482	glucose
1.533065762750046	1.6901786023230105	1.5979317074651387	0.9558528079222155	0.6420788995429232	61.56176697910553	78.0	1.6253126576079178	31.319128217777482	glucose
2.3377330896845807	2.0580096647145414	1.6535370150857442	0.9248419588386194	0.7286950562471247	62.56882981234888	84.0	2.742205739313378	37.70693300086896	glucose
2.0214043194839233	1.7029322197440888	1.75564131089451	0.9248419588386194	0.8307993520558905	57.84768981153046	72.0	1.9686952283335022	37.70693300086896	glucose
1.9292782167525493	1.8050068107561854	1.4447495440987925	0.7452003692229969	0.6995491748757957	44.0819535246718	72.0	2.289535483409942	29.04506452755608	glucose
1.8009679317009095	1.703809307033551	1.6127716048585525	0.877820655447255	0.7349509494112975	49.97135715736316	60.0	1.892005633875908	31.098527992060355	glucose
1.778681208036201	1.6175908870809765	1.5008933783307326	0.877820655447255	0.6230727228834776	48.22406387665684	63.0	1.8953787167864449	31.098527992060355	glucose
2.4710351652974705	1.9521448032635114	2.1260267706033344	0.8267685075428721	1.2992582630604623	60.71656971112931	54.0	2.2971531979576474	35.96512445668586	glucose
1.957577019083041	1.5250642211981638	1.9893062168774036	0.8267685075428721	1.1625377093345315	57.753893814660174	57.0	1.4933350234038012	35.96512445668586	glucose
1.51056365758002	2.1118807554986416	1.6486379842269923	0.8063858024292763	0.842252181797716	47.54823212149384	54.0	1.9738064288516695	27.70719894924476	glucose
1.6063835548709406	2.1072882993038746	1.5077567197224342	0.9946531084387018	0.5131036112837324	47.145234583334435	69.0	2.2059151344523813	30.116569524354478	glucose
1.6067548763389967	2.1160277307197948	1.6067548763389967	0.9946531084387018	0.6121017679002949	49.49549566087655	60.0	2.1160277307197948	30.116569524354478	glucose
2.4567850650679595	1.6180595703136391	1.995643781369032	1.0630133853016672	0.9326303960673648	69.8655588664796	60.0	2.0792008540125666	38.01592561996108	glucose
1.8695138352263871	2.354648522602295	1.9284534466416023	1.0630133853016672	0.8654400613399351	51.020315378095994	72.0	2.29570891118708	38.01592561996108	glucose
2.2261976005833226	2.559757126538691	2.2261976005833226	0.997821890684516	1.2283757098988068	67.9209341441206	75.0	2.559757126538691	37.79669330873784	glucose
1.6375752186668182	2.069680797909716	1.752960786036074	0.997821890684516	0.7551388953515582	61.079551906242955	66.0	1.95429523054046	37.79669330873784	glucose
1.6300410115662733	1.8069063481187289	1.700053364312968	0.7538783598612171	0.946175004451751	47.3881028429646	57.0	1.7368939953720341	24.713593151860625	glucose
2.0283999368076864	1.8374238381293888	1.7226919600643156	0.9642267233208012	0.7584652367435143	54.81314561206496	66.0	2.14313181487276	28.761751311175185	glucose
2.0456895509217037	2.8447798277561973	1.7226919600643156	0.9642267233208012	0.7584652367435143	47.718054344532035	75.0	3.1677774186135856	28.761751311175185	glucose
1.9232860767217375	2.332261728410625	1.6607676969266247	0.8613459800321578	0.799421716894467	49.74813967330549	69.0	2.594780108205738	31.206152873964406	glucose
1.6843366370757407	2.1574536451385664	1.7316161976809508	0.876480393018037	0.8551358046629137	52.95905538087216	69.0	2.110174084533356	25.193464902566433	glucose
1.8616996017476128	2.089863515309956	1.6176356003813266	0.876480393018037	0.7411552073632895	52.495703328615065	69.0	2.3339275166762423	25.193464902566433	glucose
2.8062846385740836	1.7400754959338882	1.8731347900975712	1.1130988002916613	0.7600359898059098	64.6504701515075	69.0	2.6732253444104006	34.24919385512804	glucose
1.9033343350068748	1.5312298654994425	2.053324623559092	1.1130988002916613	0.9402258232674306	52.84183083499292	60.0	1.3812395769472254	34.24919385512804	glucose
2.559365867138345	2.1036369879067633	1.9354849584935996	0.9365673950487856	0.9989175634448141	65.85994668782895	72.0	2.7275178965515083	43.17360982421667	glucose
1.8051414502801353	1.7169429556087779	1.9354849584935996	0.9365673950487856	0.9989175634448141	52.887140483785956	66.0	1.5865994473953136	43.17360982421667	glucose
1.5705897332035648	1.8897540284893737	1.587306405867764	1.026662311779546	0.5606440940882179	55.282118911373516	69.0	1.8730373558251745	29.28206669241346	glucose
1.6686548005342738	2.5610201966510777	1.7480889477445447	1.026662311779546	0.7214266359649986	44.71401091740039	57.0	2.4815860494408066	29.28206669241346	glucose
1.6315677870265242	1.9002966447207952	1.6315677870265242	0.9677424792467998	0.6638253077797243	53.85169594410375	60.0	1.9002966447207952	27.771406927386696	glucose
1.6022810036282689	2.2858081330943953	1.6931442829394372	0.9677424792467998	0.7254018036926374	51.60547332360785	69.0	2.194944853783227	27.771406927386696	glucose
2.656640241771786	1.6076799168649911	1.9291322866336917	0.9677424792467998	0.9613898073868918	70.30774007954791	66.0	2.335187872003085	39.37485949443607	glucose
1.9678249941712234	1.6458953284401825	2.120795765783755	0.9677424792467998	1.1530532865369547	54.739347942755685	57.0	1.492924556827651	39.37485949443607	glucose
2.5086924496863228	2.078888866695241	2.5818446443245326	0.9645661433168459	1.6172785010076867	72.34742353928183	60.0	2.005736672057031	40.87138833495055	glucose
1.6221932700734252	1.9181697937053586	1.9118749402915618	0.9645661433168459	0.9473087969747158	50.623845559717594	45.0	1.628488123487222	40.87138833495055	glucose
1.7330283050715742	1.7030151010088628	1.4942887331262067	1.0603978828918774	0.43389085023432944	54.68614466639326	69.0	1.9417546729542303	30.27423067955728	glucose
1.655681559211287	2.131701142391264	1.6122431117639078	1.0603978828918774	0.5518452288720304	50.26068605633074	69.0	2.1751395898386434	30.27423067955728	glucose
1.733838675120497	2.2575527971908826	1.6305696811095092	0.9559374701457809	0.6746322109637283	42.39675983590948	57.0	2.3608217912018703	24.956819539591155	glucose
1.6175067496908695	2.573514493724836	1.698942122604189	0.9559374701457809	0.7430046524584082	50.2355208026774	72.0	2.4920791208115167	24.956819539591155	glucose
2.5633209373969383	1.6498824503833203	2.165650713074345	1.2909223221622663	0.8747283909120791	79.50861540547935	63.0	2.0475526747059134	38.59526845671266	glucose
1.7463352626774589	1.9165648731728082	1.9867369197192573	1.2909223221622663	0.695814597556991	53.33803390601666	72.0	1.6761632161310098	38.59526845671266	glucose
1.7116790405732778	1.7209501916507657	1.809224622310696	0.8152848405547546	0.9939397817559414	50.80178004099142	57.0	1.6234046099133475	26.674441155699952	glucose
1.9691762655523006	1.9241773865112437	1.6401767437157673	0.8152848405547546	0.8248919031610128	45.75862577898687	57.0	2.2531769083477773	26.674441155699952	glucose
2.611890534246724	1.6633777408138055	1.9476335824640798	1.0828253565371726	0.8648082259269071	75.95785827950786	63.0	2.3276346925964497	39.435706729183664	glucose
1.8254625793357178	1.5155918780083557	1.848376639960866	1.0828253565371726	0.7655512834236935	58.48346169925846	66.0	1.4926778173832074	39.435706729183664	glucose
1.6995131078538988	2.0769575183602678	1.76232665158877	0.9933684598596286	0.7689581917291414	57.29579094499434	63.0	2.014143974625396	26.86669634888398	glucose
1.599605850639407	1.9077780520674963	1.5070853831439215	0.9933684598596286	0.5137169232842929	50.32317688801184	72.0	2.000298519562982	26.86669634888398	glucose
1.6276194989391068	1.9313599333334615	1.3984423031079678	0.924188319980433	0.47425398312753475	55.81641973517912	78.0	2.1605371291646005	28.084039682087965	glucose
1.5051699428542928	2.0193736622393943	1.256953320183637	0.924188319980433	0.3327650002032039	43.99149250237819	78.0	2.2675902849100504	28.084039682087965	glucose
2.528664358185062	1.7495073712773683	2.023739764613546	0.9738167912320399	1.0499229733815063	71.18199165801397	60.0	2.254431964848884	40.18293129610345	glucose
1.6892848106413556	1.6919937735219635	1.9159137492114953	0.9738167912320399	0.9420969579794554	56.93416700108409	69.0	1.4653648349518238	40.18293129610345	glucose
2.6040661128378724	1.9922065175129462	1.9031805461135718	1.011869882306773	0.8913106638067988	87.83719590400023	84.0	2.6930920842372466	38.90252858746249	glucose
1.786307618254692	1.5557684757119052	1.848387116510351	1.011869882306773	0.8365172342035778	59.75010945372995	69.0	1.4936889774562463	38.90252858746249	glucose
1.7050013272478988	1.7369613230455974	1.4608409755675769	0.9579568746057476	0.5028841009618292	59.20320887323738	72.0	1.9811216747259193	25.988997086790086	glucose
1.5281598695482725	2.0797220982363784	1.4084483909285779	0.9579568746057476	0.4504915163228303	48.41221406148522	75.0	2.199433576856073	25.988997086790086	glucose
1.629251897633155	2.485629273451655	1.4770569682116688	0.6992211515539839	0.7778358166576848	40.39977540839948	69.0	2.637824202873141	25.040299983678565	glucose
1.7264015339336247	1.5178919748126736	1.3561247549641897	0.9241935582551755	0.4319311967090142	72.51661151706006	84.0	1.8881687537821086	27.4816556654568	glucose
1.516172238577646	2.429594095720308	1.404151902784497	0.9241935582551755	0.47995834452932157	41.30818323654792	72.0	2.5416144315134566	27.4816556654568	glucose
2.6470122308914354	1.8519821924843796	1.9471792570015614	0.9515902730567859	0.9955889839447755	66.64595696824405	72.0	2.5518151663742534	40.062555582121114	glucose
2.0250007168438224	1.599817713747377	1.8136843791853148	0.9515902730567859	0.8620941061285289	53.572301497701986	75.0	1.8111340514058847	40.062555582121114	glucose
1.6658019950833458	2.2259108671878556	1.4926886698445665	0.9068421895926574	0.5858464802519091	46.56146277344509	72.0	2.3990241924266353	31.15385718221265	glucose
1.769278344439076	2.5585807123189577	1.4926886698445665	0.9068421895926574	0.5858464802519091	48.81857179274373	78.0	2.8351703869134672	31.15385718221265	glucose
2.6023664117726306	2.264884298115517	1.9855609468363766	0.9735896285007807	1.0119713183355958	79.70923999382143	84.0	2.881689763051771	40.72326509063747	glucose
2.0849927502341883	1.5084571289663353	2.113412835568297	0.9735896285007807	1.1398232070675163	57.30095710582312	51.0	1.4800370436322265	40.72326509063747	glucose
1.6187666340721303	1.4214621664683786	1.6709392364486468	1.0567064177841485	0.6142328186644983	69.28521645107097	69.0	1.369289564091862	32.07681154206443	glucose
1.7255770209081904	1.9378594646332965	1.7326910280496932	1.0567064177841485	0.6759846102655446	49.71832114630139	57.0	1.9307454574917937	32.07681154206443	glucose
1.627045590061718	1.4660517569944962	1.6829980384753622	0.7463443349222832	0.9366537035530789	61.50210388215613	54.0	1.410099308580852	25.62772300128224	glucose
2.60713382721071	1.5380443982778367	1.826526125147324	0.9927804734181883	0.8337456517291356	80.72116974992186	87.0	2.3186521003412226	40.036406334963544	glucose
1.7219513168946847	1.2924916446433274	1.8748032227627414	0.9927804734181883	0.8820227493445532	70.5579084129207	87.0	1.1396397387752708	40.036406334963544	glucose
1.3753852974806005	2.34512396798218	1.4336125517873506	0.8354696182243234	0.5981429335630271	50.15100037708311	69.0	2.28689671367543	24.904102062648157	glucose
2.5878522981961494	2.0811662109337297	1.7757694681279697	0.913263062573662	0.8625064055543077	66.95138388679224	75.0	2.8932490410019094	40.10975118785707	glucose
1.5848616019224826	1.698008496508681	1.730608423770148	0.913263062573662	0.817345361196486	48.54365227200118	72.0	1.5522616746610156	40.10975118785707	glucose
1.4314935684896175	2.091445656660995	1.553622057211296	0.9374016113813707	0.6162204458299252	50.798209258512884	60.0	1.9693171679393164	26.491558721456688	glucose
1.4282156987089971	1.9119699713168528	1.463449704303764	0.9374016113813707	0.5260480929223932	48.95104365435502	63.0	1.876735965722086	26.491558721456688	glucose
1.3356114128010548	1.6513285504357889	1.5066638449107415	0.865304211885074	0.6413596330256675	56.83932463157283	72.0	1.4802761183261022	24.38248618342281	glucose
1.4487591665523418	1.7254720175344131	1.5669691003712356	0.865304211885074	0.7016648884861616	53.022765271062816	54.0	1.6072620837155194	24.38248618342281	glucose
2.5440549781363866	1.8076926251763514	2.0617719618717	0.8878847340639848	1.1738872278077148	65.85190761071678	63.0	2.289975641441038	39.81311227994076	glucose
1.8675660704580854	1.5682901563704863	1.9987196708460022	0.8878847340639848	1.1108349367820174	64.80878563585172	72.0	1.4371365559825695	39.81311227994076	glucose
1.5949951936406328	2.07579229722427	1.4954200560033233	0.776811028605648	0.7186090273976754	47.39976845704576	69.0	2.1753674348615792	22.022977976763347	glucose
2.663313009141619	1.7399827245328185	2.108238547588707	1.03088598093585	1.077352566652857	74.44561296722655	57.0	2.2950571860857307	39.13930735594441	glucose
1.623528576728395	1.6932088514381276	2.108238547588707	1.03088598093585	1.077352566652857	55.305869173464146	60.0	1.2084988805778156	39.13930735594441	glucose
1.4428499275414504	2.0688261777279378	1.4973272063129184	0.9993598354230011	0.49796737088991727	56.10804075302927	69.0	2.01434889895647	28.73178569935516	glucose
1.653623499559908	1.9782573957213072	1.653623499559908	0.9993598354230011	0.6542636641369067	50.21645515566992	57.0	1.9782573957213072	28.73178569935516	glucose
2.5692391614505876	1.8028145192355778	2.762411029475634	1.0541192737943534	1.7082917556812804	86.05291815988744	57.0	1.6096426512105313	40.97404629448645	glucose
1.876468854078118	1.361777347894138	1.9258638217725275	1.0541192737943534	0.871744547978174	80.03126730383316	60.0	1.3123823801997285	40.97404629448645	glucose
1.5408763969414698	1.9116610758713635	1.6774474290204502	1.0541192737943534	0.6233281552260969	48.97302980878823	51.0	1.775090043792383	24.977362718898384	glucose
1.4443671626939507	1.5313178201370008	1.4443671626939507	1.0541192737943534	0.3902478888995974	54.66135340841367	57.0	1.5313178201370008	24.977362718898384	glucose
1.4160100458171234	1.979321343161025	1.8053887536538074	0.8387237145102251	0.9666650391435823	42.7986890273166	39.0	1.589942635324341	23.70579072217646	glucose
1.6084344856305903	1.5096182969839234	1.7051762143995284	0.9629319108862637	0.7422443035132648	106.80760505580083	93.0	1.4128765682149853	28.868751601201815	glucose
1.3798632572944063	2.1610342614475355	1.646552359351201	0.9629319108862637	0.6836204484649374	70.60953316573922	78.0	1.8943451593907406	28.868751601201815	glucose
2.6804506602359006	2.2491159397720826	2.6804506602359006	1.381205514737817	1.2992451454980836	81.91263887964428	72.0	2.2491159397720826	39.526756330009036	glucose
1.6192380433332452	1.5490406475309166	1.726131233593776	1.381205514737817	0.3449257188559591	65.05682664401402	57.0	1.4421474572703858	39.526756330009036	glucose
1.4205808161442735	2.1892085603133973	1.53538492411675	0.863065616796888	0.672319307319862	53.514340504114315	66.0	2.0744044523409206	24.911354512819155	glucose
1.5941707376749559	1.9174960770819278	1.8529515574461715	0.863065616796888	0.9898859406492835	55.29469444187199	51.0	1.6587152573107122	24.911354512819155	glucose
3.030274018805892	1.5523897732880285	2.0117705013531193	1.3402253301179503	0.6715451712351689	80.43728553976526	72.0	2.570893290740801	41.2377024651677	glucose
2.029939233489034	1.374876501148162	2.1165499030862867	1.3402253301179503	0.7763245729683365	60.31038277757744	63.0	1.2882658315509095	41.2377024651677	glucose
1.511609188464909	1.799940373050834	1.535117075373896	1.0582749515431433	0.4768421238307528	47.727581281867224	63.0	1.776432486141847	31.22983436136975	glucose
1.6868135950976508	1.7291393308696714	1.535117075373896	1.0582749515431433	0.4768421238307528	58.939817703317445	69.0	1.8808358505934262	31.22983436136975	glucose
1.7511813124736682	1.208564409845596	1.962115033877969	1.0058852506765597	0.9562297832014093	103.01860735793515	96.0	0.9976306884412953	46.61960028932141	glucose
1.4762010078283372	1.8960736683359611	1.7414098082833451	0.767558537686948	0.973851270596397	50.34262898724343	48.0	1.6308648678809532	23.255525976383215	glucose
1.5604400911874594	2.0314169075635746	1.5176014656399686	0.767558537686948	0.7500429279530205	52.378789207546525	69.0	2.0742555331110655	23.255525976383215	glucose
1.370250435183924	1.811629990502944	1.4213199282956277	0.9810575169389845	0.44026241135664335	74.0472569201597	96.0	1.7605604973912403	26.941250961133356	glucose
1.3159119616195458	2.326713597423373	1.4521757907112764	0.9810575169389845	0.47111827377229204	63.31200496301498	84.0	2.190449768331642	26.941250961133356	glucose
1.3930111335605968	1.7569322218413572	1.4293462836686055	0.8707049041416726	0.5586413795269328	45.87471238545804	66.0	1.7205970717333485	22.71078473582057	glucose
1.4504266807053934	1.8855369522631837	1.5468839346410819	0.7106599641478138	0.8362239704932679	54.925567050344696	69.0	1.7890796983274952	21.080775925906522	glucose
1.6672982309134476	1.8671524811958964	1.4219009305423538	0.7106599641478138	0.7112409663945398	58.11948375351873	75.0	2.1125497815669902	21.080775925906522	glucose
2.9908282883401838	1.2905499852278406				63.76439183428383				glucose
1.3701233548397984	1.9763106109616206				46.57232505266602				glucose
1.5167668720397611	2.4461729450876613				47.633767396570654				glucose
1.970016199842024	1.5715735389291194				46.088961336475506				glucose
1.8046540403890352	2.011288879663261				44.43139073931185				glucose
1.567357535920309	1.6985607747375089				42.486723785817425			21.078820843689204	glucose
1.6622366069397454	1.885232670797629				46.632219440755414			30.307941536031137	glucose
1.7811073695079573	1.5543488958269738				49.717733836345054			30.307941536031137	glucose
1.8432898336720578	1.7580994409678137				43.466084293002744			27.763908313677465	glucose
1.8845723189421093	1.5725911375907524				51.40791083704715			27.763908313677465	glucose
1.500770134967582	1.9714200472638626				47.101873503857455			27.40165183858396	glucose
1.6123776191170847	2.175449116505941				41.39003390379281			27.40165183858396	glucose
1.6164213477040243	1.8598053171671436				46.16559247638801			25.57287087599608	glucose
1.7511898076284245	1.7665604803844357				47.69865837886432			25.57287087599608	glucose
1.7061769345975566	1.859054010259454	1.54324650344516			42.32393114728111	54.0	2.021984441411851	26.941381655821914	glucose
1.635011306452145	1.6214862624336792	1.4774135064450251			48.28874072207857	60.0	1.779084062440799	26.941381655821914	glucose
1.768116297440718	2.144334931182729	1.6615603490002089			49.74431434664141	60.0	2.2508908796232383	24.868020733908065	glucose
1.7410927573487087	1.9533016815911597	1.7410927573487087			52.517870655962795	57.0	1.9533016815911597	24.868020733908065	glucose
1.6189588958557113	1.922718171347466				42.501710354754465			23.088771307193568	glucose
1.5126791044505041	2.12846554690851	1.5383138548718627	0.77162325172258	0.7666906031492827	42.610741677195364	63.0	2.1028307964871513	26.248875916885485	glucose
1.8288455437082585	2.240117124229304	1.6550091216983125	0.8307801745001044	0.8242289471982082	54.605600725374536	75.0	2.4139535462392496	27.20178919139566	glucose
1.5888344469911713	1.7468636561032402	1.5888344469911713	0.8307801745001044	0.7580542724910669	50.46635034454448	54.0	1.7468636561032402	27.20178919139566	glucose
1.7020382816442348	1.9782830137480565	1.515423308491434	0.8705463786743544	0.6448769298170796	51.23281272826688	72.0	2.1648979869008573	26.786042420749364	glucose
1.715150895264409	1.668155483942254	1.4565926095432984	0.8705463786743544	0.586046230868944	45.9137609416134	63.0	1.9267137696633647	26.786042420749364	glucose
1.4809284859089114	1.7813019835056534	1.4739137165023468	0.7944172234955856	0.6794964930067612	42.12903522831089	57.0	1.788316752912218	24.44360687678725	glucose
1.695796435872648	1.672076393164952	1.4144160197990607	0.7944172234955856	0.6199987963034752	54.55236094790352	66.0	1.9534568092385394	24.44360687678725	glucose
1.748870110702135	1.5778383383499828	1.6291992460121705	0.757711654245717	0.8714875917664534	51.7424099684892	57.0	1.6975092030399472	26.185204332988228	glucose
2.0896235939303516	1.7487743633733093	1.6189119563274932	0.8275045608491562	0.7914073954783368	61.55521273372441	72.0	2.2194860009761674	28.13608528781936	glucose
1.7071469150896055	1.5204523423564849	1.558421091738823	0.8275045608491562	0.7309165308896667	52.237833832999904	69.0	1.6691781657072673	28.13608528781936	glucose
1.413143662063434	2.344800297564011	1.413143662063434	0.7369568582511734	0.6761868038122604	46.77416270226681	66.0	2.344800297564011	22.783515167829403	glucose
1.5579179009607997	1.9248212195693772	1.4777877935030097	0.7369568582511734	0.7408309352518362	49.11239252674898	63.0	2.0049513270271673	22.783515167829403	glucose
1.4926660538704735	2.417775339438772	1.4926660538704735	0.7792105458694115	0.713455508001062	69.09258274171351	96.0	2.417775339438772	26.263798693686237	glucose
1.435599100762776	2.2530422136444557	1.435599100762776	0.7792105458694115	0.6563885548933646	50.681758425553994	69.0	2.2530422136444557	26.263798693686237	glucose
1.7725374834403895	2.049860451223756	1.7938146496731604	0.8094559781637466	0.9843586715094138	54.119297389820815	66.0	2.0285832849909853	32.148055291236176	glucose
1.6534720455814822	1.78726763898107	1.734228614732643	0.8094559781637466	0.9247726365688962	51.07734938630057	63.0	1.7065110698299093	32.148055291236176	glucose
1.5923312513369168	1.8094604010555808	1.5858428873366763	0.8671143073663214	0.7187285799703549	52.047460627601026	63.0	1.8159487650558213	25.43803147048434	glucose
1.6077765492096732	2.209724506549449	1.651737351388011	0.8671143073663214	0.7846230440216896	50.49850670508539	66.0	2.1657637043711113	25.43803147048434	glucose
1.6383140933067992	2.2635689731506163	1.7031183632894469	0.8969073248365802	0.8062110384528668	45.52866314188139	66.0	2.198764703167969	27.269807437544454	glucose
1.6463403969909989	2.164001451979483	1.638920200300626	0.8969073248365802	0.7420128754640459	49.5598352090189	72.0	2.171421648669856	27.269807437544454	glucose
1.5831138649154486	1.8018935126016569	1.5087729172544206	0.7929214436683382	0.7158514735860825	54.72485487985978	69.0	1.8762344602626848	24.497403866721797	glucose
2.0122457236021867	1.8832352995426085	1.8638399595578177	0.8515591816447234	1.0122807779130942	53.51549603385284	54.0	2.0316410635869775	25.204832204719988	glucose
1.5507198622118068	1.8055738758193969	1.8638399595578177	0.8515591816447234	1.0122807779130942	56.55647057171765	66.0	1.492453778473386	25.204832204719988	glucose
1.8102573150032375	1.3966541292392984	1.48115549192084	0.819460100150313	0.661695391770527	61.81895098555982	69.0	1.7257559523216959	25.32831379986152	glucose
1.8529993312688577	1.921488342634683	1.679837604606237	0.819460100150313	0.860377504455924	61.37847435094596	72.0	2.0946500692973036	25.32831379986152	glucose
2.1394891566792382	2.2287370787743455	2.210043251338087	0.9319199797789088	1.2781232715591784	64.09128401870326	63.0	2.1581829841154967	30.957626516956715	glucose
1.5474891894826022	2.4466214418654704	1.5474891894826022	0.9319199797789088	0.6155692097036934	54.82676718043868	75.0	2.4466214418654704	30.957626516956715	glucose
1.3484618455318063	2.1881379801926935	1.4719958828074369	0.74057774596042	0.7314181368470168	47.44623232796036	60.0	2.0646039429170626	27.850112538511347	glucose
1.4900619942139364	1.5771581309892273	1.6175660865043495	0.9319199797789088	0.6856461067254406	60.48623137201383	66.0	1.4496540386988142	23.857228649412413	glucose
1.5036957102766773	2.2303813137219715	1.3963371644024225	0.9319199797789088	0.46441718462351367	52.581883420146625	84.0	2.337739859596226	23.857228649412413	glucose
2.1859114401649613	2.094272628949211	1.9815410662247068	1.1050216256690435	0.8765194405556632	55.70238244962242	63.0	2.2986430028894658	32.9152177950652	glucose
1.8851706767443965	1.8080633537403634	1.9815410662247068	1.1050216256690435	0.8765194405556632	55.65922720774891	63.0	1.7116929642600531	32.9152177950652	glucose
1.7514152569906416	1.6239179205644667	1.652082006472245	0.7737445947413011	0.8783374117309438	50.71268584099751	63.0	1.7232511710828633	23.807525992040034	glucose
2.1037728223152636	2.1570331430536007	1.5905960605308342	0.7737445947413011	0.8168514657895332	53.03750552186416	72.0	2.67020990483803	23.807525992040034	glucose
2.129660664275415	1.972165646462051	1.9133487486994292	0.9907705331123534	0.9225782155870759	57.10401249339439	63.0	2.188477562038037	33.629406771768636	glucose
1.8341091551331619	2.056077748325772	1.9861265088710598	0.9907705331123534	0.9953559757587063	55.31177561680191	66.0	1.904060394587874	33.629406771768636	glucose
1.7859090638887112	1.971562850586641	1.5319695170551373	0.9907705331123534	0.5411989839427839	53.11695419906597	72.0	2.2255023974202146	29.002625796067637	glucose
1.714182238816487	2.283610071176823	1.5902868421747887	0.9907705331123534	0.5995163090624354	46.65694667394526	69.0	2.4075054678185213	29.002625796067637	glucose
2.0083739163544747	1.9498833785145915	1.9068547809681649	0.9566743743497146	0.9501804066184503	55.16748181955464	60.0	2.0514025139009013	32.76401021962177	glucose
1.713740397412868	2.1866714910805594	1.7729152237298982	0.9566743743497146	0.8162408493801837	45.512857835216494	66.0	2.1274966647635294	32.76401021962177	glucose
1.7977804897640624	1.8542110839685744	1.8066075945037163	0.7659847585275686	1.0406228359761476	46.945300631831586	51.0	1.8453839792289204	27.475524059826324	glucose
1.8911865449779472	2.0113245809323983	1.737635491211364	0.9930632544355299	0.7445722367758343	57.41016604948588	69.0	2.1648756346989813	28.217063925125565	glucose
1.8848733727103273	2.0197652422189187	1.6735219541175097	0.9930632544355299	0.6804586996819798	48.53807949971469	63.0	2.231116660811736	28.217063925125565	glucose
1.952771957323666	2.33062001951198	1.9059173159690066	0.9534273904840824	0.9524899254849242	52.94599348703096	63.0	2.3774746608666395	30.8980602516073	glucose
1.4902250117622224	1.6361594706793707	1.835414196049962	0.9534273904840824	0.8819868055658795	61.74196365659491	72.0	1.2909702863916312	30.8980602516073	glucose
1.688195402413365	2.2309703893728567	1.7004070737382027	0.8864576118649491	0.8139494618732535	51.849090665920116	72.0	2.2187587180480195	26.365236883274893	glucose
1.9554130281840811	1.6975741990300885	1.6244650748901668	0.8864576118649491	0.7380074630252176	49.91108400271946	57.0	2.028522152324003	26.365236883274893	glucose
2.0930491548437304	1.7323838933591293	1.9036512127776841	0.9529586579845033	0.9506925547931807	62.0677612461993	63.0	1.9217818354251757	30.042645497287168	glucose
1.8444552466713149	1.3443534755408653	1.6920645878349392	0.9529586579845033	0.7391059298504359	49.37816574809363	57.0	1.496744134377241	30.042645497287168	glucose
1.7533619071741857	1.5796546259238105	1.5404856680869992	0.8502035368691013	0.6902821312178978	42.0846052939954	57.0	1.792530865010997	25.972236960205613	glucose
1.8280240996455874	2.336454537384038	1.5404856680869992	0.8502035368691013	0.6902821312178978	35.35797588731786	60.0	2.623992968942626	25.972236960205613	glucose
1.5240546354021252	1.5423058239779301	1.3209250541345976	0.917707098024981	0.40321795610961664	65.43641725184177	81.0	1.7454354052454577	22.92653864249573	glucose
1.3722798829942382	1.9898923322563349	1.2771777233360317	0.917707098024981	0.3594706253110507	53.37174583622463	87.0	2.084994491914541	22.92653864249573	glucose
1.4153315632506862	2.3090398674406494	1.4153315632506862	0.8460322939174696	0.5692992693332166	49.43200146211272	69.0	2.3090398674406494	28.376234564174073	glucose
1.3957754754386127	2.2316020026722327	1.5286540671220417	0.8460322939174696	0.6826217732045721	45.723077914018056	66.0	2.098723410988804	28.376234564174073	glucose
2.1847549286495815	1.6842254138083534	1.7887534274862695	0.9518256063888421	0.8369278210974274	72.7729704544625	66.0	2.0802269149716652	32.20075622836508	glucose
1.6983505827741903	1.9077431450821387	1.6983505827741903	0.9518256063888421	0.7465249763853482	55.233228930440745	60.0	1.9077431450821387	32.20075622836508	glucose
1.7668801333082294	1.9324949231110273	1.6414020602573067	0.7076657816253431	0.9337362786319635	53.467036987966964	66.0	2.0579729961619497	21.77433174231825	glucose
1.9807618119558081	1.6586738116066169	2.068729991445393	0.8943767137431348	1.1743532777022585	95.7091164902603	78.0	1.5707056321170318	33.61161428691664	glucose
1.6945050767778924	1.3503081800155532	1.8799956212014968	0.8943767137431348	0.985618907458362	106.44717556778266	93.0	1.1648176355919488	33.61161428691664	glucose
1.6413108686542808	1.7168489812751107	1.6413108686542808	0.8491752913870951	0.7921355772671856	58.09324099762952	60.0	1.7168489812751107	26.12847050421831	glucose
1.6401797978692176	1.6085763228945908	1.6401797978692176	0.8491752913870951	0.7910045064821226	63.89235423645406	63.0	1.6085763228945908	26.12847050421831	glucose
1.6368764768269617	2.207628198870921	1.455088020780539	0.8206554343271404	0.6344325864533987	46.271781957465734	69.0	2.389416654917344	25.250936440835087	glucose
1.4692078686198373	1.8086480914252019	1.5081161520899569	0.8206554343271404	0.6874607177628165	51.826274509867325	69.0	1.7697398079550823	25.250936440835087	glucose
1.8501735760636489	2.5043614554316873	1.9626776572865028	1.0343649957226966	0.9283126615638063	70.45344177658347	81.0	2.3918573742088336	30.47325864547397	glucose
1.4320219188114023	1.3596230306953552	1.4771815528632817	1.0343649957226966	0.4428165571405852	133.94777752409954	123.0	1.3144633966434758	30.47325864547397	glucose
1.4717243311687769	2.127221102608542	1.4717243311687769	0.9399978106007484	0.5317265205680285	69.7638312666931	90.0	2.127221102608542	26.069308873506035	glucose
1.3399324502402312	2.127852342948108	1.4929550766547428	0.9399978106007484	0.5529572660539944	67.79146572234397	96.0	1.9748297165335962	26.069308873506035	glucose
1.9083857724131554	1.8841168753188737	1.7570181240355083	0.7275440103902695	1.0294741136452388	48.445829922901666	54.0	2.035484523696521	25.1827150281071	glucose
2.4341321927358095	2.172542663372374	1.7193558682379617	0.9813388286432514	0.7380170395947103	61.93509659651933	81.0	2.8873189878702217	28.464208862517673	glucose
1.9692265005221137	1.2960256505325727	0.9813388286432514	0.9813388286432514	0.0	65.79259874142245	129.0	2.283913322411435	28.464208862517673	glucose
1.7456829765792325	1.7970451554279032	1.5047886538115245	0.7358621655843884	0.768926488227136	61.70003127725322	81.0	2.0379394781956113	22.64191278721195	glucose
1.584250277531863	1.65697176593147	1.4387371752568037	0.4906694143216257	0.9480677609351781	55.193110619085665	69.0	1.8024848682065293	30.295792315724825	glucose
1.485371414714851	2.337170262536409	1.4387371752568037	0.4906694143216257	0.9480677609351781	43.99767214519704	72.0	2.3838045019944563	30.295792315724825	glucose
2.3865020392007463	1.7432948980982972	1.9473831449499415	0.8596779341189809	1.0877052108309606	64.46122676245623	66.0	2.1824137923491023	37.448187580550915	glucose
1.9410827502909116	1.9776702435943176	1.7607906037850822	0.8596779341189809	0.9011126696661013	47.35908863749284	72.0	2.1579623901001472	37.448187580550915	glucose
1.8495602249247427	1.7597592098293862	1.4409037260345887	0.8803953018925411	0.5605084241420477	52.87469595468218	72.0	2.1684157087195404	29.862811542937102	glucose
1.9168020694917236	2.3341188929134256	1.6437733472683789	0.8803953018925411	0.7633780453758378	49.60515755483379	69.0	2.6071476151367703	29.862811542937102	glucose
2.3566654631654216	1.9740619675898947	1.8744301074341558	0.9736915724749707	0.900738534959185	71.76523363471978	72.0	2.4562973233211602	36.715415987703786	glucose
1.5984867303721968	1.6379567846548988	1.9993502680946518	0.9736915724749707	1.025658695619681	58.95632233085054	63.0	1.2370932469324438	36.715415987703786	glucose
1.6582919638020295	2.058748144193201	1.6038209475921001	0.7204518630172944	0.8833690845748057	46.37357680298099	63.0	2.1132191604031303	28.454772691149888	glucose
1.6533937797681841	1.8570648553286833	1.5419705074316636	0.7204518630172944	0.8215186444143693	46.95141843942748	63.0	1.9684881276652038	28.454772691149888	glucose
1.5351304952610805	2.186412541912067	1.7792689097211891	0.9996751340473259	0.7795937756738632	56.358330337871664	60.0	1.9422741274519582	24.59210354418764	glucose
1.4411044037203462	2.323811594441043	1.6912406925278238	0.9996751340473259	0.691565558480498	51.968943839969654	60.0	2.0736753056335653	24.59210354418764	glucose
2.207855412967001	1.6558384543312745	1.9283908496743214	0.9372150537170779	0.9911757959572434	96.61415773964038	90.0	1.935303017623954	36.25639174100648	glucose
1.7029292089146824	1.9299237193163596	2.043445026163187	0.9372150537170779	1.1062299724461093	54.89054150123807	66.0	1.589407902067855	36.25639174100648	glucose
1.7687300300619844	2.2020749200521488	1.9177114001237912	1.0217225130815935	0.8959888870421976	51.42632468113254	54.0	2.0530935499903418	26.198910906379727	glucose
1.5431413193822028	2.491832667913859	1.6212878847536099	1.0217225130815935	0.5995653716720163	45.43195455654448	72.0	2.413686102542452	26.198910906379727	glucose
1.6249747002162371	2.1170087307800216	1.3851616779321851	0.8896344548605946	0.4955272230715906	44.873385478951654	78.0	2.3568217530640734	23.617392234785854	glucose
2.2218340557580714	1.5806199545638577	2.2218340557580714	0.9641954248371607	1.2576386309209107	77.40140468085129	60.0	1.5806199545638577	33.967006353338476	glucose
1.4764838458415184	1.8511847297761699	1.5952887626327297	0.9641954248371607	0.6310933377955691	53.73839316165497	57.0	1.7323798129849586	33.967006353338476	glucose
1.8626599662943522	1.4558626692572398	1.831162384061617	0.9588557000618956	0.8723066839997214	50.40946985341783	48.0	1.487360251489975	27.211231231722834	glucose
2.0095526408084607	1.8065548559079887	1.688904753030413	0.9588557000618956	0.7300490529685174	45.394243732011454	54.0	2.1272027436860363	27.211231231722834	glucose
2.014095584806731	2.3164425438039626	1.6622482588251233	1.1109170278790357	0.5513312309460876	48.89470095010656	69.0	2.6682898697855704	34.18206239627802	glucose
1.7453649344961746	1.5586429714622922	1.881450068830731	1.1109170278790357	0.7705330409516954	55.39333268063569	45.0	1.4225578371277359	34.18206239627802	glucose
1.4852899830228916	1.8010689274748806	1.4814744314853066	0.7976443813163648	0.6838300501689416	65.45956760731788	84.0	1.8048844790124656	22.715136089869514	glucose
1.5012058119413352	1.761406055779724	1.5012058119413352	0.7976443813163648	0.7035614306249702	50.89714756436313	57.0	1.761406055779724	22.715136089869514	glucose
1.5217423334992093	2.3240019828112715	1.6495034725091802	0.9407250344153655	0.7087784380938146	51.58729042511828	63.0	2.1962408438013004	26.85176822301807	glucose
1.6529135518942162	1.9669614470263743	1.6529135518942162	0.9407250344153655	0.7121885174788507	61.01180890005136	69.0	1.9669614470263743	26.85176822301807	glucose
2.1777143957108556	1.8424361813065926	2.0751130980842323	0.8311241294125616	1.2439889686716705	84.79992155550752	78.0	1.9450374789332159	30.98608592010355	glucose
1.779672452877643	1.555669969933993	1.9059064195038902	0.8311241294125616	1.0747822900913286	59.58797271543763	63.0	1.429436003307746	30.98608592010355	glucose
1.5539949371117985	1.7072079648614558	1.5539949371117985	0.9529532097519451	0.6010417273598533	70.13131571752658	75.0	1.7072079648614558	27.379576198117586	glucose
1.5606149035614765	1.8140203987407064	1.610478223422016	0.9529532097519451	0.6575250136700709	64.71229452241093	75.0	1.7641570788801668	27.379576198117586	glucose
1.9099977537564667	2.3810214455804406	1.5097814188879801	0.8247517362545901	0.6850296826333901	41.10470911049666	66.0	2.781237780448927	23.41142051537245	glucose
2.26810025624273	2.0577806693286216	1.8675118089537122	1.0375565490421161	0.8299552599115961	64.41157855540386	69.0	2.4583691166176393	33.503298395551624	glucose
1.6152069208179585	1.712542396028264	1.8222740923991427	1.0375565490421161	0.7847175433570268	77.67342133170905	93.0	1.5054752244470797	33.503298395551624	glucose
1.5455205713176574	2.468798963852539	1.536715836206183	0.7769974685558992	0.7597183676502838	45.74955412264508	69.0	2.4776036989640136	23.90761441710459	glucose
1.6466031510699535	2.23773756597242	1.405925086616427	0.7769974685558992	0.6289276180605279	41.1895922185511	66.0	2.478415630425947	23.90761441710459	glucose
2.379481440879247	1.7181940811147705	1.9009123950707565	0.9337559044768561	0.9671564905939004	61.212111068895226	60.0	2.196763126923261	34.893850096042	glucose
1.795504637925328	2.0314962001877106	1.8405240083577308	0.9337559044768561	0.9067681038808746	57.70156333176051	78.0	1.9864768297553077	34.893850096042	glucose
1.6469472761759483	1.4893429583113158	1.343094442693538	0.9111370461995714	0.43195739649396675	51.65374284556882	72.0	1.793195791793726	24.849337243353208	glucose
2.0899706927722574	1.997106932546445	1.728782294948432	0.9504561975353782	0.7783260974130537	46.50744907690013	60.0	2.3582953303702707	36.60740678275764	glucose
1.6506733173427592	1.4949024240099582	1.8503215699147382	0.9504561975353782	0.8998653723793598	54.82282436763299	60.0	1.2952541714379793	36.60740678275764	glucose
1.8645650480607834	2.014420713149197	1.541424538907435	0.9202620041788654	0.6211625347285696	48.2570521864027	69.0	2.3375612223025453	27.623148275774277	glucose
1.8334408507112803	2.5919545462958204	1.4342345188313304	0.9202620041788654	0.513972514652465	42.477787948887574	78.0	2.9911608781757706	27.623148275774277	glucose
1.7774351493662606	2.6129466390935763	1.8687298892417104	0.864391147474216	1.0043387417674943	55.191467371119934	78.0	2.521651899218126	32.15339527341934	glucose
1.4130992726833187	1.6397323349806483	1.4130992726833187	0.864391147474216	0.5487081252091028	62.090272115939044	69.0	1.6397323349806483	32.15339527341934	glucose
1.3608441429237867	2.1591097437896596	1.3608441429237867	0.9251607849573691	0.4356833579664176	48.13812371479598	66.0	2.1591097437896596	25.394974112965524	glucose
1.4662207595644927	2.170193359483867	1.5343451424804362	0.9251607849573691	0.6091843575230671	45.78705076059948	57.0	2.1020689765679235	25.394974112965524	glucose
1.8116095816874966	1.7454044327014353	1.3739627050452317	0.7707122694537175	0.603250435591514	43.14796970392035	66.0	2.1830513093437003	28.68561612401205	glucose
1.399956472550475	1.7349276945516554	1.4761417498026033	0.7065496363416593	0.7695921134609439	67.06618824253952	81.0	1.658742417299527	21.739988810512596	glucose
1.2690331355207232	2.263626093503963	1.2690331355207232	0.7065496363416593	0.5624834991790637	54.83997105635761	81.0	2.263626093503963	21.739988810512596	glucose
2.509125990370742	2.272074811795961	1.6862901623602282	0.9343649446208552	0.751925217739373	54.8276213358929	72.0	3.094910639806475	27.345156144096315	glucose
1.6724793878439943	1.8320157675193154	1.6862901623602282	0.9343649446208552	0.751925217739373	50.598837280086656	75.0	1.8182049930030815	27.345156144096315	glucose
2.8443352574424963	1.564934296258754	1.699276336696507	0.8431450811801141	0.8561312555163929	61.665133809452996	66.0	2.7099932170047434	38.601938313396026	glucose
1.97052431955476	1.3097259149429001	1.7649623752808914	0.8431450811801141	0.9218172941007774	53.04489096088311	63.0	1.5152878592167687	38.601938313396026	glucose
1.7129797945177643	1.747967607898357	1.4866314459890566	0.8431450811801141	0.6434863648089425	53.21985639482685	66.0	1.9743159564270647	25.730452120676834	glucose
1.6292985176480195	1.805106446772931	1.4267742957943146	0.8431450811801141	0.5836292146142005	52.98337255352362	72.0	2.0076306686266356	25.730452120676834	glucose
2.3418204578942534	1.8913507601812851	2.0608506559769304	0.8496381683482535	1.2112124876286767	59.711392341162835	57.0	2.172320562098608	43.759003960653786	glucose
1.7821459821095664	1.8352290249071346	2.0608506559769304	0.8496381683482535	1.2112124876286767	52.87235691356723	60.0	1.5565243510397706	43.759003960653786	glucose
1.5809338144338705	1.8616899788454933	1.5809338144338705	0.8824811876404457	0.6984526267934247	53.441091360397664	60.0	1.8616899788454933	30.31575876238092	glucose
1.4340210199189418	2.4321977604711744	1.5164460090132432	0.8824811876404457	0.6339648213727974	46.12619922669727	72.0	2.3497727713768732	30.31575876238092	glucose
2.3118636286060585	1.5865093558223782	1.9066153752145794	1.0304253279884652	0.8761900472261143	67.65578265059227	60.0	1.9917576092138574	36.02800704452697	glucose
1.7028001024648727	1.7806998658202848	1.8413605802382496	1.0304253279884652	0.8109352522497846	58.104150575783166	72.0	1.642139388046908	36.02800704452697	glucose
1.5334229425750308	2.086930111402766	1.738933475997873	1.0304253279884652	0.7085081480094079	48.41150849593188	63.0	1.8814195779799237	27.41763049399333	glucose
1.63842481797527	2.873300725112605	1.63842481797527	1.0304253279884652	0.607999489986805	49.26884234874917	72.0	2.873300725112605	27.41763049399333	glucose
1.5496623074418872	2.459102829675946	1.4732091069199948	0.7904669072169352	0.6827421997030596	41.56930608018716	69.0	2.535556030197838	24.322058683598005	glucose
2.2597857906239045	1.9261387267000463	2.318581920871972	0.9533076876072897	1.3652742332646823	80.95706788035406	69.0	1.8673425964519788	35.567132747785514	glucose
1.5036920913379381	2.0308932218638227	1.5036920913379381	0.9533076876072897	0.5503844037306483	60.825682591239655	75.0	2.0308932218638227	35.567132747785514	glucose
1.6485964005016795	1.5731519404943428	1.262124946264462	0.9206802901191248	0.3414446561453371	46.554667237083834	72.0	1.9596233947315604	26.196924653305732	glucose
1.6150163294530318	1.6221752580955826	1.5094383735227044	0.9206802901191248	0.5887580834035796	47.84717614974619	60.0	1.72775321402591	26.196924653305732	glucose
1.3233489524840687	2.7181258327366242	1.74940656451788	0.631062473132231	1.1183440913856488	44.701386019097725	54.0	2.292068220702813	25.363021546179684	glucose
2.239948329144025	2.0598783056769916	1.7485384853402886	1.159290960435986	0.5892475249043024	66.96335756172775	84.0	2.551288149480728	34.76593524036776	glucose
1.7682726949784011	1.6851856692505094	1.5778092908317043	1.159290960435986	0.4185183303957182	62.13102889844527	93.0	1.8756490733972062	34.76593524036776	glucose
1.6264517665643614	1.822839562639673	1.2133594295400163	0.7518460456689691	0.4615133838710473	52.555296325961706	90.0	2.235931899664018	23.133724482122123	glucose
1.82380148415411	1.727681632165431	1.34440777658194	0.7518460456689691	0.5925617309129709	49.92340282527746	72.0	2.207075339737601	23.133724482122123	glucose
1.6485685808760722	1.5510975392868223	1.4125789612767636	0.7889046454158521	0.6236743158609116	56.44358589542522	72.0	1.7870871588861308	27.204195307360017	glucose
1.5723013701288233	1.7235708774184635	1.3660842506837647	0.7889046454158521	0.5771796052679125	47.76253363731013	72.0	1.929787996863522	27.204195307360017	glucose
1.6538167892676576	1.6582268821027613	1.360185654116257	0.6066797147700081	0.7535059393462488	50.902152066227885	69.0	1.951858017254162	25.022334870220945	glucose
2.562855895644836	1.3397051490065568	1.729882617630484	0.8742692426701443	0.8556133749603398	79.12059589857095	69.0	2.1726784270209087	34.46074352529269	glucose
1.7022799836244749	1.3066437848845973	1.5760051872303464	0.8742692426701443	0.7017359445602022	62.060465008455694	81.0	1.4329185812787257	34.46074352529269	glucose
1.9552662752684387	2.2979307345696705	1.8513627431176336	0.864941308815242	0.9864214343023915	160.54476901930178	186.0	2.4018342667204755	39.42855224068978	glucose
1.6636094930775418	1.586751128734169	1.7565613797645148	0.864941308815242	0.8916200709492728	55.88425102908025	66.0	1.493799242047196	39.42855224068978	glucose
1.487337675554993	1.6184148200691908	1.406946674337763	0.7880025936151732	0.6189440807225899	56.48597166739348	66.0	1.6988058212864208	26.18892282499192	glucose
1.3853245371570113	1.9572012169137525	1.2723960410458444	0.7880025936151732	0.48439344743067114	49.57839933179909	78.0	2.0701297130249197	26.18892282499192	glucose
1.464699824230439	2.152841414745057	1.486192033039088	0.7062894806383818	0.7799025524007062	48.29790388722408	69.0	2.1313492059364076	25.36259355193957	glucose
1.496238666239654	1.7935343518794955	1.4324354478037198	0.7062894806383818	0.726145967165338	47.5081229444762	63.0	1.8573375703154298	25.36259355193957	glucose
1.4726782466868387	1.851241761902659	1.4726782466868387	0.8782806898822574	0.5943975568045813	53.64243175383336	63.0	1.851241761902659	25.59399220119295	glucose
1.5697598047037449	1.9122068481727852	1.453521720169679	0.8782806898822574	0.5752410302874216	54.813181923871426	72.0	2.028444932706851	25.59399220119295	glucose
1.3669483436727732	1.9825401237335525	1.2451155818618351	0.7034733371688815	0.5416422446929536	58.00544520936364	93.0	2.1043728855444908	22.88211808546143	glucose
1.3142837925708981	2.7724658794419694	1.200112073482438	0.7034733371688815	0.49663873631355654	43.99157437117095	93.0	2.88663759853043	22.88211808546143	glucose
1.699694209211349	1.513513466094803	1.3170685225542704	0.7363391233434193	0.5807293992108511	55.510867958339915	69.0	1.8961391527518816	22.656588410566748	glucose
1.6935267566293337	2.0789133320834545	1.2669894660792518	0.7363391233434193	0.5306503427358324	49.3306946197429	78.0	2.5054506226335365	22.656588410566748	glucose
1.60877197857538	1.6090945184879997	1.3349473701664356	0.7267608600848395	0.6081865100815961	50.99262572850739	72.0	1.882919126896944	24.150150841596073	glucose
1.6434376959557822	1.5378845776256884	1.495861854254157	0.7267608600848395	0.7691009941693175	59.81678665304783	69.0	1.6854604193273135	24.150150841596073	glucose
1.5198015948052392	1.82711150263332	1.4358288727522865	0.6585342612771352	0.7772946114751513	50.04617878693694	66.0	1.9110842246862727	26.149141680174598	glucose
1.3994196390630365	2.195256525335582	1.332187242381532	0.6585342612771352	0.6736529811043969	50.696780803664325	84.0	2.2624889220170865	26.149141680174598	glucose
1.7354302078739268	2.2812072782809034	1.3462865197489107	0.6334947330396259	0.7127917867092848	39.64665209571848	72.0	2.6703509664059197	26.054257794297442	glucose
2.6619525238332034	2.4450195122538845	1.70630941438678	0.9256813715588168	0.7806280428279634	79.78864999232255	126.0	3.4006626217003078	30.08101961951444	glucose
1.9907625602411223	1.7231552447236902		0.9256813715588168		66.6947728478608			30.08101961951444	glucose
1.4622090852199883	2.1869719599010544	1.359529926627377	0.7179144363761433	0.6416154902512337	50.0218615407091	81.0	2.2896511184936656	23.38156299700368	glucose
1.5894068036038573	1.7923363411852515	1.4773351781081037	0.7179144363761433	0.7594207417319604	49.574091489833435	63.0	1.9044079666810052	23.38156299700368	glucose
1.7355785362352694	1.9395412954903342	1.359552179757809			55.433671189255875	90.0	2.3155676519677946	30.62711631140188	glucose
1.685309214690156	1.7544904397533618	1.3178174055256264			49.547696393945266	84.0	2.1219822489178917	30.62711631140188	glucose
2.7498807746665186	2.6694215399595667	1.8196699932234677	0.85315470719339	0.9665152860300775	58.2382583497357	96.0	3.5996323214026176	40.95311575128005	glucose
2.318392271497206	2.244488817858207	1.9170334349570382	0.85315470719339	1.0638787277636481	52.21021362638177	84.0	2.6458476543983744	40.95311575128005	glucose
2.2577123729803894	1.9827815888918714	1.4721093291282557	0.9585167174785191	0.5135926116497366	49.484774012021155	78.0	2.768384632744005	35.66757340764932	glucose
2.230502536112017	2.271358355044637	1.4721093291282557	0.9585167174785191	0.5135926116497366	47.3768667912037	81.0	3.029751562028398	35.66757340764932	glucose
2.973326725683223	2.1347452397049143	1.7034318695751234	0.9098349966117338	0.7935968729633895	61.48321749850483	87.0	3.404640095813014	42.30585807179259	glucose
2.2390827029975746	1.4529556912323964	1.586029040853098	0.9098349966117338	0.6761940442413642	54.05332441154616	84.0	2.106009353376873	42.30585807179259	glucose
1.9016007357006173	1.9469126363235458	1.4655204106331834	0.793014520426549	0.6725058902066343	58.99200980848572	78.0	2.38299296139098	34.447426199962685	glucose
1.6819183862692433	1.8711872502675124	1.4655204106331834	0.793014520426549	0.6725058902066343	58.38886330224274	81.0	2.087585225903572	34.447426199962685	glucose
2.2611535429614613	1.7466695466232198	1.3927972354771205	0.7360546645641278	0.6567425709129926	50.86224423305751	72.0	2.615025854107561	34.734036507390606	glucose
2.854918514156553	2.352506567072036	1.7020261645532786	0.8517159347875617	0.8503102297657169	62.275073814656	90.0	3.5053989166753103	45.7434880874342	glucose
2.1867123046086916	1.2791317248370855	1.7605754041800055	0.8517159347875617	0.9088594693924439	54.18069473929055	69.0	1.7052686252657716	45.7434880874342	glucose
1.782066729230926	1.3706654414295365	1.5444529319628273	0.8802877020900027	0.6641652298728244	58.319575612366776	57.0	1.6082792386976352	33.64172776321064	glucose
1.578153078405055	1.3412708194003933	1.604880836606826	0.8802877020900027	0.7245931345168231	50.70727905654056	51.0	1.3145430611986224	33.64172776321064	glucose
3.329522494340463	3.372004614997128	1.9933336883738615	0.8510130822766393	1.142320606097222	104.04542486123212	129.0	4.708193420963729	43.9218232947162	glucose
1.8722510819461096	1.7771491490696782	1.8033296404754775	0.8510130822766393	0.9523165581988382	56.08143689563801	87.0	1.8460705905403103	43.9218232947162	glucose
1.4279975601951005	1.8623000841178077	1.741962604578373	0.7722264659814136	0.9697361385969594	52.315822871332685	48.0	1.5483350397345352	27.416411218937323	glucose
2.0337571876200244	2.0538710941806113	1.4075673208983872	0.9016648202377388	0.5059025006606485	53.61842114319345	75.0	2.6800609609022485	28.803862799170915	glucose
1.6677452033475304	1.6718578693849446	1.3069615077512506	0.9016648202377388	0.40529668751351194	47.91481943074388	75.0	2.0326415649812244	28.803862799170915	glucose
3.656416618521082	1.5921465886974953	1.9928281792669178	0.9966668441869307	0.996161335079987	92.04358448586996	126.0	3.2557350279516593	51.223422989853276	glucose
2.582119737952472	1.9992933447698453	2.11596828956218	0.9966668441869307	1.1193014453752494	79.78368984078074	135.0	2.4654447931601373	51.223422989853276	glucose
1.8367575979668114	1.8193571370816286	1.5579053291101241	0.7037836604491936	0.8541216686609305	45.310371386306436	66.0	2.0982094059383156	31.288572117231144	glucose
1.9782043929562205	2.367199386822036	1.6195112460972612	0.7037836604491936	0.9157275856480677	44.92209675393545	69.0	2.7258925336809954	31.288572117231144	glucose
2.95978755773702	2.144088899112797	1.9127084353600246	0.9964140896334589	0.9162943457265657	72.50987912724423	99.0	3.1911680214897924	56.2525633618628	glucose
2.2541849517223933	1.1605301495599036	2.1903728982888	0.9964140896334589	1.1939588086553414	75.10523183867915	69.0	1.2243422029934967	56.2525633618628	glucose
1.9739780152742727	2.2674089964443813	1.3960599675835186	1.05798414478109	0.33807582280242854	40.78191777741289	102.0	2.8453270441351357	39.724919045422645	glucose
2.434925894941025	0.8422831559810349	1.3601438529642351	1.05798414478109	0.3021597081831451	83.996391777462	96.0	1.9170651979578248	39.724919045422645	glucose
1.6433977363872738	2.0541508451339574	1.4866298082381748	1.0951864491444	0.39144335909377487	61.54438357662323	87.0	2.2109187732830566	34.67976848803682	glucose
1.6655280178750684	1.9678447045339829	1.294437820544587	1.0951864491444	0.19925137140018706	55.98359079464869	93.0	2.338934901864464	34.67976848803682	glucose
2.87980520569224	2.4465873160113785	1.9156801223168396	0.9563542176800123	0.9593259046368273	57.485028572440925	81.0	3.410712399386779	45.53519319595415	glucose
2.187828619489526	1.3678931929347922	2.0287681858535582	0.9563542176800123	1.0724139681735458	55.66317689981325	63.0	1.52695362657076	45.53519319595415	glucose
1.73948624290243	1.6472230366040241	1.5310910511651579	1.0143840929267791	0.5167069582383788	43.69434070253156	54.0	1.8556182283412963	33.6589018383004	glucose
1.7292102330056347	2.5276295226901295	1.5310910511651579	1.0143840929267791	0.5167069582383788	43.85730360306009	69.0	2.725748704530606	33.6589018383004	glucose
2.9587811481590705	1.9550891117282743	1.8548258491841534	0.9578400611584198	0.8969857880257335	69.68576574360743	81.0	3.0590444107031916	44.30469547218831	glucose
2.3052613124321333	1.3305656314636365	1.6640758957281754	0.9578400611584198	0.7062358345697556	54.765076090132126	75.0	1.9717510481675944	44.30469547218831	glucose
1.9555248931169236	1.2568214672994529				41.895254518471475				glucose
2.2261825429315967	0.9095345880643118				42.490895122759696				glucose
1.6068533878215707	1.4341848662326548				48.895735259670424				glucose
1.6363925289807169	1.4222717353130983				53.19249722361222				glucose
1.4127739615753554	1.5576312396382024				53.16523974246209				glucose
1.4816089512853854	1.4950682442990517				56.62975141626598				glucose
1.5840791986912275	1.566914619434927				51.402872232319844			30.084998355644977	glucose
1.2451427652201803	1.6097987809755148				70.16664347513726			24.720821351101087	glucose
1.3238574614796463	1.7735983569211502				56.26517138537052			24.720821351101087	glucose
1.3926904998029332	1.9066735045238663				48.21936834082925			25.175269676626414	glucose
1.2831297045703143	1.9760738473603934				51.306743887773195			21.734984024236237	glucose
1.501576017769729	1.6312987457686339				56.54991322942677			21.734984024236237	glucose
1.2300356200542044	2.007312591628009				45.125304695270444			22.793983865929004	glucose
1.3342094894488505	1.675378909184739				53.681851355266744			22.793983865929004	glucose
1.5262241829065837	2.262290126739011				50.3177142109394			23.101169504149677	glucose
1.4438127791621191	1.9201912889653667				46.70998729723533			23.101169504149677	glucose
1.4605324674374118	1.5743416321827397				45.49149701145271			18.923624923910836	glucose
1.5196450799391912	2.679963647129406				49.09580177129105			19.74045699338945	glucose
1.5767207832106276	1.8934087740988688				50.085130370027244			19.74045699338945	glucose
1.6249308017532265	1.772642975191126	1.5318717043083359			47.9266284097191	60.0	1.8657020726360165	24.257242818625038	glucose
1.6395329966368806	1.7887616317048383	1.5318717043083359			50.74204780210636	63.0	1.896422924033383	24.257242818625038	glucose
1.8423254500787798	1.4174284368691352	1.360996158735694			47.3740730035492	63.0	1.898757728212221	23.48037204471667	glucose
1.8756512304116384	1.8046441027703504	1.4184193722312335			43.19077158237745	63.0	2.2618759609507553	23.48037204471667	glucose
2.019039665161305	1.4878607825859702	1.3177710049392384			60.26159383717496	81.0	2.189129442808037	23.379155075987555	glucose
1.8808112437612443	1.6743391502536358	1.2631225929971608			62.053951644060746	93.0	2.2920278010177193	23.379155075987555	glucose
1.6048581038354062	1.708489420558387	1.557587827403839	0.7659358521541679	0.7916519752496711	54.50144734375626	63.0	1.755759696989954	24.9989354115881	glucose
1.7678295523126348	1.7966719598104228	1.3771787416316024	0.6588855024696192	0.7182932391619832	53.374390710082096	75.0	2.1873227704914555	31.062148694789304	glucose
1.5681551837908727	1.8368229162328316	1.3304671271562565	0.6588855024696192	0.6715816246866373	48.275613658658635	78.0	2.074510972867448	31.062148694789304	glucose
1.7784246566204078	1.8849395355348968	1.453811705373774	0.6315612964985804	0.8222504088751936	51.795119190091896	72.0	2.2095524867815306	28.935557596326834	glucose
1.6390320835451622	1.70641720841033	1.453811705373774	0.6315612964985804	0.8222504088751936	43.71665891985823	63.0	1.891637586581718	28.935557596326834	glucose
1.6086972857204145	1.4551931054626126	1.5250678301172589	0.6885893708158012	0.8364784593014576	51.64223312142897	60.0	1.5388225610657682	27.19737772788669	glucose
1.831145629537012	1.631252360074392	1.3049969980645468	0.6885893708158012	0.6164076272487458	52.22926274771747	72.0	2.157400991546857	27.19737772788669	glucose
1.562091092041581	1.6762874361916056	1.3726174822153057	0.6652335635781282	0.7073839186371775	42.78408214951398	60.0	1.8657610460178808	24.125464366013425	glucose
1.5877316339339969	1.8876853344054594	1.155371591550373	0.6652335635781282	0.4901380279722449	47.77835109445624	81.0	2.320045376789083	24.125464366013425	glucose
1.8097807072265228	1.4416662156246731	1.2762265870045664	0.726905852686887	0.5493207343176794	49.68844293637659	69.0	1.9752203358466296	27.360379332621658	glucose
1.592157361785459	1.8884989378906314	1.4692017880607229	0.6863087411076528	0.78289304695307	42.538995666716865	54.0	2.0114545116153675	24.032170646793553	glucose
1.260284206275635	2.449884225056567	1.5423734184849094	0.6863087411076528	0.8560646773772564	38.51744874624679	63.0	2.167795012847293	24.032170646793553	glucose
1.5307037203980918	1.4764764812280582	1.5966892726342596	0.7625339150586294	0.8341553575756302	98.54074933301749	90.0	1.4104909289918903	24.7491890110833	glucose
1.5030851176822753	1.532327930690215	0.9837426221157036	0.7625339150586294	0.2212087070570742	73.96696718183138	108.0	2.0516704262567864	24.7491890110833	glucose
1.5096440282383654	1.4617842939353876	1.4763300704572475	0.6524984990322734	0.8238315714249741	70.628106697899	81.0	1.4950982517165055	28.17147122364634	glucose
1.6388687046096833	1.3404066280106497	1.3101192308457257	0.6524984990322734	0.6576207318134523	55.667587994546984	69.0	1.6691561017746073	28.17147122364634	glucose
1.4815601973716062	2.315644067140569	1.3317169590484754	0.6550596154228628	0.6766573436256125	46.3978901236744	72.0	2.4654873054636997	25.213364686302818	glucose
1.4091437417453938	2.2499319867904624	1.3601149230057767	0.7381650352286238	0.6219498877771529	45.762917162353475	72.0	2.298960805530079	23.225292742128698	glucose
1.5675827731916998	2.080826401874706	1.2451335877620653	0.7381650352286238	0.5069685525334415	51.69332924092965	81.0	2.4032755873043405	23.225292742128698	glucose
1.4898961075276684	1.75532156650196	1.3562830228133826	0.4918713110578518	0.8644117117555307	64.1080709589346	84.0	1.8889346512162457	23.124386425881156	glucose
1.3046533661080055	2.4444138332663927	1.3949533828429113	0.4918713110578518	0.9030820717850594	51.21924330008045	87.0	2.354113816531487	23.124386425881156	glucose
1.5807425626444647	2.525690505317755	1.381881867804548	0.7983446363171298	0.5835372314874181	50.09862343685292	81.0	2.7245512001576717	23.54928800612449	glucose
1.4090973600300356	2.2724935533254684	1.2971106158979933	0.7983446363171298	0.4987659795808634	49.799429858650704	90.0	2.384480297457511	23.54928800612449	glucose
1.919610515765214	1.8089241865014223	1.3557272251990635	0.690940933902274	0.6647862912967896	46.98290663611704	75.0	2.372807477067573	24.31911634837638	glucose
2.0403110889771012	1.526721336584035	1.3557272251990635	0.690940933902274	0.6647862912967896	48.3909877554194	69.0	2.211305200362073	24.31911634837638	glucose
1.9036231678847075	1.6034808201764101	1.162854939616596	0.6485553079489966	0.5142996316675994	47.64431259769111	75.0	2.3442490484445218	21.678420923539008	glucose
1.54643849971374	2.0730830946988394	1.3180417774498563	0.6485553079489966	0.6694864695008597	48.90575159732505	84.0	2.301479816962723	21.678420923539008	glucose
1.621250627881611	1.5685752445807135	1.6366369183785108	0.6778636125995318	0.958773305778979	46.08905966096415	51.0	1.5531889540838137	31.389401368878477	glucose
1.6984547127797478	1.6451017253949753	1.5018536884638136	0.6778636125995318	0.8239900758642819	55.262147735651865	66.0	1.8417027497109095	31.389401368878477	glucose
1.564778250630457	2.7275947581611613	1.4097577239073928	0.581427469808298	0.8283302540990949	47.39605948803545	84.0	2.882615284884226	29.286510275149347	glucose
1.6747937795933932	2.100944118628277	1.5617859399170944	0.6778636125995318	0.8839223273175625	63.95087725423883	87.0	2.213951958304576	29.532469473310982	glucose
1.7700868600167656	1.756783967202398	1.494169398224153	0.6778636125995318	0.8163057856246214	93.50788048259449	108.0	2.0327014289950105	29.532469473310982	glucose
1.4211576437856328	2.163021420203761	1.2728133084114377	0.8183184591892554	0.4544948492221824	47.205999784779685	78.0	2.311365755577956	24.942317352024784	glucose
1.3878399555384258	2.057147380907221	1.3315551609123333	0.8183184591892554	0.5132367017230779	43.45646725312317	69.0	2.1134321755333136	24.942317352024784	glucose
1.8187150522426496	2.950067523460591	1.6576214708950978	0.7808929699585472	0.8767285009365507	49.61524880681725	81.0	3.1111611048081427	25.766058147590662	glucose
1.6911129080908467	2.418073397108518	1.553252722314789	0.7808929699585472	0.7723597523562418	51.52708492649252	84.0	2.5559335828845757	25.766058147590662	glucose
1.5819197421548055	2.1843980074050124	1.4760339223773211	0.7470846991120765	0.7289492232652446	69.51778480092005	111.0	2.2902838271824963	27.23210553871947	glucose
1.6210820670692816	2.1855074495616833	1.5025757672023956	0.6364066542057188	0.8661691129966768	36.53956139253583	57.0	2.3040137494285693	21.863963750548198	glucose
2.0242229263511544	1.2030904136090355	1.6791646570651009	0.7766263611573945	0.9025382959077065	53.4945719893572	51.0	1.548148682895089	26.017121662936102	glucose
1.9541330944699575	1.9533837507983918	1.3723368745626932	0.7766263611573945	0.5957105134052986	60.01660292074147	90.0	2.535179970705656	26.017121662936102	glucose
2.347076573015386	1.4279027870377385	1.8542417066246086	0.8288107354475489	1.0254309711770597	56.88416163668356	57.0	1.920737653428516	27.980231572963838	glucose
2.179062308562735	1.526200859652742	1.705150113229951	0.8288107354475489	0.876339377782402	62.6739393954694	72.0	2.000113054985526	27.980231572963838	glucose
1.5410077069414199	2.4038390294753817	1.5410077069414199	0.8395823285325504	0.7014253784088693	46.456916332365715	63.0	2.4038390294753817	31.14189117463314	glucose
1.5219560613682976	2.030356156774862	1.38128577573151	0.8395823285325504	0.5417034471989597	44.15979805992885	66.0	2.171026442411649	31.14189117463314	glucose
1.4611764908707157	2.15787835807552	1.5437428112021852	0.9271208533123043	0.6166219578898808	75.66016210830955	93.0	2.075312037744051	36.10887035408286	glucose
1.962411813487361	2.141248350043534	1.4686682170981389	0.8525750566149755	0.6160931604831633	53.557161523560225	78.0	2.6349919464327565	33.52403551634977	glucose
1.844872766867154	1.3717102811555126	1.4686682170981389	0.8525750566149755	0.6160931604831633	52.36858009281593	63.0	1.7479148309245278	33.52403551634977	glucose
1.9306106451646579	1.7568113615442584	1.6254303698395742	0.7343341085490694	0.8910962612905048	51.416343735228736	66.0	2.061991636869342	30.19095097672863	glucose
2.1121443133196243	2.036663862180462	1.5039868152293092	0.7343341085490694	0.7696527066802398	55.44213057856658	78.0	2.644821360270777	30.19095097672863	glucose
1.841680780670025	1.8237783259259837	1.4928364044431712	0.7718714056010926	0.7209649988420787	54.382258870009096	75.0	2.1726227021528377	22.479638321087933	glucose
1.8114212783145243	1.6106017459983508	1.4928364044431712	0.7718714056010926	0.7209649988420787	52.30311555686332	69.0	1.9291866198697039	22.479638321087933	glucose
1.6729525788199817	1.8456420619126552	1.5683240808892824	0.8127151849197871	0.7556088959694952	41.95402193954078	57.0	1.9502705598433545	29.701702233302427	glucose
2.2686179616173505	1.8010670261168475	1.8403463703896157	1.0506167708089877	0.789729599580628	92.515337237468	99.0	2.2293386173445824	28.78663614521655	glucose
1.8122431117997626	1.7271642385779689	1.8762667280061385	1.0506167708089877	0.8256499571971508	118.045256823531	132.0	1.663140622371593	28.78663614521655	glucose
1.5329642058556365	1.9590690029388862	1.6443204771636464	0.7464182022215856	0.8979022749420608	47.99016887007249	60.0	1.8477127316308763	27.868019666377297	glucose
1.8596772934960746	1.3310098549204028	1.3497325028847538	0.7464182022215856	0.6033143006631682	50.076085962292346	63.0	1.8409546455317236	28.33355047184654	glucose
1.710359590498216	2.118622268980386	1.4023423214212352	0.7464182022215856	0.6559241191996497	46.4451744168401	75.0	2.4266395380573673	28.33355047184654	glucose
1.4566964269623348	1.7816575589971198	1.4084815351521907	0.6748662514423769	0.7336152837098138	54.66090773582359	72.0	1.829872450807264	28.610419899939608	glucose
1.497229639300089	1.7824053850292259	1.5304525555361659	0.6748662514423769	0.8555863040937891	47.73523874954431	57.0	1.749182468793149	28.610419899939608	glucose
2.169304305423333	2.035662853160974	1.662176547613581	0.9201731851948078	0.7420033624187732	62.83629938699441	87.0	2.5427906109707266	34.901814794113086	glucose
1.8180382061341105	1.6794045179218158	1.6999598600907984	0.9201731851948078	0.7797866748959904	76.27781928814716	96.0	1.797482863965128	34.901814794113086	glucose
1.8575832290757295	2.013570075998681	1.3350410506323132	0.9381333640030692	0.39690768662924397	48.14333846271916	99.0	2.5361122544420978	27.880663258457886	glucose
2.0319490166304957	2.0314466072247312	1.7238519861021764	0.8310882738067905	0.8927637122953859	57.01016877577733	75.0	2.3395436377530503	33.3739123911282	glucose
2.0904088645371837	1.6832411705734303	1.6134509257293292	0.8310882738067905	0.7823626519225386	49.28562324015898	66.0	2.160199109381285	33.3739123911282	glucose
1.5657650424467342	2.5980409716962187	1.484853865839751	0.8499799300453992	0.6348739357943519	46.77417249212918	84.0	2.6789521483032015	27.96981855590939	glucose
1.91651706597805	2.3010276256607978	1.527965793936052	0.8067254628646646	0.7212403310713874	55.36434296656748	78.0	2.6895788977027957	32.160136377495135	glucose
1.6881421357816107	1.747754184378546	1.527965793936052	0.8067254628646646	0.7212403310713874	46.81784364383394	63.0	1.9079305262241046	32.160136377495135	glucose
2.232161513781812	1.4194595148161189	1.755883431917865	0.8619259930510882	0.8939574388667767	80.27087879414913	69.0	1.8957375966800658	31.260754102007628	glucose
1.787737405826161	1.5860830621577584	1.692991676688753	0.8619259930510882	0.8310656836376648	55.66176370411512	66.0	1.6808287912951665	31.260754102007628	glucose
1.4951379480185034	2.2432886641400924	1.3160531060515952	0.763982896968026	0.5520702090835692	38.57345931672602	69.0	2.4223735061070006	25.97141747356324	glucose
1.873901027476627	2.183854320656149	1.5614770355164478	0.763982896968026	0.7974941385484219	56.520636605704375	87.0	2.4962783126163286	29.484877938123844	glucose
1.9858076703919354	1.705272852021553	1.5039168993029144	0.763982896968026	0.7399340023348883	50.31771109941089	72.0	2.1871636231105738	29.484877938123844	glucose
1.5257866420222779	1.7893592686988449	1.5080584195396776	0.8464958383443765	0.6615625811953011	53.594439142642656	69.0	1.8070874911814452	27.503652397325553	glucose
1.5226867366826213	1.817719794567545	1.5080584195396776	0.8464958383443765	0.6615625811953011	52.93785110674426	69.0	1.8323481117104887	27.503652397325553	glucose
1.663652727230123	1.8140688769998359	1.7155590927220215	0.8779417159589324	0.8376173767630891	67.68265013131492	69.0	1.7621625115079373	34.340946365874025	glucose
1.463467033023631	2.1402429225280772	1.463467033023631	0.8779417159589324	0.5855253170646987	59.99572398875735	78.0	2.1402429225280772	34.340946365874025	glucose
1.4891054889623019	1.647458815787975	1.4754392290926288	0.7540292097698388	0.72141001932279	47.45337367679248	60.0	1.661125075657648	23.47364064649658	glucose
1.548471730646247	1.8953820737296458	1.4754392290926288	0.7540292097698388	0.72141001932279	49.428585821887054	66.0	1.968414575283264	23.47364064649658	glucose
1.737825973502202	1.9359779915978836	1.7953184250741574	0.8577795463610107	0.9375388787131466	63.88941960819607	66.0	1.8784855400259282	25.59465734200189	glucose
1.5298077945533088	1.8591871092053536	1.5298077945533088	0.8577795463610107	0.6720282481922982	60.13034881185112	69.0	1.8591871092053536	25.59465734200189	glucose
1.8323817610193769	1.4987120300885495	1.463539332919567	0.7317335165118155	0.7318058164077514	62.624969606866685	72.0	1.8675544581883594	22.514877431132785	glucose
1.6159920257701135	1.582532150611934	1.5151546786082146	0.7317335165118155	0.7834211620963991	54.823097036193786	69.0	1.683369497773833	22.514877431132785	glucose
1.5578249345605972	1.8041113910388888	1.558531750288278	0.7317696664597835	0.8267620838284947	51.3624898242567	63.0	1.803404575311208	28.190488631067335	glucose
1.7018174513606372	2.1896378620611623	1.8287219385208684	0.8976592125370787	0.9310627259837897	57.82606680907542	63.0	2.0627333749009313	26.735784207726184	glucose
1.3535236875487946	2.128436709912167	1.6232329662516112	0.8976592125370787	0.7255737537145325	57.219163675560154	63.0	1.8587274312093507	26.735784207726184	glucose
1.6382783347598429	1.7166848945721889	1.5812596063972273	0.7649038972766544	0.8163557091205728	58.020543830608545	66.0	1.7737036229348044	23.535504531589368	glucose
1.6065726436640373	1.741823786215975	1.5812596063972273	0.7649038972766544	0.8163557091205728	59.46290115302749	69.0	1.767136823482785	23.535504531589368	glucose
1.5955506481929258	1.5034125838571488	1.5955506481929258	0.7906298031986136	0.8049208449943123	53.25084769234403	51.0	1.5034125838571488	25.204282073228352	glucose
1.6252640023847889	1.7009470562390687	1.4534421600673122	0.7906298031986136	0.6628123568686984	52.26452349636797	66.0	1.8727688985565454	25.204282073228352	glucose
1.9071770186793984	1.823953247017715	1.877001851232604	0.9143609692604342	0.96264088197217	71.26818308567631	72.0	1.8541284144645094	26.181806944009804	glucose
1.5540725231172137	1.7602132528723478	1.7467469708639998	0.9143609692604342	0.8323860016035656	63.14956106383775	78.0	1.5675388051255617	26.181806944009804	glucose
1.63753956966156	1.2983642207049142	1.3017567607507865	0.8116164831258056	0.49014027762498097	64.11208324644927	78.0	1.6341470296156877	20.82344134690453	glucose
1.644156567185183	2.0042868640848277	1.255298018157116	0.8116164831258056	0.4436815350313106	57.39462840426048	93.0	2.3931454131128946	20.82344134690453	glucose
1.350963793779952	1.966580805246681	1.4211035094333004	0.6508783803753933	0.7702251290579072	53.23553015336327	72.0	1.8964410895933326	25.19291645633169	glucose
1.7589054160725173	4.230755082610265	1.660059150300462	0.938500925616302	0.72155822468416	62.7900388338006	123.0	4.32960134838232	29.341184902759974	glucose
1.6930893406533014	1.873175515164465	1.660059150300462	0.938500925616302	0.72155822468416	61.40930169014374	78.0	1.9062057055173043	29.341184902759974	glucose
1.595525758127664	2.5009636853741073	1.3600506633135387	0.8733734854319999	0.4866771778815389	48.516704760947846	84.0	2.736438780188233	23.908808047957134	glucose
1.29230445329657	2.2107365051270698	1.4055810661760837	0.8733734854319999	0.5322075807440838	45.875964121605016	81.0	2.0974598922475565	23.908808047957134	glucose
1.6708504801090394	1.8155833806074515	1.4552819054819106	0.830029575150231	0.6252523303316795	65.02260147547673	87.0	2.0311519552345803	26.047528317743097	glucose
1.756959198402088	1.4227449293907577	1.4552819054819106	0.830029575150231	0.6252523303316795	73.61431219571519	81.0	1.7244222223109351	26.047528317743097	glucose
2.03168024089132	1.9725818774190174	1.3926944217977437	0.6800253316567694	0.7126690901409743	45.9717012459309	72.0	2.6115676965125934	24.546550125040984	glucose
2.9602043440905064	2.0119673094044357	1.4939484531146787	0.830029575150231	0.6639188779644478	48.11680617256377	99.0	3.4782232003802633	27.060083324192572	glucose
2.6001265560720013	1.4697992231482706	1.445283077938525	0.830029575150231	0.6152535027882942	51.05035013663509	99.0	2.624642701281747	27.060083324192572	glucose
2.0180974730524057	1.7956772702088366	1.3000632780360006	0.7226415389692625	0.577421739066738	52.27483886436683	81.0	2.5137114652252417	40.00194701649232	glucose
1.8464199906737064	2.0755648391812196	1.3000632780360006	0.7226415389692625	0.577421739066738	46.92446017548089	84.0	2.621921551818925	40.00194701649232	glucose
1.9663952320059304	2.2522217380662743	1.4801021720452532	0.7469742265573394	0.7331279454879137	57.20944420697707	99.0	2.7385147980269515	45.541605293700094	glucose
2.100738203448822	2.335144894914163	1.889690881587915	0.7727346772660132	1.1169562043219017	55.641853858455505	66.0	2.54619221677507	43.25067729004798	glucose
1.8029850594157557	1.3935278715701889	1.7907068538911568	0.7727346772660132	1.0179721766251435	54.472066592275866	57.0	1.4058060770947878	43.25067729004798	glucose
1.7971332056274703	3.0337882980067192	1.6263792236110095	0.6500316390180003	0.9763475845930092	42.0580087294357	72.0	3.2045422800231798	31.047653431575473	glucose
1.8132419942958449	1.2704310685377234	1.4665041567915924	0.7400510860226266	0.7264530707689659	70.48887484648984	84.0	1.6171689060419758	30.252234338552775	glucose
1.8440086808173284	1.7369673713625535	1.4665041567915924	0.7400510860226266	0.7264530707689659	56.396429612868126	84.0	2.1144718953882897	30.252234338552775	glucose
1.535543742605773	2.2942599810895468	1.535543742605773	0.8953534269455784	0.6401903156601946	52.33136830538875	69.0	2.2942599810895468	27.738231683319317	glucose
1.661575145197497	1.7803037483450967	1.42531088698921	0.8953534269455784	0.5299574600436316	54.25239842510896	66.0	2.016568006553384	27.738231683319317	glucose
2.4985082993119203	2.0815941891061067	1.9827085202966959	0.9448454407939575	1.0378630795027384	68.62531933589484	69.0	2.597393968121331	32.31904928382803	glucose
1.8373719277786835	1.6360297538844686	1.9827085202966959	0.9448454407939575	1.0378630795027384	58.77835273560593	63.0	1.4906931613664562	32.31904928382803	glucose
1.6404836003353407	1.7653641193437593	1.4551352665266302	0.9913542601483479	0.4637810063782821	51.23860989546634	69.0	1.9507124531524698	28.26726042736436	glucose
1.6302611904145128	2.309992183793681	1.4551352665266302	0.9913542601483479	0.4637810063782821	51.83848806637558	81.0	2.485118107681564	28.26726042736436	glucose
1.6169593891436649	2.1597404454044002	1.3934435032474817	0.7677718713028865	0.6256716319445953	41.672022736525555	75.0	2.3832563313005837	23.62374988624266	glucose
2.571064760611472	2.316853954159195	2.0910578148401817	0.9913542601483479	1.0997035546918337	64.73509067322846	69.0	2.796860899930485	38.43858922018339	glucose
1.8935958236001305	2.118475475747016	2.028646241228267	0.9913542601483479	1.0372919810799188	47.081900053537375	63.0	1.98342505811888	38.43858922018339	glucose
1.7145300789060167	1.3698333706004768	1.3901744573366628	0.7275676332633151	0.6626068240733477	53.11868270767624	60.0	1.6941889921698308	25.238209235928316	glucose
1.9741523203964153	1.8027097222925605	1.608541854244866	1.0143231206141334	0.5942187336307326	57.695095128053815	69.0	2.1683201884441097	29.132243440002007	glucose
1.7916071049794997	1.5395774902088415	1.348054160000259	1.0143231206141334	0.33373103938612564	46.93885940064351	69.0	1.9831304351880823	29.132243440002007	glucose
2.7311255080417625	1.7178598078926188	1.8901209495384628	1.0455289074200909	0.8445920421183719	85.22960654067481	84.0	2.5588643663959187	39.55484247094572	glucose
1.999081524705939	1.62454409530114	1.8901209495384628	1.0455289074200909	0.8445920421183719	55.93775798723402	72.0	1.7335046704686163	39.55484247094572	glucose
1.7803512023789794	2.0029386478781244	1.6348951745270237	0.804270927122433	0.8306242474045907	49.656110898822405	66.0	2.14839467573008	30.37157415994485	glucose
1.613466403463881	2.029831937693081	1.5044943838025309	0.9450604747692314	0.5594339090332994	48.50726956793074	72.0	2.1388039573544315	30.755100380091367	glucose
1.8117088701747321	1.8195996245927728	1.449592788782453	0.9450604747692314	0.5045323140132215	44.85921581148653	63.0	2.1817157059850523	30.755100380091367	glucose
2.611022228002944	1.8979791418649263	1.9690246280298151	0.9450604747692314	1.0239641532605839	72.31729399644078	72.0	2.539976741838055	42.017315508334804	glucose
1.7181117482084851	1.248579636067369	1.8752501843257723	0.9450604747692314	0.9301897095565409	57.104353852808615	66.0	1.091441199950082	42.017315508334804	glucose
1.4890965994019651	1.8344577025016686	1.4303016638003876	0.9376250921628861	0.4926765716375014	64.75064728056962	78.0	1.8932526381032462	26.432488433976694	glucose
1.3177252757188116	2.0338048780571114	1.3177252757188116	0.9376250921628861	0.38010018355592534	51.23368140904631	69.0	2.0338048780571114	26.432488433976694	glucose
1.707766861293011	2.6785854967393505	1.6018132278119088	0.7522471919012654	0.8495660359106435	44.08812510869063	69.0	2.7845391302204527	24.822560053290477	glucose
2.5420329401389066	2.6967397579175194	2.0095500865023532	0.9845123140149076	1.0250377724874458	66.13971259941056	81.0	3.2292226115540728	40.16957273850683	glucose
1.8357500621971758	1.4754896318272008	1.8434662151094234	0.9845123140149076	0.8589539010945157	59.92936798908787	72.0	1.4677734789149532	40.16957273850683	glucose
1.598301822921018	1.7836756994062746	1.598301822921018	0.9217331075547117	0.6765687153663064	52.712999406676744	57.0	1.7836756994062746	28.24230864918732	glucose
1.5134366767624943	2.159524689613315	1.5134366767624943	0.9217331075547117	0.5917035692077827	44.56204626420568	57.0	2.159524689613315	28.24230864918732	glucose
3.005738541608519	1.913570412051766	2.036879513540993	1.0047750432511766	1.0321044702898166	59.093659816550655	66.0	2.882429440119292	39.1081990790601	glucose
2.145444083323501	1.6451876648992165	2.036879513540993	1.0047750432511766	1.0321044702898166	51.14703261237407	66.0	1.7537522346817243	39.1081990790601	glucose
1.6368419484396672	2.0763003531693	1.4441486395542922	0.799150911460509	0.6449977280937831	40.6185672236775	60.0	2.268993662054675	24.589258814169508	glucose
2.909555587770347	2.4385837696809514	2.1367056758337486	1.0184397567704966	1.1182659190632518	68.31859129531492	72.0	3.21143368161755	46.242131409361825	glucose
2.000721765841132	1.6319695746533447	2.062824846218025	1.0184397567704966	1.0443850894475282	55.78034004996485	63.0	1.5698664942764515	46.242131409361825	glucose
1.822356590961697	1.6666857556961339	1.425884677689841	1.0184397567704966	0.40744492091934453	51.22590962698863	69.0	2.06315766896799	33.00683205113078	glucose
1.6220415584170764	1.9056047001461227	1.6108482507793174	1.0184397567704966	0.5924084940088207	48.17578312252233	66.0	1.9167980077838818	33.00683205113078	glucose
1.7097024310838316	1.5455355718788903	1.6241575868169662	1.0314124231090125	0.5927451637079538	54.896688945594036	60.0	1.6310804161457557	30.78033485909433	glucose
1.7768126875130654	2.075036342159372	1.5647251120201835	1.0314124231090125	0.5333126889111711	48.37584552369901	66.0	2.287123917652254	30.78033485909433	glucose
1.5938627471808395	2.0829255926546715	1.5444988174298993	0.7129423388449205	0.8315564785849787	42.29140720286516	60.0	2.1322895224056118	28.03625524556457	glucose
3.0662546382882545	1.6887422953797881	1.9723532107388209	1.0683528379168743	0.9040003728219466	85.31251797417802	84.0	2.7826437229292216	44.76239365800534	glucose
2.0644492610323772	1.4418285526231434	1.9132243015389694	1.0683528379168743	0.8448714636220952	66.73791057676878	84.0	1.5930535121165512	44.76239365800534	glucose
1.8288858672990205	1.5842409302679712	1.4095909609880783	0.9566121507694847	0.4529788102185937	53.32569200740856	69.0	2.003535836578913	31.760757862036574	glucose
1.574495659311445	2.26643860245283	1.4095909609880783	0.9566121507694847	0.4529788102185937	44.30393302802213	78.0	2.431343300776197	31.760757862036574	glucose
2.7013397296114565	2.1990124657499663	2.0540274247433623	0.9861766053694104	1.0678508193739518	59.35682673933114	69.0	2.8463247706180606	47.17314828135776	glucose
2.123558749033382	1.4941581107421893	2.0045669694069836	0.9861766053694104	1.0183903640375733	62.45157741500588	69.0	1.6131498903685877	47.17314828135776	glucose
1.6546561734249177	2.4193361616956577	2.012684427973318	1.0022834847034918	1.010400943269826	53.08052437497716	54.0	2.0613079071472575	32.67013460051357	glucose
1.706850037023977	1.8377010476895634	1.4812921391226437	1.0022834847034918	0.4790086544191518	48.374860179623724	69.0	2.0632589455908965	32.67013460051357	glucose
2.750663602717805	2.5370001427243203	1.7875819380920472	1.0270137123716812	0.7605682257203661	54.09127745186967	78.0	3.500081807350078	41.55907276325318	glucose
2.0691640109355225	1.1541581118753905	1.7260420205080615	1.0270137123716812	0.6990283081363804	60.985109610412586	69.0	1.4972801023028515	41.55907276325318	glucose
1.5257949718609336	2.109375439018189	1.5257949718609336	0.8630210102540308	0.6627739616069027	47.905649503359	60.0	2.109375439018189	31.833292475931113	glucose
1.4935635353397385	2.0714689501022	1.5576337352662422	0.8630210102540308	0.6946127250122115	47.80279958737715	63.0	2.007398750175696	31.833292475931113	glucose
2.8755633163361236	2.1867848452375154	1.800019285483513	0.8937909690460236	0.9062283164374895	66.17954214822078	84.0	3.262328876090126	42.31790158027392	glucose
2.2291828490672048	1.3883762087608185	1.800019285483513	0.8937909690460236	0.9062283164374895	55.83380110178177	69.0	1.8175397723445101	42.31790158027392	glucose
1.706685357150705	1.653563106570244	1.5584296132939854	0.9000096427417565	0.658419970552229	58.31972858186392	69.0	1.8018188504269637	34.295120754880074	glucose
1.5310179229802658	2.146885393068242	1.5584296132939854	0.9000096427417565	0.658419970552229	45.08094224960056	69.0	2.1194737027545223	34.295120754880074	glucose
1.6925675193768974	1.6972878052687554	1.400832472249231	0.7628974859304668	0.6379349863187642	44.90971729815811	63.0	1.989022852396422	23.473768797860515	glucose
2.9229868042388634	2.90321397199256	2.232224012550086	0.9000096427417565	1.3322143698083293	60.29471436621442	72.0	3.5939767636813373	44.23943563594036	glucose
2.1637090356717397	1.8701888252313705	2.0314194033477886	0.9000096427417565	1.131409760606032	56.75065454569727	72.0	2.0024784575553216	44.23943563594036	glucose
2.002726730178151	1.1865823388814332	1.5044873161193966	1.0157097016738943	0.4887776144455023	58.09810643246455	63.0	1.6848217529401874	33.28783131802676	glucose
1.8678567286574066	1.9434627279604388	1.5606367413372395	1.0157097016738943	0.5449270396633451	49.56717469553135	72.0	2.2506827152806057	33.28783131802676	glucose
3.4802571989027977	1.685988390236378	2.135768046448656	1.116112006275043	1.0196560401736132	63.166505506321144	63.0	3.0304775426905195	44.969027757520976	glucose
2.387872095994451	1.4617451215913642	2.3685789945616404	1.116112006275043	1.2524669882865973	56.60464130208567	57.0	1.4810382230241745	44.969027757520976	glucose
1.4149205191062166	2.2911495923538228	1.3819416804866569	0.7522436580596983	0.6296980224269585	43.191284197213214	72.0	2.3241284309733823	30.811180464279243	glucose
2.7857479286302462	2.7897465662645473	2.2644208730970883	1.067884023224328	1.1965368498727604	59.93796154895641	72.0	3.3110736217977053	53.54241844465842	glucose
1.9271580640782233	1.7539245818336016	2.2644208730970883	1.067884023224328	1.1965368498727604	61.05037259093572	69.0	1.4166617728147366	53.54241844465842	glucose
1.8589204497307246	1.5584319251777554	1.6617671579772488	1.1842894972808202	0.4774776606964286	61.47443120786295	66.0	1.7555852169312312	36.73649378453001	glucose
1.7037890297088907	2.4866634622540555	1.855381437077214	1.1842894972808202	0.6710919397963938	48.522776787232274	66.0	2.3350710548857325	36.73649378453001	glucose
1.8151820340717553	1.430941905899573	1.6617586839283816	1.1322104365485441	0.5295482473798374	60.81536596677836	60.0	1.5843652560429466	29.648585601203436	glucose
3.325087328491884	1.8622151486113645	2.1866730094713986	1.1322104365485441	1.0544625729228543	70.1380025815549	66.0	3.0006294676318497	42.857660440465324	glucose
2.213052773780123	1.7781927667642523	2.1121111325187	1.1322104365485441	0.9799006959701559	49.36523472324117	66.0	1.879134408025675	42.857660440465324	glucose
1.9327476374321597	1.4403066435172474	1.4247086610652455	1.05605556625935	0.3686530948058953	56.011791599337	69.0	1.9483456198841616	34.04696575046343	glucose
1.8077272156059618	1.16823304198594	1.7587183941501399	1.05605556625935	0.7026628278907898	62.57141246425044	54.0	1.2172418634417619	34.04696575046343	glucose
3.160849680020585	2.1035033618341923	2.1075615622415653	1.0933365047356993	1.014225057505866	85.60436080510958	84.0	3.156791479613212	51.1551896691059	glucose
2.050004594580726	1.300698832180435	2.3729242457559145	1.0933365047356993	1.2795877410202152	63.48428369953569	54.0	0.9777791810052463	51.1551896691059	glucose
1.5293637389105825	2.1875442031501215	1.5293637389105825	0.7123543305326228	0.8170094083779599	49.173748970198034	63.0	2.1875442031501215	29.73457903741784	glucose
1.639101573790149	1.9956157501586043	1.4696176281244122	1.1864621228779573	0.2831555052464549	52.22214320580668	72.0	2.165099695824341	31.53853222431886	glucose
1.4602377776436148	1.7834964860859903	1.4696176281244122	1.1864621228779573	0.2831555052464549	49.502700849733834	69.0	1.774116635605193	31.53853222431886	glucose
3.2260071822530474	2.1917645482052848	2.1152845522623647	1.0537807811207827	1.061503771141582	76.20830691107282	84.0	3.3024871781959675	48.6284566157013	glucose
1.9570932931598741	1.1643057202006224	2.1672967364648468	1.0537807811207827	1.1135159553440641	57.908155954138884	63.0	0.9541022768956497	48.6284566157013	glucose
1.532149549614805	1.6983244520303151	1.258195186015548	1.0836483682324234	0.17454681778312467	58.539917330067894	81.0	1.972278815629572	30.109127587074987	glucose
1.507491984749769	1.7102890117751708	1.3041971040066855	1.0836483682324234	0.22054873577426223	60.333710823811536	81.0	1.9135838925182542	30.109127587074987	glucose
1.633368677188166	1.8864761128740244	1.3752700160099973	0.7348088140622061	0.6404612019477913	48.75136263689115	75.0	2.144574774052193	25.216947289079215	glucose
2.96295171311816	3.0766338644209115	1.9524832360901307	1.0576422761311823	0.8948409599589483	64.23892560496529	102.0	4.087102341448941	49.63087972696996	glucose
2.221282728288052	1.3274211293489935	2.061996288773126	1.0576422761311823	1.0043540126419437	53.26238371367011	66.0	1.4867075688639195	49.63087972696996	glucose
1.7345406175137208	1.7730784262135917	1.459695592716469	1.030998144386563	0.428697448329906	50.19989186867117	66.0	2.0479234510108437	34.1735804352008	glucose
1.7526914605503152	1.9933628934127676	1.3500545295387285	1.030998144386563	0.31905638515216556	52.01680169825976	78.0	2.3959998244243543	34.1735804352008	glucose
2.799778557045917	2.17898998631705	1.858243692078276	0.9762416180450654	0.8820020740332107	72.24770356376806	105.0	3.1205248512846904	45.58387250951015	glucose
3.3878600821496567	3.421021617907929	3.7183092655458903	0.9762416180450654	2.742067647500825	44.68525606606156	39.0	3.0905724345116954	45.58387250951015	glucose
1.561020203573071	2.62790589831542	1.548862218968398	0.7298477963582345	0.8190144226101634	35.812312544761014	60.0	2.640063882920093	26.685240269441856	glucose
4.065069774537707	1.5137590944081136	1.7746204899801907	1.8591546327729451	-0.08453414279275454	52.5529590586561	66.0	3.80420837896563	52.12092434076395	glucose
2.5867923656049374	0.8333331037166456	1.8591546327729451	1.8591546327729451	0.0	52.12405596056499	60.0	1.5609708365486379	52.12092434076395	glucose
3.0010446618976427	2.2813256828533897	2.4187558268154286	0.929121846039138	1.4896339807762904	73.55459138186554	63.0	2.863614517935604	43.07351626224487	glucose
2.0935209289883443	1.2233707950669146	2.4187558268154286	0.929121846039138	1.4896339807762904	72.2999823473302	51.0	0.8981358972398303	43.07351626224487	glucose
2.431837839544069	1.5624616992992775		0.8873102449900954		46.09611338238928			62.5395349928878	glucose
2.695754405788428	1.6613761198911399		0.8873102449900954		47.640409130614024			62.5395349928878	glucose
1.7232262871679407	2.1628126437722113	1.2159189197720346			48.585555520639076	90.0	2.670120011168118	37.412889839139524	glucose
1.7160373996516187	2.193402137404794	1.3921274109673114			37.882588894673454	69.0	2.5173121260891014	37.412889839139524	glucose
1.4731234177066346	2.465447209022554	1.527768789098669	1.2093779134077143	0.3183908756909549	57.0907467794664	78.0	2.4108018376305194	32.208014292128375	glucose
3.0788255996398632	2.0459927763008388	2.106571942465771	1.2093779134077143	0.8971940290580568	61.2144349569684	69.0	3.018246433474931	46.16991787534835	glucose
2.193729216560387	1.5332620071953391	2.047851573346792	1.2093779134077143	0.8384736599390777	51.005330464149	66.0	1.6791396504089344	46.16991787534835	glucose
1.964387099704306	1.521712330697901				47.12794649830026				glucose8a
2.052987593396029	1.4082413334100052				39.81105904974415				glucose8a
1.9727673636419603	2.862038366973123				34.796403982857655				glucose8a
1.8395771375387515	3.1537578817224823				43.73088194881529				glucose8a
1.4720959399041793	2.394520466954794				45.2196399085289				glucose8a
2.3206293138625735	1.9735267020225207				40.54700082781377			28.30118673136541	glucose8a
1.7580027940882792	2.939662504827532				33.850336960860716			22.64762984467968	glucose8a
1.8225704422816202	2.5445363639660945				33.31473948423927			22.64762984467968	glucose8a
2.139813367674166	2.089073425578424				48.840398276845555			39.128972267029404	glucose8a
2.1320654460931867	2.0018318101950716				43.9675105429734			39.128972267029404	glucose8a
2.096773457463429	2.406411077367553				46.2469845446526			35.70198944403959	glucose8a
1.9771885535601796	1.904095363291188				52.41071236382291			35.70198944403959	glucose8a
2.2626016401537234	3.206418700088911				35.341244139379604			32.8010068629721	glucose8a
1.754472220402109	3.003308985699957				31.26624490170813			32.8010068629721	glucose8a
2.136717475951535	1.8880232973923912				49.261099806188994			32.92020565652563	glucose8a
1.8036078672919338	2.2584297609909028				51.224351828146084			32.92020565652563	glucose8a
2.4419159042451826	2.2828845525514376	2.161055026296937			34.65513317927204	45.0	2.5637454304996834	34.809256002364975	glucose8a
2.148491053437026	2.1241334841326656	1.629462289150694			39.32249263673518	54.0	2.6431622484189976	32.87257655310054	glucose8a
1.8232344344880043	3.2535586834214474	1.629462289150694			36.550266868994456	69.0	3.4473308287587576	32.87257655310054	glucose8a
2.1215079973303625	3.0898798947390462	1.467821409621999			37.02053993556566	72.0	3.7435664824474095	27.747813342952828	glucose8a
2.159773847490683	1.8796149345563307	1.6399609663550432	0.814731144575347	0.8252298217796962	39.85577722499771	51.0	2.39942781569197	33.05370851441578	glucose8a
1.8690045676599496	1.8501566561501708	1.6399609663550432	0.814731144575347	0.8252298217796962	33.24243057934918	48.0	2.079200257455077	33.05370851441578	glucose8a
2.3382898012092	2.306485674646675	1.5211988717245546	0.814731144575347	0.7064677271492076	36.35793973024988	63.0	3.12357660413132	28.04976053058468	glucose8a
2.4548372922598696	2.1655403807174864	1.610253154420605	0.814731144575347	0.7955220098452579	36.169006132427846	57.0	3.010124518556751	28.04976053058468	glucose8a
1.832838505664127	2.2834794807499446	1.5413975079948998	0.8199804831775216	0.7214170248173782	38.5513346778137	54.0	2.574920478419172	28.753916425537685	glucose8a
1.6274702623936388	2.8220665479822555	1.5413975079948998	0.8199804831775216	0.7214170248173782	39.28260374078326	66.0	2.9081393023809947	28.753916425537685	glucose8a
2.237963999286166	2.8341915216584144	1.8195657909654208	0.8199804831775216	0.9995853077878992	48.288218535679476	63.0	3.2525897299791593	33.22728996139512	glucose8a
1.7945293838970422	2.2605281408724416	1.9170202977827624	0.8199804831775216	1.0970398146052407	43.363038868586436	54.0	2.138037226986721	33.22728996139512	glucose8a
2.051156765592059	2.4084742161560255	1.7506606808410086	0.7706987539974499	0.9799619268435587	34.806307122367286	48.0	2.708970300907076	28.1975154717558	glucose8a
1.9838992305379095	1.8440629724485775	1.673639733482203	0.9585101488913812	0.7151295845908219	41.12892196365099	51.0	2.154322469504284	27.6081443676468	glucose8a
1.9826132880366647	2.6566373748689918	1.9325946026032768	0.9585101488913812	0.9740844537118956	39.13611930085371	51.0	2.7066560603023797	27.6081443676468	glucose8a
2.5696586191466957	2.332545175706127	1.8760656241765097	0.9097828954827104	0.9662827286937992	45.07145021783038	63.0	3.026138170676313	34.430215373633324	glucose8a
2.401568655484993	2.279026133829975	1.8760656241765097	0.9097828954827104	0.9662827286937992	37.394251387279155	57.0	2.8045291651384585	34.430215373633324	glucose8a
2.263079726053065	2.4713443101528165	1.5856872233726294	0.9380328120882548	0.6476544112843746	47.89175265504782	72.0	3.1487368128332522	36.94721008438451	glucose8a
2.024196137687086	2.1447414953174344	1.6763628586202044	0.9380328120882548	0.7383300465319496	43.17247872570711	63.0	2.492574774384316	36.94721008438451	glucose8a
2.6654895069779343	2.3542836474173834	1.6181906827292913	0.9380328120882548	0.6801578706410365	42.705951263494086	66.0	3.4015824716660266	39.53320952533378	glucose8a
2.10700626595481	1.4521993349505058	1.6181906827292913	0.9380328120882548	0.6801578706410365	39.66361712746438	57.0	1.9410149181760243	39.53320952533378	glucose8a
1.5584434423556948	1.8226246247921196	1.5584434423556948	0.8090953413646457	0.7493481009910491	48.327628599436125	54.0	1.8226246247921196	32.415481014689384	glucose8a
1.5173305546163958	2.4798269213865534	1.6887072021324967	0.8090953413646457	0.8796118607678511	49.37603727676064	72.0	2.308450273870452	32.415481014689384	glucose8a
2.5285965060330997	1.85436992333655	2.0657001998866247	0.8090953413646457	1.2566048585219793	56.705716367423946	57.0	2.317266229483025	41.0075308765836	glucose8a
2.2623517934434325	2.0518225098177414	1.9675264999147777	0.8090953413646457	1.1584311585501321	45.10012961501788	57.0	2.3466478033463964	41.0075308765836	glucose8a
2.13527383287438	2.9463245550631614	1.7129596723563456	0.9837632499573888	0.7291964223989569	38.373560206347086	63.0	3.368638715581196	34.80541220682204	glucose8a
1.8481182898058812	2.732670438303118	1.7129596723563456	0.9837632499573888	0.7291964223989569	32.07235706412642	57.0	2.8678290557526536	34.80541220682204	glucose8a
2.294893945857831	1.5617290252960419	1.8243518931044522	1.0328500999433123	0.7915017931611398	68.09891329054736	66.0	2.0322710780494204	38.90148470820153	glucose8a
1.9495843099697905	2.0182744471186473	2.0365090005182047	1.0328500999433123	1.0036589005748924	55.59922610348099	63.0	1.9313497565702331	38.90148470820153	glucose8a
2.4741214785049017	1.925361926041865	1.5601371919786793	0.8564798361781728	0.7036573558005064	36.12639359663841	57.0	2.8393462125680875	32.85036665960585	glucose8a
2.118739912083987	2.0927695924457486	1.7065986918715912	0.9121759465522261	0.794422745319365	45.40267987333737	57.0	2.5049108126581445	35.30606070550509	glucose8a
1.9452241167048447	2.3247090950404123	1.6054933778741827	0.9121759465522261	0.6933174313219566	42.317700953719964	66.0	2.664439833871074	35.30606070550509	glucose8a
2.0218554305778764	2.60290779827447	1.5269550280022621	1.0182545002591024	0.5087005277431597	42.72431463809596	72.0	3.0978082008500847	29.993604768766005	glucose8a
1.874602217750507	2.787781045932279	1.4709008353879323	1.0182545002591024	0.45264633512882985	36.51625469069964	72.0	3.1914824282948535	29.993604768766005	glucose8a
1.917760383608912	2.777501953127996	1.9214382760683912	0.8532993459357956	1.0681389301325959	46.44741904504882	66.0	2.7738240606685167	32.59599864744595	glucose8a
1.9118870500127065	2.3390351871620996	2.011486460559611	0.8532993459357956	1.1581871146238152	41.63852548964978	51.0	2.239435776615195	32.59599864744595	glucose8a
2.184016624666192	2.4663707709369516	1.5898157589822979	0.8027466889370913	0.7870690700452065	38.51913849401872	60.0	3.0605716366208453	29.926524872382227	glucose8a
1.923766673557315	2.718541024736067	1.5898157589822979	0.8027466889370913	0.7870690700452065	37.7682632844268	66.0	3.052491939311084	29.926524872382227	glucose8a
2.137449562469792	1.4936444864306657	1.8736058118812442	0.7949078794911489	1.0786979323900951	47.08874360603959	48.0	1.7574882370192133	33.60025576409526	glucose8a
2.015453056290504	2.349823906819759	1.740595805169852	1.0057432302798055	0.7348525748900466	37.669208377489646	54.0	2.6246811579404112	29.413646923272406	glucose8a
2.1062280042552524	2.306574574293919	1.8297288701506556	1.0057432302798055	0.82398563987085	42.17299308544812	54.0	2.5830737083985156	29.413646923272406	glucose8a
2.586696409981128	2.854495365249795	1.6409058335561537	0.9607191380341956	0.680186695521958	44.74223148349371	72.0	3.800285941674769	29.50400590167557	glucose8a
2.238687861743757	2.264963970251965	1.7946105269057726	0.9607191380341956	0.8338913888715769	35.69863528263914	54.0	2.709041305089949	29.50400590167557	glucose8a
2.0845224820302932	1.9673155287547073	1.4977922379634054	0.8973052634528863	0.600486974510519	40.673317974146165	60.0	2.554045772821595	34.44135171913472	glucose8a
2.3224722871771752	1.7829768399154928	1.4130384197848216	0.8973052634528863	0.5157331563319354	40.151911643059826	57.0	2.6924107073078467	34.44135171913472	glucose8a
2.8513032750980325	1.9954443792813659	1.790628387218104	0.8204529167780769	0.970175470440027	50.95405105419037	66.0	3.0561192671612947	39.79532938432504	glucose8a
2.408207163093588	2.193732607129778	1.7093113617793396	0.8204529167780769	0.8888584450012628	44.95427836981926	72.0	2.8926284084440264	39.79532938432504	glucose8a
1.8709961742847239	2.175761720991424	1.345842021559899	0.7488961189817027	0.5969459025781964	37.73720762746711	66.0	2.700915873716249	32.06957664661989	glucose8a
2.6415076117658214	2.5562426938591245	1.748362539066844	0.895314193609052	0.8530483454577921	43.0096179750705	66.0	3.449387766558102	43.86620423227742	glucose8a
2.065024689686074	2.069318014615988	1.8970497602573644	0.895314193609052	1.0017355666483123	47.92815804243432	66.0	2.2372929440446976	43.86620423227742	glucose8a
2.2548871381257185	2.622469102190633	1.5174319926109878	0.8546556808896698	0.6627763117213181	35.039042146905906	66.0	3.3599242477053637	37.049340970670585	glucose8a
2.186309023376261	1.921073318185004	1.5892722994519055	0.8546556808896698	0.7346166185622356	36.27482136846465	57.0	2.5181100421093596	37.049340970670585	glucose8a
2.6952533939402237	1.9088108331355578	2.1418834363139934	0.874181269533422	1.2677021667805715	58.25340409505434	57.0	2.462180790761788	40.638578642551096	glucose8a
2.485603542311745	1.527333685877772	1.8526937817922327	0.874181269533422	0.9785125122588106	52.09370485423335	57.0	2.1602434463972844	40.638578642551096	glucose8a
2.14027335740613	2.652771983049057	1.7080931777134296	0.7587159963054939	0.9493771814079357	36.10891945504707	60.0	3.0849521627417573	34.690571355780286	glucose8a
1.9699428489138726	1.7719572038170797	1.460951724049023	0.9485248801286822	0.512426843920341	61.580529180741905	81.0	2.280948328681929	31.769610610554988	glucose8a
1.9237201620896645	1.807585764163617	1.5257326562555158	0.9485248801286822	0.5772077761268336	59.63704889278327	78.0	2.2055732699977657	31.769610610554988	glucose8a
1.923234507684556	1.988200005744447	1.7800194341075903	0.9263468908961163	0.853672543211474	61.51363832393829	72.0	2.131415079321413	38.24005449710377	glucose8a
1.794457697478286	2.7679458357031077	1.5791272106342906	0.9263468908961163	0.6527803197381743	42.33995421750709	75.0	2.9832763225471033	38.24005449710377	glucose8a
2.3500583064086085	1.6561335905613106	1.8582094699785343	1.0709417181569967	0.7872677518215376	58.47687417220236	63.0	2.1479824269913848	41.465436829849594	glucose8a
1.775989225584667	2.6704457778018633	1.7301712831569445	1.0709417181569967	0.6592295649999478	40.7846893374288	78.0	2.716263720229586	41.465436829849594	glucose8a
2.197784920974785	2.6080633266195727	1.6182309690422065	0.9291047349892672	0.6891262340529393	47.84091788309886	72.0	3.187617278552151	36.154743175517055	glucose8a
1.7855428387373542	2.5662226179646797	1.6182309690422065	0.9291047349892672	0.6891262340529393	39.681364693715	69.0	2.7335344876598273	36.154743175517055	glucose8a
2.1785607971710226	2.3768128840791087	1.4050641140422206	0.8650856415784722	0.5399784724637484	39.466487168289596	69.0	3.150309567207911	27.32291116284103	glucose8a
2.2200024573507937	2.127113589493961	1.637286743246563	0.8650856415784722	0.7722011016680906	40.22703164808697	57.0	2.7098293035981915	27.32291116284103	glucose8a
2.204493127643852	1.9026257643803959	1.5888548923933286	0.8091154845211033	0.7797394078722254	43.44533873291946	57.0	2.5182639996309195	27.469889826728526	glucose8a
2.130943203895477	1.9329429843476826	1.6743366245864997	0.8091154845211033	0.8652211400653964	35.431757419320846	48.0	2.38954956365666	27.469889826728526	glucose8a
2.2509554730996486	1.5784680170204068	1.5751316229474428	0.7025320570211103	0.8725995659263326	39.134363745885445	51.0	2.2542918671726127	33.51631995647727	glucose8a
2.4258454718580142	2.1468858870711025	1.5558606203121255	0.8091154845211033	0.7467451357910222	42.64306003652045	69.0	3.0168707386169915	33.81207570730438	glucose8a
1.9918405023721468	1.8739672277406334	1.7725622637799916	0.8091154845211033	0.9634467792588884	40.766504020837225	60.0	2.093245466332789	33.81207570730438	glucose8a
2.3458221051415884	2.6482771106285896	1.7063902423997477	0.7779303101560627	0.928459932243685	55.03926321673886	78.0	3.2877089733704303	37.32069956704637	glucose8a
1.9897811427050875	1.8409722367766048	1.881196390561367	0.7779303101560627	1.103266080405304	50.79266220341776	60.0	1.9495569889203255	37.32069956704637	glucose8a
1.7322171871623715	2.804450899096315	1.4232912574304781	0.8862811318899958	0.5370101255404823	38.87651803188426	72.0	3.113376828828208	30.643700036494565	glucose8a
1.7185465633875472	2.362924101301095	1.5761562651832886	0.8862811318899958	0.6898751332932929	40.86865454868225	63.0	2.5053143995053535	30.643700036494565	glucose8a
[truncated: 1,124 more rows]
