# Supplementary material for: Initiation of chromosome replication controls both division and replication cycles in E. coli through a double-adder mechanism
Source: eLife journal article supplement (doi:10.7554/elife.48063), 2019-11-11
Supplement: supp [file elife-48063-supp-v1.zip › elife_poa_e48063_Figure_5_source_data_1.csv]

Lb_fit	DeltaL	Li_fit	datatype	condition
2.4055320541613265	2.663989771194703		Experiments	Glycerol
2.361075798696234	1.167983741810383		Experiments	Glycerol
1.6247920194684669	2.162499424994227	2.1543094860404968	Experiments	Glycerol
1.7208607939296516	1.7050794297922842	1.8902668123837736	Experiments	Glycerol
1.710056002547893	1.5553046423589472	1.9567507291899493	Experiments	Glycerol
2.4923348009481847	0.9854384018974138	2.147787236916526	Experiments	Glycerol
2.5309306139129175	1.1091992898654186	2.2079143120199713	Experiments	Glycerol
1.817531894091213	1.6424665471065898	2.10390487664971	Experiments	Glycerol
1.8130380371913937	2.031269180258844	2.4357901829737507	Experiments	Glycerol
1.452937527180739	2.1292833589882627	1.8082326876757588	Experiments	Glycerol
1.7652978316143644	1.9501816671182386	2.1835339756584284	Experiments	Glycerol
1.707328106585334	1.6673217967694016	2.1055557955393462	Experiments	Glycerol
1.9028285311329345	1.8385976835863014	2.451961961461633	Experiments	Glycerol
2.0483291591516255	1.8246350599296832		Experiments	Glycerol
1.8889809116265734	1.6696687091490685	2.16781747569168	Experiments	Glycerol
1.5776014906486684	1.413315412402135	1.7550863200932927	Experiments	Glycerol
1.8882816948095984	1.6296625323046445	1.8187470089078748	Experiments	Glycerol
1.7696102223449346	2.122325003671717	2.0271822190875772	Experiments	Glycerol
1.8090086966162973	3.0139751737300706	2.722003227790989	Experiments	Glycerol
1.7488038274022513	2.1088066247265806	2.413887477804877	Experiments	Glycerol
1.6541677976155484	2.1656016194409093		Experiments	Glycerol
2.2932586933469703	1.24880629441938	2.2932586933469703	Experiments	Glycerol
1.8851702635862175	1.643308554113028	2.3073741382194	Experiments	Glycerol
2.5819545148987744	1.9120636919210008	2.794681601800139	Experiments	Glycerol
2.251339837372969	1.6263934946810483	2.324510226434392	Experiments	Glycerol
1.8318771906716775	1.8995145169226126	2.2972402616189234	Experiments	Glycerol
1.7481097828969958	1.6609425911653115	2.1359357969472486	Experiments	Glycerol
1.6262598560387294	1.4589966189032286	1.908601559459458	Experiments	Glycerol
1.7341774789960749	1.575113498991686	1.9636453093755657	Experiments	Glycerol
2.140079756775951	1.6112931179118921	2.131485255740263	Experiments	Glycerol
1.6311435920142145	2.658075452243791	2.5875714196736994	Experiments	Glycerol
1.606491315480743	1.8282835772623756	2.21761843649356	Experiments	Glycerol
1.9322505909886212	1.73805186444298	2.1834207374966357	Experiments	Glycerol
1.8584806450184148	1.4156350446965154	2.15713853379235	Experiments	Glycerol
1.5204703129242312	1.5672432346533645	2.018559560021008	Experiments	Glycerol
1.6470113430635516	1.9353940395271254	2.2978944602859883	Experiments	Glycerol
1.6906789700780158	1.809241397061676	2.336169056659976	Experiments	Glycerol
2.393525843997466	1.606077369319415		Experiments	Glycerol
1.5105648226648425	1.8723930985049124	2.1422698028327085	Experiments	Glycerol
1.8957974905985235	2.1266612255250266	2.5613669690412095	Experiments	Glycerol
1.9960759172513647	1.6537279666199323	2.3364097217433692	Experiments	Glycerol
2.1029427731226695	1.2010771072228343	2.164465933433311	Experiments	Glycerol
2.4195852208753164	1.2387001162733156	2.164465933433311	Experiments	Glycerol
1.671645668888993	1.7801295818081768	2.2956846285599974	Experiments	Glycerol
1.814782850383901	2.275226602311661	2.686519594493634	Experiments	Glycerol
1.6615996311990644	2.0793233397066726	2.360142505825214	Experiments	Glycerol
1.4613147948835887	2.435361408122752	2.2332565093853796	Experiments	Glycerol
1.935052054632924	1.769468094996472		Experiments	Glycerol
1.6545108640418578	1.9601018559239067		Experiments	Glycerol
1.9151952803770014	1.6289857199697133	2.1893861869666367	Experiments	Glycerol
1.9684040696859035	1.8979374206989215	2.127861726251384	Experiments	Glycerol
1.8217278545038942	2.038228039834877	2.543409669882965	Experiments	Glycerol
1.5884899984027807	1.8263723970303907	2.238650653621128	Experiments	Glycerol
1.8142278250241586	2.604341272741745	2.32315339483727	Experiments	Glycerol
1.841093120174363	2.122420918812283	2.7328991333084036	Experiments	Glycerol
1.7755492590706512	2.2336115485971604	2.5649421864972743	Experiments	Glycerol
1.7572505736644628	1.9617558373237685	2.292803185990136	Experiments	Glycerol
1.8624242090576444	1.7681992703570222	2.214310617883348	Experiments	Glycerol
2.029209941385703	1.9552121082148268	2.468326650584712	Experiments	Glycerol
1.8473157075077975	1.6581758978546512	2.099822982212865	Experiments	Glycerol
2.1500827174625563	2.95198504195852	2.736450240821391	Experiments	Glycerol
2.1307566296443876	2.47634591354995	2.5414469887392754	Experiments	Glycerol
2.021125169926165	2.4214255926862647	2.741545619912666	Experiments	Glycerol
1.4489205175794093	2.0219987301745594		Experiments	Glycerol
2.296419405583449	1.4896097967750075	2.296419405583449	Experiments	Glycerol
2.1731076188291714	1.932147244696123	2.1731076188291714	Experiments	Glycerol
2.1969986501309253	1.3313164798728114	2.4505345419414883	Experiments	Glycerol
1.4600844042872612	2.6128923329116254		Experiments	Glycerol
2.5983797207817725	2.018825229420134	2.9747470189348806	Experiments	Glycerol
1.9610703743052922	1.5841077813044702	2.248196701917122	Experiments	Glycerol
1.5086263783228133	2.283818826695579	2.131612722508514	Experiments	Glycerol
1.882357311165117	2.1729931530823996	2.5694156192551603	Experiments	Glycerol
2.5284879606131065	1.6522011950027888	2.8829121510726967	Experiments	Glycerol
1.9382266301673865	1.5186344651408898	2.1491934862873916	Experiments	Glycerol
2.136222767004115	1.8998265732148156	2.768326120341634	Experiments	Glycerol
1.8990025675240665	2.0900180047253194	2.680302091637161	Experiments	Glycerol
1.643015331766927	1.3773847168709583	1.7160461477423106	Experiments	Glycerol
1.7248434350870467	1.335275345162823	1.9107854728359144	Experiments	Glycerol
1.9263541934382487	1.2293265672983595	1.7900625957499616	Experiments	Glycerol
2.0842895789739067	1.2164399858619546		Experiments	Glycerol
1.8206695139504891	1.6691821701095477		Experiments	Glycerol
1.9332308019364466	1.6913184986414618		Experiments	Glycerol
1.8909708038999231	1.641562593853832		Experiments	Glycerol
1.5751199670369802	1.5830031327268177		Experiments	Glycerol
1.930274465033362	2.940509719634803	2.5480797242452167	Experiments	Glycerol
1.7784107204725257	1.9702721976748756	2.5546358759907597	Experiments	Glycerol
1.7621337357084472	2.3786405377483675	2.671795742718708	Experiments	Glycerol
1.753327142493861	2.1863155364957354	2.0275405533434485	Experiments	Glycerol
2.0126864207535013	1.372252684840774	2.060813092751013	Experiments	Glycerol
2.2218926911150083	1.402550623508724	2.400372212555509	Experiments	Glycerol
1.7009508350412692	2.710296307966297	2.275893446633028	Experiments	Glycerol
2.1397922473017985	2.2759231727146148	2.8443042034843495	Experiments	Glycerol
1.6816300378455855	2.4379907148321323	2.31581736757662	Experiments	Glycerol
1.881692077224659	2.2686691299828166	2.3745917253625377	Experiments	Glycerol
1.7019510843840944	1.6975947823835351	2.338851337356506	Experiments	Glycerol
1.5272542117345536	2.147408618356804	1.908361546338767	Experiments	Glycerol
1.926631668007987	2.182707209537125		Experiments	Glycerol
1.6380074030638931	2.02067471368692	2.1993065109951817	Experiments	Glycerol
1.7686978864130063	1.6164468068763032	2.249416091185284	Experiments	Glycerol
2.069250681495028	1.901459024467135	2.4927916013117217	Experiments	Glycerol
1.8668575563453527	1.4068640718379843	2.209481408981375	Experiments	Glycerol
1.4759904343757453	1.8534768868891194	1.4759904343757453	Experiments	Glycerol
1.6692645382109406	1.8516525467308174	2.0881628088187516	Experiments	Glycerol
1.5487033814653086	1.9833935830309295	2.2213725907818187	Experiments	Glycerol
1.8241890725654417	1.829607100691172	2.3740950136175654	Experiments	Glycerol
2.1611771062396934	1.213553478434843	1.7665018247222932	Experiments	Glycerol
1.701140941683626	2.1056063217341157	1.701140941683626	Experiments	Glycerol
1.8216153124881436	1.3974439794086717	2.0029435964421856	Experiments	Glycerol
1.3769041708923953	2.724775646263792		Experiments	Glycerol
1.7340939662611887	1.9237266067861485	2.2862730546199423	Experiments	Glycerol
1.8489461280639194	2.1343546387019128	2.0845164495180466	Experiments	Glycerol
1.6868226170758098	1.7302456807323	2.190882747110939	Experiments	Glycerol
1.7173743319744659	2.2714938411806074	2.5294151032848773	Experiments	Glycerol
1.7379752285440675	2.0353265477450284	2.2671279172608614	Experiments	Glycerol
1.9670580985451491	1.5781503989250707	2.0952071394318987	Experiments	Glycerol
1.8510075922379599	1.7563017436576212	1.8983691890526646	Experiments	Glycerol
1.8195271464993306	2.088910991662102	2.6074432819062343	Experiments	Glycerol
1.8811297678968708	1.5346559056846159	2.195763358790191	Experiments	Glycerol
2.0957374709039582	2.3795067776380217	2.6803728666835287	Experiments	Glycerol
1.9319723833806677	2.4679436302690467	2.3330016353925	Experiments	Glycerol
1.9269710424826836	2.0827548998288763	2.60564342405597	Experiments	Glycerol
1.7888649701907229	2.2697468477143676	2.456442342856667	Experiments	Glycerol
2.0529268647443324	1.3664919512702798	2.2141139575820943	Experiments	Glycerol
2.0266429174155083	1.2513080682769036	2.073605627861266	Experiments	Glycerol
2.081657051410471	1.1576329494303992	2.1484555414626767	Experiments	Glycerol
2.378322483330887	1.923807443291916	2.6776468467275527	Experiments	Glycerol
2.6999016106508953	1.7365242930615588	2.4356217551670065	Experiments	Glycerol
1.9244307249672261	1.756180126600168	2.3013883031738227	Experiments	Glycerol
1.5398354308070241	1.9067444189981952	1.88344445718535	Experiments	Glycerol
2.0753941712562063	1.0523176470583602	2.170829002947891	Experiments	Glycerol
2.36146878088655	1.2026353112557313	1.9912011263397416	Experiments	Glycerol
1.4942506513405636	2.069867078349219		Experiments	Glycerol
1.4856313906028897	1.6370594644548055	1.8862953134178595	Experiments	Glycerol
1.58613420166011	2.3352763375723855	2.104672004081876	Experiments	Glycerol
1.7589188277059558	2.3748763037777367	2.4484916687085847	Experiments	Glycerol
1.882520886640449	2.322798104135716	2.443138983295778	Experiments	Glycerol
1.6509384227972441	1.6034296294061632	1.956207066059272	Experiments	Glycerol
2.0630591173693316	2.3309285457157487		Experiments	Glycerol
1.8286652954094123	1.5135602120484586	2.138132518311149	Experiments	Glycerol
1.8919973037276498	1.7872633060237233	2.2194334246364984	Experiments	Glycerol
1.5190540651205522	1.8632873655038176	2.3697847792768627	Experiments	Glycerol
1.6652248019470215	1.647839272238997	2.2435420921370666	Experiments	Glycerol
2.305700407156146	1.343242561042953	2.436276522934014	Experiments	Glycerol
1.9501241773087652	1.4801368325968096	2.1513795292143527	Experiments	Glycerol
1.6461208809661378	2.016982843184831	2.3263943919453327	Experiments	Glycerol
1.5090101293665779	2.5336251109689725	2.145553961227057	Experiments	Glycerol
2.0627976172480555	3.545869383997615	3.2175450512163586	Experiments	Glycerol
1.4878336836476633	3.0184140889015882	2.3276070372484807	Experiments	Glycerol
1.7044257793346904	1.6828655962730423	2.127137983417536	Experiments	Glycerol
1.863045379351741	1.77020106575967	2.2352897247280303	Experiments	Glycerol
2.2835653384689074	1.7345800541012846	2.113586529783795	Experiments	Glycerol
2.0562092112756956	1.703700157052761	2.113586529783795	Experiments	Glycerol
1.8753021992847003	1.8447386566490764	2.377080443683417	Experiments	Glycerol
2.245683086998313	1.394911341028915		Experiments	Glycerol
2.0745663927486646	2.608905602638896	2.9863105624960884	Experiments	Glycerol
1.8178415105152088	1.9634613690966876	2.4258414101579815	Experiments	Glycerol
1.7816011293261984	1.7054810598842747	2.3757682106659317	Experiments	Glycerol
1.7379960893930881	2.3582886994152394		Experiments	Glycerol
2.1392989745493147	1.9223775663631257	2.7062249596849406	Experiments	Glycerol
1.5339292396693562	2.3224515978786613		Experiments	Glycerol
2.626507179306368	2.1102192971778457	3.197018606330782	Experiments	Glycerol
1.7761864654967185	1.7949188567939576	2.6748126914269568	Experiments	Glycerol
1.8943509245690717	1.8707019491597365		Experiments	Glycerol
2.0959671909248265	1.96715243823741		Experiments	Glycerol
1.7234301157581318	1.6704740852294624		Experiments	Glycerol
1.965000991734756	1.4436019680431214		Experiments	Glycerol
1.499637569887474	1.7969666729703664		Experiments	Glycerol
1.4806582723164117	1.8711508767254128	1.9786103907833392	Experiments	Glycerol
1.3674512023090073	1.5166678451579836	1.9621629410540105	Experiments	Glycerol
1.7957447607094272	1.726143061719487	2.2092970825080513	Experiments	Glycerol
1.7794518219868343	1.718514322324044	2.430867721730116	Experiments	Glycerol
1.6781449698532525	1.468597934014475	1.745556709703546	Experiments	Glycerol
1.7735846892587752	1.738781343411812	2.171586915360648	Experiments	Glycerol
1.5921536185750222	1.6788398812169574	1.955808434719436	Experiments	Glycerol
1.4885363381712913	1.6285279963132115	1.5396300420016866	Experiments	Glycerol
1.4752258193857266	1.472303117911461	1.6230074554875573	Experiments	Glycerol
2.035388006659527	1.4193380363305232	2.2625620149508485	Experiments	Glycerol
1.6127416312902927	1.3644552293433403	1.8538496705030065	Experiments	Glycerol
1.7637250040397634	2.3601207039349923	1.9715485072924783	Experiments	Glycerol
1.7707582371904358	1.9932369574841047	2.220272130626989	Experiments	Glycerol
1.4443086091280561	1.4516160720018256		Experiments	Glycerol
1.5394481760299819	1.8435057213925101	1.809275769181589	Experiments	Glycerol
1.776711892052325	1.851496478513138	1.888838752971264	Experiments	Glycerol
1.8586782574210996	1.6287842148324432	1.9180922247378234	Experiments	Glycerol
1.7184346024131283	1.7579798983350992		Experiments	Glycerol
1.4220624421297579	1.7743905377406437	1.9928794196278308	Experiments	Glycerol
1.6790658261114726	1.870802830316157	2.4692578116561923	Experiments	Glycerol
1.5778634500509265	1.4951160147183487	1.6548067762789582	Experiments	Glycerol
1.6067513176983272	1.6341073217293456	2.1384069429748047	Experiments	Glycerol
1.3725267318536345	1.8875897969223534	1.8495955903498047	Experiments	Glycerol
1.921639096754611	1.79735668118888	2.2105401240401674	Experiments	Glycerol
1.7501307783631872	1.414308193106256	2.006459508620476	Experiments	Glycerol
1.6318669683862093	1.700347034185276	2.215963094067686	Experiments	Glycerol
1.3840960314632176	2.763769868415282		Experiments	Glycerol
1.4413825155690718	2.429085480871211		Experiments	Glycerol
1.3663887885402428	1.6194103167004135	1.923532565682496	Experiments	Glycerol
1.369469792682206	2.1599513249662596	2.1470847779724056	Experiments	Glycerol
1.806476037369415	1.8952041390581336	2.534900510796809	Experiments	Glycerol
1.6011679139660777	2.0250878212906716	2.4096149757022536	Experiments	Glycerol
1.5713809490440978	2.1196528859063495	2.4083231200398147	Experiments	Glycerol
1.8100862951917642	1.7317732578204097	2.079774539246074	Experiments	Glycerol
1.7671820717518838	1.8455805087095183	2.6291392494613097	Experiments	Glycerol
1.8420486339400044	1.9632781555868568	1.8420486339400044	Experiments	Glycerol
1.8193289259075685	2.2154843644588182	2.333505305777016	Experiments	Glycerol
1.7924710062485345	1.444529471435804	2.0382359114451805	Experiments	Glycerol
1.8038611869801338	1.9754727184230199	2.349209448778026	Experiments	Glycerol
1.8526485977004312	1.8164079223127936	2.290294878884009	Experiments	Glycerol
1.5651772211444235	1.6507659872458698	1.9227339322263604	Experiments	Glycerol
1.5802297959930367	2.106413228107831		Experiments	Glycerol
1.6908145214966654	1.8394133513030217	2.240457928478429	Experiments	Glycerol
1.7433958060584345	1.654585530271026		Experiments	Glycerol
1.5004882138921818	2.821801338449939		Experiments	Glycerol
2.3168161386783463	1.990735613568094		Experiments	Glycerol
2.417505510533204	1.9103214270333537		Experiments	Glycerol
2.5188297359684384	1.1672903738267166		Experiments	Glycerol
2.2089839651391676	2.7251455549114247	2.469831260160933	Experiments	Glycerol
2.0635761567079833	1.8199237623132372	2.4017354758314027	Experiments	Glycerol
2.0577678049703354	3.0327604992435115	2.270667767598898	Experiments	Glycerol
1.9686973561958268	2.1451814911814906	2.1748634962542654	Experiments	Glycerol
2.5165152790327623	1.2771968403723863	2.2563204208774574	Experiments	Glycerol
2.3091373862554985	1.6901193390592906		Experiments	Glycerol
2.034037942115995	1.6241564162166595	2.0946160939520384	Experiments	Glycerol
2.1472855625800866	1.6309378541138928	2.0163730901257906	Experiments	Glycerol
2.6333307202245435	2.076795916070418	2.174309171043062	Experiments	Glycerol
2.5500965670410967	1.3035867638794048	2.2616437071658333	Experiments	Glycerol
1.6807519739755605	1.7868949287770213	2.027910416002838	Experiments	Glycerol
1.9098773453355988	1.5489979627935104		Experiments	Glycerol
1.7205240687333079	1.7755884276295386	2.1157877951820523	Experiments	Glycerol
1.9094242020810348	1.939411904774204	2.5570958317282573	Experiments	Glycerol
2.442150599288232	1.611431288764054	2.2281908198801346	Experiments	Glycerol
1.9484144691639762	1.307668591060632	2.108153225240458	Experiments	Glycerol
1.5519663364039153	2.2060741395537224	2.5300934803290294	Experiments	Glycerol
1.4862703365301924	2.0618371403865057	2.0954072917326108	Experiments	Glycerol
1.7993386753047416	2.065215973823497	2.5273331123954748	Experiments	Glycerol
1.6546245000561792	1.4943596171124307		Experiments	Glycerol
2.1011243253827927	1.6720186973773234	2.1011243253827927	Experiments	Glycerol
1.8637096503531085	1.4362879529214194	1.950873384042279	Experiments	Glycerol
1.6232801762505353	1.8234733360842266	2.318975456470927	Experiments	Glycerol
1.6503606199480254	2.029221252459546	2.1812162246623363	Experiments	Glycerol
1.8635304416003675	3.1095776376481252	2.6244771505615696	Experiments	Glycerol
1.6750967104493897	3.425976934479677	2.673997537810077	Experiments	Glycerol
1.970359421082084	1.9332135749671537	2.3644126895555293	Experiments	Glycerol
2.3516880231116	3.069489352621118	2.6496955733316634	Experiments	Glycerol
2.341091188488039	1.8880896875557927	2.5474722573067408	Experiments	Glycerol
2.5460537244206263	1.8788491510677154	2.385691567048926	Experiments	Glycerol
2.597440770729785	1.3500354048555518	2.439420839398035	Experiments	Glycerol
2.2678749383817576	1.9962384095029884	2.519536813059047	Experiments	Glycerol
1.8836497679413065	2.232304578804322		Experiments	Glycerol
2.0281410242484417	2.3693814513099736		Experiments	Glycerol
2.688362293532926	1.6268278672818997	2.5033376989412166	Experiments	Glycerol
2.0868636272040013	2.6087338647551976	2.454332668404073	Experiments	Glycerol
2.175177576577117	2.240668699610079	2.7283549552749986	Experiments	Glycerol
2.1952714399506434	2.0003820172609053	2.4455326072679653	Experiments	Glycerol
2.1408180907188474	2.0015622438987326	2.3792879160338796	Experiments	Glycerol
1.7577073944878374	1.679984330788364	1.9813813492349903	Experiments	Glycerol
1.8657059024169815	1.920197527559815	2.018322479617464	Experiments	Glycerol
1.367003511009523	2.267249176200681	2.2289091913561987	Experiments	Glycerol
1.5793016781499978	1.843302620576323	2.2726456690207573	Experiments	Glycerol
1.7511476450428565	1.4373903041233418	2.0197217041357853	Experiments	Glycerol
1.5476060449380753	1.2510703730512722	1.734361803308345	Experiments	Glycerol
1.7339329469108626	1.3593372286587282	1.856105652224979	Experiments	Glycerol
1.8294308580495373	2.778357492834216		Experiments	Glycerol
1.502160643055796	1.7700097017713277	2.2170533393163137	Experiments	Glycerol
1.513833250684207	1.6354093667653087	2.0793784623985303	Experiments	Glycerol
1.271102742722929	1.4491767008096712	1.680116405731548	Experiments	Glycerol
1.5145918715780837	1.433261183915854	1.9382532197443403	Experiments	Glycerol
1.4469402132934408	1.681458088547882	1.6369296659766983	Experiments	Glycerol
1.5771413676547474	1.8573013560292353		Experiments	Glycerol
1.464558092295618	1.6584172324333513	1.8183067877671875	Experiments	Glycerol
1.4971255510241848	1.8444080574336368	1.9565341206725178	Experiments	Glycerol
1.5812979388275776	2.0497100903974914	2.3661951261611276	Experiments	Glycerol
1.7028599005515375	2.5054309869279567	2.3584820680764365	Experiments	Glycerol
1.5542797478029449	2.1972391351496503	1.9373080155443578	Experiments	Glycerol
1.5566732368684528	1.80091774531012	2.096148772379797	Experiments	Glycerol
1.6591774756246243	1.9937169362270875	2.461869234744084	Experiments	Glycerol
1.7726704221912628	1.88127635337822	2.295190780496742	Experiments	Glycerol
2.0750108174749387	1.393668864882998	2.2242056361898253	Experiments	Glycerol
2.215457773562791	1.2646086028378858	2.3707299398557877	Experiments	Glycerol
1.7435061251123953	2.297554884292798	2.273575339444052	Experiments	Glycerol
1.7419820726254385	1.8874986094456883	2.336490418530784	Experiments	Glycerol
1.8512125816585763	3.143380953984867	2.7201681311112296	Experiments	Glycerol
1.606841557851622	2.368648622095876	2.554209370323311	Experiments	Glycerol
1.7975786663148245	1.5427713852127234	2.3161993544654784	Experiments	Glycerol
2.0819358323985773	1.3899168886438802	2.225543649596842	Experiments	Glycerol
1.944567468239309	2.1779709456468925		Experiments	Glycerol
2.083104543422758	1.8398484886082476	2.6162292774012057	Experiments	Glycerol
1.7693294933716492	2.232716746089684	2.2704922773997818	Experiments	Glycerol
2.6711610483606436	1.0478013376762743		Experiments	Glycerol
2.056059931552924	1.4496632929268927	2.287621348771354	Experiments	Glycerol
2.086522067299905	1.4443643811351348	1.6544988888227714	Experiments	Glycerol
1.8985629773006834	1.9515454771860463	2.8184519162931827	Experiments	Glycerol
1.8848035199414523	1.6195217242238185		Experiments	Glycerol
1.9707596701186665	2.1218543717342593	2.5379994098046406	Experiments	Glycerol
1.549791018916165	1.7125079918781454	2.1396779465978435	Experiments	Glycerol
1.7963475705879262	1.6880375485056303	2.1199436434339916	Experiments	Glycerol
1.6592520194963152	1.8983880161356446	2.037487498364829	Experiments	Glycerol
2.193410119998213	2.2088214602651512	2.9749988268100536	Experiments	Glycerol
1.7786592309060587	1.9209793544528637	2.4812381786119024	Experiments	Glycerol
1.5608822342469295	1.8444722533358406	2.3055058709491507	Experiments	Glycerol
1.7605179993847913	1.8825791774887957	1.9397741810626685	Experiments	Glycerol
1.6725085924424579	1.794511602478945	1.9666236138360271	Experiments	Glycerol
2.003854731180046	1.6579610647688119	2.0595275684900303	Experiments	Glycerol
1.9400355206547912	1.749061569614324	2.0836364622343013	Experiments	Glycerol
2.2995280600889276	1.736834329172122	2.0781206877221075	Experiments	Glycerol
2.1819116954345703	1.1918303618381398	2.243021444491471	Experiments	Glycerol
1.6514921782624972	1.7997144879357536	2.357245819123461	Experiments	Glycerol
1.4610906257160008	1.9866630739314166		Experiments	Glycerol
2.0032122002953328	1.7103543439544784	2.2781046794321895	Experiments	Glycerol
1.9363284873897928	1.4200473809174483	2.0684547351057723	Experiments	Glycerol
1.6805353507048921	2.0181323783898835	2.418631205956699	Experiments	Glycerol
1.7860087084610894	1.6764275929423549	2.3488125187126467	Experiments	Glycerol
1.8451213609579848	1.6155934834548902	2.25850064683474	Experiments	Glycerol
1.6210117915720073	2.727098666108529	2.527072207200224	Experiments	Glycerol
1.616218161629677	1.5257345633018888	1.9542746600682182	Experiments	Glycerol
1.7677195387277609	1.8705197964575093	2.0509398825184606	Experiments	Glycerol
1.6368898773682485	1.685929679543195	2.113764217354688	Experiments	Glycerol
1.7186516336964124	2.0086012044325017	2.0986953647537216	Experiments	Glycerol
2.146062088048874	1.7806857468698176		Experiments	Glycerol
1.8777046780851419	2.437064063638268	2.1655569751138795	Experiments	Glycerol
1.8220339026051309	1.987999513231344	2.003986626340092	Experiments	Glycerol
1.6223073106211172	1.7997109202524324	2.186718115093732	Experiments	Glycerol
1.4903626700529071	2.085434017354558	2.228043715042749	Experiments	Glycerol
1.8651569977209697	2.5504273791478003		Experiments	Glycerol
1.6755803209299371	1.858177440030828	2.356743042209648	Experiments	Glycerol
1.6131177109350445	2.1821287662290807	3.2117205925683234	Experiments	Glycerol
1.5889369438663825	2.95709149809233	2.192094954778326	Experiments	Glycerol
1.8037423372685037	2.038321112153495	2.3208006832196912	Experiments	Glycerol
1.8710043139658714	1.5576755677410434	2.289595901220176	Experiments	Glycerol
1.8327729744727306	2.061149042990187	2.431297697637835	Experiments	Glycerol
1.5583870286254708	1.8560185020647777	1.6792571577847535	Experiments	Glycerol
2.0405114186903366	1.609699285118067	1.8200546676672562	Experiments	Glycerol
1.6888623863858419	1.348290759394656	1.9664019683837621	Experiments	Glycerol
2.050671727343534	1.5728511099478597	2.1044280988309456	Experiments	Glycerol
1.9647507319414743	1.5746023168705763	2.5455327375589	Experiments	Glycerol
1.5257654746400862	1.7502812754517576		Experiments	Glycerol
1.9547163339009086	1.7217072509884033	2.56247006009849	Experiments	Glycerol
1.721302767920752	1.8809519397424435	2.3461272078918167	Experiments	Glycerol
1.6839444599038873	2.0086875741176358	2.4658142126632896	Experiments	Glycerol
1.6098042090969105	1.8507109012568579	2.077601685906524	Experiments	Glycerol
1.4500525035851701	1.6829900197125236	2.1033248048956197	Experiments	Glycerol
1.4746489908215326	1.6956804229057405	1.9200598773635926	Experiments	Glycerol
1.549747404384698	1.9152131819421758	1.8479930977259715	Experiments	Glycerol
1.6012143199081115	1.6854483638928335	2.017592386023057	Experiments	Glycerol
1.5431176750073559	1.816381266282797	2.0179380342339432	Experiments	Glycerol
1.5009020986008288	2.2306890493508322		Experiments	Glycerol
1.6733884807043564	1.4412795546424952	1.978059142735012	Experiments	Glycerol
1.4908339785089133	1.423410911752312	1.7628017491360786	Experiments	Glycerol
1.9118284022472927	2.2358968561302093	2.1114078097518005	Experiments	Glycerol
1.6406007618085239	1.4964252688372963	2.0027326339838223	Experiments	Glycerol
1.5708270281690409	2.158002896093725	2.5911395461489803	Experiments	Glycerol
1.4062021147410426	1.8190715416257401	2.033659943620215	Experiments	Glycerol
1.5036829276039476	1.8552753489255467	2.2217440932254613	Experiments	Glycerol
1.5480392119838444	1.789185355776933	2.11361853709096	Experiments	Glycerol
2.061265356340628	2.150775852472602	2.416031018760136	Experiments	Glycerol
1.8701693858795776	2.235210906834819	2.4720006858634664	Experiments	Glycerol
1.6815586399739169	1.6072854330150066	1.8955509286755847	Experiments	Glycerol
2.138915500847653	1.812073305759223	2.3348919894596265	Experiments	Glycerol
1.8813882737837797	1.9163695618735346	1.9309744966527018	Experiments	Glycerol
2.0629187257941046	1.9654311597686647	2.4074321528284894	Experiments	Glycerol
2.019839146653307	2.2230176017308056	2.538042036495596	Experiments	Glycerol
1.865356441222815	2.3873186449678316	2.5498647464127813	Experiments	Glycerol
1.8741744031827796	1.9084789146576933	2.4388211561705946	Experiments	Glycerol
1.8456828997886523	1.906975869768148	2.4083817838438413	Experiments	Glycerol
1.9323982382061677	1.7122513722429713	2.3020404472214127	Experiments	Glycerol
2.2798701520475357	2.0769956805643734	2.924749009926115	Experiments	Glycerol
1.7861527285851873	1.9363589428684929	2.303101629191311	Experiments	Glycerol
2.415917016880876	2.1450710550711123	3.0439482012907226	Experiments	Glycerol
1.8117651891563868	1.82581987363303	2.1730517169860377	Experiments	Glycerol
1.5674994197158663	1.9529581999732413	2.2690476124410597	Experiments	Glycerol
1.9048118360839843	2.076648565871316	2.6298764489510256	Experiments	Glycerol
1.9245345116350874	2.359136970555003	2.584333172184276	Experiments	Glycerol
1.5570582289910764	1.8696855508783221	1.7184106336508176	Experiments	Glycerol
2.382769497623855	2.3144957625795803		Experiments	Glycerol
1.631740943425283	1.6014549302115575	2.003297515489629	Experiments	Glycerol
1.700760475280536	1.7997579842012446	2.3253508150019795	Experiments	Glycerol
1.657088153656114	1.8016015345504135	2.1836491329373118	Experiments	Glycerol
2.1988091746303127	2.197570750187613	2.6293060100909385	Experiments	Glycerol
1.923668422814187	1.7428695620592318	2.2201403611845945	Experiments	Glycerol
1.4886101428190468	1.908370751431446	2.165958463891486	Experiments	Glycerol
1.645075255087656	1.923530937598933		Experiments	Glycerol
1.9586988892759678	2.7308824097666466	2.8288940634563575	Experiments	Glycerol
1.5971634329211077	2.876079428355964	2.2513364258747597	Experiments	Glycerol
2.0683346580151376	1.8709149280332102	2.1117688520027853	Experiments	Glycerol
2.0410909305807814	2.3613478533107046	2.997628708535798	Experiments	Glycerol
2.0804862531960095	1.599973083491117		Experiments	Glycerol
2.4682750010826124	1.9256762197318986		Experiments	Glycerol
1.7394847115861634	1.935931109818978	2.2321115987650444	Experiments	Glycerol
1.9502884850127453	2.0651379781156614	2.459854423724159	Experiments	Glycerol
1.7672379937608556	1.524501777059439	1.9236719436973064	Experiments	Glycerol
1.8957143892800357	1.7103013136319913	2.4054734944524956	Experiments	Glycerol
1.6514523477490073	1.4604911749406502	1.9348952644396011	Experiments	Glycerol
1.7472097669167346	1.7154581019395005	2.2581080518638714	Experiments	Glycerol
1.4460282293780957	2.020771800681391	2.2671372381405037	Experiments	Glycerol
1.6201798065524646	1.7615649475072934	2.5524038196121643	Experiments	Glycerol
1.7667543553490361	1.6611051670936146	2.13509953691479	Experiments	Glycerol
1.6413580599606499	2.4110131693162957	1.9665478148749982	Experiments	Glycerol
1.6374025611471108	2.0739634556899995	2.2803371975786764	Experiments	Glycerol
1.7310705972477602	2.7621346411597543		Experiments	Glycerol
1.8028041573195865	2.3999645530773055		Experiments	Glycerol
1.5174870030876202	2.094639379929901	1.9955530719272299	Experiments	Glycerol
1.9991937250449194	1.5337331503190732	2.305020658750733	Experiments	Glycerol
2.2559496881710883	1.837582497865693	3.0388818105691424	Experiments	Glycerol
1.7091541873838876	1.5943465508538603	1.9786989551079253	Experiments	Glycerol
1.8927236030888306	1.512143096424516	1.8927236030888306	Experiments	Glycerol
1.6211495361510524	1.4090094214354485	1.7378230690919252	Experiments	Glycerol
1.55625728156425	1.8244660035910096	1.9029753353281533	Experiments	Glycerol
1.6087398540359925	2.2738007735777273		Experiments	Glycerol
1.5411644382721732	2.5006480532317	2.495816034500544	Experiments	Glycerol
1.6284841847726084	2.0914388180723984	2.3897156815810177	Experiments	Glycerol
1.864435192685592	2.1170001509798047	2.307900188226648	Experiments	Glycerol
2.0592532581672303	1.645132894864465	2.6300406808709176	Experiments	Glycerol
1.6926413195095409	1.954929026453326	2.148057616003098	Experiments	Glycerol
1.9733267036101196	3.065285831417026	2.3400188241099213	Experiments	Glycerol
2.059253640106856	1.5627130625143106	2.5318024863196062	Experiments	Glycerol
1.6205871423491929	2.2411196052954314	2.4127540449044034	Experiments	Glycerol
1.6630407315377636	2.455118876282759	2.352196420224068	Experiments	Glycerol
1.835572853468505	1.557300651867273	2.2728472514301807	Experiments	Glycerol
1.8574172912262081	1.5720051584474748	2.3020699191105782	Experiments	Glycerol
1.4518748711008882	1.7043627247853232	1.987286373118103	Experiments	Glycerol
1.9226351631972005	2.1511244172946293	2.5561681585249323	Experiments	Glycerol
1.7847895367770321	2.0758952920733607	2.224966074830899	Experiments	Glycerol
2.0425783719049146	1.405245299069374		Experiments	Glycerol
2.1863395239080576	1.989443823814418	2.7126330989073892	Experiments	Glycerol
1.8269662606058918	1.8624396176527405	2.2243021489599073	Experiments	Glycerol
1.5450934143952342	1.6842206921596317	2.014701634734976	Experiments	Glycerol
1.6442999460595658	1.7525105511007284	2.038642737703238	Experiments	Glycerol
1.5262037880483135	1.7502264104081169	2.047497817567479	Experiments	Glycerol
1.6715669441830596	1.71216928706502	2.2027723887963386	Experiments	Glycerol
1.5416549276529021	1.86121204277573	2.0501044199602343	Experiments	Glycerol
1.4389348836861846	1.7136274653018144	1.8515138227121164	Experiments	Glycerol
1.7099303262463958	2.2255397502088954	2.3284087866359484	Experiments	Glycerol
1.6268018770173902	1.5470392662243686	1.8698360272680055	Experiments	Glycerol
1.6761382666608737	2.095649840569472	2.3820236422227117	Experiments	Glycerol
1.624377049808176	1.6760445138460975	2.0742125073761715	Experiments	Glycerol
1.4851173221491931	1.6842965890477106	1.8213626727678345	Experiments	Glycerol
1.6318455784136143	1.7556804304786466	2.047017470365956	Experiments	Glycerol
1.7520487603233101	1.6628818155589278	2.1137931031540482	Experiments	Glycerol
1.5984418967335292	1.7228267654148788	1.7083239591993662	Experiments	Glycerol
1.6541703538311832	2.1066468379054464	2.11636626486985	Experiments	Glycerol
1.6028000839865362	1.7983923020589443		Experiments	Glycerol
1.676473713157029	2.630592748361253	2.499005725301944	Experiments	Glycerol
1.5329268595411307	1.6543718358676662	2.210406247632446	Experiments	Glycerol
1.486784233940455	1.7942164010695876	1.876520655839613	Experiments	Glycerol
1.6796465935302498	1.5558512508209774	2.258408943866011	Experiments	Glycerol
1.6214317037009813	2.045995296324911	2.181695975403946	Experiments	Glycerol
1.382847610276415	1.9831299316753224	2.3468652277026893	Experiments	Glycerol
2.2085147594772634	1.5814118346028763	2.3250727346199933	Experiments	Glycerol
2.1015518455374944	1.1755460297428844	2.1148087579480244	Experiments	Glycerol
1.5914399613979175	1.6234187776841815	2.2058193751117385	Experiments	Glycerol
1.54759136233409	1.6510971645059684	2.0584025187263326	Experiments	Glycerol
1.9355373023187254	1.5546450979109354	2.2429169359775183	Experiments	Glycerol
1.672286054971653	1.6669625238137693	2.2349038205113176	Experiments	Glycerol
1.6782758187575257	1.5475913313560399	2.086688955608214	Experiments	Glycerol
1.4633112624159663	1.845365889707542		Experiments	Glycerol
1.7047339966111628	2.4545916029780592	2.534074745580125	Experiments	Glycerol
1.456028633669969	1.6412859478876693	1.9614205993334561	Experiments	Glycerol
1.5798085477806603	1.7317119862883232	2.07233306665882	Experiments	Glycerol
1.550589543319149	1.635235047577497	2.169877360297905	Experiments	Glycerol
1.7225362464482266	1.714084037909498	2.4021221370086505	Experiments	Glycerol
1.535593126800597	1.8199665694297498	2.030122119253117	Experiments	Glycerol
1.5858368214090115	1.5156288842135028	1.9345150952219432	Experiments	Glycerol
2.294317251946636	2.036454314930921	2.9418393995145156	Experiments	Glycerol
1.7009253401867037	1.679751287103522	1.9626140959496823	Experiments	Glycerol
2.082629468936268	2.003607667849615	2.7270721749282605	Experiments	Glycerol
1.8792313584845035	1.4484332434996767	2.253927938470442	Experiments	Glycerol
1.6374724820437918	1.832625352627573	2.1412258502797172	Experiments	Glycerol
1.582224522648833	2.0452183308982645	2.2746446824915365	Experiments	Glycerol
1.8794408931678137	2.56686083112235	2.6033402438420397	Experiments	Glycerol
1.5917945216390943	1.6894912532897832	2.0707417176689784	Experiments	Glycerol
2.067995007868338	1.5916978887582833	2.3851916224525076	Experiments	Glycerol
2.283984141214964	2.0775736528460125	2.795693168183195	Experiments	Glycerol
1.8332211842613857	2.3804464682329476	2.1744905048766325	Experiments	Glycerol
1.635600904610416	2.190773751205449	2.2369964340298854	Experiments	Glycerol
2.150434861726797	1.6210925052055352		Experiments	Glycerol
2.036423844760978	1.7823583601874766	2.396959276976979	Experiments	Glycerol
2.2630681819699063	1.4989276946835446	2.7732301253639693	Experiments	Glycerol
1.7761447813356024	2.9436360045096364	2.297068850046813	Experiments	Glycerol
1.828559904732392	2.086877722918662	2.6039645566235987	Experiments	Glycerol
2.2213928912939713	1.714641460820733	2.52250957092805	Experiments	Glycerol
1.7583420839845683	2.7859529032016663	2.0030981672216877	Experiments	Glycerol
2.0061828494256884	1.8556005626422287		Experiments	Glycerol
1.8364981096728474	1.9653723462214128	2.1142342195210557	Experiments	Glycerol
2.3520233414606326	1.3302821486012602	2.14872018730497	Experiments	Glycerol
1.8837504157284735	2.284935953599836	2.267345632766253	Experiments	Glycerol
1.710463994122548	1.8630373407215866	1.9921255139324798	Experiments	Glycerol
1.6232786121324052	2.4426401881274	2.080499244351997	Experiments	Glycerol
2.006986947446216	1.597021486416645	2.571035978184079	Experiments	Glycerol
1.9700867011132555	2.522161205318037	2.5701722765379587	Experiments	Glycerol
1.540280477986843	1.914762862345301		Experiments	Glycerol
2.1018377636912393	1.6787409833905018	2.3277691244357883	Experiments	Glycerol
2.0639261051946542	1.481528910488791	2.3129335838375664	Experiments	Glycerol
1.6739729560397345	2.1360951436523017	2.4327917690202243	Experiments	Glycerol
1.7659427544428048	2.279152974201187	2.599886005995791	Experiments	Glycerol
1.6557281908403152	2.879138771784226	2.9743591520948383	Experiments	Glycerol
1.91816189652596	2.4367858932181043	2.5210675980777912	Experiments	Glycerol
2.0565660475541416	2.2375170894486742		Experiments	Glycerol
2.251734856110649	3.2548821356577164	2.0210657367922162	Experiments	Glycerol
1.9823624416983154	3.137786557391162		Experiments	Glycerol
2.1774906315651203	1.5743105594728863	2.4508812997936467	Experiments	Glycerol
2.177529455447056	1.7969154743253242	2.299956993360489	Experiments	Glycerol
1.8518891655353158	1.7776225431726236	2.1077237307953114	Experiments	Glycerol
2.0043103408535514	1.4682679840996702	2.2149433271963233	Experiments	Glycerol
1.9014299173031388	1.874837463028537	2.2315650594465937	Experiments	Glycerol
1.7133394198372216	1.9935795545863415		Experiments	Glycerol
2.019227618600231	1.3758482147820765	2.257053702218427	Experiments	Glycerol
1.6445524917717258	2.1744214398384285		Experiments	Glycerol
1.9395458073100873	1.6526697069972742	2.5858845686937166	Experiments	Glycerol
1.5964056900677093	2.0059740817833553	2.2012101922610796	Experiments	Glycerol
1.7870250627927327	1.5057100971052422	2.2268146007300427	Experiments	Glycerol
1.6842073409364293	2.060115327955546	2.04414342713576	Experiments	Glycerol
2.011126796735684	1.72295005274585	2.5980277367863165	Experiments	Glycerol
1.501509195244947	1.8981508519296015	2.2593407935810514	Experiments	Glycerol
1.6756700181452793	1.9543628440234269	2.367990446498544	Experiments	Glycerol
1.6965662353574622	1.8880718920097732	2.2761458516441087	Experiments	Glycerol
1.6278749442578706	1.486657398814607	2.2770107267783053	Experiments	Glycerol
1.9373952444041194	1.806888638795397		Experiments	Glycerol
1.7419904971385	2.423084649450056	2.5472205583014182	Experiments	Glycerol
1.767232271476493	1.8650548987551232	2.1455187699476066	Experiments	Glycerol
1.5510001240683673	1.877815003721314	2.2724677288698194	Experiments	Glycerol
1.814625282523443	1.7340421799947696	2.0644388541583694	Experiments	Glycerol
2.2411032924774097	2.526024289380089		Experiments	Glycerol
1.5202748220417712	1.8103700966084864	2.6234063694334133	Experiments	Glycerol
1.6285839081043023	1.6161138248036773	2.2526170432320813	Experiments	Glycerol
1.8189573755660535	2.7510772899243032		Experiments	Glycerol
2.0738679805868494	1.2839557715423533	2.2378182439337007	Experiments	Glycerol
2.004471588620724	1.2256326988847261	2.2584166386213447	Experiments	Glycerol
1.7453828877846127	1.7697439088242493	2.3195895345123567	Experiments	Glycerol
1.5107807129759367	2.0129522736085725	2.3072901494629954	Experiments	Glycerol
1.6946711557214662	1.5275124762549053		Experiments	Glycerol
1.67582962519838	1.8862690979588557	2.2234808666081727	Experiments	Glycerol
1.6132671737922897	2.0959625338874766	1.6094940391453147	Experiments	Glycerol
1.736217201269499	1.8800894397750245		Experiments	Glycerol
2.6203570947417703	1.4525962427023504	2.998398328139715	Experiments	Glycerol
1.953868793998408	1.4406263236292463	2.3823528823719244	Experiments	Glycerol
1.7104651762717107	2.058613969455063	1.5830980621416453	Experiments	Glycerol
1.5663111992993997	2.143299728080059	2.379193245164009	Experiments	Glycerol
1.6207876228736857	2.1643628866102897	2.2358761737887733	Experiments	Glycerol
2.0331430283310477	1.6404686542135671		Experiments	Glycerol
2.324590662935956	1.2365605633962087	2.776715975113796	Experiments	Glycerol
1.771682045421981	1.5811248272998135	2.2566457074159056	Experiments	Glycerol
1.4709540334240736	1.9193368214606488	1.516302784870623	Experiments	Glycerol
1.7480125354624447	2.1307123745749976		Experiments	Glycerol
1.7962113301526037	1.8298288429441192	2.2295987776833277	Experiments	Glycerol
2.017339243773863	1.4701070323510788		Experiments	Glycerol
1.5819030064193447	1.9018387776379408	2.076871100401014	Experiments	Glycerol
1.6307101532272235	1.201517674251284	1.8833048351659343	Experiments	Glycerol
1.5732145809832345	1.3029210250706695	1.9591535273851184	Experiments	Glycerol
1.3436390617304985	1.6653159710313181	1.4961220759226552	Experiments	Glycerol
1.334500093994145	1.84076354478494	2.058492075381122	Experiments	Glycerol
1.9616548596879695	1.7715578770937914		Experiments	Glycerol
1.2717260406054598	1.5405947548171477	1.6737972820779694	Experiments	Glycerol
1.4994502657219848	1.8118381068828429		Experiments	Glycerol
1.606675798019059	1.637543510687431	1.806308437669376	Experiments	Glycerol
2.248786432723574	1.7886692051636301	2.5686903062270305	Experiments	Glycerol
1.7527841483857054	1.609588251255239	1.8597227264235237	Experiments	Glycerol
2.0667719339378476	1.5515929592246152	2.19227302537302	Experiments	Glycerol
2.0322829399186593	1.094592849648214	2.1770102262102524	Experiments	Glycerol
2.6193714665612107	1.5185862427085053	2.2298642867161407	Experiments	Glycerol
1.5285360424357135	2.268643349694097	2.376187688690345	Experiments	Glycerol
1.4428031587877725	1.972633643414827	2.0034309885677475	Experiments	Glycerol
1.5117406399954516	1.552587967032064	1.9261307367494458	Experiments	Glycerol
1.8367405305842097	1.7369742762487204	2.2426909684632177	Experiments	Glycerol
2.054823389079849	1.9041582623176239	2.6351509380177993	Experiments	Glycerol
1.6079434444795926	3.6464749086366313		Experiments	Glycerol
1.6756145449806477	2.4759340228989197		Experiments	Glycerol
1.4912756178662563	1.9089031437482071	2.3573040497252777	Experiments	Glycerol
1.2850617807117177	1.7792484363866077	1.9661352152956348	Experiments	Glycerol
1.6819330032040658	1.3121815197511868	1.8792044073616707	Experiments	Glycerol
1.710685573327209	1.6528081021307734	1.9661717702643269	Experiments	Glycerol
1.4728268040117611	2.260194000183165	2.5733385017817025	Experiments	Glycerol
1.4133517127420885	2.309204990588145	2.0820285400489023	Experiments	Glycerol
1.5210218318133224	3.5383357523211645	2.28773047310901	Experiments	Glycerol
1.5082930981913916	2.7522513477106014		Experiments	Glycerol
1.4144102074373648	2.374726646734025		Experiments	Glycerol
1.8440766121915897	1.2806171047015966	2.00420136553374	Experiments	Glycerol
1.9401051205685955	1.7656083415819745	2.128015428675981	Experiments	Glycerol
1.9444477882886149	2.9071428339131584	2.9830957965543563	Experiments	Glycerol
1.635839687870487	1.9435815827053156	2.419784985079398	Experiments	Glycerol
2.6075173580077253	1.588316750765065		Experiments	Glycerol
1.5725205577609693	1.9041949204539295	2.170596206089839	Experiments	Glycerol
1.4186555415176634	2.3413114598618354	2.1623633245784024	Experiments	Glycerol
1.8103178379460212	1.877881702905938	2.3640255866964437	Experiments	Glycerol
1.7133843591974522	2.1885790342148104	2.198702307568647	Experiments	Glycerol
1.7572921470547473	2.048544390442548	2.117641076083125	Experiments	Glycerol
1.6762808569256842	1.6140732946605698		Experiments	Glycerol
2.0090634505381044	1.5228504777177	2.061250455701451	Experiments	Glycerol
1.841945773210444	1.6108920726142872	2.4659263806129395	Experiments	Glycerol
1.5690542868673656	1.8807456517456067	2.1609206542540886	Experiments	Glycerol
2.59069579745847	2.2530699810636996	3.1407758867544304	Experiments	Glycerol
2.156769550058721	1.3678473484857894	2.399800204120783	Experiments	Glycerol
1.6762404002473585	2.006636844579317	2.307880129574302	Experiments	Glycerol
1.6724586373760035	1.7446392482969364	2.2922044003835067	Experiments	Glycerol
2.5076220222810264	1.9136923316440946	3.029413210112847	Experiments	Glycerol
2.001071985520368	1.9814735063613416	2.4599830914194314	Experiments	Glycerol
2.0120754016648763	1.615253038310808	2.2889257338374125	Experiments	Glycerol
1.5241337036559055	2.321992133140946	2.258776425414899	Experiments	Glycerol
1.772036552532991	3.618045002528839		Experiments	Glycerol
2.0799227615579152	1.7948818052013467		Experiments	Glycerol
1.5405149758982053	2.98748053283656	2.222631914095414	Experiments	Glycerol
2.038596006761104	1.6424821610242426	2.259253094484264	Experiments	Glycerol
2.056707858471351	1.599218342527835	2.232861916357385	Experiments	Glycerol
1.710044929003175	1.619386914252573	2.2572271965460344	Experiments	Glycerol
1.8030026557156047	1.9037190364260472		Experiments	Glycerol
1.7248436537055285	1.9605303962052194	2.4582417652974557	Experiments	Glycerol
1.7769533302129514	1.4642786279635156	2.2341770176083746	Experiments	Glycerol
1.4850042378592383	2.622646547992817		Experiments	Glycerol
2.060083035433298	1.760217219573267	2.53098157146082	Experiments	Glycerol
1.5298724832877084	1.6525488343436756	2.071494716203924	Experiments	Glycerol
2.5227246126172234	1.2668243733847784	2.4843621392471777	Experiments	Glycerol
1.9400933366124977	2.9340422919620064		Experiments	Glycerol
1.8271440909940988	1.6938594922758214		Experiments	Glycerol
1.8742241573139842	1.5391819007426533	1.9663048262940614	Experiments	Glycerol
1.6094432896070678	1.4211726325207295	1.6507065986227947	Experiments	Glycerol
1.886524868251717	1.573510811253797	1.8600512386996246	Experiments	Glycerol
1.711236000693156	1.4752044681484147	1.8259643157367436	Experiments	Glycerol
1.5926287152837455	1.5577561785794933		Experiments	Glycerol
1.718564741046149	1.7729737679319846	2.023990276292958	Experiments	Glycerol
1.6156506626164	1.3922785984041282	2.174902093570223	Experiments	Glycerol
1.4955725145903809	1.6491518015889464	1.725359543727831	Experiments	Glycerol
1.4181982758157583	1.4793885740787391	1.6724168404321644	Experiments	Glycerol
1.652209372233464	2.093742954691503		Experiments	Glycerol
1.5945455950155296	2.0980957187014733		Experiments	Glycerol
1.385165837976845	1.4840867586960793	1.938523909513462	Experiments	Glycerol
1.4251884764145755	2.493622660352888	2.221916981374432	Experiments	Glycerol
1.7127081930534744	2.0792063079375938	2.2644416515643635	Experiments	Glycerol
1.6223361858031218	1.8486769415552187	2.3440716796341343	Experiments	Glycerol
1.3870159455929072	1.8498937730509442	1.8560870610809144	Experiments	Glycerol
1.3235456035100515	2.406087312591155	2.52013248533832	Experiments	Glycerol
1.3477955100322323	1.8100906261394003	1.678994047985037	Experiments	Glycerol
1.7776552634077283	1.7657941187980897	2.0977147344659017	Experiments	Glycerol
1.540682614256643	1.5670445748711603	1.9304653717670512	Experiments	Glycerol
2.094607732870949	1.8163152260766702	2.46868088736498	Experiments	Glycerol
1.7415840853060391	1.5108487171500937	2.081845109452951	Experiments	Glycerol
1.7868971053873153	2.0078866914013203	2.2236192758968456	Experiments	Glycerol
1.5953185316782608	1.999308156025632	2.2829546553518	Experiments	Glycerol
1.5325318088496789	2.295914534593601	2.079443795636531	Experiments	Glycerol
1.462400112876921	1.5342688530868347	1.9810040855142972	Experiments	Glycerol
1.5374376361837037	1.628705498344448	1.9899630903550518	Experiments	Glycerol
1.5121718700082214	1.8990502826279827	2.3203483003572845	Experiments	Glycerol
1.5685574772054072	2.515934220509605	2.60065387560872	Experiments	Glycerol
2.0735198663253276	3.831616622944918	2.6012848458654183	Experiments	Glycerol
2.197784093508266	2.9952466660557318	2.619367458093867	Experiments	Glycerol
1.6532920230186257	1.7426200866331185	2.051783966421595	Experiments	Glycerol
1.793796513487899	2.0501765039783084	2.291755765002234	Experiments	Glycerol
2.6586274474984695	1.971412617540424	2.6586274474984695	Experiments	Glycerol
2.356735996999961	2.3743519146069203	2.4207577065399	Experiments	Glycerol
2.5922992100451077	1.12934220560149	2.5236067688502684	Experiments	Glycerol
2.4933171753132313	2.0349195437582295	2.873957152611552	Experiments	Glycerol
1.9111002950269347	1.6226846296125856	2.1908224166620296	Experiments	Glycerol
1.8007006565045336	1.5101342952540888	1.9372293665473357	Experiments	Glycerol
2.666804497333685	1.1856095072226465	2.550656778834932	Experiments	Glycerol
1.6760589447020073	1.8811101263689254	2.0578831519963376	Experiments	Glycerol
2.0637317059581757	2.2179512796392564	2.4768149170831877	Experiments	Glycerol
1.6290725209247636	1.851604368919506	2.289535653428202	Experiments	Glycerol
1.4597397885821308	2.276132888474792	2.252355628381834	Experiments	Glycerol
1.6848102696304126	2.0116918322813797	2.1664455942705367	Experiments	Glycerol
1.5431031899531276	1.5631466162412166	1.9108887335192977	Experiments	Glycerol
1.6786621510403057	2.0611799139202156	1.960183999434011	Experiments	Glycerol
1.809051959538466	1.6496620388217818	2.2035041810299387	Experiments	Glycerol
1.4878742113618335	1.5003900223449622	1.7712481575847498	Experiments	Glycerol
1.5995167829476895	1.555612490419492	1.8204748301464615	Experiments	Glycerol
1.7396448819504295	1.509243951101091		Experiments	Glycerol
1.7789370417577814	1.7389540632853457		Experiments	Glycerol
1.756068928455415	2.504452465772313	2.1035431786696686	Experiments	Glycerol
1.390334784745204	1.7501732860870378	2.1191467845461585	Experiments	Glycerol
1.5606784424535938	1.8337870009450723	1.9862859198195726	Experiments	Glycerol
1.932427102384921	1.3342210613016277		Experiments	Glycerol
1.363526862393098	1.8393915132612224	2.0644599776918837	Experiments	Glycerol
1.4589853181004346	1.8957133509073598	1.8357069895490596	Experiments	Glycerol
1.7509850966249931	1.4899966578050783		Experiments	Glycerol
1.6883051978040424	1.467081597368326	1.934170671609357	Experiments	Glycerol
1.655569094813763	1.5099436528922894		Experiments	Glycerol
2.246616505316914	1.638384114198041	1.8990463437799145	Experiments	Glycerol
2.144543525772461	1.7016750448119087	1.868131283070908	Experiments	Glycerol
1.5279069321005456	1.526602088955219	1.8908820671406414	Experiments	Glycerol
1.4360968443269353	1.9132965286270516	2.223345301292921	Experiments	Glycerol
1.570111120389785	1.9129408660248663	2.3134978371504653	Experiments	Glycerol
1.559579631832522	1.2801869741181238	1.8116584664916078	Experiments	Glycerol
1.9368438000649097	1.059830861318887	1.8481502065464164	Experiments	Glycerol
1.4179037236883194	2.2331371287335204		Experiments	Glycerol
1.3960152044645184	2.0411343757892695	2.090760115950954	Experiments	Glycerol
1.361669512008046	1.7391657479114169		Experiments	Glycerol
1.5794219566681782	2.0714946010843223		Experiments	Glycerol
2.6469079098329	1.800120743766707	2.311506992877676	Experiments	Glycerol
1.7228962524025517	1.4562091836736868	1.9080954410489204	Experiments	Glycerol
1.8030423403241773	1.3567514724235532	1.9340269772045127	Experiments	Glycerol
1.8523432127170991	1.4214664706451112	2.2492574913087875	Experiments	Glycerol
1.5897628295752209	1.76586780797984	2.15346007700752	Experiments	Glycerol
1.888783130227208	1.5973708627665364	2.3168802412375884	Experiments	Glycerol
1.7793349021265596	2.0985634826197783	2.3830585913703697	Experiments	Glycerol
1.4309855597466434	2.3206046943420593	2.0359838545105715	Experiments	Glycerol
1.3997259417327266	1.6651877962220016		Experiments	Glycerol
1.3447701101878897	1.8197560684539498	1.8653210377808407	Experiments	Glycerol
1.5291337231936792	2.715366583211411	2.3531565506877423	Experiments	Glycerol
1.6631514177097575	1.845698754136083	2.0183301441498203	Experiments	Glycerol
2.0653841790336096	1.5723025314846657	2.4536746846145623	Experiments	Glycerol
1.4969609166658226	1.4735786987659039	1.8084807017868638	Experiments	Glycerol
1.5859323920252304	1.4351349334278025	1.725004371703286	Experiments	Glycerol
2.1073612383804146	1.3870443992296897	2.1980716678245895	Experiments	Glycerol
1.7070798551817905	1.915387690453986		Experiments	Glycerol
1.3965650925069937	1.8241816784612837	1.7504149733826808	Experiments	Glycerol
1.3749951744047204	1.5954496742345292	1.7324362793291501	Experiments	Glycerol
1.368368323066386	1.6388602388729052	2.17907565594684	Experiments	Glycerol
1.319438523625206	1.677298311858203	1.946003578301155	Experiments	Glycerol
1.427216294033755	1.597143638371348	1.721970533028637	Experiments	Glycerol
1.6890462364090717	2.054991546265628	1.9635591663704193	Experiments	Glycerol
1.366153173237701	1.684701376072576	1.7856928696515493	Experiments	Glycerol
1.5270572181025017	2.279859889838309	2.2514406708818706	Experiments	Glycerol
1.4202223675165728	2.075319750471124	1.7667804148236164	Experiments	Glycerol
1.463490860310679	2.0710085584505213	2.4840066522946103	Experiments	Glycerol
1.507056716508055	2.429141609824332	2.4118412547855934	Experiments	Glycerol
1.736748051560663	1.7069706167919423	1.9221173921112336	Experiments	Glycerol
1.832749644623328	1.915254327062551	2.647830133458074	Experiments	Glycerol
1.8025835782013944	1.8784323427815586	2.3722146391014967	Experiments	Glycerol
2.006607410023823	1.545313540577721	2.21144084887535	Experiments	Glycerol
1.721281384907158	2.19481065906762	1.9581773906904996	Experiments	Glycerol
1.6573489081273673	1.3548937734091915	1.887216717842708	Experiments	Glycerol
1.8053222115246002	1.2835343786965898	1.9743700849396069	Experiments	Glycerol
1.228196391663854	1.7031352016282366	2.060174225362119	Experiments	Glycerol
1.5403906130342906	1.517622105345042	1.9979870977232705	Experiments	Glycerol
1.5356500436599263	1.8297975910256503	2.1212962255066685	Experiments	Glycerol
1.2917579143247107	1.89877151240727	2.008888707139928	Experiments	Glycerol
1.819636623517103	2.026147396295819	2.4265249117385808	Experiments	Glycerol
1.8300575498562173	1.6933874250471364	2.4308002404607496	Experiments	Glycerol
1.4635542908232653	2.115409284523097		Experiments	Glycerol
1.405741971521776	1.770926089359705		Experiments	Glycerol
1.6605135895089225	2.056494069378147	2.484379546263156	Experiments	Glycerol
1.7127043769927548	1.6175283479589422	2.204064337937507	Experiments	Glycerol
1.6738972551016216	1.9978925181653773	2.3510003496638365	Experiments	Glycerol
1.672722554220754	1.9344061567806414	2.2252747484584505	Experiments	Glycerol
1.7305425457753623	1.6371171192779979	1.9576174187440647	Experiments	Glycerol
1.7935497077039353	1.4945151550821587	2.1568799341994405	Experiments	Glycerol
2.2014897273887186	1.7578106293889024	2.583659824987146	Experiments	Glycerol
1.6754317540112007	1.7269422395184262	2.0512956487384213	Experiments	Glycerol
1.8396771483664238	1.844231217514096	2.35059115682099	Experiments	Glycerol
1.695636745050054	2.237350080012314		Experiments	Glycerol
2.101020728277497	1.6245475926265827	2.5598257552183292	Experiments	Glycerol
1.815172705703054	1.8500983634111325	2.3486606570124917	Experiments	Glycerol
1.6876201365445043	1.843056523898693	2.12547971089602	Experiments	Glycerol
1.6293822547759995	1.6865390016789807	2.202603017367853	Experiments	Glycerol
2.110428942921467	1.6621544908405448	2.770903588361979	Experiments	Glycerol
1.5888464362037373	1.6934377378836083	1.8058712860988229	Experiments	Glycerol
1.6823983999260237	1.5406051229670916	2.281770392141178	Experiments	Glycerol
1.7781708767588367	3.149220629452042		Experiments	Glycerol
1.6570792315187963	1.663974674839931	1.9489209589601997	Experiments	Glycerol
2.1086480036165804	2.0071711339708216	3.1882792589492746	Experiments	Glycerol
1.5342557433234691	2.0605668943078372	2.3990102611484887	Experiments	Glycerol
1.547929756827791	2.4222017192708187		Experiments	Glycerol
1.5598399960353342	1.8940989734108473	2.1218723561140997	Experiments	Glycerol
1.6005479045126592	2.11099662140772	2.1787473723684165	Experiments	Glycerol
1.46929594725534	2.404072882996539	2.5655030481295764	Experiments	Glycerol
1.8582036020699029	1.8986950511168752	2.4754404477439476	Experiments	Glycerol
1.708471209966689	2.5987397667249326	2.5115174396021915	Experiments	Glycerol
1.7477977723747535	2.0290733136611445	2.5375478263511138	Experiments	Glycerol
2.2211626173414816	1.8105220374913324	2.860351131256279	Experiments	Glycerol
1.8561599408166845	1.90144814561387	2.5196701998879876	Experiments	Glycerol
2.1776111454684104	2.3278018218413923	2.8505348705163	Experiments	Glycerol
1.778053573982768	1.6808000295289391		Experiments	Glycerol
1.7606050029108822	1.600326633940043	2.5215099139410695	Experiments	Glycerol
1.8569643284331259	1.8734777992187948	2.3058158502646213	Experiments	Glycerol
1.986982730776582	2.6819414565332798	2.5239483125958504	Experiments	Glycerol
1.835494857837579	1.924365609237325	2.674532711451311	Experiments	Glycerol
1.6860557650691574	1.7664273476277157	2.225151229704077	Experiments	Glycerol
1.74617443969613	1.4175532297313542	2.128750593805626	Experiments	Glycerol
1.9692501340655784	1.6070506423506048	2.208687037751917	Experiments	Glycerol
2.5166490215510704	1.061519456808126	2.5166490215510704	Experiments	Glycerol
2.1840628699368025	1.2028080272190809	2.1840628699368025	Experiments	Glycerol
2.158515782450059	1.84207453606205	2.3483779855854894	Experiments	Glycerol
2.3373633996815646	2.217079855028507	2.874987404260952	Experiments	Glycerol
2.2046591093964913	2.132828485402303	2.3273044024300793	Experiments	Glycerol
2.1247314748640496	2.5458750497429663		Experiments	Glycerol
2.22787637712239	1.4672101239419297	2.2849555952150338	Experiments	Glycerol
2.250608777312925	2.519654748878418		Experiments	Glycerol
1.634514486547197	1.6770311653177878	2.0851023858768203	Experiments	Glycerol
1.8506592286892012	1.945579460214602	2.351448519578825	Experiments	Glycerol
1.9733916102625335	2.726434413686447	2.5356330331337156	Experiments	Glycerol
1.7777596970681588	2.2838893847329316	2.1289383955083383	Experiments	Glycerol
1.513240391377189	2.2800608830291273	2.236296710898758	Experiments	Glycerol
2.2446313945651934	1.454329030468831	2.3957464708068374	Experiments	Glycerol
2.3225971770943357	1.666273652688027	2.439642917192004	Experiments	Glycerol
1.8546260816395386	1.3642857778864268	1.8832493555148546	Experiments	Glycerol
1.9766621216813307	1.4222044876540763		Experiments	Glycerol
1.8044384565326326	1.5708923673014412	2.088347359716037	Experiments	Glycerol
1.7848443983469184	1.6157317825009125	2.266137936933906	Experiments	Glycerol
1.7799233017516454	1.5311095132356043	2.2714371416102797	Experiments	Glycerol
1.5127020911470903	1.7680598062741084	1.9909380253390894	Experiments	Glycerol
1.6494953419627696	1.7074746987299072	2.0727302442009625	Experiments	Glycerol
1.5104858503239993	1.979325052317837	1.5767657803474202	Experiments	Glycerol
1.6197559601627844	1.8728054940027241	1.9213386240513917	Experiments	Glycerol
1.7262106083283912	1.4981626262404215	2.1665417550888026	Experiments	Glycerol
1.6879692988622774	1.6837895910583667	2.0773617638938413	Experiments	Glycerol
1.708736756487933	2.254149813579411		Experiments	Glycerol
2.090211577566497	2.2880450455448074		Experiments	Glycerol
1.459538981832471	1.9635402301314957	2.188070407934557	Experiments	Glycerol
1.7626928714519217	1.755929169214168	2.355403309942603	Experiments	Glycerol
1.6346932836908579	1.4454526292544911	1.8723790832472855	Experiments	Glycerol
1.6161263879458934	1.448077125508709	1.8859957099618756	Experiments	Glycerol
1.5067271133782323	1.6935305296357277	1.9035488187773832	Experiments	Glycerol
1.3931681704197374	2.36239234616313		Experiments	Glycerol
1.6833750041884032	2.1934444521052185	2.084860262175971	Experiments	Glycerol
1.8257437833708228	1.9061615477275355	2.41093914275976	Experiments	Glycerol
2.2543450183098357	1.8312123086149916	2.780742088239248	Experiments	Glycerol
1.9247508596313263	2.1232980046960552	2.207246314665683	Experiments	Glycerol
2.2336559665990734	1.4742709984921278		Experiments	Glycerol
1.9000834368682107	1.6348943489610772		Experiments	Glycerol
1.863704871013051	1.306222579754518	1.9463571207076777	Experiments	Glycerol
2.2187031970657847	1.3592937863887937	2.3646741871644252	Experiments	Glycerol
1.6913412132218217	1.2402783039781318	1.8572328863886585	Experiments	Glycerol
1.9638411410610455	2.391735894864881	2.3441303835935696	Experiments	Glycerol
1.7464160464342762	1.76684810653346	2.4100017226332997	Experiments	Glycerol
2.213137610169566	1.9215580697739512	1.8520482633789976	Experiments	Glycerol
1.9355967259575446	1.8532973652356923	2.1732393811069377	Experiments	Glycerol
1.6690310953020657	1.4607460255796885	2.0209999023226204	Experiments	Glycerol
1.7402115262005446	1.636974345778732	2.0666003678550906	Experiments	Glycerol
2.1131179561711666	1.6435306322120806	2.1604010902956188	Experiments	Glycerol
2.1136090872577062	2.287979461537316	2.223289573657429	Experiments	Glycerol
1.9635273413686543	1.3421474675961416	2.0805246294995183	Experiments	Glycerol
1.7490091130006242	1.3138307194108971	1.8947582957764142	Experiments	Glycerol
2.134668477917019	2.094140131697944	2.14582235586915	Experiments	Glycerol
2.1327591813915197	1.6219819080947535	2.14582235586915	Experiments	Glycerol
1.9898145924910355	1.787226772275485	2.5304035318584797	Experiments	Glycerol
2.0438907639625583	2.391541136598865		Experiments	Glycerol
1.6897606515148884	3.452852425456715	2.4760207731348163	Experiments	Glycerol
1.5704701566840507	1.9436900815269775	2.1854156357861085	Experiments	Glycerol
1.5765755162010031	1.6533532707547811	1.986971357028513	Experiments	Glycerol
1.4926280854329987	2.2307445126374024	2.141194753642983	Experiments	Glycerol
1.5106331559383535	2.467134721766154		Experiments	Glycerol
1.73958223583135	1.890942204366794	2.3158181493933805	Experiments	Glycerol
1.6791692722894693	2.628985938334857	2.385285501801001	Experiments	Glycerol
2.2707211554105284	1.4451131805493254	2.2707211554105284	Experiments	Glycerol
1.6935147030913522	2.353431910170412	2.147692991069702	Experiments	Glycerol
1.7795166978762633	1.97796801739527	2.355186214778312	Experiments	Glycerol
1.6489866186472297	1.8733840646523992	2.1586306095854098	Experiments	Glycerol
2.3314863954654146	3.144211177018407	2.918861992167806	Experiments	Glycerol
1.9984305065174184	2.304465256563356	2.603402915259463	Experiments	Glycerol
2.0334372267893754	1.9731325915266242	2.186698140342432	Experiments	Glycerol
2.194844300101053	1.7998453680166908	2.250299667418027	Experiments	Glycerol
2.357748944408256	1.429777729827752	2.559382848667049	Experiments	Glycerol
1.9311965408531262	2.383167352450658	2.9149346485742766	Experiments	Glycerol
2.2270729228870447	2.228267951623308	2.8061869730675624	Experiments	Glycerol
1.868369666333356	2.503171008767688	2.6796687492000775	Experiments	Glycerol
1.7806514458625957	2.242157357693679	2.1281664047304933	Experiments	Glycerol
2.0905960689509064	1.698748382762712		Experiments	Glycerol
1.5009458732462757	1.4980779105987267		Experiments	Glycerol
1.6646099232082567	1.679700762344776		Experiments	Glycerol
2.2834390654830923	1.8268272777146768		Experiments	Glycerol
1.4754630887723	1.4179265682588922	1.812578410855117	Experiments	Glycerol
1.7302638123382723	1.0831118012846266	1.9356697444332092	Experiments	Glycerol
1.611586389694544	1.2836688796603493	1.6804569685444093	Experiments	Glycerol
1.9721504396038583	2.3234251164239312		Experiments	Glycerol
1.293190662128029	2.9278548538285714	2.208394495276668	Experiments	Glycerol
1.3471513624459577	1.924719299980943	1.7700876583217282	Experiments	Glycerol
1.424754845723215	1.7410827222398542	1.9870952189992408	Experiments	Glycerol
1.3965191787801141	1.9328751881605937	1.7353076780766061	Experiments	Glycerol
1.4704948405196625	1.6937054049770104	1.9600343188369567	Experiments	Glycerol
1.396924989391785	1.5163527920887334	1.8660445662740404	Experiments	Glycerol
1.6641360778647134	1.7928447705214032	2.3284716429195136	Experiments	Glycerol
1.8065545150006632	1.3239030077624232	2.085141055365601	Experiments	Glycerol
1.5154997496303175	1.4978374504688663	1.7655799743708207	Experiments	Glycerol
1.4634055495546159	1.686404873181861	2.025831715314591	Experiments	Glycerol
1.5831475610621581	1.6198549734555245	1.97014436351538	Experiments	Glycerol
1.2662329161523587	1.6484693081667297		Experiments	Glycerol
1.4706917680599805	1.5589264909835134	1.7376101074760226	Experiments	Glycerol
1.4611875226497202	1.83169822434209	1.8990448228456158	Experiments	Glycerol
1.6255928880223922	2.006365057694698	2.2534371780850235	Experiments	Glycerol
1.4739302777653476	1.6730870798874646	1.946547830153529	Experiments	Glycerol
1.532092089204378	2.2772437359277475	2.0571292758865054	Experiments	Glycerol
1.3850564624804629	2.0843144938730704		Experiments	Glycerol
1.5663361334187538	1.6914120584107575	2.0404692421170214	Experiments	Glycerol
1.6501700943133415	1.7027830616792021	2.102155695963364	Experiments	Glycerol
1.7918017718787826	1.9900287614374772	2.2257384091946455	Experiments	Glycerol
1.8120120284628427	1.708362398820065	2.4086460351184473	Experiments	Glycerol
1.6246089078676376	1.6496977084797082	1.8497530004527736	Experiments	Glycerol
1.685599602895748	1.5936717606731754	1.9907198839665399	Experiments	Glycerol
1.5846041741559884	1.5328341869650837	1.7881289954150592	Experiments	Glycerol
1.8012745597847262	1.487951268670572	2.2373033601034025	Experiments	Glycerol
1.5888332231593063	1.5450913966588624	1.9746111604051035	Experiments	Glycerol
1.6510520027157773	1.4006344876732038	1.846146046763699	Experiments	Glycerol
1.6536851873055012	1.828741793591107	2.102736390054529	Experiments	Glycerol
1.5054510804963297	1.7184661632768916	1.909922673389067	Experiments	Glycerol
1.2098171640643403	1.9604248605588277		Experiments	Glycerol
1.523764428314749	1.7425887733841283		Experiments	Glycerol
1.614984546042583	2.265402921514463	2.369886581347506	Experiments	Glycerol
1.4342602399792534	2.3707351848229594	2.273635687448313	Experiments	Glycerol
2.1577628374445434	1.4891400439378795	2.250284082586068	Experiments	Glycerol
2.154041105079755	1.9748082193681915	2.631480493882615	Experiments	Glycerol
2.1564122154527365	1.3865389158374897	2.1949921702695865	Experiments	Glycerol
2.2710819156867927	1.5370165391957844	2.2710819156867927	Experiments	Glycerol
1.7429262208428509	1.9545742217333606	2.835484839308274	Experiments	Glycerol
1.6409160895992179	2.7398056638164334	2.4907582310379754	Experiments	Glycerol
2.1120595328259912	2.2931230816725887	2.639070132414299	Experiments	Glycerol
1.7725536800031438	2.429837171075323	2.6958284184592247	Experiments	Glycerol
1.7969190240660442	2.35134844506421	2.19069693826254	Experiments	Glycerol
1.7986470410957338	1.7168171010943793	2.5459735003989024	Experiments	Glycerol
2.1070505986517754	1.6268808958194687	2.245355536480487	Experiments	Glycerol
2.1958685659302115	1.9065100660902519		Experiments	Glycerol
1.9067307075527518	1.6609944165484458	2.116604418992753	Experiments	Glycerol
2.354226176946972	1.7417481674665738		Experiments	Glycerol
1.607915028651663	1.4772945037048508	2.2730987521043247	Experiments	Glycerol
1.6012212441244076	1.499864199288993	2.112673307516361	Experiments	Glycerol
1.648437677629858	2.2699404879495244	2.3083832007445495	Experiments	Glycerol
1.6113229687601587	2.1719363389511743		Experiments	Glycerol
1.9425522427705304	1.628083163125431	2.331763755190204	Experiments	Glycerol
1.988521347231043	1.618572284266738	2.3343213723263516	Experiments	Glycerol
1.5499786553056696	2.204224862235012	2.1228893154606374	Experiments	Glycerol
1.4083196760025594	1.9132468553104274	1.9661537098889135	Experiments	Glycerol
1.6377061832788127	1.5263721381319164	1.9426163964835548	Experiments	Glycerol
1.9173049908687843	1.550160208176164	2.1396523881895524	Experiments	Glycerol
1.7841051220194881	1.508195578090644	2.3253142481576474	Experiments	Glycerol
1.758456279708089	2.8519601081245534	2.089807315789916	Experiments	Glycerol
1.4903850886423309	1.8255519828136266	2.0996392832974484	Experiments	Glycerol
1.4966599497396433	2.1863457003930575	2.4072770396202343	Experiments	Glycerol
1.489483066444163	2.3413992614123917		Experiments	Glycerol
1.6277369282594591	1.602152867146803	2.196775833888544	Experiments	Glycerol
1.5780409465112137	1.3714725914665677	1.8868068609519024	Experiments	Glycerol
1.3155914179891974	1.375890645560125	1.842523400018874	Experiments	Glycerol
1.5448129054616002	1.2966717345582177	1.8927751703382583	Experiments	Glycerol
2.0832602774958033	1.1815959732059502		Experiments	Glycerol
2.1288108365932437	1.995141247699522	2.025252383532066	Experiments	Glycerol
1.76694787467915	1.7229242163195142	2.2705117780782973	Experiments	Glycerol
1.468386848713396	2.2155670528905604	2.1887542274427365	Experiments	Glycerol
1.5839385798703756	1.5198113762558427		Experiments	Glycerol
1.2865039565219663	1.7794700809569606		Experiments	Glycerol
1.3564937717656547	1.9111745187401297	2.027515405582916	Experiments	Glycerol
1.8447915772319539	1.6164126284265878	2.5268954006208277	Experiments	Glycerol
1.626016095262155	1.5279768130570606	1.779760443573969	Experiments	Glycerol
1.8506923923245437	1.496484475262991	2.1846943111231143	Experiments	Glycerol
1.755347284148348	1.4011840429819094		Experiments	Glycerol
1.4429591181075565	1.4926045960243715		Experiments	Glycerol
1.5553431453471216	1.776839593950141		Experiments	Glycerol
1.4445492760798053	1.5745312980795483		Experiments	Glycerol
1.9740835283350844	2.0323169939565613	2.8600835899715302	Experiments	Glycerol
2.227016629346179	2.6477379440729565	2.9152599094928724	Experiments	Glycerol
1.9227606471091772	2.3306846306502234	2.2660338270902654	Experiments	Glycerol
1.8110791349330493	2.0878710794558835	2.020739458136765	Experiments	Glycerol
2.209970620916533	2.3520553475571835		Experiments	Glycerol
2.130181694112229	1.8552624148295052	2.4561137895498577	Experiments	Glycerol
2.052922623928041	3.197418625080275	2.5826210107914718	Experiments	Glycerol
2.4310087547364536	2.1341532815138007	2.053513684718608	Experiments	Glycerol
2.191299582018412	2.30123113807009	3.103647038816015	Experiments	Glycerol
1.7884547889060407	1.8521508476859778	2.1362490555405773	Experiments	Glycerol
1.6355935016635013	1.9046808514147304	2.3765507372070895	Experiments	Glycerol
1.8607320352933978	1.9372643588932068		Experiments	Glycerol
2.357664715148494	1.4799548177481383	2.7889493071486084	Experiments	Glycerol
2.1260644016966825	1.6464647337978446	2.9237549090070507	Experiments	Glycerol
2.3471436462137047	1.8643132757443288	2.3471436462137047	Experiments	Glycerol
1.7260201273025675	2.2277386119257674	2.297055453049503	Experiments	Glycerol
1.8742223451071305	1.7371495881594763	2.4226160385463684	Experiments	Glycerol
1.9072805799788035	2.0504665601648684		Experiments	Glycerol
1.808850569253927	2.5220258813638745	2.653804532626032	Experiments	Glycerol
2.0758754153010854	2.324144876740023	2.803513444155233	Experiments	Glycerol
1.6696138663106113	2.4499829341707744	2.5283303030122966	Experiments	Glycerol
1.9502063404130219	1.8152035048555502	2.6421454909285687	Experiments	Glycerol
1.85056372840686	2.2884684347886037		Experiments	Glycerol
2.478313373851454	2.234067446562065	3.178255434482601	Experiments	Glycerol
1.8679993765383396	1.924422173835744	2.305724964269449	Experiments	Glycerol
2.044608977308534	1.7030812016782688	2.361923563491859	Experiments	Glycerol
2.0021286541602348	1.7971652687544495	2.645167921009095	Experiments	Glycerol
2.0538865733056224	1.553022045201994		Experiments	Glycerol
1.6180038018894536	1.8179643275353017		Experiments	Glycerol
2.4670515443173384	2.074617824769293	2.7247322299433985	Experiments	Glycerol
2.3362871815875326	2.639782282192954	2.680575736322397	Experiments	Glycerol
1.7931375834820613	1.7950036116755108	2.4785615326621384	Experiments	Glycerol
1.8526771768425752	1.991222940318289	2.2822503267842884	Experiments	Glycerol
2.646039554451495	1.7063966594436706	2.71270854947668	Experiments	Glycerol
2.090260104952766	1.6166623923485686	2.23883383172324	Experiments	Glycerol
2.450849583536674	1.8296990310616064	2.445646631885971	Experiments	Glycerol
2.1555072622300844	2.76406347344644		Experiments	Glycerol
2.2135075580371444	1.6635332350000254	2.731261416968155	Experiments	Glycerol
1.7341519077779053	1.6904623525827802	2.138049522930303	Experiments	Glycerol
1.6177049509195698	1.7102708348655475	2.2977681817658158	Experiments	Glycerol
1.7494897600402797	1.6605541517482525	2.314519285121075	Experiments	Glycerol
2.2026678960684425	1.8345679115657463		Experiments	Glycerol
1.5533192149481425	2.2506255772467942	2.3188634270034076	Experiments	Glycerol
1.6592123011676898	2.173786001508919	2.176898477038739	Experiments	Glycerol
1.573603776194752	1.603419382595602	2.022407188858537	Experiments	Glycerol
1.588855722597358	2.031374495218266	2.176875803409757	Experiments	Glycerol
1.7333950300342182	1.7159754619641554	2.216291795493016	Experiments	Glycerol
1.8784854012056098	1.340843678161425	1.9900991051575074	Experiments	Glycerol
1.9214623368864463	1.6503825676790558	2.0639559322750296	Experiments	Glycerol
1.8614573916185342	2.115041274678465	2.5117546109753515	Experiments	Glycerol
1.8801755149799262	1.8880668848625688	2.3544257849035635	Experiments	Glycerol
1.6947662682632563	1.4299354394425168	1.8690529797937205	Experiments	Glycerol
1.61314476100171	1.9084722218540933		Experiments	Glycerol
1.6724155027286398	1.5024145584490276	1.9630811797356382	Experiments	Glycerol
1.972080943693782	1.5981080956381584	2.2316500125814756	Experiments	Glycerol
1.9633886954042319	2.2324817133770622	2.5289769994573623	Experiments	Glycerol
1.9062040377123461	1.666029061378666	2.274500630487614	Experiments	Glycerol
1.5263507948210422	1.7238442221393475	2.3051679532591427	Experiments	Glycerol
1.4893451771151236	1.7284317978185557	2.006793488851383	Experiments	Glycerol
1.705353847854875	1.6254800716114433	2.095426814822684	Experiments	Glycerol
1.492998125179902	1.7190290331361502	1.9898907913328185	Experiments	Glycerol
1.8094424926174228	1.5077427092653328	2.264829438524119	Experiments	Glycerol
2.089182308027343	1.3850446927420164	2.2823937768307965	Experiments	Glycerol
1.9970406648279657	1.2741609088170094	2.458255819483856	Experiments	Glycerol
1.451947224604445	2.204847167630842		Experiments	Glycerol
1.4297635535523123	1.746621533517883	1.9287017275950658	Experiments	Glycerol
1.6589669385819477	1.9540706293203751	2.3516384280659133	Experiments	Glycerol
1.4720922860704575	1.7068231851891755	1.888448458775324	Experiments	Glycerol
1.4134379428532045	2.0821380159684857		Experiments	Glycerol
1.702270564107864	1.9736504979427782	2.6428872708166375	Experiments	Glycerol
1.497688316263546	1.9010020601775766	1.9973948714641303	Experiments	Glycerol
1.5536569931038453	1.96122858356246	2.277997753207067	Experiments	Glycerol
1.7293477552651582	2.534127488551887	2.545842373417908	Experiments	Glycerol
1.780635543773114	2.3880000227264473	2.344730403337803	Experiments	Glycerol
1.659296246637174	2.022817352681762	2.3438636302215015	Experiments	Glycerol
1.5066087307228901	1.7921511393462382	1.989618973086269	Experiments	Glycerol
1.9843631601214422	2.549599694075761	2.2122752261857173	Experiments	Glycerol
2.0802097278770644	2.3798844061567124	2.480540990376169	Experiments	Glycerol
1.98515510445553	2.595217808019682	2.7238679704000752	Experiments	Glycerol
1.8919221858894166	2.423300956077317	2.2311217384192403	Experiments	Glycerol
2.0311590205679457	1.6033868526285553	2.3230617170901136	Experiments	Glycerol
2.4923169485908905	1.699408374562537	2.820737592037054	Experiments	Glycerol
2.30652468238455	1.4531065660598936	2.2182186992292117	Experiments	Glycerol
1.387520025583213	2.276413855305516	2.332406273401319	Experiments	Glycerol
1.7777250021204118	2.0856733430416874		Experiments	Glycerol
2.1087055800579804	1.5107654548690324	2.3599185927643482	Experiments	Glycerol
1.9028951789286548	2.391232631327834	2.8989388593998244	Experiments	Glycerol
2.0260809408671854	2.065303306690872	2.476627220516505	Experiments	Glycerol
2.227054709438319	3.91770976314607		Experiments	Glycerol
1.9570180230615646	3.290107436491013		Experiments	Glycerol
1.8300219684209527	1.761552003639005	2.3633562257250817	Experiments	Glycerol
1.8676658147082614	1.9409704033961273	2.534716011484751	Experiments	Glycerol
1.8581375958441761	2.108712051563396	2.487469820604927	Experiments	Glycerol
1.7596042260634557	2.2920405929371723	2.52376609963967	Experiments	Glycerol
1.6942249815019874	2.093706366045748	2.2153792681036757	Experiments	Glycerol
2.3528231620997935	2.5043028092798756		Experiments	Glycerol
1.8654609353361458	1.7504361713015688	2.186599961231885	Experiments	Glycerol
2.157662893987825	1.5519132836754763	2.5189746283684786	Experiments	Glycerol
2.422527749695154	2.5952799027314666	3.3272820213399434	Experiments	Glycerol
2.4951056378124785	3.710023999565083	3.0130224791406848	Experiments	Glycerol
2.260379994934424	1.6368465675087451	2.260379994934424	Experiments	Glycerol
1.9244345547390074	1.9772515691007642	2.239123104489162	Experiments	Glycerol
2.0013961308116293	1.8798076103241246	2.3319003680040633	Experiments	Glycerol
2.537814931073452	1.8773602426269118		Experiments	Glycerol
2.19806632699252	2.4534595796741865	2.4212957789309155	Experiments	Glycerol
2.0210977406562534	1.8497572876305148		Experiments	Glycerol
2.3996478965031334	3.1442753599316133		Experiments	Glycerol
2.6945973362031643	1.7595633800061443		Experiments	Glycerol
1.5328033054824397	1.9047724791660174	2.1266146490655546	Experiments	Glycerol
1.4381453564415245	1.8142198522373272	2.061361643404429	Experiments	Glycerol
1.997906806115346	2.1110537717466076	2.392568680711487	Experiments	Glycerol
1.5348792933978368	1.6912433416875694	2.1352806197824954	Experiments	Glycerol
1.4702478858412102	1.5754483791428524	1.7638618631868839	Experiments	Glycerol
1.689273184939311	1.7147400062718532	2.0005505218760535	Experiments	Glycerol
1.75184981265431	2.118660408930187	1.9086020902613596	Experiments	Glycerol
1.484731829750662	1.3008063356719481	1.5922467197538361	Experiments	Glycerol
1.778457580555175	2.3763337866036016	2.718293619635069	Experiments	Glycerol
1.7277792696003778	1.9026965099935922	2.2454483266672787	Experiments	Glycerol
1.686934669591473	2.7844891401702316	2.516397926809606	Experiments	Glycerol
1.8553376184451784	1.8043939675288774	2.3610745297942137	Experiments	Glycerol
1.8403870573326577	1.5813210373480635	2.1123268674256637	Experiments	Glycerol
1.860685320311961	1.8499493889892817		Experiments	Glycerol
1.8400973685013062	2.6196073831777342	2.6318609980430256	Experiments	Glycerol
1.6810988083783664	1.8690245049421068	2.2795973102818303	Experiments	Glycerol
2.0242640638080673	1.774732495317636	2.4569186445767537	Experiments	Glycerol
2.5083281120002656	1.649202104215627	1.924356113106901	Experiments	Glycerol
1.923708907335159	1.6193369633519676		Experiments	Glycerol
1.8658811184133568	1.5086553968308816	2.1885938140964765	Experiments	Glycerol
1.8031152832748754	1.8093704434796185	2.2210497578599075	Experiments	Glycerol
1.8931321252553557	2.153781394600715	2.438719914903956	Experiments	Glycerol
1.7772881244527217	1.5933478123106812	2.2593868248739373	Experiments	Glycerol
1.607722691206917	2.1315395250796993	2.3227375877186835	Experiments	Glycerol
1.5054663851787589	1.6941440847138156	1.9355887011514783	Experiments	Glycerol
1.8943555317477256	2.1293719856806286	2.261736351129702	Experiments	Glycerol
1.979500732845077	2.1240599398429127	2.6158364872313737	Experiments	Glycerol
1.822524376559891	1.6981705306258241	2.087115308552481	Experiments	Glycerol
1.700597429135924	2.2546385448729964	2.5935042180465975	Experiments	Glycerol
2.1024303473849937	2.793369880660011	3.0611040569516508	Experiments	Glycerol
1.7885682456963976	1.8987744741889157	2.035232763947658	Experiments	Glycerol
1.7139341725588706	1.9931411401451615	1.9638954421768038	Experiments	Glycerol
1.7345241355374224	1.7570817061553334	2.19009003281624	Experiments	Glycerol
1.8920629105949234	1.8752685971076934	2.4921540173481307	Experiments	Glycerol
1.7205281946134074	1.91823625406228		Experiments	Glycerol
1.8135931276421322	1.376167878651145	2.0767884001996357	Experiments	Glycerol
1.6150172075202947	1.702074840787215	1.7670535063107433	Experiments	Glycerol
1.6692476034968866	1.5781298773257557	1.4983823610656126	Experiments	Glycerol
1.4742234974390689	1.7748547669506736		Experiments	Glycerol
2.37737343049731	2.7129920098050757	2.3446637895122713	Experiments	Glycerol
2.2307320012193808	1.6576727499393908	2.293436834280632	Experiments	Glycerol
2.5804853706240403	2.5722508900552903	2.8297382785883842	Experiments	Glycerol
2.336155572599642	1.4667947413722002	2.4149904094302213	Experiments	Glycerol
2.6219850082560416	1.4062152393205452		Experiments	Glycerol
2.0125396665333977	2.1793033122810055	2.517657804187592	Experiments	Glycerol
2.503425072673391	1.9739351831361525	3.005299739274554	Experiments	Glycerol
1.9391772957821853	2.8739803753016764	2.351611843826072	Experiments	Glycerol
1.8859821914180488	1.945051362356201		Experiments	Glycerol
2.153944908588773	1.811570628979584	2.282857921202616	Experiments	Glycerol
2.3721055328748846	1.2385520656556182	2.3721055328748846	Experiments	Glycerol
2.5230180387531864	1.5494475252235547		Experiments	Glycerol
1.791706705770815	1.6164986294398525	2.3172369885980335	Experiments	Glycerol
2.131187724522099	3.078315532453491	1.6177620323155717	Experiments	Glycerol
1.4859455122149547	2.1629908593708267	2.193177055893219	Experiments	Glycerol
1.3594975395422124	2.5343380861921037		Experiments	Glycerol
2.1525639443636235	2.3268760087988714	2.793302019711791	Experiments	Glycerol
1.962106874289941	2.1145357413052324	2.4533583426254433	Experiments	Glycerol
1.7315144843451318	2.0187775230079668	2.2745052135990753	Experiments	Glycerol
1.7826135364133484	2.129082032477153	2.1526384018546145	Experiments	Glycerol
1.8414485779258019	1.5554188237322417	2.244875255810591	Experiments	Glycerol
1.671843878959	2.4853379672606257		Experiments	Glycerol
1.94773927816514	1.6607236115357515	2.5819614730739837	Experiments	Glycerol
1.6570623285250605	1.8600845969223772	2.4944546894974424	Experiments	Glycerol
2.405225981819473	2.1159488118227485	2.9500801384386524	Experiments	Glycerol
1.7376497534302475	1.5556056305454107	2.027609824785044	Experiments	Glycerol
1.7588234345393794	1.562350002384988		Experiments	Glycerol
1.7074192768112937	2.318383004235045	2.3797891218225247	Experiments	Glycerol
1.5476929141524471	2.0914357359025195	2.215116315527847	Experiments	Glycerol
2.3470743800939826	2.008644785554251	3.019459393973164	Experiments	Glycerol
2.186793991974747	2.0741895472079412	2.7071511648231583	Experiments	Glycerol
2.022339871102888	2.0214600506436957	2.3772367262444436	Experiments	Glycerol
2.05094039204866	1.4659241949163877	2.3925888212323616	Experiments	Glycerol
2.401996068530136	2.103265061760726		Experiments	Glycerol
1.8569139180344667	1.7140204537126382	2.238369601348075	Experiments	Glycerol
2.1399366851178594	1.5016072932355637	2.2935927712147857	Experiments	Glycerol
2.27197267897583	1.7668478326300399	2.8647562899585344	Experiments	Glycerol
2.661566056053322	1.9849386007537135	2.7367599489728045	Experiments	Glycerol
2.2035234606885834	2.9618493196119373		Experiments	Glycerol
1.8071009010057035	1.7599843878654795	2.2015253312649934	Experiments	Glycerol
2.0736178309649973	1.6293323815770733	2.515755534264008	Experiments	Glycerol
1.7954896652122299	2.4729185175697355	2.3281331777167145	Experiments	Glycerol
1.611191498373592	2.0654926090742523	1.6220463183405958	Experiments	Glycerol
2.1288026259876807	1.9381058935787978		Experiments	Glycerol
1.8209929599798635	1.715892083886271		Experiments	Glycerol
1.718532829232407	2.6579456734925557	2.5746080082501273	Experiments	Glycerol
1.8198464311923683	2.6662524191817605	2.754651255052989	Experiments	Glycerol
2.1769162891045286	2.045884999567971	2.735702967940022	Experiments	Glycerol
1.9009116204625198	2.064996891801939	1.9009116204625198	Experiments	Glycerol
2.001246345024906	1.8227766270227095	2.2666335334526906	Experiments	Glycerol
2.1187897337426667	1.5120240880699556	2.424191309469392	Experiments	Glycerol
1.9811580546197955	1.9343409736063544	2.5910344271775574	Experiments	Glycerol
1.7172290721672472	2.0474262275637427	2.4877536045419553	Experiments	Glycerol
1.743032816758332	1.964260437226336	2.4021487613467283	Experiments	Glycerol
2.0492326716222764	2.7712171755203703	2.747650124462396	Experiments	Glycerol
1.6223252781312631	2.4748499364492966	2.1139470604113035	Experiments	Glycerol
1.9861574317058943	2.1172759164154966		Experiments	Glycerol
2.5104972046172875	2.1551017742482665	2.649499774736688	Experiments	Glycerol
1.9932296572941137	1.7977906898525466	2.1329794605741164	Experiments	Glycerol
1.8853350504157833	1.7054247312655597	2.0817777314488017	Experiments	Glycerol
2.1713238095580327	1.866944971996579	2.2571816388010695	Experiments	Glycerol
1.6986297685038267	1.4997837943895633	2.198208623465215	Experiments	Glycerol
1.8700049341707468	2.063123805321459	2.267547415635483	Experiments	Glycerol
1.913680082818454	1.9316937257617324	2.4602217781316758	Experiments	Glycerol
1.5099900748676691	1.8416155233862113		Experiments	Glycerol
2.595274278018214	1.631563877406292	2.301581591839767	Experiments	Glycerol
1.9157843983268277	1.2611478308819952	2.270781457168321	Experiments	Glycerol
1.503274338487725	2.0924967871865983	2.4086296377178247	Experiments	Glycerol
1.5749666605715593	2.098415126539818	2.052141058958462	Experiments	Glycerol
1.8744310744617443	1.8695711391746714	2.457216204930331	Experiments	Glycerol
1.4804431714413366	1.8606814030734886	2.0186394723237973	Experiments	Glycerol
2.2021147397761918	1.6495146128891518	2.553358143807636	Experiments	Glycerol
1.6458168481165911	1.6666329093365375	1.885590859077901	Experiments	Glycerol
2.0385349267969333	2.2541417345174364	2.399186995506823	Experiments	Glycerol
1.9095968036154947	1.8649714647838658	2.327317121584052	Experiments	Glycerol
2.6819232957905546	1.278086338843028		Experiments	Glycerol
2.0169373041296277	4.56628723462078	2.6814645266590516	Experiments	Glycerol
2.1803667270418714	2.133682860303379	2.717240770856929	Experiments	Glycerol
1.9438614349309966	2.4998141089608645	2.419441400091743	Experiments	Glycerol
1.778690556082268	1.3881208722023937	1.8282265387629586	Experiments	Glycerol
2.2777288585487394	2.04034437330775	2.749187566479882	Experiments	Glycerol
1.874583807235116	1.863158142613079	2.314628104378915	Experiments	Glycerol
1.8776513916643638	1.8250141967796187	2.1887954594390773	Experiments	Glycerol
2.267709818873545	1.9338832589440473	2.660871994841432	Experiments	Glycerol
1.861305053368383	1.6542597812514865	2.143830012338709	Experiments	Glycerol
1.9088392371305254	1.7191930684249583	2.308909557981064	Experiments	Glycerol
1.875971868540449	1.4070635884866067	2.0446478214159547	Experiments	Glycerol
1.6227174862427745	1.4308692432408174	1.697676234996244	Experiments	Glycerol
1.725534235630081	2.3613199578284454	2.283625523966761	Experiments	Glycerol
1.760037033201471	2.2691303907851457	2.152855205276951	Experiments	Glycerol
1.4691034277511066	1.6644238685433286		Experiments	Glycerol
2.0864836396174185	1.8286073776968776	2.7037177096864533	Experiments	Glycerol
1.6173104360122408	1.9037310310368172	2.188720431467149	Experiments	Glycerol
2.0242352160974826	1.8970511630329616	2.674075366786249	Experiments	Glycerol
1.8105258199428889	1.8193988992940087	2.3316141631490184	Experiments	Glycerol
1.5811405305033617	1.5761680414678585	1.9013535796345002	Experiments	Glycerol
1.8144212666960617	1.5403902383760848	2.1551550802270882	Experiments	Glycerol
1.7593946066410129	1.9694204643223387	2.0552018472821487	Experiments	Glycerol
1.3377399800766063	2.8448890392951345		Experiments	Glycerol
1.8048750006897976	2.3660591071128767	2.3862129375314054	Experiments	Glycerol
1.6104721998831626	1.8502512888457092	1.9370585076563678	Experiments	Glycerol
2.059781470585893	2.017450086833862	2.5862423773771206	Experiments	Glycerol
1.6362747616624629	1.7302303735029836	2.40415164654453	Experiments	Glycerol
2.119033815756686	1.8142702742905787	2.7419702332686966	Experiments	Glycerol
1.905996887404958	2.3589296275916554	2.7683417211933237	Experiments	Glycerol
2.075293269383993	1.9142082102879052	2.5375499601380134	Experiments	Glycerol
1.7116299455447999	2.2692384550781215	2.4385514185660044	Experiments	Glycerol
1.6946213183955052	1.9047211901471677	2.228622379591964	Experiments	Glycerol
1.7902529300481562	2.3208051629666278	2.5489191605280803	Experiments	Glycerol
1.553811068868826	1.9461892340700093	2.200606753014096	Experiments	Glycerol
1.5528154127925808	2.0070748628805033	2.290964308635784	Experiments	Glycerol
1.475700696388505	1.9207583758069815		Experiments	Glycerol
1.500441505016453	1.8264749985786928	2.1715991839668325	Experiments	Glycerol
1.4597728760156246	1.684022953039595	1.9463622874307582	Experiments	Glycerol
1.5206383210017846	2.5392025076918316		Experiments	Glycerol
1.5055218805771122	2.155442665121024	2.2934317039460685	Experiments	Glycerol
1.8056483538458128	2.7511914687665477	2.3523343921721436	Experiments	Glycerol
2.2932360030593784	1.5624661578889376	2.5853712754232947	Experiments	Glycerol
1.65968428765534	1.9217312391812627	2.074921689497593	Experiments	Glycerol
1.939925745302715	2.307992598363083	2.6631154891564788	Experiments	Glycerol
1.7144470745976488	2.2152313285030827	2.346542549965079	Experiments	Glycerol
1.6922895292369047	2.485260304464867	2.57241087697176	Experiments	Glycerol
1.7233184503811314	1.934833203727917	2.247711957056442	Experiments	Glycerol
1.7410440702971959	1.878365835841697	2.4170430621915844	Experiments	Glycerol
1.8729865988125447	1.778081116805201	2.288232951602427	Experiments	Glycerol
1.9396084086474639	2.008116085285671	2.3443158959695425	Experiments	Glycerol
1.9466112882669806	1.6459394143986417	2.0531488022797073	Experiments	Glycerol
2.203896688439263	2.3483829567288663	3.0488015106810904	Experiments	Glycerol
1.7651280349510905	2.0600525694962872	2.3299520769769138	Experiments	Glycerol
1.6579689170745489	2.35243359648791	2.404900149572527	Experiments	Glycerol
1.8744309369070973	2.0838097182362167	2.425558601690455	Experiments	Glycerol
2.2064866540662575	1.989390732851232	2.5452374301862184	Experiments	Glycerol
2.2114716110236743	2.0872089163261367	2.423793888492853	Experiments	Glycerol
1.7436224020474906	1.8867811287097704	2.0126494504735533	Experiments	Glycerol
1.9036124995356247	1.6555540500763768	2.3147633571447317	Experiments	Glycerol
2.035277121205351	2.1531303579920915	2.7939905645919585	Experiments	Glycerol
2.042354004948295	2.174970809005931	2.600756532193691	Experiments	Glycerol
1.9869051051898723	1.7686130369353166	2.3832799038960317	Experiments	Glycerol
2.0661432115025757	2.738441707735073	2.8495595425603146	Experiments	Glycerol
1.8778407237704877	2.2177904396283497	2.8011193757478403	Experiments	Glycerol
1.469905735047119	2.016227547964248		Experiments	Glycerol
2.1594537879841256	2.299422658556321	2.76887464373459	Experiments	Glycerol
2.5506573052122623	1.8110206460192972	3.0127487699638205	Experiments	Glycerol
1.692712931866434	2.053753434380443	2.3477832468022592	Experiments	Glycerol
2.6650825131325178	1.60016222679236	3.0769134344022215	Experiments	Glycerol
1.8351147426453185	2.045259035501355	2.3849915360106864	Experiments	Glycerol
2.191008065947141	2.225445881148655	2.6768491582177614	Experiments	Glycerol
2.1590523635919285	1.7012684438896009	2.4966245170087333	Experiments	Glycerol
1.5616058835224558	1.5548365799719024	1.9379779684239034	Experiments	Glycerol
1.545262818266068	1.7314467691878779	1.9090282997834243	Experiments	Glycerol
1.5743528020951705	1.6310828441158183	1.9593536529599571	Experiments	Glycerol
1.9906947997083055	1.8334933479919517	2.2785942998374495	Experiments	Glycerol
2.3274423131110114	1.524332266633527	3.0302536837359844	Experiments	Glycerol
1.920714064053027	1.7805185186057886	2.3733438937145714	Experiments	Glycerol
1.950009630443598	1.8088144890676745	2.443491023704622	Experiments	Glycerol
1.77161853487353	1.9637544804546718	2.408613179304151	Experiments	Glycerol
1.7434203354796962	2.1775708552730118	2.1490138106790857	Experiments	Glycerol
1.8956792541505194	2.5355478475684947	2.2963234069034852	Experiments	Glycerol
1.6888344942544475	1.9771598422949301	1.7700575041510016	Experiments	Glycerol
1.9715375165956943	2.1202116851954895	2.6286017203408427	Experiments	Glycerol
1.9963351864952086	1.7106736669960905	2.374076487222882	Experiments	Glycerol
1.957910339327277	2.194009362947868	2.2755376680937762	Experiments	Glycerol
2.0560839328538667	1.4151985203455038	2.097505458455896	Experiments	Glycerol
2.316512332536717	1.605578445690898	1.9856933744359708	Experiments	Glycerol
1.743930568445519	2.426534312806038	2.3533793704056682	Experiments	Glycerol
1.8747983576476233	2.682040316821013	2.6513995885759516	Experiments	Glycerol
1.7587842865288756	2.04221641193346	2.2906664100226557	Experiments	Glycerol
1.9794587665245045	1.8134796906402686	1.9794587665245045	Experiments	Glycerol
2.212386313306766	1.273904895806334	2.320869497399514	Experiments	Glycerol
1.862698170110488	1.7341837520006853		Experiments	Glycerol
1.686475091682938	2.2368091860048045	2.3640021648240803	Experiments	Glycerol
2.4114032886415386	1.5154217144128386	2.4776213984681625	Experiments	Glycerol
2.124442790582342	1.489731727436717	2.1880904317728405	Experiments	Glycerol
1.9957041206081736	1.7917015184160197	2.247103775790363	Experiments	Glycerol
1.8085707623393343	1.7123233004315468	2.3871760256684915	Experiments	Glycerol
1.735356341732091	1.7799196771691719	1.9876713752323756	Experiments	Glycerol
1.7194038440196635	1.8859743223889402	2.200740675111547	Experiments	Glycerol
1.6500157570478453	2.2964207234583904	2.45819241713618	Experiments	Glycerol
1.7974348191925775	2.215232777106367	2.2871105686514763	Experiments	Glycerol
1.709290823254212	2.0198813883208113		Experiments	Glycerol
1.9932349955051942	2.0850668223264	2.666061127242861	Experiments	Glycerol
1.649559281696288	1.8727554944120266	2.382902234114554	Experiments	Glycerol
1.9048014942812708	2.152399841833166		Experiments	Glycerol
2.328854958098614	2.355406745324276	2.7734294232125745	Experiments	Glycerol
1.6375088518219945	1.9628457688688503	2.5608462002171137	Experiments	Glycerol
1.9303475859908668	1.6314413224851947	2.2360594982651687	Experiments	Glycerol
1.7347113784143058	1.5107391189850337	2.0824495606770768	Experiments	Glycerol
1.6681249180993345	2.1072964212859926	2.4356720939027805	Experiments	Glycerol
2.5453251651703486	1.3479363283088501	2.7974278500071157	Experiments	Glycerol
2.1067733509702617	1.586094611828822		Experiments	Glycerol
2.050829075403023	1.3428259464411623	2.0467230116684934	Experiments	Glycerol
2.327534220170345	1.3479645852833637	2.5016444319829736	Experiments	Glycerol
1.5430543772178498	1.9305525758849995	2.1685110679570374	Experiments	Glycerol
1.652294952613228	1.8820959057446924		Experiments	Glycerol
2.0727844479065656	2.395380090869475	2.7507441626270546	Experiments	Glycerol
1.832834831121699	2.7347255114170044	2.159240107162659	Experiments	Glycerol
1.5981305765662492	1.752598366636676	2.061280902147123	Experiments	Glycerol
1.564232925987601	1.6875119690599194	2.052801758027814	Experiments	Glycerol
2.3466602916982597	2.029904771192997		Experiments	Glycerol
2.2109587574708605	1.82105960879777	2.3244799071292475	Experiments	Glycerol
2.1625416771137416	1.2745944446620383	2.1793041115917515	Experiments	Glycerol
2.515469245423883	1.6347710219360585	2.1793041115917515	Experiments	Glycerol
1.6368980459498903	2.1619975854874873		Experiments	Glycerol
2.4049271348381076	2.788600315036085	3.0072832013293826	Experiments	Glycerol
1.8933452099533832	2.396170450039197	2.3509729428361066	Experiments	Glycerol
2.0245019093365744	2.5018224061603367	2.5050344309120804	Experiments	Glycerol
1.8163159077454563	2.3751926300746398	2.1988911040580863	Experiments	Glycerol
2.513258676509713	2.0240278457666396	2.782732776501744	Experiments	Glycerol
2.5108505029060515	2.4277544500147226	2.833232288912867	Experiments	Glycerol
2.1473072548204306	1.732976386407171	2.523345522675209	Experiments	Glycerol
2.0152127135754134	1.9431373126606513	2.081049833639166	Experiments	Glycerol
2.1739840534987382	2.1788135222909717		Experiments	Glycerol
2.4010090443025174	2.4977663996717023	2.7807008593528644	Experiments	Glycerol
2.3087595433946495	2.1439160901458756	2.5855826214971063	Experiments	Glycerol
2.426421331948654	1.709827635297203	2.6339238129562776	Experiments	Glycerol
2.173454753204299	2.263043069725397	2.328841471621702	Experiments	Glycerol
1.9893523245197842	2.6974695854744195	2.8430283024426437	Experiments	Glycerol
1.7512929649543294	2.348538126396549	2.344297298273654	Experiments	Glycerol
1.9403220467094946	1.7533238195582905	2.348079313171549	Experiments	Glycerol
2.1845852802070316	2.286596924376633	2.5335231189397946	Experiments	Glycerol
2.495184006604597	1.7069748931755733		Experiments	Glycerol
1.805009224281036	2.1741232398221904		Experiments	Glycerol
2.1198620990994477	3.351438046833174	2.883094188529542	Experiments	Glycerol
1.8821610754885922	2.9344382179793174		Experiments	Glycerol
2.4234949002889623	2.5171525991776065	2.7585830692032873	Experiments	Glycerol
2.1504501325859966	1.9912646198962891	2.417463232772616	Experiments	Glycerol
1.8055248654034695	2.1914818032194834	2.369598367182105	Experiments	Glycerol
2.2593341853596693	2.4474836468534362	2.8220873256924452	Experiments	Glycerol
2.477670939729211	2.146697948858827	2.4175745825065893	Experiments	Glycerol
2.2351553884871436	2.0516757145617284	2.294145016441075	Experiments	Glycerol
2.0284219427636625	2.1929853603961975	2.7470604307005586	Experiments	Glycerol
2.0953501736532574	3.250522228161248		Experiments	Glycerol
2.67248695057292	2.4666596698777496	2.9247221624620834	Experiments	Glycerol
1.893507146437645	1.932044833050642	2.1794774518542233	Experiments	Glycerol
1.7084671178545354	1.7824315473936816	1.7560724013219258	Experiments	Glycerol
1.9997424982204641	1.8735991780908197	2.425018176966409	Experiments	Glycerol
2.151663073338004	1.7210609848721243		Experiments	Glycerol
2.3496384276545674	1.4168840972752474	2.463173420745068	Experiments	Glycerol
1.6028988674465308	1.813003425743163	2.1797144079598643	Experiments	Glycerol
1.8194889497601807	1.8241544080739789	2.1515237723734604	Experiments	Glycerol
1.9433394657762335	1.5290714647763681	2.14073254312018	Experiments	Glycerol
1.8170701720378297	1.6924973643775882	2.035455831952933	Experiments	Glycerol
1.8759510141330147	1.8250438506805409		Experiments	Glycerol
1.6995180599019228	1.5979093826997768	2.1197058837917226	Experiments	Glycerol
1.67158458100244	1.830474167129734	1.8989206484989396	Experiments	Glycerol
1.4601608174234713	1.5958174882617406	1.7926594500051938	Experiments	Glycerol
1.7273248829021195	1.3687750338445743	2.2181533853210045	Experiments	Glycerol
1.6821306045403128	1.7367708388015717	2.3054756685994144	Experiments	Glycerol
1.4977832445784265	2.2992231056229446	1.8334682470587966	Experiments	Glycerol
1.5604995868609077	1.447663804984909	2.0388729044451384	Experiments	Glycerol
1.4155172617315042	1.6452759510745227	2.2483631654761327	Experiments	Glycerol
1.5496521460758796	1.5108401091324846	2.0344969689065002	Experiments	Glycerol
1.527489847256413	1.6154689722049558	2.09036423577216	Experiments	Glycerol
1.5616267393039571	3.9817616522485144	2.021410985589607	Experiments	Glycerol
1.4542808461626395	1.5413119103542872	1.7608490166957569	Experiments	Glycerol
1.579489142950507	1.5807396435451342	2.0202016959821285	Experiments	Glycerol
1.5236351113794768	1.6506643949576074	2.1062670851099226	Experiments	Glycerol
1.36575570124521	1.5821970177181348	1.8929213257039257	Experiments	Glycerol
1.54997505719159	1.6090952377593442	1.981332317355237	Experiments	Glycerol
2.5709483738444043	0.8290841256447576	2.351924304932485	Experiments	Glycerol
1.7991449588143964	2.4897531625816343		Experiments	Glycerol
1.4642838647868959	2.0770132810633752		Experiments	Glycerol
1.663019624786151	1.7264156419128645	2.298563210569009	Experiments	Glycerol
2.0098811378440717	2.6270346069717534	2.8825973794263184	Experiments	Glycerol
1.8633114404007904	1.4402136611147451	2.2551884433706566	Experiments	Glycerol
2.435967092032097	1.3633091904065093	2.756072966968438	Experiments	Glycerol
1.762186324069543	1.7464708512731346	2.216910683791875	Experiments	Glycerol
1.540139293217908	2.3855134658679957	2.313314775664078	Experiments	Glycerol
1.7878869343280863	1.769268348856885	2.3457013856416986	Experiments	Glycerol
1.8421381635725202	2.0614106772605085	2.8771750903324627	Experiments	Glycerol
1.7118942467512348	1.8639336396321011		Experiments	Glycerol
2.3656519026000438	2.3838607794988795	3.1021786975617216	Experiments	Glycerol
1.900485709788493	1.577364138923472	2.1848877041417385	Experiments	Glycerol
1.9209270816898847	1.8726018030002411		Experiments	Glycerol
1.9392711826952105	1.9200914090966326	2.703485291245619	Experiments	Glycerol
1.632395195467862	2.1710526427367745	2.3017710394332718	Experiments	Glycerol
2.0217826568334925	1.4266830051458315	2.0826549577549005	Experiments	Glycerol
1.6141861878861337	2.7458308400981766		Experiments	Glycerol
1.671955300140757	1.8856734108605597		Experiments	Glycerol
1.6449448871342849	1.9875015011852208		Experiments	Glycerol
1.4718590166122916	2.158006251968528	1.9536835784998856	Experiments	Glycerol
1.5504373908919102	1.6893016130176879	2.023158629444577	Experiments	Glycerol
2.208987150696275	1.573134538538734		Experiments	Glycerol
1.857126408895966	1.7469915443727975	2.3388405060355164	Experiments	Glycerol
1.6700383560481171	1.826839344320475	2.331703972055289	Experiments	Glycerol
1.6840661604604723	1.4325399793709084	2.164055661353223	Experiments	Glycerol
1.6468071666107917	1.8736307829592382	2.0683733430254536	Experiments	Glycerol
1.5500962561393672	1.6933830505343284	2.014366888218811	Experiments	Glycerol
1.802213721482621	1.8551798833162094	2.2333013324717093	Experiments	Glycerol
1.5994927085668444	1.741546954041981	2.013496211232897	Experiments	Glycerol
1.8546531746321147	2.066875410208139	2.447397092491978	Experiments	Glycerol
1.6006040828678554	1.87000017451942		Experiments	Glycerol
1.6235153079610203	1.8897534802793226	1.863474054296284	Experiments	Glycerol
1.6319668440536736	1.8352849005608094	1.917968558596755	Experiments	Glycerol
1.7549986854699722	2.072846528070177	2.591884125100018	Experiments	Glycerol
1.810054968196628	1.6372663409480908	2.0886579309082123	Experiments	Glycerol
1.5630068915466946	1.6340740198461254	1.881641084469099	Experiments	Glycerol
1.793106641062099	1.488838147602095	2.2835797318321664	Experiments	Glycerol
1.6977881959911238	1.5312414258782523		Experiments	Glycerol
1.701623887697728	1.5098283282684417		Experiments	Glycerol
1.9658482606174497	1.430026696521221	2.316170371936712	Experiments	Glycerol
1.8663049465345791	1.8438030624610997	2.2622245545775814	Experiments	Glycerol
1.5199818137779664	2.114231273974523	2.404843454647272	Experiments	Glycerol
1.794105124845655	2.3571853364816517	2.434072034438069	Experiments	Glycerol
1.459184682925379	1.5633942160734584	1.9234183395677165	Experiments	Glycerol
1.7008968084884732	2.465724396486038	2.4971101703269123	Experiments	Glycerol
1.7962494007952847	2.555862126658238	2.472599004702697	Experiments	Glycerol
1.6911912046358355	1.9015879991153992	2.319644722213269	Experiments	Glycerol
1.871436624576449	1.4831750908884802	2.2557169744110825	Experiments	Glycerol
1.9509008727297357	1.5054886217327603	2.425822402290864	Experiments	Glycerol
1.936828661012931	1.9263770166090055	2.359198727432203	Experiments	Glycerol
2.0336252970615956	1.6482310831455633	2.223004397590596	Experiments	Glycerol
1.5150036595404537	1.9885665920387778	2.413736597668404	Experiments	Glycerol
1.4668265219409091	1.6630573495818435	2.054316750683285	Experiments	Glycerol
1.426533753149137	3.60206636805027	2.288068096109932	Experiments	Glycerol
2.1102374822259966	1.272190614171469	2.166279614041098	Experiments	Glycerol
1.6891076179338567	1.8606614922588414	2.3063074309779776	Experiments	Glycerol
2.0141657131508204	2.334418214705103	2.857776265274425	Experiments	Glycerol
1.8172343425008692	1.9592970157470833	2.502631349073596	Experiments	Glycerol
2.617531744038532	2.0796996328440644		Experiments	Glycerol
1.7981463060385683	2.544190366263591		Experiments	Glycerol
1.6720709275529035	1.8695931945151147	2.433498225531942	Experiments	Glycerol
1.7295944379691164	2.6367531697464672	2.9118377381998792	Experiments	Glycerol
1.8696771998428823	1.7542781708922044	2.0877059714466486	Experiments	Glycerol
1.7683945430386225	2.289025425992392	2.4145194860286048	Experiments	Glycerol
1.7649332607051058	2.242978846331873		Experiments	Glycerol
1.8306536563277769	2.1870633716388195	2.1175000969818	Experiments	Glycerol
1.8588065894588428	1.9148116627655367	2.292727048616648	Experiments	Glycerol
1.8971834817109643	2.057764676441887	2.348179928898727	Experiments	Glycerol
1.9823874077245358	1.57435342974632	1.9823874077245358	Experiments	Glycerol
1.593133312329681	1.808233539699316		Experiments	Glycerol
1.7928471935667667	1.496009782140857	2.2955979326505593	Experiments	Glycerol
2.128047229940043	2.0029508195621823	2.4410839953244747	Experiments	Glycerol
2.081857635459949	1.3715203306984107		Experiments	Glycerol
1.9231630078477968	1.426525735212889	2.101716984320126	Experiments	Glycerol
1.7585748130004197	1.6320748597620858		Experiments	Glycerol
1.5811612315481323	1.4602622914785528	2.159047641322662	Experiments	Glycerol
1.755007160186983	1.6847338727659904	2.1129961930792955	Experiments	Glycerol
1.522853994093501	1.6348513336532517	1.690063523763663	Experiments	Glycerol
1.7384656429668548	3.094118687874891		Experiments	Glycerol
1.6212561183116065	1.7218315090415968	1.9321668637898177	Experiments	Glycerol
1.3818026245008477	1.775182948980688	1.7414758520975282	Experiments	Glycerol
1.5435716293845019	1.7397051889498432		Experiments	Glycerol
1.5084893351412008	1.9699860582076758	1.6552307398095176	Experiments	Glycerol
1.7040796957120932	1.8182475771098463	1.9088058007943636	Experiments	Glycerol
1.5579017296162967	1.5510197904617404	1.7480412469741642	Experiments	Glycerol
1.7613413011360033	1.40353710674931	1.8111866559790466	Experiments	Glycerol
1.7424144335378486	1.5470995414727884	1.7424144335378486	Experiments	Glycerol
1.3487362202360467	1.5931642608359742	1.6932254973094556	Experiments	Glycerol
1.3279386605591241	1.9884598097364392	1.8189248339102326	Experiments	Glycerol
1.430724298731879	2.5290189663267544	2.2887967008592383	Experiments	Glycerol
1.4694823249099773	2.0010895597606724	1.9569358643455281	Experiments	Glycerol
1.4616222372917569	1.9386676458212337	1.9366987650965686	Experiments	Glycerol
1.6541975368489574	1.9297496776954197	2.217941109334977	Experiments	Glycerol
2.293005167397478	1.2751722743890848	2.21696506528995	Experiments	Glycerol
1.6174283581622542	2.1658023526598758	2.503893818816203	Experiments	Glycerol
1.62841444949366	1.6960262209603945	1.661960760199481	Experiments	Glycerol
1.8192538899519535	1.5159626650509785	2.028335784637749	Experiments	Glycerol
2.198963275544836	2.9416080145720906		Experiments	Glycerol
1.89235491947702	1.332735866833306	2.05406972689503	Experiments	Glycerol
1.5469219645923298	1.9101851830651437	2.2057019786767325	Experiments	Glycerol
1.4520838229232234	1.7318434611418563	1.9767181873644122	Experiments	Glycerol
1.751519158323108	1.9060857456383258	2.429630218453575	Experiments	Glycerol
1.9157377452728246	2.252503153151311	2.439901981450014	Experiments	Glycerol
1.569851397167226	1.5547555338865489	1.9614326776720024	Experiments	Glycerol
1.7301602307315656	1.675184923041702	2.3437590658556235	Experiments	Glycerol
1.7118374357520065	1.664936742739695	2.18613380075524	Experiments	Glycerol
1.6688721890303353	2.1223344764395655	2.32912096731435	Experiments	Glycerol
1.5487863556343369	1.782901466034596	2.0925912004125427	Experiments	Glycerol
1.903010739589219	1.5627163291878088	2.1741899700295204	Experiments	Glycerol
1.7790766162186726	1.3870491466986878	2.01472168457109	Experiments	Glycerol
1.8275911004595848	2.318185324490039	2.778937726384831	Experiments	Glycerol
1.5757001654336555	1.634876086983132	2.068533087331976	Experiments	Glycerol
1.7910803748142607	2.1374621138766337	2.755363469027872	Experiments	Glycerol
1.8511806714245147	1.6803847580666431		Experiments	Glycerol
1.5390699014090876	2.3505032401359047	2.509350535215727	Experiments	Glycerol
1.3834290789390529	2.5612394609801976		Experiments	Glycerol
1.62434615525614	2.06227072680112	2.254542122927241	Experiments	Glycerol
1.393446535672387	1.7868535539976367	1.7451377288323051	Experiments	Glycerol
2.3141791980352617	1.1336385830747484	2.369093067440101	Experiments	Glycerol
1.9059181868526556	1.2171231949674295	1.9535652816385403	Experiments	Glycerol
1.738481300230798	2.4061320021596284	2.652944608541753	Experiments	Glycerol
1.6471239487449294	1.8192929595799328	2.280900713430358	Experiments	Glycerol
1.4946170642533012	2.0694178155541025	2.308000725509875	Experiments	Glycerol
1.391835742597861	1.7908335371714736	2.054115875047522	Experiments	Glycerol
1.8164046675876673	1.748770165630574	2.2181370652594135	Experiments	Glycerol
1.6590819254705484	1.6492484057216428		Experiments	Glycerol
1.785550522773559	2.0076822814195934	2.6608197076760507	Experiments	Glycerol
1.4624533389792975	1.9427436453674276	2.1767885299477996	Experiments	Glycerol
2.294094788331371	2.2405478102015985	3.041346184464763	Experiments	Glycerol
1.652216109273169	1.8383780914851557	2.1871523906499135	Experiments	Glycerol
1.771256957791239	2.3339840791571853		Experiments	Glycerol
2.531234704668457	1.9784013507083045	2.940065405888288	Experiments	Glycerol
1.9363513016828855	1.887981711196522	2.2471932853399585	Experiments	Glycerol
1.6867206137490915	1.9308532754325156	2.1438250828196677	Experiments	Glycerol
1.9926080300845168	1.4406737400063414	2.524385069322243	Experiments	Glycerol
1.7403686902186781	1.5049708476377621	1.9798458360967046	Experiments	Glycerol
1.7391731938007549	1.617271273809621	1.9835820043215049	Experiments	Glycerol
2.2044868652264364	1.7785883489449708	2.4915035704985797	Experiments	Glycerol
1.9825574006113156	1.754617300364563	2.5432336882755826	Experiments	Glycerol
1.9621352416505562	1.7075649538360105	2.3380909413220134	Experiments	Glycerol
1.5604549976769175	1.685450685696729	1.9586966189797492	Experiments	Glycerol
1.5024097148833815	2.5895474534464697		Experiments	Glycerol
1.6084030172243575	2.292771493492428	2.5610328021818196	Experiments	Glycerol
1.6445083499458455	1.598454912429671	2.1488749960815916	Experiments	Glycerol
1.4135812956178178	2.0847591690164844	1.6587053742504716	Experiments	Glycerol
1.6454221562333244	2.605480080453685	2.4585058511445794	Experiments	Glycerol
1.6499532296279817	2.0851088410759937	2.3098114792169047	Experiments	Glycerol
1.7373937371298622	1.6767641512765057	2.3121862949017755	Experiments	Glycerol
2.048398030620111	1.865003215651016	2.6538132698794823	Experiments	Glycerol
1.877816673597617	1.296411325373445		Experiments	Glycerol
1.9502899244972036	1.9823011621082547	2.6635931797962216	Experiments	Glycerol
1.7754020153471262	1.8552586298921903	2.600144484179726	Experiments	Glycerol
1.7370280663490922	2.494205098190873	2.6123180933989882	Experiments	Glycerol
1.6309725265321482	2.4647723006875806	2.47863809891982	Experiments	Glycerol
2.1102790073210014	2.064924882160025	2.8443803547393314	Experiments	Glycerol
1.730873009029227	1.818176466941511	2.4235021854229912	Experiments	Glycerol
1.9200622314489737	1.2876569476062307	2.27828989307192	Experiments	Glycerol
2.277343715610455	1.4146679394976815	1.9639311032813949	Experiments	Glycerol
2.2533114121695426	2.177262198694883	2.5043917785052767	Experiments	Glycerol
1.8191248092030654	2.813204777517256	2.4533658870990926	Experiments	Glycerol
1.6255879244252311	1.8422976587906248	2.2207691194523806	Experiments	Glycerol
1.4035037100898526	1.7606057652859526	1.9961660763004676	Experiments	Glycerol
1.6437731650893916	1.4177652237610296	1.986303333982723	Experiments	Glycerol
2.5674804612778566	2.1347520570014797	2.1689710239260687	Experiments	Glycerol
1.839898091959112	1.4254738004077436	1.888505541908992	Experiments	Glycerol
2.2550355830515247	1.3953408351844736	2.3865102887915435	Experiments	Glycerol
2.336012637759116	1.32376230006013	2.5286183220725627	Experiments	Glycerol
1.554550826267543	2.385145008583768	2.302091863791511	Experiments	Glycerol
1.460143861954187	1.8596616681691582		Experiments	Glycerol
2.3827456703459613	2.7280712613838616	2.9285232191099815	Experiments	Glycerol
2.0436353415625117	1.9392569855271757	2.1799578553934817	Experiments	Glycerol
1.7648248785598233	1.8682729868474832		Experiments	Glycerol
2.161432915262122	1.94255196538654	2.479776934365029	Experiments	Glycerol
1.7612884976055905	2.004862843980506	2.1298416527180657	Experiments	Glycerol
2.4524089577170325	2.088666555707095	2.6405889001901652	Experiments	Glycerol
2.4803098072513468	2.1069037480835187	2.74797705350998	Experiments	Glycerol
2.119617193157738	2.5345150185106724		Experiments	Glycerol
2.296229043081866	3.947361453238124		Experiments	Glycerol
2.0734922454901334	2.317447679422601	2.7624476947304957	Experiments	Glycerol
2.33946746829874	2.5939525736465665	2.8327086166637425	Experiments	Glycerol
1.9231478787399794	2.647515612666143	2.4876342336181114	Experiments	Glycerol
2.4183437017246647	1.4731336377714022		Experiments	Glycerol
1.7659917419937419	1.698537181261959		Experiments	Glycerol
1.4088746757879802	2.2961363072932373	2.165220854917186	Experiments	Glycerol
1.4429452723912657	2.09387266696064	2.289974884549552	Experiments	Glycerol
1.5455893164865953	2.2818563533690144	2.518536787643863	Experiments	Glycerol
1.5171089552802017	1.5442015269004463	1.727738438110606	Experiments	Glycerol
1.8336041103752374	1.6124159976271744	2.2217776896406263	Experiments	Glycerol
1.6121423061224174	1.6442446818824863	2.0722910191690027	Experiments	Glycerol
1.7435335374668897	1.8103064284272408	2.1897570097636487	Experiments	Glycerol
1.8544370713329152	1.3692442634238275	2.0259769555802087	Experiments	Glycerol
1.745687425101233	2.1623483786393045	2.120544171042696	Experiments	Glycerol
1.637539788266013	1.938352949683258	2.370620581317007	Experiments	Glycerol
1.4490381668416095	2.0623191870809103	2.194143750950691	Experiments	Glycerol
1.4872780694561045	2.5640804790125946		Experiments	Glycerol
2.017776399908111	1.6548788502398288	2.3296932867084115	Experiments	Glycerol
1.8159907298656683	1.7145663938112963		Experiments	Glycerol
1.6720745706753277	1.6584814463762676	2.189564846265	Experiments	Glycerol
1.8830723629574793	2.001143746236073	2.3574946304828255	Experiments	Glycerol
1.4644939357689244	1.7817707182554254	2.0135671429166115	Experiments	Glycerol
1.6688265621457057	1.9164688032317612	2.192922341885468	Experiments	Glycerol
1.7065700150549794	1.578067881727226	2.2763760183681083	Experiments	Glycerol
2.023077900692918	1.5779989077304464	2.3251916757829014	Experiments	Glycerol
1.9726133101490162	2.037765454371556	2.2108791848669425	Experiments	Glycerol
1.5472640904736592	1.9151034566576997	2.069589739922147	Experiments	Glycerol
1.679942248410666	1.8250465068041837	2.2740961299085	Experiments	Glycerol
1.7364062223934982	1.7798061908848	2.214698962450641	Experiments	Glycerol
1.6923063566732999	1.5156350392875695	2.185636635986885	Experiments	Glycerol
1.8267003086590903	1.945426879387098	2.8319361489976025	Experiments	Glycerol
1.6491339626100547	2.8019991357326246		Experiments	Glycerol
1.998998884631662	1.588450522000889	2.269990942044023	Experiments	Glycerol
1.997409664603985	2.175671805864282	1.9799436717067407	Experiments	Glycerol
1.6731568458265502	1.3532866751547195	2.1015275368119766	Experiments	Glycerol
1.5513947507396966	1.3462837720613303	1.9829666719934713	Experiments	Glycerol
1.6929496843859273	1.6736185408282147	2.1115648283310464	Experiments	Glycerol
1.9749056474207363	2.2384642888721356	2.6980575897666195	Experiments	Glycerol
1.4140342603839295	1.6332192157308345	2.0757940204414065	Experiments	Glycerol
1.5290108829893654	1.6191388713871706	2.127115437956252	Experiments	Glycerol
1.4087271918677866	1.7335169428232315	1.9867662149091991	Experiments	Glycerol
1.3382357541947805	1.839790709895878	1.9261516333803905	Experiments	Glycerol
1.8455888171211328	1.3556968728708778	2.237954585319358	Experiments	Glycerol
1.5005146868643884	1.8493034398428478		Experiments	Glycerol
2.037605431632735	1.597244921716888	2.104189708767194	Experiments	Glycerol
2.0260878657650006	1.61510043262829	2.1550466821033663	Experiments	Glycerol
2.033467988995517	1.943651046779097	2.595230737700828	Experiments	Glycerol
1.6947289884654952	1.651395020066667	2.3088300889037665	Experiments	Glycerol
1.662376753422314	1.9187470330509386	2.2088699753713485	Experiments	Glycerol
1.6414936161595504	2.313632237717168	2.3334991221744494	Experiments	Glycerol
1.8672927430575559	1.640198680175323	1.9241979722611997	Experiments	Glycerol
2.1927029054856932	1.2165787712554503	2.4186667528380625	Experiments	Glycerol
1.6999969469273923	2.2885112277544	2.4600191674159047	Experiments	Glycerol
1.556324886460807	1.922672962346232		Experiments	Glycerol
1.6275859657346319	1.397268306812214	1.8128190722034558	Experiments	Glycerol
1.7656176518930151	1.6289026688857418	2.065514662498312	Experiments	Glycerol
2.545367328489505	1.3984277885865781		Experiments	Glycerol
2.2158384347315065	1.4163573300372287		Experiments	Glycerol
1.434406468472265	1.476966374734062	2.0203497282333034	Experiments	Glycerol
2.0581544144756125	1.8882583401972308	2.3118757092440076	Experiments	Glycerol
1.842876684219487	1.3798159312251161	2.0809519864336137	Experiments	Glycerol
1.833253242122257	1.5172617734368785	1.833253242122257	Experiments	Glycerol
1.6949742424306038	1.7047307705525436	1.742826794271223	Experiments	Glycerol
1.6205673679210293	1.3955323849135042	1.8703534808936506	Experiments	Glycerol
1.6749255021733702	1.7003653997707684	1.7608904244593921	Experiments	Glycerol
1.5998318004992556	1.684862971988715	1.9466145672434405	Experiments	Glycerol
1.44181769427064	1.6789160603209408	1.9815003315002593	Experiments	Glycerol
2.007182510070023	1.5009142322219016	2.41777062331597	Experiments	Glycerol
1.8205475095008714	1.5601517172501238	2.1667224709980264	Experiments	Glycerol
1.7447201822170306	2.0159808137449673		Experiments	Glycerol
1.5832098937464796	1.7481797249269695	2.2468775490805912	Experiments	Glycerol
1.3240375295559514	2.2011552231536227		Experiments	Glycerol
1.4816297904224867	2.0936214685399053		Experiments	Glycerol
1.6095809140051103	2.0261568124105285	2.2549961598759882	Experiments	Glycerol
1.646559702160641	1.9406791896339821	2.204936256271644	Experiments	Glycerol
1.7849920130749841	1.975691730674018	2.416079287697621	Experiments	Glycerol
1.5118213094827664	2.277093690170215	2.0179248484970937	Experiments	Glycerol
1.830590700351826	1.6676910502285784	2.3338077437792775	Experiments	Glycerol
1.9966907217392698	2.2041851578439737		Experiments	Glycerol
1.8192581268597263	1.934601230841781	2.3354547249644764	Experiments	Glycerol
1.7780248920615824	1.6609523959905246	2.3768079089025247	Experiments	Glycerol
1.8903005949458567	1.7318093824650338	2.3090463133901253	Experiments	Glycerol
2.0511610609059745	2.035848416265304	2.7282982986243227	Experiments	Glycerol
2.049109870301782	2.1194705340864286	2.373432513749497	Experiments	Glycerol
1.9331711064101942	1.7200769168538494	2.3720071907786613	Experiments	Glycerol
1.5416401577449312	1.949553658723673	2.3457172526858914	Experiments	Glycerol
1.5473524574966964	1.5858716108131048	2.085551655836841	Experiments	Glycerol
1.5408147929782572	2.2332977112999775	2.4393304994683485	Experiments	Glycerol
1.4620448394630283	2.0159918808816046	2.309948227194657	Experiments	Glycerol
1.5082600888000497	2.3458383213498815	2.2815609475025145	Experiments	Glycerol
1.6139684384656166	2.4892887566379462	2.6784222704205565	Experiments	Glycerol
1.7548400099997779	1.9919609100295872	2.2393579611390533	Experiments	Glycerol
1.9441587783526668	1.2686173303920774		Experiments	Glycerol
1.7239047260833833	2.0339246586306414	2.004539601284348	Experiments	Glycerol
2.0048451712196242	1.8520903606522974	2.5785392064789074	Experiments	Glycerol
2.0158366071086737	1.6832741539901872	2.53116863652803	Experiments	Glycerol
1.8907176673534665	1.9748788221964084	2.336970877508787	Experiments	Glycerol
1.709075910443659	2.5501212862619442	2.6426015036100163	Experiments	Glycerol
1.7817117012019084	2.205512570638546	2.525991197489725	Experiments	Glycerol
1.7878567900269748	2.1912145631782725		Experiments	Glycerol
1.7312923003312288	2.2999631805007645	2.2739454951868274	Experiments	Glycerol
1.9423838172900292	2.448532084320634	2.549226398530609	Experiments	Glycerol
1.8480427508692114	2.348260386613463	2.5134490067710864	Experiments	Glycerol
1.80379062296194	2.348717195470707	3.006999094407365	Experiments	Glycerol
1.9146131465593117	1.8033875787543938	2.0959692843702755	Experiments	Glycerol
1.8096513885628716	2.174129301442308		Experiments	Glycerol
1.793659957655089	2.1702147655311905	2.510964873202863	Experiments	Glycerol
2.230277126629467	1.4790102765874948	2.5791830151879576	Experiments	Glycerol
2.2433263866000344	2.4950716713584375		Experiments	Glycerol
2.162725675327064	1.568534542499234	2.3379635517731963	Experiments	Glycerol
1.8941580370917517	2.376043706544884	2.504788287334849	Experiments	Glycerol
1.8928692515962795	2.3403835264825195	2.8307232322959246	Experiments	Glycerol
1.882847665287082	3.424471299964405		Experiments	Glycerol
2.3578588482189837	1.4539972117872422	2.2631824237958895	Experiments	Glycerol
2.4729290561083563	1.6807515910660897	2.2631824237958895	Experiments	Glycerol
1.9020731437312766	1.7324030612136119	2.2086296305414743	Experiments	Glycerol
1.7221481323350418	1.7817177417480088	1.8893248260201496	Experiments	Glycerol
2.068461192362225	1.539895332377859	2.3578112711556587	Experiments	Glycerol
1.9555517587392717	1.670732134258155	2.1558348943370085	Experiments	Glycerol
1.7614672478835767	1.6721769063704006	2.1234457593890634	Experiments	Glycerol
1.7328439155481752	1.8720634967261025	2.2120978592414557	Experiments	Glycerol
1.7610623588941072	2.1010485182414067	2.2880107938382555	Experiments	Glycerol
1.8755379044326432	2.3133526732773806	3.084301717943786	Experiments	Glycerol
1.9820906377530503	1.763129032107337	2.9882455055920736	Experiments	Glycerol
1.8453731405954457	2.263116356112884		Experiments	Glycerol
1.89756575425688	1.6694993318548235	2.5120331553453146	Experiments	Glycerol
1.6991792993850134	1.8739180807164029	2.197756755954766	Experiments	Glycerol
2.031613390416023	1.4838531805704887	2.3056686315032375	Experiments	Glycerol
2.1589704433634154	1.45666134755694	2.3162403799221796	Experiments	Glycerol
1.669193332802566	2.181874789490527	2.4738038305355103	Experiments	Glycerol
1.7126389968011955	1.7369985743294736	2.241972626890676	Experiments	Glycerol
1.6970545516377515	2.1694205457369424	2.1103756417867237	Experiments	Glycerol
1.7452911990006224	2.1003954628056283	2.256198716316652	Experiments	Glycerol
1.7466951750054673	1.7273800755330142	2.34529793343904	Experiments	Glycerol
1.6850269056166114	1.9335519400873566	2.154264433142394	Experiments	Glycerol
1.8097198519173971	1.8440277609975635	2.1441874125343143	Experiments	Glycerol
1.6086010054328341	1.6941893395765824	2.063469748991939	Experiments	Glycerol
1.668030385609207	1.6144157036282232	2.167743781335643	Experiments	Glycerol
1.671271260997571	1.5814809880474159	2.0408362387677017	Experiments	Glycerol
1.6558005980868649	1.7416588610693056	2.371816899435254	Experiments	Glycerol
1.4773557827357784	2.2012781656927114	2.3601516515847227	Experiments	Glycerol
2.1760992632982594	1.6814401029368873	2.529927567594422	Experiments	Glycerol
1.725875900505521	2.109145078849354	2.5092992751831424	Experiments	Glycerol
1.553896227431048	2.445226176823164	2.3082194150420063	Experiments	Glycerol
1.9043818483956594	1.7500425341850567	2.3100699387519876	Experiments	Glycerol
1.7568042557306693	2.039571159227159	2.0849185968940627	Experiments	Glycerol
2.029810975198383	2.2603805403201376		Experiments	Glycerol
1.7374869131250748	2.0298595506126125	2.5068794268313312	Experiments	Glycerol
1.6702613146127339	1.9866066020155244	2.248397839518593	Experiments	Glycerol
1.8787717710162555	1.3372089170890316	2.2650111345805706	Experiments	Glycerol
1.6486739271214812	1.813868995215316	2.1315054398048354	Experiments	Glycerol
2.066565554950841	2.74330093756396	3.323696378045836	Experiments	Glycerol
1.647418172834225	1.7291189230587662	2.092633034003907	Experiments	Glycerol
1.9333455693465238	1.477007597239755	2.2610319146114315	Experiments	Glycerol
1.8716957764877444	1.5579366090327726		Experiments	Glycerol
1.9238848881891115	1.153464885473576	2.463464651234901	Experiments	Glycerol
1.528524653692686	2.086998234046411	2.2884290287667763	Experiments	Glycerol
1.741343222423706	1.7704000436418885	2.2845933772117664	Experiments	Glycerol
1.9191934363219767	2.0180096617702104	2.223990447683207	Experiments	Glycerol
1.9767122277785318	1.7225633004160577	2.6442930991277773	Experiments	Glycerol
1.8635563307810978	2.0163535978438194	2.5606495380793644	Experiments	Glycerol
1.7491174693698204	2.024485025082731	2.4942720857495306	Experiments	Glycerol
1.9321421127368068	1.7864535241972264	2.4411194260812588	Experiments	Glycerol
1.9225379523733195	2.3047475073988717	2.1702962623340447	Experiments	Glycerol
1.933085916138921	1.9293686120894584	2.665760431525321	Experiments	Glycerol
1.720331947136231	1.629760811594608	2.1826561219014624	Experiments	Glycerol
2.052013919034264	1.6442212386368538	2.3902404961127037	Experiments	Glycerol
1.9767990755885319	1.9117928101838608	2.2852097358781363	Experiments	Glycerol
1.8222081878724228	1.7653216226999242	2.0565215559507046	Experiments	Glycerol
1.6043110360427597	1.9248487529917526	2.499648074200925	Experiments	Glycerol
1.6223331414678894	1.8139184170456228	2.051151903696934	Experiments	Glycerol
2.077401477031841	2.3825847798538278	2.7329571681960356	Experiments	Glycerol
1.6917698774998366	2.023813704890271	2.2574911786948375	Experiments	Glycerol
1.8076785065873966	2.5012187621891235		Experiments	Glycerol
2.0057046396902183	1.8315050993286488	2.3447434746923888	Experiments	Glycerol
1.7303803208560518	2.924086131158519		Experiments	Glycerol
1.6644715339356102	1.681507637280109	2.1296325498522894	Experiments	Glycerol
1.7430296976321793	2.353322043400632		Experiments	Glycerol
1.8605442229473588	2.1266785262444534	2.128419084859677	Experiments	Glycerol
2.0663716699850543	1.5570148629907723	2.4404895404085214	Experiments	Glycerol
1.5596520973755794	2.197111885892219	2.0906907267007138	Experiments	Glycerol
1.7335952542786703	2.0331322034101063	2.5553827198309107	Experiments	Glycerol
1.7808739942474319	1.8149308049696964	2.2508894412596128	Experiments	Glycerol
2.044964198133336	1.935748932398086	2.599110663775307	Experiments	Glycerol
1.8322704702060213	2.144554279823419	2.1765957449346045	Experiments	Glycerol
1.8279428082303013	1.6924740000644303	2.166486318942203	Experiments	Glycerol
1.861472945333492	1.6852367217398543	2.3817910817517136	Experiments	Glycerol
2.08850459567272	1.937468778461676	2.5268977369934746	Experiments	Glycerol
1.8935235410417743	1.7442729929302894	2.111212708577004	Experiments	Glycerol
1.9770428771484367	1.6946930652552472	2.2269939674833794	Experiments	Glycerol
1.7931116541091783	1.5712490736936486	2.3264568995650734	Experiments	Glycerol
1.7958826085761603	1.4759115518596144	1.912933366499419	Experiments	Glycerol
2.0416096439597315	1.4516214992202698	2.2222984561228056	Experiments	Glycerol
1.8234991262574343	1.763904297108812	2.4174268086080786	Experiments	Glycerol
1.8218894588807775	1.6653569709618554	2.3032502880789822	Experiments	Glycerol
1.402544568354128	1.8663090149605366	1.7203564869261694	Experiments	Glycerol
1.6804839737882473	1.8270804028941343	2.1266556942897417	Experiments	Glycerol
1.802309572476266	1.5868086489434865	2.245035656101519	Experiments	Glycerol
1.6432729974368765	1.5470553151652433	2.2594879798581666	Experiments	Glycerol
1.7092417102342587	1.7859626251270913	2.2031339382305584	Experiments	Glycerol
1.5858221575562854	1.6070683749226966	1.8758476909815007	Experiments	Glycerol
1.8948260700974078	1.5591306186601142	2.2936887076833696	Experiments	Glycerol
1.6182552691452734	1.6162042117862734	2.1347592490639125	Experiments	Glycerol
1.4976041974800034	2.2079674740127775	2.121910752933949	Experiments	Glycerol
1.332023061645174	2.8553071706787643		Experiments	Glycerol
1.6174447450720058	1.8044315294662279	2.090077682987454	Experiments	Glycerol
1.7062758401161633	1.5508385988624334	2.2447585345815315	Experiments	Glycerol
1.4308358011366331	1.9768377211950239	2.1275138474521724	Experiments	Glycerol
1.783995557313097	4.669924029456011	2.410405448482846	Experiments	Glycerol
1.7394496397888126	2.368490254138596	2.337241346873125	Experiments	Glycerol
1.7244325408519678	1.733534568627554	2.323537202425738	Experiments	Glycerol
1.5377165151014482	2.321037985599207	2.346728754646167	Experiments	Glycerol
1.9890672855574847	1.8846464379934256	2.547826745475827	Experiments	Glycerol
1.8829803821428954	1.8414638238982688	2.330307293885369	Experiments	Glycerol
1.8717693433933034	1.7824922670736856	2.339383550378324	Experiments	Glycerol
1.6330249827507248	2.8187654792591506	3.3864959766635367	Experiments	Glycerol
1.834396063790469	1.7326963818047274	2.1564874179402977	Experiments	Glycerol
2.002967375307526	2.0268591392483786	2.270745290790133	Experiments	Glycerol
1.5855016319770343	2.260418585096015	2.1166833974701396	Experiments	Glycerol
1.8819047726573586	2.20275164632015	2.6414458966191083	Experiments	Glycerol
1.9278553140717019	1.8941665737349298	2.42185059531197	Experiments	Glycerol
2.4019373286362042	1.4021868522818126		Experiments	Glycerol
2.0938070804878586	1.272598326580844		Experiments	Glycerol
1.8482200133585411	1.4692568845565155	1.8149824625408963	Experiments	Glycerol
1.9856910613560153	1.2233958269476755	1.8862720415006597	Experiments	Glycerol
1.6157408503051376	1.4929872220028977	1.6665541429842328	Experiments	Glycerol
1.984918690344314	1.7925421266947354	2.200168186470622	Experiments	Glycerol
1.8671134522019788	2.0698933237481367	1.945766258559355	Experiments	Glycerol
1.497003099801801	1.9014044098503287		Experiments	Glycerol
1.8490700745447592	1.492841631087525	1.8972697911403276	Experiments	Glycerol
2.0618570580496436	1.9089425012023242	2.0618570580496436	Experiments	Glycerol
2.6007313342443235	1.5088158725159753		Experiments	Glycerol
1.8252607708198605	1.1773232194735264		Experiments	Glycerol
2.126261502487895	1.5328254891907775	2.4054570032539755	Experiments	Glycerol
1.9265711774647412	1.4827869124829856	2.2220659710726904	Experiments	Glycerol
1.4682779763943141	2.1146430453686094	2.2342295459725503	Experiments	Glycerol
1.4031154694396026	2.1913755815322364	2.032520741317686	Experiments	Glycerol
1.826931987684661	2.27638242956386		Experiments	Glycerol
1.8408533730110304	2.3385280221395686	1.9280188667571887	Experiments	Glycerol
2.0656888442410812	1.5293914730124194	2.116058516869183	Experiments	Glycerol
2.0674923329625803	1.3158622317801014	2.1718722092095555	Experiments	Glycerol
1.8568228906052695	2.017678005964025		Experiments	Glycerol
1.8874142872958837	1.5851501685268787	2.132179943008352	Experiments	Glycerol
2.08893544632879	2.308882565665023	2.7383761557017885	Experiments	Glycerol
1.9473410944800538	1.6429543233758417	2.2309192003628757	Experiments	Glycerol
2.031758500174529	2.1185620931659153	2.8355450179076134	Experiments	Glycerol
1.6789258897103099	1.8238381054248478		Experiments	Glycerol
1.7890418526862681	2.7496362568991826	2.5150022872021967	Experiments	Glycerol
2.1313837045039707	1.8496132547434718	2.5831394848372957	Experiments	Glycerol
2.212896255813207	1.9171384367054554	2.6684486364125672	Experiments	Glycerol
1.7371149816569265	1.5483238652380185	2.1134256433038185	Experiments	Glycerol
1.9714541859557755	2.663114009471248		Experiments	Glycerol
1.7366387955292222	1.8638283758094372	2.2638868629232043	Experiments	Glycerol
1.6028772116507461	1.726360106328932	1.9564827678994468	Experiments	Glycerol
1.9885655051568418	2.1812257720134003	2.3059760086663563	Experiments	Glycerol
2.2858487253194775	1.6527447533618065	2.4467195654799525	Experiments	Glycerol
1.7385408605063821	1.9248371565316997	2.7774834693125636	Experiments	Glycerol
1.8016164256429372	2.019455761759043	2.275081866085334	Experiments	Glycerol
1.6592264802279284	2.8160237885916533	2.599213152935325	Experiments	Glycerol
1.536083977514405	2.0062097957820306		Experiments	Glycerol
1.67451347265412	2.410101685943608	2.325756821859272	Experiments	Glycerol
1.9612431583533299	2.115649221090047	2.6930463247129794	Experiments	Glycerol
1.8358921198086269	2.140935054489808	2.392989104074809	Experiments	Glycerol
1.7350856697369714	2.7166328464873484	2.529319149744685	Experiments	Glycerol
2.3488683870726863	2.1679814588002095		Experiments	Glycerol
2.0788884215956203	1.5544685622641663	2.479721056416971	Experiments	Glycerol
1.9104059330224852	1.4496205059149407		Experiments	Glycerol
1.9727968595169547	2.0873366755659046	2.5093910869011715	Experiments	Glycerol
1.7814959761221145	2.103829527797246	2.3275063118274666	Experiments	Glycerol
2.528915898578839	1.5411153030331017	2.6908561164653735	Experiments	Glycerol
2.028068601157115	1.6524577534661837	2.1313343391802904	Experiments	Glycerol
2.0459538072330834	2.2175217633880684	2.651169258243165	Experiments	Glycerol
2.0338025287362744	2.436436053235402	2.664240593580958	Experiments	Glycerol
1.7873706348490457	2.1834841679922548	2.168980674117485	Experiments	Glycerol
2.0541377140078754	1.9338177281317441		Experiments	Glycerol
2.0766229159092178	1.5520088048079588	2.2334339304810653	Experiments	Glycerol
1.8038939867478516	1.5295735526513592	1.8574208103232752	Experiments	Glycerol
2.3939793929450492	1.362688732185953		Experiments	Glycerol
1.8276464540735384	2.0345168353007885	2.235504843799875	Experiments	Glycerol
1.71216265859713	2.2083186762767797		Experiments	Glycerol
1.8928777077668975	2.3597171300200386	2.705265920173725	Experiments	Glycerol
1.7964854234043324	2.2481880795739997	2.0477269595352654	Experiments	Glycerol
1.8850922022482477	2.3382277864932632	2.533866755830288	Experiments	Glycerol
2.1135458923753547	2.0255198947000586	2.737015870923367	Experiments	Glycerol
1.6516135732493216	2.510354755293339		Experiments	Glycerol
2.114673447386255	2.873549497128285	2.2862586496954833	Experiments	Glycerol
1.9153524575022254	2.013442977705078	2.4128918754096422	Experiments	Glycerol
1.9853980339930584	2.2536131141954403		Experiments	Glycerol
1.9329294895419278	1.8707368317927495	2.3193494969950166	Experiments	Glycerol
1.8706506972095678	1.7765056418420397	2.3162233623140187	Experiments	Glycerol
2.3245066412186337	1.507957653428555	2.794682257692069	Experiments	Glycerol
1.8232919671313932	2.3223985835685346	2.713142900092721	Experiments	Glycerol
1.9985002832693886	1.5307101903739466		Experiments	Glycerol
2.0219919728112523	1.827552102140059	2.2996969064407193	Experiments	Glycerol
1.7804998204391869	1.9542305560230775	2.543565149934474	Experiments	Glycerol
1.8678137244990773	1.6623512237563498	2.505711972976236	Experiments	Glycerol
1.8336353548349862	2.074646260403628	2.677006415075076	Experiments	Glycerol
1.7108364468470674	1.7448662346416537	2.2782497546824265	Experiments	Glycerol
1.481941121903478	2.5257064818920223		Experiments	Glycerol
1.947953686942868	1.600873414279195		Experiments	Glycerol
1.9336979175749842	2.269251797534788	2.3479022967785346	Experiments	Glycerol
1.5883959873705413	2.4846026606999194	2.3452100166815053	Experiments	Glycerol
1.66596368244759	1.9710653496229744		Experiments	Glycerol
1.9336292794426932	1.8017877831041802	2.3338758605196244	Experiments	Glycerol
1.8532303200663596	2.149021488642704	2.4397708847166464	Experiments	Glycerol
1.978877983985705	1.6809862348940914	2.3644045895406904	Experiments	Glycerol
1.8800881896582435	1.7206346325202215	2.5143788856104274	Experiments	Glycerol
2.0606087190577234	1.3857767604175346	2.0037028395085446	Experiments	Glycerol
2.084249054038597	1.5279169547256006	2.084249054038597	Experiments	Glycerol
1.6811892516524776	1.8069095952903573	2.1781641395800904	Experiments	Glycerol
1.5433697272823743	1.5725802535349034	2.0020622186962873	Experiments	Glycerol
1.6308175576282413	2.0755097207790056		Experiments	Glycerol
2.1698285731539912	1.7144687284455742	2.333653130065881	Experiments	Glycerol
1.6227294637840528	1.4071944841649937	1.9327607227728276	Experiments	Glycerol
1.812363059404327	1.829352417466472	2.569068041750091	Experiments	Glycerol
1.5001362197366557	1.7384718066721045	2.013370205897638	Experiments	Glycerol
1.9143495075448134	1.7338647960253541	2.2609686981963235	Experiments	Glycerol
1.8087808842087174	1.7037065624456442	2.3475708639166752	Experiments	Glycerol
1.4844969123210374	1.5183451717435772	1.9869210953884782	Experiments	Glycerol
1.3433443955507012	1.9392929118992575	2.0999315297381833	Experiments	Glycerol
2.630069513994862	1.207706684659906	2.4482147407148633	Experiments	Glycerol
2.313102734127228	0.8336438403096889		Experiments	Glycerol
2.044148163484469	1.181601410720115	1.8826346896928503	Experiments	Glycerol
1.882016817237909	1.3998877829398073	1.8174655673972269	Experiments	Glycerol
1.5644616785089416	1.3847735098943619	1.6937633523140596	Experiments	Glycerol
2.187583510041031	1.1939599135862768	1.6937633523140596	Experiments	Glycerol
1.5932610385694501	1.437972829831551	2.008383474328813	Experiments	Glycerol
1.4450360725514595	2.310930724030877	2.1284247763740503	Experiments	Glycerol
1.6197866002542485	2.368641797294773	1.7274717130394042	Experiments	Glycerol
1.4540452247092244	1.4993701775576005	1.4887992287946994	Experiments	Glycerol
1.3682148995083334	2.064397511168705		Experiments	Glycerol
1.499254338471905	1.7597386772737	1.8204440808900053	Experiments	Glycerol
1.4272301639082552	1.8200101328857974	1.7662609338186177	Experiments	Glycerol
1.3585016407106048	1.699108067460114	1.6416047733747272	Experiments	Glycerol
1.3233214672276237	1.751271842321818	1.7668228625517322	Experiments	Glycerol
2.197557963133094	1.1691172381796089	1.8302100978587668	Experiments	Glycerol
1.7902000299988332	1.1221264303244385	1.7161205997090758	Experiments	Glycerol
1.6856920499220929	1.5044863827235122	1.9150741132702138	Experiments	Glycerol
1.5679286091495295	1.557754525965669	1.700495704477578	Experiments	Glycerol
1.5016025400054556	1.2728645443493432	1.8771949962035754	Experiments	Glycerol
1.4491152049548484	1.6768705077265655	1.6387940006617578	Experiments	Glycerol
1.4545926425032099	1.4585365305762068	1.6624359294042115	Experiments	Glycerol
1.3769380381111032	1.6722428088883898	1.5532016738746797	Experiments	Glycerol
1.3110097650464536	1.8200222549315352	2.0260339466218884	Experiments	Glycerol
1.3814509198526828	1.9668417501618694	2.150698023648973	Experiments	Glycerol
1.7502542409797806	2.279480580683177	2.0368131892284618	Experiments	Glycerol
1.418500775403577	1.9230219986906174	1.6183707319433183	Experiments	Glycerol
1.579720213003488	1.6927973570939787	1.7466585383881514	Experiments	Glycerol
1.4796260537134187	1.6917073657162973	1.742207235083008	Experiments	Glycerol
1.4668781054396898	2.2740984028882525		Experiments	Glycerol
1.5666422798000537	2.2832888697586085	2.4262447237513824	Experiments	Glycerol
1.5668449930930823	1.987010742194624	2.296186303716261	Experiments	Glycerol
1.5950022910280242	2.4569828229315016	1.991441842276457	Experiments	Glycerol
1.9096637195406898	2.22720967679664	2.4048197106120344	Experiments	Glycerol
2.192245971708854	1.5849454731646775	2.3238332673406172	Experiments	Glycerol
1.8404849445770586	1.5595590077670411	2.080859327725638	Experiments	Glycerol
2.271672804908152	1.770028622036913	2.334860527537312	Experiments	Glycerol
1.8962126970476685	1.4718654418363368	1.8522535695036408	Experiments	Glycerol
1.944133113468106	1.4593253878252717	1.944133113468106	Experiments	Glycerol
1.7157463396107688	1.680085078747921	2.035055891330394	Experiments	Glycerol
1.7037599001623531	1.6098363263642168	2.1606470005263896	Experiments	Glycerol
1.6705550306355113	1.7298825892131817	1.9953968990144841	Experiments	Glycerol
1.6829785189426854	1.6075616628098042	1.97680505502597	Experiments	Glycerol
1.8093389248807272	1.6259850819147375	2.4366842259825487	Experiments	Glycerol
1.457120617127091	1.92437405477063	2.060829757249868	Experiments	Glycerol
1.5840021517477172	1.6629392647404113	2.0976481539967953	Experiments	Glycerol
1.5995172288389001	2.321021982314342		Experiments	Glycerol
1.8243649001167506	1.8885174648704823		Experiments	Glycerol
1.5093981906613594	1.569745606507494	1.873397472299923	Experiments	Glycerol
1.804847821827204	1.7876668070577992	2.3364141243318706	Experiments	Glycerol
1.53235913925004	2.246597038385724		Experiments	Glycerol
1.68819863972391	2.605722659431536	2.304448767909507	Experiments	Glycerol
1.7322198013730923	1.9194301353608474	2.271850643541158	Experiments	Glycerol
1.946636013396458	1.653410400547418	2.0897538778977074	Experiments	Glycerol
1.7111803011857345	1.4196821327548734	1.8398395809112196	Experiments	Glycerol
1.7980790777772848	1.8565012852213545		Experiments	Glycerol
1.7999937984178411	1.8163502195246404	2.2543042730159657	Experiments	Glycerol
1.5815767599618762	2.3004678897580733	2.2760737108164846	Experiments	Glycerol
2.011823695624864	1.8068809691115901	2.563908471663898	Experiments	Glycerol
1.9051097443695217	2.1814293660283246	2.5958871404807136	Experiments	Glycerol
1.9075228267463844	2.0402200060593576	2.5516516692000897	Experiments	Glycerol
2.039694576052718	1.6940427352156462	2.668497186993588	Experiments	Glycerol
2.1118956343177917	1.7983386777744128	2.414522294355616	Experiments	Glycerol
1.8210293515863485	1.704865641331718	2.358319699016647	Experiments	Glycerol
1.7218107228118493	2.453524672406103		Experiments	Glycerol
1.8143589861590355	1.807542869142489	2.20182596188638	Experiments	Glycerol
1.886555820489091	1.5086332150748862	2.2314251158201643	Experiments	Glycerol
2.1936574393664086	1.7445540784894562		Experiments	Glycerol
1.9426444149880708	2.3029843032777055	2.3539175116363045	Experiments	Glycerol
1.965975151348262	1.8182542366019454	2.24108284034907	Experiments	Glycerol
1.6077980078251	1.6906322378406302	1.9661321972783932	Experiments	Glycerol
1.7126038215528396	2.7577837810480306		Experiments	Glycerol
1.974315767897533	1.368035103527847	2.184665573436146	Experiments	Glycerol
1.9063637635597348	1.5842550979528385	2.170190784805397	Experiments	Glycerol
2.2594329535531608	1.1371903199151614	1.876286113049297	Experiments	Glycerol
2.3263450621336985	1.3386249308972968	1.955104828842957	Experiments	Glycerol
1.4716188424020507	1.6872234653546396	1.933175447233852	Experiments	Glycerol
1.570749196741852	2.3129005290639864	2.531601034283837	Experiments	Glycerol
1.5128519758738317	2.096691993404491	1.9828478164082077	Experiments	Glycerol
1.6930911476145678	1.5239369354270098	2.0170178966888783	Experiments	Glycerol
1.3878688912187065	2.6992087438133514		Experiments	Glycerol
1.5287968456766474	1.9338715639332509	1.931060205716442	Experiments	Glycerol
1.5292153765908698	1.7978401777980122	1.902901184822336	Experiments	Glycerol
1.6099624553818488	3.0787654710060943	2.681541346039364	Experiments	Glycerol
1.5881275269864463	2.761365489917697	2.1904332955752164	Experiments	Glycerol
1.8659964407332812	1.553183050427996	2.145881213518812	Experiments	Glycerol
1.4447784547292908	1.4543281919996305	1.6809471863461438	Experiments	Glycerol
1.9965912180142118	1.6316802193233315	2.0541967742106375	Experiments	Glycerol
2.384878160563883	1.1854509002433509	2.0834800888835763	Experiments	Glycerol
1.5219267339041789	2.0085081619655623	1.8113437452650543	Experiments	Glycerol
1.665582462788467	1.7027773149292684	2.3136476937500037	Experiments	Glycerol
1.7017046505547648	1.9065244409124265	1.9191537661603832	Experiments	Glycerol
1.76720989248679	2.3725329150365346		Experiments	Glycerol
1.612110858812822	1.9284437897932294	2.11453243477796	Experiments	Glycerol
1.7931207812058265	2.221557075882769	2.233959597622395	Experiments	Glycerol
1.7577064905289592	2.742118456869669	2.5600359349690525	Experiments	Glycerol
1.5213554983405129	3.1669056014497334	2.3863994554769525	Experiments	Glycerol
1.6259369657811054	1.8979289166216884	2.423703737186511	Experiments	Glycerol
1.4578062054247798	2.0387110609156327	2.0799301333246434	Experiments	Glycerol
1.5222401078206267	1.5722776385770154	1.912134594523144	Experiments	Glycerol
1.8494519447185829	2.21300561800283	2.6783331561026684	Experiments	Glycerol
1.5376799874601643	2.1283254352031475		Experiments	Glycerol
2.274375217434903	1.5078422827547562	2.6380725005891184	Experiments	Glycerol
2.1914425291013626	1.6898258026897048	2.279556352630724	Experiments	Glycerol
2.1138199310735573	2.2115921728331838	2.6836208418246	Experiments	Glycerol
2.2599216620826974	3.779813835405914	3.0038400467688504	Experiments	Glycerol
1.7400097116346942	3.976316187967752	2.7180889373108648	Experiments	Glycerol
1.8446848188878249	2.6847135871044383	2.834656992450007	Experiments	Glycerol
1.7833731525641372	2.771305612154218	2.557782320712959	Experiments	Glycerol
1.9075079240879826	2.626241266289531	2.857122642076536	Experiments	Glycerol
2.0973473311001456	2.200655072243795		Experiments	Glycerol
2.4331911898116187	1.6006819991657775	2.4331911898116187	Experiments	Glycerol
2.0744965162696585	1.341946605110584		Experiments	Glycerol
2.023854146751316	2.3490217585728033	2.708819417400615	Experiments	Glycerol
2.219629034035284	2.414882807501602		Experiments	Glycerol
2.635804868464053	1.6289390854010435	2.739291337764009	Experiments	Glycerol
2.104068317391104	1.507713384344302	2.5193029144001557	Experiments	Glycerol
1.9701207560701899	1.849774925352999	2.403036920502239	Experiments	Glycerol
2.523918334164714	1.6788970102177823	2.8319366020419743	Experiments	Glycerol
2.385812978599511	2.642990658989985	2.8585133346001954	Experiments	Glycerol
1.9126463899100627	2.2462610199914366	2.6780416720602656	Experiments	Glycerol
1.9194222170252055	1.9084124659922186		Experiments	Glycerol
1.9427735349442645	1.6520963888865994	2.3228121150107177	Experiments	Glycerol
1.9253060593093627	1.7462697166188201	2.2153687268699866	Experiments	Glycerol
1.6620358623318994	2.8548897645620146	2.698751138910154	Experiments	Glycerol
1.8530257764270037	2.2236780579602358	2.4557099402944216	Experiments	Glycerol
1.708896953177825	2.016125643529743	2.4583400640913635	Experiments	Glycerol
1.7552602403497086	2.0634637114323517	2.6882165417811996	Experiments	Glycerol
1.898819074621913	1.2263754050721343		Experiments	Glycerol
1.7195470714071226	1.5236858179858006		Experiments	Glycerol
2.018647031873377	1.1657718649927302	1.8608824206095294	Experiments	Glycerol
2.134904366758684	1.656479818219334	1.8608824206095294	Experiments	Glycerol
1.846626266793422	1.8077541784363709		Experiments	Glycerol
1.5458714032125336	1.5610808289690428	1.919808356271435	Experiments	Glycerol
1.355379937354863	1.7233951182195633	1.8668591507020336	Experiments	Glycerol
1.4988277605872424	1.7401067278772024	1.7382313615947749	Experiments	Glycerol
1.5392190546964999	1.6610244164012609	1.9055317361538102	Experiments	Glycerol
1.5171741408623602	1.5707416187337566	1.8457579409349765	Experiments	Glycerol
1.5259431240171317	2.0058669500687962	2.0184810572853915	Experiments	Glycerol
1.4909687058679462	2.0348007632084437	2.447249762342442	Experiments	Glycerol
1.4863453393124328	1.800792054301283	2.001619507060164	Experiments	Glycerol
1.431734398828751	1.6059764463228503	1.8213832173175446	Experiments	Glycerol
1.4126421990544102	1.9265590025233847	1.8626070253528244	Experiments	Glycerol
1.632194709271021	2.40418375469289	2.509293289468604	Experiments	Glycerol
1.4652346126709916	1.7237876412626185	2.1616349800652253	Experiments	Glycerol
1.4684404682094538	1.8448555997965908	2.0529368849735414	Experiments	Glycerol
1.514555832450925	2.149722145829087	2.0924952449188923	Experiments	Glycerol
1.8298353225542228	2.039612167313611	2.5049651939563553	Experiments	Glycerol
1.6200480806771242	2.307880662398664	2.1275381142271717	Experiments	Glycerol
1.939946027931212	2.8398461531506296	2.720488598072298	Experiments	Glycerol
1.9483933452687991	1.732489610817738	2.5015742063687374	Experiments	Glycerol
1.3962725874412523	2.0102341910308135	1.9720045236980766	Experiments	Glycerol
2.03100503417164	1.633557683355129	2.3959520615314984	Experiments	Glycerol
1.9249337348198332	1.632568812902131	2.0836870139120527	Experiments	Glycerol
1.6426306576886969	2.2235589850332214	2.65508732002278	Experiments	Glycerol
1.8380624290496212	1.6851874880325817	2.7472421153491617	Experiments	Glycerol
2.6286584415827177	1.3883316907403644	2.345418152121007	Experiments	Glycerol
2.3163510726710523	1.8815764563151252	2.345418152121007	Experiments	Glycerol
2.1038397222420695	1.5380752713318704	2.5076916852249123	Experiments	Glycerol
1.9197944881847107	1.9634800661799157	2.4921093508586427	Experiments	Glycerol
2.2265155166235835	2.655775975934311	2.6783081610572412	Experiments	Glycerol
1.8268381159997775	1.5032438816589877	1.9293234896561946	Experiments	Glycerol
[truncated: 57,849 more rows]
