# Supplementary material for: Initiation of chromosome replication controls both division and replication cycles in E. coli through a double-adder mechanism
Source: eLife journal article supplement (doi:10.7554/elife.48063), 2019-11-11
Supplement: supp [file elife-48063-supp-v1.zip › elife_poa_e48063_Figure_5_source_data_2.csv]

means	standard	datatype	condition
1.7645986612527311	0.25338802036655667	exp	Glycerol
1.6812828664757993	0.2340122476890938	exp	Glucose
2.1091570138938174	0.29008045008163263	exp	Glucose +AA
1.816170290529839	0.2589343059214672	simul	Glycerol
1.7931455088842005	0.3504322450635535	simul	Glucose
2.133770824160332	0.3610244084100153	simul	Glucose +AA
