# Supplementary material for: Initiation of chromosome replication controls both division and replication cycles in E. coli through a double-adder mechanism
Source: eLife journal article supplement (doi:10.7554/elife.48063), 2019-11-11
Supplement: supp [file elife-48063-supp-v1.zip › elife_poa_e48063_Figure_5_source_data_3.csv]

numori_born	condition	data_type	fraction
1	Glycerol	Simulations	0.900145960333133
2	Glycerol	Simulations	0.099854039666867
1	Glucose	Simulations	0.18662996877150267
2	Glucose	Simulations	0.8133700312284974
1	Glucose +AA	Simulations	0.07772426001399696
2	Glucose +AA	Simulations	0.9222757399860031
1	Glycerol	Experiments	0.7953439888811675
2	Glycerol	Experiments	0.20465601111883253
1	Glucose	Experiments	0.15454545454545454
2	Glucose	Experiments	0.8454545454545455
1	Glucose +AA	Experiments	0.013054830287206266
2	Glucose +AA	Experiments	0.9869451697127938
