# Supplementary material for: Initiation of chromosome replication controls both division and replication cycles in E. coli through a double-adder mechanism
Source: eLife journal article supplement (doi:10.7554/elife.48063), 2019-11-11
Supplement: supp [file elife-48063-supp-v1.zip › elife_poa_e48063_Figure_6_source_data_1.csv]

dL	L_b	L_d	T_bd	lambda
40.984458018380046	37.00818544863579	77.99264346701584	81	0.013277699382542984
17.968980643236662	36.324243056865136	54.2932237001018	42	0.013805700307972537
33.2692219229881	24.996800299514874	58.266022222502976	90	0.01356568207725556
26.2319912275736	26.474781445071564	52.706772672645165	66	0.015051054265634516
23.927763728599185	26.3085538853522	50.236317613951385	72	0.012961093990762708
15.160590798421751	38.34361232227976	53.50420312070151	33	0.014565635482326393
17.06460445946798	38.93739406019873	56.00199851966671	33	0.015888544849723265
25.26871610933215	27.962029139864814	53.230745249196964	66	0.014072586470986182
31.25029508090529	27.892892879867595	59.143187960772885	84	0.012908505246329796
32.75820552289635	22.35288503354983	55.11109055644618	99	0.013150319468129392
30.00279487874213	27.158428178682527	57.16122305742466	84	0.012781390488086356
25.6511045656831	26.266586255158984	51.91769082084208	78	0.012602532111013086
28.28611820902002	29.274285094352837	57.56040330337286	72	0.013547816129634294
28.071308614302822	31.51275629464039	59.58406490894321	78	0.011781930807707489
25.687210909985666	29.061244794254975	54.74845570424064	69	0.013242344508478048
21.743314036955923	24.270792163825668	46.01410620078159	72	0.012817430673107
25.071731266225296	29.05048761245536	54.122218878680656	66	0.013600888000406458
32.65115390264181	27.22477265146053	59.875926554102335	87	0.013069610054765335
46.36884882661648	27.83090302486611	74.19975185148259	144	0.009824490567222722
32.443178841947386	26.904674267726943	59.34785310967433	81	0.014090604955950081
33.31694799139861	25.448735347931514	58.76568333933012	99	0.012195757209444609
19.212404529528918	35.280902974568775	54.49330750409769	54	0.011614658764996
25.28167006327735	29.00261943978796	54.28428950306531	69	0.013106543759420448
29.416364491092317	39.722377152288836	69.13874164338115	63	0.012691148949354525
25.021438379708435	34.635997498045676	59.65743587775411	51	0.015380975443104277
29.223300260347887	28.1827260103335	57.40602627068139	132	0.007775689611161777
25.55296294100479	26.893996659953782	52.44695960095857	90	0.010706388598353938
22.44610182928044	25.019382400595834	47.465484229876274	72	0.012831008666102199
24.23251536910286	26.679653523016537	50.912168892119396	78	0.011952187124105099
24.789124890952188	32.92430395039924	57.71342884135143	60	0.013495901755110066
40.89346849605832	25.094516800218685	65.987985296277	132	0.010566903060400904
28.127439650190393	24.715251007396045	52.84269065758644	99	0.01107376130753765
26.739259452968923	29.726932169055708	56.46619162202463	63	0.014692329323707273
21.779000687638696	28.592009923360227	50.37101061099892	57	0.014333011164403157
24.111434379282528	23.391850968065093	47.50328534734762	75	0.013626950258981769
29.77529291580193	25.338636047131562	55.11392896293349	84	0.013346167975489109
27.83448303171809	26.010445693507936	53.844928725226026	81	0.012959498192040416
24.708882604914074	36.82347452303794	61.53235712795201	54	0.013717027755073457
28.80604766930634	23.239458810228346	52.04550647953469	90	0.01292441263053458
32.717865008077325	29.166115239977284	61.88398024805461	90	0.01205858611784342
25.44196871722973	30.708860265405608	56.15082898263534	69	0.012618150045857071
18.478109341889763	32.35296574034876	50.83107508223852	54	0.012070606974353472
19.05692486574332	37.2243880134664	56.28131287920972	45	0.013253507831756002
27.38660895089503	25.717625675215274	53.104234626110305	96	0.010896556808384153
35.00348618941017	27.919736159752322	62.923222349162494	87	0.013474795931237415
31.989589841641116	25.563071249216375	57.55266109085749	111	0.010547941069155874
37.46709858650388	22.481766075132132	59.94886466163601	111	0.012747541074708492
27.222586076868797	29.77003160973729	56.99261768660609	93	0.010074347356505031
30.1554131680601	25.454013292951657	55.60942646101176	102	0.011053297216414968
25.061318768764817	29.46454277503079	54.52586154379561	69	0.012868996835548364
29.199037241521868	30.283139533629285	59.48217677515115	78	0.012486444400967082
31.357354458998103	28.026582376982986	59.38393683598109	81	0.013373789009035972
28.098036877390626	24.43830766773509	52.536344545125715	87	0.012691625732235475
40.066788811411456	27.911197308063976	67.97798611947543	108	0.011890959341516188
32.652629520188974	28.324509541144046	60.97713906133302	99	0.011173914022988318
34.36325459380246	27.316142447240786	61.679397041043245	93	0.012634783866887558
30.18085903575028	27.034624210222503	57.215483245972784	93	0.011630078591779112
27.203065697800344	28.652680139348373	55.85574583714872	81	0.011889328443216031
30.0801862802281	31.218614482856967	61.29880076308507	93	0.010467229454800065
25.510398428533094	28.420241653966116	53.93064008249921	75	0.01232248446742066
45.41515449166953	33.07819565327009	78.49335014493963	129	0.009664262754113091
38.097629439230005	32.78087122529827	70.87850066452827	105	0.010595179887740128
37.25270142594253	31.094233383479466	68.346934809422	93	0.01221752246750502
31.1076727719163	22.291084885837066	53.398757657753364	87	0.01448665913288502
22.917073796538574	35.32952931666844	58.246603113207016	66	0.010928778587728932
29.72534222609419	33.432424905064174	63.157767131158366	87	0.010548415720373149
25.94058193835334	43.66658877097303	69.60717070932637	66	0.010192516715744133
20.481791998043256	33.799979232783464	54.28177123082672	54	0.01265639698170152
40.19834358325578	22.462836989034788	62.66118057229056	111	0.013333619854522194
31.058849683386676	39.97507262741188	71.03392231079856	102	0.008131446025633541
24.370888943145694	30.17031345085065	54.54120239399634	78	0.010951497697748655
35.135674256855054	23.20963658958174	58.345310846436796	144	0.009235366521764994
33.43066389357537	28.959343248694108	62.39000714226948	111	0.00997555035854011
25.418479923119826	38.89981477866318	64.318294701783	69	0.010513998121715506
23.36360715601369	29.818871233344407	53.182478389358096	84	0.009937206713734036
29.228101126381773	32.86496564621715	62.093066772598924	81	0.011331872976205833
32.15412314962029	29.215424115754868	61.36954726537516	84	0.012747532234163908
21.19053410570705	25.277158950260414	46.467693055967466	84	0.010457067889665703
20.542697617889587	26.536052847493025	47.07875046538261	84	0.009846693325704575
18.91271641997476	29.63621836058844	48.5489347805632	51	0.013962319076948794
18.71446132095315	32.065993522675484	50.78045484362863	69	0.009612017528584121
25.679725693993042	28.01030021462291	53.69002590861595	81	0.011588847589778397
26.020284594484025	29.742012337483793	55.76229693196782	75	0.012090503014522101
25.254809136212796	29.09185852153728	54.346667657750075	78	0.01155866809903043
24.35389434964335	24.232614877492	48.58650922713535	108	0.009292645304824482
45.238611071304646	29.69653023128249	74.93514130258714	120	0.011127900525901837
30.31187996422885	27.36016493034655	57.6720448945754	105	0.010245669051180786
36.59446981151335	27.109749780129956	63.70421959164331	117	0.0105348473372258
33.63562363839593	26.974263730674785	60.60988736907071	117	0.00998264598352747
21.111579766781137	30.96440647313079	52.07598623991193	66	0.01136374945883725
21.577701900134215	34.18296447869243	55.76066637882665	57	0.01238544357886684
41.69686627640456	26.168474385250295	67.86534066165486	108	0.012730047678285112
35.01420265714791	32.91988072771998	67.93408338486789	84	0.01244257697190801
25.028341185504104	42.09072683492184	67.11906802042594	54	0.012467041863909858
37.50754945895588	25.871231351470545	63.37878081042643	126	0.010259136398443072
34.90260199973563	28.94910888037937	63.851710880115	102	0.011188297425570742
26.11684280590054	26.183862836678372	52.30070564257891	111	0.008992364517852406
33.03705566702775	23.496218642070055	56.533274309097806	201	0.006301849065129415
33.580110915955785	29.640487200122873	63.220598116078655	69	0.015838051057040028
31.087303287491068	25.200113893290663	56.28741718078173	90	0.012882024397352943
24.868412413481586	27.21073671404625	52.079149127527835	81	0.011562097045066153
29.25321576103284	31.83462586915428	61.08784163018712	63	0.014925213625092403
21.644062643661297	28.720885482236195	50.36494812589749	60	0.013505329986774606
28.515029029063374	22.707545144242236	51.22257417330561	93	0.0126194409524863
28.48696225739719	25.68099289555293	54.16795515295012	90	0.011963762755000135
30.51374743124507	23.826205868697055	54.339953299942124	96	0.012390250973361876
28.14780154909495	28.064447270237565	56.212248819332515	87	0.011518860766046909
18.670053514382197	33.24887855753374	51.91893207191594	48	0.013394896405738895
32.393943411294075	26.171399102825017	58.565342514119095	63	0.018445335158355874
21.499138144748795	28.024850961356055	49.52398910610485	54	0.015211496780653123
41.91962532713525	21.183141090652235	63.102766417787485	114	0.013813918617974595
29.595793950556132	26.678368711710593	56.274162662266725	81	0.013293854711078492
32.83622521079866	28.44532504713722	61.28155025793588	96	0.011533971115548434
26.619164318958454	25.95111718578169	52.570281504740144	81	0.012573466826125843
34.94605909508627	26.421143568837934	61.3672026639242	111	0.01095292712285854
31.312716119154278	26.738080439139498	58.050796558293776	105	0.010651618736075525
24.279236906539552	30.262432285309984	54.541669191849536	84	0.010117034607766195
27.020026825501862	28.477039880583998	55.49706670608586	75	0.012834831073141517
32.13709217941695	27.99272533075893	60.12981751017588	102	0.010814006153288189
23.610090856686398	28.940457967644164	52.55054882433056	81	0.010624914561152325
36.607796579046486	32.242114936983974	68.84991151603046	111	0.009860436207277511
37.96836354260071	29.72265205201027	67.69101559461099	144	0.008245843846638236
32.04238307429041	29.64570834588744	61.68809142017785	102	0.010364399437884938
34.91918227252873	27.520999541395735	62.44018181392447	93	0.012709052361471313
21.02295309646584	31.583490226835885	52.606443323301725	81	0.009087270428488366
19.250893358106207	31.179121806392434	50.43001516449864	48	0.014452132616119771
17.809737683544604	32.025493098622626	49.83523078216723	42	0.015189172034340866
29.597037589106407	36.58957666662903	66.18661425573544	105	0.008143873792550313
13.384174460381772	42.83258385181747	56.21675831219924	36	0.010896987633331372
26.715758354793202	41.53694785616762	68.25270621096082	69	0.010383928105822548
27.018155793848734	29.606626537957325	56.62478233180606	87	0.010753028554293232
29.33452952304916	23.6897758585696	53.02430538161876	84	0.013837967476536182
16.189502262436314	31.929141096249325	48.11864335868564	45	0.013149382749478026
18.502081711626637	36.33028893671615	54.83237064834279	45	0.01319677798901346
31.844108897680297	22.988471559085593	54.83258045676589	114	0.011001077377353173
25.185530222381622	22.855867547736764	48.04139777011839	84	0.012758494597633226
35.92732827034439	24.40206464092477	60.32939291126916	96	0.013602685900104501
36.53655851965749	27.060289657014703	63.59684817667219	93	0.01325567726818968
35.73535544824178	28.961859794468445	64.69721524271023	111	0.010446390695977479
24.668148144710198	25.39905265841914	50.06720080312934	96	0.01019886573345686
35.86043916485767	31.739371036451256	67.59981020130893	66	0.016526449342569874
23.285541723822437	28.13331223706788	51.41885396089032	81	0.010740963443474182
27.496358554211124	29.107650826579228	56.60400938079035	75	0.012793411151253558
28.6659594692895	23.370062540316187	52.03602200960569	108	0.010693047054304482
25.351373419061492	25.618843106877254	50.970216525938746	90	0.011027212820856667
20.665270169891585	35.4723139562484	56.137584126139984	75	0.00883031379590823
22.771335886104765	30.00191042013485	52.77324630623961	69	0.011808005260404809
31.030505279766622	25.324936630248274	56.355441910014896	111	0.010396362798065361
38.97884786106111	23.215540451793505	62.19438831285462	126	0.011283282123813673
54.55183667688639	31.73534795766239	86.28718463454878	162	0.00890775089776216
46.4371398292552	22.88974897919482	69.32688880845002	156	0.01024816266878255
25.89023994266219	26.221935066687543	52.112175009349734	93	0.010654261458843416
27.233862550148768	28.662236605411398	55.896099155560165	99	0.00973329709644307
26.68584698617361	35.13177443798319	61.8176214241568	96	0.00849210102188954
26.21077164696555	31.633987865779932	57.84475951274548	96	0.009069904436677606
20.01196571395404	43.73611930603531	63.748085019989354	51	0.0106579762395889
22.602257053901027	42.94490386372543	65.54716091762646	48	0.012709299001211455
28.380594717678097	28.850803065918466	57.23139778359656	78	0.012669171355831671
21.460174477367914	34.54897056920482	56.00914504657273	69	0.010101734522882622
40.13700927136763	31.916406042287147	72.05341531365478	114	0.010304987805773352
30.207097986102887	27.96679246946475	58.17389045556764	99	0.01067330292830023
26.238170152065766	27.409248143479974	53.64741829554574	84	0.011533880839935624
36.2813646063883	26.73840137527828	63.01976598166658	93	0.013299905207553532
29.575039482509624	32.9122919161433	62.48733139865293	90	0.010277080380432173
35.73002458274863	23.598911379528555	59.328935962277185	129	0.010310198445808176
32.46491226427455	40.407802758559505	72.87271502283406	72	0.011815900521570345
27.61413625836858	27.32594562302644	54.94008188139502	87	0.011581467113709767
22.63467031789385	42.0768359071254	64.71150622501925	63	0.009857079949482173
28.780029987072872	29.143860377985717	57.92389036505859	75	0.013212886845392896
30.263883665190917	32.24564909115118	62.5095327563421	87	0.010976686299852711
25.699601311222494	26.514309473202026	52.21391078442452	75	0.01303550724654354
22.20926104681725	30.230784488227012	52.44004553504426	66	0.01204015940805942
27.645641122621022	23.07134722903806	50.71698835165908	78	0.014568805479900665
28.78693656500635	22.779358035637102	51.56629460064345	93	0.012674207437755249
23.33335146396898	21.037710804753956	44.37106226872294	93	0.011576788866829614
26.556047103376724	27.626842472452726	54.18288957582945	117	0.008305697876356589
26.43868188190837	27.376181876720526	53.814863758628896	117	0.00833404660696421
22.59381436945346	25.817614920819267	48.41142929027273	87	0.01042519495102366
26.75048220633557	27.28591829628885	54.03640050262442	81	0.012170061463845167
25.828305864876267	24.494671055000342	50.32297691987661	84	0.012366063711482625
25.054276866357103	22.900559048789095	47.9548359151462	108	0.0098730878759248
22.650817198637863	22.695781836703485	45.34659903534135	87	0.01147781799731619
21.835969789700357	31.313661640915797	53.149631430616154	75	0.01017689957955827
20.991618912974463	24.811409712158348	45.80302862513281	66	0.013400595291443522
36.30954929130756	27.134230831380975	63.44378012268854	183	0.006695982071784661
30.66518396129392	27.242434418314396	57.907618379608316	90	0.012087750364770701
22.332554953874237	22.22013244812394	44.55268740199818	90	0.011151611566139691
28.36162648296169	23.683818092768952	52.04544457573064	117	0.009708292436125485
28.484561207894426	27.334029108497308	55.818590316391735	105	0.00980997673684431
25.058218689729898	28.59505011417076	53.65326880390066	60	0.01513167725570446
27.045844589770756	26.437455421740435	53.48330001151119	54	0.018824169617534116
27.29831596524067	21.877883725073197	49.176199690313865	108	0.010819324605272391
28.781582004863953	25.8317819401765	54.613363945040454	99	0.010910170259724504
23.00178484182075	24.27482230847579	47.27660715029654	84	0.011448401996578372
25.14011264198993	24.719251041512727	49.85936368350266	81	0.012496659736654042
29.03984302957467	21.1157958746713	50.15563890424597	87	0.01434585384735752
27.651641249059686	29.563678411609402	57.21531966066909	99	0.009621976780443619
21.758587586250094	26.925088897895186	48.68367648414528	78	0.010954961708123424
26.159185141311934	25.105645667480143	51.26483080879208	84	0.012261400058699
42.51953643715818	21.293785099434118	63.8133215365923	111	0.014265091973657003
37.37054585955709	22.175115624139565	59.545661483696655	87	0.01637993988194208
24.914004872314052	21.021365977542196	45.93537084985625	96	0.01174738600766188
33.23002038409629	21.068766041264706	54.298786425361	120	0.011381784446647662
29.156986754740515	27.79193903645254	56.948925791193055	108	0.009583353098116193
31.155197250625715	24.63335252255504	55.788549773180755	108	0.01091996353171647
32.61004439855922	24.17509152375535	56.785135922314566	96	0.012833249871996322
26.642665504929376	27.84748146448868	54.490146969418056	87	0.011131592258333352
28.39354628783874	27.18741648849052	55.58096277632926	81	0.012736441492101028
30.204279316720875	28.339209752923143	58.54348906964402	72	0.014537627792665032
34.084374837827966	27.98967578319336	62.07405062102133	96	0.01196974495762396
22.2235303297816	27.576477019208223	49.80000734898982	69	0.012358083990594296
30.39188797573877	27.751710568925134	58.1435985446639	84	0.012702900762529617
27.94473726635067	28.50228611846817	56.44702338481884	87	0.011331262822420335
25.39639980378261	24.079649556068052	49.47604935985066	84	0.012368046552668814
32.40635735550509	24.311227630662103	56.71758498616719	129	0.009474212079694051
28.29866694312341	26.0125310999487	54.31119804307211	102	0.010412185323600382
25.45516200416963	26.82147393936053	52.27663594353016	93	0.010352449293761955
43.41232828384522	23.08443405987972	66.49676234372494	99	0.015417815509784712
30.626701747201444	35.643325210436096	66.27002695763754	90	0.009941384136842682
29.389560415897755	37.1923924697416	66.58195288563935	81	0.010371896681129708
17.958313443487953	38.75122670720674	56.70954015069469	54	0.010173138458235923
24.287524114067438	43.92008307123477	68.20760718530221	54	0.011760219791161455
41.92531622940653	33.98436869444873	75.90968492385527	108	0.010735302225215383
27.998827112511343	31.747325487815125	59.74615260032647	75	0.012162810047834599
46.657853834515564	31.65796623031285	78.31582006482842	138	0.009469095575449173
33.00279217202293	30.287651633781948	63.29044380580488	111	0.00957890055649999
19.64918215957517	38.715619677427114	58.36480183700228	51	0.01161142840776035
26.00183598552755	35.525190557776895	61.527026543304444	60	0.013206298067148117
24.987021787948606	31.29289141716915	56.27991320511776	60	0.014113085600216882
25.091351601752194	33.0351625012321	58.126514102984295	63	0.012939586509482277
31.95070640108336	40.51278031114682	72.46348671223018	63	0.013315509962751338
20.05518098276007	39.232254877555334	59.287435860315405	42	0.014183003469158899
27.49069121195417	25.857722676547084	53.348413888501256	81	0.012899384666072726
23.83073788913093	29.382728389778443	53.21346627890937	69	0.012417724871648184
27.316745040454443	26.469601057435504	53.78634609788995	72	0.014206993522802337
29.837106227295447	29.375756955092843	59.21286318238829	72	0.014045619278606468
24.791250596370062	37.571547681357416	62.36279827772748	69	0.010594856790855076
20.117978324009727	29.975607217907324	50.09358554191705	51	0.014526213728944288
33.93960214698035	23.87640517544485	57.8160073224252	114	0.011191959130854133
31.720571390561627	22.86569748507988	54.58626887564151	114	0.01101186983388553
31.772553443438422	27.68213346622679	59.45468690966521	81	0.013615251956359665
22.990147955575857	25.455761539325835	48.44590949490169	72	0.012894203213851058
25.723364575035745	32.32498962127373	58.048354196309475	78	0.010828272527453338
22.096737737252607	28.672456159278592	50.7691938965312	75	0.010990504779040837
28.05343593975733	24.97354117308516	53.02697711284249	114	0.009529176334258291
31.21878849937763	25.390163383815775	56.608951883193406	138	0.008382322708005902
47.83965596381732	28.669699101544115	76.50935506536143	129	0.01097759223927963
52.7073374535335	25.7707186222983	78.4780560758318	150	0.010710376922606828
29.741747307186976	30.313221862801292	60.05496916998827	90	0.010959293629166266
47.22291311724796	36.17981574017846	83.40272885742642	126	0.0095627740281885
29.0475336547045	36.0167875152006	65.0643211699051	84	0.01015710873026486
28.905371554887928	39.170057298778865	68.07542885366679	54	0.0147663505023222
20.769775459316186	39.96062724199669	60.730402701312876	45	0.013418660158047437
30.711360146199823	34.890383667411655	65.60174381361148	72	0.012651454205395849
34.34314736622032	28.97922719909702	63.32237456531735	72	0.0156624477019964
36.45202232784574	31.20216960382218	67.65419193166792	117	0.009543016918359957
25.028121035106153	41.35941990050655	66.3875409356127	66	0.010343887319444156
27.386739499555752	42.99234917653745	70.3790886760932	57	0.012474857705639157
40.13436715007996	32.105594264676945	72.2399614147569	90	0.012999693549418514
34.471826147847366	33.46427040887872	67.93609655672608	75	0.013620756879554526
30.77510795786008	33.77340676847144	64.54851472633152	72	0.01297911369405422
30.79326529074973	32.93566293413611	63.72892822488584	75	0.012697304118804563
25.84591278135944	27.041652222889805	52.88756500424925	84	0.011520776809523717
29.541500423997157	28.703167729492023	58.24466815348918	108	0.009452926151646104
34.88075655693355	21.030823246300354	55.911579803233906	120	0.011755348202807603
28.358501855020354	24.29694889461535	52.655450749635705	102	0.010939291421964967
22.11369698651295	26.94073300065933	49.05442998717228	63	0.013723719438159617
19.247236508481112	23.80932376827808	43.05656027675919	78	0.010957774661337974
20.91288044090351	26.675891490936348	47.58877193183986	75	0.01113446318984965
42.743961428218704	28.145090123839033	70.88905155205774	123	0.01083479317057468
27.23091848878965	23.11016373931994	50.34108222810959	102	0.011011850492039493
25.16014410408167	23.28974231821857	48.44988642230024	90	0.011742206735864135
22.295026166302634	19.555426811121983	41.85045297742462	90	0.012196380154668902
22.05017206024391	23.301413408893595	45.351585469137504	81	0.011860932339822912
25.86858597765972	22.260618666052935	48.129204643712654	75	0.01483225191707292
28.573867015834384	24.263713348534576	52.83758036436896	72	0.015593945032981277
25.514111268205404	22.531662958394122	48.04577422659953	84	0.013005425606333124
28.3755085759021	23.03270078498746	51.40820936088956	90	0.012870168574602894
31.534001390730637	24.327660597347347	55.861661988077984	99	0.012113746494641132
38.545092106583944	26.197844623869806	64.74293673045375	150	0.008701831238170747
34.07269152511064	17.927693223778967	52.00038474888961	99	0.015518509401681875
33.80367900230232	23.911996120045306	57.71567512234762	108	0.011770635450468338
27.70642685092492	23.948819028745426	51.655245879670346	93	0.011924304894468395
30.672568249647497	25.52580731730191	56.19837556694941	96	0.011860123320920233
28.942713128895694	27.27185264909635	56.21456577799204	84	0.012422991505768002
21.441059459738433	31.923243345768284	53.36430280550672	111	0.006678087950809239
19.455516966736702	34.08396574711986	53.539482713856565	60	0.010858499897865486
35.34699821988919	26.823171155575313	62.1701693754645	114	0.01063809386082952
29.038440145318283	26.799724194237513	55.838164339555796	90	0.011767037341853123
48.35970698438257	28.480193563978094	76.83990054836066	147	0.009740793879156951
36.440748032244244	24.720639351563413	61.16138738380766	129	0.010131047107706905
23.734944387888053	27.655056404843453	51.390000792731506	66	0.013544611967295547
21.383336748367384	32.02978203690119	53.41311878526857	69	0.010692465867886441
33.507245317644504	29.91642258829706	63.423667905941564	87	0.012460731560311656
28.305361363203808	32.04776220650397	60.353123569707776	75	0.0121760642386647
34.34948840137976	27.220453744179217	61.569942145558976	108	0.01090310275233726
16.12002057963499	41.094785359394514	57.2148059390295	51	0.009361435207587086
22.302512198875267	31.63169125466037	53.93420345353564	75	0.010264397099755579
22.22099047900207	32.10033949692162	54.32132997592369	63	0.012046511852235826
30.023776572093023	29.20866118924128	59.2324377613343	102	0.009999914024605155
24.915718834212594	28.996977229868495	53.91269606408109	90	0.009941361581060295
32.643913411296296	30.319379540287176	62.963292951583476	78	0.013516291856412914
26.34627679812531	23.842938752556385	50.189215550681695	90	0.011931281462032461
25.96980843854816	27.636116470583477	53.60592490913164	72	0.013275521796121941
29.205969479009912	25.526954146097157	54.73292362510707	78	0.014107532243571409
33.98186861946386	33.74477107689558	67.72663969635944	96	0.010469369277583618
29.55352853004406	27.363988167785518	56.917516697829576	99	0.010672668761322
28.37649620516678	24.013572834568144	52.390069039734925	96	0.011723367643423594
28.9627565767507	27.084892298227558	56.04764887497826	90	0.011657394457011869
27.607870807368386	25.730901422191657	53.33877222956004	81	0.01298373601724636
25.507093304135566	30.82853432584686	56.335627629982426	66	0.013178504469730658
26.90863953252806	29.846700317766018	56.75533985029408	81	0.01144672458342172
26.72052814110957	35.377354770598885	62.09788291170845	63	0.012884411185834737
18.335851720586767	33.56787223745493	51.903723958041695	48	0.013099103331969597
27.68791519901159	25.407571973269185	53.09548717228078	87	0.012222192315633392
30.564047291252564	22.478317318707703	53.042364609960266	84	0.014745369635102238
26.313143753145816	30.81864923531281	57.13179298845863	72	0.01236791911908706
21.846882783345357	29.789669036766043	51.6365518201114	75	0.010581074245324645
31.048190436767438	25.854390010844494	56.90258044761193	78	0.014590830906936718
25.791193737574687	27.477057053247528	53.268250790822215	87	0.010977567989860184
24.855284360844465	28.38648247627669	53.241766837121155	84	0.010801837621328086
41.95536409397737	24.93864294726165	66.89400704123902	120	0.0118624500427721
23.472839435413675	24.86489479430272	48.337734229716396	84	0.011417137180992212
28.777227637807833	27.19568521119632	55.97291284900415	102	0.010209324041278873
25.93737968527992	25.182921190280744	51.120300875560666	108	0.009457876701281691
30.90155699126926	26.44079436456019	57.34235135582945	93	0.012008984341233944
27.39516533645873	33.01633981613652	60.411505152595254	57	0.015291984903396404
37.493293286742585	28.88776427823295	66.38105756497554	105	0.011431552962378522
30.584607895866828	28.031290809309706	58.615898705176534	93	0.011443589755647313
27.687860311575882	24.958574009555647	52.64643432113153	105	0.010255241079869741
32.0836002669932	22.928656462352418	55.012256729345616	111	0.011374786182572016
39.23734429458155	28.69472304186107	67.93206733644261	111	0.011200966754886688
28.58734523124351	25.778158783537492	54.365504014781	105	0.010252783819607
33.571211788139706	24.817195552846837	58.38840734098654	123	0.010035299717259138
45.49371535526663	24.4451837517905	69.93889910705713	147	0.010316631544884153
31.35878634082301	27.749882111823133	59.10866845264614	81	0.013467754057381506
23.96423950370836	28.7846817533211	52.74892125702946	63	0.013870481404935736
31.709985276772105	28.19650729958047	59.906492576352576	120	0.009059965846004174
28.554130800996578	23.975185055776475	52.52931585677305	126	0.008980800349115699
24.7646043864318	31.392483364466713	56.15708775089851	69	0.012160129858200048
20.742934759917784	25.982498252089872	46.725433012007656	81	0.010452689866619859
24.197709383813223	31.548795805285142	55.746505189098364	66	0.012443885213119534
24.224651028778094	30.226934337561143	54.45158536633924	75	0.011321858504277417
26.927404237719347	23.473314994462864	50.40071923218221	105	0.010499264020714303
26.48780386136005	30.0725589830909	56.56036284445095	84	0.010849330214593266
28.937722149883744	26.481581044934646	55.41930319481839	93	0.011455906588080066
30.902885755655937	25.906837844675188	56.809723600331125	105	0.010788618581012467
28.47247540395166	24.76621860149093	53.23869400544259	99	0.011152541128181799
25.892154149423444	22.30850005515646	48.200654204579905	87	0.012775393246948978
26.087391121626776	22.6869075511005	48.77429867272728	87	0.012692657006341066
29.464818183725782	23.84226775976458	53.307085943490364	96	0.012091727648302773
25.92997482912051	24.634066460124792	50.5640412892453	84	0.012350678267205683
27.944327173581488	23.74027192319009	51.68459909677158	87	0.01290112635093386
34.31829306693588	23.090801516935826	57.409094583871706	96	0.013687094275876527
22.17353160988454	25.744438164682407	47.91796977456695	78	0.011491102544509885
21.898629411574028	22.93590736167559	44.83453677324962	84	0.0115119346352643
34.39841317123399	29.41274464995835	63.81115782119234	117	0.009550147826068415
23.02192721288148	25.240011720131136	48.261938933012615	78	0.011989401244186501
33.20004455528808	24.16656966413909	57.36661421942717	114	0.01094033920176494
27.985716025011385	21.633878688323733	49.61959471333512	108	0.011089051903348983
28.542697675777642	23.133583501599194	51.676281177376836	105	0.011042985603274765
27.525928550414353	23.81598787667453	51.34191642708888	111	0.009983844646344555
33.08885926880926	31.711774712932733	64.800633981742	108	0.009546197309487763
34.38786010515106	28.771836705839654	63.15969681099072	93	0.012197278758284564
24.727468200230867	25.870132922675644	50.59760112290651	84	0.011521208575885815
27.878050857834197	32.906392320733126	60.78444317856732	63	0.014052924920486995
29.482608644208224	28.944434981288918	58.42704362549714	81	0.012510497497861258
30.237402457979453	31.737211166063144	61.9746136240426	78	0.01237823091938443
34.20027079585854	31.074448410050874	65.27471920590942	78	0.0137281482520526
36.72797915335125	28.69779140342792	65.42577055677917	87	0.013665739082616982
29.36121407165682	28.833452356658146	58.19466642831497	72	0.014071435389004568
29.338090304125355	28.395121535210034	57.73321183933539	96	0.010664150015649602
26.342328803738017	29.729203664710273	56.07153246844829	87	0.01052169747994065
31.953779700990367	35.07492541611593	67.0287051171063	78	0.011978705481680375
29.790137582592198	27.479272747464417	57.269410330056616	78	0.013582319563082776
33.001093154940186	37.16795410585963	70.16904726079981	66	0.013890537819835286
28.089536517431227	27.87331060240595	55.96284711983718	69	0.014573695588500158
30.045510768819096	24.115375687936403	54.1608864567555	105	0.011117124439536214
31.94843947494332	29.304797478215143	61.25323695315846	96	0.011079679363247146
36.29441493161543	29.608223255924422	65.90263818753985	114	0.01012577456643106
28.764393090435725	23.954741984478098	52.71913507491382	96	0.011854327363852396
35.60762711660893	36.65799227113623	72.26561938774516	60	0.016319694509528845
24.637768157100883	25.103706821927428	49.74147497902831	90	0.010961654217043574
27.68858437232684	26.165545773546707	53.85413014587355	90	0.011570984883853457
27.716946685390976	25.493663902401753	53.21061058779273	96	0.01105807529895921
33.80878077211712	33.827833455850964	67.63661422796808	93	0.010748318943843767
26.813377877834338	29.59489881252595	56.40827669036029	81	0.011488374546266122
29.359550022022248	22.901694504908413	52.26124452693066	99	0.01202310235328071
29.592783655368198	25.30885007827163	54.90163373363983	90	0.012413412461535954
42.013575534871485	30.13382906578412	72.1474046006556	114	0.01104880255119191
44.24737582086099	24.571745121863195	68.81912094272418	126	0.01179213603429653
28.783306585126315	31.820533200232884	60.6038397853592	93	0.009994098856183884
36.328428512472385	31.401398932012018	67.7298274444844	102	0.010872181251025842
24.614970515247954	32.00748081840015	56.6224513336481	84	0.009797203286534537
29.62578799587537	37.97346155511711	67.59924955099248	78	0.010666868122897922
29.78355553567658	26.761303255171743	56.54485879084832	81	0.013324042971089774
31.7713535094717	30.004438230965313	61.775791740437015	84	0.012403162821845668
23.453873493222133	27.188276827090085	50.64215032031222	66	0.013596271926367746
26.31232790203064	29.164836758154394	55.47716466018503	81	0.011452642677181565
22.469094999086927	25.406959196138573	47.8760541952255	72	0.01269556300142714
26.391663106761545	26.880150260257455	53.271813367019	72	0.013705988723733001
31.08879693355986	22.246588144278395	53.335385077838254	105	0.012014370527371017
27.100999192419895	24.925843177730226	52.02684237015012	102	0.010407978836431065
25.55546410913253	27.180836236139015	52.736300345271545	84	0.011383410974924785
37.09251029717379	25.251662460933073	62.34417275810686	120	0.010865636228256266
31.90713008753845	25.19080863303247	57.09793872057092	126	0.009369374843974019
42.494379094765456	26.631855342273234	69.12623443703869	96	0.01433417082893931
36.922531585804705	27.735448574147483	64.65798015995219	108	0.01130645723370904
32.225221229690774	23.345953893655693	55.57117512334647	114	0.01097512466047309
23.595894620293436	30.756826539152605	54.35272115944604	72	0.01140896680962345
28.270499967164504	34.706918279555204	62.97741824671971	114	0.007540450398697793
24.528408474674773	26.29467980590596	50.823088280580734	108	0.00880289921149744
23.26373994499255	29.118824662905084	52.382564607897635	75	0.01129512760103732
21.677068022083823	24.940762094631573	46.617830116715396	81	0.011140448209149244
28.068707747553994	23.942419716373074	52.01112746392707	81	0.013817917875696556
34.98155036273427	24.74984390824604	59.7313942709803	81	0.015692221871573497
38.47150851125692	23.710222127264203	62.181730638521124	102	0.013637074427393613
32.175981816498435	25.05360284265551	57.22958465915395	84	0.014187417273841004
32.56923309199699	28.683618349009105	61.252851441006094	96	0.01140156228101029
25.30973684406869	31.680819356418926	56.99055620048762	72	0.011765461453442216
30.075831176205014	26.040635684762165	56.11646686096718	87	0.012731718524236326
47.15824356026194	30.35887236323261	77.51711592349454	132	0.0102454294727288
24.041739423297084	31.680825232413167	55.72256465571025	123	0.006623184914226674
34.478763158391246	24.932109882295276	59.410873040686525	144	0.00869945842248464
37.77105963511936	25.5852420236579	63.35630165877726	102	0.012825257273040585
23.958471567188813	28.239582361053923	52.198053928242736	69	0.012844598087285953
24.184694745345766	28.575650634249357	52.76034537959512	120	0.007372230512399856
26.220964996697276	22.336536478475203	48.55750147517248	141	0.007945309872168274
33.09422180453275	29.57900251072616	62.67322431525891	87	0.012451446151291446
31.93685064728247	27.458300565800492	59.39515121308296	84	0.013251224072899671
21.61915844722114	31.42428264469099	53.04344109191213	48	0.015735303322372617
30.606828058683362	33.635992675508575	64.24282073419194	72	0.012965686155061407
28.652917194657544	28.107173240090642	56.760090434748186	75	0.013519180265974295
25.911087571686643	23.770667913772833	49.681755485459476	75	0.014180449473254664
26.961700786165054	25.296922247070242	52.258623033235295	81	0.012922311623808434
26.92656016012488	23.48005827766636	50.40661843779124	78	0.014130476720335119
26.34106595484646	25.716414525893224	52.057480480739684	69	0.014745159097481305
28.63403142731892	23.717768117736956	52.351799545055876	75	0.015230278308116704
26.36349946618176	22.137459749018223	48.500959215199984	84	0.013470519003353746
34.23907308013685	26.306620403790703	60.54569348392755	81	0.0148468941829138
23.800604095759514	25.027721184882925	48.82832528064244	72	0.013391546664650708
32.24076677799188	25.78674256401344	58.02750934200532	90	0.013001194072132119
25.785300213016882	24.990416150895015	50.7757163639119	87	0.011755905319426668
25.912255216118627	22.847958802295278	48.760214018413905	78	0.014021015065739894
27.01046816120995	25.10531659097868	52.11578475218863	87	0.012111810135548405
25.582797162445043	26.954596312666308	52.53739347511135	96	0.010029305448529499
26.505027160228902	24.591413795900447	51.09644095612935	99	0.010657253798201633
32.40995135239149	25.448774674325893	57.85872602671738	90	0.013165981814401815
27.66757387782991	24.658462830562094	52.326036708392	84	0.012921977653590464
40.47065766709619	25.791903279338907	66.2625609464351	156	0.00872612643348644
25.451874397964094	23.583490146786627	49.03536454475072	114	0.009263555817326772
27.603329247224423	22.87360359908392	50.476932846308344	102	0.011195495864865089
23.936173089553495	25.840716823542305	49.7768899130958	93	0.010170215072140214
31.476850712690936	24.94510313386125	56.421953846552185	99	0.011893939313779283
30.509691256543423	21.27457861963715	51.78426987618057	111	0.011562012347677434
24.32941284004425	33.97715014580405	58.3065629858483	63	0.012366562406790288
18.085323534505918	32.33156685442299	50.416890388928906	51	0.012567915947335221
24.975673502833562	24.483691713814114	49.459365216647676	84	0.012076459713942427
25.40149483855336	23.80909788206292	49.21059272061628	84	0.012469713509033116
23.917616890937467	29.777496958749623	53.69511384968709	84	0.010125813369215737
25.645577289442603	25.72747776879466	51.37305505823726	93	0.010727976809751872
23.809097405477537	25.81962798088501	49.62872538636255	81	0.011638360351975985
28.390244457039106	22.512480960245636	50.90272541728474	84	0.01401211722258148
37.76294773812399	26.226676870940963	63.989624609064954	135	0.009531873960959475
25.250553044425683	22.400440517999524	47.65099356242521	114	0.009552449050954108
26.641722865974206	24.304746888933234	50.94646975490744	90	0.011863823010796878
25.15746227042303	23.85522374337152	49.01268601379455	90	0.011542777715053472
26.370523660146123	26.500557637665022	52.871081297811145	81	0.012301927340042223
27.99948568353461	23.624509643086107	51.623995326620715	84	0.013425683515807911
23.317367449438507	24.397489560138638	47.714857009577145	81	0.011946985721234357
31.33006638355262	35.29718849148671	66.62725487503933	69	0.013283466379413128
25.842327493900335	26.16808215671852	52.010409650618854	72	0.013763780654350367
30.824733351532537	32.040453368250276	62.86518671978281	75	0.012964889938607437
22.283588361533486	28.91125166899236	51.194840030525846	66	0.012490414207243427
28.194236194270353	25.191884339135257	53.38612053340561	84	0.01289887709564496
31.464897398434836	24.34191573305897	55.806813131493804	96	0.01246873488596406
39.49016663265154	28.914475279504824	68.40464191215636	111	0.011191912683378075
25.992173127535125	24.489146486755295	50.48131961429042	99	0.010541486170246393
24.487659827050514	31.81530781335904	56.302967640409555	84	0.009803451032631466
31.96267158224635	35.13821755715329	67.10088913939964	96	0.009721779929445505
36.622253357429955	28.20340283479055	64.8256561922205	117	0.01026235611630733
33.7042115570069	25.163090840160248	58.86730239716715	114	0.010755766445697961
24.939884695469765	33.083613257335344	58.02349795280511	81	0.010006425466659674
27.4208978490381	31.329597611707356	58.750495460745455	81	0.011198454051157157
23.060426072054526	34.81643356876779	57.87685964082232	60	0.012220303610926977
45.28670776168671	27.325304328240037	72.61201208992675	114	0.012368163746489426
32.105811121825575	28.131690842036797	60.23750196386237	84	0.013076972324226143
26.37909939724205	34.17527525067648	60.55437464791853	81	0.01018862013908289
42.86081389541026	27.051416676685665	69.91223057209592	153	0.008953207292227495
28.547700963726594	30.864351529625974	59.41205249335257	87	0.010859932754606802
30.23649763417558	28.25381707188996	58.49031470606554	93	0.011287655523209638
20.46587920925016	36.18497448400973	56.65085369325989	42	0.015397784343912957
35.15286082461285	28.9807756265919	64.13363645120475	90	0.012733166722314209
28.662112934178253	26.314830678808427	54.97694361298668	87	0.012217822896518177
37.579079817344606	24.97351710972931	62.55259692707392	111	0.011933970855260578
24.569561329486845	30.87672226840332	55.446283597890165	78	0.010827835297095162
38.80248008181596	30.30902617097316	69.11150625278911	93	0.012786864766546344
29.45789018992771	23.696622738259123	53.15451292818683	93	0.012532373387482436
25.826784359853875	32.33596559524983	58.162749955103706	69	0.012274721596510352
22.792752469058325	31.752709310686985	54.54546177974531	57	0.0136943767146252
32.863002210035404	25.753430092918993	58.6164323029544	99	0.011985258218043773
35.063891910787504	27.168350068350843	62.232241979138344	90	0.01328594742480236
44.29444264283425	25.47274139754331	69.76718404037756	129	0.011268173429568588
37.48901374181699	29.510183023476305	66.99919676529329	99	0.011948797284325446
34.42333983767192	31.639477654679098	66.06281749235102	78	0.013616829715987868
50.07510977934948	34.6420747093946	84.71718448874408	99	0.013031609169506575
48.27363934447942	30.49788371843562	78.77152306291504	99	0.01382792964469434
24.22016245342902	33.49985587023262	57.72001832366164	69	0.01137560680131319
27.64485345115883	33.500453160723936	61.145306611882766	66	0.013152441722011556
27.348039125732672	28.490602546697165	55.83864167242984	78	0.012445868122690744
22.588738216918	30.835543705439253	53.42428192235725	66	0.012013656468898194
28.8436532773621	29.25276795850983	58.09642123587193	90	0.010998623930489438
30.670454685943714	26.359067997495718	57.02952268343943	93	0.011972146208667121
28.35292440620129	45.201057364024074	73.55398177022536	54	0.013008276318573963
21.166895612031944	31.065040286157398	52.23193589818934	126	0.005949525800074419
33.452637535975825	25.30080756571886	58.75344510169468	132	0.0092082576852424
25.425687799958062	29.839166266309036	55.2648540662671	90	0.009879500641244302
30.86113971974392	24.56008753950322	55.42122725924714	114	0.010299324171926
23.164770724696034	27.492693273734346	50.65746399843038	75	0.011756354801802787
31.694081968546858	25.91088216825276	57.604964136799616	99	0.01164277785144476
26.506923888397687	30.94041225747206	57.44733614586975	87	0.010261466395315364
29.202320798916944	23.100141465306876	52.30246226422382	108	0.010916455367361645
30.067120677283487	25.779538740696605	55.84665941798009	114	0.009782846797962822
29.047259877073436	26.101019005499417	55.14827888257285	84	0.012847734877101252
22.871652289455493	25.044229911659546	47.91588220111504	87	0.010758915866159539
27.798286750698413	29.806080683140298	57.60436743383871	93	0.010221199091029715
37.27822537615471	26.79985380213077	64.07807917828548	117	0.010748767275460334
28.693152288540357	27.188188791946043	55.8813410804864	78	0.013325469206497239
28.889461595712522	23.861540370282572	52.751001965995094	81	0.014129769363862371
26.677571999919532	27.9173120388222	54.59488403874173	78	0.012405201596661537
38.86191214430906	34.47851219196015	73.34042433626921	201	0.005417468121014424
27.851847640130558	23.38884341602725	51.24069105615781	138	0.008199053701756786
24.863289612364266	25.055137047758496	49.91842666012276	102	0.009749667006171324
42.32426599883543	27.98395962409313	70.30822562292856	102	0.01303032718288547
19.753165716036204	31.905661239797684	51.65882695583389	57	0.01219653420764284
18.855887675149628	30.83802444031883	49.69391211546846	60	0.011472646263474875
27.22682936652691	26.852044427455578	54.07887379398249	96	0.01052117888481191
30.968496517054962	23.242780199629795	54.21127671668476	114	0.010717634525930985
23.500191942383157	26.071863934176402	49.57205587655956	81	0.01144485634865899
29.019524583982395	25.78199423382123	54.801518817803625	96	0.011331791849816806
32.24557744442272	24.81949498141984	57.06507242584256	96	0.01251181490878193
28.92445291961576	26.7110338656846	55.63548678530036	102	0.01037813308003284
22.347634503113085	40.31318607295031	62.660820576063394	108	0.00589177642991088
22.1634819019884	30.059519907667816	52.22300180965622	117	0.006810798456609826
31.670984145462512	26.314848865718623	57.985833011181136	93	0.0122561651372134
32.973841970462445	24.09709537383692	57.07093734429937	99	0.012564616177607608
33.29789056323523	24.935194198056703	58.233084761291934	87	0.014065006957155136
25.23797929559334	31.279123512785347	56.51710280837869	66	0.012931627652477998
19.02400866763398	35.76293327593778	54.78694194357176	72	0.0085467639915847
24.324997343074056	27.25664685264586	51.58164419571992	87	0.010577582410866539
29.528258791702285	22.630062052678056	52.15832084438034	165	0.007300950814895445
32.78019037807688	26.892500545576073	59.67269092365296	162	0.007097944004481674
28.151212968371063	27.63402046388621	55.78523343225727	78	0.012992792448726115
22.61703126693967	31.03598836575174	53.65301963269141	87	0.00907721010134269
29.259058117506783	24.33696932952838	53.59602744703516	87	0.013091684488743096
18.4848872961736	25.087848511188053	43.57273580736165	69	0.01154256443002469
20.04493884724107	24.203301245895915	44.248240093136985	66	0.013188124785275297
25.62024570817412	20.671370180469207	46.29161588864333	90	0.012923521153101114
28.319439150537537	20.530770676832997	48.850209827370534	90	0.013895299724505681
27.25473657067371	30.17930553366107	57.43404210433478	96	0.009670275954960653
23.701457766417658	19.565016009314764	43.26647377573242	78	0.014679144294116188
27.874432413582195	23.068465626492074	50.94289804007427	93	0.012289881570439764
25.19297708749894	24.718089200293214	49.91106628779215	72	0.014080451439740104
27.517987771748153	34.59671434959344	62.114702121341594	66	0.012792420503390719
24.76289617315752	26.9659099751647	51.72880614832222	66	0.014239866316939924
23.870660911147922	31.7964912913515	55.66715220249942	57	0.014174714137561733
16.839889994587903	31.26589138336399	48.10578137795189	51	0.012188639990591785
23.36286527243854	40.29802256248016	63.660887834918704	54	0.012216633896984554
34.902205379909184	23.515939114395593	58.41814449430478	99	0.013260379672795935
30.34820989868965	22.196971673658037	52.54518157234769	126	0.009866631830408238
23.885968723570212	23.257548307622333	47.143517031192545	105	0.009708193983003257
26.722681173057236	28.257546624372456	54.98022779742969	90	0.01066974078699524
29.29474249719421	31.61266752430537	60.90741002149958	87	0.01087488483394573
56.099613979025094	24.737591453532193	80.83720543255728	144	0.011863294495233585
38.09129265998338	25.77868530739458	63.86997796737796	114	0.011482098803257833
29.36774067304934	22.94270181332702	52.31044248637636	135	0.008807879077102655
27.37305286748627	19.770181241718735	47.143234109205004	141	0.008891664088527209
20.1874079961721	25.875892356985627	46.06330035315773	78	0.010666784167319686
25.427816955858052	26.31823958964937	51.74605654550742	102	0.009562607164740364
34.772215387433306	22.658873907873247	57.43108929530655	165	0.00813185309786346
35.526230624433	21.743872503724436	57.27010312815744	135	0.010349431847740476
54.43593465109484	23.400335874051112	77.83627052514595	159	0.010905115399080696
42.342328426316946	23.204509202944486	65.54683762926143	144	0.01040361801682275
36.534256103600384	21.76015703749792	58.2944131410983	105	0.013539701484689933
19.70180161079379	28.370409418332148	48.07221102912594	57	0.013347652449938519
27.1632052551073	29.8477710856707	57.010976340778	63	0.014819309648037496
44.72527436789474	29.91458135828638	74.63985572618112	141	0.00935530017250385
29.901255118543318	25.166764428776723	55.06801954732004	120	0.009414124805938739
24.435642319462545	40.11565166165731	64.55129398111985	42	0.01634001862756187
29.295306468521993	24.192623965553373	53.487930434075366	96	0.011923397179200736
36.0201763055667	21.825469869502513	57.84564617506921	111	0.012668429404782331
28.89048773701443	27.85104366070802	56.74153139772245	72	0.014259356908796173
33.670446680227855	26.359759372268496	60.03020605249635	99	0.011993448680577452
31.51606754526997	27.035263800842266	58.551331346112235	87	0.012814477487736727
24.83189684093184	25.78893626039514	50.62083310132698	78	0.012474089549325959
23.42846888796462	30.908668469816988	54.33713735778161	66	0.012332228138578375
24.782954963296728	28.337627280160678	53.120582243457406	84	0.010792285641834772
28.934548488393947	24.13929672103639	53.07384520943034	96	0.011839764907275108
34.66261509328768	39.856858422438	74.51947351572568	78	0.011574224132433438
21.04380536131984	33.1810700009034	54.22487536222324	69	0.010269484372604562
30.871336070451033	25.788313849959362	56.659649920410395	96	0.011829210845826032
26.840603819952864	25.730132882707746	52.57073670266061	102	0.010105892592872636
29.44142048683222	38.57880034278502	68.02022082961724	81	0.010100684051486605
30.48420779017448	30.78572285415951	61.26993064433399	90	0.011032419717192328
24.8500467432432	30.955006179459634	55.805052922702835	96	0.008856489696978671
35.7229558944761	23.448210825475467	59.171166719951565	120	0.011128470811514257
55.66223080813597	27.26210080819986	82.92433161633583	369	0.0043493190750330995
27.613566233866873	31.998811716275615	59.61237795014249	162	0.005540701188817864
45.961238966716294	23.700230398433927	69.66146936515023	150	0.010369732131848995
25.268956323449885	31.36301548863237	56.631971812082256	69	0.012355833104523253
24.603359115812843	31.64165936109771	56.24501847691055	63	0.013173016904436854
24.91364483465497	26.308383523125766	51.22202835778074	72	0.013350580231910074
29.287985175785344	27.738502395624685	57.02648757141003	72	0.014440864959778197
30.16200609546491	26.536056210854284	56.698062306319194	90	0.012170505085314694
22.52736350713101	27.337743541737712	49.86510704886872	63	0.013764071103869477
40.34840843065872	22.84621904398828	63.194627474647	108	0.013591171177978114
27.080264916511798	31.69358516051228	58.77385007702408	72	0.012374771412702412
25.423828220671936	23.53649974288782	48.960327963559756	87	0.012146131468165542
15.201679500842047	43.20153278481591	58.40321228565796	54	0.008054911523629893
19.4896057443812	38.81114788641882	58.300753630800024	66	0.00889459741663653
45.139112184030864	29.847589794038427	74.98670197806929	123	0.010805043374969913
26.059376804243406	28.109909092216903	54.16928589646031	87	0.010878118208314445
23.679721549886974	28.834217804830526	52.5139393547175	75	0.011532247168217416
21.864194346472765	24.760665993954888	46.62486034042765	75	0.012173990457750014
24.2078586346738	29.023459511564877	53.23131814623868	66	0.013258421165291629
22.69545335612946	26.32670770297163	49.02216105910109	60	0.01494844947539404
23.96547967045374	24.501980235134546	48.467459905588285	66	0.014910880662093751
27.276519506645915	26.43945755455614	53.715977061202054	78	0.013111008760140366
21.419670744678893	24.856164040252306	46.2758347849312	69	0.01299500504047811
25.37156617829148	23.00880791677509	48.38037409506657	78	0.013746611348113334
22.759824216595987	21.818435012550125	44.57825922914611	78	0.013215290470449814
32.21143007217697	25.418605726668677	57.63003579884565	120	0.009841133489818993
32.27839567233035	24.53147069254661	56.80986636487696	96	0.012619872723205881
22.832103979939678	21.31024366118223	44.14234764112191	78	0.013469439360736326
38.363425543890585	21.92597656022424	60.28940210411483	123	0.01186392944601067
31.98778935288606	26.349356816207298	58.33714616909336	111	0.010330153743659946
28.441183716234132	24.959018243124948	53.40020195935908	93	0.011798752805703708
28.459904200783757	21.338706855275493	49.79861105605925	96	0.012735757855527474
37.016727886017776	20.36224005400079	57.37896794001856	111	0.013465096735741153
27.84754809445231	20.73531553895742	48.58286363340973	93	0.013208145463295936
27.166063366124455	27.34854251396505	54.514605880089505	75	0.013269051569000729
24.108378074940926	23.702809450102198	47.811187525043124	84	0.01205107345573698
27.94331117041031	32.224734351860754	60.168045522271065	114	0.007902009016731529
23.24382641769375	26.7936013124006	50.03742773009435	126	0.007151739054675313
30.89056448309724	27.490724698266387	58.38128918136363	93	0.011683453009547673
30.758587015778954	24.543362025819395	55.30194904159835	102	0.011490170978368538
35.321762070670786	23.57741244384121	58.899174514512	117	0.011289248028215688
23.604136201335916	22.498463275029554	46.10259947636547	78	0.013269508142457382
25.057007666837663	23.652886710518516	48.70989437735618	84	0.01240712603786654
29.21615819427666	23.264182615511096	52.480340809787755	114	0.010295320963692362
38.70668031553238	24.131653495467802	62.83833381100018	159	0.00868376198300685
58.947948045306426	31.900305635774266	90.84825368108069	180	0.008388269645752348
46.080717939318944	33.812062977050246	79.89278091636919	147	0.00843895990126252
26.809539794355665	25.43526189259424	52.244801686949906	90	0.01153841720573135
31.541176984281662	27.59686943827537	59.13804642255703	84	0.013090261519104975
30.329424885237287	40.901960730745685	71.23138561598297	72	0.01111587570222628
36.52849099395262	36.257476876922475	72.7859678708751	78	0.012889510419831057
17.374495470792155	39.88152630838627	57.256021779178425	42	0.012421590697102688
34.774024684932016	52.151048713133775	86.92507339806579	60	0.012284601928942972
31.30645451935738	38.35872577404971	69.66518029340709	63	0.013664808869589533
24.964378917116704	29.401543000414378	54.36592191753108	81	0.010948280778745517
23.232835311601367	27.70308702314667	50.935922334748035	75	0.011715156283688641
18.24014626496379	41.027761497441304	59.267907762405095	36	0.014740296870989942
22.88001348276771	44.24944334336075	67.12945682612846	45	0.013361925838493834
28.94015579029116	25.785522226184728	54.72567801647589	99	0.010966228881880301
34.12232737906548	31.7497185532027	65.87204593226818	96	0.010967943298434842
28.48622106030009	25.062654168073287	53.548875228373376	87	0.012589851333747102
35.01742905345834	22.457535208955857	57.4749642624142	117	0.011587470668002392
30.94910511202123	25.92015799431404	56.86926310633527	150	0.0075571639889777985
24.0484094806341	23.740049076201963	47.78845855683606	108	0.009345734407771207
31.710460214157163	25.82557155446624	57.5360317686234	93	0.012426510154149585
25.379415981873567	27.83156860828409	53.21098459015766	69	0.013550751831138531
23.082923420691728	22.890372482489745	45.97329590318147	72	0.013972988331034011
23.932499852607567	24.60795050688753	48.5404503594951	63	0.015556555351400223
23.21913770924756	26.76376741462199	49.98290512386955	63	0.01430402451983458
26.753139435159166	27.368262180888944	54.12140161604811	105	0.00936852735476349
38.530037934958656	27.01644505316023	65.54648298811888	162	0.00789308963834702
26.925742862877506	21.389765919156986	48.31550878203449	87	0.013512248958211055
28.212107706847263	24.010437576209135	52.2225452830564	87	0.012885184816410926
20.526477866178887	29.729647728998785	50.25612559517767	66	0.011475713407717891
28.298330973249573	20.9773363445092	49.275667317758774	105	0.011733751522090573
29.164820783190148	22.445927970775916	51.610748753966064	87	0.013807101366371363
22.923025504693513	26.938232255769123	49.861257760462635	84	0.010574572552201122
22.570486113358857	25.973926120062192	48.54441223342105	69	0.013075958538275567
23.229902352189068	25.470293766365582	48.70019611855465	66	0.014168363376329379
25.205909449200625	34.56333085102945	59.769240300230074	66	0.011972135597431979
26.17961607402936	32.992977319576326	59.17259339360569	66	0.01276924473214121
23.486185983926447	23.506260493854548	46.992446477780994	78	0.01281261323896161
29.435331209646943	22.093797605029774	51.52912881467672	93	0.013137062183625032
29.42985947730563	24.155555698304386	53.58541517561002	111	0.010355723788208024
19.695184217201906	23.993532797423413	43.68871701462532	72	0.012008543672377726
16.305090174136723	29.797596924075535	46.10268709821226	51	0.012346173604004758
34.35595582666954	21.81390344135876	56.169859268028304	99	0.013783315508021804
31.402067319834917	21.47715699176182	52.87922431159674	87	0.01494135612384177
26.7563961217141	20.948761723200708	47.70515784491481	102	0.011640002830282492
31.869147708989576	24.298799333356587	56.167947042346164	78	0.01549823134092165
27.694165288718573	40.72166015127538	68.41582543999395	54	0.013861735155949698
22.40321821036441	26.50609619080849	48.9093144011729	108	0.008183194771060519
20.87309957574697	27.739112928064266	48.612212503811236	96	0.008431220262227828
21.868714933001712	28.49758788795537	50.36630282095708	132	0.006224386528878369
27.167197045843693	24.457889685772628	51.62508673161632	96	0.011226795541222492
24.574936350254408	29.058202003495506	53.633138353749914	72	0.012280267186770598
32.28559204030428	27.37438310963938	59.65997514994366	96	0.01170767628393787
35.70161068218553	22.015162457640667	57.716773139826195	123	0.011304822379267623
25.61827378803079	21.534245257426562	47.15251904545735	96	0.011778146732939622
27.996247206983846	20.688770925967532	48.68501813295138	102	0.012104215086741239
41.77487051094479	23.52513420297968	65.30000471392447	135	0.010910223280375428
28.395365448247432	25.58694488784242	53.98231033608985	81	0.01329726943816677
24.189269715148704	31.775141215901684	55.96441093105039	69	0.011834944037122899
22.67044151947544	23.030167948704964	45.7006094681804	87	0.01136423532468605
22.078998975812347	24.398959877311235	46.47795885312358	69	0.013474305286784333
21.33914460353369	32.420942128929454	53.760086732463144	72	0.010133464590605702
29.467502930061325	26.262767002796775	55.7302699328581	78	0.013915925858322452
28.064333514788974	21.485616807799904	49.54995032258888	111	0.010860472220695102
24.54537960360814	21.153771913918774	45.699151517526914	90	0.0123472494138088
25.21323444419854	21.051820354867473	46.265054799066014	132	0.008605893264249403
25.804589413203118	20.299054209618554	46.10364362282167	114	0.010381300554743898
24.571440590328432	21.95717375436546	46.52861434469389	84	0.012897926848662838
31.61525455793274	25.985326713985717	57.60058127191846	111	0.010345821373318109
25.91848270880886	21.01774112673386	46.93622383554272	90	0.012878823918737238
35.07476753597398	23.493187970807718	58.5679555067817	120	0.01098224197222853
31.927996161094207	21.84957488487035	53.77757104596456	99	0.013125246309779839
31.86167013000802	22.515244004779678	54.3769141347877	150	0.008480614457947946
37.3714093819128	23.18548794627777	60.556897328190566	147	0.009422239461063105
26.261086412183726	26.71920079324097	52.980287205424695	81	0.012192330975621302
29.46545118557771	28.19614837882043	57.66159956439814	105	0.009829645295205598
28.898959119716285	27.73205504925222	56.631014168968505	117	0.008803742195883918
23.774054470426474	30.87088323113574	54.64493770156221	141	0.00584284461906604
33.76631783180954	26.481252075494737	60.247569907304275	153	0.007751187677013577
20.844519590910636	25.497675509651806	46.34219510056244	69	0.012492183364935992
19.7466827491783	27.774187869609232	47.520870618787534	54	0.014348454453971602
26.20208002504979	18.895329102520833	45.09740912757062	111	0.011306440592414601
23.348032389923723	23.69831712360447	47.04634951352819	87	0.011371243336491829
28.150732169625392	23.625385287075787	51.77611745670118	102	0.011097538514229247
29.211869421650306	19.873198681918623	49.08506810356893	129	0.010112093933333436
31.17149840455107	27.994409592570815	59.165907997121884	117	0.00922758432417238
26.052114231494404	28.154731536249496	54.2068457677439	90	0.01050108518021022
32.54475822343227	22.516219858819465	55.06097808225173	114	0.01131636488697826
27.24501675938008	21.626799561873476	48.871816321253554	90	0.013068694880269582
31.638370298125338	25.546362915521883	57.18473321364722	102	0.011397177755731317
24.885051507060645	26.349298107580843	51.23434961464149	87	0.011026975227725387
30.73680797177503	25.75226546310187	56.4890734348769	111	0.010209662010696964
29.760094719702174	25.73419314185775	55.494287861559926	105	0.010558597428157766
25.186417219661507	26.62373147346711	51.81014869312862	81	0.011858295511201405
22.992540847417825	27.593072426214388	50.58561327363221	69	0.012672768539776672
27.043240452136956	33.86907272905721	60.912313181194165	99	0.0085531858943535
26.568342146437324	25.775873138633855	52.34421528507118	105	0.009733417245683176
28.372787961755325	28.302725359483443	56.67551332123877	102	0.009821417366223991
34.4207704617279	26.086719154616215	60.50748961634412	99	0.01226058805970723
24.993039886562812	32.3233958196538	57.31643570621661	87	0.009498507177225689
28.46305174478665	27.925733933893138	56.38878567867979	90	0.011264589750505963
28.354715752287582	25.963386716069294	54.31810246835688	96	0.011093276022575245
25.94675387198432	25.067419304246144	51.014173176230464	99	0.01035439036435889
25.571607551392994	32.468137583407184	58.03974513480018	96	0.008729339085255979
26.052888275132435	24.443791326211343	50.49667960134378	102	0.010261965262743035
23.701617276416794	25.88305230655421	49.584669582971	96	0.00976964981508591
48.44954814541603	27.356475027059023	75.80602317247505	156	0.009425834206673308
25.59961038215278	25.493526638750712	51.09313702090349	90	0.01114442839174299
30.8795559072434	32.44073851717816	63.32029442442156	165	0.005847644246260339
31.7010291431975	23.603934512668754	55.30496365586625	120	0.010236513402218409
37.264641834935674	23.814303951196784	61.07894578613246	126	0.010784498251383008
29.13998420632073	23.9975384005436	53.13752260686433	93	0.012331661739673974
32.476871098580304	24.623813915579372	57.10068501415968	90	0.01348282020986825
36.98573666148521	22.60455303469754	59.59028969618275	120	0.011653865582511948
29.21069309410577	28.58774772415235	57.79844081825812	81	0.012538686575555576
39.98061179576818	26.284172461025985	66.26478425679417	108	0.0123522968062133
31.216512517863766	26.88919649807313	58.105709015936895	93	0.011953261003358272
27.85418519217434	34.17173257448433	62.02591776665867	99	0.008687553333340342
29.25304839405954	28.556306781795143	57.809355175854684	90	0.011305484156072987
35.8123357206368	33.50170993028323	69.31404565092004	81	0.012949543134689469
25.85846199275291	27.35467036896566	53.21313236171857	93	0.01032252858604183
24.620409752923738	27.08623081401357	51.70664056693731	81	0.011515925003758365
28.82273537259684	28.568681975894243	57.39141734849108	87	0.011567822128996397
41.260637792819686	30.568965088870492	71.82960288169018	150	0.008216738858463657
29.605624757497306	28.238382428270445	57.84400718576775	120	0.008620917083675409
27.1758053481187	25.93931946260242	53.11512481072112	93	0.011118087146398923
21.808511226636217	26.86422214917123	48.67273337580745	72	0.011908718480101929
24.723856036163152	30.296155908701206	55.02001194486436	78	0.011036175668948935
16.33106856627886	38.71767725463185	55.04874582091071	45	0.011282606442162687
18.504738880293544	33.600967229796964	52.10570611009051	54	0.011721085340550524
38.09666124272246	44.5897860207576	82.68644726348006	69	0.012912139234576873
28.339608247108465	33.20793511461629	61.547543361724756	66	0.013487473564800236
34.10892084659241	35.959436918177914	70.06835776477033	87	0.011061984518938145
28.10798064069887	45.63615400157791	73.74413464227678	63	0.010989699898520226
32.81274592926621	33.91783245225371	66.73057838151992	75	0.013017387095180388
39.1673084575841	32.688176536369994	71.8554849939541	102	0.011140484181023877
22.572463445260453	34.27502118649831	56.84748463175876	60	0.012165649281119243
38.76391921351412	34.62475042019884	73.38866963371296	96	0.011289100757105206
25.800479466427504	25.146376716110723	50.94685618253823	87	0.011708535439654078
29.93199169560926	28.471680441372325	58.403672136981584	81	0.012796684394266539
41.94514482594534	30.3598709271159	72.30501575306124	135	0.009273556090656967
35.13675976512203	27.35014918566398	62.48690895078601	165	0.0072242743843020235
35.07785973890965	23.280621405802908	58.358481144712556	120	0.011048439738243635
22.374292776443554	34.53279068561836	56.90708346206191	69	0.010444077030388606
25.634979272123488	35.73226426298978	61.36724353511327	66	0.011821840089226949
20.98901196748349	28.53270894830059	49.52172091578408	108	0.007365228931105356
21.880069040831938	30.41018648740509	52.290255528237026	87	0.00898836157105604
24.16757488156063	27.76059163896358	51.92816652052421	90	0.010038655249135683
24.857412038475577	27.45914458995259	52.31655662842817	81	0.011481245746208433
23.55553097285545	27.383435411563774	50.938966384419224	84	0.010660312301956422
27.200920096524744	23.27233986380139	50.47325996032613	93	0.012009709674832288
26.268841518921647	25.37685141481184	51.645692933733486	84	0.012203987593937421
30.451154651043645	23.23824385113845	53.689398502182094	117	0.010325950391636828
28.812392215426527	24.919322464042835	53.73171467946936	81	0.013685296724399224
23.048655788314175	26.55708628197525	49.60574207028942	66	0.01365773118978519
25.904455247051796	25.968758444035036	51.87321369108683	90	0.011091252338698314
34.6792279012217	26.288257792122046	60.96748569334375	162	0.007491490847173194
35.20069300838165	32.15710119333072	67.35779420171237	123	0.008672418976632883
30.20831123279224	22.45444587434571	52.66275710713795	120	0.010248182784906745
27.0142949109872	27.1183518684911	54.1326467794783	93	0.010722897083484685
22.237732757761403	25.149127441397813	47.386860199159216	84	0.01088069912762155
22.278109623210906	24.863482891475282	47.14159251468619	87	0.010608874617445224
26.05431584054966	23.18041712889588	49.23473296944554	87	0.012491608112871717
36.34449763327892	21.43335646799596	57.77785410127488	87	0.016444354349768903
33.74529926315721	25.898076987513896	59.6433762506711	117	0.010286469655536557
29.325562272731315	28.088365898012658	57.41392817074397	108	0.009550259916116322
28.17249705561526	34.68223105092055	62.85472810653581	102	0.008410044749943038
32.66612314917009	29.61155168663579	62.277674835805875	114	0.009408377105639966
22.68109228449427	34.36393794767805	57.04503023217232	90	0.008124509246385768
25.152220753247338	29.232052874895547	54.384273628142886	84	0.010662361632589669
20.095731996223353	28.672382630970016	48.76811462719337	54	0.014190303770984973
20.91221209828913	34.13389533947361	55.04610743776274	45	0.015320788544658518
19.081204676586637	26.02063404956649	45.101838726153126	63	0.012595716413213947
36.79593684407509	30.212940631708392	67.00887747578348	108	0.01064060769236053
27.18227856205323	26.86793917591194	54.05021773796517	93	0.010843169481167607
29.56243184267617	34.04827092568563	63.6107027683618	78	0.011560102432936576
28.51226715747219	29.77841116857761	58.2906783260498	87	0.011137912753437921
22.47301577814905	25.677401466185625	48.150417244334676	69	0.013145638978479158
25.184220704288187	26.772485018469915	51.9567057227581	81	0.011809369193811809
25.28508664941662	32.50950701801795	57.79459366743457	78	0.010641959806097384
35.19968402365101	32.517062880887785	67.7167469045388	87	0.01216454847134779
20.648422578402176	30.20811294413314	50.85653552253532	81	0.009277742239823913
20.212780298629184	26.90783250770191	47.120612806331096	84	0.009623001412027947
32.21754048766067	32.841053506415676	65.05859399407635	69	0.014293322262188253
24.953567816842366	32.811679713715684	57.76524753055805	63	0.012952259602972579
27.495796496545925	30.612532192169777	58.1083286887157	72	0.012841980202030888
36.79294056305946	31.444473291731665	68.23741385479113	87	0.01284777586929833
53.12080654548791	25.996317715613667	79.11712426110158	201	0.007988471159048553
29.90292433118427	24.161079333600778	54.06400366478505	117	0.009931482467046724
25.43620416545817	24.25500794155389	49.69121210701206	93	0.011125893352335613
34.31914634826773	22.963509006661518	57.28265535492925	114	0.01156802856661544
37.95591879640237	23.240510091359283	61.196428887761655	105	0.013302911744137393
29.09141852871991	26.762803628174613	55.85422215689452	108	0.0098281211422632
40.44593751284395	25.83337341983799	66.27931093268194	153	0.008884461146624544
22.23251046998962	34.934171621700436	57.166682091690056	66	0.010765691350654968
36.206644771852496	26.05407235525157	62.260717127104066	99	0.012695083888335412
30.43027719069646	27.377179967327127	57.80745715802359	96	0.011232101721703141
28.821293302344603	25.36902490226507	54.190318204609675	93	0.011773839251379443
48.372479646437036	35.86902146869868	84.24150111513572	114	0.010805199615055465
35.453311639436244	30.745084715652588	66.19839635508883	87	0.012717706739739022
30.35588602348652	31.283649642913467	61.639535666399986	84	0.011648180505670108
27.689928738718322	33.766835386170044	61.456764124888366	72	0.011999511527705842
21.996580458888495	36.27306068320394	58.26964114209243	51	0.013408743964980246
36.66411311462549	29.71071601312502	66.37482912775052	123	0.00942807209843113
34.28104540958936	34.26266035210838	68.54370576169774	90	0.011115411301573492
38.51032321181059	28.74414871282086	67.25447192463145	99	0.012387493887851913
34.49472857990274	27.394637628655317	61.88936620855806	96	0.012247896122200586
26.134590504041718	32.16301644539856	58.29760694944028	60	0.014300565766274056
23.04735247074964	23.091474973019626	46.138827443769266	105	0.009510676303011632
25.84155018991963	25.60938343397318	51.45093362389281	120	0.008387706141924365
28.10503504176426	35.129831776662954	63.234866818427214	117	0.007248064884920732
24.93170374644147	42.16476256512777	67.09646631156924	87	0.007703436290567238
21.814254896290645	22.69943213495846	44.513687031249106	108	0.008996229596919958
16.663258481301945	26.61944326674265	43.282701748044595	78	0.00899115587336854
19.748751994774604	24.793636764531445	44.54238875930605	84	0.010062012225254666
35.7450017911374	30.34077599390551	66.08577778504291	84	0.013370021913038639
45.04392082813187	19.89524095581583	64.9391617839477	126	0.01354496341987024
35.45297463017982	18.346362022193695	53.79933665237351	114	0.013614862904324149
29.611066153552965	20.725405576091656	50.33647172964462	117	0.010941912496118924
26.78588803445929	21.919305318818694	48.705193353277984	108	0.010665495708281974
29.736541356316824	21.484910442770985	51.22145179908781	120	0.010445203176872512
26.057006230415546	22.622997546456347	48.68000377687189	96	0.011516033134833792
23.328504493672817	21.49115368295054	44.819658176623356	99	0.01071099711840446
27.58222723879082	25.602093505610974	53.184320744401795	111	0.009502154976371815
20.367738580960356	27.793146384625587	48.16088496558594	69	0.011494677317016143
23.043653084136402	23.315380763543345	46.35903384767975	81	0.012241586536186407
25.944690356644013	22.513931531609476	48.45862188825349	99	0.011171064292094753
24.920845745469606	24.356116324033202	49.27696206950281	87	0.011685393196766711
25.361066279488146	19.48050640234398	44.841572681832126	96	0.012529225999171202
23.983484476669435	22.626027200922774	46.60951167759221	78	0.013367193683228546
28.179972682186	22.479808040764926	50.65978072295093	93	0.012604420605323866
30.867154733764586	25.009121354190647	55.87627608795523	96	0.012081057316505222
25.739801229037912	22.675850427159194	48.415651656197106	90	0.012159076162426534
35.034519014273044	23.570647526221197	58.60516654049424	102	0.012882710427086495
32.06637682881646	21.30856096123789	53.374937790054354	105	0.012616469684474815
26.021723975550117	24.097478975673134	50.11920295122325	108	0.009782233784731809
26.19666248737234	25.387232220205252	51.58389470757759	123	0.008315590136964366
30.615827099038107	27.566181105827425	58.18200820486553	93	0.01158788899450163
26.28249844338561	27.87710813019758	54.15960657358319	84	0.011406385117714534
25.379964745841665	24.993983197963654	50.37394794380532	81	0.01248267860118388
24.51802708727962	25.93230158301151	50.45032867029113	72	0.013334908499952933
23.58206441484744	24.378525756245974	47.960590171093415	84	0.01162188722947987
22.891557979547258	27.711916304380402	50.60347428392766	75	0.011583066153544888
23.770636871674807	24.443588048604713	48.21422492027952	75	0.013066703779858987
21.548222887280055	25.40080004178119	46.94902292906124	66	0.013427593877888944
28.134489132170877	25.441310573930785	53.57579970610166	93	0.011552779447958928
26.437940973490637	23.160785853789687	49.59872682728032	96	0.0114439466933379
30.160382470135808	18.612571754836004	48.77295422497181	96	0.01447712447692095
26.809058052063513	23.44252966638075	50.25158771844426	96	0.011458759595685857
34.85235263868404	24.845916092962813	59.698268731646856	96	0.013173753719390356
36.472848997276294	22.065542153526977	58.53839115080327	108	0.013033221303515655
22.909846829813524	33.19635134530067	56.106198175114194	75	0.010095139674116235
30.381664913356794	33.13909392430392	63.520758837660715	78	0.012034538332414657
21.331367935961374	33.17557254542672	54.50694048138809	84	0.008527602131255077
23.64640829531976	34.93972177979681	58.58613007511657	75	0.009942547134792515
30.0703726420517	26.814249551428475	56.884622193480176	102	0.010637635484672834
42.15085636640666	25.244862916911043	67.3957192833177	120	0.011805559304199485
35.27881664111675	32.493223581938324	67.77204022305507	99	0.01071263965541207
37.38211032423574	27.27005661543298	64.65216693966872	105	0.011860771714857733
36.17459146252631	27.644908062554524	63.81949952508083	114	0.010587574747385328
26.412570786067374	27.671492939934364	54.08406372600174	81	0.011935840408126728
25.028936858761057	32.416163056181155	57.44509991494221	54	0.015286490733806984
29.33092409369619	33.78259332200325	63.11351741569944	60	0.015027815806168163
25.553760254591474	29.334318577734642	54.888078832326116	72	0.012554213393871815
26.796125653331906	36.21886426072264	63.014989914054546	57	0.01401673242445918
22.727607749305395	24.737154286948662	47.46476203625406	96	0.00979351359537418
23.074833835215276	24.634172986529347	47.70900682174462	93	0.010253770052198692
34.92216135306961	25.360579655843967	60.282741008913575	108	0.011566271256712524
33.41440521463345	24.789584134771673	58.20398934940512	102	0.012072391870320803
25.047433278852782	29.885419119546622	54.932852398399405	90	0.00975808256037815
24.90111206564212	30.592636111246815	55.493748176888936	78	0.01101462593111283
33.91115172669248	23.84582546624107	57.756977192933554	135	0.009453766765034762
29.434567004775804	21.666456553885528	51.10102355866133	108	0.011461934833161302
23.48264827895256	25.195479742750962	48.67812802170352	81	0.011729737800017771
23.8486185873256	29.496999859519757	53.34561844684536	81	0.010553105610788387
23.20300889370221	27.447771107992125	50.650780001694336	111	0.007963022396064211
43.87630935576236	27.053173533970597	70.92948288973295	201	0.006918346204416614
28.085415120209642	22.929001363728165	51.01441648393781	126	0.009156599071026833
33.63608769835473	23.025537688302204	56.66162538665693	108	0.01202904760154378
36.02152709865218	22.915124099140968	58.93665119779315	117	0.011648418713977317
24.648505648412353	25.042106588607062	49.690612237019415	96	0.010298097790069955
21.09957833025489	24.277553023249443	45.37713135350433	84	0.010742171316371797
21.167548393232693	20.239867969064576	41.40741636229727	102	0.010124404989001037
19.94879591628027	23.766352391716925	43.7151483079972	90	0.009769031054866198
18.17839958778385	32.05015811532005	50.2285577031039	78	0.008309953523955345
30.6944807338388	32.75093594758836	63.44541668142716	93	0.010257847428510406
26.506526404915604	27.18381345660231	53.69033986151791	114	0.008613286664602218
34.08564696754708	22.590566903283015	56.6762138708301	159	0.008346056039317191
23.38171348085912	24.368285844159622	47.74999932501874	69	0.014065158589249607
27.37646278395324	19.792368561876405	47.168831345829645	105	0.011932281775471605
32.2856488964386	18.11693870309264	50.40258759953124	117	0.012616740205147779
29.4026849036943	20.86913495024084	50.27181985393514	105	0.012079801100779991
24.86788659117827	28.3814088804916	53.24929547166987	66	0.01375479135716837
23.507335585493237	25.015632234802382	48.52296782029562	66	0.01448239209301516
23.022838080969095	28.472190651146825	51.49502873211592	75	0.011398395528450279
21.556677584337066	27.005342833051508	48.562020417388574	84	0.010078375983038344
22.963147631144174	22.19937104780856	45.162518678952736	93	0.011017281114024316
27.33599375307909	23.92835608226341	51.2643498353425	84	0.013086126348964024
24.22355843199305	22.223835016612387	46.44739344860544	87	0.012224021182618339
31.266415291639404	30.370515820539758	61.63693111217916	126	0.008104155717409797
40.73442990881471	34.26179429763352	74.99622420644823	96	0.011773096408448341
35.85668662538805	29.58093303244888	65.43761965783693	87	0.01316612312576095
32.121093530090505	27.86275592204691	59.98384945213742	84	0.01316947794073106
36.18546688549514	33.999548014100505	70.18501489959564	69	0.015154311133526365
28.54249868968469	32.77202606326506	61.31452475294975	66	0.013693394031473198
49.191055770465766	31.58342498350832	80.77448075397409	135	0.010035051424725272
32.83312740790463	37.40013468825313	70.23326209615776	87	0.010449551486646022
35.40355597030907	33.71230126182172	69.1158572321308	99	0.010462036708038733
28.494628425938117	27.514689060092934	56.00931748603105	72	0.014242566986952579
29.30278232945739	25.16297694866925	54.46575927812664	93	0.011978999247785208
29.804067059895488	28.626646696821503	58.43071375671699	84	0.012254383672431939
22.76853565766367	36.271764848438366	59.040300506102035	87	0.008078771509798561
25.330226673812994	32.708683103025884	58.03890977683888	81	0.010214157331925527
28.681742703758907	36.10990224944161	64.79164495320052	60	0.014056887850805997
34.27290172193488	26.554155804654883	60.82705752658976	87	0.013744546569966605
26.725378279376553	28.834189924725084	55.55956820410164	69	0.013713839066142201
31.54563938715182	29.342778153520054	60.888417540671874	93	0.011324326319201479
38.80039817482884	27.82847029621426	66.6288684710431	123	0.010240534844231802
35.75607502676958	31.936544850785932	67.69261987755552	105	0.010321812523468527
37.69204514108884	25.686367174009405	63.378412315098245	111	0.011738636533885802
27.926207767008464	30.00317446789264	57.929382234901105	78	0.012168975996887325
35.20720668905544	28.470211206259382	63.677417895314825	81	0.014337390621750955
34.370268408647156	38.127898059253134	72.49816646790029	93	0.00996879042351014
29.606494982088368	28.738451946743684	58.34494692883205	111	0.009203832106403183
26.201249256588746	31.4555227278236	57.656771984412345	63	0.013875821114617153
27.648696442376142	30.801979294772842	58.450675737148984	69	0.01339415426068449
23.89264684926145	31.59825497393265	55.4909018231941	69	0.011774005250290485
27.96868196208156	24.89236618291467	52.86104814499623	87	0.01248852479291065
31.91719730414296	37.95463914334367	69.87183644748663	129	0.006825076156565411
40.61203511066083	35.94287971673127	76.5549148273921	132	0.008263553035039463
27.615440179623242	27.586732053570174	55.202172233193416	90	0.011119449721051002
30.63419908181983	28.50272579757808	59.13692487939791	84	0.012535230122695874
26.252256299133386	40.708300837715306	66.96055713684869	60	0.011966475449642243
24.871729113054897	32.15784776850409	57.02957688155899	84	0.009839755650421512
28.14921586248626	37.70537820825652	65.85459407074278	105	0.00766203587352091
42.52405343763754	33.16165018815514	75.68570362579268	114	0.010443026433445548
25.59281900000039	34.05396243134068	59.64678143134107	72	0.01123085576705918
26.007113116658157	26.679260119660082	52.68637323631824	78	0.01258604121662703
26.311858997931502	24.88776847568569	51.19962747361719	111	0.009375643551675385
25.546986949973114	26.915227077542763	52.46221402751588	93	0.010353291364330773
28.2241217163961	33.88719840105296	62.11132011744906	66	0.013244179745749231
34.62500888071991	23.897218691509885	58.522227572229795	114	0.011334578655829687
33.442861561675684	25.526343094887533	58.969204656563214	111	0.010882656432826508
24.667990501470804	24.209288864534642	48.877279366005446	84	0.012066705735427915
31.251915311050244	24.443934193805507	55.69584950485575	102	0.011647973712408192
26.399622491756237	26.66761584668028	53.06723833843652	84	0.011818245496245121
20.62836427940654	28.899775403163225	49.528139682569766	84	0.009252263719414896
25.39050104121624	29.56095902902225	54.95146007023849	78	0.011467496661430876
32.53909653351485	28.637806024900524	61.17690255841537	114	0.00960584292527008
29.04718284403952	28.925777153537325	57.972959997576844	102	0.0098335728234777
21.999006760654105	26.073327204050095	48.0723339647042	75	0.011768428712064644
29.361111105447588	24.817611707718616	54.1787228131662	63	0.017878763464683974
23.114070129985038	25.729469272748304	48.84353940273334	72	0.012843695126378734
24.586278394433208	30.339706826058183	54.92598522049139	72	0.011892801361386582
34.34587251349326	30.205979929295875	64.55185244278914	126	0.008695431003868138
25.63121632890255	29.326215964805325	54.957432293707875	96	0.009438788249775952
26.520680340605345	23.482319920323725	50.00300026092907	99	0.011014542585115871
26.591258427977778	22.913002724848056	49.50426115282583	93	0.011950389010325002
25.007385717099126	26.236213043921154	51.24359876102028	78	0.012382209004141984
26.446600509786922	22.969201925844647	49.41580243563157	96	0.011513247264099512
23.19604168100512	27.837576809498813	51.03361849050393	81	0.010795238328053238
21.308379888338713	32.14126627734373	53.449646165682445	69	0.01063411056603828
19.60247552026168	30.723702535814855	50.326178056076536	57	0.012490472841725874
33.9207256558591	22.337649609299152	56.25837526515826	87	0.015317132143287544
26.871100515659737	21.996362362343266	48.867462878003	96	0.01199592964142133
30.06262506646731	25.522568285876115	55.585193352343424	87	0.012907208282521804
26.25881823367962	22.64757363185319	48.90639186553281	102	0.01088888762474823
32.03289255336132	21.74519912081853	53.77809167417985	93	0.014046469270838398
30.363853814504278	26.188777909351753	56.55263172385603	105	0.010577575470672377
29.246185541193483	23.04135871174686	52.28754425294034	111	0.010650824515226323
30.172747439422462	23.902415278520696	54.07516271794316	96	0.012268850991310356
38.98657674695211	26.60535008100243	65.59192682795454	105	0.01239811304024368
36.73846188809919	27.39439298112483	64.13285486922402	102	0.012031205823903712
31.120266964334792	25.527634563648828	56.64790152798362	90	0.012777362804746416
27.571555989942127	23.178595857275234	50.75015184721736	93	0.012157193197488736
39.22461067808864	30.52866400186834	69.75327467995697	114	0.010456986777196354
36.61360624856481	32.00322658272407	68.61683283128887	78	0.014106989368708953
39.92642781568742	30.540847760854305	70.46727557654172	111	0.01086678673797228
37.28155317042027	29.106495167529484	66.38804833794975	105	0.011329356298503105
24.66749004043931	31.248600316429936	55.91609035686925	78	0.010762460526409438
26.14474422403903	38.34333767062908	64.48808189466811	63	0.01190566086692141
22.35548563169067	35.48499511360846	57.84048074529913	48	0.014684800744268475
35.021751620084856	21.34646193204943	56.368213552134286	129	0.010859572677300651
32.08728220064135	27.349615417237104	59.43689761787845	111	0.01008863304699197
23.242545459523576	32.44162430858431	55.684169768107886	72	0.010825294342088345
36.78819432812052	29.275310445056228	66.06350477317675	87	0.013496195853794721
31.773897026013415	31.170476013341315	62.94437303935473	84	0.012070205070614563
60.27245789455491	34.26238014520491	94.53483803975982	114	0.01284404135026984
50.61703748447712	30.107969585562532	80.72500707003965	135	0.01053977957771572
27.100800055984692	28.154184129553116	55.25498418553781	87	0.011181094967713733
29.861083129171185	28.733320226280945	58.59440335545213	105	0.009790839635408907
32.44172387020609	28.586732243756554	61.02845611396265	78	0.014027389477912492
35.26216296826418	27.070834247130087	62.332997215394265	111	0.010840150782093105
32.21086716993458	26.06499971541519	58.27586688534977	108	0.010748006631558346
38.5277355273827	36.1972794169199	74.7250149443026	105	0.009959142969790348
26.929787250793368	28.699399005171472	55.62918625596484	75	0.012730953017207032
23.875588979622712	33.19481375365884	57.070402733281554	84	0.009306962934367554
39.92738311894564	37.26965768761775	77.1970408065634	117	0.0089790083538415
57.07729230100127	38.38624058173044	95.46353288273171	132	0.009957276164510167
25.182254884749923	34.77507684514499	59.95733172989491	72	0.010915034415525078
18.93590283780656	42.64529292322813	61.58119576103469	36	0.014725093666130538
30.096111162680437	51.27002328753759	81.36613445021803	51	0.01306495881590081
30.41925490924253	29.606685457523188	60.02594036676572	84	0.012138846591243545
28.92011708190961	30.790709704794295	59.710826786703905	78	0.012249966977528236
28.882465271183257	39.04330663189926	67.92577190308252	66	0.012104300201353436
37.74553199498749	33.81640503065415	71.56193702564164	93	0.011628700443992102
28.45780442508484	31.09381139471159	59.55161581979643	84	0.011160871241174793
48.37346707587098	36.91765994620205	85.29112702207303	102	0.01184396621389907
27.070205846248378	41.455343633894834	68.52554948014321	54	0.013427479870790293
29.304191987169496	23.581589315114456	52.88578130228395	111	0.010497467946971139
27.91107464980503	22.125313176023454	50.036387825828484	102	0.011541958505511958
32.4777503345632	30.737027786389937	63.214778120953135	72	0.014448391666590047
26.019128333654912	23.61352759073595	49.63265592439086	81	0.013230568862640454
24.2376673714285	22.619198243710926	46.85686561513943	84	0.012508484034204148
26.380615481105437	25.98881822983555	52.36943371094099	87	0.011618781285044627
32.59477552200288	26.951535579297076	59.54631110129995	111	0.010303105063811727
20.012405164183814	22.842028150010183	42.854433314194	81	0.011206835876002639
36.5589813323631	27.360885854695	63.9198671870581	114	0.010738153245381937
29.272253999901416	26.581219532313504	55.85347353221492	102	0.010502350084367035
42.838294464157414	25.952841070638048	68.79113553479546	117	0.012019916159054355
27.75990719275196	28.54365566838736	56.30356286113932	93	0.010538237649946321
24.32801595920098	28.31364703588704	52.64166299508802	81	0.011045771275215983
28.460759830604335	28.625928004799402	57.08668783540374	78	0.012767075589610297
40.301652048888215	28.30919028463548	68.61084233352369	141	0.009057915556377073
28.754223152955486	25.863058590436406	54.61728174339189	81	0.013314377955617376
27.303576851040553	31.14252405858565	58.4461009096262	78	0.011643857749447884
25.372340064855806	38.58966326154255	63.96200332639835	51	0.014294130799385414
24.91287635926104	29.595521651310136	54.50839801057118	51	0.017276463420703807
23.210083028167407	28.705863360205488	51.915946388372895	78	0.01095938839500629
27.836468361224902	27.740235127305773	55.576703488530676	90	0.011138891645609772
33.13509837847255	29.125109619313164	62.26020799778571	108	0.010148582563333449
24.51304326631817	27.342894222349564	51.855937488667735	72	0.012824211493687822
32.79291577045691	24.734195249337183	57.52711101979409	117	0.010407991964806164
26.063755149443317	23.161021310442443	49.22477645988576	99	0.010986725076977283
32.75956901047121	29.143931257657318	61.903500268128525	102	0.010655151864020362
32.67784522835251	30.4538574283858	63.131702656738305	102	0.010311173360444587
26.125700471166525	28.038836562459863	54.16453703362639	102	0.00931296178480009
34.68674684419995	26.163037371321906	60.84978421552186	102	0.011938452040283577
42.974921240923244	32.34508226746144	75.32000350838469	108	0.01129154337964395
29.211914987521777	27.516434549175347	56.728349536697124	84	0.012425908882745682
30.663709848387096	26.36821803936724	57.031927887754335	102	0.010911467887658751
27.032026248543588	26.684986700575728	53.717012949119315	81	0.01246112087043376
28.85028610934913	29.10866016299882	57.95894627234795	75	0.013247772408514028
29.51132698557354	26.46966453251396	55.9809915180875	93	0.011619323967553497
21.171813517709925	27.90143273295588	49.073246250665804	75	0.010861300058836032
26.185766781341773	24.8464185772353	51.032185358577074	72	0.014421798757701072
24.278921189627013	25.680732361490563	49.959653551117576	63	0.015239319472599324
27.305457953087284	22.6803614990626	49.98581945214988	96	0.011875783722485326
41.738338612385775	36.57497585380477	78.31331446619055	87	0.012625295365086643
25.502657691375248	34.318953864913546	59.821611556288794	66	0.012146381818679287
39.573090616235234	39.69977493267754	79.27286554891278	90	0.011085514437129664
22.566072944187695	35.940854963071416	58.50692790725911	51	0.013783975268190552
21.63408060493147	40.33823089624679	61.97231150117826	45	0.013766132597328557
20.949129936724162	46.914339861463745	67.86346979818791	66	0.008069791372294138
33.52774326586163	30.962148715898422	64.48989198176005	87	0.01216744204320852
30.368233586710033	38.51423188728293	68.88246547399297	105	0.007988048840265908
44.21508269694886	29.833496858187466	74.04857955513633	99	0.013247868400775324
29.92386711317232	29.01511063720075	58.93897775037307	69	0.01481764649646434
27.870317368916673	33.13761397828882	61.00793134720549	63	0.013976620402935236
19.054647163932586	36.493931274998225	55.54857843893081	63	0.00962053046576419
23.837654234208536	38.81566213466441	62.65331636887294	87	0.007939677913664228
24.869209683690038	27.56471855032023	52.43392823401027	90	0.010307530695185578
47.35870049928448	32.78750345418614	80.14620395347062	123	0.010483643379510953
33.27678245185888	22.86070018792238	56.137482639781254	90	0.014401053101224184
38.989816710647744	20.915346762187884	59.90516347283563	81	0.01874220300151158
35.79809244305955	33.11636837482498	68.91446081788453	135	0.007831572399168655
32.53131909700358	30.18625960446063	62.71757870146421	108	0.009768313523008944
31.0581157385841	26.63868437454049	57.69680011312459	102	0.01093106349018856
32.7551081919562	27.424823637128437	60.17993182908463	150	0.007558667529320366
23.929520365111408	28.32997812193541	52.25949848704682	102	0.008660429335189151
38.235968727086544	25.72067506090769	63.95664378799424	108	0.012168201162043408
25.54959402362695	29.965219664079076	55.514813687706024	105	0.008472227092823026
28.616686106498108	25.49326659269324	54.109952699191346	138	0.007867954597862126
32.5530586434269	37.00347664337651	69.55653528680341	102	0.008926718106521422
23.93239431608324	26.733073129696116	50.665467445779356	87	0.01060203536574702
24.03615388284597	27.058822069836605	51.094975952682574	84	0.010917647671215898
35.667430834385314	26.267988874019903	61.93541970840521	93	0.013306010177120482
32.1759343985003	23.810660217729954	55.986594616230256	93	0.013263159213575224
30.902227470065398	36.1088366168305	67.0110640868959	81	0.011012930581584398
31.910608418583713	33.64298449191919	65.5535929105029	75	0.012831588816038023
31.09938539451839	31.112921093890588	62.21230648840898	90	0.011107623812107283
22.552679921790574	31.552929108440924	54.1056090302315	63	0.012349273401382988
32.35792402708809	36.9537856696944	69.31170969678249	108	0.00840163832471478
26.369545441732892	28.567906431299487	54.93745187303238	84	0.01123088907900222
23.101650665162516	32.92210284796707	56.023753513129584	69	0.011115683429021571
27.182274348154458	34.953425830397386	62.13570017855184	66	0.0125755840418647
30.537516934672517	40.94717009312803	71.48468702780055	60	0.013397841358722835
45.566912609414416	33.90036093367051	79.46727354308493	81	0.015173582887970655
27.07668289023815	27.801552323164668	54.87823521340282	93	0.01054912525216773
25.066652024262666	31.90181278407688	56.96846480833955	72	0.01161840448653397
38.04490027030363	27.622917926341998	65.66781819664563	120	0.010411006642085907
31.77680937037311	24.787561513439876	56.564370883812984	102	0.01166938483101586
29.81701374736611	32.7508096305797	62.567823377945814	87	0.010734371773396487
26.398339752096476	28.015276307382514	54.41361605947899	75	0.012770053125172171
40.891471899885474	26.43896660357549	67.33043850346097	111	0.012149487136068147
41.019267987411695	27.997637402959512	69.0169053903712	111	0.011726528805441876
31.475153839507243	33.49101983237736	64.9661736718846	87	0.01098752217045673
31.76918295079906	29.244794160961842	61.0139771117609	102	0.010401568030347403
28.042717338810917	30.788405308075475	58.83112264688639	78	0.011976825925202734
23.261909047230084	32.59676513450256	55.858674181732646	72	0.010792396266227858
29.759091901636218	30.479354686458393	60.23844658809461	99	0.009927800085710424
31.498865039442197	26.418908802573032	57.91777384201523	108	0.010485511778346673
30.21939134194363	26.815889488589722	57.03528083053335	120	0.00907305423088132
42.63411039262108	31.52665648649656	74.16076687911765	105	0.011753180832317741
38.07461440691225	24.958850432788662	63.03346483970091	126	0.010607670476053689
32.57347563716149	30.55626818009068	63.12974381725217	99	0.010574257959693889
33.155411911511784	38.62303391718904	71.77844582870082	138	0.0064789071769910875
27.658318305423794	30.665071650678673	58.32338995610247	84	0.01104140779262343
26.23730355793169	29.00515462178128	55.24245817971297	78	0.01191625907655741
28.722230338408906	33.4049816855082	62.1272120239171	96	0.00932460465111181
23.073596836762512	26.13276566928964	49.20636250605215	81	0.011271420449650026
31.740366235714752	28.76930667954995	60.5096729152647	81	0.013242411514464732
29.71836501171896	29.441232043360827	59.159597055079786	75	0.013423655735329356
28.33254651363402	23.23061653642568	51.5631630500597	75	0.01533751096584075
25.10098272932757	39.9272965848956	65.02827931422317	75	0.009382558094642716
19.402274321261466	29.47360612810504	48.875880449366505	72	0.010134709788269521
32.192258264409205	23.127297515195767	55.319555779604975	111	0.011335070976765203
32.28330963907412	24.230256316485526	56.51356595555964	96	0.012726953735477553
28.76263291037956	28.837401145565295	57.60003405594485	69	0.014465630598441113
28.625867739592135	22.776048791405177	51.40191653099731	126	0.00931987827642774
25.377147890602338	33.8786883042491	59.25583619485144	102	0.007907639567333723
25.640506297485192	25.320259201793707	50.9607654992789	108	0.009343470142258198
34.679103607960556	31.362075796875896	66.04117940483646	96	0.011191092011949646
28.69186868898255	29.378412363315302	58.07028105229785	93	0.01057036110844186
19.662866751431196	41.26035839677776	60.92322514820896	45	0.012494132538971423
17.199266803292517	44.013632681402264	61.21289948469478	33	0.014420765339343031
70.25057284031969	31.029804678917348	101.28037751923704	162	0.010534741769800415
32.82589015851352	33.54410349295187	66.36999365146539	93	0.010585719890426528
38.45867859939791	29.905560537399946	68.36423913679786	102	0.01169439313172286
21.35570572619067	27.364470093573352	48.72017581976402	63	0.013209768575125009
31.38991343550385	35.041982439211374	66.43189587471522	102	0.009046977375694331
28.6639714248166	28.839750880540244	57.503722305356845	108	0.00921848744837753
28.077141488917214	28.886944487144056	56.96408597606127	93	0.01053370991373433
29.752050137600726	34.887843367285306	64.63989350488603	81	0.01098395559036001
25.4501504807921	28.635462359513586	54.085612840305686	81	0.011326444196466088
26.44912412961474	29.366757494315774	55.815881623930515	81	0.011438169117794616
21.64713213056318	28.86110566985306	50.50823780041624	78	0.01035118124840312
22.01337297293565	24.96488440373499	46.97825737667064	84	0.010858249668510657
36.327999351206856	26.54668054815509	62.874679899361944	120	0.010366230627598215
34.909698319771465	27.077492818484167	61.98719113825563	111	0.010764648377416206
25.60652105451275	22.60159119617087	48.20811225068362	105	0.010408110405164456
28.132421195336576	32.099748301806436	60.23216949714301	102	0.00890168861885793
29.288169708258728	24.881699015572934	54.16986872383166	108	0.010392644380652953
29.185402508199406	31.142080247653578	60.327482755852984	114	0.008367983049122904
27.990752296830898	27.85424338373675	55.84499568056765	99	0.010136675528428798
24.248739099505517	24.325238930820948	48.573978030326465	90	0.011085885187806708
23.698311359632072	27.914173333785563	51.612484693417635	75	0.011822963381149914
30.298776374189828	27.06760933293866	57.36638570712849	87	0.012455610970008019
43.767523681463615	20.580615078101633	64.34813875956524	105	0.015662974477017158
36.4009093401981	27.76730770291996	64.16821704311806	99	0.012206783800117051
28.465404443780145	24.776495382817885	53.24189982659803	87	0.012684941586142228
31.037693643597876	31.68894570132143	62.726639344919306	81	0.012161711220783645
26.618928823122825	25.173457871730196	51.79238669485302	90	0.01156485156564298
27.911850373701213	32.60052024241055	60.51237061611177	108	0.008262362195298918
36.29122503987163	29.32302903699935	65.61425407687098	123	0.009446952201321909
29.449357081352385	31.927588759753743	61.37694584110613	78	0.012088375083462511
34.91136084735571	26.33276839299692	61.24412924035263	93	0.013093681235851229
29.30340292534104	26.071097206084694	55.374500131425734	99	0.010977479497476302
35.7046948148712	27.542352769971632	63.24704758484283	120	0.009994552752444518
29.941372831846294	23.904785674905014	53.84615850675131	105	0.011157561455431762
30.878074813546203	23.889467889116627	54.76754270266283	96	0.01246819199544131
29.550128858568947	22.703087636746233	52.25321649531518	90	0.013362570310075346
28.09961536274912	23.083715461791584	51.183330824540704	84	0.013676173603732616
25.908045431378383	22.458044246394223	48.36608967777261	96	0.01152878756699477
39.06465396448971	23.39443570771976	62.45908967220947	111	0.01276347848980861
33.16065638647729	23.161875085801725	56.32253147227902	114	0.011245264266287682
42.32602259640842	27.779205443781734	70.10522804019016	126	0.010599338896083886
24.03794089059904	35.2805538932212	59.31849478382024	78	0.009610368958028262
29.56509598740404	25.533604425466766	55.098700412870805	93	0.011931409487311353
35.50757843635513	29.845011466195615	65.35258990255075	141	0.008019536188970399
34.0804819769705	26.376108839963827	60.45659081693433	111	0.01078079172497439
38.23477391484411	26.03522352672161	64.26999744156572	123	0.010599029445789485
29.766664672737186	26.512591544325097	56.27925621706228	102	0.010646329068101403
28.89793593602611	26.78529338918763	55.68322932521374	87	0.012135652684874178
27.3550941046954	28.815178443269918	56.17027254796532	90	0.01069975388040112
30.89409361977956	29.840129363807137	60.7342229835867	90	0.011391732182243843
25.322144836902183	29.94786597333816	55.27001081024034	69	0.012812227415844335
36.12896856505949	33.90610289906558	70.03507146412507	114	0.00918011042175338
31.693116453789028	27.155815922324468	58.848932376113495	117	0.00953636778973448
36.19128609981401	25.50721410883921	61.69850020865322	114	0.011178334065166884
32.058611049787956	28.837399029339956	60.89601007912791	87	0.012395478827762436
30.60601127463434	33.945948524096266	64.5519597987306	81	0.011447178993829708
32.110906405017495	34.022640169594986	66.13354657461248	87	0.011021691640350606
29.027401980150316	26.824960031499856	55.85236201165017	138	0.007666972989574567
25.470062308867334	29.286346146701916	54.75640845556925	96	0.00940416262505795
33.125082430647566	31.31195571085155	64.43703814149912	123	0.008464850092724513
33.461089369322025	31.420830845358385	64.8819202146804	117	0.008940984512021206
27.20943133746641	30.567770849074957	57.777202186541366	84	0.010934392816326946
42.12987242669344	31.786818638501163	73.9166910651946	126	0.009662472558111066
34.119852917359225	28.88985728877673	63.009710206135956	117	0.009615479463197645
31.018885353296124	22.61393438534029	53.632819738636414	96	0.012978167604387494
35.37573320855878	33.222365968986544	68.59809917754532	105	0.009962036003588418
27.861856092604576	39.240881618650185	67.10273771125476	87	0.008896714633711592
31.596206682776046	26.041737413329752	57.6379440961058	102	0.01123718797327667
24.617880412190154	41.001269432807966	65.61914984499812	108	0.006281928936372296
31.465523623097763	28.23253450223567	59.69805812533343	120	0.009002711292387555
34.237628940748536	33.70781639918678	67.94544533993532	84	0.012039210384579647
26.17336067522463	33.21619020910659	59.38955088433122	72	0.01164336822835873
23.920562768798497	24.024705900345474	47.94526866914397	96	0.010384059209141485
26.63764260289043	23.773274127170275	50.410916730060706	96	0.01129578730130552
25.093582217166436	24.2208123399257	49.314394557092136	78	0.013150789349644679
28.20758996910695	30.626073841666237	58.83366381077319	87	0.010826223578353495
23.4512656405158	35.806804817092484	59.258070457608284	63	0.011536156563087397
27.39259259393521	29.549447139277337	56.942039733212546	93	0.010175946610833923
27.827915216425758	30.00014816067074	57.8280633770965	96	0.009862501690825047
30.211607391610336	27.255669767285077	57.46727715889541	102	0.010550826686859088
33.501090081123266	26.821851315072248	60.32294139619551	93	0.012573096322724523
39.008428424130685	29.164296217700297	68.17272464183098	93	0.013171950366069888
30.417843727614308	25.982069142376115	56.39991286999042	99	0.011294713193274485
32.61864131069984	30.331346409164528	62.94998771986437	99	0.010640369251082846
26.31805641532447	30.71284902300321	57.03090543832768	75	0.011905354532568233
33.753990199197965	30.12169752811195	63.875687727309916	90	0.012049598253322006
21.772284928392367	31.6320605054441	53.40434543383647	57	0.013255607033878474
24.701206856783045	35.638651269795645	60.33985812657869	60	0.012661142744661326
37.3312971200929	26.829701053007984	64.16099817310088	96	0.013102766737675246
41.26215872032327	28.84305165611728	70.10521037644055	123	0.010417055769902647
31.41871402974554	27.05821979275193	58.47693382249747	105	0.010588578495490171
27.899687548311825	30.453211792684684	58.35289934099651	87	0.010784022388723983
19.59853685855898	34.03671251241178	53.63524937097076	57	0.01151034667318969
26.679750030779775	28.65689492477674	55.336644955556515	78	0.01217119076194689
34.41244901545853	25.94577064127597	60.3582196567345	105	0.011600484427683192
23.31418022173598	37.098512132946745	60.412692354682726	54	0.013027599179812542
22.91894965287257	32.683735239728335	55.602684892600905	54	0.014195956996517184
27.564638744861842	30.703140317048824	58.267779061910666	81	0.011411260492593637
26.343435391254562	27.824165574451296	54.16760096570586	72	0.013348496856517419
27.38337964875649	26.697789872801398	54.08116952155789	78	0.013056487623828222
29.01498957521446	26.452366831071746	55.46735640628621	72	0.014836696586009106
35.32954959166754	25.384857800736082	60.71440739240362	105	0.011981625970506128
34.08050426317489	27.652843372193498	61.73334763536838	90	0.012873579949274714
31.075098281858637	26.296781896218647	57.371880178077284	63	0.017864405394390614
32.07795111271383	30.66515377700299	62.743104889716825	96	0.010758924355164009
28.811622990954252	25.377835103019816	54.18945809397407	99	0.011054981989194673
33.113843720510246	29.30463837355801	62.41848209406826	75	0.014544589862449183
36.23702685114271	35.82853781690175	72.06556466804446	120	0.00840167407278434
30.197627213366925	25.19244387418453	55.390071087551455	111	0.010239966737964137
25.099097269002993	29.697655169090257	54.79675243809325	75	0.011783218247496422
23.242140292077437	26.68786736022009	49.930007652297526	72	0.012551709779386536
32.41994494286142	25.6634602784513	58.083405221312724	123	0.009580571785022775
20.737481973982312	39.15884869492844	59.89633066891075	54	0.011354245837157318
24.401455566597264	32.41189770723479	56.81335327383206	69	0.011734877748549881
20.658860714479424	31.55121654466189	52.210077259141315	60	0.012110544336030555
20.737916696667128	35.808218771851465	56.54613546851859	57	0.011563818839345577
29.70080885976922	23.73929811104384	53.44010697081306	93	0.012587587263914101
28.955321626841425	25.419922347895813	54.37524397473724	87	0.012609084434569649
36.85200139799193	31.888991506254854	68.74099290424678	114	0.00972028260931245
42.07270017564622	28.19745894033383	70.27015911598005	117	0.011259376133712763
26.9630517944104	24.586624254865374	51.549676049275774	96	0.011125934322583988
25.96172260092184	24.065121938270785	50.02684453919262	105	0.010054844983128778
31.229304172199953	36.10246602612707	67.33177019832702	72	0.012488750126652614
28.016301673811846	34.01475011493631	62.03105178874816	72	0.012039306897987245
19.609145302492898	33.269871955596024	52.87901725808892	54	0.01237924168919854
25.1503234144009	38.69952685267512	63.84985026707602	60	0.012039455147803267
33.26150131519212	25.183046860767544	58.44454817595966	90	0.01349572900376129
42.90154330824746	36.998878997509344	79.9004223057568	93	0.011943242668528947
36.8641607698338	29.128387845436663	65.99254861527047	102	0.011567424311616921
38.4895754793898	31.14618322056268	69.63575869995248	102	0.011380127011336295
36.54142507807137	27.943321657622402	64.48474673569378	105	0.01149004208525633
31.13888993487138	38.665518100149434	69.80440803502081	87	0.009796213776251594
37.35006846176496	38.62846927547771	75.97853773724268	84	0.011618183777388845
26.66117517549494	33.03549622800662	59.69667140350156	66	0.012933840538640141
29.89442019477925	31.00327251654482	60.89769271132407	63	0.015459794647232605
33.520208035245716	33.445908515365204	66.96611655061092	66	0.015175781394093235
38.42717537956465	36.93860068157719	75.36577606114184	102	0.010086081598974742
32.983324463782694	35.519377590686915	68.50270205446961	87	0.010891432116557747
26.30504054303389	37.329558953056214	63.634599496090104	78	0.009865294098685563
34.81604722654457	33.43776543391229	68.25381266045686	93	0.011069152672132347
41.49953208422184	30.605420377227446	72.10495246144929	108	0.011447325636862495
36.13135579071613	26.942968691605067	63.074324482321195	105	0.011687085984175236
26.974212608589085	29.8511084109153	56.825321019504386	81	0.01146604231528747
35.17841422117897	33.60900431087741	68.78741853205638	87	0.0118769760049509
26.26115220270112	38.38744625545534	64.64859845815646	72	0.010444229253941137
33.44804984341831	27.769372681246708	61.21742252466502	87	0.013108594446647713
51.56058533589499	32.61326306306842	84.17384839896341	111	0.012323543096555879
45.14520335352796	28.956324238286033	74.10152759181399	102	0.01329043929147451
38.7254246027324	37.284536927522495	76.0099615302549	99	0.010379909906816238
30.634840306096756	33.083848193630715	63.71868849972747	84	0.011257018087165335
33.71510466491513	27.777305621591836	61.49241028650697	114	0.010057032375150514
37.65359456697594	34.75898746707183	72.41258203404777	99	0.01069549835733913
33.02612229013581	38.118014457372475	71.14413674750828	81	0.011114467798005512
31.56424176248813	34.387005976725284	65.95124773921341	75	0.012527152615126474
33.73823631378765	31.20649142713327	64.94472774092092	87	0.012153635040209986
50.00803427940381	32.23615651774242	82.24419079714623	102	0.01324739251536872
37.948610305811535	41.115183854968	79.06379416077954	87	0.010843056431357072
29.72376666231757	29.130879175963766	58.854645838281336	90	0.011273411772447896
27.422023806056643	26.28410950545439	53.70613331151103	78	0.013216615352105922
28.82460273985876	30.765269203391753	59.589871943250515	72	0.01324672959210339
26.477861305724986	33.10250882058468	59.58037012630967	66	0.012846917026188261
21.798216881157657	36.14828350237796	57.946500383535614	60	0.011346573187943786
27.892360396048662	24.65998257610047	52.552342972149134	96	0.011370659435045151
28.0639139703689	27.992137688618165	56.056051658987066	87	0.011515499595309512
23.524176381174897	29.897530242711284	53.42170662388618	90	0.009304441704082662
26.038420990424434	27.954925723658917	53.99334671408335	87	0.010915852087213216
28.077597702777553	28.86078483281561	56.93838253559316	84	0.011670130690254006
24.583221272304257	26.146431690798813	50.72965296310307	81	0.011805126193519354
28.161141032765137	25.716685861575996	53.87782689434113	87	0.012264217580234472
24.551038280949857	22.46401257574571	47.01505085669557	108	0.009865805834245645
21.058077443762684	26.574228967724913	47.6323064114876	84	0.01002276873526262
26.719551366178024	25.878932377543272	52.598483743721296	81	0.012632630995798194
35.37266316342992	23.042819147360408	58.415482310790324	138	0.009724880840931215
22.27175084592168	24.00768595170627	46.27943679762795	81	0.01168981426510489
25.311937708838812	21.77718864202314	47.08912635086195	150	0.007417174914482177
23.243693986653607	23.840802247321225	47.08449623397483	105	0.009350660099875889
24.853368803153167	23.499843803944813	48.35321260709798	69	0.015086385194905644
61.25787157305406	24.025026758522415	85.28289833157648	162	0.011282212536728837
23.712490928527494	22.373551479425224	46.08604240795272	102	0.010220937268294582
24.31907143915591	24.299832968469335	48.618904407625244	93	0.010758827812050951
25.394836845501654	23.44054017506887	48.835377020570526	102	0.010381576650965764
24.341492580278995	21.01162617300323	45.353118753282224	99	0.011212262023611847
24.75531135014376	23.845770110639844	48.601081460783604	87	0.011807529203571879
17.654706679676202	41.910593893257165	59.56530057293337	51	0.009944258358848747
12.755140394534735	39.553051905298524	52.30819229983326	30	0.0134415965416734
38.303894808948215	27.679153212529176	65.98304802147739	99	0.01265955167660296
31.95405047789808	22.527444073644553	54.48149455154263	90	0.014156473813643438
26.560240644813298	25.584917304402325	52.14515794921562	99	0.0103761588296845
40.41591703033466	30.92124827452418	71.33716530485884	153	0.007882714561407407
22.15713324791916	28.66632985231985	50.82346310023901	108	0.0076494210685079
20.973987544715527	37.476416800493794	58.45040434520932	54	0.011874629343104579
26.868782327278993	27.11055883183912	53.979341159118114	63	0.015770674862672057
36.700207167199935	23.694450664890894	60.39465783209083	138	0.009781679194643208
27.219513059336695	27.50595283581671	54.725465895153405	114	0.008705863607177934
31.714010419392434	28.340587131884927	60.05459755127736	96	0.01128546927626162
28.67590214818617	26.33683456540361	55.01273671358978	90	0.011807596849581464
36.67478122305969	36.394644655385285	73.06942587844497	108	0.009310571234454069
24.26714059882265	29.238241689053737	53.50538228787639	78	0.011177275261368799
28.809258507696015	29.552724333690534	58.36198284138655	69	0.014228083584536937
29.539867832255887	29.834941272234005	59.37480910448989	87	0.011412046354917575
33.400809888258074	25.113772237967105	58.51458212622518	96	0.012711640104703725
21.948969309935862	31.104348566669117	53.05331787660498	54	0.014265309008843482
19.72554530884924	43.888297661072485	63.61384296992173	39	0.013730882862297938
42.24355138612579	24.83363365978667	67.07718504591246	84	0.017065794927859528
29.01036016708553	25.722389232934724	54.73274940002025	81	0.013449131795205696
30.57694617208032	25.306844417450534	55.883790589530854	87	0.013136807551235342
33.2000961841312	22.64398487095833	55.84408105508953	153	0.008511611188886374
25.989255584887506	23.85288293679862	49.842138521686124	108	0.009844465965225703
24.20206982367283	33.984417703019616	58.186487526692446	63	0.012314456440316462
26.87679299035073	28.5711755214764	55.44796851182713	69	0.013863394334568957
28.10522068185346	25.692897785355647	53.79811846720911	93	0.011464366693280915
22.03907660570628	25.908710160930344	47.947786766636625	81	0.010963296652964053
28.825088968603666	25.335494870935257	54.16058383953892	90	0.012178703133983022
26.052046931297358	23.847634709836417	49.899681641133775	93	0.011453596014439424
28.541228974095528	27.726364945886477	56.267593919982005	99	0.01031359382090912
26.79303006218432	24.607580131797604	51.400610193981926	96	0.011069611392522416
31.798083233971376	28.533125763570993	60.33120899754237	81	0.013336625833711443
28.76923345414492	24.624678197967004	53.393911652111925	90	0.012406337488181946
29.07313046583573	24.977158584015697	54.05028904985143	84	0.013258249628071712
28.235152316320146	25.10718221621036	53.34233453253051	84	0.01294262907384416
31.88994658569503	26.99997977646111	58.88992636215614	96	0.011719401488188673
25.188712937662935	27.846999510717353	53.03571244838029	81	0.011474595826219977
25.139600305325004	24.046259869949147	49.18586017527415	81	0.01274606316954423
22.905202270801464	27.586256016339984	50.49145828714145	75	0.011627862361269468
23.557560398126956	26.119818399863444	49.6773787979904	87	0.010660278000223178
23.228128127206798	26.17882904150351	49.406957168710306	66	0.013883539984954556
22.00041071571109	30.24381939411461	52.2442301098257	60	0.013143856156069764
28.366200960939995	28.712383792839677	57.07858475377967	75	0.013217019352687417
32.52663498422342	23.384335596584098	55.91097058080752	114	0.011031482021825582
36.264389792025405	27.601617305317767	63.86600709734317	132	0.00916890494273917
24.052218708822434	22.448995121928906	46.50121383075134	87	0.01207606331286555
37.93422148440058	26.16764320751497	64.10186469191555	105	0.012310307914704176
39.32095579474212	27.6346061660813	66.95556196082342	108	0.011821554187285538
29.255199986390753	26.0183262251667	55.27352621155745	93	0.011688822554793974
22.818078321361234	28.791332685791524	51.60941100715276	75	0.011226661285372906
23.161363411273236	30.01385958045747	53.175222991730706	63	0.013097227403736986
29.636569486292395	29.797364015583554	59.43393350187595	105	0.009486687194554286
25.35740127916251	31.286543031716853	56.64394431087936	120	0.007136495584407711
30.593332185211967	23.30774860831467	53.90108079352664	108	0.011199116166992127
25.585497685874515	22.566561876013985	48.1520595618885	108	0.010124174746673724
55.41640566231184	21.94667312537134	77.36307878768318	168	0.010819303278022151
19.572163294945675	32.4651920342461	52.037355329191776	54	0.012604701841431181
28.62556141936679	25.986271045136256	54.611832464503046	93	0.011521117636862999
35.914126380078514	30.987164817704926	66.90129119778344	99	0.011215790850244321
30.143031011493587	27.957451423090294	58.10048243458388	96	0.010992888449420564
31.99537896683176	40.26971913905434	72.2650981058861	51	0.016541247574851127
39.14139025020909	27.66378932367028	66.80517957387937	111	0.011459109690715367
28.762972223309458	25.724168116198516	54.487140339507974	90	0.012031015027763867
40.565433380714886	26.609145199524868	67.17457858023975	96	0.013916595833325954
26.988894936803145	28.76426461296742	55.753159549770565	108	0.0088405183202685
35.215775784498334	27.206069892901883	62.42184567740022	96	0.012480442197651669
34.50736686664419	27.152819395463165	61.66018626210736	87	0.013600428050651876
33.64712879444338	28.16390240504272	61.8110311994861	81	0.014000210931636552
29.458640965623637	28.597024453212967	58.055665418836604	81	0.012611997774118082
31.65791809910596	29.18743818016868	60.84535627927464	93	0.011395694316393234
24.22082199609723	30.498267811146704	54.71908980724393	69	0.012221984456477514
27.818977533835632	24.509743266610474	52.328720800446106	72	0.015197883605914685
24.831534512172702	41.56509061238025	66.39662512455295	69	0.00979329791338463
21.21467877697848	44.460116556556166	65.67479533353465	60	0.009380467814481132
23.01553510985934	27.582264516411794	50.59779962627113	81	0.010806589375279813
30.814627993264338	32.73918815292374	63.553816146188076	87	0.010999542627592894
21.100312779975546	32.02857900707614	53.128891787051685	93	0.007850933630972976
21.946549772505985	29.58712319765841	51.533672970164396	75	0.010673946584086082
25.108843996339782	27.05499712308338	52.16384111942316	69	0.013726884338944662
22.465573715054656	24.325557408432804	46.79113112348746	63	0.014980353025691404
25.91898265793831	27.000110156722815	52.91909281466113	87	0.011158885478213252
25.151558979280793	23.428522986053864	48.58008196533466	84	0.012524987136501992
47.60182596730601	26.74562527641315	74.34745124371916	285	0.0051753696588462145
26.489715523716875	24.94240182017856	51.432117343895435	99	0.01054615304761338
27.310506907395197	21.258501915397655	48.56900882279285	75	0.01589328147787472
26.76469521461297	23.747255836684644	50.511951051297615	72	0.015123110531319166
30.307477818579628	23.20752823294155	53.515006051521176	135	0.008928523098745866
27.973039647843784	26.216610703262972	54.189650351106756	96	0.010911834928729705
23.861842930180618	23.967718917173794	47.82956184735441	72	0.013844582854984529
21.592878565374	27.097558479015433	48.690437044389434	63	0.013420247322285216
23.801531407273668	26.806375900582285	50.60790730785595	72	0.012733147664365448
24.510219397476526	20.749788003631487	45.26000740110801	72	0.015626947551495865
30.5916893805606	20.429825547063448	51.02151492762405	96	0.0137544672002488
38.90798409733468	22.01114305741352	60.9191271547482	117	0.012552659859623292
30.785993227087268	22.60742038323042	53.39341361031769	81	0.01530698030952642
29.82565608955744	22.48649595833472	52.31215204789216	81	0.015038114275879767
29.688456579929532	25.449192874599344	55.137649454528876	87	0.012820894990092889
21.084786031351925	43.74204177334478	64.8268278046967	93	0.006102907690521036
19.618034990601302	35.27700257534582	54.89503756594712	81	0.00787589820585832
33.32003619476732	24.883513202496218	58.20354939726354	105	0.01167539949360171
26.092711091698376	25.052529992210154	51.14524108390853	105	0.009806130501901367
23.32250253924582	27.988521383876208	51.31102392312203	117	0.007473790964772342
45.255507916493706	33.83020423915132	79.08571215564503	117	0.010470984529695727
20.503628720512395	29.11315260733877	49.616781327851164	66	0.011653895077700198
29.387464354848362	23.79879945526661	53.18626381011497	102	0.011374165660557375
26.643745556028556	22.339751121895745	48.9834966779243	84	0.013484317269858843
29.324396086743477	26.946448589586275	56.27084467632975	108	0.009836041429405917
34.65389466386633	29.472888388812684	64.12678305267902	135	0.008307693198794827
23.919315905946906	24.15155995641886	48.07087586236577	102	0.009735752095865111
25.772075739103105	26.617849703562545	52.38992544266565	87	0.011228682524114013
25.61441142676454	26.33596055003087	51.95037197679541	75	0.013067999992160692
32.65129963753178	25.67495675431285	58.32625639184462	96	0.0123310795078406
27.429253323609167	23.827482394374414	51.25673571798358	84	0.013156131890659289
24.04178967981244	29.2770883013726	53.31887798118504	81	0.010677461001488633
21.339217641518275	27.37040948028727	48.709627121805546	90	0.009239888007009164
35.66438960753905	28.11678616091669	63.78117576845574	129	0.009160457317196738
25.151939799740493	24.24154100667162	49.393480806412114	102	0.010067051257226952
32.88403252117898	27.555082689450163	60.43911521062914	93	0.012184560043121252
25.85207320102528	28.479702637300225	54.331775838325505	84	0.011093596660546346
36.16158830978315	23.677998483216733	59.83958679299988	165	0.008106382296588284
39.40368401507997	21.283524291370043	60.68720830645001	153	0.009880100607486932
31.72724195078646	24.98994085009446	56.71718280088092	90	0.013138204306775389
27.490054676886718	21.437639010344416	48.927693687231134	99	0.012025305590748344
17.440593585765356	35.60275689285018	53.04335047861554	51	0.011278096974437
18.724972230268143	29.321818259271623	48.04679048953977	60	0.011874424903718803
37.01741541784043	26.74586615739689	63.76328157523732	111	0.011291981565557283
27.989122455075886	25.340368442229682	53.32949089730557	96	0.011182250568349586
31.83719716237081	22.994108680820016	54.831305843190826	114	0.010997680325078566
27.55128518725344	21.41285757842863	48.96414276568207	102	0.011698512632720665
26.904156394316527	27.944687193656417	54.848843587972944	81	0.012010952812610004
25.37305239571758	25.524337314931515	50.897389710649094	69	0.014430698029341127
30.88741971414759	27.470008042670138	58.35742775681773	102	0.010657440800167887
29.8883637748835	22.499282138143037	52.38764591302654	102	0.01195438885365814
34.46996631079383	35.293765974328785	69.76373228512261	87	0.0112995844326069
28.282739869002395	25.41870937343337	53.701449242435764	96	0.011240315030695357
35.90744737164901	27.250107042942137	63.15755441459115	87	0.013939004726763302
30.436943857050842	38.94207237951472	69.37901623656556	81	0.010286045950904541
29.045872479946492	29.790020025890545	58.83589250583704	96	0.010227785814729714
29.705435006654085	25.949547903832176	55.65498291048626	105	0.010483823399522009
22.164211384712946	30.65550815514641	52.819719539859356	69	0.011375801764575508
23.15339765596557	26.7749029264412	49.92830058240677	87	0.010333062733659613
24.881096520148017	26.756510673857765	51.63760719400578	90	0.01053924626768928
27.36289767607647	33.91518254194518	61.27808021802165	87	0.009809653355107036
26.994112313300967	30.50088308632793	57.4949953996289	84	0.01088792107221906
26.270230059015542	30.18669602539317	56.456926084408714	75	0.012043169597319802
25.930010549180448	24.00699996426027	49.93701051344072	87	0.012145452049553685
39.83919159148415	23.113995613590482	62.953187205074634	102	0.014171693599759581
35.273407592191205	24.744661803451653	60.018069395642854	120	0.010652329900549328
24.591614037379554	25.300128460705313	49.89174249808487	99	0.009895518656626206
32.073217984869	21.747404547966426	53.82062253283542	153	0.008544548014314235
40.08430893005669	25.31418701897422	65.39849594903092	156	0.008777636568651855
32.07859755501529	25.383895840430487	57.462493395445776	102	0.011555951850564494
25.796371558100088	26.729134417382493	52.52550597548258	78	0.012494936352984895
28.692357163861786	31.513815855694013	60.2061730195558	75	0.012452359494925878
19.944789621129924	28.889487286117184	48.83427690724711	51	0.01484999087772546
30.49694095551161	30.004460376880054	60.501401332391666	81	0.012491254010957017
28.542440459879845	27.313877159186557	55.8563176190664	90	0.01146762609911813
38.372386126013424	26.723508713062955	65.09589483907638	144	0.008919841135970878
37.919573856732	25.09188502357151	63.011458880303515	132	0.010063586024026712
31.768075110154236	32.46583088186156	64.23390599201579	96	0.010254300997609402
27.971945645254017	26.62881552352657	54.600761168780586	96	0.010790966728192651
19.810106886249702	29.539418945368826	49.34952583161853	54	0.013711014350559459
21.764122146118176	35.03605716323777	56.80017930935595	57	0.012229036069133227
33.49634151838281	34.66632941799296	68.16267093637578	96	0.010160903967114592
43.28007350026547	27.986535526201006	71.26660902646648	150	0.008989955831289295
28.343040904471145	25.009044991157403	53.35208589562855	102	0.010716614802591652
27.08624254286081	21.592364770613116	48.678607313473925	90	0.013030740434387754
21.81177267324661	25.28881792445218	47.10059059769879	69	0.013003558657167555
32.8423393384843	39.499699404274715	72.34203874275902	69	0.012652066409775864
21.930366160119128	28.306124491678645	50.23649065179777	66	0.012539718918343686
21.46678207976113	34.69285512386961	56.159637203630744	51	0.01362539295096157
20.36557384707892	35.93865596552486	56.30422981260378	51	0.012700134349526819
36.694538593596434	23.9161665579622	60.61070515155863	135	0.009937677509577655
28.610179510294742	22.46375172237211	51.07393123266685	135	0.00877769047372023
41.970327098213254	36.65762569763017	78.62795279584343	111	0.009918278792702686
29.834722854264246	31.44054371634633	61.275266570610576	93	0.010351383745682433
28.742661336115127	27.151151977843433	55.89381331395856	78	0.013354810188439729
29.885414852100617	33.25281408095572	63.13822893305634	84	0.01101234947854984
30.844043753546245	27.096746117009083	57.94078987055533	84	0.01305309207822118
32.13333162626299	37.72936858026204	69.86270020652503	75	0.011851125974854859
32.41390381666951	38.15861241925149	70.572516235921	72	0.012320801927645331
38.99253874631803	32.609495279349815	71.60203402566785	96	0.011819879787694536
60.72863774212498	35.32660066279794	96.05523840492292	153	0.00943208733825364
35.65304122188616	31.899880699848204	67.55292192173437	102	0.010612422984343214
39.906962671485644	35.991807204596	75.89876987608164	117	0.009200068029150176
40.73100942563296	29.58689044215353	70.3178998677865	111	0.011251656799927527
22.66359442725234	37.20528771884099	59.868882146093334	48	0.01429788869143549
26.13134125018398	27.169103722980644	53.30044497316462	69	0.014089573966713832
35.325173958357496	21.67499501212277	57.00016897048027	108	0.012916060504960957
32.2134256455483	22.199158036788702	54.412583682337	99	0.013065003780535945
35.1054823595233	23.778297176716848	58.88377953624015	117	0.01118140916191029
23.756946567699174	23.340137773541564	47.09708434124074	81	0.012504008296120252
24.80639996349499	28.209294005772882	53.01569396926787	69	0.013192013574249366
25.296072028961326	24.802189324960267	50.09826135392159	84	0.012074917392403885
27.850868129649857	26.823592884105995	54.67446101375585	75	0.013698194683337057
21.06529636036658	28.529801097429463	49.595097457796044	75	0.010636371019503262
33.266898132912374	26.856729616942047	60.12362774985442	87	0.013363775000895051
29.820814610511665	25.192919819477122	55.01373442998879	114	0.009883978080506235
31.727987493552472	22.292894874486297	54.02088236803877	96	0.013301387842390546
39.447391984809144	22.881201068555452	62.3285930533646	123	0.011753913526460833
25.45967461907429	31.042713844740167	56.502388463814455	75	0.011520762221815046
26.377944520173788	27.938318921010282	54.31626344118407	72	0.013321375296848325
25.515099175019504	25.72422416423581	51.239323339255314	69	0.014407592134209389
30.786826865170354	28.97034404549968	59.757170910670034	87	0.012006149773050248
27.411857203929618	22.53067593490653	49.94253313883615	120	0.00956982001792466
29.484135434334785	25.674254802241624	55.15839023657641	84	0.013134023220470243
24.27796741118809	26.254923308538142	50.53289071972623	75	0.012595129730186092
24.2769062727761	31.124275395275657	55.401181668051755	87	0.009561798828753661
31.350237759562408	30.34789707921563	61.69813483877804	168	0.006093037658347412
29.463130102426145	23.804062930363987	53.26719303279013	108	0.010759624275181717
28.077638566218212	25.845265360164092	53.922903926382304	102	0.010401942917758254
27.38163370592	26.713941882976894	54.09557558889689	87	0.011700203773208311
23.317462142885685	26.03548241035846	49.35294455324414	105	0.008787209756200842
29.929644298263042	28.10308167167831	58.03272596994135	129	0.008109599681154395
43.107679011271145	25.371291732462378	68.47897074373353	102	0.014043765141225018
24.437700338475217	30.75382899433326	55.19152933280848	69	0.012227258241529385
33.47187393637357	30.729379455445923	64.20125339181949	90	0.011810920327729558
20.8197950023803	25.740874551177694	46.56066955355799	78	0.010962188903350557
20.712058031712772	23.867611549841484	44.579669581554256	84	0.01073013954204959
25.747977551203302	26.045379759783497	51.7933573109868	84	0.011806423881879606
34.43791213649439	30.383163806472865	64.82107594296725	102	0.010717557468620948
25.12644947278207	21.75437323667584	46.88082270945791	108	0.010256411441250484
24.909828790571858	23.523244353682543	48.4330731442544	105	0.00992290947332947
26.669491428049717	21.672726028735177	48.342217456784894	105	0.011022885921715287
28.304472459936584	20.58824237222739	48.892714832163975	114	0.010945603889663074
20.856874967244273	28.39367410955589	49.25054907680016	60	0.013242837741509294
28.450822151428426	23.084841336375206	51.53566348780363	81	0.014304016405193494
24.57299879564443	31.347775871272844	55.920774666917275	54	0.01546335665100373
24.84769896351215	31.170582550230776	56.01828151374293	57	0.014837063303471825
29.902323796601493	31.284122907623335	61.18644670422483	132	0.007331677749274077
25.406077231794875	26.072753668699924	51.4788309004948	99	0.009913498273012696
29.51918512386059	25.575026975727905	55.094212099588496	81	0.013668703744768232
35.59434211872566	25.25374794091616	60.84809005964182	105	0.012082994889650993
25.233825848851122	28.727580662423936	53.96140651127506	63	0.014436372279687082
18.716596480853077	33.73389085362605	52.45048733447913	54	0.011791804621921477
35.20786504237538	26.153799183498343	61.361664225873724	90	0.013670189771328119
29.579584036095877	23.943459791704722	53.5230438278006	81	0.014327512705662394
21.49643548941868	25.039784088225105	46.536219577643784	69	0.012958433249500011
25.06004105978064	27.16334849066177	52.22338955044241	75	0.012573796847643778
21.514273670562737	39.159497361377	60.67377103193974	60	0.01052851223824687
21.790112769803514	34.08982207279241	55.87993484259592	60	0.011883154483059715
22.72255961129326	22.067791822650232	44.79035143394349	93	0.010981136666437658
29.050128310726627	31.663914068855576	60.7140423795822	84	0.01118084082972045
21.227937403463326	28.351948987992106	49.57988639145543	69	0.011685609454368374
23.34248882210582	28.203896032650107	51.54638485475593	66	0.013181466392010984
26.2266272392699	26.076526806624674	52.30315404589457	75	0.013388616289694379
21.469728998669297	24.931805660323526	46.40153465899282	78	0.011489553188906883
26.15946768878105	25.76808464882108	51.92755233760213	84	0.012034701415195635
25.92096879982638	24.612796930757778	50.53376573058416	99	0.01048322304315864
25.829477851091394	22.18181068108677	48.01128853217816	102	0.010921534505178987
23.090988188029257	30.879730924154195	53.97071911218345	81	0.009944650970208758
24.002334111540367	28.00842322309033	52.010757334630696	96	0.009301554982867905
31.01508944223027	26.841848957185086	57.856938399415355	108	0.010259314165759145
26.895072691184144	24.357075288407376	51.25214797959152	102	0.01052227018994765
33.863926510055734	20.369808147014638	54.23373465707037	126	0.011212366100430466
32.209561054460075	22.794304468038256	55.00386552249833	105	0.012103424976821434
31.171643267854286	24.76278329238631	55.934426560240595	87	0.013512218705747325
29.85660291744588	25.331687725548324	55.188290642994204	96	0.011702281265097914
30.395257394984892	27.461415585768986	57.85667298075388	96	0.011198722588512634
35.032210618003305	23.258789376657944	58.29099999466125	105	0.01262378233638605
25.656785388131976	28.162933851566553	53.81971923969853	72	0.01297690599290059
33.91054088990728	30.718318795988765	64.62885968589605	93	0.011538486848423433
29.76309585910432	27.988586567072712	57.751682426177034	87	0.012011774065122887
25.55311378446961	27.35422910863973	52.90734289310934	75	0.012689387548481914
26.643221268692827	29.08154761455164	55.724768883244465	78	0.012028393354656866
31.320744865620053	31.55632401393807	62.877068879558124	87	0.01143223918906627
32.60723898594506	31.52476723541203	64.13200622135709	87	0.01177653817091469
26.462721797751527	29.741093944772217	56.203815742523744	84	0.010931075786450457
29.99313321113343	23.717540888383557	53.710674099516986	111	0.010623913458709996
24.398024781740073	23.805422423026098	48.20344720476617	78	0.013049308885275218
34.35842632769196	23.704842968896262	58.063269296588224	117	0.011046529660107454
31.01525970587084	22.492997530200434	53.50825723607127	108	0.01157671857766843
36.08982032845971	23.20400136615461	59.29382169461432	102	0.013269688010782063
38.296750102122246	24.830283668701792	63.127033770824035	105	0.012820544948337875
30.645552461993653	26.997538615381195	57.64309107737485	84	0.013027616899105258
19.51718969833965	29.910135051579488	49.42732474991914	48	0.015097383296699273
31.291148594317562	26.521611170513587	57.81275976483115	93	0.012088381956664776
28.493697856189193	30.843771864917294	59.33746972110649	78	0.012102105207529692
25.896525446002876	31.01287087859498	56.90939632459786	72	0.012163886010095345
30.38275111071398	29.08796411313025	59.47071522384423	81	0.012737741995459177
39.232635173260675	26.293475545287063	65.52611071854774	132	0.009980038254012906
33.930962625208394	27.410949249260128	61.34191187446852	90	0.012912453805886154
33.71099327966573	27.505489077338073	61.2164823570038	87	0.013266673456421452
35.384048930781	26.63526615894198	62.01931508972298	93	0.013111611787180589
37.66972437416359	29.88282795830814	67.55255233247173	90	0.013074373288056107
36.12708287097636	28.431426936449405	64.55850980742576	96	0.012324174684393502
36.13411069954934	27.75062496864523	63.884735668194566	93	0.01293495697501045
27.74442428852913	29.455586870143257	57.20001115867239	66	0.014507183803781482
33.448143099112436	27.840790593274946	61.28893369238738	54	0.021081970834149942
33.387919469710624	27.594768579309058	60.98268804901968	99	0.011555605632064517
22.75400425519223	34.31195579429949	57.06596004949172	63	0.01164950903970336
38.385718020899034	34.51271364000053	72.89843166089956	147	0.007338502471522739
24.131300653834366	33.27270269733945	57.40400335117381	84	0.009366813031937751
36.55451856222899	29.14089287833464	65.69541144056363	96	0.012216120055361324
36.00590040742338	29.12106540917353	65.12696581659691	108	0.010751776635646191
52.68417384560623	28.9668871582628	81.65106100386903	99	0.0151016866149447
22.369187873649878	36.27475151106129	58.64393938471117	48	0.014437839325756548
25.857716785632157	38.04506240166702	63.902779187299174	48	0.015586863497008769
26.65235478790172	29.262663749711948	55.91501853761367	78	0.011976599159376055
27.411042180738594	26.494586651308335	53.90562883204693	69	0.014851279819105905
23.69069742119783	31.822479882495767	55.513177303693595	51	0.015740862764439333
25.703571296279303	30.08541167291187	55.788982969191174	57	0.015630107953942887
25.725798559544625	27.099496121285792	52.82529468083042	75	0.012839505110205185
28.800976872709267	26.659137162279617	55.460114034988884	72	0.014678062433832247
32.3238233575601	27.09326705990934	59.417090417469446	90	0.012588262083318397
35.59004112734432	28.85442929896374	64.44447042630806	126	0.009200506179125559
27.12506203242057	30.493702119277696	57.618764151698265	93	0.009871262408840353
12.190708925425952	46.86264077721957	59.05334970264552	21	0.015884792475133965
11.214279242923169	42.30990862807427	53.52418787099744	24	0.014133142938230247
34.81717470942898	28.3903560091607	63.20753071858969	72	0.016037437708551254
25.684605105458825	29.19331929625969	54.877924401718516	81	0.011241822980396237
28.829508934098506	26.141219990538666	54.97072892463717	78	0.013747912023161502
22.828510470315205	31.25559062178497	54.08410109210018	78	0.010142183177428422
22.410174577799076	33.2149298978987	55.625104475697775	66	0.011271276835296582
33.567304453700416	25.679897427731785	59.2472018814322	102	0.011824584120117767
26.723054989684208	26.34829225847993	53.07134724816414	78	0.012951586090038658
33.37570070364527	26.108531563657714	59.484232267302986	102	0.011646921375243775
32.31377635085582	26.850633830778804	59.16441018163462	120	0.009498112099727172
26.57507808512329	26.872233461622574	53.447311546745865	84	0.01180953745387753
29.746952924420867	25.923490855640175	55.67044378006104	84	0.013126804514842529
28.36965786150098	27.841843875652263	56.21150173715324	87	0.011650696538301291
26.064451378101264	24.747707775889754	50.81215915399102	78	0.013306139308214875
24.837164671203436	25.662005932449336	50.49917060365277	93	0.010501352115361254
24.330476739191013	25.711865553808785	50.0423422929998	90	0.010674611420347146
26.794751708758547	25.473855355182536	52.26860706394108	90	0.011521415455134182
33.86581793373402	22.72855050362736	56.59436843736138	111	0.011857232621368997
25.868309275952114	33.478450204588604	59.34675948054072	171	0.004830038085473965
32.4483858284516	26.55193693085417	59.00032275930577	96	0.01199901811489486
37.61886425881791	23.906095806631505	61.52496006544941	129	0.010572040921425963
26.923731295154717	29.298182283010142	56.22191357816486	81	0.011608906155268989
31.378017834263982	27.027757780471834	58.405775614735816	81	0.013724311234213266
34.77508523569442	31.227861156898197	66.00294639259262	87	0.012410306527392223
31.228608470963266	26.730567894231918	57.959176365195184	114	0.009794268467835966
30.56317849254653	25.696327917118982	56.25950640966551	87	0.012994651570306253
20.572444878292796	28.904181092557774	49.47662597085057	69	0.011238680016641753
27.9056768494664	25.3642142634074	53.2698911128738	78	0.013724690548853715
42.2046298086763	31.793316230012937	73.99794603868924	96	0.01269543458850086
26.60182958551948	25.344894966680382	51.94672455219986	99	0.010457955546985373
22.723193803688535	29.74377798994652	52.466971793635054	87	0.009411742737484397
23.968255523581117	28.79531963827299	52.76357516185411	78	0.011201384431893667
17.7456136226704	29.598229049063253	47.343842671733654	57	0.01188887631184061
32.10766513917555	23.515763902964398	55.623429042139946	96	0.012938171743610376
27.236923748336746	26.789895729595475	54.02681947793222	93	0.01088157836549401
31.046302488772465	29.52605286649195	60.57235535526441	117	0.008860435950472496
26.500973852554736	30.41095735043895	56.911931202993685	84	0.010763570259195783
31.02082458221261	28.670097396632272	59.690921978844884	90	0.0117551636890686
31.14592346281124	26.909499528766467	58.05542299157771	117	0.009481327152561437
27.483900372265023	29.72526327287395	57.20916364513897	84	0.011244722209735464
35.457653959982636	29.57750695958953	65.03516091957216	117	0.009715550935653206
29.682594032145513	29.739783325214166	59.42237735735968	84	0.011888240344646014
25.073243255301662	26.4666453405574	51.53988859585906	84	0.011446596126595142
25.295711363643903	31.569444908219445	56.86515627186335	81	0.010481679361007239
29.412197079751703	30.412293470592797	59.8244905503445	84	0.011620018908645979
27.15879419538345	28.033972121114196	55.19276631649765	84	0.011634559797383976
29.613057738334653	24.681708246811688	54.29476598514634	96	0.011847613339297439
27.906437185317273	24.958971407198298	52.86540859251557	96	0.01127880784165253
36.65515045928966	31.960022723566784	68.61517318285644	117	0.009421018865980737
31.135595459850325	26.02722888461287	57.162824344463196	90	0.012611727595462486
38.48028864906344	27.810438562883025	66.29072721194646	207	0.006054012481206634
28.177001528133054	30.85699445677259	59.033995984905644	162	0.005777459590035463
44.98594047936183	26.62123570547772	71.60717618483955	78	0.018301623538306118
25.869348265847833	25.607254368240156	51.47660263408799	102	0.00987612026585685
36.204954513855874	26.81584150203353	63.0207960158894	111	0.011105787839534911
32.71813117299159	28.62375727611321	61.3418884491048	102	0.010780975713656186
23.95407481524265	31.79033338438545	55.7444081996281	81	0.01000294996854827
33.80172132141875	23.99464765193199	57.796368973350745	90	0.014091847010855557
31.278956975540094	26.67069621967185	57.949653195211944	84	0.0133279112072357
27.922012384149173	27.39806144996049	55.320073834109664	72	0.01407957309881339
29.7807528061244	31.460987663589787	61.24174046971419	75	0.012812684292474846
32.99314276651414	28.18877646470802	61.18191923122216	81	0.013802277837773104
26.03806153945277	28.122197049696943	54.16025858914971	81	0.011673152068928704
25.926718795997758	28.638045312822953	54.56476410882071	102	0.009118005766554797
29.807211976333477	32.13083993342646	61.938051909759935	93	0.010181368955875396
26.834969122004452	29.13113140064268	55.96610052264713	72	0.013083215225050142
26.072201003926878	30.4160442638221	56.48824526774898	78	0.011450232683866763
24.173062672209976	27.586333140141203	51.75939581235118	87	0.010435253733906583
22.706331567070993	27.628963208864004	50.335294775935	57	0.015182262066663996
22.332638449542614	31.409379137842024	53.74201758738464	57	0.013593948391320002
27.136989186289416	28.053832711652834	55.19082189794225	108	0.009039171157986204
25.620876476336235	28.029068598165807	53.64994507450204	108	0.008672711938557622
28.712446384008256	21.57760874390966	50.29005512791792	87	0.014031472900953882
28.10892927529437	25.853599596742267	53.962528872036636	75	0.01415457064833591
24.412440752976714	27.72783957655794	52.140280329534654	69	0.013203813431257412
23.800851002542206	25.281123037490406	49.08197404003261	75	0.012761769626265875
27.476348078878324	26.296026311296288	53.77237439017461	93	0.011096993247951542
24.724128844964564	24.39726396240439	49.121392807368956	75	0.013461761367851769
23.98662490246329	29.15117030919089	53.13779521165418	66	0.013124008569228887
24.864680181327284	24.896234909927283	49.76091509125457	90	0.011100949315444508
33.96873036942735	23.040064576615435	57.008794946042784	117	0.011171279877666154
43.92780262582714	20.49266248684883	64.42046511267597	114	0.014494838945958502
27.760485068711198	24.883765308800086	52.644250377511284	114	0.009483080430273825
23.859055367114355	26.250397540248667	50.10945290736302	99	0.00942165166895926
30.41288801838498	22.012858479025123	52.4257464974101	105	0.01192313333989683
71.84498506855401	27.446085497124567	99.29107056567858	141	0.01315647929093924
36.43831160213224	26.760763689058656	63.199075291190894	96	0.012914418352305852
26.669762594270058	26.529731397722582	53.19949399199264	84	0.011950029221487756
35.70827670152626	23.657177155406895	59.36545385693316	111	0.011958069369348267
28.99456058451424	30.60103516242284	59.59559574693708	105	0.009158335803060531
28.330212675357984	28.968928956044543	57.29914163140253	96	0.010250074800443177
27.42295795497978	28.79645143682005	56.21940939179983	81	0.011915768607392274
43.365622757833094	25.123461273088072	68.48908403092116	132	0.010960900205149626
26.656867412380425	28.221477904468752	54.87834531684918	111	0.008643634605219486
31.182448296128904	30.81488269703886	61.997330993167765	117	0.008620331701682837
34.77567053993869	24.39233279964668	59.16800333958537	138	0.00926369182688966
33.88848686646385	28.952381117805515	62.840867984269366	96	0.01164605316515202
29.14102421130661	29.659312524180027	58.80033673548664	90	0.01097043621367475
21.572105419720188	36.95288197901853	58.524987398738716	45	0.014741462960704709
19.578435793551442	32.21241662289013	51.790852416441574	48	0.01427250845500285
22.603952070100235	28.434154051669864	51.0381061217701	57	0.014806138819155676
18.82147426073347	30.549093251631003	49.370567512364474	48	0.014427534787863325
22.96903418465996	24.857551543155964	47.826585727815925	72	0.013112897283654328
27.57757117991901	30.53721062068175	58.11478180060076	75	0.012377825069536144
31.844512673048257	28.724822341568903	60.56933501461716	87	0.012371144852816538
29.252375536158898	23.030816920027707	52.283192456186605	96	0.01232064219286976
22.966794324423464	28.447231916073218	51.41402624049668	69	0.01237498141431125
29.368346172343447	31.720877816148363	61.08922398849181	69	0.013702684327618557
23.212551884861163	40.01125129606651	63.223803180927675	51	0.012942393616425702
18.11266491497733	28.08093493569016	46.19359985066749	54	0.013298185357030312
23.58193060293504	32.71171542289069	56.29364602582573	66	0.011866131430902276
22.812106345892087	29.63955657638063	52.45166292227272	60	0.013724410804517992
32.53296992874784	22.58889194452791	55.12186187327575	102	0.012617756035016409
33.71347048511133	21.586391837532346	55.299862322643676	99	0.013708623953795695
35.02126814713631	28.1066459643794	63.12791411151571	108	0.010808951651615304
35.9773541867626	28.32082112324662	64.29817531000921	105	0.01126585430031352
23.529099584806456	31.779828372939708	55.308927957746164	69	0.011585522397353465
20.24403433507848	31.807574353270468	52.05160868834895	60	0.011842873258850892
31.041200091754227	28.566506009311837	59.607706101066064	90	0.011790825164556028
24.386925669644285	29.037142881475134	53.42406855111942	90	0.009773226042344131
35.52127024100036	32.13746840505831	67.65873864605867	99	0.010848686814833867
25.27622035962833	29.959093761231596	55.235314120859925	81	0.010896258640775525
32.593262971783304	31.257823079608134	63.85108605139144	90	0.011449931692962797
28.059047775766892	25.829629072466304	53.888676848233196	90	0.011788391537051421
42.30209625998742	27.523720810557972	69.8258170705454	123	0.010919390533063903
28.455588534514952	32.79051853083032	61.24610706534527	78	0.01155563372232429
29.49443748777623	34.044557781741645	63.538995269517876	90	0.010002423150958771
23.820367157507974	26.724845871645023	50.545213029153	78	0.011787087667720346
40.97098476109612	30.33006439931962	71.30104916041574	78	0.01580993261754753
28.67428270476057	26.717519931218803	55.391802635979374	99	0.010625115094694122
26.559386251214338	24.65964941001148	51.21903566122582	99	0.01065179597605944
33.55731956943693	30.593315463951413	64.15063503338834	90	0.011869412037835217
25.426842359412404	35.1669034664535	60.5937458258659	72	0.010902091474674254
29.61287933125692	26.746782469328956	56.359661800585876	105	0.010240929551606423
31.06855018090835	27.717175779122112	58.78572596003046	87	0.012467650889082936
43.32344290141005	25.52656123427582	68.85000413568586	126	0.011360774129414357
30.86476608895432	23.632061192529306	54.496827281483625	123	0.009800217674890633
37.078487476055514	25.761745733140305	62.840233209195816	114	0.011284720827585951
32.5484495552315	30.172971666974306	62.721421222205805	90	0.011730016211514396
32.93746237676628	28.24449415090195	61.18195652766823	105	0.010620348386697535
41.794351484420744	26.693625688261097	68.48797717268184	120	0.011327962299179881
33.35356090461861	36.13643672419517	69.48999762881378	54	0.01746946439029112
23.91490095791025	31.982898793778773	55.89779975168902	57	0.014131417409931532
22.30185393715293	29.390860508038234	51.692714445191164	60	0.0135765560488895
32.11287193178315	30.350720915645457	62.46359284742861	117	0.008899869822479138
32.36660811995763	27.407630401878684	59.77423852183632	105	0.010713773758335012
23.70946620050926	38.90639843967444	62.6158646401837	69	0.009949576736968052
25.42242697640283	31.20105540241715	56.62348237881998	72	0.011941745115166939
34.11571943673951	31.476212418970515	65.59193185571003	102	0.010384866836119921
37.48363158823696	31.28926967286576	68.77290126110272	105	0.010820687845122974
33.592064122957765	27.498009766908392	61.09007388986616	99	0.011632432135568038
29.7510419712576	31.60211867704424	61.35316064830184	102	0.009383493960997268
23.877058535507054	31.948044860141813	55.82510339564887	69	0.011669367732535373
23.531900810020907	27.75221518073618	51.28411599075709	63	0.014062049576984169
20.96444203363005	36.8304521991546	57.79489423278465	48	0.013542561166049424
31.300259004627517	28.117637754977512	59.41789675960503	78	0.01383874543489147
33.97413348118123	26.34096397841738	60.315097459598604	102	0.011717755140707867
36.303340461846744	29.121195504106115	65.42453596595286	102	0.011448649053567381
34.58750891652308	27.638237283143575	62.22574619966665	93	0.012589742146952496
35.97273517681943	29.001418496126888	64.97415367294631	90	0.012930471898323763
31.161844533847045	32.516090651928536	63.67793518577558	78	0.012431278725828575
38.62084238912829	25.4094395884511	64.03028197757939	117	0.011396494073494405
44.20845380197361	32.53343765209623	76.74189145406984	132	0.009379477654029165
30.976045810847356	29.46696088464962	60.443006695496976	84	0.012339013742223702
34.670970987622155	30.544585138354744	65.2155561259769	96	0.011398953038183684
28.780566642965372	29.737376762183505	58.51794340514888	78	0.01252053435209321
27.330856028339074	28.77924149553181	56.110097523870884	75	0.012843091351472487
23.19934851428546	35.761640634132824	58.960989148418285	57	0.01265522461924214
35.72920897797745	28.05064564817528	63.77985462615273	93	0.012742654098806877
23.549387544214564	30.74615820414444	54.295545748359004	84	0.009766996360786024
28.116186186770136	31.107568812480807	59.22375499925094	72	0.012901532206802126
30.065085477278117	27.392304929833642	57.45739040711176	81	0.013194096336468257
25.574634211636152	28.735595761524266	54.31022997316042	78	0.0117741668214905
31.917634775440437	28.209774689769016	60.12740946520945	84	0.012997948326674797
26.8440959175639	26.320560720724114	53.164656638288015	81	0.012521941363600486
38.857022798338804	22.79909418313043	61.65611698146923	96	0.01495070340246992
24.628821758141456	29.968518260659508	54.59734001880096	63	0.013736236676610815
34.911566115919825	29.74919873192283	64.66076484784266	156	0.007179742060377738
38.22465631846029	24.436861344162175	62.661517662622465	174	0.007807590310649392
30.324082301891913	25.630210499193694	55.95429280108561	75	0.015018713216796703
27.71981204775662	29.74814276065682	57.46795480841344	84	0.011309025073424725
33.0618690560416	28.511235693328608	61.57310474937021	84	0.013223449389023648
25.86132669067833	30.44427667670315	56.30560336738148	114	0.007781644436266343
26.47130203877264	28.9244336870499	55.39573572582254	114	0.008223563256199764
21.319642467962073	31.70167260088805	53.02131506885012	57	0.013017780585951823
23.50641468808616	32.06537006213226	55.57178475021842	63	0.01259264313620252
27.798609158313187	25.86445002542273	53.66305918373592	93	0.011322137486365808
24.193542362075434	23.744149650498066	47.9376920125735	81	0.012513436560727472
31.930918781215475	25.089500886588326	57.0204196678038	63	0.018799918832472822
26.376441976085758	33.38197804852294	59.7584200246087	72	0.011667674452371407
21.649145910230672	24.96506867360081	46.61421458383148	75	0.012011454447671085
28.14388334563803	27.882508606220412	56.02639195185844	96	0.010486939793030644
26.745720102647763	23.079018765179317	49.82473886782708	102	0.010885101536152119
26.674843015774677	29.45153088530482	56.126373901079496	93	0.01000361536086909
26.210870191471447	27.82739821859565	54.0382684100671	84	0.011398516891197544
23.35915648836272	22.83841403570827	46.19757052407099	87	0.011682235800679284
29.835275567680885	20.666836854626172	50.50211242230706	102	0.012637511172195418
18.580102840921633	40.46260790761326	59.042710748534894	60	0.009086160859125796
12.825289850918288	35.58619590964966	48.41148576056795	42	0.010572182179971393
18.178483241847918	31.448433284376446	49.62691652622436	78	0.008437624005240849
21.53673512215088	28.954104880583216	50.490840002734096	69	0.01162686641864903
21.30420784452864	24.06864120782987	45.37284905235851	72	0.012703813268229235
18.368614055173488	33.655130923708164	52.02374497888165	54	0.011635996070447492
22.122658920485396	24.51170828568385	46.634367206169244	75	0.012372300110580787
35.5527803697058	22.231324193099375	57.784104562805176	111	0.012415124343049736
36.4406430353042	24.91979385006536	61.36043688536956	126	0.010317592231601955
23.067233500886157	22.369926533988068	45.437160034874225	90	0.0113590238478035
31.75996171028777	21.0494599924359	52.80942170272367	114	0.01164045719744595
27.072902727287694	23.06545136110623	50.138354088393925	84	0.013335489436529242
28.000155890550726	21.95738713705008	49.957543027600806	81	0.014641927617432455
26.140124114770988	20.90002524170161	47.0401493564726	90	0.013004310623997366
26.942643728027967	20.3587918035019	47.30143553152987	105	0.011583162105194755
17.986419048917057	33.808584048201446	51.7950030971185	54	0.011396728255781743
17.2634835434529	27.541538923058972	44.80502246651187	60	0.011700854789915612
23.145944349592497	25.933723844955274	49.07966819454777	90	0.01022551240866063
23.96545424562568	24.12197860230045	48.08743284792613	102	0.009757957459679143
19.582531451528354	23.10157753854547	42.684108990073824	66	0.013419813509700559
25.79800781117793	22.294080076228436	48.092087887406365	75	0.0147885185401314
22.439023547326254	22.37834834620323	44.81737189352948	78	0.012845570388765529
25.726812444436767	21.183662124786203	46.91047456922297	99	0.011585435143158098
28.00034238356208	20.16938100071467	48.16972338427675	114	0.011017191499917997
30.25910384864414	21.253091074656655	51.5121949233008	102	0.012521973828518636
35.06893201051041	26.926988322765855	61.99592033327627	165	0.007291638802219739
29.584953826009496	21.823088852362723	51.40804267837222	117	0.010565288612339144
26.043036262984284	24.303387892361354	50.34642415534564	87	0.012077377875881076
26.02626716486611	22.76347774943721	48.78974491430332	84	0.013093535172940967
34.98612927520388	22.567355468302917	57.5534847435068	90	0.015007399060420092
35.127521073209365	24.102188920000824	59.229709993210186	111	0.011686097718439873
30.569396033763443	24.10530758604742	54.67470361981086	90	0.013128029510729625
37.79973573740771	24.538496785046526	62.338232522454234	126	0.01067516172839492
34.26476425840984	29.379441839087534	63.644206097497374	171	0.00652176722718469
24.383776510225807	33.72686110321314	58.110637613438946	84	0.009344097963657698
23.993215504108328	28.315152993493207	52.308368497601535	90	0.009838527198533733
27.231209569798658	34.94881238320234	62.180021953000995	63	0.013193772931624808
22.644083720559028	29.17250303150259	51.81658675206162	75	0.011050730793808007
22.45115981269649	29.90974020720163	52.36090001989812	72	0.011220479392280946
25.847462749968013	26.396097532473366	52.24356028244138	108	0.009119708917786457
24.766712713295643	26.21169077172851	50.97840348502415	84	0.011424711613382443
26.61357829558741	25.70084662516171	52.31442492074912	84	0.012207058549275868
24.7317178893816	25.89197721450285	50.62369510388445	75	0.012897435686794908
25.015155106380572	27.835983459703495	52.85113856608407	84	0.011011708291567428
29.60575468877892	22.417240263493706	52.022994952272626	102	0.011907262501985767
25.58368099600633	24.369263873041803	49.95294486904813	69	0.015007348689393957
35.708030497143724	24.60795736675231	60.315987863896034	120	0.010778462973095771
29.054114844161262	28.06715230948847	57.12126715364973	93	0.011023067615809562
24.149932407807597	23.221510625559375	47.37144303336697	99	0.010389452458725542
27.502566262427678	27.766889566572367	55.269455829000044	72	0.01379328933261888
34.56303135978037	23.57475598846215	58.13778734824252	102	0.01276699340238437
40.08804091433133	25.972286764983227	66.06032767931455	117	0.011511205830853941
29.529694390166885	26.64953540573988	56.179229795906764	99	0.0108679440766296
25.437083085344888	29.948246359945507	55.385329445290395	78	0.01137220969247717
21.841263580844206	26.325850787472838	48.167114368317044	75	0.011620911200741805
28.561558234174687	27.662755042727458	56.224313276902144	90	0.01136943653028109
27.94384953114831	27.692212283351402	55.63606181449971	93	0.010823010644352449
35.39181368858574	24.331950153259633	59.723763841845376	111	0.01167074895847271
27.798168755562926	30.95113377884406	58.749302534406986	111	0.00832954473980354
33.56045178505114	29.309380682608026	62.86983246765917	111	0.009918967882870352
31.388000093220885	29.34650502686745	60.734505120088336	90	0.011659196557124593
26.062195926394555	31.379916554657196	57.44211248105175	54	0.01615309797284861
27.66674888883712	32.490702066427566	60.157450955264686	69	0.012879949551819347
26.22870217433412	28.015836178251515	54.244538352585636	69	0.013815004831396534
37.74653342163235	26.489395735566912	64.23592915719927	78	0.01638417350574263
27.808351832961367	27.913215171677468	55.721567004638835	75	0.013297166931569248
23.209741770382866	29.02393569983217	52.233677470215035	63	0.013456144670877237
26.8392935152224	33.74857599025244	60.58786950547484	111	0.007605426545245352
35.43052774273393	29.886837153662626	65.31736489639655	171	0.006596236028585304
27.973142101568392	30.24577155920403	58.21891366077242	75	0.012596726077993992
26.009726736009693	24.73535396654	50.74508070254969	75	0.013822579032351736
42.427442785354316	26.347751100812918	68.77519388616723	96	0.014418838282199179
21.046693900428416	30.37408873688512	51.420782637313536	78	0.009737313358037732
24.37315535312059	29.328673285534382	53.70182863865497	84	0.010388802435456342
17.495235691002485	34.76050697774093	52.255742668743416	45	0.013069788171131498
20.59422970611226	35.78992403282613	56.38415373893839	51	0.012857574148301845
25.957284082379072	22.64028988310847	48.59757396548754	84	0.013118950769565488
35.58308506252287	24.165372257566954	59.74845732008982	165	0.0079149105741869
32.25679989853062	23.274645782674334	55.53144568120496	135	0.009292931432304663
23.445183621953994	26.047556117147195	49.49273973910119	66	0.014031346775652745
41.526288366359246	21.351829095672407	62.87811746203165	72	0.021641643912358274
29.751870214357705	23.51995147194842	53.271821686306126	84	0.014041518246673034
27.659079658430954	23.526390409090304	51.18547006752126	96	0.011681816085781881
47.365622630862994	24.76865315972075	72.13427579058374	132	0.011683102433004638
42.48254599873381	24.432731184406865	66.91527718314067	141	0.01030865590294735
23.895123852738397	28.70763754974279	52.602761402481185	78	0.011201332375035894
22.37427987691739	22.22736084198909	44.60164071890648	69	0.014561740892183478
16.891465267604374	41.60197947141097	58.493444739015345	39	0.012605712262457781
25.10277260497433	30.71678796944941	55.81956057442374	63	0.013678466741906058
18.23770615759001	36.69043323944435	54.928139397034364	63	0.009240341011289848
30.900125568700954	23.414257444679674	54.31438301338063	87	0.013953413837530022
26.1965740758349	25.62434558136103	51.82091965719593	90	0.011289105098079939
29.331145244806564	26.18007154699638	55.511216791802944	75	0.01445747035939521
36.50050638517746	27.187844499796768	63.68835088497423	69	0.017798083181384355
29.668365996818913	24.80170552019726	54.47007151701617	87	0.013046257800389876
34.177801167427205	27.586473557012713	61.76427472443992	132	0.008809178484915232
42.18643779799491	27.04163831583014	69.22807611382505	120	0.011301455796469842
48.721624637688194	23.40546920523866	72.12709384292685	135	0.012027374880612616
29.198906409564437	25.014414858170852	54.21332126773529	93	0.011998792348849147
31.36478555254819	22.427787775765843	53.792573328314035	96	0.01314708002922349
24.1888867473387	23.419078581855793	47.60796532919449	84	0.012184745926247619
34.046240276966614	28.45310684182435	62.499347118790965	102	0.01112995027223742
32.743468233894575	23.656615191694836	56.40008342558941	93	0.01347799602359503
23.197573580842402	34.99038796053697	58.18796154137937	72	0.010191139518040675
25.99732004138007	33.71450044771327	59.71182048909334	87	0.009478704976260334
34.02449496666436	32.52030663190088	66.54480159856524	99	0.010434193013603908
58.15098208316791	34.768025570503035	92.91900765367095	114	0.012440461456262868
61.17409519950388	26.769380178995295	87.94347537849917	168	0.010214242925643924
41.30328595545291	28.379766444428075	69.68305239988098	138	0.009390906555328312
42.63547095621874	27.436510039448265	70.071980995667	117	0.011561886346955595
40.40371178906972	29.34627575519973	69.74998754426944	135	0.009251966905994762
33.85623188067377	32.266882016925315	66.12311389759908	87	0.011897706791124488
24.625876910242724	37.43371061248644	62.05958752272917	60	0.012155267429205873
20.645332386316674	31.915331019533205	52.56066340584988	57	0.0126269100674414
36.13879628573544	31.136217642327935	67.27501392806337	111	0.010013307070598455
37.152043192332336	34.14813898515822	71.30018217749056	126	0.008429355608032818
32.09722379750214	49.1158835180517	81.21310731555384	66	0.010992771780220763
25.0606013138622	40.5508441302162	65.6114454440784	57	0.012179220312489
23.195590528373877	32.37028180601698	55.56587233439086	63	0.01237347856455848
28.458075774661523	30.309550093387536	58.76762586804906	90	0.010613879769756357
25.829184772581264	38.82951283330329	64.65869760588456	93	0.007910654207046917
40.66139475369207	36.70481505537709	77.36620980906916	99	0.010866002673981787
34.55786184602211	29.425329075539427	63.98319092156153	90	0.012451493262715323
29.36019178449567	29.529572569618544	58.88976435411421	126	0.00790362243269664
25.416867521332296	29.888823614527144	55.30569113585944	93	0.009546471296767722
26.865687947981847	29.620093220144042	56.48578116812589	69	0.013497269145773845
35.07960227793164	43.29251629694264	78.37211857487428	69	0.012409026665061008
43.921380993261764	25.569782497413836	69.4911634906756	99	0.014569592397980594
34.2104316609267	28.50808886810775	62.71852052903445	84	0.013541907157646261
31.017317592765274	26.290722356581924	57.3080399493472	90	0.012490930804735558
31.745595560497716	27.004003697687825	58.74959925818554	93	0.012058125690635087
18.867313924186682	29.212601148029428	48.07991507221611	60	0.011980725389559669
23.441320276704626	26.454570329340346	49.89589060604497	75	0.01220538686771535
[truncated: 937 more rows]
