# Supplementary material for: Initiation of chromosome replication controls both division and replication cycles in E. coli through a double-adder mechanism
Source: eLife journal article supplement (doi:10.7554/elife.48063), 2019-11-11
Supplement: supp [file elife-48063-supp-v1.zip › elife_poa_e48063_Figure_7_figure_supplement_3.pdf]

| A | Experimental (Glycerol)<br>Initiation centric     |          | B | Simulation (Glycerol)<br>Initiation centric       |          | C | Experimental (Glycerol)<br>Division centric |          | D | Simulation (Glycerol)<br>division centric |          |
|---|---------------------------------------------------|----------|---|---------------------------------------------------|----------|---|---------------------------------------------|----------|---|-------------------------------------------|----------|
|   | combinations                                      | <i>I</i> |   | combinations                                      | <i>I</i> |   | combinations                                | <i>I</i> |   | combinations                              | <i>I</i> |
|   | $\Lambda_i, \alpha, d\Lambda_{if}, d\Lambda_{ib}$ | 0.882    |   | $\Lambda_i, \alpha, d\Lambda_{if}, d\Lambda_{ib}$ | 0.98     |   | $T_{bi}, \lambda, dL, L_i$                  | 0.522    |   | $L_b, \lambda, dL, dL_{bi}$               | 0.429    |
|   | $\Lambda_f, \alpha, R_{if}, d\Lambda_{ib}$        | 0.804    |   | $\Lambda_f, \alpha, R_{if}, d\Lambda_{ib}$        | 0.874    |   | $L_b, \lambda, dL, dL_{bi}$                 | 0.519    |   | $L_b, T_{bi}, \lambda, dL$                | 0.392    |
|   | $\Lambda_i, \alpha, R_{if}, d\Lambda_{ib}$        | 0.682    |   | $\Lambda_i, \alpha, R_{if}, d\Lambda_{ib}$        | 0.766    |   | $\lambda, dL, L_i, dL_{bi}$                 | 0.483    |   | $L_d, \lambda, R_{db}, dL_{bi}$           | 0.371    |
|   | $\Lambda_i, T_{ib}, \alpha, d\Lambda_{if}$        | 0.629    |   | $T_{ib}, \alpha, d\Lambda_{if}, \Lambda_b$        | 0.696    |   | $L_d, \lambda, R_{db}, dL_{bi}$             | 0.481    |   | $L_b, L_d, \lambda, dL_{bi}$              | 0.345    |
|   | $T_{ib}, \alpha, d\Lambda_{if}, \Lambda_b$        | 0.61     |   | $\alpha, d\Lambda_{if}, \Lambda_b, d\Lambda_{ib}$ | 0.694    |   | $L_b, \lambda, dL, L_i$                     | 0.457    |   | $L_d, T_{bi}, \lambda, R_{db}$            | 0.328    |
|   | $\Lambda_f, T_{ib}, \alpha, R_{if}$               | 0.571    |   | $\Lambda_f, T_{if}, \alpha, d\Lambda_{ib}$        | 0.618    |   | $L_b, T_{bi}, \lambda, dL$                  | 0.428    |   | $L_b, L_d, T_{bi}, \lambda$               | 0.315    |
|   | $\Lambda_f, T_{if}, \alpha, d\Lambda_{ib}$        | 0.553    |   | $\alpha, R_{if}, \Lambda_b, d\Lambda_{ib}$        | 0.588    |   | $L_d, \lambda, R_{db}, L_i$                 | 0.406    |   | $T_{bi}, \lambda, dL, L_i$                | 0.31     |
|   | $\Lambda_i, T_{if}, d\Lambda_{if}, d\Lambda_{ib}$ | 0.535    |   | $\Lambda_i, \Lambda_f, \alpha, d\Lambda_{ib}$     | 0.588    |   | $L_d, T_{bi}, \lambda, R_{db}$              | 0.377    |   | $L_b, \lambda, R_{db}, dL_{bi}$           | 0.299    |
|   | $\Lambda_i, \Lambda_f, \alpha, d\Lambda_{ib}$     | 0.506    |   | $T_{ib}, \alpha, R_{if}, \Lambda_b$               | 0.555    |   | $T_{bi}, \lambda, R_{db}, L_i$              | 0.373    |   | $L_b, \lambda, dL, L_i$                   | 0.294    |
|   | $T_{ib}, \alpha, R_{if}, \Lambda_b$               | 0.493    |   | $\Lambda_i, T_{if}, \alpha, d\Lambda_{ib}$        | 0.547    |   | $L_d, T_{bi}, \lambda, L_i$                 | 0.364    |   | $L_b, T_{bi}, \lambda, R_{db}$            | 0.256    |
|   | $\alpha, d\Lambda_{if}, \Lambda_b, d\Lambda_{ib}$ | 0.489    |   | $\Lambda_i, T_{ib}, \alpha, d\Lambda_{if}$        | 0.504    |   | $L_b, L_d, \lambda, dL_{bi}$                | 0.362    |   | $L_d, T_{bd}, \lambda, dL_{bi}$           | 0.25     |
|   | $\Lambda_f, T_{if}, R_{if}, d\Lambda_{ib}$        | 0.486    |   | $\Lambda_f, T_{ib}, \alpha, R_{if}$               | 0.448    |   | $L_b, \lambda, R_{db}, dL_{bi}$             | 0.356    |   | $L_d, \lambda, R_{db}, L_i$               | 0.247    |
|   | $\Lambda_i, T_{ib}, \alpha, R_{if}$               | 0.485    |   | $\Lambda_i, T_{ib}, d\Lambda_{if}, d\Lambda_{ib}$ | 0.43     |   | $L_d, \lambda, L_i, dL_{bi}$                | 0.337    |   | $L_d, T_{bi}, \lambda, L_i$               | 0.241    |
|   | $\Lambda_i, T_{if}, \alpha, d\Lambda_{ib}$        | 0.456    |   | $T_{if}, \alpha, \Lambda_b, d\Lambda_{ib}$        | 0.419    |   | $\lambda, R_{db}, L_i, dL_{bi}$             | 0.332    |   | $L_b, L_d, \lambda, L_i$                  | 0.237    |
|   | $\Lambda_i, \alpha, d\Lambda_{if}, \Lambda_b$     | 0.437    |   | $\Lambda_f, T_{ib}, \alpha, \Lambda_b$            | 0.419    |   | $L_b, L_d, \lambda, L_i$                    | 0.319    |   | $\lambda, dL, L_i, dL_{bi}$               | 0.226    |
|   | $\Lambda_i, T_{ib}, d\Lambda_{if}, d\Lambda_{ib}$ | 0.416    |   | $\Lambda_f, \alpha, \Lambda_b, d\Lambda_{ib}$     | 0.411    |   | $L_b, \lambda, R_{db}, L_i$                 | 0.314    |   | $T_{bi}, \lambda, R_{db}, L_i$            | 0.216    |
|   | $\Lambda_i, T_{if}, R_{if}, d\Lambda_{ib}$        | 0.414    |   | $\Lambda_i, T_{ib}, \alpha, R_{if}$               | 0.393    |   | $L_d, T_{bd}, \lambda, dL_{bi}$             | 0.3      |   | $L_d, T_{bd}, T_{bi}, \lambda$            | 0.209    |
|   | $\Lambda_f, \alpha, R_{if}, \Lambda_b$            | 0.405    |   | $T_{if}, T_{ib}, \alpha, \Lambda_b$               | 0.391    |   | $L_b, L_d, T_{bi}, \lambda$                 | 0.298    |   | $L_b, T_{bd}, \lambda, dL_{bi}$           | 0.207    |
|   | $\alpha, R_{if}, \Lambda_b, d\Lambda_{ib}$        | 0.401    |   | $\Lambda_f, T_{ib}, R_{if}, d\Lambda_{ib}$        | 0.381    |   | $L_b, T_{bi}, \lambda, R_{db}$              | 0.281    |   | $L_b, \lambda, R_{db}, L_i$               | 0.205    |
|   | $\Lambda_f, T_{ib}, R_{if}, d\Lambda_{ib}$        | 0.377    |   | $T_{ib}, d\Lambda_{if}, \Lambda_b, d\Lambda_{ib}$ | 0.349    |   | $L_b, T_{bd}, dL, dL_{bi}$                  | 0.251    |   | $L_d, \lambda, L_i, dL_{bi}$              | 0.182    |
|   | $\Lambda_f, T_{if}, T_{ib}, \alpha$               | 0.371    |   | $\Lambda_i, T_{ib}, R_{if}, d\Lambda_{ib}$        | 0.335    |   | $L_d, T_{bd}, R_{db}, dL_{bi}$              | 0.236    |   | $L_b, T_{bd}, dL, dL_{bi}$                | 0.171    |
|   | $\Lambda_f, T_{ib}, \alpha, \Lambda_b$            | 0.366    |   | $\Lambda_i, \alpha, d\Lambda_{if}, \Lambda_b$     | 0.326    |   | $T_{bd}, dL, L_i, dL_{bi}$                  | 0.233    |   | $L_d, T_{bd}, \lambda, L_i$               | 0.17     |
|   | $\Lambda_i, \Lambda_f, T_{ib}, \alpha$            | 0.361    |   | $\Lambda_i, T_{if}, d\Lambda_{if}, d\Lambda_{ib}$ | 0.326    |   | $L_d, T_{bd}, T_{bi}, \lambda$              | 0.226    |   | $L_b, T_{bd}, T_{bi}, \lambda$            | 0.164    |
|   | $\Lambda_i, T_{if}, T_{ib}, d\Lambda_{if}$        | 0.346    |   | $\Lambda_f, T_{if}, T_{ib}, \alpha$               | 0.311    |   | $L_b, T_{bd}, \lambda, dL_{bi}$             | 0.222    |   | $\lambda, R_{db}, L_i, dL_{bi}$           | 0.158    |
|   | $\Lambda_i, \alpha, R_{if}, \Lambda_b$            | 0.338    |   | $\Lambda_i, \Lambda_f, T_{ib}, \alpha$            | 0.302    |   | $L_b, T_{bd}, dL, L_i$                      | 0.221    |   | $L_b, T_{bd}, T_{bi}, dL$                 | 0.15     |
|   | $\Lambda_f, \alpha, \Lambda_b, d\Lambda_{ib}$     | 0.333    |   | $\Lambda_f, \alpha, R_{if}, \Lambda_b$            | 0.3      |   | $L_d, T_{bd}, \lambda, L_i$                 | 0.213    |   | $L_d, T_{bd}, R_{db}, dL_{bi}$            | 0.145    |
|   | $\Lambda_i, T_{ib}, R_{if}, d\Lambda_{ib}$        | 0.323    |   | $T_{ib}, R_{if}, \Lambda_b, d\Lambda_{ib}$        | 0.29     |   | $T_{bd}, T_{bi}, \lambda, L_i$              | 0.211    |   | $L_d, \lambda, dL, dL_{bi}$               | 0.143    |
|   | $\Lambda_i, T_{if}, T_{ib}, \alpha$               | 0.317    |   | $\Lambda_f, \alpha, d\Lambda_{if}, d\Lambda_{ib}$ | 0.288    |   | $T_{bd}, \lambda, L_i, dL_{bi}$             | 0.207    |   | $L_b, T_{bd}, \lambda, L_i$               | 0.142    |
|   | $\Lambda_f, T_{if}, T_{ib}, R_{if}$               | 0.316    |   | $\Lambda_f, T_{if}, R_{if}, d\Lambda_{ib}$        | 0.285    |   | $L_b, T_{bd}, T_{bi}, dL$                   | 0.206    |   | $L_b, L_d, T_{bd}, dL_{bi}$               | 0.138    |
|   | $T_{if}, T_{ib}, \alpha, \Lambda_b$               | 0.312    |   | $\Lambda_i, T_{if}, T_{ib}, \alpha$               | 0.279    |   | $L_d, T_{bd}, R_{db}, L_i$                  | 0.2      |   | $T_{bd}, T_{bi}, \lambda, L_i$            | 0.132    |
|   | $\Lambda_i, \Lambda_f, T_{if}, d\Lambda_{ib}$     | 0.307    |   | $\Lambda_i, \Lambda_f, T_{ib}, d\Lambda_{ib}$     | 0.258    |   | $L_b, T_{bd}, \lambda, L_i$                 | 0.196    |   | $L_d, T_{bi}, \lambda, dL$                | 0.13     |
|   | $\Lambda_f, T_{if}, \alpha, \Lambda_b$            | 0.299    |   | $\Lambda_i, \alpha, R_{if}, \Lambda_b$            | 0.255    |   | $L_d, T_{bd}, T_{bi}, R_{db}$               | 0.186    |   | $L_d, T_{bd}, T_{bi}, R_{db}$             | 0.123    |
|   | $\Lambda_f, \alpha, d\Lambda_{if}, d\Lambda_{ib}$ | 0.284    |   | $\Lambda_i, T_{if}, R_{if}, d\Lambda_{ib}$        | 0.25     |   | $L_d, \lambda, dL, dL_{bi}$                 | 0.185    |   | $L_b, L_d, T_{bd}, T_{bi}$                | 0.12     |
|   | $\Lambda_i, T_{if}, T_{ib}, d\Lambda_{ib}$        | 0.274    |   | $\Lambda_i, T_{if}, T_{ib}, d\Lambda_{ib}$        | 0.247    |   | $L_b, T_{bd}, R_{db}, dL_{bi}$              | 0.176    |   | $L_b, T_{bd}, dL, L_i$                    | 0.118    |
|   | $T_{if}, d\Lambda_{if}, \Lambda_b, d\Lambda_{ib}$ | 0.273    |   | $T_{if}, d\Lambda_{if}, \Lambda_b, d\Lambda_{ib}$ | 0.246    |   | $L_b, L_d, T_{bd}, dL_{bi}$                 | 0.175    |   | $L_b, T_{bd}, R_{db}, dL_{bi}$            | 0.117    |
|   | $T_{if}, \alpha, \Lambda_b, d\Lambda_{ib}$        | 0.271    |   | $\Lambda_f, T_{if}, \alpha, \Lambda_b$            | 0.219    |   | $L_b, T_{bd}, T_{bi}, \lambda$              | 0.165    |   | $T_{bd}, \lambda, L_i, dL_{bi}$           | 0.109    |
|   | $\Lambda_i, T_{if}, T_{ib}, R_{if}$               | 0.27     |   | $\Lambda_f, T_{ib}, \Lambda_b, d\Lambda_{ib}$     | 0.207    |   | $T_{bd}, R_{db}, L_i, dL_{bi}$              | 0.164    |   | $L_d, \lambda, dL, L_i$                   | 0.098    |
|   | $\Lambda_i, T_{if}, d\Lambda_{if}, \Lambda_b$     | 0.268    |   | $T_{if}, T_{ib}, \Lambda_b, d\Lambda_{ib}$        | 0.203    |   | $L_d, \lambda, dL, L_i$                     | 0.163    |   | $L_d, T_{bd}, R_{db}, L_i$                | 0.097    |
|   | $\Lambda_i, \Lambda_f, \alpha, \Lambda_b$         | 0.251    |   | $\Lambda_i, \Lambda_f, \alpha, \Lambda_b$         | 0.196    |   | $L_d, T_{bd}, L_i, dL_{bi}$                 | 0.163    |   | $L_b, T_{bd}, T_{bi}, R_{db}$             | 0.096    |
|   | $\Lambda_f, T_{if}, R_{if}, \Lambda_b$            | 0.247    |   | $\Lambda_i, \Lambda_f, T_{if}, d\Lambda_{ib}$     | 0.195    |   | $L_b, T_{bd}, R_{db}, L_i$                  | 0.155    |   | $L_b, L_d, T_{bd}, L_i$                   | 0.095    |
|   | $T_{if}, R_{if}, \Lambda_b, d\Lambda_{ib}$        | 0.241    |   | $T_{if}, R_{if}, \Lambda_b, d\Lambda_{ib}$        | 0.192    |   | $L_b, L_d, T_{bd}, L_i$                     | 0.154    |   | $T_{bd}, dL, L_i, dL_{bi}$                | 0.09     |
|   | $T_{ib}, d\Lambda_{if}, \Lambda_b, d\Lambda_{ib}$ | 0.24     |   | $\Lambda_i, T_{if}, \alpha, \Lambda_b$            | 0.182    |   | $L_d, T_{bi}, \lambda, dL$                  | 0.152    |   | $L_b, T_{bd}, R_{db}, L_i$                | 0.08     |
|   | $\Lambda_i, \Lambda_f, T_{ib}, d\Lambda_{ib}$     | 0.239    |   | $\Lambda_f, T_{if}, \Lambda_b, d\Lambda_{ib}$     | 0.171    |   | $L_b, L_d, T_{bd}, T_{bi}$                  | 0.144    |   | $L_d, T_{bd}, L_i, dL_{bi}$               | 0.073    |
|   | $\Lambda_i, T_{ib}, d\Lambda_{if}, \Lambda_b$     | 0.231    |   | $\Lambda_i, T_{if}, T_{ib}, d\Lambda_{if}$        | 0.165    |   | $L_b, T_{bd}, T_{bi}, R_{db}$               | 0.14     |   | $T_{bd}, R_{db}, L_i, dL_{bi}$            | 0.062    |
|   | $\Lambda_i, T_{if}, \alpha, \Lambda_b$            | 0.226    |   | $\Lambda_f, T_{ib}, \alpha, d\Lambda_{if}$        | 0.148    |   | $L_d, T_{bd}, dL, dL_{bi}$                  | 0.089    |   | $L_d, T_{bd}, dL, dL_{bi}$                | 0.057    |
|   | $\Lambda_f, T_{ib}, R_{if}, \Lambda_b$            | 0.215    |   | $\Lambda_f, T_{if}, T_{ib}, R_{if}$               | 0.144    |   | $L_d, T_{bd}, dL, L_i$                      | 0.079    |   | $L_d, T_{bd}, T_{bi}, dL$                 | 0.05     |
|   | $\Lambda_i, T_{if}, R_{if}, \Lambda_b$            | 0.207    |   | $\Lambda_i, T_{ib}, d\Lambda_{if}, \Lambda_b$     | 0.128    |   | $L_b, T_{bi}, dL, dL_{bi}$                  | 0.077    |   | $L_b, T_{bi}, dL, dL_{bi}$                | 0.039    |
|   | $T_{ib}, R_{if}, \Lambda_b, d\Lambda_{ib}$        | 0.206    |   | $\Lambda_i, T_{if}, T_{ib}, R_{if}$               | 0.128    |   | $L_d, T_{bd}, T_{bi}, dL$                   | 0.073    |   | $L_d, T_{bd}, dL, L_i$                    | 0.039    |
|   | $\Lambda_f, T_{ib}, \alpha, d\Lambda_{if}$        | 0.202    |   | $\Lambda_f, T_{ib}, d\Lambda_{if}, d\Lambda_{ib}$ | 0.126    |   | $T_{bi}, dL, L_i, dL_{bi}$                  | 0.072    |   | $L_d, T_{bi}, R_{db}, dL_{bi}$            | 0.032    |
|   | $\Lambda_f, T_{if}, \Lambda_b, d\Lambda_{ib}$     | 0.201    |   | $\Lambda_f, T_{ib}, R_{if}, \Lambda_b$            | 0.123    |   | $L_d, T_{bi}, R_{db}, dL_{bi}$              | 0.07     |   | $L_b, L_d, T_{bi}, dL_{bi}$               | 0.031    |
|   | $\Lambda_i, \Lambda_f, T_{if}, T_{ib}$            | 0.198    |   | $\Lambda_i, T_{if}, d\Lambda_{if}, \Lambda_b$     | 0.108    |   | $L_b, T_{bi}, dL, L_i$                      | 0.068    |   | $L_b, T_{bi}, R_{db}, dL_{bi}$            | 0.027    |
|   | $\Lambda_i, T_{ib}, R_{if}, \Lambda_b$            | 0.178    |   | $\Lambda_i, T_{ib}, R_{if}, \Lambda_b$            | 0.1      |   | $L_d, T_{bi}, R_{db}, L_i$                  | 0.06     |   | $L_b, T_{bi}, dL, L_i$                    | 0.027    |
|   | $\Lambda_f, T_{if}, d\Lambda_{if}, d\Lambda_{ib}$ | 0.172    |   | $\Lambda_i, \Lambda_f, T_{if}, T_{ib}$            | 0.099    |   | $L_b, L_d, T_{bi}, dL_{bi}$                 | 0.054    |   | $L_b, T_{bd}, T_{bi}, dL_{bi}$            | 0.024    |
|   | $\Lambda_f, T_{ib}, \Lambda_b, d\Lambda_{ib}$     | 0.155    |   | $\Lambda_f, T_{if}, R_{if}, \Lambda_b$            | 0.098    |   | $L_b, T_{bd}, T_{bi}, dL_{bi}$              | 0.054    |   | $L_b, L_d, T_{bi}, L_i$                   | 0.022    |
|   | $\Lambda_i, \Lambda_f, T_{if}, \Lambda_b$         | 0.154    |   | $\Lambda_f, \alpha, d\Lambda_{if}, \Lambda_b$     | 0.096    |   | $L_b, T_{bi}, R_{db}, dL_{bi}$              | 0.052    |   | $L_d, T_{bi}, R_{db}, L_i$                | 0.021    |
|   | $T_{if}, T_{ib}, \Lambda_b, d\Lambda_{ib}$        | 0.15     |   | $\Lambda_f, T_{if}, d\Lambda_{if}, d\Lambda_{ib}$ | 0.096    |   | $L_d, T_{bi}, L_i, dL_{bi}$                 | 0.05     |   | $T_{bi}, dL, L_i, dL_{bi}$                | 0.021    |
|   | $\Lambda_f, \alpha, d\Lambda_{if}, \Lambda_b$     | 0.141    |   | $\Lambda_i, T_{if}, R_{if}, \Lambda_b$            | 0.083    |   | $T_{bd}, T_{bi}, L_i, dL_{bi}$              | 0.05     |   | $L_b, T_{bi}, R_{db}, L_i$                | 0.019    |
|   | $\Lambda_f, T_{ib}, d\Lambda_{if}, d\Lambda_{ib}$ | 0.134    |   | $\Lambda_i, T_{if}, T_{ib}, \Lambda_b$            | 0.077    |   | $T_{bi}, R_{db}, L_i, dL_{bi}$              | 0.049    |   | $L_b, T_{bd}, T_{bi}, L_i$                | 0.017    |
|   | $\Lambda_i, T_{if}, T_{ib}, \Lambda_b$            | 0.132    |   | $\Lambda_i, \Lambda_f, T_{ib}, \Lambda_b$         | 0.077    |   | $L_b, L_d, T_{bi}, L_i$                     | 0.047    |   | $L_d, T_{bi}, L_i, dL_{bi}$               | 0.017    |
|   | $\Lambda_i, \Lambda_f, T_{ib}, \Lambda_b$         | 0.132    |   | $\Lambda_i, \Lambda_f, T_{if}, \Lambda_b$         | 0.065    |   | $L_b, T_{bd}, T_{bi}, L_i$                  | 0.047    |   | $T_{bi}, R_{db}, L_i, dL_{bi}$            | 0.014    |
|   | $\Lambda_f, T_{if}, T_{ib}, d\Lambda_{if}$        | 0.111    |   | $\Lambda_f, T_{if}, T_{ib}, d\Lambda_{if}$        | 0.049    |   | $L_b, T_{bi}, R_{db}, L_i$                  | 0.046    |   | $L_d, T_{bi}, dL, dL_{bi}$                | 0.013    |
|   | $\Lambda_f, T_{if}, d\Lambda_{if}, \Lambda_b$     | 0.086    |   | $\Lambda_f, T_{ib}, d\Lambda_{if}, \Lambda_b$     | 0.038    |   | $L_d, T_{bi}, dL, dL_{bi}$                  | 0.027    |   | $T_{bd}, T_{bi}, L_i, dL_{bi}$            | 0.013    |
|   | $\Lambda_f, T_{ib}, d\Lambda_{if}, \Lambda_b$     | 0.074    |   | $\Lambda_f, T_{if}, d\Lambda_{if}, \Lambda_b$     | 0.032    |   | $L_d, T_{bi}, dL, L_i$                      | 0.024    |   | $L_d, T_{bi}, dL, L_i$                    | 0.009    |
