# Supplementary material for: Initiation of chromosome replication controls both division and replication cycles in E. coli through a double-adder mechanism
Source: eLife journal article supplement (doi:10.7554/elife.48063), 2019-11-11
Supplement: supp [file elife-48063-supp-v1.zip › elife_poa_e48063_Figure_7_figure_supplement_4.pdf]

# Replication-centric

$T_{ib}, \Lambda_i, \alpha, d\Lambda_{if}$   
I: 0.993

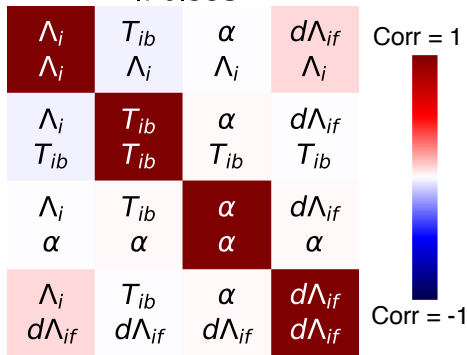

# Division-centric

$L_d, L_i, T_{bi}, \lambda$   
I: 0.27

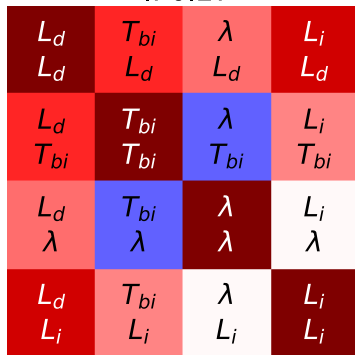

## Replication-centric

| Variables                                         | I     |
|---------------------------------------------------|-------|
| $\Lambda_i, T_{ib}, \alpha, d\Lambda_{if}$        | 0.993 |
| $\Lambda_f, T_{ib}, \alpha, R_{if}$               | 0.889 |
| $\Lambda_i, \alpha, d\Lambda_{if}, d\Lambda_{ib}$ | 0.805 |
| $\Lambda_i, T_{ib}, \alpha, R_{if}$               | 0.722 |
| $\Lambda_f, \alpha, R_{if}, d\Lambda_{ib}$        | 0.721 |

## Division-centric

| Variables                    | I     |
|------------------------------|-------|
| $L_d, T_{bi}, \lambda, L_i$  | 0.27  |
| $L_b, L_d, \lambda, L_i$     | 0.263 |
| $L_d, \lambda, L_i, dL_{bi}$ | 0.257 |
| $T_{bi}, \lambda, dL, L_i$   | 0.223 |
| $L_b, \lambda, R_{db}, L_i$  | 0.204 |
