# Supplementary material for: Initiation of chromosome replication controls both division and replication cycles in E. coli through a double-adder mechanism
Source: eLife journal article supplement (doi:10.7554/elife.48063), 2019-11-11
Supplement: supp [file elife-48063-supp-v1.zip › elife_poa_e48063_Figure_7_figure_supplement_5.pdf]

# Replication-centric

$\Lambda_i, \alpha, d\Lambda_{ib}, d\Lambda_{if},$   
I: 0.811

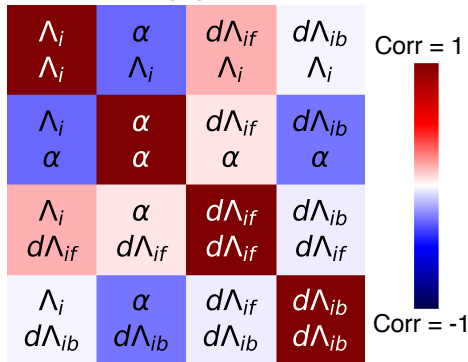

# Division-centric

$L_b, L_i, \lambda, dL,$   
I: 0.476

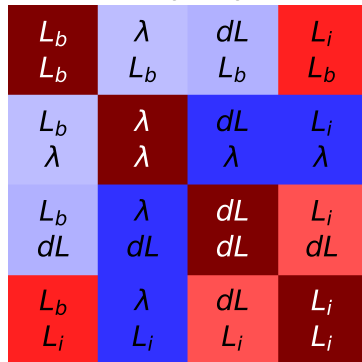

## Replication-centric

| Variables                                         | I     |
|---------------------------------------------------|-------|
| $\Lambda_i, \alpha, d\Lambda_{if}, d\Lambda_{ib}$ | 0.811 |
| $\Lambda_f, \alpha, R_{if}, d\Lambda_{ib}$        | 0.774 |
| $\Lambda_i, T_{if}, d\Lambda_{if}, d\Lambda_{ib}$ | 0.641 |
| $\Lambda_f, T_{if}, R_{if}, d\Lambda_{ib}$        | 0.61  |
| $\Lambda_i, \alpha, R_{if}, d\Lambda_{ib}$        | 0.608 |

## Division-centric

| Variables                   | I     |
|-----------------------------|-------|
| $L_b, \lambda, dL, L_i$     | 0.476 |
| $L_b, \lambda, dL, dL_{bi}$ | 0.421 |
| $\lambda, dL, L_i, dL_{bi}$ | 0.415 |
| $L_b, L_d, \lambda, L_i$    | 0.398 |
| $T_{bi}, \lambda, dL, L_i$  | 0.393 |
