# Supplementary material for: Initiation of chromosome replication controls both division and replication cycles in E. coli through a double-adder mechanism
Source: eLife journal article supplement (doi:10.7554/elife.48063), 2019-11-11
Supplement: supp [file elife-48063-supp-v1.zip › elife_poa_e48063_Figure_7_source_data_2.csv]

dLambda_if	dLambda_ib	Lambda_b	Lambda_f	Lambda_i	T_ib	T_if	R_if	alpha	data_type
1.0246375821042422	0.5395455008366696	1.6042397144253486	2.1338490643348833	1.1092114822306411	44.0	80.0	1.9237531332110631	0.011799045953357045	Simulations
1.25329556495493	0.5539738387554325	1.5738366775640877	2.270441863566655	1.017146298611725	50.0	90.0	2.2321684369942836	0.012871621060756242	Simulations
0.9768892267626491	0.6010370160490326	1.3895756058970257	1.862380148174388	0.8854909214117389	59.0	98.0	2.10321766507238	0.010944879228735828	Simulations
1.2729083552630316	0.49488576288326924	1.7551597286962557	2.511747383738923	1.2388390284758914	45.0	93.0	2.027501011837716	0.010964544456227717	Simulations
1.1498156003050382	0.6752133739137276	1.9521960874361919	2.3976988030227604	1.2478832027177222	47.0	70.0	1.9214128355930218	0.013459536148425584	Simulations
1.059959288869532	0.8288696789665381	1.8027250404075483	2.0147548293298243	0.9547955404602922	56.0	66.0	2.110142689144256	0.016323341790234498	Simulations
1.6214973734803984	0.7034168494796869	1.8660748373907097	2.750678209654266	1.1291808361738678	57.0	102.0	2.435994414300107	0.01259324338401191	Simulations
0.953582662848276	0.6035006529299534	2.01534095348732	2.300369959374605	1.346787296526329	46.0	60.0	1.708042513697436	0.01287239807539122	Simulations
1.2270546461324918	0.5596789760823018	1.7254987092137855	2.376616861332214	1.149562215199722	50.0	92.0	2.067410384499552	0.011389399941576263	Simulations
1.2492911529682724	0.7847920156054689	2.247320149027839	2.711514952000614	1.4622237990323417	46.0	68.0	1.854377526747286	0.013101985110319476	Simulations
1.0001720869215116	0.6446150157983732	1.8205736849259104	2.233358768132839	1.2331866812113275	45.0	69.0	1.8110467799887917	0.01241773640725289	Simulations
1.261873403746029	0.6827192459635484	1.7275300452838054	2.2938616465856048	1.0319882428395757	48.0	77.0	2.222759476671857	0.014965608360228713	Simulations
1.225877666205632	0.6468778747208204	2.032530273899117	2.571730791676688	1.3458531254710557	48.0	74.0	1.9108554588945716	0.012624576405010036	Simulations
1.0662140732285816	0.5457144406943552	1.4288586822747205	1.9490298945413984	0.8828158213128168	59.0	91.0	2.207742371045228	0.012555734384114767	Simulations
1.1510156584558386	0.6427206981069975	1.8559782672421565	2.311585262886097	1.1605696044302583	64.0	91.0	1.991767881962487	0.010923621180209281	Simulations
1.3144245662845706	0.5181355761747346	1.9012024552639342	2.744460447611051	1.4300358813264804	36.0	89.0	1.9191549550947837	0.010567092149785247	Simulations
1.3972057469091586	0.7308790070695494	1.6759505720323211	2.3603927992710108	0.9631870523618521	54.0	90.0	2.450606861339176	0.014368211759812595	Simulations
1.082800775825067	0.4695209536370526	1.419098853724693	2.0786494243868505	0.9958486485617833	43.0	92.0	2.0873146008571295	0.01153965283082414	Simulations
1.1170023037628072	0.4878415575995463	1.6011496153148024	2.257842078274396	1.1408397745115888	47.0	98.0	1.9791053298794856	0.010049473428972461	Simulations
0.9984326617519148	0.5869050292044204	1.6932297429053833	2.1249048404487825	1.1264721786968677	42.0	67.0	1.8863358373456927	0.013665470922435146	Simulations
0.7564508742160081	0.5908839409637886	1.4136684574560034	1.6450835272674382	0.8886326530514301	52.0	70.0	1.8512526200995092	0.012692882533982165	Simulations
0.7875940954060917	0.61036238797676	1.5519980415080956	1.7531586022583368	0.965564506852245	53.0	67.0	1.815682525420969	0.012843462201105297	Simulations
1.2203365885671662	0.7277360367905608	2.1181398402690284	2.6561087887862476	1.4357722002190814	48.0	76.0	1.8499513978477629	0.011677465376008963	Simulations
1.2288340681465815	0.5484536517267865	1.2625000322100144	2.0640709955944416	0.8352369274478602	58.0	134.0	2.471240108960929	0.009740561131620931	Simulations
0.733565985401887	0.6460116199341784	1.7542244685610344	1.7816080575093867	1.0480420721074997	65.0	66.0	1.6999394441549134	0.011598232652795252	Simulations
1.0973640991813758	0.7327179158427539	2.131611715640185	2.4519596877179524	1.3545955885365766	53.0	68.0	1.810104586540771	0.012589309670563244	Simulations
1.420189203207805	0.5960121227335058	1.7622523914886046	2.562309289215828	1.1421200860080232	53.0	93.0	2.243467495761937	0.01253473421326231	Simulations
1.216971906945017	0.5128041041110272	1.7859887513503074	2.4330263988822867	1.2160544919372698	51.0	87.0	2.000754419323994	0.011500506849380164	Simulations
0.8681119459960746	0.6899014042208731	1.584098590503148	1.8334911339032727	0.9653791879071981	56.0	73.0	1.8992445216040084	0.012677063832558625	Simulations
1.292596787620674	0.6395076803189674	1.6546099195913033	2.3269000808632807	1.0343032932426066	54.0	89.0	2.249727034676938	0.013143258045630504	Simulations
1.5672198004833975	0.4640226531602114	1.52059064147956	2.5429466746451697	0.9757268741617723	57.0	115.0	2.6062074766873313	0.012016973386940844	Simulations
1.4929889209103193	0.9892839892615208	2.2449150948216823	2.7976888605580728	1.3046999396477534	49.0	70.0	2.1443159270118466	0.015721678243480468	Simulations
1.0892628272434497	0.6905279638650961	1.7054782807277706	2.1820966602395613	1.0928338329961116	51.0	81.0	1.996732343340001	0.012316555016163478	Simulations
1.0835805843864006	0.7480761215401717	1.9067857862211717	2.2245443229817377	1.140963738595337	58.0	76.0	1.94970641724374	0.012674432924948792	Simulations
0.9165777851841834	0.6168509080302482	1.6961230564462881	2.063446834080981	1.1468690488967976	52.0	80.0	1.799200036016198	0.010591944938851076	Simulations
0.7966729145782174	0.5750816867707373	1.7642476169026926	1.9641693073760942	1.1674963927978768	54.0	67.0	1.6823771957607596	0.011201510446456345	Simulations
0.7456854684438754	0.43846949421839576	1.861624499702092	2.2013727731909274	1.455687304747052	29.0	51.0	1.5122566268264939	0.011700058484378016	Simulations
0.9782515392460884	0.7267434999310707	1.9039733957407752	2.2172711120235187	1.2390195727774302	52.0	70.0	1.7895367924279073	0.011994088650109263	Simulations
0.5154174242940277	0.45125212082973665	1.5699699644426286	1.6465231844927122	1.1311057601986845	47.0	53.0	1.455675713474832	0.01022054710490733	Simulations
1.3155232615817245	0.5371030120247569	1.5269554388673336	2.36128715828078	1.0457638966990555	48.0	107.0	2.2579543678397793	0.010981461030280552	Simulations
1.167634889383899	0.7009999745909059	1.6237646548764164	2.098885829357073	0.9312509399731739	62.0	91.0	2.2538348572486107	0.012883316597614252	Simulations
0.9234907810159605	0.5649376229683867	1.303848686919746	1.6645871601309508	0.7410963791149903	72.0	105.0	2.2461142801949507	0.011118393643628485	Simulations
0.8190349305341442	0.5517506591361925	1.6216055919978674	1.901699634264616	1.0826647037304717	50.0	73.0	1.7564991522417286	0.011132916167902313	Simulations
1.0760268134260615	0.6501253829819758	1.9747412199286853	2.3082107546765425	1.232183941250481	65.0	86.0	1.873268006020316	0.010529736265731069	Simulations
1.3030958994781021	0.8110875778071132	1.9266846793047137	2.4411979712859333	1.1381020718078312	47.0	69.0	2.1449727856203484	0.015955932516267077	Simulations
1.0605828875919798	0.5899330630417485	1.6554470167307322	2.173070017051326	1.1124871294593464	45.0	76.0	1.9533439619273696	0.012709815973466593	Simulations
0.8357507740876517	0.7767783881147314	1.8238766859218605	1.8909243939473783	1.0551736198597266	74.0	78.0	1.7920504818901324	0.01078988818652343	Simulations
0.7821748883357444	0.6775752899772798	1.8685885160990487	1.9648021486789797	1.1826272603432353	63.0	69.0	1.6613875010024146	0.010614327621089855	Simulations
1.4234543351779905	0.6574766564426637	1.926782053208567	2.6933784546032338	1.2699241194252433	52.0	96.0	2.1208971570854436	0.011298694436105127	Simulations
1.4193786433317093	0.6629437081246923	1.6908460227257096	2.5217735508921346	1.1023949075604254	54.0	109.0	2.2875410015025937	0.010952271580304776	Simulations
0.8297174718873319	0.8488640520656978	2.157219405922835	2.149908351819805	1.3201908799324733	57.0	55.0	1.628482959926046	0.012791429523294848	Simulations
0.9740939496168985	0.748580225004376	1.8755886147898075	2.125716824598655	1.1516228749817563	60.0	75.0	1.8458445648991906	0.011790414286149438	Simulations
1.2492020012197775	0.7087972009002022	1.9575457193485286	2.4598753463383103	1.2106733451185328	61.0	91.0	2.031824154927168	0.011239291745779442	Simulations
0.9891781506926159	0.6785997818191967	1.583722315956822	1.9412807645382133	0.9521026138455974	56.0	78.0	2.0389406943199835	0.013177177089656059	Simulations
1.1092754571224943	0.5814309865599888	1.6703207012992032	2.14315833930059	1.0338828821780957	64.0	100.0	2.0729217750327464	0.010516656751054655	Simulations
1.2561584587622776	0.5945867973883714	1.672564770048104	2.31260098625003	1.0564425274877522	62.0	105.0	2.1890457133995307	0.01076478173659626	Simulations
1.22009209820085	0.75944588687176	2.0717322951537342	2.4717407797326407	1.2516486815317907	55.0	75.0	1.9747879865999451	0.013089303649943042	Simulations
1.1799722206344674	0.4905272697539429	1.5622099879487528	2.223297152551829	1.0433249319173616	43.0	76.0	2.130972896876895	0.014362003211675262	Simulations
1.3289040692222438	0.7367718783176194	1.863156849586867	2.4052790876850363	1.0763750184627925	62.0	92.0	2.2346106574640654	0.012608950961588053	Simulations
1.0931231315366607	0.7052646176760995	1.9796182607928534	2.319222190396037	1.2260990588593763	48.0	64.0	1.8915455269605856	0.014368210945895962	Simulations
1.2169199375082809	0.6199154287369267	1.636832550115338	2.2249704631759384	1.0080505256676575	59.0	98.0	2.2072013321973953	0.011655288087443854	Simulations
1.2686913423902604	0.44293130671472625	1.896570842402298	2.6531121278889027	1.3844207854986423	40.0	85.0	1.9164058757853029	0.011040036964195537	Simulations
1.680797346068528	0.42714976481733435	1.652435060246221	2.817067021432664	1.136269675364136	48.0	109.0	2.4792239751799143	0.012017326711890904	Simulations
0.8893128059778659	0.7148107353750006	1.8593875831317273	2.049976419932096	1.16066361395423	63.0	75.0	1.766210636127459	0.010942098763981445	Simulations
1.3946093203363668	0.6696560498643693	2.026027098696315	2.6654434092517745	1.2708340889154077	52.0	84.0	2.097396845505297	0.01272142687571653	Simulations
1.1362028109465359	0.5222383310638321	1.5272670878870849	2.145227035743252	1.0090242247967163	44.0	78.0	2.1260411623669806	0.013950891400193979	Simulations
1.1441261313254572	0.5123871343068485	1.7144130111679101	2.398311832983013	1.2541857016575557	38.0	79.0	1.9122461927395267	0.01183883893043781	Simulations
0.8753970870605099	0.6945986084151285	1.7629202573901497	1.9803973963202213	1.1050003092597114	46.0	58.0	1.7922143367063645	0.014512813522022423	Simulations
1.2521677476058426	0.7324894947851328	1.8380667308379484	2.3461227367099635	1.093954989104121	54.0	77.0	2.144624559582006	0.01429513129859675	Simulations
0.7386760651739107	0.6421260847150172	1.5955134289762718	1.636970055733744	0.8982939905598334	65.0	67.0	1.8223099263010256	0.012921915581254158	Simulations
0.8478476687528196	0.8278338864279111	1.7783494848351649	1.9822172678635184	1.1343695991106988	55.0	55.0	1.7474174814077341	0.01464044233775529	Simulations
1.3215170466231883	0.6644851240759309	1.8580689382863214	2.533711457526318	1.2121944109031297	48.0	81.0	2.090185728243549	0.013131248666376147	Simulations
1.3155043517076794	0.7644429082181685	1.9754634929339283	2.5876531539390513	1.2721488022313718	43.0	69.0	2.034080564632267	0.014846040894482883	Simulations
1.2254143452628536	0.647212594428034	1.6901371676184969	2.3175455372666898	1.0921311920038361	49.0	85.0	2.122039507922551	0.01277001784066934	Simulations
1.9459968291731253	0.7134040325845248	2.315733225704767	3.4415815028143486	1.4955846736412233	60.0	116.0	2.301161253836138	0.010365190378750513	Simulations
1.0674274838668647	0.6579538858138985	1.7685235094356464	2.2237939095332013	1.1563664256663366	50.0	78.0	1.9230875786209183	0.012095185454047893	Simulations
1.0090159634083247	0.7082461308444251	1.5193394714393806	1.8283494825646944	0.8193335191563698	67.0	87.0	2.2315082195676093	0.01331056460508063	Simulations
1.4678940113478431	0.5927390554600978	1.7503885588055654	2.6183157050603865	1.1504216937125433	53.0	106.0	2.2759616924562507	0.011193172408687765	Simulations
1.0822963677358246	0.5835907641070943	1.715891934905522	2.190938560659133	1.1086421929233083	62.0	91.0	1.9762359529921785	0.010799507780221915	Simulations
0.916294220030252	0.5258300404643599	1.351480986020388	1.7995252962710044	0.8832310762407525	56.0	93.0	2.0374343075995744	0.0110403606849245	Simulations
0.7274645591034381	0.6674828910785643	1.6646046091622158	1.6872348373781272	0.9597702782746891	80.0	81.0	1.7579569565450073	0.01004814502006251	Simulations
2.1801584509595067	0.7977546726716713	1.9845362408504699	3.219688313941018	1.0395298629815117	83.0	143.0	3.097254276761726	0.011405523283200332	Simulations
0.9841483691841126	0.5232850546029264	1.5026968972652766	2.0002260918741497	1.016077722690037	58.0	106.0	1.9685758748637925	0.009218418107506465	Simulations
1.1032291437232753	0.5391986712411976	1.6006000123861779	2.1918167865950395	1.0885876428717642	43.0	79.0	2.013449997294555	0.012780628409452877	Simulations
1.2190587597596156	0.5270078526219344	1.6571614958532481	2.3011513389963625	1.0820925792367468	50.0	83.0	2.1265752886129925	0.013114842561401515	Simulations
1.0885958047037065	0.7862176046852211	1.711982530502234	2.045007819740388	0.9564120150366814	81.0	106.0	2.1382079977968025	0.010343416985690596	Simulations
1.2266713516323384	0.5855738445994587	1.8005135386012867	2.32979018628365	1.1031188346513114	76.0	110.0	2.112002907665049	0.009805562008220492	Simulations
1.1721910366643562	0.5824744886439934	1.820877858360556	2.4434049367138893	1.271213900049533	45.0	82.0	1.9221036968040404	0.01149617281817707	Simulations
1.029276628256381	0.5828243787962977	1.6763173890818575	2.1404192680711316	1.1111426398147506	48.0	77.0	1.9263226802528086	0.012283758321095016	Simulations
1.1883044102272067	0.6226613658861091	1.8638698526321518	2.394831800336493	1.2065273901092863	55.0	84.0	1.9848963396674906	0.011774567443164595	Simulations
0.5552891742712773	0.606350969094237	1.5121176404833936	1.5575938337618982	1.0023046594906209	45.0	41.0	1.5540123644177009	0.01551214591508671	Simulations
1.0343431678269719	0.7385642746568255	1.605251469415789	1.939242348251286	0.904899180424314	85.0	111.0	2.1430479662297413	0.009906884154352652	Simulations
1.1950704430922376	0.7015227636273949	2.058658888196567	2.57694738592491	1.3818769428326723	45.0	68.0	1.8648168342996554	0.013221087254544753	Simulations
1.245673179494555	0.7780546424119479	2.1793019427025344	2.6087780405923597	1.3631048610978047	54.0	76.0	1.9138498548756744	0.012322074370016558	Simulations
1.0833616091818528	1.2611667295875935	2.419706940963838	2.3329009155929636	1.2495393064111109	77.0	68.0	1.8670088276722172	0.013246011014611555	Simulations
1.2321813778923032	0.5477741292913971	1.7477885820068029	2.4206305098156453	1.1884491319233421	43.0	77.0	2.0367977432052027	0.013328606828967143	Simulations
1.2790036779645286	0.6801938655103306	1.8524414417015833	2.4825865936012215	1.2035829156366928	54.0	93.0	2.062663536801649	0.011231274268133652	Simulations
1.1644596567249186	0.5769589923155505	1.7465875573887766	2.295723242831743	1.1312635861068243	54.0	90.0	2.029344240392583	0.011344595690594267	Simulations
1.0508621353716148	0.8721879974349953	2.1049794725693136	2.2884134704845502	1.2375513351129355	62.0	71.0	1.8491462984650378	0.012490977050926546	Simulations
1.2990965866689141	0.6647951380051396	1.9583888047904896	2.5585193551233067	1.2594227684543926	54.0	87.0	2.0315015888296277	0.011753407964318613	Simulations
1.227346614462284	0.6460390648152363	1.8497149045986867	2.4592218207182923	1.2318752062560083	47.0	84.0	1.9963238225992972	0.011873163790876079	Simulations
1.5018429522047785	0.6343241863815141	1.9114224636343122	2.701938074373292	1.2000951221685137	68.0	111.0	2.2514365940351637	0.010548160796653553	Simulations
1.0153285667217737	0.7511098233045062	2.286485391298349	2.4048638006524845	1.3895352339307108	65.0	71.0	1.7306965249449753	0.011145813696578473	Simulations
0.9628467238493381	0.6513893969843643	1.7180239608946144	2.016580584988863	1.0537338611395248	51.0	68.0	1.91374754039706	0.013770595934315098	Simulations
0.9726948135940952	0.557896393697064	1.6519503221884992	2.0779676426006235	1.1052728290065283	38.0	64.0	1.8800495118190859	0.014230791505092703	Simulations
0.9373148327295002	0.5303020294302329	1.5363538796296428	1.9447407665882923	1.007425933858792	43.0	68.0	1.9304057015281095	0.013954471790122828	Simulations
1.2574541894624884	0.62589928183607	1.521451505984239	2.1837891500639453	0.9263349606014569	69.0	120.0	2.3574508605893922	0.010310230827058241	Simulations
0.9863022484023996	0.7563159203727607	1.9682104049669586	2.271352029824318	1.2850497814219184	53.0	71.0	1.7675206537999235	0.011573620750518307	Simulations
0.6850018887893139	0.6372097972153303	1.597592317407884	1.6591056518469836	0.9741037630576697	76.0	81.0	1.703212444882794	0.00948467155924087	Simulations
1.120270412494425	0.7242353599789513	1.8488509721116517	2.2489988104870364	1.1287283979926115	77.0	105.0	1.9925066246997696	0.00947223353243947	Simulations
1.5933952896542765	0.7316438980781534	1.7669433212671253	2.5399701109757626	0.9465748213214862	73.0	111.0	2.683327354334	0.012829036647671875	Simulations
1.2093716808217219	0.7396220890626126	2.0647102722222597	2.4346836748913097	1.2253119940695878	80.0	102.0	1.9869908126868783	0.009711619627134242	Simulations
0.7021117952439742	0.794456803410857	2.1135202509802795	1.7358127272747057	1.0337009320307315	78.0	70.0	1.6792214009758681	0.010682749405800036	Simulations
1.4760914525878273	0.7196775394238317	1.6693813989975566	2.460211507473221	0.9841200548853937	57.0	99.0	2.499909940113685	0.013352284064350314	Simulations
1.2577115439357773	0.7559330745747601	2.009088608828822	2.520715154908509	1.2630036109727318	49.0	72.0	1.9958099351490541	0.013846865785693522	Simulations
1.2619638328910219	0.6265860823758735	1.8226460548035397	2.5012015566921293	1.2392377238011074	40.0	73.0	2.0183387808920203	0.013879018535372085	Simulations
0.910170255874778	0.7774987645727902	1.6457408006610907	1.8598184440150443	0.9496481881402663	68.0	83.0	1.958428886867252	0.011683093290148485	Simulations
1.0930022375432022	0.6446532251228121	1.7934658845400155	2.2591003304866653	1.166098092943463	47.0	71.0	1.937315860610189	0.01343745338857087	Simulations
0.9348222523337673	0.8057304989063943	1.8271469526738782	2.010693649224876	1.0758713968911087	67.0	79.0	1.8688977651372423	0.011420096849006307	Simulations
0.7094879336859223	0.5919552287926166	1.5423911070721938	1.7341555218527656	1.0246675881668432	47.0	60.0	1.6924079007468311	0.01265128876372081	Simulations
1.1810903755623934	0.740069675487868	1.8851633552090072	2.4368915181983692	1.2558011426359759	57.0	95.0	1.9405074859887754	0.010067726301978237	Simulations
1.2917382084326836	0.9297836960247053	1.9214049981268564	2.2854057685318305	0.9936675600991469	74.0	95.0	2.2999701915435335	0.012648580667730891	Simulations
0.858813060705838	0.6406871926939058	1.3990963228360827	1.6668642069452753	0.8080511462394373	63.0	82.0	2.0628201750627295	0.012739244643327294	Simulations
1.181872423459397	0.6059748035432968	1.871597925536376	2.338573637812758	1.156701214353361	63.0	89.0	2.021761202282568	0.011411377586956012	Simulations
1.490870660905224	0.7938861250826792	1.8125010692607066	2.5160038705246754	1.0251332096194514	68.0	107.0	2.454318957688107	0.012105820098488873	Simulations
1.202192139282641	0.5564532223607574	2.22976929588029	2.7876740584022897	1.5854819191196488	52.0	82.0	1.758250299032213	0.009928542227687681	Simulations
0.6717074118366672	0.7887542875131487	1.8048518916602025	1.6258738470548084	0.9541664352181413	79.0	69.0	1.7039730041259538	0.011143514192339487	Simulations
1.555183688618994	0.8045244347711238	2.1756690435779746	2.918649112394803	1.363465423775809	59.0	97.0	2.14061102063906	0.01131982125158225	Simulations
1.0682257111011966	0.5842217455822287	1.6059241563735458	2.123143163402156	1.0549174523009595	57.0	92.0	2.0126154504043985	0.010968168950545176	Simulations
1.4738817735424197	0.5755745630054809	1.5685799517405385	2.478227614147815	1.0043458406053951	59.0	121.0	2.467504234053481	0.010769029423479607	Simulations
0.9399814920835496	0.4504652697788246	1.5670910808987906	2.039726997589591	1.0997455055060412	38.0	68.0	1.8547263774913296	0.0131059759683377	Simulations
1.0006705596787095	0.7014257671665791	1.4856812422556713	1.9121765558799466	0.9115059962012371	52.0	82.0	2.097821148570686	0.01303526445160919	Simulations
1.1097774385557568	0.9688484481688904	2.28299009049698	2.3498505278860873	1.2400730893303304	61.0	63.0	1.894929055476128	0.014637203748229664	Simulations
1.4070103687990534	0.5537857533929933	1.7243911069933795	2.61562649224491	1.2086161234458566	38.0	84.0	2.16414992445042	0.013259529134546652	Simulations
1.218458018773852	0.7156559656230608	1.6743098055359396	2.2200583539130294	1.0016003351391773	72.0	111.0	2.2165111931642287	0.010344960792703552	Simulations
1.0645903892531035	0.5946965385879929	1.6571400230894093	2.0577848677390644	0.993194478485961	68.0	97.0	2.071885126542366	0.010834474397488521	Simulations
1.1695760813004727	0.693805700599663	1.7235630654040492	2.253109537388626	1.083533456088153	50.0	80.0	2.079409292559324	0.013202171918704948	Simulations
1.6396136545006663	1.0461800538612434	2.130661524163217	2.6943930649287986	1.0547794104281323	75.0	99.0	2.554461187135945	0.013666858741218552	Simulations
1.3873826907139903	0.8229921318294782	2.405182901414492	2.9133263127801	1.5259436220661098	69.0	97.0	1.9091965591988846	0.009618202489118776	Simulations
1.3535189519001745	0.5524977839940661	1.3329427532859264	2.109288616829441	0.7557696649292667	80.0	134.0	2.7909146327364858	0.011050283556421323	Simulations
1.4232251948137016	0.8727112821908478	2.273563569738462	2.6742483054671466	1.251023110653445	90.0	113.0	2.137649003198918	0.009699336154554985	Simulations
1.478091252889623	0.6280774822199517	1.786085514906426	2.619939631365663	1.1418483784760398	53.0	92.0	2.294472436754123	0.01302350517300973	Simulations
0.685649889701671	0.629193015278904	1.665191145436971	1.7745574712071104	1.0889075815054394	51.0	58.0	1.6296676608254894	0.01214789284006251	Simulations
1.3217910347187096	0.6511582555064477	1.7532609607312963	2.4089156867827466	1.087124652064037	68.0	106.0	2.21585968288837	0.010828929500474082	Simulations
1.057737820696968	0.6922896151363966	1.8403678019007228	2.197251582468209	1.1395137617712408	59.0	81.0	1.9282361092794864	0.01169483602436877	Simulations
1.5085514039802712	0.7417752779186642	1.6862649060491952	2.496119199384854	0.9875677954045828	66.0	109.0	2.527542120146044	0.012272799395180532	Simulations
0.818568527902001	0.5590121656630762	1.6454761859887046	1.9550547973168988	1.1364862694148978	49.0	72.0	1.7202625759160541	0.01086984431310396	Simulations
0.9640456923786742	0.7247402187218985	1.9008155707528556	2.1085864467190745	1.1445407543404003	59.0	71.0	1.8422991393908508	0.012415596267293017	Simulations
0.6991352587726829	0.5223332539495047	1.952070559960352	2.1141191985092043	1.4149839397365214	52.0	64.0	1.4940941300739188	0.009051110044499718	Simulations
0.7573978597032803	0.4621529179450895	1.2450515763770265	1.5356429241074696	0.7782450644041893	65.0	91.0	1.973212544923919	0.010775234775522516	Simulations
1.0268421582895455	0.9289117307814996	2.0394686742045476	2.1523186615394705	1.125476503249925	74.0	80.0	1.912362146454801	0.011691946927343516	Simulations
0.616093066156647	0.6794355096538844	1.5872116642629266	1.5689886388101673	0.9528955726535202	69.0	63.0	1.6465483562286032	0.011419760031282256	Simulations
0.7540363175137696	0.5274866819080928	1.7799034307092567	1.997225006553622	1.2431886890398522	67.0	87.0	1.6065340878351555	0.007861512558529618	Simulations
0.8773653096523735	0.913433641851203	2.3240724698955937	2.154062214456175	1.2766969048038017	66.0	63.0	1.6872150362009406	0.011978473926632977	Simulations
1.2105608097049116	0.5834970388465359	1.879755764242335	2.5431797194917554	1.3326189097868437	41.0	79.0	1.9084073479780834	0.011802141092182805	Simulations
1.123470617343732	0.7711458505517654	2.5286349756953728	2.733978946814222	1.61050832947049	58.0	67.0	1.6975875857240128	0.011395313598951545	Simulations
1.3679776439977227	0.7391652249650411	2.441623644119127	3.0082732841278075	1.6402956401300848	54.0	83.0	1.8339823691107502	0.010541924936502684	Simulations
0.7234731362902209	0.7234731362902207	1.8959435461929608	1.8980441693333039	1.174571033043083	73.0	72.0	1.6159466868647732	0.009616383356095267	Simulations
1.0167877177253	0.6050907238722933	1.6623017284811987	2.056812260920211	1.040024543194911	58.0	83.0	1.9776574258543662	0.01185292218009879	Simulations
1.345714235668806	0.6150258319923116	1.8723736340874808	2.573257980237173	1.227543744568367	43.0	75.0	2.096265808549243	0.014237622181505665	Simulations
1.0983377605916487	0.6413528540577095	1.5261180105264445	2.029830210329481	0.9314924497378322	58.0	91.0	2.1791161172597535	0.012348824994852388	Simulations
1.1861936736442478	0.8729571673230236	1.846164662508204	2.1303188183761392	0.9441251447318914	71.0	86.0	2.2563945365326523	0.013651387777026198	Simulations
1.0526109638310002	0.6469932535326175	1.7355752450463289	2.131666073414958	1.079055109583958	61.0	88.0	1.9754932389290536	0.011161510326592912	Simulations
1.065175338094785	0.6207681391163082	1.5148352824771065	1.9908995851340028	0.9257242470392177	46.0	72.0	2.1506399897178663	0.015343972811372461	Simulations
0.9449041524747723	0.5877361633654752	1.9757321597065451	2.2479703920717875	1.3030662395970152	45.0	59.0	1.725139001964315	0.013334112047427437	Simulations
1.3180578504841303	0.6587031631723372	1.9186638999551708	2.5174313072015475	1.1993734567174172	74.0	112.0	2.0989553279689397	0.009550638054486044	Simulations
0.8812989021466557	0.8976263447643502	2.145010927628446	2.1236736398942813	1.2423747377476255	72.0	70.0	1.7093664056180138	0.011049452490233487	Simulations
1.2217739648841057	0.8044278794207655	2.3373413752582217	2.723084615354137	1.5013106504700313	60.0	81.0	1.813804900738959	0.010605176331332337	Simulations
0.9983173504691659	0.9396458978781799	1.846688548153428	1.9235444821248375	0.9252271316556716	81.0	85.0	2.0789970552232955	0.012422208408297625	Simulations
0.6191814205292809	0.5592740758692232	1.7979117806555482	1.943576146499256	1.324394725969975	41.0	51.0	1.4675203006987194	0.010850597269724928	Simulations
1.231108104421886	0.4490652332761016	1.699925217996943	2.5000514833345995	1.2689433789127136	36.0	83.0	1.9701836385140787	0.011787109733343137	Simulations
1.269597025029854	0.42675828088762113	1.5742611275337985	2.393989503210104	1.1243924781802501	50.0	111.0	2.1291404466566757	0.009822262332336497	Simulations
1.106303619768337	0.6958003262905073	1.6882803170394338	2.123971456294671	1.017667836526334	55.0	81.0	2.087096968245109	0.013104909022906406	Simulations
1.2446007597794528	0.7467212307811755	1.9461809239822694	2.446536674150693	1.2019359143712403	57.0	80.0	2.035496772247239	0.01281726167189707	Simulations
1.1196046783637839	0.5566061276319616	1.796744393992889	2.412368250216059	1.292763571852275	38.0	74.0	1.8660552499631555	0.012162050026779093	Simulations
0.9596178542766212	0.800643939771083	1.8811309325860872	2.0624261858185706	1.1028083315419495	58.0	67.0	1.870158328360542	0.013480006185508923	Simulations
1.2055043416371565	0.4219256941931464	1.9332759671660233	2.70033557624083	1.4948312346036736	36.0	82.0	1.8064484563414767	0.010404342569861075	Simulations
1.134003374002628	0.6552731303454611	2.1613119650814268	2.5827006768356013	1.4486973028329733	50.0	69.0	1.7827745463355587	0.01208875750797371	Simulations
1.310597255114265	0.5699305269066313	1.7300131731264243	2.3998148672725965	1.0892176121583315	58.0	94.0	2.2032464775493854	0.012123732963839687	Simulations
0.9839922293522068	0.6586798022790374	1.673904428519434	1.9867417527644844	1.0027495234122776	59.0	78.0	1.9812941381450462	0.01264670609167219	Simulations
0.8827462575184841	0.6836812003206214	2.2373303741442925	2.3846290816859605	1.5018828241674764	60.0	69.0	1.5877597395175007	0.00966655970675703	Simulations
1.576075572806648	0.772750317387342	2.236660119215273	2.882944266384212	1.3068686935775642	65.0	93.0	2.205993823673385	0.012273427437495849	Simulations
1.0003329358415511	0.6967038470309392	1.8223128628024046	2.0749936731393235	1.0746607372977723	75.0	92.0	1.93083603143154	0.010317670156016288	Simulations
1.3161752787612415	0.767512796112801	1.9568722411274182	2.508813813740242	1.1926385349790003	58.0	87.0	2.1035827202953965	0.012331592541172097	Simulations
1.0412502780359154	0.6508057952353967	1.6763234766695014	2.1090921676311907	1.0678418895952753	47.0	73.0	1.97509780069647	0.013451014970235068	Simulations
1.2451563818728677	0.5961428599688645	1.8090388314527537	2.530023826367497	1.2848674444946293	48.0	96.0	1.9690932611049377	0.010182619192154511	Simulations
0.8447654449723646	0.7528817828176061	1.5936168934521244	1.7359526592293621	0.8911872142569975	85.0	97.0	1.947910193793191	0.009916774898171115	Simulations
1.245140424784108	0.7380212970974791	2.237333622593157	2.729225202413457	1.484084777629349	54.0	78.0	1.8389954829757593	0.011268178668475761	Simulations
0.9703783152314638	0.5246918920789128	1.7402201542119267	2.209435514253376	1.2390571990219121	43.0	71.0	1.7831586112388207	0.011752606138200181	Simulations
0.9123790953102809	0.6697436648130854	1.5249832914169026	1.7903205521352197	0.8779414568249387	67.0	86.0	2.039225438345155	0.011953735761670862	Simulations
1.201835477868312	1.001741735790367	2.109561420782468	2.3557914291946718	1.1539559513263598	78.0	91.0	2.041491641415705	0.011314545721698908	Simulations
1.0821679571852199	0.5998029791568513	1.7786644178109579	2.263225000745681	1.1810570435604613	58.0	87.0	1.9162706941934604	0.010785073240490895	Simulations
1.2028486293222804	0.5746497480782753	1.8776646364887803	2.5061470719000987	1.3032984425778182	54.0	95.0	1.9229264687396876	0.00992951153853125	Simulations
0.7458104766944198	0.5926460899522283	1.907686668381088	2.042159028083606	1.2963485513891861	59.0	69.0	1.575316318975478	0.009502051401535793	Simulations
1.5176048471766166	0.5576424034292498	1.8353694055689176	2.767565745376628	1.2499608982000112	46.0	95.0	2.2141218572213117	0.012070890789442859	Simulations
1.6998904196938511	0.7474499725411148	1.6106403472018456	2.591090968543912	0.8912005488500608	74.0	135.0	2.9074162621278274	0.011405464004103671	Simulations
0.8496514391880261	0.7231245717084469	2.004061994263535	2.17103296302047	1.3213815238324438	38.0	45.0	1.6430023606836546	0.015918545625986585	Simulations
1.0083220405846678	0.7262844836055014	1.695002236638703	2.027156594864396	1.0188345542797284	68.0	93.0	1.9896818245406955	0.010672448859201709	Simulations
0.8862339234832135	0.7627678066371524	1.9377059938945358	2.1403387658652333	1.2541048423820198	58.0	71.0	1.7066665349923376	0.010861707016844638	Simulations
0.9824305482518145	0.5949287655252371	1.8269300318253274	2.2869075795146956	1.304477031262881	41.0	69.0	1.753122151411674	0.011738065529527855	Simulations
1.0218330342202187	0.7422006366982146	2.01272175682362	2.2881943139162964	1.2663612796960777	63.0	80.0	1.806904830875321	0.010669006523713394	Simulations
0.8497872207552588	0.5297757061177768	1.7606527402648584	2.0655411272387845	1.2157539064835257	53.0	76.0	1.698979634137638	0.010061428406263525	Simulations
1.3574810646787594	0.6442270282315945	1.709107238420256	2.419891497635233	1.0624104329564734	67.0	114.0	2.277736948517311	0.0104175538822454	Simulations
1.2137644039286364	0.5792123020304405	1.7480757104195406	2.3997024942657954	1.185938090337159	48.0	90.0	2.023463546552895	0.01129807620616238	Simulations
0.9531935353966365	0.6059740120916017	2.2775725605415063	2.5651052796507625	1.611911744254126	45.0	59.0	1.591343501773234	0.011360089564866348	Simulations
1.1298013234572792	0.5348854230257036	1.4544895842333507	2.054474072080795	0.9246727486235158	62.0	106.0	2.2218391048499284	0.01086560705011583	Simulations
1.3114366988877204	0.5829902876208168	1.377812182715012	2.1574029237336156	0.8459662248458952	49.0	97.0	2.550223472723887	0.013923955402986774	Simulations
1.2689402378890553	0.46570752067021903	1.666579261467379	2.4708721875746384	1.2019319496855831	43.0	93.0	2.0557504842274983	0.01117919536245724	Simulations
1.1893819551161362	0.7052626475131616	1.9747030965350656	2.486325248776191	1.296943293660055	53.0	85.0	1.9170655038892457	0.011045878035915589	Simulations
1.399811092110377	0.5406654507364221	1.6315171690939096	2.5051902370815897	1.1053791449712127	40.0	82.0	2.26636285701485	0.014394864182569906	Simulations
1.2116818015746689	0.5866170274772283	1.5661039144234816	2.1668245297233066	0.9551427281486378	70.0	111.0	2.268587160709775	0.010646793604583774	Simulations
0.8543688199548669	0.4956082591712372	1.3935080343662727	1.792199080564101	0.9378302606092341	46.0	76.0	1.9110058139943693	0.012293844309735574	Simulations
1.2472663524752525	0.6486196788897189	1.6833655756454569	2.3170837390261134	1.069817386550861	66.0	111.0	2.1658684633052143	0.010044555210842304	Simulations
1.1780374684937935	0.674683432403185	1.7978821945592194	2.3068076606788543	1.1287701921850608	63.0	96.0	2.043646861557676	0.010741103361935359	Simulations
0.662984929448871	0.7758131740318404	1.8811683541481476	1.7472859343107094	1.0843010048618384	70.0	61.0	1.6114399290198467	0.011284432932173266	Simulations
1.3582420498603813	0.5616638742485813	1.7198725174831866	2.5015138838180935	1.1432718339577121	58.0	110.0	2.18803071108513	0.010269390798773224	Simulations
0.7982910409945911	0.47359695262075463	1.9022803938691981	2.2374929825548784	1.4392019415602872	38.0	58.0	1.5546761840309478	0.010976105511830665	Simulations
1.438666240754087	0.614482847233293	2.242959127324873	2.9294242997803757	1.4907580590262888	50.0	77.0	1.9650568259840726	0.012656766666077365	Simulations
1.0357300312866065	0.5447233378937679	1.298241607352965	1.8309098844735479	0.7951798531869414	51.0	88.0	2.3025104033201824	0.013672814486247782	Simulations
1.2071331043235076	0.7056023069819986	1.8966460323948455	2.324984876705523	1.1178517723820154	71.0	97.0	2.079868667874672	0.010891674567873676	Simulations
1.0153861787593206	0.7478954005961942	2.6930353834626235	2.8576422652049374	1.8422560864456168	57.0	65.0	1.5511645130283545	0.009743872361353139	Simulations
1.3653021077440874	0.6107891089948595	1.6728581539995797	2.3088927141477846	0.9435906064036972	67.0	107.0	2.44692210634404	0.012065123143686626	Simulations
1.0703412877727383	0.507931165163656	1.853154056097113	2.3698213295431074	1.2994800417703691	41.0	69.0	1.8236688932248166	0.01256295386114583	Simulations
1.2184911315024678	0.5517375993704692	1.6719488330510184	2.3638042213421246	1.1453130898396569	53.0	103.0	2.0638934823254798	0.01014920888445847	Simulations
0.9268703311310116	0.45379456675392127	1.4598914366598819	1.9049022279105885	0.9780318967795769	54.0	87.0	1.947689266764174	0.011054753207285778	Simulations
0.9614303041837022	0.7081445555164438	2.3280024752295314	2.4724888388399013	1.511058534656199	61.0	69.0	1.6362627801195337	0.010295716818299844	Simulations
0.8402693710439952	0.5055195113064384	1.6813890415145465	2.0637974794547223	1.223528108410727	45.0	69.0	1.6867593521291826	0.010931219721584106	Simulations
0.9856607090752825	0.5627697852748721	1.5099854248696887	2.0101876106666126	1.02452690159133	46.0	85.0	1.9620642537978463	0.011439673974052742	Simulations
0.9874991950093865	0.8368073376493104	2.061066737301252	2.258394139871079	1.2708949448616926	54.0	64.0	1.7770108764708736	0.012960195494258258	Simulations
1.1967494341428961	0.6231126462423675	1.9658365305452623	2.455768038290534	1.2590186041476377	53.0	80.0	1.9505415012934633	0.012048433682897413	Simulations
0.720606252738185	0.5464708677470667	1.4048508457204858	1.5916560868578244	0.8710498341196394	48.0	60.0	1.8272847597365012	0.014495024627824288	Simulations
1.1777260793372415	0.6549707640262161	1.838951190589856	2.361839126472194	1.1841130471349524	70.0	107.0	1.9946061165247992	0.009309382050090546	Simulations
1.1714162065600067	0.7307863184696957	1.8234223216985304	2.229762631828779	1.0583464252687724	71.0	95.0	2.1068362670214715	0.011316612624536395	Simulations
1.3531281281584073	0.5861805600433825	1.7900525634803708	2.5799469547370357	1.2268188265786284	45.0	85.0	2.10295676822309	0.012616696376522718	Simulations
1.109423402929934	0.6733000467055315	1.7466288492472828	2.235072943179565	1.125649540249631	61.0	96.0	1.985585089550964	0.01030796028044525	Simulations
1.077835928379608	0.7243106256009186	2.142835760331525	2.440026429832647	1.3621905014530389	59.0	75.0	1.7912519777739517	0.011212910632137257	Simulations
0.9384989513019601	0.790519853926271	1.9584470531145568	2.1739552993757227	1.2354563480737626	49.0	60.0	1.7596374835624118	0.013587970646414628	Simulations
0.704835434298256	0.6903963702483191	1.5662156642757	1.6044651846173066	0.8996297503190506	64.0	64.0	1.783472794278189	0.013042018884290234	Simulations
0.9053336579587581	0.5829835965837717	1.6699581978814542	1.9830027827474028	1.0776691247886447	57.0	78.0	1.8400849918905438	0.01127913339260435	Simulations
1.2269404603924332	0.7424978843381318	2.010605701876697	2.4677734541700755	1.2408329937776423	44.0	64.0	1.9888038652623878	0.015498453209368534	Simulations
1.177127660173925	0.8022010211783277	1.7359823188707064	2.1158013177433848	0.9386736575694599	94.0	122.0	2.2540329119514255	0.009610726073582473	Simulations
1.0717693450412313	0.6168062519399937	1.751550163176613	2.2234168481404932	1.151647503099262	73.0	114.0	1.9306400979092422	0.008325256561396252	Simulations
1.0184578897273024	0.6315131987667014	1.7275696653021684	2.0674976298100423	1.0490397400827398	72.0	95.0	1.9708477675468945	0.010303329935435644	Simulations
1.254280479040964	0.6286193803863926	1.6051568984711564	2.2737539481902242	1.0194734691492602	52.0	93.0	2.230321844557316	0.012443568945792547	Simulations
0.9098459899465228	0.7550171249083442	1.9307918501778545	2.068629405572399	1.158783415625876	55.0	62.0	1.7851734652718527	0.013484907543800275	Simulations
0.9664320358381497	0.49345548467308276	1.694913311288005	2.1548818734181543	1.1884498375800046	45.0	74.0	1.813187065434801	0.011601726685848667	Simulations
0.9530861686635677	0.797669311433078	1.86466134954924	2.028590856998938	1.0755046883353703	74.0	84.0	1.8861757452110433	0.010898382214136996	Simulations
0.723436081739306	0.7234360817393057	1.937593251237599	1.7983194365550195	1.0748833548157135	67.0	66.0	1.673036826273431	0.011249533360609795	Simulations
1.2644717343246392	0.7678450741118403	1.804087504132764	2.3976124883105765	1.1331407539859373	58.0	93.0	2.1158999708348074	0.011626574469462686	Simulations
1.137523978312656	0.460189111682775	1.4857437715496125	2.244606677838706	1.10708269952605	36.0	89.0	2.0274968426474715	0.0114572996380215	Simulations
1.076700797071857	0.5745891912088892	1.608256171622985	2.117050946043869	1.040350148972012	54.0	91.0	2.034940782327723	0.011263591341118682	Simulations
1.087509471607526	0.5667622137555077	1.8325471095537036	2.3538106489907165	1.2663011773831905	49.0	82.0	1.8588079131813355	0.010907045020857861	Simulations
1.5417972130478201	0.6898264712143926	1.873186913004732	2.652660803850055	1.1108635908022348	54.0	89.0	2.3879266777790216	0.014109646503014519	Simulations
0.9618387878420116	0.5267681829249669	1.6440644787542393	2.1086569909506108	1.1468182031085992	46.0	80.0	1.838702058647851	0.01098359657371768	Simulations
1.199834601632489	0.6177634576716651	1.6275303475242822	2.171106346133505	0.9712717445010159	67.0	104.0	2.2353232845756215	0.011158495162295215	Simulations
1.248497654459775	0.6047170818131027	1.7842782213974773	2.3951059284567293	1.1466082739969543	56.0	91.0	2.08886154301647	0.011678207348858327	Simulations
1.033434886747991	0.4620145703425731	1.701287296941934	2.2544911387588313	1.2210562520108403	48.0	89.0	1.8463450271403354	0.00994013679891046	Simulations
1.2186417244051913	0.8144481601363076	1.8746744424786894	2.291618904696465	1.0729771802912738	79.0	107.0	2.1357573551325433	0.0102312873902427	Simulations
0.8830796767223758	0.7543534719954255	1.6815349391015886	1.8511264572434454	0.9680467805210696	68.0	79.0	1.9122283080648657	0.011838668130889431	Simulations
1.8035191537340414	0.6590706838816196	1.898200638770482	3.079728684948228	1.2762095312141868	55.0	130.0	2.413184206529293	0.009776446504300738	Simulations
1.5280391702972747	0.5892123657683999	2.0270535060462556	3.0116066722027632	1.4835675019054886	35.0	87.0	2.029976167808116	0.011740951610080656	Simulations
1.517601675791521	0.710030083221372	1.8124465407442063	2.564872419176819	1.047270743385298	73.0	113.0	2.449101567457027	0.011435863766369672	Simulations
1.683964009037969	0.47789602953465526	1.4303116079361085	2.661315733742844	0.977351724704875	50.0	129.0	2.7229866858284466	0.01120302269979577	Simulations
1.1308622581563097	0.6273712407729398	1.575537319492289	2.089345287163968	0.9584830290076582	63.0	96.0	2.179845885562648	0.011710688963641046	Simulations
0.8541600916028342	0.4756345346120441	1.3428930722589854	1.7724874499622483	0.918327358359414	44.0	74.0	1.930125933663553	0.012820202447884274	Simulations
0.7762329621034294	0.6393347597277894	1.9586391600781299	2.070287533267992	1.2940545711645626	43.0	48.0	1.5998456165607233	0.014123597776195379	Simulations
1.157910514984904	0.6309244705104404	1.5803220743468955	2.08961137276428	0.931700857779376	78.0	111.0	2.2427921529928376	0.010498161506954068	Simulations
0.9232284368543753	0.8085352410673707	1.961413959127799	2.046178815964853	1.1229503791104776	63.0	67.0	1.822145353907527	0.012919970874636175	Simulations
1.7142496674608507	0.7995692416522056	2.1649875262912515	3.0045182163893958	1.290268548928545	61.0	103.0	2.3285991268130846	0.011839439786116589	Simulations
1.0717046966503547	0.7926226109985772	1.8578021654846126	2.1825421706504233	1.1108374740000686	56.0	74.0	1.9647718246227337	0.013167051044849207	Simulations
0.74604611631366	0.5618747530474564	1.5709072769089716	1.6960877914954224	0.9500416751817624	63.0	72.0	1.7852772523594043	0.01161316862813027	Simulations
1.0499368867872048	0.7492058059659894	1.7773839910044593	2.106970771159978	1.0570338843727733	84.0	109.0	1.993285931803615	0.009129804366610974	Simulations
1.0462512081039035	0.9204001364391596	2.0511716299304537	2.1638428872418256	1.1175916791379221	79.0	85.0	1.9361658892368914	0.01121414784628232	Simulations
1.1461352437339258	0.965992764703302	1.9939510391638384	2.2318824869849134	1.0857472432509876	64.0	76.0	2.0556188384159486	0.013678589193189596	Simulations
1.1389642039044579	0.9005649375248257	2.2146245905501227	2.3348247349537625	1.1958605310493047	79.0	85.0	1.952422271939251	0.011356060167611043	Simulations
0.9618537117982298	0.7250694236816542	1.7982017636037917	2.0880556019955465	1.1262018901973168	57.0	76.0	1.8540686356242109	0.011719666473273063	Simulations
1.2727154239031722	0.5434374689445607	1.88416096462451	2.5841418232144195	1.3114263993112474	50.0	93.0	1.9704817781398896	0.010522025896124783	Simulations
1.2587944946919665	0.7628120148399165	2.1338251080513304	2.610712519542329	1.3519180248503626	53.0	79.0	1.9311174727708038	0.012018176307089578	Simulations
1.4275333760525233	0.48614540641077486	1.6708227943525427	2.6412721453649475	1.2137387693124242	41.0	100.0	2.176145487106103	0.011217750117858959	Simulations
0.9362411919091387	0.5404458880762972	1.6393397977067297	2.0239700434657126	1.087728851556574	56.0	82.0	1.860730310287668	0.010925231339619305	Simulations
1.1558506158832194	0.7920035453838346	2.0738122570227575	2.3731421278960867	1.2172915120128673	60.0	74.0	1.9495265550418144	0.013015186570521661	Simulations
0.6458473265203584	0.7249525578384997	1.850992436388086	1.8301601822174185	1.1843128556970601	80.0	72.0	1.5453350636308234	0.00872110668050738	Simulations
1.0919018401827065	0.5073063796607393	1.7373703423827522	2.275435910027963	1.1835340698452566	47.0	79.0	1.9225774466513408	0.011937236899238292	Simulations
1.1437224647130202	0.5412513794261669	1.3793706174602136	2.027010485849779	0.8832880211367586	66.0	122.0	2.2948465702513343	0.009822931972087237	Simulations
1.237631326415576	0.5871590733413068	1.6517373304059708	2.291726970510624	1.054095644095048	65.0	111.0	2.174116725886004	0.010093958550644364	Simulations
1.1951162070925787	0.6708660774610524	1.7400188450536138	2.29878729218599	1.1036710850934113	54.0	86.0	2.0828554115752955	0.012308868526957902	Simulations
1.1469108003665498	0.6080875240955033	1.8880360635299938	2.382493586615591	1.2355827862490412	52.0	78.0	1.9282346866034934	0.012144623763276602	Simulations
1.0844778791806593	0.6336102044980827	1.924451379033619	2.3253233478180118	1.2408454686373525	64.0	89.0	1.8739830273721272	0.010180987489834975	Simulations
1.4731331521543103	0.6891139625290043	1.828274790149459	2.510483466221794	1.0373503140674836	82.0	125.0	2.42009226022992	0.01020049638277258	Simulations
1.5926277693594193	0.7618366764201028	1.9229347445344283	2.7188765357178566	1.1262487663584373	64.0	106.0	2.4140994573596304	0.01199514258715708	Simulations
0.6518865887867634	0.6211367273221069	1.5971969532753427	1.6484685623813504	0.996581973594587	58.0	61.0	1.654122396410065	0.011902721153278041	Simulations
0.9535730541173509	0.630033418741631	1.56422237366795	1.9488729339361384	0.9952998798187874	59.0	87.0	1.9580761270572709	0.011142952366058884	Simulations
1.0980668658354644	0.5086589329271433	1.4130020911974666	1.9809461193086721	0.8828792534732076	59.0	101.0	2.243733909836162	0.011543580130523815	Simulations
1.482799548012474	0.9744233510740021	2.2030195932548122	2.647947827475729	1.165148279463255	65.0	87.0	2.272627333488876	0.013613346318751255	Simulations
1.1676069107622564	0.9086746023025674	2.2036605197432797	2.459525532576514	1.2919186218142578	52.0	63.0	1.9037774446834517	0.01474388626386826	Simulations
0.5715294217371245	0.9607038952161344	2.0104161590829435	1.4929066162669586	0.9213771945298341	75.0	50.0	1.620299075265009	0.013925202615017713	Simulations
0.6859879108492061	0.7224086587311249	1.3287941889093071	1.5778754985276136	0.8918875876784075	79.0	75.0	1.7691416724778508	0.010973994444766806	Simulations
1.2173142686901144	0.5672625949710193	1.905688619156207	2.533130171295113	1.3158159026049987	47.0	84.0	1.925140261855876	0.01124956620835893	Simulations
0.6928624077508847	0.81474854189722	2.0162414524256804	1.9674765108171173	1.2746141030662326	75.0	65.0	1.543586020336762	0.009635167432591097	Simulations
1.20004532903051	0.719786235260377	2.3016747820022694	2.816052033691182	1.6160067046606719	50.0	79.0	1.7425992265808667	0.01014228870830594	Simulations
1.0955205941977797	0.6258868192000542	1.9285721158376359	2.354562429425429	1.2590418352276493	50.0	71.0	1.8701224721414416	0.012720179628504287	Simulations
0.7193991514865719	0.6090187508153133	1.7123950521615532	1.818052145349306	1.098652993862734	48.0	54.0	1.6548010659464454	0.013456625777843024	Simulations
1.3224677696697869	0.7362048516078108	2.2066925701250493	2.7815843829945974	1.4591166133248106	44.0	69.0	1.9063482367295856	0.013490024398917654	Simulations
0.9365973193836834	0.6761398119130217	1.8685647747773841	2.1332973881484176	1.1967000687647342	57.0	73.0	1.7826500088284145	0.011424979227648544	Simulations
0.997112851027157	0.5386825226291241	1.6663517513998174	2.1084340670485524	1.1113212160213954	47.0	72.0	1.897231904378545	0.012831889367979112	Simulations
1.0893578646473374	0.6644312985700385	1.9129306303384843	2.346824466278802	1.2574666016314646	51.0	76.0	1.8663115690181995	0.011844603357764737	Simulations
1.4067058338817218	0.6722947127942172	1.9897502437497554	2.7766750688790247	1.369969234997303	42.0	82.0	2.0268156378595545	0.01242944957443465	Simulations
1.0298008621105386	0.5856227458036634	1.7748230012260384	2.1961522344766866	1.166351372366148	59.0	88.0	1.8829250657298984	0.010374722574342705	Simulations
1.027467466919515	0.7061448003040665	1.7487252963373296	2.0618712985591077	1.0344038316395927	78.0	101.0	1.993294335821356	0.009853017411730223	Simulations
0.8814314857057206	0.819234711896377	1.9058032173959079	2.03355355161309	1.1521220659073692	67.0	75.0	1.7650504332729167	0.010929458754783556	Simulations
1.2749452148893694	0.6790916123999327	1.9497974851972486	2.5400289667581446	1.2650837518687752	56.0	90.0	2.007795106850457	0.011173467238372635	Simulations
1.4208786260816921	0.8091826496392944	2.1483707613893266	2.7147668528291216	1.2938882267474294	51.0	72.0	2.0981463442584145	0.01484882372788015	Simulations
1.221667358671395	0.7903378947806023	1.6507219666902393	2.1290458388240387	0.9073784801526437	71.0	103.0	2.3463702141865657	0.011945928758681806	Simulations
1.6741363999417576	0.6414243896220468	1.8518966271427888	2.830121806934115	1.1559854069923576	54.0	100.0	2.4482331609163865	0.012917409616578019	Simulations
0.9127693034551296	0.8731942870667815	2.162098941288063	2.2235091255259714	1.3107398220708417	51.0	53.0	1.6963771818674453	0.01438598079901529	Simulations
0.9099589440057607	0.574572736444857	1.7170346500293527	2.0902092152913356	1.180250271285575	55.0	84.0	1.7709881252682091	0.009816125460037257	Simulations
1.3393237837719771	0.8182300313857602	2.074384759058468	2.6688399859785537	1.3295162022065765	68.0	103.0	2.0073768048476004	0.009760305344782724	Simulations
0.7528337246828294	0.5647454878281999	1.688834015305262	1.889128290233801	1.1362945655509715	73.0	92.0	1.6625339480681156	0.007971563043347259	Simulations
1.0902440332543661	0.44788645853281306	1.4615385598645023	2.2088844449780844	1.1186404117237183	37.0	104.0	1.9746152756759465	0.009438188394867132	Simulations
1.3690154195443685	0.5621578722360714	2.043359285217255	2.861315810397688	1.4923003908533194	40.0	85.0	1.9173859552241659	0.011048714938681082	Simulations
0.764289696850825	0.603724525500444	1.6973372878769795	1.832565738653897	1.068276041803072	63.0	73.0	1.7154421394313322	0.010665485831524857	Simulations
1.2749663637376134	0.6687942095044486	1.9145580333022945	2.455945384433086	1.1809790206954727	68.0	99.0	2.0795842613586752	0.010669647897130855	Simulations
1.4260460300788207	0.6518301314584203	1.7375762726858361	2.5277235903377018	1.101677560258881	68.0	125.0	2.2944314030901354	0.009585093399650494	Simulations
1.1344168988486298	0.8951255232563164	2.0124867599298235	2.2525176386789885	1.1181007398303586	80.0	94.0	2.0145927450336423	0.010749874721422444	Simulations
0.8798470901582992	0.7429357916691196	1.244620512646724	1.4836085034601905	0.6037614133018913	78.0	98.0	2.457276120622767	0.013235305922437159	Simulations
1.2168277050842393	0.6808745659678161	2.0376378475732593	2.586615586736729	1.3697878816524898	55.0	90.0	1.8883329465700034	0.010190146220396726	Simulations
0.9142837384546587	0.7240791509494371	2.1986075716537297	2.329302785087804	1.4150190466331451	49.0	55.0	1.64612822041518	0.013074122085637662	Simulations
1.0813017842626451	0.5942215604202428	1.7145931357300952	2.208201048141545	1.1268992638788997	48.0	74.0	1.9595372176752486	0.013115040195180621	Simulations
1.357863308574681	0.5771061542736575	1.7766225181915312	2.554433684870188	1.196570376295507	42.0	79.0	2.134796026606078	0.013849344699012212	Simulations
1.0215205066789546	0.5971993374484457	1.8942047303326466	2.2974822777156616	1.275961771036707	50.0	73.0	1.8005886460446057	0.011622857912461959	Simulations
1.5341481275556696	1.081157605863784	2.548460303261437	2.8768629409375412	1.3427148133818716	96.0	112.0	2.142571834514612	0.009815567631498401	Simulations
1.5743044749606536	0.6629688983611044	1.6655211266838186	2.5869700119902865	1.012665537029633	68.0	124.0	2.5546144481014226	0.010912141699188162	Simulations
1.1857114645070856	1.0087655407760328	2.465353564788599	2.582672479845756	1.3969610153386705	57.0	61.0	1.8487792082155057	0.014533982625217965	Simulations
1.150210744386041	0.4702581933591874	1.3610244053665337	2.0606651631331316	0.9104544187470907	55.0	110.0	2.263336989422148	0.010713194583753543	Simulations
0.7830890310837728	0.6028721928432865	1.7287444374269545	1.8604095850802795	1.0773205539965067	75.0	85.0	1.7268858170196129	0.00927261992878173	Simulations
1.3591736795293736	0.5360138623373545	1.999353984832943	2.785275546707135	1.4261018671777614	38.0	78.0	1.9530691395974134	0.012381320797882232	Simulations
1.0250951736802287	0.5500114349330487	1.3038618905109707	1.8361474256296824	0.8110522519494537	70.0	121.0	2.263907684389383	0.009742273805257298	Simulations
0.8928024933494272	0.764158191818874	1.63367587667538	1.8457648087442309	0.9529623153948037	60.0	73.0	1.9368707229304731	0.013064762520582054	Simulations
0.7606745035790853	0.768121164349113	1.5755204361937323	1.6227682521094888	0.8620937485304035	79.0	82.0	1.882357057890507	0.011128540413737979	Simulations
1.4291408571606974	0.731542461975476	2.230431674566331	2.9303388629320346	1.5011980057713372	53.0	91.0	1.9520002369217004	0.010603881626441755	Simulations
0.9261715611353896	0.5976569285086146	1.8306076715073902	2.1730681779339376	1.246896616798548	56.0	80.0	1.7427813570569854	0.010017394819991416	Simulations
0.8585262083441683	0.6063054323499186	1.827759150572518	2.100751830004188	1.2422256216600196	41.0	58.0	1.691119385540363	0.013068595021115873	Simulations
1.208573012067402	0.6216257868547779	1.479795682891957	2.136080974132989	0.9275079620655869	57.0	104.0	2.3030324929781467	0.011572449672508598	Simulations
0.8687739773914778	0.5776540894017255	1.740078725339434	2.0594218214195714	1.1906478440280936	36.0	53.0	1.7296649313640204	0.014914954486015711	Simulations
1.250190651705121	0.6727119487767017	1.839568489156478	2.3713579927299158	1.1211673410247949	74.0	110.0	2.1150794408285147	0.009824653190252108	Simulations
1.172404562201881	0.5349560277564007	2.303263552091219	2.8615722741373553	1.6891677119354742	57.0	90.0	1.6940723256298347	0.008449949660837168	Simulations
1.0582289031482135	0.8293631151800289	1.8451412642130174	2.1697775505469763	1.1115486473987628	70.0	90.0	1.9520311194878175	0.010721956140910972	Simulations
0.9719538239899829	0.6323265799634533	1.4582657951650333	1.860739476762683	0.8887856527727002	67.0	98.0	2.093575060485987	0.010877231057482986	Simulations
1.2936667249456142	0.7793694999730885	1.980977374908089	2.433743637703813	1.140076912758199	73.0	102.0	2.134718816308484	0.010725941681993723	Simulations
1.129289474940612	0.6244175038289219	1.704479626501044	2.2498651902438467	1.1205757153032347	55.0	95.0	2.007776145349553	0.010585246596427867	Simulations
1.1639009166031513	0.5645712988942506	1.8205148266627842	2.447941777518588	1.2840408609154366	47.0	86.0	1.9064360426765288	0.010824164327743089	Simulations
0.8596224830085155	0.6330802430548947	1.7781362873558413	2.0615964465728918	1.2019739635643762	53.0	73.0	1.7151756269822689	0.0106624152060889	Simulations
0.963374372404842	0.8203143980275536	1.8192683475069182	1.9529592094392991	0.9895848370344571	87.0	96.0	1.973513675989457	0.01021631788339359	Simulations
1.0876547150252414	1.0198468680123858	2.1245848220297843	2.254350567370831	1.1666958523455895	68.0	74.0	1.9322521485257367	0.012841667167722413	Simulations
1.0304367014014977	0.7606244591008946	1.967572415058415	2.2314156155132974	1.2009789141117997	61.0	76.0	1.8579973297562606	0.011759847741251503	Simulations
0.6350724810455819	0.529385302725021	1.5187969578980018	1.6923529629097707	1.0572804818641888	37.0	48.0	1.6006660407896938	0.01413900705705427	Simulations
0.7177766035596442	0.5220787773453623	1.564067979547139	1.775686781145442	1.0579101775857978	51.0	66.0	1.6784853939090039	0.011320605800518985	Simulations
0.839246076499521	0.63245306732939	1.4553155446839596	1.647317293742415	0.808071217242894	84.0	101.0	2.0385793462152932	0.010173902088529774	Simulations
1.0530840542379065	0.7478153392654274	1.7655510886594374	2.0785241139582724	1.025440059720366	69.0	89.0	2.0269581768875686	0.01145299237478295	Simulations
0.9147432211485751	0.5682200336615006	1.7005542513810832	2.1274409996574284	1.2126977785088533	41.0	70.0	1.754304359552265	0.011584272385853061	Simulations
0.8430923411972178	0.5976522423516384	1.6108831033361053	1.9226209983613471	1.0795286571641294	43.0	63.0	1.7809818994634024	0.013217029429620606	Simulations
1.080046136193313	0.7527702833214169	2.3622877222340373	2.621483438203542	1.541437302010229	54.0	67.0	1.7006747110536355	0.011434436154460131	Simulations
1.0615669467773277	0.7716447602259291	1.8496263831292263	2.183364580790728	1.1217976340134004	71.0	94.0	1.9463087767259872	0.010220644766158119	Simulations
0.958992040064027	0.5222383820398624	1.9632172718380563	2.4088510800177376	1.4498590399537106	39.0	68.0	1.6614381216636376	0.01077106709597862	Simulations
1.5211376295327868	0.700107295391734	2.0979575554961967	2.86819344957423	1.3470558200414433	65.0	106.0	2.1292313257560385	0.010286157517015403	Simulations
1.2692422672667536	0.6438985826405087	1.573568531292654	2.1957681810005854	0.9265259137338318	71.0	111.0	2.3698939753900676	0.011214617271153185	Simulations
0.9413226312241854	0.6035283427422395	1.7304671384662964	2.08480758048138	1.1434849492571946	51.0	72.0	1.8232050905747965	0.012034400803796549	Simulations
1.6253764327519313	0.544255234303409	2.0127691729069546	2.994787160750509	1.3694107279985777	41.0	79.0	2.186916678480716	0.014289851326026644	Simulations
0.9878369637961932	0.9692636700339361	2.722301636645406	2.5542166233122763	1.566379659516083	67.0	67.0	1.6306497647584208	0.010529058947609889	Simulations
0.9125226051350563	0.6309052046994703	1.7535640922903968	2.086977191641373	1.1744545865063167	65.0	91.0	1.7769756409650228	0.00911454840476047	Simulations
1.362100250045592	0.8405770744942698	1.9797733276911034	2.5110675680852257	1.1489673180396336	55.0	82.0	2.1854995600480662	0.013755647410999052	Simulations
1.1323274630445053	0.7296156631035553	1.8715252751434843	2.274004456412647	1.1416769933681417	54.0	74.0	1.9918107044479774	0.013433520873371161	Simulations
1.4016949175902857	0.7128153761004694	2.085050039754816	2.7023682047234954	1.3006732871332096	55.0	87.0	2.0776687208512876	0.012126041820878841	Simulations
1.4391098877867132	0.5908934086570365	1.688810041035911	2.5055138210774954	1.0664039332907822	56.0	103.0	2.3494979180598197	0.011964587275114283	Simulations
1.1592228854554043	0.47757820200752144	1.6378505005981845	2.3151717134253285	1.1559488279699242	48.0	94.0	2.0028323550370564	0.010660017733431587	Simulations
0.859518202669677	0.6739479922842737	1.520926839245983	1.6953539582329828	0.8358357555633058	63.0	74.0	2.0283338526124797	0.013787772048190414	Simulations
0.7804150732189932	0.6700333730888672	1.8554953502907157	1.9451052022201571	1.164690129001164	69.0	75.0	1.6700624086925813	0.009865360211871115	Simulations
1.0683873369743178	0.6644116127018547	2.178515867677998	2.522024569226308	1.4536372322519902	52.0	70.0	1.734975214771543	0.011355929330444997	Simulations
0.6287741244379519	0.8237297769222318	2.1210230416756124	2.1179989523380374	1.4892248279000855	51.0	40.0	1.4222157142817506	0.0127035075508317	Simulations
1.4485934981176114	0.9685230203541755	2.2728767719072724	2.7138386345474967	1.2652451364298853	88.0	113.0	2.144911334893629	0.009742637271351948	Simulations
0.6967908827111862	0.48895281565784776	1.5346572595531196	1.7977670791851366	1.1009761964739504	48.0	71.0	1.6328846027214472	0.009963701944705163	Simulations
1.0191816029989902	0.681101898967386	1.479614410745725	1.9136071608309893	0.8944255578319991	62.0	96.0	2.1394817534836412	0.011429805989848696	Simulations
1.2332990287635521	0.7293034835764756	1.683116122125964	2.2107498973860196	0.9774508686224674	67.0	104.0	2.261750404397977	0.011321535859747593	Simulations
0.8174250289578782	0.6688416907385393	1.7395784352364634	1.8886840830636606	1.0712590541057825	65.0	76.0	1.7630507539935907	0.01076413167076991	Simulations
0.6948118854037371	0.6808338993175985	1.7746316189078877	1.6701044974490942	0.9752926120453571	64.0	64.0	1.7124137687730419	0.012125489699630771	Simulations
1.009949486779209	0.47737594423310203	1.7446304204975147	2.2283974889732066	1.2184480021939976	53.0	89.0	1.8288818931629778	0.009786088884351639	Simulations
0.894557410330151	0.6608008210070824	1.5972732975135462	1.8926450399110504	0.9980876295808994	57.0	76.0	1.896271413268371	0.012146914104099345	Simulations
1.3910285430379092	0.4412660427369701	1.6413201422064243	2.565047221736159	1.1740186786982498	49.0	110.0	2.184843621551473	0.01025027294243909	Simulations
1.145802249954878	0.6135590311216375	1.6911492399073464	2.193220764488895	1.0474185145340171	72.0	108.0	2.0939297272825375	0.009872342832734294	Simulations
1.1520110426833414	0.6529559316832867	1.8896272259454174	2.4523211501410067	1.3003101074576653	42.0	75.0	1.885951002054214	0.012203895927528284	Simulations
1.4730660211277002	0.6892889679058776	1.467035154286343	2.3141928308299757	0.8411268097022754	67.0	128.0	2.7513007600472346	0.011407139510348458	Simulations
1.1023534288355539	0.546083581560764	1.4104891438027785	2.0219257754205495	0.9195723465849956	57.0	107.0	2.198767484613201	0.010623318224888866	Simulations
1.2703570262259019	0.7356911853307346	2.144565010005157	2.6207333737566505	1.3503763475307486	67.0	93.0	1.940742948103936	0.010286118767535135	Simulations
1.1648947104750635	0.621221760567731	1.4945124230831475	2.097377362958861	0.9324826524837976	64.0	109.0	2.2492400876007763	0.010728785917302346	Simulations
0.6477949527514146	0.7688590128050727	2.007537681344377	1.7966947928220602	1.1488998400706456	56.0	48.0	1.5638393619339193	0.013439423461923007	Simulations
0.6460557453049178	0.6460557453049183	1.8882989334572062	1.950925047994324	1.3048693026894063	40.0	39.0	1.4951114598016537	0.014878283092737098	Simulations
1.3705073822614557	0.7214046270079628	1.9708164397999435	2.6147966534590044	1.2442892711975486	65.0	102.0	2.1014379163957835	0.010503694460924366	Simulations
1.1943818306764682	0.6857158129187217	1.818338981367912	2.3309906780470593	1.136608847370591	77.0	110.0	2.0508292570830573	0.00942006713135416	Simulations
1.0312599338597157	0.6448326411684189	1.3933034416560446	1.7944103555120376	0.7631504216523218	80.0	113.0	2.351319352778318	0.010915668115424782	Simulations
1.2744699737033824	0.5124208026222103	1.8522197541876948	2.586921165428415	1.3124511917250328	35.0	67.0	1.9710608529588598	0.014611527129606757	Simulations
0.9839641993355166	0.6863796640129154	1.9764567571976328	2.257890776272979	1.2739265769374624	60.0	78.0	1.7723868998015415	0.010585814982314647	Simulations
1.1713845094848754	0.5939116164165275	1.7509492300252438	2.349597666066174	1.1782131565812985	58.0	102.0	1.9942042345578306	0.009762874211403759	Simulations
1.3310806844181609	0.6079325577995303	1.8869492003277701	2.604331506721108	1.273250822302947	60.0	104.0	2.0454190652008504	0.009926888967584804	Simulations
1.1025788542143073	0.7760472820336262	1.9829407427421368	2.3073204365008055	1.2047415822864982	71.0	91.0	1.9151994671933756	0.010302139077337963	Simulations
1.1402482408458305	0.6440937876546511	1.5617428897229253	2.095252706082517	0.9550044652366864	66.0	103.0	2.193971632963238	0.011005290024108804	Simulations
1.2529064881663714	0.6734020039663604	1.6819600473827618	2.2525438992708438	0.9996374111044724	66.0	100.0	2.2533609429263644	0.011720784227000259	Simulations
1.090197601026391	1.0270109406098782	2.2768635628579346	2.407861903882495	1.3176643028561041	64.0	70.0	1.8273712801229665	0.01242528266344493	Simulations
1.1072324809407166	0.631998085688799	1.7737529888763761	2.1925624124399334	1.0853299314992169	71.0	100.0	2.0201805449253984	0.010144842333874339	Simulations
1.0605422100380375	0.49313341053760884	1.5750352096227698	2.1826656209365	1.1221234108984626	44.0	87.0	1.945120830505516	0.01103287101050662	Simulations
1.2673232063888198	0.7320067480077213	1.698019457190701	2.273892677386915	1.0065694709980952	63.0	98.0	2.2590519014372314	0.011997116498483479	Simulations
1.2515578729377692	0.7183689746375694	1.9329713052249802	2.4780936291008784	1.2265357561631092	51.0	76.0	2.02040064192905	0.013350544806054585	Simulations
1.033065518950668	0.48752892789292557	1.8512313460883068	2.3676653320169145	1.3345998130662466	45.0	78.0	1.7740638870443097	0.010603307236738196	Simulations
0.684435067186371	0.7681155485223294	1.972835826069194	1.977539656246602	1.293104589060231	46.0	41.0	1.5292959850090602	0.014947991651188666	Simulations
1.379672775452782	0.6602976976374548	1.7247148875329248	2.4765707864680584	1.0968980110152764	57.0	102.0	2.257794946839016	0.011518769277977917	Simulations
1.0656515450976003	0.5544976496295061	1.4110496245319004	1.8989063007121572	0.8332547556145569	71.0	109.0	2.2789024460012137	0.010902194200289506	Simulations
1.0523021839906612	0.8139738179287686	2.164025865890327	2.3106374049190337	1.2583352209283725	71.0	79.0	1.8362653818227352	0.011098412352390351	Simulations
1.2976978730208155	0.8920591023169654	2.0370820576981807	2.3590977353677545	1.061399862346939	86.0	105.0	2.2226286426600628	0.010973970691977274	Simulations
1.3578483581383551	0.7271471171122583	1.735499017150136	2.3321806301064596	0.9743322719681043	67.0	96.0	2.3936194019269905	0.013116601816858385	Simulations
1.0758461152059244	0.6065276699058978	1.4137254152473284	1.8677072633978444	0.79186114819192	78.0	115.0	2.358629751772057	0.010764773633702917	Simulations
1.4551061740974294	0.7062277153990892	1.9784583853185713	2.7155832315433535	1.260477057445924	44.0	78.0	2.1544090909880405	0.014196054137488211	Simulations
1.3350479206120778	0.5621974813697199	1.6890627962271403	2.4706756223337165	1.1356277017216387	42.0	84.0	2.1756035174098987	0.013350186469010579	Simulations
1.0837679295169744	0.6855253198020643	2.0522330229856016	2.3545785430392594	1.270810613522285	69.0	86.0	1.8528162402681803	0.01034557911601373	Simulations
1.3496881151902573	0.5384419075055747	1.318541824987552	2.2337610785502213	0.884072963359964	53.0	132.0	2.526670502467013	0.01013058740808738	Simulations
1.0695950506034435	0.695419798895133	1.786690141067789	2.258783362799593	1.1891883121961493	45.0	70.0	1.8994328649498369	0.013222410302214783	Simulations
0.7756752950314512	0.7600674154704141	2.1615147248342472	2.0749638070034084	1.2992885119719573	62.0	62.0	1.5970000410872507	0.010892973384943114	Simulations
0.9089513875896698	0.6727797738035648	2.0579419325743546	2.2816068305026866	1.3726554429130169	60.0	74.0	1.662184667159236	0.00990649558216089	Simulations
0.9024105419958239	0.810721210951592	2.0339951707898964	2.1226982409350343	1.2202876989392104	97.0	104.0	1.7395063826180373	0.007679595889632275	Simulations
1.0376967803917676	0.6054740908456528	1.4421827243234053	1.9522622768800455	0.9145654964882778	54.0	89.0	2.134633642288372	0.012292005480166552	Simulations
1.3638080976723312	0.5802624390677749	1.9352467138800709	2.75348831673639	1.3896802190640587	34.0	72.0	1.9813826799598888	0.013701493696313904	Simulations
1.1432245874261147	0.741869919909038	2.010338906251725	2.3719894399904056	1.228764852564291	63.0	84.0	1.930385162824552	0.011296294428323068	Simulations
1.3426015531345143	0.8109507468147906	1.859385103798293	2.324225804382615	0.9816242512481006	97.0	127.0	2.3677347023847912	0.009791397168060602	Simulations
1.0457187601952653	0.6652559722698765	1.5825512314020818	2.0478850002573306	1.0021662400620652	68.0	107.0	2.0434583788518985	0.009635634194895456	Simulations
0.8612781654300272	0.7559252382315799	1.843758308331669	1.8803413663583493	1.019063200928322	88.0	90.0	1.845166585002226	0.009819456347814266	Simulations
1.4355806635338397	0.7469415076060388	1.8600121527994	2.5813875836713067	1.145806920137467	64.0	107.0	2.252899278494153	0.010951241268404561	Simulations
1.0477548960240208	0.7319983378207637	1.7033929788839686	2.06074773117311	1.0129928351490893	66.0	90.0	2.0343161961948284	0.011383821515961828	Simulations
1.2742899629190112	0.47955013197929763	1.4561872394194395	2.2536681954648916	0.9793782325458803	47.0	92.0	2.3011213855616455	0.013068881397998045	Simulations
1.0233079075829745	0.7105767304432831	1.7746933210665552	2.1485666169824102	1.1252587093994357	64.0	88.0	1.9093979002651988	0.01060361111276891	Simulations
0.9708013359412644	0.9127121013905162	2.179137028777683	2.2088227896986137	1.2380214537573493	82.0	83.0	1.7841555031174283	0.010063148950646198	Simulations
1.0375977009766773	0.7881212443884864	2.0984206169879602	2.3444445023960503	1.306846801419373	63.0	76.0	1.793970417840666	0.011094159220317186	Simulations
0.6560466260807136	0.7417652261133009	1.8772287927324918	1.6537743425394247	0.9977277164587111	67.0	60.0	1.6575407450935165	0.01215073891007411	Simulations
0.8359392500784453	0.6575013202267568	1.666854190850368	1.8451788652928567	1.0092396152144114	71.0	84.0	1.8282862042636439	0.010362999178359178	Simulations
1.2233839603004557	0.6020813482759928	1.4722225512569478	2.13055676961908	0.9071728093186243	70.0	126.0	2.348567712494973	0.009776041183436727	Simulations
1.0674242537651177	0.7875973185225325	1.965466635074017	2.268959707544261	1.2015354537791434	62.0	80.0	1.8883834849881367	0.011464397136281366	Simulations
1.124505257488467	0.7723066004346673	2.058138873587085	2.3086710499530363	1.1841657924645692	84.0	100.0	1.9496180894974744	0.009631915422567928	Simulations
1.4570513009755335	0.4979640757118251	1.6023109854009938	2.503298612241074	1.0462473112655404	62.0	120.0	2.3926452047108104	0.010488387346329564	Simulations
1.361571125104092	0.6045787901190365	2.0105490962053136	2.7766809789808713	1.4151098538767792	45.0	87.0	1.962166379785983	0.011177556074907252	Simulations
0.925331612296908	0.6152597279780476	1.663643134133225	2.0079530692100245	1.0826214569131165	59.0	88.0	1.85471390428129	0.01012723481311305	Simulations
1.2375457459368788	0.7483585580857538	2.086354291014592	2.4265579388526675	1.1890121929157886	67.0	85.0	2.0408183812666145	0.012107621155222719	Simulations
1.0918227197455515	0.6673099810165879	1.7406379222253232	2.2378242967661546	1.1460015770206031	43.0	72.0	1.9527235752886947	0.013409551914792558	Simulations
0.7873314781868521	0.7285633541987868	1.9339906047630808	2.0171959226454304	1.2298644444585782	50.0	54.0	1.640177445355336	0.013219479697706768	Simulations
1.034876245621875	0.7949686095297717	1.6788387823697024	1.953447282382633	0.918571036760758	96.0	119.0	2.1266153669195305	0.009147555646724021	Simulations
1.346142726282731	0.8633388106398134	2.592494738093896	2.923713448057605	1.577570721774874	63.0	77.0	1.8533010328489294	0.011559704392977094	Simulations
1.224954879299179	0.6890292896443262	1.9111448248241392	2.4655743873626568	1.2406195080634779	62.0	96.0	1.9873735430867516	0.010321490254052474	Simulations
1.4996150612530224	0.7593132503733513	1.8995750686092598	2.6410453554672992	1.1414302942142769	63.0	103.0	2.3138034524353572	0.011750158436560382	Simulations
1.8636699730208004	0.6188181479482691	1.9268693327918582	3.1649425665516984	1.301272593530898	48.0	109.0	2.4321902899406207	0.011763817494607913	Simulations
0.6696663877969714	0.5167020777409467	1.3176559294790005	1.504881955143246	0.8352155673462746	56.0	72.0	1.8017886806452834	0.01179763635183522	Simulations
0.875888808286408	0.5601174138549758	1.5870119030391678	1.917973094041574	1.042084285755166	45.0	64.0	1.8405162809375624	0.013751726744492732	Simulations
1.2436001045527736	0.9334273026176629	2.6279716112781912	2.725113083311741	1.4815129787589674	77.0	81.0	1.8394122241132924	0.010854874484250009	Simulations
0.9301358837642232	0.6622340098813024	1.5525078902640963	1.9104032431947433	0.9802673594305201	56.0	83.0	1.9488593849585887	0.011597951811122692	Simulations
1.2023151460143429	0.7595549979222725	1.630217932619956	2.113834214637798	0.9115190686234552	64.0	91.0	2.3190235809658244	0.013335357033925143	Simulations
1.1548802928120827	0.6452948711053001	1.8900426086634063	2.370069972859752	1.2151896800476691	48.0	69.0	1.9503703921899496	0.01396736420649102	Simulations
1.132281736607142	0.4032908948120164	1.406835921555492	2.1606567764030262	1.0283750397958842	31.0	75.0	2.101039691542768	0.014281378890281143	Simulations
1.263711022063801	0.500530240974806	1.9048410774958047	2.648253819275779	1.3845427972119781	44.0	88.0	1.9127280316711819	0.0106321790150198	Simulations
0.8236770494430512	0.6839496301545538	2.1264954255743254	2.241805580789563	1.4181285313465117	42.0	47.0	1.5808197432294593	0.014056869580964283	Simulations
0.8460464388842037	0.633273314183393	1.8904351645847035	2.144345671495983	1.2982992326117795	38.0	52.0	1.6516575051671394	0.013921433736482896	Simulations
1.3335993646734863	0.6470564662970517	1.8238511186369142	2.5133844026480583	1.179785037974572	59.0	103.0	2.13037487486956	0.010593274941379849	Simulations
1.0231095074789394	0.902068626558645	1.5909817774471011	1.7320344807623045	0.7089249732833651	106.0	116.0	2.4431844638515665	0.011110024079441068	Simulations
0.9825910163998628	0.5429153850735577	1.8734361618507958	2.295174670341425	1.312583653941562	46.0	72.0	1.7485930618206593	0.011197146940414612	Simulations
1.6849118360345339	1.112194895621596	2.109722011995567	2.719434318948079	1.0345224829135453	71.0	99.0	2.6286855663970536	0.014084258408630859	Simulations
0.861201414060614	0.8045229150891313	1.4371647121639721	1.6147325643857366	0.7535311503251226	87.0	102.0	2.142887608148695	0.01077996259212547	Simulations
1.2499145155003475	0.566754055037713	1.8049011697126387	2.4137580796174225	1.163843564117075	66.0	102.0	2.0739540553704643	0.010317489551525326	Simulations
1.2120988483912418	0.7018253782338837	1.5608349318533428	2.0558169845524565	0.8437181361612146	79.0	112.0	2.4366158512439973	0.011472132307894319	Simulations
0.666153779796478	0.9525151751624068	1.9872909754179804	1.809323867553772	1.143170087757294	67.0	50.0	1.5827249916093928	0.013248211998844685	Simulations
1.1260209776346635	0.6799920563460924	1.8139615792834767	2.2844264146219118	1.1584054369872483	69.0	104.0	1.9720439335671547	0.009420112429869308	Simulations
0.9238476288203612	0.5225139857470349	1.4531557641936184	1.926218701416608	1.0023710725962467	46.0	85.0	1.9216623005964233	0.0110865274037214	Simulations
1.3037669695961716	0.9661913744127809	1.910408504793113	2.2537050207864007	0.9499380511902291	104.0	127.0	2.3724757819340017	0.009814120947968448	Simulations
2.106664225643457	0.5916373918122506	2.514875223357535	3.8762406360718393	1.7695764104283822	45.0	98.0	2.190490680836705	0.01154340894807984	Simulations
0.9955398142070548	0.5261959880196079	1.6647426099446752	2.2125076897866545	1.2169678755795996	38.0	76.0	1.8180493784463405	0.011347255050528698	Simulations
1.2124881624048849	0.6429746995115844	1.7983074173203182	2.408021234525093	1.195533072120208	59.0	103.0	2.0141820336718985	0.009807709458375634	Simulations
1.5110184830176052	0.792244065217406	1.573958874294146	2.318124801903438	0.8071063188858327	79.0	128.0	2.8721430469079783	0.011891621908501697	Simulations
0.6513988635766741	0.6410869748745944	1.7956489919629817	1.8293195872798977	1.1779207237032236	44.0	45.0	1.55300738875598	0.01411254874807914	Simulations
1.2527629360887844	0.8129210051736486	1.858685905848925	2.3612706457787893	1.108507709690005	76.0	113.0	2.1301346171413824	0.00965437705017361	Simulations
1.0912308405417641	0.8250231427959105	2.0438966686865907	2.3008065402761453	1.2095756997343812	74.0	91.0	1.9021600225445954	0.010193830995076555	Simulations
1.6522409626871397	0.7471441574538588	1.6243952220517963	2.5072119790220713	0.8549710163349314	84.0	134.0	2.9325110806327976	0.011583108653403076	Simulations
0.7591074023694611	0.687706575558787	1.7416720639575267	1.8259196753655145	1.0668122729960534	72.0	78.0	1.711566056732335	0.009939961195639562	Simulations
0.4481149391628494	0.6673466117779043	1.7108641232971584	1.451141525128085	1.0030265859652356	59.0	42.0	1.446762773223621	0.01268639003511194	Simulations
1.1985475179452973	0.5314327075400376	1.5126583090564605	2.1983249577803723	0.9997774398350749	45.0	83.0	2.1988143262594644	0.013695491377383566	Simulations
0.784561283078578	0.6833461877897617	1.7819374100801892	1.8997689302094152	1.1152076471308372	49.0	55.0	1.7035113909925803	0.01397293808071962	Simulations
0.8824817502270308	0.8948896856466395	1.754859361635393	1.9492993697234886	1.0668176194964578	97.0	95.0	1.8272095755632212	0.00915412754034708	Simulations
1.1734392812630148	0.668607799014608	1.8810761563046812	2.360613074501335	1.1871737932383204	65.0	96.0	1.9884309171466452	0.01032948375345931	Simulations
1.1869876199503524	0.8112468990492675	1.4894729836824225	1.9635717575316318	0.7765841375812794	88.0	126.0	2.5284726567391664	0.010621160135249103	Simulations
1.3102555170535743	0.8143391965028198	1.7322860584450999	2.2185424289334117	0.9082869118798372	83.0	113.0	2.4425568616218443	0.011401700423666464	Simulations
1.3663559811887813	0.55568038270543	1.5484229793513402	2.329123332137604	0.9627673509488229	68.0	118.0	2.419196423561949	0.0108010839987597	Simulations
1.3237111580378713	0.505644074436687	1.5528718297103166	2.3302726923228727	1.0065615342850014	62.0	114.0	2.3150822010878382	0.010623363331875718	Simulations
1.0795974468098342	0.7220086144531623	2.307789624905537	2.5964221634077878	1.5168247165979536	62.0	79.0	1.7117483220020537	0.009816083521280753	Simulations
1.080026043610061	0.5874750608363323	1.39028000318235	1.9187187532179146	0.8386927096078537	60.0	99.0	2.2877494119569097	0.012059889247881497	Simulations
0.7161719988272938	0.6963118008584659	1.5312531331346009	1.596696368018398	0.8805243691911043	107.0	114.0	1.8133471643552657	0.007532062760765314	Simulations
1.6118320911070323	0.7173252237668222	1.8239251924629176	2.694913855707184	1.0830817646001516	73.0	131.0	2.488190590764939	0.010038908377512626	Simulations
0.6996629388081907	0.7363489567144701	2.535483917081137	2.2630092349487616	1.5633462961405709	49.0	46.0	1.447541878939712	0.011600110598560504	Simulations
0.9919791116160805	0.6277922389435289	1.7058333781186792	2.090382011625761	1.0984029000096807	60.0	87.0	1.9031104266087953	0.010670796268724725	Simulations
0.9815910015949323	0.5644574150580846	1.9192597528193998	2.3465044222615763	1.364913420666644	43.0	66.0	1.7191599018167092	0.011843996036877672	Simulations
0.9601008066082688	0.4994275737139977	1.813901517404066	2.2709779690491283	1.3108771624408595	44.0	72.0	1.732410964289405	0.011010850114551142	Simulations
1.0735042215306276	0.7855865597670553	1.8470106189098334	2.1348620942545677	1.06135787272394	53.0	67.0	2.011444159523229	0.015048234138899235	Simulations
0.9780858414592375	0.6119979388849537	1.7092252700251143	2.115051896320246	1.1369660548610083	46.0	70.0	1.8602594926009524	0.012792912582614667	Simulations
1.0929147851854997	0.6897479794392511	2.181230148842602	2.5655155157361365	1.4726007305506368	56.0	80.0	1.7421664015994585	0.010011030354441345	Simulations
0.7641439641031065	0.8545278943776565	1.8852949311381006	1.5872896972010888	0.8231457330979823	91.0	83.0	1.9283216001462857	0.011413803377412211	Simulations
1.6987879849583771	0.5708005783512811	2.1589480407651664	3.195714113197738	1.4969261282393609	53.0	107.0	2.13485091409049	0.010225563772936118	Simulations
0.9310741528169291	0.7457081155536496	2.1860461776799784	2.3326581669954014	1.4015840141784723	67.0	76.0	1.664301350042631	0.009669956336655204	Simulations
1.1864760395548826	0.7344098112084076	1.948396796779611	2.3962016903129895	1.209725650758107	61.0	86.0	1.9807810876882255	0.011465923779230626	Simulations
1.0399734973497174	0.5027658062596461	1.6924398864135746	2.220975471223172	1.1810019738734547	49.0	85.0	1.880585740207367	0.010719789219365047	Simulations
1.4750793647674152	0.6861711943283684	2.0005470355292627	2.8318197728401926	1.3567404080727774	40.0	81.0	2.0872229912151994	0.013105984456236739	Simulations
1.282022434861471	0.57568126603354	2.1934870052147404	2.823029575731915	1.541007140870444	45.0	73.0	1.831938023426235	0.011963982140071302	Simulations
0.9435314752170685	0.45135139639882915	1.7285271172504744	2.177075179382111	1.2335437041650423	56.0	92.0	1.7648950515747825	0.008908504315784046	Simulations
1.481819927894525	0.8081306612676464	1.6124878214648983	2.3305583615766325	0.8487384336821077	69.0	108.0	2.7459088325550436	0.013493367843387415	Simulations
0.8675147846847957	0.9090957541591698	2.2687596380551276	2.1431608126518515	1.2756460279670558	57.0	54.0	1.6800591744618356	0.013861334222287821	Simulations
1.2460129330079646	0.804991084154737	1.959508694717932	2.3936407376890076	1.147627804681043	58.0	79.0	2.08572912570227	0.013424706414737376	Simulations
1.199775373629337	0.64786901925504	1.9277008435964202	2.4931878493411177	1.2934124757117806	41.0	67.0	1.9276046088615977	0.014131479935041848	Simulations
0.5262683476046619	0.6484024363514829	2.0650404846603725	1.7736845946274729	1.247416247022811	45.0	37.0	1.4218867189366007	0.013724500829264134	Simulations
1.1621121177169331	0.5876048354686702	1.499228342212274	2.0927557204296945	0.9306436027127614	57.0	104.0	2.2487187515494194	0.011241377247714283	Simulations
1.1189235984765995	0.5328825771057919	1.7632726417512454	2.401131497758247	1.2822078992816475	33.0	66.0	1.8726538021669283	0.01371339716589499	Simulations
0.8078216184706093	0.45837384545435755	1.461247524894949	1.825167522885016	1.0173459044144066	53.0	83.0	1.7940481354132924	0.010159260230969282	Simulations
1.317334415755638	0.7935155599992751	2.0271736330444474	2.5422975409281654	1.2249631251725275	71.0	104.0	2.075407405076051	0.01012879391447419	Simulations
1.186683179156786	0.5526987972840536	1.8713890092843026	2.4672609289447016	1.2805777497879156	49.0	78.0	1.9266779618444252	0.012129685254492165	Simulations
1.263537632502495	0.6707102883232907	1.969566120053254	2.525006241185502	1.2614686086830071	54.0	85.0	2.0016401706750737	0.011778619390348338	Simulations
1.3572042556612371	0.5486884158698544	1.8304123099065324	2.637303411915031	1.280099156253794	46.0	89.0	2.0602336928594585	0.011716943730058027	Simulations
1.2646895214026874	0.610022546579922	1.8457045530386669	2.508681009559337	1.2439914881566496	50.0	87.0	2.0166384042359553	0.0116316370457238	Simulations
1.041052838498051	0.7553351408667608	1.870840311182608	2.112333515946556	1.071280677448505	65.0	79.0	1.971783455459639	0.012398748370189967	Simulations
0.7540931280798132	0.5311600707199273	1.3769795414220132	1.6499439136163765	0.8958507855365633	56.0	77.0	1.8417619767204363	0.011442683432456016	Simulations
1.1564956896043703	0.5102064064420311	1.9163440224309638	2.485791644410934	1.3292959548065635	55.0	91.0	1.870006175391289	0.009923549828423478	Simulations
1.5298398214328064	0.4191879238397447	1.5955351034706504	2.6722763807667866	1.1424365593339803	39.0	94.0	2.3391026476994705	0.01304207631271463	Simulations
0.9796583214890833	0.8631392195343428	2.2602616615929763	2.3484190953437056	1.3687607738546224	62.0	66.0	1.7157264733195328	0.011800296546141845	Simulations
0.8978027284004901	0.6006403762743737	1.7275959579630178	2.0762454668445294	1.1784427384440392	51.0	73.0	1.7618552001821548	0.01119308712064335	Simulations
0.7717136708368585	0.5641408987519899	1.5329044868788297	1.7243391613740606	0.9526254905372021	64.0	79.0	1.8100913512210088	0.010836234287406122	Simulations
1.133851624145168	0.7043139336182802	1.8276136755120587	2.2389699381513197	1.1051183140061518	66.0	92.0	2.0260002117192824	0.011072112227198914	Simulations
1.1890868309513687	0.7286012476230392	1.951738014253216	2.424140775358516	1.2350539444071473	69.0	97.0	1.9627812909193665	0.010029890978617584	Simulations
1.0305662665376059	0.8305278824733731	1.8284762120195115	2.1092171055543236	1.0786508390167178	66.0	83.0	1.9554215592851667	0.011656381497269067	Simulations
0.8638146883845834	0.663638211595446	1.764794517034918	1.9141444861841093	1.0503297977995258	59.0	68.0	1.8224223383877165	0.01273319611967421	Simulations
0.9616246194618074	0.8406310224544833	2.1529238336842957	2.2488174061248145	1.287192786663007	71.0	76.0	1.7470711686901064	0.010591294461527194	Simulations
0.9477698614582915	0.5806948972632191	1.3909845632800992	1.8336132457783196	0.8858433843200282	68.0	109.0	2.069906800947436	0.009629044135762039	Simulations
1.1292072812391802	0.5839647301300253	1.690478832313911	2.2703773778482903	1.14117009660911	55.0	98.0	1.9895170620002431	0.010126717056798485	Simulations
1.1635392181454995	0.5891413151331663	1.4857567999172365	2.0685937278686604	0.9050545097231608	62.0	98.0	2.2856012600847704	0.012169119762914479	Simulations
1.2337254973472613	0.517422298012667	1.8530274506027162	2.5664704982854882	1.332745000938227	48.0	93.0	1.925702588626288	0.010165429098590478	Simulations
1.4010540208082538	1.0169168418400978	2.166381581166282	2.4519360199646534	1.0508819991563996	93.0	107.0	2.333217261246226	0.011423557499313904	Simulations
0.959607020700896	0.6810174851684196	1.5158585258971122	1.8568245138993233	0.8972174931984274	67.0	93.0	2.069536681992301	0.01128287978692725	Simulations
1.1696482426938897	0.7202344194814783	1.5718680001513585	2.012134603169466	0.8424863604755763	86.0	121.0	2.3883289956571323	0.010380178376447037	Simulations
0.6448750880867249	0.6183644653000806	1.7982256380170425	1.8388533019051017	1.1939782138183768	53.0	55.0	1.5401062436678772	0.011327815966267252	Simulations
1.296287471046784	0.5740810762392776	1.8280304793864701	2.526464134401027	1.230176663354243	52.0	94.0	2.0537409054015714	0.011045257303092531	Simulations
1.4759158110761428	0.5672152204455568	1.2902976904142223	2.23435171102283	0.7584358999466875	79.0	158.0	2.9459994063834385	0.00986555151691061	Simulations
1.0035434306912578	0.61111979333156	1.8736489543861898	2.2983436652179274	1.2948002345266696	43.0	65.0	1.775056571609377	0.012736384684511158	Simulations
0.8317223825381643	0.9482779432885475	2.4426876298085856	2.3730047420629865	1.5412823595248222	71.0	63.0	1.5396301186465176	0.009882282522454724	Simulations
1.1516984334800853	0.7679493435381375	1.966007310921245	2.345465889266967	1.1937674557868818	77.0	103.0	1.9647594495034493	0.00945973485895739	Simulations
1.5206498810769051	0.6960622736144266	1.8842016850711734	2.688787099856266	1.1681372187793608	62.0	111.0	2.30177333332971	0.010835547489713097	Simulations
0.7382383671264123	0.5736532169440376	1.785544563917627	2.0088441822861625	1.2706058151597501	53.0	70.0	1.581012898192659	0.00944070196449359	Simulations
0.7598730095228257	0.6151719700269191	1.4131643631313549	1.627912469883177	0.8680394603603514	70.0	88.0	1.8753899381571635	0.010308984061348605	Simulations
0.9213083234727892	0.660860754910036	1.799587542555769	2.121928622992739	1.20062029951995	55.0	75.0	1.767360275218702	0.010954615497268205	Simulations
0.8767964133220085	0.658405825123199	1.7377160303211796	1.9431692214745202	1.0663728081525117	65.0	79.0	1.8222231536839881	0.010958223363896458	Simulations
0.9384926303952281	0.6859732438768444	2.026892394634833	2.333286822580803	1.394794192185575	41.0	57.0	1.6728538415582699	0.01302300704527121	Simulations
1.0474945410107912	0.7480944485244101	1.9862390295463677	2.3180339765685027	1.2705394355577115	51.0	69.0	1.8244486646343148	0.01257189214069746	Simulations
1.819269743451065	0.6609054629612958	2.354753914746836	3.562461113501704	1.743191370050639	34.0	89.0	2.043643156286516	0.011585879854369728	Simulations
1.5782381067251925	0.6519123706628045	1.7381305021839997	2.69622377663576	1.1179856699105675	48.0	101.0	2.4116800860707297	0.012574639046550146	Simulations
0.9090427340882394	0.5933910302486207	2.0491960186880465	2.400315930724254	1.4912731966360147	47.0	71.0	1.6095749163458717	0.009671545456860844	Simulations
1.1490709603684675	0.600961107527523	1.8321425689236464	2.329677522879121	1.1806065625106537	62.0	93.0	1.9732886440380923	0.010544107555077953	Simulations
1.200475183880204	0.48825585717742404	1.4524035601171141	2.186426029900223	0.9859508460200191	54.0	108.0	2.2175811692095544	0.010638767702451467	Simulations
1.5197743495694822	0.5183653526971446	2.155386159708636	3.0891582306092453	1.5693838810397631	47.0	91.0	1.9683891671950822	0.010736433866980108	Simulations
1.0366648527796731	0.6837786896696476	1.8504415952025277	2.1634452783395064	1.1267804255598333	67.0	87.0	1.9200238389521305	0.01081751981047449	Simulations
0.9459096383393739	0.6065402630884382	1.5090168547057197	1.867903468834895	0.9219938304955211	62.0	89.0	2.025939227631273	0.011444841551381096	Simulations
1.185419714442418	0.6535490206519436	1.9337154998285027	2.4162679460862124	1.2308482316437945	62.0	94.0	1.9630916988516878	0.010352420901589752	Simulations
1.0977105067487303	0.639882163419479	1.5658174048686464	2.020433922148371	0.922723415399641	81.0	119.0	2.189641975513649	0.009501638626850852	Simulations
1.3244478373858513	0.6161206137255173	2.03970658741963	2.667999732596949	1.3435518952110976	52.0	88.0	1.9857809304625	0.011246664486888464	Simulations
0.9526792124707155	0.6122332429766295	1.5713740758607109	1.9318789536694834	0.9791997411987678	48.0	69.0	1.97291611954923	0.014207675648989287	Simulations
1.0933819140962857	0.9423242620196742	1.8340785119225436	2.00231807050281	0.9089361564065244	84.0	94.0	2.202924876945117	0.012121492529837442	Simulations
0.7279539676361468	0.6000839224372194	2.0027742382341303	2.146805979735473	1.418852012099326	40.0	48.0	1.5130584172475252	0.012447243525783951	Simulations
1.117941142555224	1.154968288870817	2.1097825069692826	2.148029963914317	1.030088821359093	89.0	86.0	2.0852861611295026	0.01232843460970377	Simulations
0.9351214658445037	0.7721112530692922	2.1326052680819405	2.2350969663349227	1.299975500490419	60.0	65.0	1.719337760974516	0.012028507502172141	Simulations
1.1686637285743096	0.4947939583088934	1.7946088565070863	2.516503594627895	1.3478398660535855	37.0	86.0	1.8670642247703388	0.010474087853453582	Simulations
0.7487266433610165	0.5813817651300499	1.5699998096399204	1.7620883399688358	1.0133616966078194	52.0	66.0	1.7388542964149363	0.012092985608435235	Simulations
0.7824640089451409	0.5068377432861477	1.4756665304661678	1.7826940514995158	1.0002300425543749	48.0	71.0	1.7822840503239576	0.01174263779912258	Simulations
1.1193457347833944	0.5352283019046009	1.8823823518834755	2.4258624943396505	1.3065167595562561	43.0	70.0	1.856740433366938	0.012753887785939205	Simulations
1.4682879667596045	0.7190100659993042	1.9601316844535193	2.740851726840132	1.2725637600805273	65.0	113.0	2.1538030649770286	0.009795454351550948	Simulations
1.0938365927403957	0.5824292675424894	1.7397911878222576	2.290467300563101	1.1966307078227054	43.0	75.0	1.9140970439666003	0.012488853009984157	Simulations
0.8874381051631557	0.6087755519376501	2.0335934811152643	2.34064838807449	1.4532102829113345	50.0	71.0	1.6106742538218755	0.00968541901182023	Simulations
0.9015205151702057	0.5943037465636924	1.593464537212954	1.9184974178471064	1.0169769026769007	56.0	78.0	1.886470983556471	0.01173961422746041	Simulations
1.0467673185049957	0.6238129270023349	1.7489085579999941	2.2033805425189925	1.1566132240139968	67.0	104.0	1.9050279702597697	0.008940501730833602	Simulations
0.8256331818532092	0.7451871945499331	2.0934343833171494	2.152703356905044	1.3270701750518348	47.0	49.0	1.622147341847209	0.014242956478730237	Simulations
0.7218487784791237	0.5959107850976221	1.53533185473012	1.670241356781642	0.9483925783025184	66.0	76.0	1.761128666539257	0.010743425198331637	Simulations
1.3004852941201133	0.5473456428709398	1.6635738797070412	2.426683896017011	1.1261986018968977	47.0	92.0	2.154756622792515	0.012038314432834027	Simulations
0.9413603490591942	0.589212163276406	1.6560390098514735	2.0341826093997217	1.0928222603405275	54.0	81.0	1.8614029776130867	0.011066548397331778	Simulations
1.181753894331609	0.5818183205649639	1.6085717122604575	2.2785571879573614	1.0968032936257524	40.0	77.0	2.077452904453844	0.013698906125790378	Simulations
1.3514514719744837	0.7990842759997383	1.9914626280173098	2.514530082673593	1.1630786106991093	64.0	91.0	2.161960558420162	0.012223518720924876	Simulations
1.1300039834763163	0.5545281739828128	1.295764304960118	1.9382920721888548	0.8082880887125385	53.0	105.0	2.3980213234073693	0.012017566546427242	Simulations
1.319091037263584	0.6091579491206047	1.9783831477530172	2.6543881545744843	1.3352971173109003	67.0	110.0	1.9878633153346776	0.00901107782901695	Simulations
0.6308214354045558	0.46749828491128764	1.7818852847782938	1.9499990340647033	1.3191775986601475	43.0	56.0	1.4781929560093074	0.01006847507255745	Simulations
1.098621704775421	0.6684549910418358	1.8413904190042458	2.2406763766647613	1.1420546718893403	51.0	71.0	1.9619694501647047	0.013694402500295145	Simulations
1.0982311975294548	0.5803850918961444	2.0087869180734006	2.487895383142374	1.389664185612919	66.0	97.0	1.7902853141783126	0.008661747682745101	Simulations
1.0600989743504454	0.6624763443161787	2.118610449178496	2.44271666254375	1.3826176881933046	57.0	76.0	1.7667332650254886	0.010803740045662797	Simulations
1.1295637845605706	0.8034399406517336	1.9664716598577905	2.3160713609920003	1.1865075764314297	64.0	85.0	1.952007224393691	0.011352451674542097	Simulations
0.9816239663633901	0.6314944476949491	2.233563219872883	2.610261356931021	1.628637390567631	46.0	67.0	1.602727146047693	0.010157146819067533	Simulations
0.7258010553788066	0.7354657622294802	1.841290759201161	1.886579136033087	1.1607780806542805	55.0	57.0	1.6252711586091493	0.012292639228335053	Simulations
1.2833786771650124	0.6244646988395435	1.8740101491004297	2.5199468813998056	1.2365682042347932	59.0	100.0	2.037855148442205	0.01027051507808442	Simulations
1.3345284500495072	0.6233282065585057	1.625416788627657	2.442883942738784	1.108355492689277	55.0	126.0	2.2040617463007757	0.009048925724259315	Simulations
1.499860162452647	0.5919054974571041	1.673981602460644	2.605453858664825	1.1055936962121777	58.0	126.0	2.3566106315468756	0.009815185797966955	Simulations
1.2239571993323328	0.9023731075604589	1.5497331635810578	2.005354627292761	0.7813974279604282	93.0	126.0	2.566369628995396	0.010791499792251786	Simulations
1.3562052732137386	0.6264931433389407	1.7112853821319811	2.411003975679945	1.0547987024662062	73.0	120.0	2.2857479536548717	0.009938886069047236	Simulations
1.161404444523415	0.7926892922861548	2.2549652534122897	2.6053390640626444	1.4439346195392293	53.0	70.0	1.8043331247878995	0.012163796008346097	Simulations
1.1172508851617515	0.6093150998047587	1.8163044535211408	2.3311882719285815	1.21393738676683	47.0	78.0	1.9203529748246813	0.012068865553170795	Simulations
1.1338628299869487	0.5536228414346984	1.364890281683322	1.985655324304032	0.8517924943170833	53.0	100.0	2.331149120885378	0.012210412949346829	Simulations
1.211795219968569	1.1322791409483155	2.1227151883041113	2.212743919408839	1.0009486994402699	86.0	90.0	2.210646680140755	0.012716316252448828	Simulations
1.311259360529723	0.6477039178592372	1.65764786450118	2.3652952183582547	1.0540358578285318	58.0	109.0	2.2440367666723495	0.010698131316479993	Simulations
1.0700370274495332	0.662319233384423	2.2335907945740496	2.658100196856673	1.5880631694071397	43.0	64.0	1.6738000402395847	0.011611362301180523	Simulations
1.0797500807091691	1.012182711565913	2.2002816597324113	2.3120520875628605	1.2323020068536914	79.0	85.0	1.8762057309847142	0.010680212140039733	Simulations
1.4580990826306206	0.6649100749484851	1.8145600925216936	2.646673049255269	1.1885739666246484	61.0	116.0	2.22676343549016	0.009956450851511083	Simulations
0.650580979987696	0.49606359698731883	1.7094678029714239	1.8335077971327813	1.1829268171450853	52.0	61.0	1.549975679440449	0.010364681613943048	Simulations
1.3921253639525202	0.4308211253218286	1.4206379260472886	2.3600522573266924	0.9679268933741724	53.0	116.0	2.4382546589852474	0.011084903564094428	Simulations
0.9781002386026814	0.5379868685447178	1.5614558982135038	2.026524514692078	1.0484242760893967	59.0	95.0	1.9329240660574718	0.010008262769670342	Simulations
1.1321787684696505	0.6740520407226822	1.7608598683081025	2.216090264744864	1.0839114962752137	65.0	91.0	2.0445306395958562	0.011338128389422128	Simulations
1.1236612379840054	0.7687778113876178	2.0396501776947735	2.3931503947110113	1.269489156727006	54.0	73.0	1.8851286614223837	0.012529630025417935	Simulations
0.5758116288661467	0.5696740563184209	1.3907356927996701	1.4413856487464771	0.8655740198803304	63.0	67.0	1.6652367280452285	0.010981004233776934	Simulations
1.4375406017954437	0.6987433124160767	2.0038705366027068	2.686807659282932	1.2492670574874885	75.0	123.0	2.150707203219309	0.008982204308621167	Simulations
1.8155669072689367	0.6001936784288328	1.7469573278339654	2.8922406679848978	1.076673760715961	67.0	135.0	2.686273942500122	0.010560047676384295	Simulations
0.8054992536844003	0.6877120729947204	1.9527919731089785	2.059775854856107	1.2542766011717066	47.0	52.0	1.6422022486363277	0.013762150307556066	Simulations
0.655080065967311	0.5499649350490918	1.7915914408155913	1.9082812840729892	1.2532012181056782	36.0	42.0	1.5227253664479525	0.014444184898361167	Simulations
1.1360046420725913	0.5582259161264247	2.0968941759956694	2.5658305581420233	1.429825916069432	45.0	68.0	1.7945055613451528	0.012405682267815677	Simulations
1.1576090615489372	0.5774682584072346	1.7467238815670107	2.368464548827947	1.2108554872790098	47.0	93.0	1.9560257798808625	0.010407799835898958	Simulations
1.3081646981739399	0.7715313876647509	2.1236666044026564	2.5215403680086483	1.2133756698347085	59.0	76.0	2.078120099731474	0.013885250441943634	Simulations
1.4517316516812429	0.8383107555881351	1.7960099741042252	2.4505686157654845	0.9988369640842415	79.0	121.0	2.453422033707199	0.010700788639012072	Simulations
1.4574068167231198	0.5895759874404076	1.9869229984358665	2.8095681356587154	1.3521613189355957	50.0	93.0	2.0778350159213046	0.011344958129474869	Simulations
0.9277841040615891	0.7928305700474902	2.022032269600641	2.158341091518621	1.2305569874570321	80.0	89.0	1.7539546022804449	0.00910799333592746	Simulations
1.2275227179801398	0.6228661931232746	1.828360810857717	2.4098762136599525	1.1823534956798127	60.0	95.0	2.0382028069146583	0.01081365906170888	Simulations
0.5042104978929052	0.7717677915628647	1.9759733628149194	1.5954931872532745	1.0912826893603693	70.0	49.0	1.462034725565414	0.01118321587582771	Simulations
1.4611472003631745	0.6476638568703275	1.9513277975677803	2.6783752869579383	1.2172280865947638	66.0	100.0	2.200388995665375	0.011377585930719327	Simulations
1.2176190532615259	0.7476468606676745	2.1238628672996454	2.6458057278324425	1.4281866745709166	37.0	61.0	1.8525629561887254	0.014582337227732453	Simulations
0.7726978176382318	0.786030771538883	1.9719049406483102	1.8725672509875566	1.0998694333493249	77.0	75.0	1.7025359503675002	0.010235803495787761	Simulations
1.1425530355826778	0.7678931711512162	2.0255295957676496	2.4111110347590254	1.2685579991763476	58.0	80.0	1.9006707114097403	0.011581357608761507	Simulations
1.125747549711725	0.639372517751942	1.9433740814116163	2.4178280059849104	1.2920804562731854	54.0	82.0	1.871267376769073	0.011024581870133944	Simulations
1.2918135941803441	0.7391058036481053	1.7065399811714075	2.3882366218079176	1.0964230276275735	58.0	106.0	2.1782072809758057	0.010595672163046176	Simulations
1.1444641018902213	0.5723736342463466	2.0371292593269823	2.5182904179550185	1.3738263160647972	54.0	87.0	1.8330486092073388	0.010048793610415233	Simulations
1.6412676359855383	0.9321672839736033	2.11567197687051	2.7718755449197197	1.1306079089341814	73.0	102.0	2.451668277761079	0.012683958713871502	Simulations
1.3112421034357156	0.7779205287145226	1.8837964253213366	2.3781579637531447	1.0669158603174291	82.0	111.0	2.229002353611647	0.010418001260769201	Simulations
1.1937725215229595	0.551763221862531	1.4627855908897527	2.120037955597479	0.9262654340745194	73.0	127.0	2.2888017598494543	0.009406240252408942	Simulations
1.052228261077164	0.8414835078332702	1.5489053176512084	1.874040630047416	0.8218123689702519	84.0	108.0	2.280375303179761	0.011011771130147107	Simulations
0.9047735086182105	0.5800132319599673	1.7737314631248693	2.1103541667334773	1.2055806581152668	51.0	76.0	1.7504877442482194	0.01062838106592027	Simulations
1.345463915114762	0.5703203259690524	1.9382249325259309	2.672085801798144	1.3266218866833819	49.0	90.0	2.014203013398555	0.011224545569452205	Simulations
1.2500245943094688	0.7968491545668668	1.983778902472805	2.4629312887104735	1.2129066944010047	55.0	80.0	2.030602436345522	0.012773847596257186	Simulations
1.1067217452547002	0.6028356241486192	1.7938886057284706	2.335738641400783	1.2290168961460826	41.0	73.0	1.9004935153659221	0.012690056200257194	Simulations
1.2150559507742507	0.7493363289326656	1.7492907866466412	2.2407646767426628	1.0257087259684121	70.0	100.0	2.18460135905256	0.011273700441250464	Simulations
1.0950232415520935	0.8412590864944158	1.8891571669368377	2.180480716909787	1.0854574753576933	75.0	93.0	2.0088126586361645	0.010820892741587195	Simulations
1.000602822920051	0.8513866654290627	2.0726051034296438	2.3142171471005235	1.3136143241804725	62.0	77.0	1.7617173507485153	0.010610162044015263	Simulations
1.0256515037480975	0.7995226400748368	1.726231440102761	1.9896417304041962	0.9639902266560987	70.0	86.0	2.063964628879994	0.012156026126027402	Simulations
1.524364494335161	0.8261335973001762	2.2811462976463592	2.948570760594741	1.42420626625958	53.0	85.0	2.070325647659611	0.012351267192399311	Simulations
0.9206145724157366	0.7454639737874549	1.7394871489969825	1.9638662534936864	1.0432516810779497	59.0	72.0	1.882447245581721	0.012675131039286646	Simulations
1.0322069495777197	0.6250390530423064	1.9060914445407096	2.2540026756784486	1.2217957261007288	57.0	76.0	1.8448277625523641	0.011624817489204407	Simulations
1.0275158153819839	0.916632233881304	2.4174178727924125	2.5149626231179814	1.4874468077359975	71.0	76.0	1.6907916370777238	0.009969722127653074	Simulations
1.0838281938973215	0.5602676782280324	1.4977082565278108	1.9892713313294608	0.9054431374321392	76.0	117.0	2.197014090770059	0.009705505321881155	Simulations
1.1294481430853385	0.6559703835362067	1.9896988972135177	2.4938123726678416	1.3643642295825031	41.0	68.0	1.8278201074143894	0.012795942477890883	Simulations
0.9192063181873606	0.5458265870177177	1.5833240544396752	1.9765330078611187	1.057326689673758	55.0	81.0	1.8693683108207408	0.01114260299930641	Simulations
1.4024357924699116	0.7814908686390589	1.6993506895912163	2.384658510687449	0.9822227182175375	67.0	107.0	2.4278185247180444	0.011959444734927082	Simulations
0.9515514254590518	0.4025983951608796	1.5311951642926203	2.1154476086385094	1.1638961831794576	39.0	86.0	1.8175569601574464	0.01002326252635751	Simulations
1.0422188545847542	0.6741010597588457	1.9452175090935329	2.29226972780482	1.250050873220066	56.0	76.0	1.833741151590137	0.011510394795169875	Simulations
1.1155441951747789	0.45011164755404454	1.4646857687634656	2.1599529675450304	1.0444087723702515	39.0	81.0	2.0681107097971685	0.01294214096120961	Simulations
0.8701520113399425	0.5899766057276041	1.4931325270424103	1.801001342760393	0.9308493314204506	79.0	104.0	1.9347936147863096	0.009155573862656514	Simulations
1.0209563550408087	0.8097806112271171	1.5037009787965963	1.8847320219924237	0.8637756669516151	75.0	104.0	2.181969340076349	0.010823373363334908	Simulations
0.7416127341219336	0.6342700768719944	1.732327076559189	1.8024395223302283	1.0608267882082947	59.0	63.0	1.6990893728979977	0.012139075253236554	Simulations
0.9193368200275407	0.7252725615746347	1.9499370605881603	2.2345391219820603	1.3152023019545196	46.0	62.0	1.69900791586307	0.012333751196955478	Simulations
1.2120420628589004	0.7216605854716895	1.7789608730905655	2.191656575739208	0.9796145128803075	102.0	132.0	2.2372642982750417	0.008801028019965618	Simulations
1.4111002185560813	0.6792440718940145	2.2135345930425885	2.818416400507734	1.4073161819516529	54.0	85.0	2.002688831872295	0.011787509171397077	Simulations
0.9448992273168401	0.7345500242436918	1.5891357491783937	1.7842658461997218	0.8393666188828818	93.0	109.0	2.1257288603809528	0.009981262301662925	Simulations
1.5038340436208355	0.5942385698648984	1.5105168457653908	2.4143505345667573	0.9105164909459218	75.0	149.0	2.651627464823317	0.009442134906643137	Simulations
1.2851609576787348	0.6854511379544923	1.9399919502797471	2.513855588927177	1.2286946312484424	58.0	89.0	2.045956354812846	0.011604217631957318	Simulations
1.1939278771599287	0.7363749037367493	1.6944459521166542	2.1364732246169087	0.9425453474569799	67.0	92.0	2.266706032108893	0.012832579357208709	Simulations
1.304925110051449	0.6883598604817374	1.9352316080721255	2.5175842686732275	1.2126591586217785	65.0	104.0	2.0760856426751713	0.010133326528580849	Simulations
1.073214964668035	0.7761115280106812	1.630181555280074	1.9550663101240153	0.8818513454559804	81.0	105.0	2.217002128758	0.010939144337874471	Simulations
1.3753435334623358	1.3095055225337597	2.2888460005302624	2.470673113407785	1.0953295799454492	81.0	89.0	2.2556435602979263	0.013185832687841905	Simulations
1.3004996842818817	0.5402308836568376	1.4249984746594428	2.1981980877998004	0.8976984035179186	59.0	115.0	2.448704463754706	0.01123494490699621	Simulations
1.1109288698372404	0.6212571758142299	1.508004322951459	1.9688594227237939	0.8579305528865536	59.0	85.0	2.2948937021760796	0.014099145065778132	Simulations
0.999586361108806	0.8689965754796405	2.0234059780086726	2.0904724032110584	1.0908860421022524	92.0	96.0	1.9163068574811881	0.009774256226826768	Simulations
0.9832426494484292	0.7014496875972112	1.670591974073159	1.993200537241829	1.0099578877934	60.0	81.0	1.9735481660494387	0.012108539874166668	Simulations
1.0811844391746617	0.7845361544557328	1.7734694342700084	2.097178303552067	1.0159938643774054	70.0	91.0	2.0641643390604574	0.011489646548685489	Simulations
1.3839434502841197	0.8375658156985772	2.0825071971820437	2.5452452943380504	1.1613018440539307	62.0	82.0	2.1917172588420084	0.01380563044270617	Simulations
1.336972610806722	0.6708301173723048	1.7871651656450662	2.4571753033198664	1.1202026925131445	54.0	89.0	2.193509549425613	0.012733044799232568	Simulations
1.4385143281032635	0.7343020308253838	1.8659931952459436	2.5672858390714257	1.1287715109681622	88.0	141.0	2.274407011627562	0.008407733700209363	Simulations
1.2240740505619059	0.6647830870217462	1.8761805490427192	2.395781481556041	1.1717074309941353	53.0	80.0	2.044692572721281	0.012898549310055322	Simulations
0.9813589616919063	0.8129615388310123	1.9504036602481991	2.066307592413501	1.0849486307215948	69.0	75.0	1.9045211302208922	0.012392377258099033	Simulations
0.6574717943937827	0.748751894069267	1.8595503263015747	1.9409113059638963	1.2834395115701136	61.0	54.0	1.5122733003516897	0.01105034979968687	Simulations
0.90848038978179	0.6833153129335352	1.5128953770931828	1.8084432987087335	0.8999629089269435	85.0	112.0	2.0094642576603543	0.008989383182222989	Simulations
0.9096211961639709	0.5210576862549696	1.6569548993271692	2.0473389753650424	1.1377177792010715	51.0	76.0	1.7995139153074722	0.011152727084197978	Simulations
1.011502479009596	0.6506183176669937	1.7266830976073324	2.087535491835906	1.0760330128263103	57.0	79.0	1.9400292248959738	0.012102258044988778	Simulations
1.1952504879041252	0.5482631938184723	1.6382720076783537	2.2901799348142986	1.0949294469101734	46.0	83.0	2.091623292511725	0.012826783631001752	Simulations
1.2201996017926564	0.8763321196803706	2.0620187398379772	2.446556951428621	1.2263573496359645	70.0	91.0	1.9949788307256966	0.010949158655947063	Simulations
1.122604603750461	0.7189103505070447	1.8427619188286224	2.265116035934954	1.1425114321844931	73.0	101.0	1.9825762544922896	0.009776003528732508	Simulations
1.0581507370428604	0.6226239363593282	1.8418374152534904	2.30518643829588	1.2470357012530195	53.0	80.0	1.8485328334863487	0.011079758359774813	Simulations
1.2803702178878014	0.5929442434310408	1.6297729753421708	2.3644899083945226	1.0841196905067212	55.0	100.0	2.1810229341829888	0.011250049404775649	Simulations
1.3665520530208035	0.5854009358464014	1.9841957304671682	2.737322164463334	1.3707701114425304	42.0	84.0	1.996922854980192	0.011878316663555705	Simulations
0.670836714112313	0.4504596923991062	1.5949592292389458	1.8313249538932674	1.1604882397809544	34.0	48.0	1.5780642070435247	0.013711581370712786	Simulations
1.0473286343377128	0.8179708365878904	1.724009448699371	1.9485392550304808	0.901210620692768	79.0	93.0	2.162135254833795	0.011961900809969816	Simulations
1.2204561247741437	0.5035216958592232	1.7454403311798503	2.4241120001599668	1.203655875385823	51.0	91.0	2.013957684859832	0.011099267816340639	Simulations
0.5313892524626573	0.8763953052189857	2.074767176075405	1.659460383560659	1.1280711310980016	71.0	47.0	1.4710600580172923	0.011848003144089363	Simulations
0.6944838078868764	0.4697874622851196	1.1515172662352628	1.4540784808667906	0.7595946729799142	61.0	94.0	1.914282093583403	0.009965994093404365	Simulations
1.1268283935136192	0.6432648155885151	1.4939224436847365	2.0332794570240527	0.9064510635104336	58.0	93.0	2.243121045221929	0.01253233843518406	Simulations
1.2232959974948463	0.5301730713021873	1.7876664890021563	2.4059681836449576	1.1826721861501113	52.0	88.0	2.034349172848121	0.011642810484188824	Simulations
1.2624940549035801	0.5752122792984768	1.5674416033138423	2.2652335301602027	1.0027394752566225	55.0	106.0	2.2590449324641186	0.011091631757163394	Simulations
1.126475732295504	0.6984783256282991	1.7085694499827717	2.159385466993196	1.032909734697692	79.0	119.0	2.0905848734451093	0.008940391722871846	Simulations
1.4424996823896814	0.9181705391649932	1.7791449567818385	2.363134670450095	0.9206349880604138	102.0	141.0	2.5668529885321085	0.0096453948280283	Simulations
1.3350206057444856	0.8927898171407407	2.1724926148277146	2.5970819748382845	1.262061369093799	78.0	102.0	2.0578095791832007	0.010206955761137133	Simulations
1.1190972844406133	0.5707080927296608	1.426293219043624	2.0326147998093096	0.9135175153686963	63.0	111.0	2.225041956627339	0.010394887753105965	Simulations
1.3484407020591878	0.6101041008616275	1.651011120876174	2.3940592215061987	1.045618519447011	55.0	100.0	2.2896105768787725	0.011951022417366645	Simulations
1.4163776304405578	0.6977420935161798	1.7817551330035275	2.4957656390392158	1.079388008598658	52.0	86.0	2.3122043409389037	0.01406126629735207	Simulations
1.1183606421116081	0.5365461622964476	1.657870106209807	2.285479693431455	1.1671190513198468	42.0	80.0	1.9582232770914845	0.012119315884470482	Simulations
0.8922366175882253	0.5665221206842961	1.9527220346407352	2.2411269992922933	1.348890381704068	46.0	62.0	1.6614596928632948	0.011813730541365157	Simulations
1.503573375316805	0.80196731844647	1.9284673106031807	2.602134070434309	1.098560695117504	86.0	128.0	2.36867574272351	0.009719380593237313	Simulations
0.9521344944567238	0.7193869917366758	2.132472180049173	2.355439422091082	1.4033049276343583	51.0	62.0	1.6784943711854545	0.012051091919028874	Simulations
1.1427332869307254	0.7140370299885479	1.7110311287908695	2.1639936108517905	1.0212603239210651	61.0	86.0	2.1189441713972323	0.012597041592942398	Simulations
1.5625840478380821	0.6868842633565155	1.8478431953570262	2.7282376841941494	1.1656536363560672	53.0	95.0	2.3405217459989687	0.01291400178233774	Simulations
0.8521586921459474	0.5536950384218635	1.5633130472036347	1.88949133019346	1.0373326380475125	46.0	68.0	1.8214902924002245	0.012722342739469015	Simulations
1.319713271999241	0.5079019317579812	1.70990064576324	2.589794391768194	1.2700811197689528	33.0	84.0	2.0390779387692315	0.012237106189277964	Simulations
0.7965944872748436	0.7858469796550644	1.9141436040097588	1.8309285689362953	1.0343340816614517	97.0	97.0	1.7701520247648355	0.008493538841526049	Simulations
1.133472527124183	0.6096191355052067	1.8131817299047492	2.3009978525564034	1.1675253254322204	76.0	116.0	1.9708333536187483	0.008437980970519515	Simulations
1.3599754676708957	0.7471227609416937	2.0960768744586336	2.706844904636055	1.3468694369651595	58.0	95.0	2.0097307358427163	0.010600023386938079	Simulations
1.0612633489152439	0.6729247646337164	1.9988469776507283	2.3483403612907403	1.2870770123754964	67.0	90.0	1.8245531065437341	0.00963936826095526	Simulations
1.4292915948757792	0.6930282206506025	1.550510115233348	2.3243707928857558	0.8950791980099766	76.0	128.0	2.596832546274691	0.010755882707066797	Simulations
0.9285333039242618	0.7088597361926265	1.9922744388711213	2.229790341165322	1.3012570372410603	47.0	59.0	1.713566403370197	0.013169527112251963	Simulations
0.9350873976422394	0.7974844383954902	1.852886186231776	2.0030356394646103	1.067948241822371	68.0	77.0	1.8755924313771848	0.011783718992746151	Simulations
1.4508994108342688	0.5560104898155753	2.1404197534955784	3.036301714036225	1.5854023032019564	36.0	80.0	1.9151616645844156	0.011718327244240885	Simulations
1.1405732134958926	0.9105326786656931	2.4835959025378203	2.7025161134008684	1.5619428999049758	72.0	83.0	1.7302272148138589	0.009529656700758405	Simulations
0.9171909503559272	1.156606489320263	2.0390282569820153	1.9116725459701853	0.9944815956142581	86.0	72.0	1.9222804669295153	0.013094706185218246	Simulations
0.6898977506448427	0.9503475812330284	2.0237627121266804	1.8309496979754258	1.1410519473305831	83.0	64.0	1.6046155499395218	0.010659807550708804	Simulations
1.2434451931159471	0.5808976105866905	1.860441605110948	2.491057600488977	1.2476124073730297	59.0	96.0	1.9966598486577598	0.010391547665834031	Simulations
0.9116928774332794	0.7430294848796507	1.7212019424698455	1.8777789026279685	0.9660860251946891	65.0	74.0	1.9436974075363027	0.01295680593788813	Simulations
1.0309158770840505	0.6548294087832376	1.687981973084961	2.096333164187645	1.0654172871035943	57.0	83.0	1.9676169981122251	0.011764450886434998	Simulations
1.2667605454553776	0.5691967349629979	1.2854182946519368	2.043651601918966	0.7768910564635882	57.0	110.0	2.630551072658344	0.012685136914073986	Simulations
1.109204265994072	0.47444385206569684	1.7387820097034858	2.406221144013379	1.297016878019307	41.0	86.0	1.8551964780041672	0.010367116118793573	Simulations
0.6776794048419634	0.6219958529673031	1.8191323220105498	1.8836698537844516	1.2059904489424882	83.0	89.0	1.561927671513658	0.007228400537851489	Simulations
1.7152760613109017	0.5521925287656868	1.6524265732418821	2.7759149092022954	1.0606388478913937	64.0	134.0	2.61721029238271	0.010358431711446953	Simulations
0.5952137779588393	0.8418236669247512	1.8314653363601918	1.6526409255121757	1.0574271475533363	81.0	61.0	1.5628886863137934	0.010560902112580695	Simulations
0.8627688418558026	0.691145196963908	1.7389877258957125	1.9764463118392266	1.113677469983424	57.0	74.0	1.7747026092470417	0.01118347688302491	Simulations
1.307525321052287	0.6714271773483769	1.7443190322099975	2.425711618500157	1.11818629744787	56.0	104.0	2.1693269037874647	0.010742764176663642	Simulations
1.1371579728560623	0.7612060658072153	1.6882213593481032	2.1563287729238874	1.019170800067825	55.0	84.0	2.115767811224954	0.01287120609254937	Simulations
1.0025219291914307	0.6206039243112702	1.5513511348317606	2.018604254885002	1.0160823256935712	52.0	85.0	1.9866542344461269	0.01165106825645857	Simulations
1.3962644991287112	0.7109373894338458	1.4554452544536354	2.259860148280142	0.8635956491514308	63.0	122.0	2.6168035358916883	0.011375455851975297	Simulations
0.4923076465768127	0.6110898414986999	1.421602136501505	1.3889545187187564	0.8966468721419437	58.0	48.0	1.5490541057716174	0.013153906996699901	Simulations
0.59971992034344	0.5402450966594847	1.6102315857630016	1.6606894678653157	1.0609695475218757	52.0	55.0	1.5652564880341908	0.011752710568085174	Simulations
0.6403803260167151	0.684036282642585	2.0279278985205584	1.941031424438008	1.300651098421293	58.0	54.0	1.4923536579440846	0.010696101221406473	Simulations
1.1119800488068803	0.7511367993753424	1.8239335735303366	2.217540245938169	1.1055601971312887	67.0	92.0	2.005806876633448	0.010915029422602517	Simulations
1.0093182177666564	0.7226828998981849	1.9089344453670385	2.167575521380731	1.1582573036140744	61.0	76.0	1.8714110540182325	0.01189640105601285	Simulations
0.5168762038970676	0.6725605806023791	1.9929612083127854	1.7945321882791705	1.277655984382103	62.0	49.0	1.4045503720996055	0.010002211540678735	Simulations
0.9823947128524826	0.7388587242022727	1.5941597704570636	1.855577911053058	0.8731831982005753	77.0	95.0	2.1250728539863872	0.01144749791673135	Simulations
0.9482065386435565	0.6374428926710471	1.6643077223626035	2.040878517527014	1.0926719788834574	58.0	84.0	1.8677870000953787	0.01073011835042405	Simulations
1.1653469521447573	0.9054779417849534	2.195228984380258	2.470862779456832	1.3055158273120746	57.0	70.0	1.8926333390718741	0.013148499199778195	Simulations
0.7093629552153764	0.8989808583826986	2.144168931369883	1.915908454850731	1.2065454996353546	60.0	49.0	1.5879288890719512	0.013615230752830857	Simulations
1.0768640910745446	0.5553526253978758	1.9785880018305229	2.5182548277308654	1.4413907366563208	43.0	79.0	1.7471007435309387	0.010189402546302642	Simulations
1.0950773406755119	0.8157974515733235	1.828265161406961	2.1819223037343867	1.0868449630588748	54.0	75.0	2.007574564815084	0.013406047639248969	Simulations
0.6025932912224126	0.7494442646095187	1.6301574209055651	1.500099551258636	0.8975062600362234	118.0	99.0	1.6714084547979553	0.007485498372187313	Simulations
1.249539828536855	0.7198221648699005	1.6836407922842949	2.1963110652895543	0.9467712367526994	63.0	93.0	2.319790652726853	0.013053705554867807	Simulations
0.8518733018871885	0.6467065583705986	2.1134067475474745	2.3185675543061057	1.4666942524189173	50.0	61.0	1.5808117816526879	0.010830583677966075	Simulations
0.7185644270504614	0.7445514111005254	1.6916322015178975	1.73002384610888	1.0114594190584185	75.0	72.0	1.710423387741431	0.010754909516971695	Simulations
1.1974426607136484	0.5712526974271244	1.7132787363501571	2.417967484114103	1.2205248234004547	49.0	104.0	1.981088330000124	0.009483588524359631	Simulations
0.9398787350104811	0.5176807862539956	1.6827455052135836	2.0764402500118377	1.1365615150013566	57.0	85.0	1.826949287482569	0.010228665742889104	Simulations
0.9807225888239153	0.7284598135060127	2.156051550600415	2.3906307628127297	1.4099081739888144	51.0	63.0	1.695593235727773	0.012091906605364314	Simulations
0.7650925179773052	0.772019615656953	1.725617292131927	1.8088476102813464	1.0437550923040413	63.0	68.0	1.7330191954210241	0.01166599462196232	Simulations
0.9902450887259449	0.6103722342474871	1.6522734025232424	2.1407510984807057	1.1505060097547608	35.0	65.0	1.860703968801539	0.013782285325343027	Simulations
1.1098072542793438	0.6952369916563834	1.7725126676317091	2.249033329420577	1.139226075141233	57.0	87.0	1.974176485682842	0.01127874676246451	Simulations
1.433501926160386	0.684637281500313	1.7633694509179034	2.512173595747795	1.0786716695874088	62.0	102.0	2.328951122549366	0.01195765060959228	Simulations
1.4697613391133253	0.7203311342594094	1.6625854491323575	2.41614347836107	0.9463821392477445	73.0	120.0	2.553031569553502	0.011268428146036527	Simulations
1.103162918822252	1.0167186489168312	2.5020573067834757	2.5457960937936814	1.4426331749714294	62.0	63.0	1.7646870583328291	0.01300654547821964	Simulations
0.9385693836949318	0.6002899531137378	1.579232192617307	1.9523768848885548	1.013807501193623	62.0	93.0	1.9257865843267994	0.010166105726583517	Simulations
1.1785764284025702	0.5742647881889684	1.7914461702416409	2.3758110058329143	1.1972345774303441	53.0	84.0	1.984415627998466	0.01177040743022365	Simulations
1.3077712095311178	0.7571241465802898	1.9055928577164443	2.4309787378191667	1.123207528288049	72.0	105.0	2.164318415426198	0.010608692996898657	Simulations
1.2645414266272232	0.7141844585992492	2.002387325601247	2.5004683927223956	1.2359269660951724	69.0	100.0	2.023152226075669	0.010166048752803209	Simulations
1.2284682404207685	0.7744950834036748	2.0134870389988455	2.5535026322345673	1.3250343918137988	39.0	59.0	1.9271217773745148	0.01604148712410821	Simulations
1.1380683520103307	0.6187794267743085	1.625982769149699	2.1557226193601875	1.0176542673498568	54.0	90.0	2.118325140987275	0.012032489389833962	Simulations
0.7397110441756771	0.7916862216331659	1.6707527093212093	1.8274345493067516	1.0877235051310745	79.0	74.0	1.6800542975179518	0.01011497108221365	Simulations
1.0430721723621512	1.0068281440847935	1.8703535330072052	1.9886204427164473	0.945548270354296	95.0	103.0	2.1031400564788862	0.010413057554192105	Simulations
0.8157554018521836	0.9919256993875313	1.8429783765363756	1.59673254695777	0.7809771451055864	95.0	82.0	2.0445317215293097	0.012582566425472359	Simulations
1.0089634067621667	0.759297231026131	1.7822621216236667	2.0976960320207274	1.0887326252585607	67.0	89.0	1.926732039946493	0.010630965650844587	Simulations
1.5572663346226059	0.7675019886336854	2.3610295755919037	2.9774633769818313	1.4201970423592254	59.0	85.0	2.0965142780720636	0.012564619476803113	Simulations
1.3161999159674114	0.6269588732477307	1.8779626413017707	2.628832642420374	1.3126327264529625	51.0	102.0	2.002717583862234	0.009823127370105251	Simulations
0.8621869174674179	0.5726700631518353	1.7804314712782454	2.072310138748874	1.210123221281456	50.0	68.0	1.7124786156523861	0.011413029010651912	Simulations
1.1491952945674382	0.7952176727712913	1.9899936321093334	2.2503478262294117	1.1011525316619735	70.0	84.0	2.043629525904966	0.012275401008785412	Simulations
0.9107890924995172	0.7564280496164386	1.9977947599933708	2.049122564863134	1.138333472363617	86.0	89.0	1.800107450594745	0.009529022756631573	Simulations
1.0353173975008971	0.8486238378190044	1.8377624009738964	1.9534977527127277	0.9181803552118305	88.0	95.0	2.127575199822308	0.011465369740290884	Simulations
1.1923282124298893	0.6638643771023844	2.055222702441331	2.5678376166919636	1.3755094042620744	50.0	76.0	1.8668266525371688	0.011849841707963993	Simulations
1.381855271248011	0.5899107591981159	1.5475366854369041	2.337916490715874	0.956061219467863	50.0	92.0	2.4453627478135154	0.014022266217714657	Simulations
1.3007553675042924	0.8094313583569333	1.7393458736846246	2.3151187966037803	1.0143634290994878	63.0	99.0	2.282336616432487	0.012025369565662719	Simulations
0.7672101690936377	1.0372339854468853	2.1055408656827614	1.9626022657089262	1.1953920966152884	64.0	50.0	1.6418062920659815	0.014305678425856104	Simulations
1.227352293300788	0.6405786554160107	1.5024751353083339	2.1344255207129312	0.9070732274121431	65.0	109.0	2.353090639443072	0.011326210029902828	Simulations
1.147119586870106	0.5048232950218541	1.806142130253518	2.449667278214141	1.3025476913440348	55.0	111.0	1.8806737707134928	0.008209455989558434	Simulations
1.3968557375956687	0.7430177755212461	1.9762055791384894	2.6393584372914165	1.2425026996957478	68.0	109.0	2.124227527181806	0.009971911030090087	Simulations
0.8954077895837582	0.679647999712871	1.786289505011333	2.028445873363894	1.133038083780136	65.0	83.0	1.7902715737465984	0.010122631957901798	Simulations
0.8004450627272048	0.8153241196474335	2.0195288701949807	1.7636006983396968	0.963155635612492	74.0	72.0	1.831065129176329	0.012120598712279797	Simulations
1.1616090303412199	0.6494600495534415	1.7798593312408086	2.317329298216038	1.1557202678748182	56.0	86.0	2.00509531815794	0.011670590943043058	Simulations
1.4023542916174756	0.7327816108937995	1.9689987201551906	2.7026819425009627	1.3003276508834871	63.0	111.0	2.0784622557742796	0.009509158101879241	Simulations
0.6269518401939964	0.8266911663359227	2.2001166922058677	1.9103475520269526	1.2833957118329562	51.0	40.0	1.4885101566208123	0.014346726640448226	Simulations
1.50781873508863	0.6584207547097007	2.198975325509538	2.9760491414379535	1.4682304063493234	49.0	84.0	2.0269632944312472	0.012134761473593821	Simulations
1.0502604359529233	0.7123336982364394	2.1940607309253704	2.4798477030149315	1.4295872670620082	42.0	54.0	1.7346598981056596	0.014715793185511358	Simulations
0.5751901797538038	0.7561403471488338	1.8136953303587457	1.4962128023239436	0.9210226225701398	106.0	85.0	1.6245125425352955	0.00823537508787357	Simulations
0.98653841066374	0.8146281420799626	1.4430704393156109	1.722943866657722	0.7364054559939819	93.0	118.0	2.339667438139951	0.010392402362411788	Simulations
1.4348046174398152	0.5221559899932682	1.7999239581286801	2.678045089038413	1.2432404715985979	51.0	107.0	2.154084547774493	0.010346494175180472	Simulations
1.4655507780458665	0.579014387363354	2.1612382335492883	3.003356678779962	1.5378059007340956	49.0	94.0	1.9530141465488349	0.010273429780249596	Simulations
0.35045135448819975	0.6876920704452569	1.7170646176285111	1.3688013181711862	1.0183499636829865	83.0	47.0	1.3441364628921375	0.009078289671549368	Simulations
0.9087319246324803	0.5588013828278378	1.675105060054743	2.046489335565824	1.1377574109333435	67.0	101.0	1.7987044653807307	0.008385724408608353	Simulations
0.9002388368727585	0.7787252335767052	1.8276834786429628	1.960185901916575	1.0599470650438165	75.0	84.0	1.8493243356785407	0.01055950318697972	Simulations
0.8292049793417784	0.7600823462426107	1.8874453092389487	2.012443285336891	1.1832383059951128	63.0	71.0	1.7007928792876685	0.010791654392402964	Simulations
1.6227376657197845	0.5709987645660619	2.178991949320295	3.188491803386116	1.5657541376663313	42.0	89.0	2.0363936627613732	0.01152827506817372	Simulations
1.1256442047868205	0.6682805720307265	1.7261123575797355	2.20111314290606	1.0754689381192397	64.0	93.0	2.046654315051931	0.011110402668780257	Simulations
0.9150430775077578	0.7875737235592764	1.8628620178879962	2.052569510038707	1.137526432530949	54.0	65.0	1.8044147822322028	0.013100477079214148	Simulations
1.1106727775645107	0.7115724333655866	2.0125957088401565	2.348816854731648	1.2381440771671373	73.0	97.0	1.8970464730612937	0.009523247646698848	Simulations
1.318492032880568	0.7423979650675223	2.0113569039980894	2.5255212092013006	1.2070291763207326	68.0	99.0	2.0923447906202206	0.010758794021701054	Simulations
0.9506922706267198	0.7708377961078821	1.9402786791315285	2.215267816758742	1.264575546132022	47.0	61.0	1.751787644110799	0.013259473747442168	Simulations
1.4052058984550344	0.7576331391458468	2.0699581796544906	2.6999306201846087	1.2947247217295743	44.0	70.0	2.085331788967366	0.015146813478369076	Simulations
0.8550778358347242	0.6368491744101503	1.7085844543397357	1.9573356306718748	1.1022577948371506	57.0	74.0	1.7757512261104533	0.011194992992771137	Simulations
0.9418187348833185	0.5545302664000932	1.2937053073252014	1.7532388387878723	0.8114201039045539	53.0	90.0	2.160704215179395	0.01235001767966557	Simulations
0.6640741240900401	0.6943685237058193	1.9446262389139046	1.952163537208341	1.288089413118301	57.0	54.0	1.5155497105456375	0.011108169884926652	Simulations
1.3011118903103776	0.6823697733424672	2.1481816384568266	2.731462134017441	1.4303502437070637	51.0	79.0	1.9096456591906212	0.011813986917125664	Simulations
1.1123098829183455	0.4273530006403461	1.5106922682789155	2.1635270024154134	1.0512171194970679	44.0	80.0	2.0581162181324695	0.013016555636677366	Simulations
1.1323032682717207	0.39849094552244857	1.4511940890590338	2.1782646739580387	1.045961405686318	40.0	87.0	2.0825478474788928	0.012164938420032344	Simulations
1.3235497186940657	0.6887026169559971	2.03471005820165	2.661319325505489	1.3377696068114233	59.0	97.0	1.9893704506030372	0.01023002013024826	Simulations
0.843646369113652	0.8760707792198241	2.2204780511044455	2.0117188084220707	1.1680724393084188	71.0	68.0	1.7222551793218837	0.01153380759767032	Simulations
1.4200699556617769	0.5642277932529958	1.5961603207862123	2.4543677943180793	1.0342978386563024	66.0	130.0	2.3729797187883968	0.009589998232790905	Simulations
1.270285463933204	0.9472608632703747	2.123462921478812	2.372722513918008	1.1024370499848042	74.0	86.0	2.1522521525838716	0.01285868733034044	Simulations
1.2574377316751062	0.8360470817061829	1.6102593501364144	2.0786742638645035	0.8212365321893972	78.0	109.0	2.531151723514792	0.012291687970284864	Simulations
1.6567040424972121	0.5932065708930583	1.8251202025143665	2.8795637477880467	1.2228597052908345	47.0	99.0	2.3547785042955485	0.012480720839545694	Simulations
0.8335727855299249	0.4735343337775937	1.492085212021393	1.8968566273566587	1.0632838418267339	43.0	74.0	1.7839607381767761	0.011284917087017477	Simulations
0.8325684519963734	0.5963748667405595	1.6449445754004104	1.9172519897385987	1.0846835377422253	54.0	72.0	1.7675680721857079	0.01141341356740087	Simulations
0.8252356092326941	0.47256394358565246	1.4792745775231209	1.8074036162220317	0.9821680069893376	44.0	64.0	1.840218377467118	0.013748077813807871	Simulations
1.4232020457034782	0.6511700998371794	1.9771903130047555	2.6407344401569093	1.217532394453431	68.0	102.0	2.1689233503658647	0.010950775187707734	Simulations
0.6447868523689317	0.6959145345594133	1.6160115222988656	1.7343929452793134	1.0896060929103817	69.0	64.0	1.5917614232925956	0.010478501840234928	Simulations
1.0055851052010878	0.5827954196296712	1.5508925703290475	1.9942131309149065	0.9886280257138186	61.0	92.0	2.0171521331038798	0.011003477127711204	Simulations
0.962142509277556	0.8971151984665893	2.0638422059973327	2.113585684250712	1.1514431749731562	71.0	73.0	1.8355970404705266	0.01200341624397727	Simulations
0.9904242978469955	0.6319925270361999	1.6685122662868284	2.0200883731725883	1.0296640753255928	77.0	106.0	1.961890699676796	0.009172119516610172	Simulations
1.179321562265394	0.5647566083292904	1.192216147323383	1.827099191677655	0.647777629412261	76.0	123.0	2.820565435912647	0.012162474855604786	Simulations
1.4003437595542492	0.779203471357482	1.9457879996389045	2.5758563663336695	1.1755126067794204	53.0	84.0	2.191262221670939	0.013473358780677238	Simulations
1.0799036741398298	0.7437757420529443	1.9353000885171618	2.2057651843466237	1.125861510206794	78.0	95.0	1.9591798496970354	0.010213156219690144	Simulations
0.9489675547098493	0.659863301922321	2.1595795219539373	2.4245077179625842	1.475540163252735	53.0	68.0	1.6431323106908255	0.010536009643453048	Simulations
0.7237581126661319	0.6045388093719511	1.3049263903354438	1.4838452318414357	0.7600871191753038	61.0	76.0	1.9522041545071978	0.012698735956079774	Simulations
1.1629428687415106	0.7360615504165879	2.0200558816172167	2.4021539117711113	1.2392110430296006	62.0	83.0	1.9384542490021466	0.011504899822888643	Simulations
1.1872513193599732	0.6835161063931571	1.7005231779822014	2.206573256187044	1.019321936827071	53.0	82.0	2.1647461674921176	0.01358777888047981	Simulations
1.3009617504946627	0.668779724022998	1.7591177195934817	2.405889150976878	1.1049274004822152	67.0	108.0	2.177418308141235	0.01039461660326239	Simulations
1.0079721998481244	0.723391553357116	1.6738301272655218	1.9956166298967764	0.987644430048652	76.0	100.0	2.020582073042695	0.010147709528412976	Simulations
1.1043931925813395	0.6837656723597951	1.7169845935515244	2.114280368754666	1.0098871761733264	79.0	105.0	2.093580766879441	0.010152119770835076	Simulations
1.3202376569526566	0.824545783881288	2.420951466197583	2.867846819535812	1.5476091625831556	62.0	84.0	1.8530820887290516	0.010594366571254081	Simulations
0.9002195485185869	0.6873774109707331	2.0029434721007493	2.130902578793895	1.230683030275308	69.0	77.0	1.731479614468402	0.010285784442875714	Simulations
1.5809503472622815	0.6206536840607635	1.8793692970455205	2.808752699110361	1.2278023518480794	56.0	107.0	2.2876260946093208	0.011157488479949872	Simulations
1.5720473122927032	0.7005061312176455	1.9469462868960987	2.7567030828889725	1.1846557705962693	66.0	110.0	2.3270076855333675	0.011077054323796284	Simulations
1.3177441223235076	0.792759047100543	2.1246179445311864	2.7116760007427603	1.3939318784192527	60.0	95.0	1.9453432715936279	0.01010552371487114	Simulations
1.174247566373976	0.7566144516790287	1.7606787434812514	2.1601132083589833	0.9858656419850073	71.0	94.0	2.1910827564795423	0.012038765696567429	Simulations
1.1496815081928289	0.6048083335040613	1.4825059796763493	2.0781690070833965	0.9284874988905677	65.0	108.0	2.238230465748394	0.010762579584719961	Simulations
0.8501376275725938	0.6669913548385531	1.9475887889041055	2.1569921453818988	1.306854517809305	47.0	59.0	1.650522009900298	0.012252921647331437	Simulations
0.7446469685254693	0.5645379215657891	1.2581827075875227	1.5285699071093746	0.7839229385839053	76.0	106.0	1.9498981747754633	0.009088667804397335	Simulations
1.5504134419989162	0.5731937474525415	1.850752910188749	2.7773929044695596	1.2269794624706434	57.0	110.0	2.263601787496106	0.010714728925320764	Simulations
1.1878799961645137	0.6738810674928791	1.5169155289847458	1.960400219763443	0.7725202235989291	76.0	106.0	2.537668477636163	0.012674562330559316	Simulations
0.5819925674912843	0.6177677482802892	1.8718578418124214	1.9490650103382259	1.3670724428469416	42.0	39.0	1.4257218193055512	0.013120320943686148	Simulations
1.4582198872370398	0.5471479453192722	2.402635175926079	3.130582268362271	1.6723623811252313	44.0	72.0	1.8719520982383566	0.012563104416359038	Simulations
1.008810727749922	0.6829048970468172	1.8643299672827915	2.1594852036914784	1.1506744759415564	54.0	72.0	1.8767125271675535	0.012613995508304422	Simulations
1.0279638045216757	0.49513378596856317	1.4178330519611377	1.9978933902259748	0.9699295857042992	46.0	87.0	2.0598334349964547	0.01198307679299926	Simulations
1.4806932729991182	0.682965572619872	2.029452538926263	2.7481412091410506	1.2674479361419324	59.0	91.0	2.1682478078794283	0.012269556603928639	Simulations
0.789769035992119	0.6281335751980415	1.4019897641235102	1.5851964952234292	0.7954274592313102	79.0	95.0	1.9928863114121564	0.010472204324306237	Simulations
1.470492872391648	0.5066100462744121	1.5629983309704762	2.428700480969903	0.958207608578255	68.0	121.0	2.5346286746496394	0.011089044682686995	Simulations
1.2785409935971308	0.6463849931243215	1.7191886524157818	2.364528766677208	1.085987773080077	63.0	103.0	2.177306987509569	0.010898493528183725	Simulations
1.3743780088267101	0.7329770164623925	1.7114305624812332	2.392164507531041	1.0177864987043308	72.0	119.0	2.350359835364617	0.010360349978230295	Simulations
1.3009015921488953	0.6670678241889887	1.865800828281712	2.4706891412493137	1.1697875491004184	56.0	90.0	2.112083637023924	0.011985188505940996	Simulations
1.1087396020724012	0.8200785106641122	2.049744314966024	2.2809313977252637	1.1721917956528625	76.0	89.0	1.9458687615663433	0.010791173161134161	Simulations
1.5505397590138306	0.521430862807797	1.675112618490786	2.6782293725150557	1.127689613501225	60.0	128.0	2.3749703291136557	0.0097492928885544	Simulations
0.7899640378484818	0.6612158076978625	1.7978149817447755	1.9855749056446579	1.195610867796176	52.0	63.0	1.6607200211424913	0.011616013833661724	Simulations
1.006137291019368	0.6814514113417609	1.8408483065853058	2.198653477129086	1.1925161861097182	48.0	69.0	1.8437095468713391	0.012791469497165569	Simulations
0.8912192468996606	0.43212740137534555	1.244161936201145	1.693820229352422	0.8026009824527615	52.0	82.0	2.110413849950794	0.013140560215431729	Simulations
0.9663219486215076	0.469717359214588	1.7008007076277287	2.196300350053325	1.2299784014318174	38.0	66.0	1.785641396220139	0.012673369370010058	Simulations
1.0703742145545259	0.8361997119496307	1.9331212022593554	2.2567648833602902	1.1863906688057644	50.0	68.0	1.9022105809648502	0.013642308325342668	Simulations
1.0457631737003905	0.6696406895186116	1.8959166593493024	2.324403799555603	1.2786406258552123	54.0	84.0	1.8178710675651628	0.010264879524651873	Simulations
0.9370775883149709	0.670497678581286	1.9925828341031595	2.2148595061872913	1.2777819178723204	69.0	85.0	1.7333626929666774	0.009336159518292983	Simulations
1.2027403834851986	0.8495293757214883	2.083384014736668	2.404981965702589	1.2022415822173902	60.0	76.0	2.00041489270974	0.013161832247226998	Simulations
0.7753989718763796	0.7392596533198595	1.5307577043785823	1.618709028687264	0.8433100568108844	74.0	80.0	1.9194707991609614	0.011758857658561666	Simulations
0.8208858609819554	0.7992570649103738	1.9660602372763583	2.083114949327753	1.2622290883457976	48.0	48.0	1.6503461761111524	0.015057680739301636	Simulations
1.0261932113493883	0.6610606760109867	2.0698702895235703	2.365046882736351	1.3388536713869628	49.0	64.0	1.766471522079273	0.012826101425188249	Simulations
0.9441969078996937	0.6602834943261022	2.010551079485364	2.2646250350297894	1.3204281271300957	44.0	56.0	1.7150687633047266	0.013897614650277848	Simulations
1.4397135538298154	0.6337641820202602	1.7964009602022208	2.5953356997172636	1.1556221458874483	64.0	115.0	2.2458341672954028	0.010150012198874911	Simulations
0.7586206454174672	0.7468052632411595	1.8089354729583695	1.7429731266771538	0.9843524812596866	84.0	84.0	1.7706798731757674	0.009813135788783433	Simulations
0.6288283718356391	0.6901081868367556	1.5287322144125834	1.5812868785952372	0.9524585067595981	87.0	80.0	1.6602160276514348	0.00914213721953034	Simulations
0.7920760337095505	0.8051249236547429	1.9103834933439274	1.8178712346041912	1.0257952008946407	82.0	80.0	1.772158061393489	0.010318841071650344	Simulations
0.7501005840363656	0.865347792895369	1.5485784267303737	1.6991436320774553	0.9490430480410897	80.0	71.0	1.7903757217174086	0.011834681380000232	Simulations
1.4312715798463187	0.643543829477847	1.9852470069008858	2.718866832019398	1.2875952521730794	50.0	82.0	2.111585008899929	0.013150321083059082	Simulations
1.4636156011836405	0.521283827788676	1.3360125158117306	2.399979994186986	0.9363643930033456	50.0	143.0	2.5630833595553124	0.009495667135564928	Simulations
1.5218527064939313	0.553214991894992	1.809916837853262	2.745641464264897	1.2237887577709659	53.0	109.0	2.243558332130674	0.01069530912224556	Simulations
1.2456815117677416	0.7413220614279084	2.2906321354090857	2.783085025332741	1.5374035135649995	44.0	67.0	1.8102502048269682	0.012778942000861562	Simulations
1.2740725879945731	0.8631616355740412	2.1672713769288596	2.580457582130872	1.3063849941362988	69.0	94.0	1.9752657859002056	0.010447306288437564	Simulations
1.0239536800978364	0.6240535058206903	1.4598654503639914	1.8891930409231272	0.8652393608252908	84.0	122.0	2.1834340027263197	0.009234417412704442	Simulations
1.086513502568626	0.7380629709981041	1.7174923417432066	2.103559682545746	1.0170461799771198	54.0	74.0	2.0683030170695584	0.014168210316331836	Simulations
0.6524761478772834	0.5777697192438445	1.5006195871743375	1.625645371555215	0.9731692236779317	51.0	60.0	1.670465251060199	0.01233749953517415	Simulations
1.5687392832869256	0.7151531263518534	1.9977633136793487	2.9011149127271905	1.3323756294402649	43.0	87.0	2.1774001630050512	0.012903523800625585	Simulations
0.9275606915071042	0.8300791419580578	1.6816973640901447	1.83613743038498	0.9085767388778758	111.0	125.0	2.020894165365354	0.008119950155727864	Simulations
0.797276455205199	0.54022401186536	1.5993978369124193	1.8084054389829605	1.0111289837777615	80.0	101.0	1.7885012377218477	0.008304466502397728	Simulations
0.7841506810501171	0.7627159385251658	1.7124009691725752	1.7522509121168552	0.9681002310667381	72.0	74.0	1.8099891477002032	0.01156731144932294	Simulations
1.218577738815895	0.9993983040549479	1.8000476323583834	2.026834840067716	0.808257101251821	103.0	118.0	2.5076610362328684	0.01124018940995521	Simulations
1.022250760580065	0.9031784986782032	1.9835881682917325	2.2060992602713103	1.1838484996912453	68.0	81.0	1.8634979567458794	0.011086583175404762	Simulations
0.5863311378976566	0.7836219737121755	2.247633042236113	1.7286131439640877	1.1422820060664312	59.0	46.0	1.513298060184586	0.012993394993679012	Simulations
1.1936344813269593	0.8136006496459685	1.9992473418119365	2.4011552570238726	1.2075207756969133	66.0	91.0	1.9885001611157045	0.01089758987951281	Simulations
1.1654245031627042	0.5650798765332914	1.8053461810417737	2.374326047534248	1.2089015443715438	48.0	83.0	1.9640359122616213	0.01173278686112549	Simulations
0.940076168582475	0.9616752374657265	1.7720780808354724	2.009416468557504	1.0693402999750292	61.0	59.0	1.879117871648929	0.015424670605064179	Simulations
1.119531907267535	0.6005160614014129	1.6608109729298541	2.175914642811003	1.0563827355434683	60.0	94.0	2.059778685886587	0.011090312069485275	Simulations
0.6445621406888427	0.8385303443909542	1.947437174533773	1.713742960436143	1.0691808197473003	82.0	66.0	1.6028560639922294	0.010312801177492621	Simulations
1.3165947147526282	0.4758471375048754	1.4730063913128597	2.399170396166198	1.0825756814135696	39.0	109.0	2.216168751392502	0.010532731563117324	Simulations
1.101027567320841	0.6672851247002691	1.866354183669845	2.2986491656527965	1.1976215983319556	48.0	71.0	1.9193451160653328	0.01324808654670802	Simulations
0.8669322357883527	0.6181370330115425	1.9625123530474613	2.195032076167458	1.3280998403791053	39.0	50.0	1.6527613432593196	0.014497568324982611	Simulations
1.4202181063426178	0.6788864855987786	2.238477703950188	2.8696783752223762	1.4494602688797584	68.0	104.0	1.979825481825907	0.009474742931249312	Simulations
1.0697590970935007	0.7904923570265903	2.126498572110327	2.3418796846522136	1.272120587558713	71.0	82.0	1.8409258584097299	0.010736969812759277	Simulations
0.8240257241442819	0.5538618593509668	1.4718465530855493	1.7494138503208774	0.9253881261765955	66.0	89.0	1.8904649852693591	0.010322934026151583	Simulations
0.6531597130702487	1.031136765101596	2.262869017755483	1.841704735726034	1.1885450226557854	88.0	61.0	1.5495456214277634	0.010358118542667098	Simulations
1.121953707724483	0.5498817576443642	1.4513161276231312	2.063969934730896	0.9420162270064131	56.0	103.0	2.191013143467692	0.010986389697135807	Simulations
0.6146280355573082	0.6146280355573079	1.7538330742615935	1.7676039573838884	1.1529759218265803	54.0	53.0	1.533079680088718	0.01163080530932592	Simulations
1.17615264388647	0.6595786074805567	1.787000005780074	2.2961913920223185	1.1200387481358485	62.0	94.0	2.0500999593487417	0.01101802398696889	Simulations
1.1170008097650839	0.5538618856800774	1.4563984667293874	2.1133543888693116	0.9963535791042277	50.0	106.0	2.1210887712867192	0.010234009447648988	Simulations
1.165824158929531	0.40768700131339597	1.3718092525337875	2.1521649721045124	0.9863408131749812	42.0	95.0	2.1819688928584453	0.011848742464116359	Simulations
0.6114731002630733	0.6264848406908625	1.6018070537713356	1.663974181526691	1.0525010812636177	53.0	51.0	1.5809714699095108	0.012957084964050734	Simulations
0.9496237121022212	0.7049152013707113	1.6707865616161508	1.8924829051751624	0.9428591930729412	70.0	84.0	2.007174474278851	0.011966262248525303	Simulations
0.7773789228824978	0.4533400865431063	1.367862044771637	1.73740320967699	0.9600242867944923	51.0	94.0	1.8097492256973573	0.009104146798050362	Simulations
0.8942325797072037	0.5338914180650645	1.9598772077802937	2.26668094658799	1.372448366880786	49.0	67.0	1.6515600887336541	0.010803424778687202	Simulations
1.4732886373609377	0.5659267564141036	1.5045158590868453	2.3535456074430074	0.8802569700820697	56.0	99.0	2.6737028929445197	0.014331708679438978	Simulations
1.262248217215048	0.6128685244457472	1.717295381317102	2.4326097939243994	1.1703615767093514	42.0	82.0	2.078511327041383	0.012872568415669805	Simulations
0.8406423409878541	0.620642304291739	1.722985333066781	1.962051756955836	1.121409415967982	45.0	59.0	1.749630178789096	0.013678813733563324	Simulations
1.0253556579207668	0.8987289557613345	2.0263193946235094	2.1842251799282506	1.1588695220074838	82.0	92.0	1.8847895629738938	0.009939167993221256	Simulations
1.054756355099129	0.5816017898388678	1.501471298410025	1.9848438243641358	0.9300874692650066	66.0	107.0	2.134039958556415	0.010220441027782915	Simulations
1.1588077718687266	0.7374616070956903	1.9451168634686233	2.378233502391477	1.2194257305227505	62.0	88.0	1.950289749398647	0.010951005423764294	Simulations
1.0883821166306642	0.5475607675879453	2.561460170688509	3.082287320632046	1.9939052040013816	31.0	52.0	1.5458544942088983	0.012084702497981884	Simulations
1.630589202018797	0.7471962396918694	2.3083882767780124	3.0955079531826075	1.4649187511638104	57.0	92.0	2.113091904054999	0.011732125166611169	Simulations
1.202876009736546	0.6580374593301437	1.8266186475198867	2.3743357523263793	1.1714597425898332	60.0	95.0	2.0268180510217606	0.01072859560842746	Simulations
0.9554309034584352	0.7309552287328267	1.8964325531181734	2.130680358840091	1.1752494553816557	65.0	80.0	1.812960090373464	0.010729339583010008	Simulations
1.3124748946326883	0.6450801210582489	2.0802393716219076	2.7262081415288497	1.4137332468961614	49.0	84.0	1.9283752062238155	0.01127840221125009	Simulations
1.5128772647465236	0.8238117304179101	1.9427044759387477	2.5265209550263856	1.013643690279862	78.0	107.0	2.492513867795917	0.012314033004504137	Simulations
1.2166085937034956	0.5228341014214373	1.745915525989462	2.4518323555350654	1.2352237618315698	42.0	82.0	1.9849297198586335	0.012062047889780308	Simulations
0.9154748871158501	0.5910168123156558	1.5815949955673636	1.9102681094714804	0.9947932223556303	51.0	73.0	1.9202665102080636	0.0128946103259839	Simulations
1.245688394350869	0.6091505096432257	1.9553534690360486	2.606366227460421	1.3606778331095521	48.0	89.0	1.9154910619100054	0.010536115661287832	Simulations
0.9805510763118575	0.5651336606121793	1.8677258192072044	2.2491619494216404	1.268610873109783	58.0	81.0	1.7729328962065443	0.010199233736537682	Simulations
1.1599537840764018	0.86155085326683	1.6949931840890673	2.0468701400640876	0.8869163559876857	81.0	104.0	2.307850256955355	0.011601438643169778	Simulations
1.1966984588452347	0.9013211480953192	2.1286204129382487	2.3831784506031175	1.1864799917578828	68.0	81.0	2.0086124225931634	0.012422212489924745	Simulations
1.3776305203494286	0.6528010922646206	1.7028410846636433	2.3650258189168074	0.9873952985673788	85.0	132.0	2.395216811694613	0.009546638277431147	Simulations
1.0450121992000057	0.8405452286718809	1.7340747145138125	2.0339195936517993	0.9889073944517938	74.0	93.0	2.056734134119114	0.011186616284275502	Simulations
0.5805432711986764	0.5645217088927144	1.8099726505770677	1.9130671464566367	1.3325238752579602	43.0	43.0	1.4356719470308106	0.012133165792169165	Simulations
0.6537458049803988	0.82911362669704	2.1559088106541853	1.8447201783946678	1.190974373414269	65.0	53.0	1.5489167689698051	0.011910558924599536	Simulations
1.4002397889975224	0.7453003703003829	2.1115805349714227	2.615021141937193	1.2147813529396707	71.0	96.0	2.1526681617305514	0.011522145231320993	Simulations
1.1085747092406504	0.696883958621059	1.4956972581374792	1.9527926150207122	0.8442179057800618	61.0	92.0	2.3131381147576127	0.013150558806204766	Simulations
1.0259333650934188	0.564382143251055	1.9320710549016678	2.3737083163529844	1.3477749512595656	47.0	72.0	1.76120524731123	0.01134115344083405	Simulations
1.1758251214787228	0.5428229078308944	1.4966816808186634	2.150533921740715	0.9747088002619925	44.0	82.0	2.2063347752299682	0.013922581864926085	Simulations
0.9030464031020805	0.5439231613769169	1.4837689911021603	1.8963507840705096	0.9933043809684291	43.0	70.0	1.9091336154398606	0.013327401097963735	Simulations
0.8701650476492593	0.4858412000570196	1.7358133938433897	2.106172198254408	1.2360071506051487	46.0	72.0	1.7040129559308996	0.010679670898432067	Simulations
0.733679084363893	0.6227886976537031	2.130883517375002	2.246935934749877	1.5132568503859842	56.0	64.0	1.4848344708809706	0.00891097044637918	Simulations
1.458153473139987	0.4951920133085558	1.4785995855322094	2.399227371212632	0.9410738980726449	66.0	132.0	2.5494569301373047	0.010228711861040315	Simulations
0.718135724832657	0.6624256206225532	1.5581307374106672	1.6834543198614993	0.9653185950288423	71.0	81.0	1.743936487425895	0.00990552468439289	Simulations
1.0280472608014453	0.6737882807055018	1.6737908891778692	2.0831409139935264	1.0550936531920811	71.0	106.0	1.9743658846692806	0.009258390295243793	Simulations
1.0454405528910273	0.7969117914830051	1.7856737602113997	2.087862048103149	1.0424214952121216	73.0	94.0	2.0028961966850956	0.010660506947857118	Simulations
1.1999272979557385	0.7792957269146636	1.9342919830005056	2.370380293819586	1.1704529958638474	52.0	74.0	2.0251819613397952	0.013757453230719167	Simulations
0.8592829786748731	0.937958465874923	1.7331893116004147	1.7912583753954232	0.9319753967205501	82.0	76.0	1.9220017842729882	0.012402758887173543	Simulations
0.9238595120039417	0.7597736570872144	1.8162310766499692	2.0580570693259235	1.1341975573219818	54.0	68.0	1.8145490228221959	0.012641338734718581	Simulations
1.0368582131680966	0.7905961854882995	2.168968696387859	2.350713821209275	1.3138556080411785	60.0	69.0	1.7891721181705378	0.012163654799679171	Simulations
1.0560845373097933	0.7581354411497316	2.033010054888147	2.34042696591068	1.2843424286008864	60.0	76.0	1.822276453531362	0.011391340050239687	Simulations
1.0887266571103615	0.6072375229676996	1.5907439718843552	2.121753580009123	1.0330269228987614	60.0	101.0	2.0539189569767475	0.010280982745318112	Simulations
0.7356166151256647	0.5662348073271025	1.4064007656719693	1.6217811327225677	0.8861645175969031	64.0	85.0	1.830112919800159	0.010258031376289532	Simulations
1.3217194314977565	0.7257290047319251	1.7921565115174838	2.4440390388319244	1.122319607334168	60.0	97.0	2.1776675938480845	0.01157509023991314	Simulations
0.7979468271683918	0.7838422789009332	2.1451623717363177	2.0924447569432982	1.2944979297749064	71.0	71.0	1.6164141392695335	0.00975770248428985	Simulations
0.7686570641935004	0.4925220070563696	1.7757189846471102	1.992346207101378	1.2236891429078776	49.0	62.0	1.6281473269975453	0.011342439538594392	Simulations
1.2562157412765331	0.7387671299446059	1.7320506616800149	2.278348797355023	1.02213305607849	61.0	94.0	2.2290139075397124	0.012302187426248657	Simulations
0.8288482152597119	0.6931552029179531	1.8134501773174612	1.9424940455148192	1.1136458302551073	55.0	62.0	1.7442655400324574	0.012945478822196713	Simulations
1.0079972243799709	0.8203282974406245	1.8878276434265158	2.0698318534441014	1.0618346290641305	79.0	91.0	1.9492977501293112	0.01058191731120071	Simulations
0.8996295575951925	0.555331791666688	1.9659042859915026	2.2873000461508766	1.387670488555684	40.0	58.0	1.6483020032598268	0.012430699974505577	Simulations
1.3358554830478677	0.6367169105096309	1.933523775315516	2.5719753501051414	1.2361198670572737	47.0	74.0	2.0806844211864552	0.014284569826118212	Simulations
1.1475605961882005	0.6839629721550088	1.7044990648898315	2.1675879797203423	1.0200273835321418	67.0	99.0	2.125029204818441	0.010984673421338931	Simulations
1.4476948607872904	0.6265065507748331	1.879281988064297	2.629616377141179	1.1819215163538888	69.0	118.0	2.224865476054016	0.00977727210009102	Simulations
1.6511862548490623	0.929630909879589	2.065534779997332	2.7389965086270953	1.087810253778033	93.0	136.0	2.517899145659263	0.009795738949464197	Simulations
2.0368964970024646	0.5888347753609391	1.726654803090799	3.0963840940119094	1.0594875970094446	64.0	135.0	2.922529817953411	0.011460872180328091	Simulations
1.2250131480905306	0.6053031542063846	1.4957443224014504	2.1202599748953506	0.8952468268048198	63.0	110.0	2.3683524045124664	0.01130803423735022	Simulations
1.0008718656100355	0.6435591755346917	1.6620837946954587	2.0439360991318773	1.0430642335218419	67.0	95.0	1.9595495976605903	0.010216021990408882	Simulations
1.10182609627505	0.5805824517936311	1.8580429412268167	2.4065519031189213	1.3047258068438714	56.0	102.0	1.844488620134191	0.00865902831493874	Simulations
1.3779762042076695	0.7391349135577214	1.8660551304704713	2.476130094110436	1.0981538899027663	83.0	124.0	2.254811567739089	0.009459732854773313	Simulations
0.9853698345306803	0.7112010015356098	1.9374105814054996	2.2615204050334192	1.276150570502739	55.0	76.0	1.7721422983359199	0.010861769120228152	Simulations
1.5549483632764631	0.7006710355072832	2.158215609811291	2.9251997496946114	1.3702513864181483	58.0	92.0	2.1347905783486305	0.011892332057447549	Simulations
1.3559956796697155	0.7194607170511145	2.018626982005342	2.7179602343509996	1.3619645546812842	56.0	102.0	1.995617452017343	0.009772894030686695	Simulations
1.11008059138534	0.7824251902151793	1.850705096299841	2.2092424505648953	1.0991618591795553	54.0	73.0	2.009933689123761	0.013796546649438206	Simulations
1.4133559878678486	0.711782211270909	1.9895834494365874	2.55061647484843	1.1372604869805816	76.0	109.0	2.2427724378434166	0.010690671975040176	Simulations
0.5716854574331803	0.491006585672249	1.4230201296960252	1.5008070728606115	0.9291216154274312	57.0	63.0	1.6152966930708885	0.010980939354796559	Simulations
1.0806412821339801	0.7548551533158461	1.653079945244558	2.0855098781310333	1.0048685959970531	64.0	94.0	2.0754055668957827	0.0112063115884613	Simulations
1.291714078391201	0.6367465341314439	1.5276382005360414	2.2172033567815355	0.9254892783903345	63.0	111.0	2.395709392374406	0.011355431666379376	Simulations
0.5430071163374055	0.4101280811845702	1.5778559255662667	1.7212578863407308	1.1782507700033253	38.0	48.0	1.4608586984720349	0.011392013338357269	Simulations
1.4349203112192381	0.533903489564922	1.6803811029135245	2.624128337402806	1.1892080261835678	39.0	89.0	2.2066184213574607	0.012829631165167443	Simulations
0.6497287505602469	0.9957513536486311	2.154594967409473	1.7732889237459803	1.1235601731857334	90.0	64.0	1.5782767724117626	0.010286722247476274	Simulations
1.2910694101163955	0.7701155637678792	2.110775627036115	2.589593798926533	1.2985243888101377	61.0	85.0	1.9942588843475066	0.011715914177442449	Simulations
1.4436369737500665	1.0478139818259689	2.432143719562129	2.727164239726515	1.2835272659764483	86.0	100.0	2.124741960702965	0.010872876437827817	Simulations
0.9082621975050569	0.8033322220762089	1.9321241707163885	2.0242128107742206	1.1159506132691637	70.0	75.0	1.8138910330846219	0.011454503874982782	Simulations
1.0111236414785025	0.7955152358388922	1.8882820557087774	2.135933070521974	1.1248094290434716	69.0	86.0	1.8989288455186168	0.010757974970791956	Simulations
0.9779221871864587	0.5013246827997784	1.531998728153982	2.003378422397921	1.0254562352114625	53.0	91.0	1.9536459515357067	0.010617242190560663	Simulations
0.7862466671415962	0.6497438175946033	1.8505170029979745	2.056084833227447	1.2698381660858507	49.0	63.0	1.619170763755765	0.011035795962470105	Simulations
1.164103230784662	0.6772509361667376	1.608599947663761	2.10894347979716	0.944840249012498	75.0	108.0	2.2320635493686125	0.010725723175074484	Simulations
1.1077234563610823	0.5309789710698523	1.8374558383822865	2.3553669984019248	1.2476435420408425	59.0	93.0	1.8878525147888916	0.009857484527401678	Simulations
1.060958104524819	0.6203993173387283	1.955713858205287	2.4533433943634773	1.3923852898386582	35.0	61.0	1.7619716412313986	0.01339656892464878	Simulations
1.3313653751041548	0.5836919029434675	1.7597696677706394	2.459478964446027	1.1281135893418721	50.0	87.0	2.1801696102968293	0.012924602028474046	Simulations
0.9533276918223372	0.8667241379851931	1.8698621731148701	2.004302366164385	1.0509746743420478	100.0	111.0	1.9070891193635646	0.008390741109811261	Simulations
0.9211569506556025	0.7007670384349487	1.7215584243548705	1.9428848101633769	1.0217278595077743	69.0	83.0	1.9015678119018673	0.011170956480766504	Simulations
1.2418990754837602	0.9390753702548453	2.3923041565030454	2.6009567683887753	1.359057692905015	65.0	74.0	1.9137942281384495	0.012654536744046735	Simulations
1.2709410100632363	0.692036242034096	1.8471502878245143	2.42732179110752	1.1563807810442837	63.0	97.0	2.0990679116229325	0.011028338589967738	Simulations
1.034217022366435	0.7135294337113891	2.05233446899632	2.341559404552981	1.307342382186546	59.0	75.0	1.7910835267473655	0.011211101581696572	Simulations
1.0689431348721654	0.6994183325919237	1.6831355990411572	2.1124633148683616	1.0435201799961962	63.0	93.0	2.0243626863795408	0.010940513844569559	Simulations
1.159799540368057	0.572782578288179	1.7892122282571388	2.3525134524665603	1.1927139120985033	49.0	81.0	1.9724037999418187	0.012098209103503723	Simulations
1.4978042807171428	0.5619466661760832	1.977740623112175	2.854495930840801	1.356691650123658	46.0	87.0	2.10401230860426	0.01233497867254686	Simulations
1.2448750908596853	0.4954837820121518	1.6191551748366944	2.3995303140974005	1.1546552232377152	47.0	102.0	2.0781357636515847	0.010345979489441048	Simulations
1.3795124537820003	0.6715362507468046	1.786043885506677	2.432330416402076	1.0528179626200755	78.0	121.0	2.3103048226389515	0.009984158793561237	Simulations
1.289294747446442	0.7237960475728867	1.3426989451004776	1.9771501297200145	0.6878553822735723	85.0	134.0	2.874368916304658	0.011367501784309267	Simulations
0.7955538478319419	0.6291194593871086	1.6811675600922549	1.9174647417609871	1.1219108939290452	55.0	72.0	1.7091060904541466	0.010739471571408088	Simulations
1.3288926730176447	0.5601384248559128	1.5744813686904433	2.2850416735079846	0.9561490004903399	69.0	119.0	2.3898384795007384	0.010562295083909278	Simulations
1.3058299536466178	0.8073213141158513	1.8747113508348863	2.3343218927670475	1.0284919391204297	59.0	82.0	2.2696550201097043	0.014420402797691597	Simulations
1.6808752267382283	0.6562230220616858	2.097069529724902	3.1064162460352107	1.4255410192969824	40.0	79.0	2.1791138970993384	0.014224577274204927	Simulations
1.3853491587742601	0.5205346902310993	1.4397014085329702	2.334886126150065	0.9495369673758051	39.0	85.0	2.4589733800495317	0.015271248434439104	Simulations
1.0282236134212566	1.033926084616296	2.1482557711473604	2.2171119717349206	1.188888358313664	92.0	96.0	1.8648613692203222	0.009365295696347604	Simulations
1.0213892376584035	0.5728413145262847	1.5656679726545708	2.0365845202648774	1.0151952826064738	65.0	107.0	2.006101244911252	0.009386863723695037	Simulations
1.2210769034026823	0.6845347351011408	2.035315998515958	2.5647752673787543	1.343698363976072	56.0	86.0	1.9087433133351843	0.010844454686227247	Simulations
1.4269653095673847	0.5870436290906627	1.7895148670138512	2.591619306841142	1.1646539972737573	64.0	115.0	2.225226816640522	0.010034368669626483	Simulations
1.0637577653975456	0.722450347012056	1.874491978679317	2.2017022849144285	1.137944519516883	80.0	103.0	1.9348063522896235	0.00924455514088245	Simulations
1.1828351862091955	0.6552148986751472	1.6485030138253518	2.168596433595622	0.9857612473864266	61.0	93.0	2.19992055819325	0.012230660507721824	Simulations
1.0134800416898508	0.4870949092556609	1.6520621900259955	2.185942026023872	1.1724619843340214	47.0	86.0	1.8644033284077224	0.010450162715685345	Simulations
1.0493676440243696	0.6011477016507234	1.8776980715798839	2.304591068802103	1.2552234247777334	54.0	80.0	1.8360006858621083	0.01095708247111817	Simulations
1.0546882961284367	0.6533120801072498	1.6336897851068097	2.02223227903107	0.9675439829026333	75.0	105.0	2.09006754707354	0.010129043507282652	Simulations
1.0998407043861496	0.8796390443076658	1.910540043006146	2.2162735713584167	1.1164328669722672	61.0	79.0	1.9851382352876128	0.012522018646468677	Simulations
1.5348485767981102	0.5735618312296837	2.0680857337782044	3.03332034894848	1.49847177215037	38.0	87.0	2.024275935872678	0.011694321402971915	Simulations
0.8349098170175275	0.6813183575236228	2.220002883121073	2.3956271593845457	1.5607173423670182	42.0	51.0	1.5349526107983684	0.012121453242862228	Simulations
1.0885065729424883	0.7459148712135453	1.748249333496547	2.1308293200441466	1.0423227471016583	66.0	91.0	2.044308565623509	0.01133640627988588	Simulations
1.2994621219302251	0.7209722986271068	1.9984122593888805	2.531345277106269	1.2318831551760439	50.0	74.0	2.0548582602743064	0.014041065990840148	Simulations
1.1926042303594924	0.5410152428373969	1.6128740976142304	2.255691078370614	1.0630868480111217	63.0	105.0	2.1218314219489014	0.010336286092135953	Simulations
1.14097249601754	0.8771593347630424	1.7034022167629614	2.1219140360174804	0.9809415399999405	69.0	98.0	2.1631401561581427	0.01135844025251766	Simulations
0.936615960528421	0.636046082934626	2.1891469964221892	2.450649342448386	1.514033381919965	52.0	67.0	1.6186230579280136	0.010369657499818868	Simulations
0.9700427641344092	0.7722486875793522	1.7678213645789242	2.0777112369537933	1.1076684728193842	56.0	76.0	1.8757518950280567	0.01194038178633776	Simulations
1.1587334890978442	0.7596400730384568	1.4630487608494291	1.9318516109534678	0.7731181218556235	87.0	128.0	2.49877936675016	0.010322058767608515	Simulations
1.0245452420089944	0.7060356501444595	1.5626336748507659	1.8517111340469976	0.8271658920380033	91.0	113.0	2.2386212389448024	0.010288588085303042	Simulations
0.9595300475287167	0.7307110502774137	1.7105900715393911	1.9649039487324638	1.005373901203747	71.0	88.0	1.954401189825854	0.010985530079781624	Simulations
1.4799416379500592	0.6489945765819762	1.9472841270693246	2.731176224255761	1.251234586305702	64.0	111.0	2.182785110120413	0.010145676644191852	Simulations
1.1450105595840054	0.4705896685326536	1.8563023744375478	2.4932832812074905	1.348272721623485	40.0	77.0	1.8492425465711957	0.011518629363255747	Simulations
1.429664475270762	0.5938165094166659	1.7593277195919264	2.6152890106917406	1.1856245354209787	49.0	95.0	2.205832396816191	0.012013928173507308	Simulations
1.2489179945216267	0.678130295293063	2.2847140088806976	2.8548918487467	1.6059738542250732	45.0	73.0	1.7776701913520654	0.01136969435361855	Simulations
0.7045500854718345	0.6051434446197901	1.8069386787722204	1.9055835374098855	1.201033451938051	66.0	74.0	1.5866198683599821	0.0089994124362463	Simulations
1.2140409025860832	0.7029081732738818	2.0362370671578143	2.569888520421934	1.355847617835851	44.0	67.0	1.8954110230498367	0.01376881691275317	Simulations
1.0380833671744374	0.7765270100078832	1.661536449542161	2.0122644107620253	0.9741810435875878	74.0	103.0	2.0655959423635655	0.01016075797810213	Simulations
0.87452284731527	0.6471737936773456	2.0046167763936507	2.1983582146133003	1.3238353672980303	64.0	77.0	1.6605978877118122	0.009502633354300545	Simulations
0.9894629247896449	0.7302389595998342	1.7842896681559608	2.1008252727837524	1.1113623479941075	60.0	81.0	1.8903153202693268	0.011341072938460222	Simulations
1.3874166359482378	0.775874008208493	1.8864533513732842	2.565859001544122	1.178442365595884	54.0	95.0	2.177330921267995	0.011816428336313144	Simulations
0.9622723623441451	0.4987212655112705	1.7907860166279723	2.2494194540321524	1.2871470916880072	45.0	77.0	1.7476009296514738	0.010459425692845633	Simulations
1.1064846203432828	0.5318182180820272	1.4094659325679657	2.067392163570508	0.9609075432272254	46.0	97.0	2.151499567405969	0.01139528402277233	Simulations
1.1945076339794873	0.5892797738854774	1.6113562758645075	2.250421034606133	1.0559134006266455	54.0	96.0	2.1312553030112045	0.011371910665310483	Simulations
1.5593953936838052	0.6789556789990947	1.8610542157508194	2.7256438197266615	1.1662484260428563	48.0	84.0	2.337103964182758	0.014580022769907238	Simulations
1.432635172029953	0.77403549498343	2.0560583281352844	2.756913369515822	1.3242781974858688	46.0	76.0	2.0818234225631738	0.01391904876830932	Simulations
1.0890359152078593	0.9776602370630624	1.8742898063670463	1.9851555301904735	0.8961196149826144	118.0	126.0	2.215279631200783	0.00910705412190417	Simulations
1.7489623690956018	0.7133981613630485	2.1354343594631424	3.148590767687941	1.3996283985923395	60.0	117.0	2.249590513349544	0.009997114663327455	Simulations
0.9978510791712953	0.5768497611219912	1.7202488980741895	2.1297240782868827	1.1318729991155874	55.0	80.0	1.8815927934944885	0.011399430497144623	Simulations
0.9764186507893939	0.7755543851172659	2.222950953813338	2.3558503475915855	1.3794316968021916	76.0	84.0	1.707841245820967	0.009192546118527866	Simulations
0.9410337667612623	0.8058388706551731	1.9234549804564993	2.1522608124079676	1.2112270456467054	55.0	69.0	1.776925986043203	0.012020052033603299	Simulations
0.8499088026692496	0.9921003146498399	2.086843043380162	1.8966637618988937	1.0467549592296441	84.0	74.0	1.8119462871183694	0.011588380934159362	Simulations
0.957660795131839	0.8510929242997498	2.033062626349753	2.125775935402777	1.168115140270938	76.0	81.0	1.819834245885825	0.010664284603466924	Simulations
1.8247923093160079	1.092924667624321	2.4502946000503574	3.1199062724366797	1.2951139631206718	89.0	123.0	2.4089820365452916	0.010312387281575726	Simulations
1.3456157343800403	0.6091097080364505	1.7969387051925272	2.483433362998011	1.1378176286179706	61.0	98.0	2.182628657295869	0.011490476505177786	Simulations
1.5353841940979425	0.9539722198298772	2.2658481772554664	2.763170004634459	1.2277858105365167	73.0	96.0	2.2505309809917184	0.012190264844967895	Simulations
0.9283418820341007	0.5726226134616403	1.775301170144294	2.1269035036127484	1.1985616215786477	60.0	86.0	1.7745466443447142	0.009621517400585535	Simulations
1.2259489977855518	0.8404502492992019	2.2531125160798866	2.58911471319455	1.3631657154089982	58.0	73.0	1.899339664963422	0.01267805383986666	Simulations
0.5157480469133784	0.6458753596407709	1.8245674211247622	1.7392225342304788	1.2234744873171004	48.0	39.0	1.4215437692079202	0.013011756927000634	Simulations
1.0630386064431583	0.4624885944463186	1.4828104707667553	2.137572298720563	1.0745336922774047	45.0	98.0	1.9893022564886882	0.010125127523384065	Simulations
1.191755199816978	0.6804896287872007	1.9175171912240832	2.3863036256541794	1.1945484258372014	58.0	85.0	1.997661688752161	0.01174485033155594	Simulations
1.6791429416523969	0.6184986545543552	1.9624271592002425	3.0274723751301402	1.3483294334777434	53.0	123.0	2.245350653898719	0.009487323305942515	Simulations
1.184656950000154	0.8455824677992251	1.622339767407459	2.052096050711563	0.867439100711409	80.0	110.0	2.365694662632324	0.01129330798889017	Simulations
1.3771420987736653	0.5710152189489629	1.538764367218835	2.3335516694676515	0.956409570693986	66.0	120.0	2.4399083206312846	0.010723557830422191	Simulations
1.1973603697899189	0.6137578429847024	1.6947402152832032	2.2977937641120256	1.1004333943221067	51.0	89.0	2.088080728890931	0.01193457854073917	Simulations
1.3010797409879875	0.7065698548178478	1.8091889658141553	2.446930496553394	1.1458507555654065	53.0	91.0	2.135470509286338	0.012028065654831723	Simulations
1.1727856718383565	0.48944554530890394	1.7064440952038922	2.3754380581446504	1.202652386306294	46.0	84.0	1.9751659624942275	0.011690165240839127	Simulations
1.0703229627716815	0.8097101320160729	2.0945027169004207	2.3640181950141743	1.2936952322424928	48.0	60.0	1.827337796488886	0.014495722518951466	Simulations
1.209359687270292	0.7156240299670049	2.049111807562659	2.5018602668955423	1.2925005796252502	55.0	79.0	1.9356743867928754	0.012061218826433356	Simulations
0.9370753291309375	0.6527697166456807	2.0232669004435437	2.270876234127605	1.3338009049966677	55.0	69.0	1.7025601239438946	0.011126170235443945	Simulations
1.3322920005828414	0.7216503355025992	1.8426172189042278	2.5009213781169466	1.1686293775341052	67.0	117.0	2.1400466445521644	0.009381557624056475	Simulations
1.443066727701689	0.5210374550360961	1.7507977763748697	2.6676317537384078	1.2245650260367187	41.0	86.0	2.1784320938612356	0.013061513281729392	Simulations
0.9622211669514797	0.6401723764044593	1.983058266024113	2.291949198216284	1.3297280312648043	33.0	44.0	1.7236225335764628	0.017850996922457996	Simulations
1.3669039463952861	0.6848896251633892	1.724592399335219	2.3350314536312777	0.9681275072359916	71.0	106.0	2.4119048742843834	0.011982764229769306	Simulations
1.141036725638026	0.5858168298796513	1.9180209622316329	2.4127059607861066	1.2716692351480805	49.0	76.0	1.8972747740532994	0.012156955699058919	Simulations
0.79651693462751	0.7059805909111143	1.8151772740758445	1.8641671219726286	1.0676501873451185	77.0	80.0	1.746046733348285	0.010051152169419549	Simulations
0.7510387212879865	0.7938706936566571	1.9681516776782346	1.9653270451813092	1.2142883238933226	71.0	67.0	1.6185011471410364	0.01036803564302728	Simulations
0.8041716685656265	0.5839870845073755	1.318692123456283	1.6241753576608025	0.820003689095176	52.0	77.0	1.9806927447521374	0.012805261029968333	Simulations
1.3276035451563104	0.7858634408843741	1.684896052281915	2.272166220343962	0.9445626751876517	64.0	96.0	2.40552192038772	0.013191145271667804	Simulations
1.1841768541422697	0.6332988377433231	1.8318504446444863	2.33518649772113	1.1510096435788602	69.0	106.0	2.0288157538457123	0.009628658992692718	Simulations
0.7423233269658103	0.6541682919992404	2.3709020706928188	2.4702962762318705	1.7279729492660603	45.0	50.0	1.4295919836483002	0.010312068993768235	Simulations
1.3879857372803324	0.5886079655005656	1.9508000364515081	2.72721549097007	1.3392297536897377	47.0	86.0	2.0364059889322697	0.011930525739408601	Simulations
0.8623866087773338	0.573176577329075	1.4618649222528823	1.7848639756498648	0.922477366872531	59.0	86.0	1.9348593686380375	0.011072426869681896	Simulations
1.0030927186769434	0.8231342104569632	1.9167026154400717	2.1247881351998905	1.1216954165229471	82.0	96.0	1.8942647922966016	0.009600395978412392	Simulations
1.2146973073133445	0.7489331558995636	1.752678177881863	2.2594426096794082	1.0447453023660638	74.0	110.0	2.16267314584941	0.01011650582755243	Simulations
1.4473824373248598	0.6735054128865794	2.1317272568773515	2.8570027059021506	1.4096202685772907	58.0	99.0	2.0267888945621375	0.010294907363613633	Simulations
0.8531939636920933	0.5729557197562296	1.7513320879998893	2.0851170553401692	1.231923091648076	52.0	78.0	1.6925708020869095	0.009733540827861714	Simulations
0.9023331132181964	0.9207337672211624	1.7875233776048047	1.8888939844270323	0.9865608712088358	69.0	67.0	1.9146248747049588	0.013985996387915397	Simulations
1.2472842283509742	0.677876500331917	1.7455866740275432	2.290468419081664	1.04318419073069	57.0	90.0	2.1956510072083475	0.012607208445433967	Simulations
0.7741363634993346	0.5725872512731485	1.7435402838991292	1.9682448759681561	1.1941085124688215	42.0	55.0	1.6482964951810002	0.013108650500086257	Simulations
1.3836033805440353	0.5183938604950713	1.5399372529421826	2.4099174409681527	1.0263140604241174	63.0	130.0	2.3481286419989904	0.009473164988618549	Simulations
1.109262516911124	0.7862206880049296	2.240599521994969	2.618087018117008	1.5088245012058839	55.0	76.0	1.7351832608925548	0.01046168474581227	Simulations
1.0798415182850465	0.695623612681296	1.6296548935017183	2.069106366407191	0.9892648481221443	53.0	77.0	2.0915595761184056	0.01382570249852189	Simulations
1.035591716004137	0.7016108617963723	1.7308261840561256	2.0506643247322893	1.0150726087281523	51.0	66.0	2.0202144231846573	0.01537133980394074	Simulations
1.1755677650267713	0.7204695951579446	1.7723371783862114	2.175818420358269	1.0002506553314978	59.0	80.0	2.1752731765391053	0.014014957372307332	Simulations
1.3474158460762544	0.7150830302929645	1.872954037954061	2.4837516468194756	1.1363358007432212	56.0	86.0	2.185754990025815	0.013117810379594698	Simulations
0.9239728331137314	0.7284609753947333	1.9254391369569137	2.1175976548056634	1.193624821691932	60.0	71.0	1.774089828162273	0.011649000845251643	Simulations
1.0971810893997727	0.831690769225188	2.1415601163649995	2.400229963849628	1.3030488744498554	64.0	78.0	1.8420106957714846	0.011298479981655637	Simulations
0.7671082963968243	0.6667366933760417	1.790215377451578	1.8998168295897906	1.1327085331929663	69.0	77.0	1.6772336165195474	0.009689398068673869	Simulations
0.8686382516153349	0.7610165106124414	1.798965355575285	1.841373648339668	0.9727353967243332	77.0	79.0	1.8929851371096977	0.011653963084511705	Simulations
0.8945229763086333	0.5834536740514074	2.234150020746557	2.4690072589308856	1.5744842826222523	49.0	62.0	1.5681371266652688	0.010468576165779635	Simulations
1.398384216100091	0.6964952240867122	1.7743982469982067	2.5295173991298467	1.1311331830297557	55.0	102.0	2.2362684050648216	0.011383268196840508	Simulations
1.0764848615611324	0.5981648651272693	1.4281036038102366	1.894624587881335	0.8181397263202025	55.0	81.0	2.315771410346867	0.014956701876749528	Simulations
1.1816678148125712	0.7264730812109874	1.8976265423497913	2.289181442413538	1.1075136276009667	84.0	112.0	2.0669555528379666	0.009352744337826456	Simulations
1.3070635718254855	0.630580252884186	1.8566014928696741	2.556164930985436	1.2491013591599507	46.0	82.0	2.046403129930557	0.012598663120800054	Simulations
1.070902127163016	0.6666182542257759	1.9440256101804392	2.323252301960889	1.252350174797873	54.0	74.0	1.8551139678930915	0.01204740298290233	Simulations
1.3885862678284644	0.7435947126103923	1.8607007878945028	2.475368372888803	1.0867821050603386	55.0	85.0	2.2777043911220543	0.013971535540128787	Simulations
1.254259156420161	0.40527665107929844	1.5777381733244755	2.441877503801882	1.1876183473817208	34.0	85.0	2.0561129837589323	0.012234347565275371	Simulations
1.2261617780801077	0.8271463825449039	2.112859443712354	2.514728111400024	1.2885663333199164	87.0	118.0	1.9515705527716007	0.008174878133304076	Simulations
0.7629172225645553	0.8519869091712602	2.159602206565741	2.0152018685113533	1.252284645946798	73.0	66.0	1.6092202959078419	0.010399421800585408	Simulations
0.7382679096399329	0.7772702222259203	1.6555003297545854	1.659901939937669	0.9216340302977362	80.0	76.0	1.8010423718853281	0.011168843722862564	Simulations
1.201347251386325	0.6694119059839803	1.9762543761560352	2.483581617957069	1.282234366570744	50.0	77.0	1.936917058773938	0.012386521782422808	Simulations
0.9082334166387054	0.6489695785728942	1.7570947316576604	2.0200234572121474	1.111790040573442	47.0	61.0	1.8169109125768517	0.014122748894573834	Simulations
0.8614858985940206	0.6325470780858042	1.7278529975798618	1.9920994998921457	1.1306136012981252	53.0	70.0	1.7619631478030133	0.011674053571471842	Simulations
0.4240123941467595	0.5546138300220202	1.6077685305848437	1.6484176753079112	1.2244052811611517	50.0	39.0	1.346300690360182	0.011000017065455517	Simulations
1.1638069228576036	0.5498730899856761	1.7884459656201515	2.3492014460467163	1.1853945231891128	48.0	78.0	1.9817886788666517	0.01265132223031867	Simulations
0.9197097505654295	0.4540547546514526	1.6673586979476906	2.1663783193814834	1.246668568816054	35.0	67.0	1.737733968410599	0.011898615452219078	Simulations
1.107905155357148	0.7266564358276418	1.7011314369397612	2.1073751819623983	0.9994700266052503	63.0	91.0	2.1084926269577116	0.011826505239177892	Simulations
1.2879619916695697	0.8305579860564982	2.173489891680354	2.577887594021481	1.2899256023519112	56.0	75.0	1.9984777333834127	0.013318686648595085	Simulations
1.5407654616462423	0.6394483888718085	1.6605318119522638	2.515045489371683	0.9742800277254406	74.0	124.0	2.5814400560415076	0.011033678205461753	Simulations
1.181204057444213	0.6616916618638431	2.05892177467366	2.5628543378508386	1.3816502804066255	56.0	84.0	1.8549226053763617	0.01061141658599932	Simulations
1.3584954464104022	0.7027347765153579	1.7784318086382225	2.378972342211635	1.020476895801233	88.0	131.0	2.3312358682493954	0.009321335724439512	Simulations
1.156619487560937	0.5535680098551181	1.808444349831927	2.400675255783936	1.244055768222999	52.0	90.0	1.9297167515352183	0.010537656675402981	Simulations
0.89807877198061	0.6261246289649227	1.9716305217099201	2.2512860540529025	1.3532072820722925	50.0	68.0	1.6636668187340067	0.010799507867465976	Simulations
1.1840669749245867	0.8643517387849884	2.0848174510786937	2.402276479191713	1.2182095042671264	66.0	82.0	1.9719731875158208	0.011946828485891943	Simulations
0.8459773174542007	0.6339928109649333	1.9906393821096902	2.1803361310659715	1.3343588136117708	42.0	52.0	1.6339953757747923	0.013623151935504918	Simulations
1.5682373999564145	0.489379630136342	1.8329041717515602	2.930692647944177	1.3624552479877625	33.0	85.0	2.1510377329989927	0.013000386263537694	Simulations
0.8017350380122295	0.6370744066687739	1.5101719821923085	1.7594745069313054	0.9577394689190759	68.0	88.0	1.8371118284569432	0.009970902825982918	Simulations
0.838737918551222	0.7215166676978568	1.794072832552376	1.923433824028286	1.084695905477064	56.0	63.0	1.7732470587526867	0.013117358009952677	Simulations
0.6226031924800457	0.7182671570118733	1.7812872466946912	1.6355931632660592	1.0129899707860135	67.0	59.0	1.6146193056550664	0.011715153337439606	Simulations
1.590843507966432	0.4567322784804555	1.9206848541521353	3.0511240808824827	1.4602805729160506	37.0	104.0	2.0894094857330456	0.010222069824434566	Simulations
0.9072262587084441	0.6113823761761865	1.9914694504186157	2.3244221096305284	1.4171958509220843	39.0	56.0	1.6401558811495012	0.012747016709683687	Simulations
1.2435148532998395	0.5904954512698966	1.7205152709217049	2.393272899430705	1.1497580461308656	47.0	89.0	2.081544815002149	0.011883759770571614	Simulations
0.8413606746473234	0.8413606746473234	2.2441334239038424	2.0811091298527695	1.239748455205446	60.0	59.0	1.6786543440442494	0.012666189692816616	Simulations
1.0842156705289656	0.42294441963697915	1.5928555729374536	2.260598531239	1.1763828607100342	36.0	76.0	1.9216520460648	0.012399304350900541	Simulations
0.7463915400345794	0.6955901103220621	1.318135026172961	1.465358131075131	0.7189665910405515	71.0	83.0	2.038144956018521	0.012376586287387572	Simulations
1.030654083032888	0.7233985845771453	2.2250962720534386	2.4291275030186044	1.3984734199857163	58.0	68.0	1.73698510697716	0.011714490946185114	Simulations
1.172745986251745	0.8078292402890449	1.7537863797975792	2.1243266910407694	0.9515807047890243	82.0	109.0	2.2324188377818732	0.010629428673589566	Simulations
1.383543509253153	0.6026054234199011	1.4900982755775043	2.3157890167014563	0.9322455074483034	71.0	145.0	2.484097802777425	0.009053255005617574	Simulations
1.1329054432526353	0.7300964033883727	1.6795537966215546	2.0852314019273015	0.9523259586746662	85.0	117.0	2.189619408074603	0.00966393271326506	Simulations
1.3567056058576574	0.5937136908933152	1.7470429427289476	2.4653703217665104	1.108664715908853	57.0	95.0	2.223729398428151	0.012136644629640944	Simulations
1.3798023004794921	0.8072404175104009	2.37963952611972	2.9054432773946752	1.525640976915183	61.0	87.0	1.904408259451333	0.010682101046133685	Simulations
1.3622890414987392	0.5758754270184507	1.6291609576835913	2.3853336722560665	1.0230446307573273	50.0	86.0	2.3316027478588888	0.014201418686214062	Simulations
1.0978836990312855	0.5681529098369281	1.4675285787869654	2.0227606723911182	0.9248769733598328	64.0	107.0	2.1870591772254477	0.01055132950663796	Simulations
0.9849496441423677	0.7310202818952689	1.8647483208004354	2.1579757442075578	1.17302610006519	51.0	66.0	1.839665582963269	0.013324902044715821	Simulations
0.8937145881743482	0.75485322050894	1.7896714349016312	1.9394647735620152	1.045750185387667	60.0	69.0	1.8546157587751628	0.012914787228166668	Simulations
1.1870782605388763	0.5258289212776017	1.5832791097663548	2.2502449502667856	1.0631666897279093	48.0	92.0	2.1165495232386173	0.01175776353668394	Simulations
1.1854281603671626	0.7173129712497912	2.0759065406118054	2.5207644235785396	1.335336263211377	57.0	80.0	1.887737563208463	0.011458227656108908	Simulations
1.2692320628065	0.7479461010843966	1.8087036104422392	2.2950571005902916	1.0258250377837916	70.0	97.0	2.237279278685348	0.011976756275136965	Simulations
1.1363280409798895	0.7681203454173893	1.7289654708731805	2.151574501427346	1.0152464604474565	64.0	92.0	2.1192632382870538	0.011777856512207384	Simulations
1.1937486562829838	0.6576717046934082	1.6778720013734127	2.2774871391509133	1.0837384828679295	57.0	98.0	2.101509889289832	0.010932920872891216	Simulations
1.2821076373444935	0.5762408482014196	1.6426955232010803	2.3403171139297743	1.0582094765852808	53.0	94.0	2.211582078703081	0.01218168921424599	Simulations
1.4543729360836084	0.675635066078798	1.8730565025107673	2.603916821314304	1.1495438852306956	56.0	90.0	2.2651739135576703	0.01310690911680189	Simulations
1.7081038214382536	0.839369650278087	2.4224691166294536	3.2641026798957595	1.555998858457506	58.0	100.0	2.0977539039659274	0.010688454394248054	Simulations
0.7966185549208384	0.7966185549208382	1.9975775710205514	1.9689455548483479	1.1723269999275094	59.0	58.0	1.6795190718716682	0.012897382383943468	Simulations
1.1153207011720572	0.9886089341536666	1.9733708832759884	2.166589731922844	1.051269030750787	81.0	92.0	2.0609279533094647	0.011340152950930892	Simulations
0.9476364160477301	0.8110064885482023	1.797958513564178	1.913321478175087	0.9656850621273568	69.0	75.0	1.9813100080062682	0.01315272841159291	Simulations
1.184305323914818	0.7049400111303374	1.8055592262207796	2.2600112790109934	1.0757059550961754	68.0	96.0	2.1009563703762644	0.011156731276225915	Simulations
1.0540496137295445	0.6427910636771546	1.6859784960161726	2.0668869719492333	1.0128373582196888	64.0	88.0	2.0406899046282185	0.01169382923463636	Simulations
0.8232277942089985	0.6004026232850648	1.8256740270347156	2.04355096152629	1.2203231673172914	36.0	45.0	1.6745981853468772	0.0165292214863078	Simulations
1.1110294559863434	0.768625506901436	1.7667493059088712	2.1296857691798032	1.0186563131934598	91.0	117.0	2.0906813628860714	0.009093788034504039	Simulations
1.131475712512652	0.7262593621221651	2.211335580400063	2.5748673557280584	1.4433916432154064	95.0	125.0	1.783900695165515	0.00668028245309802	Simulations
0.914921761074392	0.7187193612742173	2.3982486710841195	2.4741716536874834	1.5592498926130913	67.0	71.0	1.5867704499508462	0.009381597688436069	Simulations
0.9667275473908739	0.6578314637404461	1.779865951979541	2.132725148177537	1.1659976007866633	65.0	92.0	1.829099087972953	0.009468839483374396	Simulations
1.227094503980047	0.8776597314380619	1.7969828048520453	2.1905005292924375	0.9634060253123906	85.0	111.0	2.273704410953994	0.010676078480393944	Simulations
1.3635175058437505	0.5754942922994406	1.4200627640256482	2.2618097596591866	0.8982922538154361	69.0	136.0	2.5178996591057103	0.009795741112642949	Simulations
1.1215813787976496	0.6941371198214832	1.716254454826597	2.112531208132179	0.9909498293345295	78.0	101.0	2.1318245844503	0.010812759722046653	Simulations
0.6588673078770666	0.6274136223697264	1.7281216416750933	1.7977352542987188	1.1388679464216522	51.0	55.0	1.5785282744564388	0.011974183678292998	Simulations
0.9404311655977636	0.6811194652229287	1.5567081461578085	1.849350355172393	0.9089191895746295	62.0	82.0	2.0346697224402113	0.012497495465461955	Simulations
0.7416842112620881	0.6337273525992689	1.521243493070861	1.6383749139408785	0.8966907026787905	52.0	59.0	1.8271349407843382	0.014738698073772179	Simulations
1.143306948372145	0.8111144844494664	1.8970705656335083	2.1751561657163276	1.0318492173441827	106.0	127.0	2.1080174594838934	0.008471549732515377	Simulations
1.4320644794331252	0.6470410443012856	1.6685360855452493	2.4051678375954397	0.9731033581623146	80.0	132.0	2.471646837328307	0.009889944073198794	Simulations
1.3245836851694837	0.6676389579551152	1.9168959891082777	2.5116552937618444	1.1870716085923607	77.0	118.0	2.115841433306779	0.009162978916625921	Simulations
0.6650575435086596	0.5850248493249932	1.614390254095774	1.6746456184391052	1.0095880749304456	63.0	67.0	1.6587414808306626	0.010896851582733506	Simulations
1.1330734539921719	0.7935819311464425	1.9877679087428906	2.30683107917624	1.1737576251840682	66.0	84.0	1.9653385244798591	0.011604498028322882	Simulations
0.988214765953353	0.6230006288003326	1.6196488486612115	1.9586950227955844	0.9704802568422314	77.0	103.0	2.0182739514648413	0.009836136045608103	Simulations
0.981492699334251	0.5508378539644354	1.6452147612510595	2.0647907639044236	1.0832980645701726	49.0	73.0	1.906022757202732	0.012747470473874407	Simulations
0.761916376215141	0.792631883276879	1.60262729727714	1.6533576864131265	0.8914413101979856	73.0	76.0	1.854701669643201	0.011726146668037651	Simulations
1.5638205657498916	0.6769544353453875	1.6561876139497993	2.486833843928079	0.9230132781781873	75.0	122.0	2.6942557628602137	0.011720383695253234	Simulations
1.2711326840067207	0.6947969454557137	1.9357177545338253	2.514406195270432	1.2432735112637112	46.0	73.0	2.022407919488844	0.013918822165022148	Simulations
1.6421147305228927	0.5891946159978398	1.8023838333440534	2.7480471722125843	1.1059324416896916	63.0	112.0	2.484823727581405	0.011724495635699623	Simulations
1.304742145744282	0.507440449618235	1.7421981340407626	2.49871947167442	1.1939773259301378	42.0	80.0	2.092769617486543	0.01331766876589753	Simulations
1.0953139608837281	0.7453473493922862	2.236154556784781	2.442573309481569	1.347259348597841	56.0	66.0	1.812994144018132	0.013005670684485366	Simulations
1.1600458593869978	0.47400543053068867	1.3984854086473835	2.1489077249578394	0.9888618655708418	39.0	88.0	2.173112140103953	0.012724575278352572	Simulations
1.349226947030059	0.6194867797266577	1.7306520244488084	2.4269969864193777	1.0777700393893186	47.0	80.0	2.251869042300111	0.014639036622046438	Simulations
1.7182615338596952	0.8886970101671363	2.1018173489646657	2.8719251839353497	1.1536636500756545	91.0	136.0	2.4893955736119584	0.009674966895538198	Simulations
1.0158180685136362	0.5533972351185661	1.7133791881851177	2.1728639409335098	1.1570458724198736	64.0	105.0	1.877941050331159	0.008658588349148925	Simulations
0.9723420686864033	1.0549451508909984	2.2876098111223273	2.2887813793023546	1.3164393106159513	84.0	78.0	1.7386151878368417	0.010229982725377326	Simulations
1.097271544369293	0.8073415003975681	2.087397341329355	2.35100226313637	1.2537307187670768	61.0	75.0	1.8752051201619706	0.01209397885454828	Simulations
1.2381126695592928	0.7049836935319305	1.928245567713742	2.453966440914409	1.215853771355116	65.0	99.0	2.0183072164832523	0.010233795867452355	Simulations
1.0841399497107556	0.7412672090536205	1.9761665584484285	2.379431347813142	1.2952913981023866	46.0	68.0	1.8369853697006173	0.012902060830020795	Simulations
1.5197839775986322	0.8369033821656782	1.8442673277024597	2.5365656414614315	1.0167816638627993	70.0	103.0	2.4947004176146375	0.01280452986694395	Simulations
0.6876597972135137	0.5779232855245525	1.593312770579587	1.6893095179997075	1.0016497207861939	52.0	58.0	1.686527218990058	0.013000958660483897	Simulations
1.6921180387758596	0.6757401869418775	1.599069607690372	2.6511434776045206	0.9590254388286611	66.0	128.0	2.76441413362568	0.011460732502826261	Simulations
1.5408602359615284	0.6778316226657275	2.4348298298209103	3.2894729632439406	1.7486127272824121	36.0	71.0	1.8811901068318542	0.012840079580329736	Simulations
1.354193774100437	0.7713308511515431	1.7759676036152154	2.3875784471407253	1.0333846730402882	76.0	120.0	2.310444996359687	0.010068089536450832	Simulations
1.1351991612585004	0.6057732637636501	1.9204194501904404	2.366474193572067	1.2312750323135666	59.0	87.0	1.9219704220960774	0.01083432338071551	Simulations
1.2713197514407224	0.6458889300265678	1.7804409621330746	2.439417957888881	1.1680982064481584	47.0	83.0	2.0883671804500326	0.012799703511206543	Simulations
1.0449121248530928	0.6228869696337422	1.4265818920561404	1.908963025777775	0.8640509009246823	51.0	82.0	2.209317788726171	0.013946353063065721	Simulations
1.1964220267449515	0.9558269715414898	2.548160260121287	2.61276517071947	1.4163431439745187	92.0	95.0	1.8447261045706564	0.00929901713955864	Simulations
0.9509980201624548	0.6139821764211302	1.528001038754976	1.9782903272530539	1.027292307090599	51.0	86.0	1.9257326406500428	0.010993109538654868	Simulations
1.2629749456280015	0.68202101848473	1.9939900472463359	2.515771828907641	1.2527968832796397	57.0	86.0	2.0081242717667984	0.011695913401311772	Simulations
1.2295142315265029	0.6703591830775941	2.0474148011616786	2.538224064803431	1.3087098332769282	76.0	108.0	1.9394857440994964	0.008848834922164008	Simulations
1.2455791349984313	0.7007286702425413	1.7974838475835135	2.298539841215886	1.0529607062174549	83.0	116.0	2.1829303103559474	0.009709190287009443	Simulations
1.1010675854091163	0.756248954088134	1.5965125495605108	1.980924525592728	0.8798569401836115	74.0	98.0	2.251416605498778	0.011947275917798126	Simulations
0.9829195132381288	0.6116523502452553	1.9705125902810265	2.323078762561507	1.3401592493233783	43.0	61.0	1.7334348613676969	0.013010387283340563	Simulations
0.9110501835550291	0.5429698055771848	1.631648365932926	1.9866221133414603	1.0755719297864312	59.0	86.0	1.847037895211648	0.010293179837617033	Simulations
1.234242965145358	0.6785855809037993	2.1722064598111284	2.6672121422118327	1.4329691770664748	45.0	67.0	1.8613185718844685	0.013377985065309489	Simulations
1.3466042731115335	0.7217392600420658	1.6899566498769711	2.3038018893208694	0.9571976162093359	71.0	109.0	2.4068195013317246	0.011625027077158854	Simulations
1.1091208034918234	0.5440619889956373	1.5088045551809037	2.130574708833303	1.0214539053414795	55.0	108.0	2.085825603771162	0.009820542027088586	Simulations
0.8654556819348952	0.6527070809194033	1.613853398816451	1.8527785919773367	0.9873229100424415	77.0	97.0	1.876568013495901	0.009361820407932481	Simulations
1.614655070708612	0.8585359558281771	1.9600802879930639	2.7372247202107873	1.1225696495021753	62.0	98.0	2.4383562493647153	0.013121519615989076	Simulations
1.2122455696269911	0.587757693449682	2.1201634530158957	2.7144428074522517	1.5021972378252606	39.0	68.0	1.8069816260492968	0.01255267406625874	Simulations
1.079322687780041	0.6144854167039535	1.9800761810360241	2.3923981236168084	1.3130754358367673	50.0	72.0	1.8219807166617463	0.012020940140789462	Simulations
0.7136343420846343	0.5510517205123271	1.6964143155938955	1.8823075616149645	1.1686732195303302	48.0	62.0	1.6106363439828215	0.01109081924620387	Simulations
1.0292770533674318	0.7902377277324522	1.4524425810378645	1.7159509331352198	0.6866738797677879	112.0	135.0	2.4989314195488284	0.009787491176102035	Simulations
1.4480020120711785	0.5946367660631355	2.013899953836666	2.9022705586372535	1.454268546566075	47.0	102.0	1.9956909372002212	0.009773414852130666	Simulations
0.8393410812020698	0.6060580402793285	2.009995762416633	2.1748830448333702	1.3355419636313004	51.0	60.0	1.6284647761422077	0.01172520857386117	Simulations
0.8536174691949188	0.7582257287246172	1.8258072029287002	1.9414157923134308	1.087798323118512	66.0	73.0	1.7847203392884068	0.011447918159802251	Simulations
1.1272381969933212	0.6860068915707371	1.6062427472796066	2.110100544645992	0.9828623476526708	63.0	100.0	2.1468932548748634	0.01102250461112325	Simulations
0.9084433260568794	0.4211210375913941	1.5021481841780877	2.0187896946399597	1.1103463685830803	37.0	74.0	1.8181621084744477	0.011655146444079766	Simulations
1.088321752179687	0.4986828228624127	1.73557619217617	2.336335027543505	1.2480132753638178	53.0	99.0	1.8720434098446768	0.009137514032494966	Simulations
0.7979396688894445	0.6466061629756725	1.6406447207686192	1.844580038152971	1.0466403692635264	68.0	83.0	1.7623818957517552	0.009849717831267679	Simulations
1.3716210322627833	0.5957279439547409	1.560887583313065	2.3369069719231734	0.9652859396603902	69.0	123.0	2.420947903525199	0.010370504343565606	Simulations
1.078086560183841	0.6693175797961706	1.7647797090191537	2.1895215981267837	1.1114350379429427	56.0	82.0	1.9699951174646937	0.011929171390706022	Simulations
0.9014127145587276	0.7059855418474519	2.1137585749415395	2.2431090415436223	1.3416963269848947	58.0	65.0	1.6718455558303664	0.011406793510812632	Simulations
1.2294916209702351	0.7324346265837829	1.8750292584980828	2.4036780137010907	1.1741863927308556	54.0	85.0	2.0471008935052923	0.012159790692297542	Simulations
1.2498056751348456	0.5709572141753112	1.627819945510573	2.3167457110842817	1.066940035949436	43.0	79.0	2.1713926116032223	0.01415975448895742	Simulations
1.6712831331380356	0.5873805248047252	2.2407632585018415	3.2725838280416504	1.6013006949036148	36.0	73.0	2.0437034958250817	0.014125834283137214	Simulations
1.3228992440719871	0.645028604926073	1.8858392284244117	2.431418910232633	1.108519666160646	72.0	103.0	2.193392669932365	0.011001593322059699	Simulations
1.4803350610030352	0.621392510979683	1.8774509987218193	2.676032244800475	1.19569718379744	71.0	121.0	2.2380518086541006	0.009605317633419127	Simulations
1.0886640276154613	0.7375833903624986	2.0559077677802198	2.491216470346382	1.4025524427309206	52.0	80.0	1.7762020117377681	0.01035994590256482	Simulations
1.1382286807910664	0.6673319430770475	1.8883700138362922	2.3589863483142683	1.220757667523202	68.0	100.0	1.932395274731652	0.009503902300780591	Simulations
1.2064247698653596	0.5017135209907224	1.5626851236857033	2.2848704419820614	1.0784456721167017	50.0	101.0	2.1186699534872897	0.010724345169375624	Simulations
1.0081384160410969	0.6540522519655472	1.5112006047686943	1.9116384154435118	0.903499999402415	59.0	84.0	2.115814517662303	0.012871585232191117	Simulations
1.0930784137070526	0.7549798146845916	2.1611161139488586	2.398497896560795	1.3054194828537422	61.0	73.0	1.8373388233163974	0.012022160248106603	Simulations
0.9484272042827024	0.6512531236157735	1.709832368954089	2.0586172491519634	1.110190044869261	44.0	66.0	1.8542926579695567	0.013498014523791395	Simulations
1.392099368075361	0.40678541789328326	1.5721500409162517	2.4987151649905086	1.1066157969151476	40.0	89.0	2.2579789407995445	0.013202607087373242	Simulations
1.181525513333411	1.1075917787435232	2.5127233703765097	2.566265330016535	1.384739816683124	82.0	84.0	1.8532473025607992	0.010595897756159059	Simulations
0.9959249444323262	0.6361882231309774	1.717504142419062	2.152114085602815	1.156189141170489	58.0	93.0	1.8613858312352627	0.00963846377083294	Simulations
1.2372588503150925	0.4885708089920848	1.4762495572235397	2.2461769560640468	1.0089181057489542	53.0	110.0	2.2263223776687338	0.010496931945987057	Simulations
0.9728627314213165	0.6369940008041535	1.7698852616396181	2.1521855143297506	1.179322782908434	45.0	70.0	1.8249333817006843	0.01239776857254277	Simulations
0.9041309968796345	0.8121008781524917	2.2406591580535613	2.316152498799634	1.4120215019199993	53.0	56.0	1.640309652261131	0.012749431924602806	Simulations
0.9744483792667618	0.9554609184977221	1.9521831527040343	2.1551320778556127	1.180683698588851	68.0	68.0	1.825325513032338	0.01276696713092618	Simulations
1.2354253953579253	0.684625660286063	1.5128874835658372	2.0869647086135656	0.8515393132556403	63.0	102.0	2.4508142796538612	0.01267903100299879	Simulations
1.1669764882867608	0.5374640374184844	1.564062669349633	2.1962818655468794	1.0293053772601186	48.0	90.0	2.133751473632738	0.012148801662464502	Simulations
0.8324648230142424	0.6793997492019743	1.6265288957373658	1.8654296729609805	1.032964849946738	69.0	89.0	1.8058984998929692	0.009581087738839193	Simulations
1.322767048768769	0.5778267383758104	1.4878516817518699	2.2484554624840154	0.9256884137152463	68.0	122.0	2.428954958461508	0.010494555225248201	Simulations
0.6521065110866489	0.8355560201092158	1.8568286400461933	1.6701977202893106	1.0180912092026617	93.0	76.0	1.640518752339841	0.009396737960782046	Simulations
0.860428585551728	0.7550336691343666	1.9926813186187144	2.141001558458523	1.2805729729067952	63.0	73.0	1.6719090623930832	0.010157484647062091	Simulations
1.1936907700534019	0.7681673405868903	2.0627175948951066	2.48034297993458	1.2866522098811781	63.0	90.0	1.927749364502812	0.010521305471006197	Simulations
1.0414441740721252	0.7200141714318831	1.9774146320754216	2.323231798359755	1.2817876242876298	59.0	80.0	1.8124935475570076	0.010724698239618264	Simulations
1.3791420519627295	0.7191600982881754	1.8755021404724943	2.5508982692015088	1.1717562172387792	68.0	118.0	2.1769871852804425	0.009511295891553424	Simulations
0.8980421892440296	0.7052544845797462	1.68161963814797	1.9082453273407975	1.010203138096768	66.0	82.0	1.8889718863237244	0.011190258904555132	Simulations
1.0478941596328313	0.563922262152178	1.376313338302639	1.9206403235873246	0.8727461639544934	49.0	84.0	2.200686067624435	0.013547063767908646	Simulations
0.8868349210502922	0.5899669771893232	1.5534588309726731	1.8822220543453432	0.995387133295051	47.0	68.0	1.890944730332794	0.013516282293347044	Simulations
1.1097579568350402	0.5162343823548312	1.6222693225828153	2.2442716352708136	1.1345136784357734	47.0	83.0	1.9781794419306908	0.011857509636492432	Simulations
1.2876639553353948	0.7272975634581869	1.825841109653847	2.357987977708118	1.0703240223727233	70.0	100.0	2.203059941120322	0.011395087485933075	Simulations
1.2999573938244688	0.7750681351227608	2.218005281603043	2.771207789278592	1.471250395454123	43.0	69.0	1.8835731822680108	0.013238725902186018	Simulations
1.050943621285899	0.6989811285786436	1.8783759768623276	2.2377754649315325	1.1868318436456335	57.0	79.0	1.8855033903182763	0.01158164233655384	Simulations
1.094998672344553	0.6744981059973205	2.1094059191267087	2.5362781185043284	1.4412794461597753	39.0	59.0	1.7597407118113897	0.01381970968274987	Simulations
1.0079101888306805	0.5514389184364026	1.7599590102040614	2.1814455682212226	1.173535379390542	46.0	67.0	1.8588664700966437	0.013349599094844114	Simulations
1.4549751064078358	0.6674370988041869	1.8903804015282	2.636836850813468	1.181861744405632	62.0	102.0	2.231087403662054	0.011350461105814615	Simulations
1.2761087022438198	0.7206985175914766	1.6702334958572544	2.2676515915881805	0.9915428893443609	76.0	119.0	2.2869929439841203	0.010029007686023966	Simulations
0.6907491757114734	0.7347291879552511	1.8897711566377442	1.8165297144239778	1.1257805387125044	64.0	60.0	1.6135735624826546	0.011504322524843572	Simulations
1.0405603166700055	0.6738704221432628	1.9637936853218578	2.3351809168295112	1.2946206001595058	50.0	71.0	1.8037569590208913	0.011985985362618185	Simulations
0.9840846725579531	0.5766503225190687	1.7406648818173174	2.11679024747684	1.1327055749188868	54.0	76.0	1.8687912325569895	0.011869808038628374	Simulations
0.9312751779567874	0.5776613567022997	1.6429483270769414	2.0534459971210097	1.1221708191642223	61.0	95.0	1.8298871812139872	0.009176365307170574	Simulations
1.1365314442323908	0.6684034119014861	1.865907543277518	2.3353372963487473	1.1988058521163565	61.0	90.0	1.948052966396496	0.010689254488554503	Simulations
0.9145207325589149	0.4434159579163116	1.204433710831049	1.6987551712332263	0.7842344386743114	64.0	112.0	2.1661318190831333	0.00995643785933776	Simulations
0.8267883492802295	0.4527715156739134	1.7808555267030484	2.162814846613214	1.3360264973329847	36.0	58.0	1.6188412811652229	0.011982095585303753	Simulations
1.2608900838808188	0.9013431978788571	1.9145544613656504	2.35584455911414	1.0949544752333213	62.0	88.0	2.1515456691586547	0.01256106208588751	Simulations
0.5997655920752774	0.5112627097892188	1.5874961608656872	1.7376123471907086	1.1378467551154312	36.0	45.0	1.527105771826394	0.013573333130821912	Simulations
1.0183451353472572	0.6440597815332982	1.7586642411852362	2.1135524317274452	1.095207296380188	71.0	98.0	1.929819531620205	0.009678223869367023	Simulations
1.4761586176842225	0.7254648140629172	1.8697670442439775	2.4927014479773173	1.0165428302930948	84.0	118.0	2.4521361753725706	0.010966433042061572	Simulations
0.8616797618157646	0.7159480724437106	1.9825424616022898	2.1514444144647715	1.289764652649007	68.0	80.0	1.6680906939463627	0.009227471626490926	Simulations
1.0082691154574959	0.9538574083538491	2.065201711761228	2.275558664116763	1.2672895486592672	57.0	68.0	1.795610692539994	0.012418744005620394	Simulations
1.1829023959546092	0.6744301893436906	2.0503513844488928	2.5555062511612125	1.3726038552066033	52.0	79.0	1.8617944583701898	0.011350554538305172	Simulations
1.4104796191509883	0.6903991078889671	1.5519162345756234	2.367927695666992	0.9574480765160035	57.0	110.0	2.473165651220996	0.011875989762299498	Simulations
1.0544651607221078	0.5686856915291014	1.4623708221595766	1.9946399439954519	0.940174783273344	60.0	101.0	2.121562904559987	0.010743836191290037	Simulations
1.2799133224665242	0.6003743816100551	1.8570902979416615	2.516434575865809	1.2365212533992849	51.0	87.0	2.035092052763308	0.011782690264349641	Simulations
1.271213111242262	0.6387295158774138	1.6579939117548943	2.3490474969765294	1.0778343857342674	59.0	102.0	2.179414136408588	0.011019023197571136	Simulations
1.133123538555327	0.5059869291456693	1.926695738069717	2.6188329674962465	1.4857094289409194	35.0	83.0	1.7626817979899803	0.00985267542952516	Simulations
1.1754882136878602	0.3883177952405059	1.4916339608674678	2.279671592238319	1.1041833785504587	47.0	110.0	2.0645769865065424	0.00950769287744202	Simulations
1.8253911373192402	0.6115540497360097	1.9035671697316974	3.02009848142785	1.1947073441086098	63.0	119.0	2.5278981470405153	0.011243179296239015	Simulations
1.323908174999226	0.8659835243675036	2.1898798424185064	2.646537032678965	1.3226288576797387	75.0	102.0	2.000967253445333	0.009810760364797761	Simulations
1.2633319428906529	0.6904715445101426	2.3416247843662616	2.9013313976134776	1.6379994547228247	45.0	71.0	1.7712651791477114	0.011616622769130211	Simulations
1.2546305304132919	0.4586670620782458	1.6302163594259849	2.464927613880119	1.2102970834668272	40.0	99.0	2.036630218771968	0.01036549556392114	Simulations
0.7329078070350812	0.6625723084574915	1.5923779461963237	1.733626824840039	1.0007190178049579	51.0	60.0	1.7323812119037059	0.013212607187062799	Simulations
1.2066901430828536	0.6628869568128388	1.6208025068372325	2.1847307418522512	0.9780405987693978	50.0	78.0	2.233783285275836	0.014865246497606626	Simulations
1.0726279057126404	0.67966059102864	1.590812371683861	2.0888283412603363	1.016200435547696	44.0	75.0	2.05552789409555	0.01386011933086529	Simulations
0.6787672716693705	0.6787672716693702	1.946847778147089	1.8306272111515534	1.151859939482183	35.0	34.0	1.5892793458677879	0.019658021408292786	Simulations
1.3473903222110255	0.7614307789510144	1.9021244161779542	2.432072104667713	1.0846817824566874	81.0	116.0	2.24219872040197	0.010042363329504917	Simulations
0.8301861750794295	0.7581726639984883	1.7497024770595322	1.8287059252748539	0.9985197501954244	73.0	78.0	1.831416879753205	0.01119179775284054	Simulations
1.1050408673265895	0.7356944740878285	1.7204667106691574	2.0973088589522013	0.9922679916256119	90.0	123.0	2.1136516310641285	0.008778354580902202	Simulations
0.7646293140699263	0.9299004613949051	2.530832797212252	2.2086202878737686	1.4439909738038423	63.0	53.0	1.5295249956138552	0.011567616673979085	Simulations
1.3581704625619007	0.6058495698294539	2.1724633157738547	2.8692148186312143	1.5110443560693136	42.0	75.0	1.8988289834819378	0.012334799682133591	Simulations
1.1574190396985016	0.6760909016159373	2.1887042441452813	2.635316328492029	1.4778972887935276	49.0	76.0	1.7831525563209834	0.01097934390748457	Simulations
1.4453426679846137	0.8295722584940304	2.4527319046922784	2.947906837787025	1.502564169802411	82.0	110.0	1.961917432234976	0.0088387666060765	Simulations
0.99216174815459	0.6362145268243502	1.543332030135165	1.9397822146223949	0.9476204664678048	58.0	84.0	2.047003292207069	0.01230373122211728	Simulations
1.4787974805350779	0.7886782146493285	2.0452634846419158	2.7000614384625283	1.2212639579274505	73.0	118.0	2.2108745786985113	0.009700145630835762	Simulations
1.435254181140026	0.6716895267971957	1.6883268744702555	2.404971652662454	0.9697174715224282	51.0	84.0	2.480074581812699	0.015599803649729075	Simulations
1.5850101842466677	0.6779510235976558	1.4774896806544895	2.3925406018078896	0.8075304175612219	74.0	128.0	2.962786973441161	0.012241835149964285	Simulations
1.507000837447878	0.5767181841480289	1.5288820612408522	2.5242458175571714	1.0172449801092933	62.0	139.0	2.4814532063711585	0.009432987406387249	Simulations
1.1009555585989594	0.7951295679006023	2.0053891750200727	2.3401888246601845	1.239233266061225	62.0	81.0	1.8884167240750669	0.011323174874251923	Simulations
1.2051005025965458	0.6541918123286321	1.5538645264425652	2.1521383273350403	0.9470378247384945	58.0	95.0	2.272494583761013	0.012466072167576205	Simulations
1.358383963335458	0.7135067932106047	2.1932994539547157	2.8417786523274486	1.4833946889919907	53.0	86.0	1.9157265921307287	0.010905717183904843	Simulations
0.7479797276490545	0.7643920993642723	1.8757103054745559	1.9188601572066712	1.1708804295576167	60.0	58.0	1.6388181993371065	0.012287169299620846	Simulations
0.9980647029707785	0.7642194680462391	2.1812184009297373	2.408222291374842	1.4101575884040634	50.0	61.0	1.7077682034816632	0.01265757656205627	Simulations
2.036473666320917	0.5649052174248377	2.0519128464477863	3.4636681963609206	1.4271945300400035	46.0	115.0	2.4269068605972275	0.011122771670052527	Simulations
1.647000661968006	0.6261361579349363	2.047951147424566	2.927688067881006	1.280687405913	73.0	120.0	2.286028623662354	0.009940362231984414	Simulations
0.7654582813336825	0.7286950914462453	1.8564744585103048	1.9134085357325927	1.1479502543989102	61.0	64.0	1.666804400626656	0.011516950220323549	Simulations
0.7470626145921521	0.5697955780717701	1.5450045213373518	1.7186980956352713	0.9716354810431193	58.0	70.0	1.768871278547926	0.01175470094811312	Simulations
0.3493491761847065	0.5904003395970872	1.580337041287372	1.4529888653741099	1.1036396891894034	68.0	43.0	1.3165427807705021	0.00922684656293837	Simulations
0.9430874435619647	0.5991949706344426	2.07904131070738	2.4439683506683694	1.5008809071064046	39.0	57.0	1.6283559468953286	0.012340633277792099	Simulations
1.1552827056346395	0.8211301841305962	1.8548508301056834	2.2707824524113462	1.1154997467767067	53.0	75.0	2.0356637990935345	0.013673324162453834	Simulations
1.318469388237922	0.532007496324646	1.7597245201121487	2.5409449343029205	1.2224755460649985	50.0	103.0	2.078524141020175	0.010248150526623437	Simulations
1.1415079518373465	0.5082602217897589	1.8834535398505816	2.532559465808419	1.3910515139710724	42.0	83.0	1.8206079648183933	0.010414702377434994	Simulations
0.5979199503366386	0.7183097694604046	1.972812907452918	1.8406581790849625	1.242738228748324	73.0	62.0	1.4811310511778968	0.009140311235739544	Simulations
1.441785490485971	0.6336077216176399	1.9645332276909087	2.6991552561760894	1.2573697656901184	74.0	123.0	2.1466678536640607	0.008960154352483212	Simulations
1.3340452200784239	0.7573961648982417	1.7445584665549168	2.2674141159516505	0.9333688958732267	65.0	97.0	2.429279704923463	0.01320132587684229	Simulations
1.0485499379691048	0.9008797162565452	2.1780347429233435	2.362653085790272	1.3141031478211673	57.0	66.0	1.7979205739729338	0.012823171043804317	Simulations
1.3680182663477898	0.9051789570709143	2.484366827251049	2.7325104548776404	1.3644921885298507	66.0	76.0	2.002584168562913	0.013182406320329803	Simulations
1.570988088579608	0.706634310528045	1.788174692952791	2.7569977312204643	1.1860096426408564	52.0	116.0	2.324599760488903	0.010491227074337925	Simulations
1.2925897817739498	0.5550849362449684	2.05867884184177	2.8268747989266094	1.5342850171526596	34.0	73.0	1.8424704454018261	0.012077280515109695	Simulations
1.080158398194459	0.7778075207120017	1.8927813186424953	2.223268005950662	1.1431096077562033	70.0	90.0	1.9449298570018052	0.01066353473353843	Simulations
0.7046583254351844	0.7148741120745079	1.5929120544336832	1.6648396884875016	0.9601813630523173	67.0	72.0	1.7338804444143223	0.011027839227745907	Simulations
0.5872352781091585	0.544108779931161	1.6737913588128812	1.7396067286929788	1.1523714505838203	36.0	39.0	1.5095885339849842	0.015234753081134747	Simulations
0.3081417775837445	0.8033363661686739	2.5680816769849266	1.6144045090000265	1.306262731416282	44.0	19.0	1.2358957123806553	0.016081947924907095	Simulations
1.1972288749149893	0.5722821402375877	1.7104404285424966	2.3574148215019566	1.1601859465869673	50.0	96.0	2.031928440813298	0.010654683281998593	Simulations
1.0962991465643945	0.5299554879348485	1.4703070589099745	2.095283126956117	0.9989839803917224	50.0	101.0	2.097414140849899	0.01058031439721823	Simulations
0.9853795031055188	0.5495305648924016	1.7425848143095137	2.1900914001952856	1.2047118970897668	46.0	73.0	1.8179378866315745	0.011812368601426895	Simulations
1.2568153991148898	0.6652225813725794	1.7929510500384775	2.3750443664734884	1.1182289673585986	61.0	98.0	2.1239338595240027	0.011089171842035232	Simulations
1.2107734465613058	0.698796051142828	1.805355208989429	2.2784389632026114	1.0676655166413056	68.0	96.0	2.1340381680305582	0.011391520619857105	Simulations
1.022083403961136	1.0421418037962311	2.2247245722315667	2.1109192783504436	1.0888358743893076	72.0	70.0	1.9386937260258705	0.013644070073197326	Simulations
1.0802915242355549	0.5120260625650771	1.4930609570001356	2.0740046766233893	0.9937131523878345	56.0	105.0	2.087126120490282	0.010109693162420648	Simulations
1.0179080571602401	0.8287402331378297	2.006879128073192	2.1523205356431125	1.1344124784828724	81.0	90.0	1.8972997709982513	0.010266084897515772	Simulations
1.0061149653764958	0.8061863646274774	1.7767071160405077	2.030874519467723	1.024759554091227	67.0	83.0	1.9818058893519996	0.011889345334151875	Simulations
0.7310187085727686	0.48812212245340336	1.888819348951887	2.1274090117362245	1.396390303163456	36.0	49.0	1.5235060046726767	0.01239582012660954	Simulations
1.014340133744271	0.5746676226205365	1.8098415893104176	2.2264813423901426	1.2121412086458716	74.0	109.0	1.836816805261021	0.008047777491555422	Simulations
0.8198180867581367	0.9541954639869511	1.678905365107348	1.7986588442317273	0.9788407574735906	86.0	76.0	1.837539794393222	0.01154967754982732	Simulations
0.9692337166123075	0.719788450944445	2.242050045736544	2.4222279097506956	1.452994193138388	63.0	73.0	1.6670595940365154	0.010100077790410564	Simulations
1.5565099804040095	0.9372077818855131	2.27099173751405	2.7858705452330033	1.2293605648289938	73.0	96.0	2.266113477961222	0.01229395945212636	Simulations
0.7920911132682031	0.6201939144098176	1.8156298089788236	1.987346413299324	1.1952553000311208	55.0	66.0	1.6626961731502714	0.011114008590612411	Simulations
1.1343848192365271	0.6678141956245547	1.889298018932479	2.4067519991220667	1.2723671798855396	40.0	66.0	1.8915546055962986	0.01393291552817972	Simulations
1.1230059661194567	0.7240637321019492	1.9611525762659097	2.3588902052745917	1.235884239155135	73.0	97.0	1.9086659822502121	0.00961406858030225	Simulations
1.4631713255571936	0.681146425998481	1.4385032879145347	2.2425546851347877	0.7793833595775942	78.0	134.0	2.8773448362436103	0.011378642773529016	Simulations
1.0814494798426935	0.718616027440246	1.7277676608769985	2.1273361475113646	1.045886667668671	74.0	104.0	2.0340025485297497	0.009849245065768465	Simulations
0.7931397895003208	0.73476888165436	1.713005928909334	1.7678882612268003	0.9747484717264795	69.0	72.0	1.8136866201959851	0.011929516663569688	Simulations
1.2254240796370497	0.706457557860669	1.6510613105253518	2.151036604950046	0.9256125253129962	67.0	100.0	2.3239061120339444	0.012165517836997661	Simulations
1.0591441876020193	0.6861296059006401	1.6303933992996489	2.1039435980825445	1.0447994104805252	54.0	86.0	2.0137296948845873	0.01174267490493843	Simulations
0.8704071336851795	0.6892824553453742	1.8534501499967078	2.0137379594170155	1.143330825731836	64.0	74.0	1.7612907078999114	0.011035581773857222	Simulations
0.8866463794766997	0.6458424558443985	1.827170370859718	2.114367252301326	1.2277208728246265	43.0	60.0	1.7221888941553838	0.013070723165938464	Simulations
0.7561760209326598	0.5618678987160177	2.084443269479392	2.2262287998849772	1.4700527789523175	51.0	60.0	1.5143869878410583	0.009978898667527054	Simulations
1.0630839500539393	0.5989664826676486	1.5276593587995262	1.9552417451953696	0.8921577951414305	68.0	96.0	2.191587358024947	0.011791418611704406	Simulations
0.6795809685800487	0.7589555226962375	2.0714287903219275	1.9100674006904526	1.2304864321104039	60.0	54.0	1.5522864379857495	0.011748051806641006	Simulations
0.8336341198624787	0.5519921206339589	1.2778743443004392	1.6208469446880913	0.7872128248256126	63.0	93.0	2.058969180344781	0.011203464894285538	Simulations
0.8084358914234953	0.6170395460849547	1.604965359342894	1.811416561808337	1.0029806703848418	64.0	79.0	1.8060333716235029	0.010795247480701622	Simulations
0.9756987107355192	0.5361070849771191	1.4229281912865102	1.869412744417823	0.8937140336823038	51.0	79.0	2.091734798787281	0.013477214565359307	Simulations
1.0676850168629128	0.6801868082305267	1.9397165881132936	2.2872861829619686	1.2196011660990558	72.0	94.0	1.875437845207993	0.009651355858915677	Simulations
1.165885577928199	0.7543605325225406	1.704251592555038	2.1416043896660146	0.9757188117378158	75.0	105.0	2.1948991491223624	0.010801472881531474	Simulations
0.6680402738884079	0.7177114346681954	1.8555901298360216	1.880282582394179	1.212242308505771	63.0	64.0	1.5510781707593138	0.009894865573531163	Simulations
0.879663738612771	0.5853488150655275	1.6227869239440746	1.9132567333662927	1.0335929947535216	56.0	77.0	1.8510736267350014	0.011537172464472473	Simulations
1.3958293199146636	0.6573954691191397	1.8002388046385354	2.568560330474448	1.1727310105597843	66.0	117.0	2.1902382620959147	0.009667417264827822	Simulations
1.3085703198573353	0.7421268178949141	1.6176880607704438	2.174551103380399	0.8659807835230638	82.0	124.0	2.511084708524001	0.010712183040892422	Simulations
0.8508977933889217	0.6493882521281085	2.1626555702946306	2.249466727569677	1.3985689341807552	65.0	70.0	1.6084060446311537	0.009794738044649236	Simulations
0.9559231748580328	0.6435994944433976	2.00118044216138	2.341975550676504	1.3860523758184713	52.0	73.0	1.6896731981672446	0.010366359452239205	Simulations
1.6271319823803378	0.6276184791223993	2.168786075134356	3.067402841431526	1.4402708590511883	72.0	140.0	2.1297402652805517	0.007790553541316372	Simulations
0.8775861597677345	0.7031791677921466	1.7112364675376281	1.869501349999537	0.9919151902318025	85.0	98.0	1.8847391071434743	0.00933025340716921	Simulations
1.0845356284992689	0.5622433681858674	1.7540209506650297	2.3152110919264515	1.2306754634271826	45.0	83.0	1.8812523372157401	0.010984257520936973	Simulations
0.9002276867117021	0.6249329612294205	2.0912376986922143	2.408135760554102	1.5079080738424	34.0	49.0	1.5970043547931756	0.013783025444268432	Simulations
1.0043669894440503	0.46739326501630485	1.4896660116145	2.002649189750245	0.998282200306195	56.0	98.0	2.0060952595728834	0.010248878714806007	Simulations
0.9488754775119477	0.7527198302775626	2.004362069088685	2.1886982192155693	1.2398227417036216	61.0	71.0	1.765331563613773	0.011548439086529905	Simulations
1.2131574357303028	0.680290315230544	2.110436806153801	2.6469455129140833	1.4337880771837805	49.0	77.0	1.8461204658035404	0.011486970090154557	Simulations
0.9906087703974544	0.8821299040483304	2.0290468534160713	2.1535973233744587	1.1629885529770043	72.0	79.0	1.8517786076756353	0.011252045888829037	Simulations
0.8622859635529481	0.5643315530969018	1.5434063694259046	1.8919856145811211	1.029699651028173	46.0	71.0	1.8374150294136165	0.012361655416715536	Simulations
1.2072540486419965	0.6508041275317173	1.7861038007493786	2.3538393364442007	1.1465852878022043	63.0	100.0	2.05291255825904	0.010376721786142379	Simulations
1.0303636221522703	0.5722206269056649	1.5604236200254455	2.020850542638499	0.9904869204862286	53.0	82.0	2.040259695349098	0.01254576582871969	Simulations
1.3224255569303243	1.007807563854855	2.079545697651019	2.3483781504532697	1.0259525935229454	107.0	125.0	2.288973355376335	0.009557605355258342	Simulations
1.115474143356312	0.8878781666883404	2.1506140239255354	2.326544631129703	1.2110704877733909	78.0	88.0	1.9210645908869952	0.010703477576732009	Simulations
1.3564032780773718	0.7070424572496918	2.192501901966067	2.8222421029361215	1.4658388248587497	52.0	84.0	1.9253427150888003	0.011251372279102398	Simulations
1.014629560922818	0.7843310270004398	2.169346658392812	2.375115858547504	1.3604862976246859	54.0	64.0	1.7457844762525652	0.012560554121233466	Simulations
0.8776784896675349	0.6596117944790447	1.6371291818143314	1.881465423934657	1.0037869342671222	55.0	70.0	1.874367318108538	0.012948624348239266	Simulations
0.6556669575332685	0.5018430381980881	1.4023590109140864	1.6203809559860258	0.9647139984527573	46.0	64.0	1.6796490551446859	0.01168999732286458	Simulations
1.117117434218538	1.0664086880211996	1.9786796183330364	2.0633687254160633	0.9462512911975254	103.0	108.0	2.180571635262736	0.010413948018847501	Simulations
1.1102239467321964	0.6353891712606428	1.878252963989334	2.366187133369467	1.2559631866372707	48.0	76.0	1.883962172255002	0.012023289442389572	Simulations
1.0861925189855153	0.6611626644893513	1.7933707465989719	2.217398987727118	1.1312064687416028	59.0	87.0	1.9602071319427985	0.011160989766274495	Simulations
1.2532536302559532	0.851455644818213	1.665290117555292	2.197403141898997	0.9441495116430438	63.0	100.0	2.3273889514331207	0.01218712332966123	Simulations
1.1903060437923523	0.5883205210460571	1.7087821998538615	2.3098829221203645	1.1195768783280122	57.0	97.0	2.063174907264937	0.010771815793900892	Simulations
1.2340632088333376	0.5561817485721889	1.6373505286497254	2.333245569073251	1.0991823602399133	48.0	93.0	2.1227101648210445	0.011676423643903904	Simulations
1.3487810945943315	0.6689856660823623	2.3911872529621414	2.962491901552293	1.6137108069579613	51.0	77.0	1.8358257804178344	0.011382196801452804	Simulations
1.5772644461071024	0.7803971449793581	1.9598109779299173	2.6859660808270007	1.1087016347198984	80.0	124.0	2.4226230003760945	0.010294918672530864	Simulations
1.1622087208476264	0.6398293179271535	1.8742275816125429	2.411742470294589	1.2495337494469625	51.0	85.0	1.9301139095778839	0.011161011689093999	Simulations
1.144969705649148	0.569278218063862	2.030804522715015	2.6439082103057	1.4989385046565522	37.0	73.0	1.7638536885217262	0.011215491704881543	Simulations
1.2604382538545076	0.8629079927690024	2.1897302068800206	2.5874576176867836	1.327019363832276	54.0	72.0	1.9498265723979415	0.013379802902298697	Simulations
1.4032673318301307	0.5479246452345388	1.9061881397424683	2.7441115419168662	1.3408442100867355	47.0	97.0	2.046555089154882	0.010651520636682586	Simulations
1.2431487732289441	0.7644079611919745	1.6663165966271094	2.1779597215410056	0.9348109483120615	79.0	117.0	2.329839766504267	0.010429322544479796	Simulations
1.1538248439312988	0.5038118419226686	1.541670665597948	2.1477105863848696	0.9938857424535706	60.0	101.0	2.160923026305712	0.011006412705310551	Simulations
1.3044277498903196	0.7481623394825485	1.4904823435021284	2.2127372770085643	0.9083095271182445	47.0	89.0	2.4361048859950007	0.014433441005840701	Simulations
1.1412592766801866	0.5306776199516745	1.6354560757850762	2.2203619965123287	1.0791027198321421	45.0	78.0	2.057600222579101	0.013345675690266385	Simulations
1.5905467390421357	0.7218028977210484	2.1145550244768	2.80423738950499	1.2136906504628544	80.0	116.0	2.3105042363435553	0.010415583919909339	Simulations
0.929837883272687	0.7448786888857799	1.7804719526564956	1.9259858956164468	0.9961480123437598	62.0	70.0	1.9334334574286236	0.013588073033490205	Simulations
0.9505990517091786	0.9333347799714768	1.8985265383712542	1.948777750996423	0.9981786992872445	71.0	73.0	1.952333537459735	0.013221911569416257	Simulations
1.9708144266922476	0.70182563541596	1.9097556606955952	3.1789305312961913	1.2081161046039437	56.0	120.0	2.6313121058330227	0.01163151983290892	Simulations
0.7545912809546116	0.6027319076665212	2.0248987297720653	2.1005879834369434	1.3459967024823318	67.0	72.0	1.5606189670175041	0.008918310264551099	Simulations
0.7422858857372683	0.8586213339964124	1.9066840457460457	1.8379147357625512	1.0956288500252829	67.0	59.0	1.6774975720291951	0.012649333530573974	Simulations
1.3562958830880711	0.8723491247498898	2.0393641585950264	2.4827066164405602	1.126410733352489	77.0	102.0	2.204086433952369	0.011178243144750072	Simulations
0.8017965231001742	0.8713087194133711	2.2483590454558358	1.998041016838549	1.1962444937383747	65.0	60.0	1.6702614116905867	0.012334565262906166	Simulations
1.2818340088213138	0.6721809237972437	1.6229722600884748	2.2055283346125982	0.9236943257912845	62.0	91.0	2.387725325391848	0.013798207517994506	Simulations
1.1169370940669587	0.5243398764100256	1.690464927156642	2.275816030830127	1.1588789367631684	48.0	82.0	1.963808262135339	0.011873830218740361	Simulations
0.8327646675387512	0.6069892416985359	1.6803460185801005	1.954671757455587	1.1219070899168357	53.0	75.0	1.7422759647596862	0.010679642069312444	Simulations
0.6526937442242713	0.535055371906648	1.6392158806586206	1.7547805327646708	1.1020867885403995	43.0	50.0	1.5922344329058666	0.013421055339376306	Simulations
1.5211004614668273	0.693280967977981	2.1727989011970403	2.902351545605834	1.3812510841390069	69.0	111.0	2.1012483385053735	0.009650870979253452	Simulations
0.7887294173187023	0.7894481919094918	2.0345425004558635	2.0732307355150965	1.2845013181963942	71.0	73.0	1.6140355063443457	0.009461264603802328	Simulations
1.1024294821914502	0.6018408844524139	1.8812918810700956	2.3704551587347273	1.2680256765432771	50.0	76.0	1.8694062766905057	0.011876054513293767	Simulations
0.7129782957543853	0.7129782957543853	2.196628863237539	2.0934955845853027	1.3805172888309174	39.0	38.0	1.5164573464763824	0.015808024203361176	Simulations
0.6004709002991322	0.5256766036328517	1.4246985172975706	1.5506997589489506	0.9502288586498184	41.0	49.0	1.631922399360026	0.0144198460485286	Simulations
1.139003345036272	0.7332722195179115	1.9150857839080933	2.28735356315466	1.1483502181183882	72.0	95.0	1.9918606075614882	0.01046438620702022	Simulations
0.8427623496837275	0.73812439268728	1.8066281636767396	1.9069867081272447	1.0642243584435171	66.0	72.0	1.7919028943448643	0.011687395248711796	Simulations
1.6016609438382363	0.6382128305970429	1.7389059959059194	2.766886797425574	1.1652258535873377	51.0	114.0	2.3745497826942836	0.010944333357646063	Simulations
1.3810186971924718	0.6630105974408464	2.0187931897733256	2.8305173956644367	1.4494986984719649	49.0	108.0	1.9527560794972196	0.008939923631065114	Simulations
1.3878089454390479	0.8600871101678875	2.0299307263613584	2.56059579632206	1.1727868508830122	61.0	86.0	2.1833428592707547	0.01309928721429539	Simulations
0.745922515715985	0.608896434167882	1.8599046517589082	1.9896398491061946	1.2437173333902096	44.0	51.0	1.5997524483177368	0.01329115047750696	Simulations
1.5036054048147578	0.791338580696284	1.8712062780753018	2.5487762846443305	1.0451708798295727	71.0	106.0	2.438621601340384	0.01213269730042111	Simulations
1.3975658664424	0.6303689228897118	1.9441194397516435	2.7103433643744212	1.3127774979320213	54.0	100.0	2.064587006285485	0.010458532181709746	Simulations
1.237067362753343	0.7213572225368672	1.9202589660010332	2.4146911369474946	1.1776237741941515	59.0	82.0	2.050477571752378	0.012633658091047195	Simulations
1.197489745227199	0.6417641582827296	1.7591018626348693	2.2462990263514753	1.0488092811242762	66.0	95.0	2.141761201753997	0.011566290884556202	Simulations
1.2974422844015483	0.5733896181504178	1.3480442668780424	2.1564677319259373	0.8590254475243889	57.0	119.0	2.510365365939537	0.011158801290134957	Simulations
0.980635547148069	0.788143064377893	2.107591555913114	2.3390314356395145	1.3583958884914455	47.0	59.0	1.7219070342130562	0.013288258537460537	Simulations
0.7289155796918847	0.8009509024710171	2.1142345361500814	1.758585379646514	1.0296697999546294	44.0	40.0	1.707911973065543	0.019305840484989362	Simulations
1.3162443085359374	0.8198113959503965	1.5929182406672682	2.067873643418291	0.7516293348823536	106.0	142.0	2.751188049016153	0.010282075732510792	Simulations
1.3511232951384642	0.8684741238769322	1.7914302324448343	2.2794114926411884	0.9282881975027242	88.0	119.0	2.455499810051715	0.01089089673051876	Simulations
1.3455030149840228	0.9420642807141432	1.9815903016801748	2.307625976944616	0.9621229619605934	78.0	95.0	2.3984730311832343	0.013285433870898722	Simulations
1.081734027579698	0.7429161096479828	1.961401245748484	2.2318774891221236	1.1501434615424255	99.0	121.0	1.9405209556458414	0.007904495973896883	Simulations
1.3145268262288055	0.7379481045392888	1.8919444380727481	2.5513333002411236	1.2368064740123181	55.0	100.0	2.062839541876228	0.01044631605450031	Simulations
0.8336221189925181	0.5425172858547573	1.728084895077306	2.0322890603054757	1.1986669413129576	55.0	78.0	1.695457670734968	0.009765061103713352	Simulations
1.5550363007946175	0.5542216581211559	1.2635756945363195	2.2612741609668796	0.7062378601722622	83.0	159.0	3.201859158917536	0.010559181440351723	Simulations
1.523291742938893	0.5015249460610989	1.6645975110078388	2.6455083316181134	1.1222165886792204	55.0	119.0	2.3573954959369416	0.0103965866992073	Simulations
1.10955411368853	1.0460350346952305	1.669590892446512	1.8159728739138206	0.7064187602252905	84.0	92.0	2.5706747557704612	0.014805946636530024	Simulations
1.0251147060374692	0.6799828200703097	1.8645929909143524	2.1752521207343922	1.150137414696923	55.0	72.0	1.8912975901297855	0.01276911645809558	Simulations
1.5507633420869298	0.8016318856201933	1.6425409480349509	2.331350033108366	0.7805866910214362	101.0	147.0	2.986663825971308	0.01073833237671273	Simulations
1.003045901904483	0.8608830602542301	1.9266617544329816	2.109319931484311	1.1062740295798281	71.0	82.0	1.9066884651404572	0.01135450170954875	Simulations
1.4214717937788932	0.6449983627061191	1.8321478777128306	2.5527829278181207	1.1313111340392275	67.0	109.0	2.2564817502535113	0.010771331289114838	Simulations
0.9020898409631977	0.46486869257317576	1.6813740176770757	2.1665316112157913	1.2644417702525936	34.0	64.0	1.71342932682696	0.012138854481034163	Simulations
1.3136760926699456	0.5886833553216941	1.9329940511557027	2.635528312207959	1.3218522195380134	41.0	74.0	1.993814643764849	0.013453125606975312	Simulations
1.0877708002670516	0.6748043951485527	1.8824580787658838	2.302439400520332	1.2146686002532805	56.0	82.0	1.8955288710354674	0.011251224762720812	Simulations
0.7255013487242274	0.8323272586496602	2.1549110200773245	2.028017922256362	1.3025165735321347	78.0	69.0	1.5569997061586935	0.009257516987645842	Simulations
1.1188291298955562	0.9652679571693072	1.7701575048562646	2.0365751635317086	0.9177460336361525	96.0	114.0	2.219105383068454	0.010087527906043435	Simulations
1.1418400305075993	0.7214217298764922	1.9213297269686131	2.4017479673001128	1.2599079367925134	56.0	84.0	1.9062884653417673	0.011080552961293873	Simulations
0.8782098711840438	0.6494990690684097	1.8279789027227433	2.115583249512611	1.2373733783285672	53.0	71.0	1.7097371630625526	0.01089823320359753	Simulations
1.0163577198214973	0.5873197932443082	1.5888950220280413	2.019353345219146	1.0029956253976486	67.0	97.0	2.0133221861446815	0.010408021248060065	Simulations
1.0604699951101384	0.7167117794526685	2.1392665115954617	2.3902568625402463	1.3297868674301079	79.0	95.0	1.797473656180377	0.008904953964676872	Simulations
0.8527635213341489	0.6913971651772965	1.7545697877981001	1.9662899922346184	1.1135264709004695	66.0	82.0	1.765822406219539	0.010004149443167312	Simulations
1.6455294005026795	0.74388669684307	1.89437891811755	2.7878173099417	1.1422879094390204	66.0	112.0	2.440555736347417	0.01149294374774922	Simulations
1.1306917691965481	1.045861570682148	2.3137230860780504	2.3525877924856347	1.2218960232890865	75.0	76.0	1.9253584164657187	0.012435882062234907	Simulations
1.1111841496389285	0.6157165143838812	1.5637797408852514	2.105409684867266	0.9942255352283372	63.0	103.0	2.117637910379892	0.010509280850427136	Simulations
1.3871554825688943	0.6638999404353478	2.009302608873611	2.6265671039660345	1.2394116213971402	66.0	104.0	2.1192048376996886	0.010418490790324968	Simulations
1.9684645807733234	0.6852430813812294	1.8482758505704748	3.0522891586539194	1.083824577880596	78.0	147.0	2.81622065133698	0.010161635195850697	Simulations
1.2115714440386576	0.6410484411121102	1.814421222154996	2.3938829818185274	1.1823115377798699	43.0	71.0	2.024748051020234	0.014334399968955771	Simulations
1.112034796334604	0.7231249754004347	1.8740327368195169	2.2326451634153113	1.1206103670807073	65.0	83.0	1.9923474108414296	0.01198155705853422	Simulations
1.205822531675904	0.5621468237245679	1.7983963510984382	2.4294035894707644	1.2235810577948605	48.0	82.0	1.985486432626735	0.012066981738600309	Simulations
1.0395629735267147	0.6191592243626209	1.615678700910535	2.1029496456633034	1.0633866721365888	54.0	87.0	1.9775963915722146	0.011307448459069622	Simulations
1.406429067900029	0.8568864024434151	2.113370805625773	2.62145757863789	1.215028510737861	65.0	90.0	2.157527626282559	0.012326433696203424	Simulations
1.060630956454684	0.6086803978450106	1.4324344428191023	1.9573658383113206	0.8967348818566364	64.0	110.0	2.182769821843788	0.010237818207281674	Simulations
1.0169867969901332	0.6341155778837989	1.589735409211888	1.9854946754542757	0.9685078784641424	46.0	67.0	2.0500552650153643	0.015457653763646809	Simulations
0.8091156516624727	0.7190615670361046	1.6804350457410602	1.7724348342036351	0.9633191825411624	59.0	64.0	1.8399247791662234	0.013744481037850517	Simulations
1.4496126432146785	0.5706540143139895	1.9749275033242113	2.798621306527229	1.3490086633125506	53.0	99.0	2.0745762296700825	0.010634511813861392	Simulations
0.8769257482918478	0.6027797840703663	1.7114223592932059	1.908787400452961	1.0318616521611133	75.0	89.0	1.8498481811541592	0.009970863732695059	Simulations
0.6763518661014905	0.659566818177598	1.6245220016664301	1.839953950344904	1.1636020842434136	50.0	50.0	1.581257008095909	0.013221437476269346	Simulations
0.9057860697671445	0.570690311797311	1.9047440690596553	2.2002534783700654	1.2944674086029209	55.0	73.0	1.6997364813879183	0.010483713637013576	Simulations
1.2099236272684317	0.6184362181427683	1.668584899119455	2.276376096578676	1.0664524693102444	53.0	89.0	2.1345312258041664	0.012291227727579632	Simulations
0.8905920789826041	0.7313831844046774	2.001911143768567	2.101214624240874	1.2106225452582697	74.0	80.0	1.7356480204923066	0.009943430089099163	Simulations
1.339115799226113	0.683911813878199	1.6916183992533915	2.3726762226304805	1.0335604234043676	58.0	96.0	2.2956337809600904	0.012488463639345028	Simulations
1.2528437466488511	0.4633908492841339	1.6661142111224325	2.459250031901475	1.206406285252624	51.0	118.0	2.0384923901374594	0.008707648907926226	Simulations
1.2536340781134931	0.5305898832900728	1.6564955727233608	2.3434516914566634	1.0898176133431703	57.0	100.0	2.1503154865223664	0.011045483423499022	Simulations
0.5888691173748299	0.6053088849818029	1.7466113646968124	1.7292285576962105	1.1403594403213806	46.0	44.0	1.5163890406421965	0.013650907611539444	Simulations
1.304877923910008	0.5773461681152815	1.480735088740663	2.258159726316142	0.953281802406134	55.0	109.0	2.36882705682247	0.01141443003884026	Simulations
0.968493214625672	0.7123009472652156	1.5351483148919547	1.850094228702014	0.881601014076342	71.0	94.0	2.0985618200999547	0.011376605991681762	Simulations
1.669201310626887	0.7324371436757702	1.7772911971144274	2.6534078216255903	0.9842065109987032	82.0	129.0	2.695986860453808	0.011091577249709529	Simulations
0.858476965835499	0.761536968804099	1.699529647563871	1.8185219748600177	0.9600450090245186	64.0	71.0	1.894204915150571	0.012980174789382692	Simulations
1.325175167412075	0.7764128362697329	1.6941818537842073	2.270288807184922	0.9451136397728468	56.0	84.0	2.4021331527186236	0.015051382420647599	Simulations
1.4306156684868068	0.5930230750698615	1.6372101200581681	2.4454166855877646	1.0148010171009578	56.0	106.0	2.4097499355821808	0.01197059851852951	Simulations
0.9317394948646203	0.6203570773398954	1.846236805935786	2.2080256611677163	1.276286166303096	50.0	77.0	1.7300396411594015	0.010270196043466162	Simulations
0.9369362295361388	0.5184281769880876	1.8457234981504334	2.1678418977126808	1.230905668176542	59.0	80.0	1.7611763059992338	0.01020674175259639	Simulations
0.9756060761383127	0.8155890217798565	1.6873182219568952	1.8701596236070825	0.8945535474687698	98.0	113.0	2.0906066818458093	0.009415235971125513	Simulations
0.9903814655290795	0.7837056159487763	1.9183394694760512	2.1315518738831374	1.141170408354058	67.0	81.0	1.8678646574419455	0.011128270659302004	Simulations
1.0025981413294438	0.703254720032906	1.7236377901123507	2.0514072902243425	1.0488091488948987	66.0	90.0	1.9559395457084388	0.010754019778647178	Simulations
1.5842791898091724	0.5867382217600166	1.847747679303358	2.811948439682648	1.2276692498734758	48.0	96.0	2.290477211164529	0.012454668843765964	Simulations
1.0181558794711627	0.6442681687094116	2.074221563005615	2.4792799382786206	1.4611240588074579	51.0	75.0	1.6968305485997968	0.010171233327058356	Simulations
1.0359750709602336	0.6009451972156503	1.7583526669691836	2.2074796376626606	1.171504566702427	47.0	73.0	1.8843115941718567	0.012521062357585582	Simulations
1.2807856525563852	0.9510421037323382	2.155489941305626	2.54292487019648	1.2621392176400947	71.0	91.0	2.014773675245711	0.011105689957999305	Simulations
1.38629714936406	0.5488495552176618	1.6196602907441457	2.4622632392680046	1.0759660899039447	62.0	129.0	2.2884208548689666	0.0092585457142094	Simulations
1.3247590417885617	0.5654489251873331	2.174140254416761	2.9056678049651663	1.5809087631766046	43.0	81.0	1.8379731156190522	0.010840934126019932	Simulations
1.0989340466054833	0.5651701500290678	1.678967793332822	2.2778724289598458	1.1789383823543624	40.0	75.0	1.9321386622521282	0.012669315128423564	Simulations
1.1049154834850803	0.6760364221865673	2.040367399639793	2.4431666610485947	1.3382511775635144	57.0	79.0	1.8256413310218367	0.010992447576468086	Simulations
1.421758234285955	0.8038126465068895	1.9456408200043782	2.5864840733942054	1.1647258391082504	56.0	87.0	2.2206805984269193	0.01322990694569043	Simulations
0.8469656640797119	0.5807508049224643	1.9510785991484951	2.185305124885992	1.33833946080628	48.0	63.0	1.6328481591430166	0.011228422839477926	Simulations
1.2675254338960533	0.7298147134006758	1.8195471254926268	2.369737050347213	1.1022116164511595	52.0	80.0	2.1499837372220427	0.01380407183885951	Simulations
0.9008904057102092	0.5623485230157972	1.7572264727489062	2.103596072010353	1.2027056663001436	52.0	75.0	1.7490530983208867	0.010754321169707617	Simulations
1.0503825421637458	0.8327621078620107	1.7265929541077423	2.0283930322474055	0.9780104900836596	63.0	80.0	2.073999259531353	0.013155192238421083	Simulations
2.0795677728784216	0.5688157082831198	2.0974143666986493	3.61344633018133	1.5338785573029083	45.0	131.0	2.3557577703772226	0.009436574064072443	Simulations
1.192173442526499	0.6294538967706481	1.4886700365729149	2.088014322513183	0.8958408799866842	68.0	115.0	2.330787050647007	0.010615801743616446	Simulations
1.1056638508898131	0.9322085136962055	2.03502985106362	2.2404665829600146	1.1348027320702014	79.0	91.0	1.9743225140749963	0.010784150324019933	Simulations
1.0399797503744386	0.8354719488405831	2.1009377367358404	2.297974882235886	1.2579951318614475	63.0	74.0	1.82669616442441	0.011746441750053975	Simulations
1.0154379125174502	0.8287003015936492	2.095366000367549	2.2948170624807025	1.2793791499632523	68.0	79.0	1.7936958426644805	0.010670066745972075	Simulations
0.9208667106454165	0.5916000585983017	1.9340197166443311	2.2579362994757006	1.3370695888302842	59.0	81.0	1.688720107269079	0.009332472000459327	Simulations
0.9186092349041424	0.694093046143021	1.7788354639364063	2.0074612796053297	1.0888520447011873	56.0	69.0	1.8436492720700501	0.012790785938442035	Simulations
1.2294408148910456	0.4307487985685714	1.5858699501114524	2.355674341324799	1.1262335264337535	40.0	83.0	2.0916393323719467	0.012826916925397785	Simulations
1.5992084035452725	0.8690790864789777	1.8963641522959416	2.6193324289421516	1.020124025396879	85.0	126.0	2.567660758625012	0.010797258770145682	Simulations
1.1445074302273723	0.7442993995752218	1.8680264698015796	2.2230401501214243	1.078532719894052	72.0	92.0	2.061170800956137	0.01134200065414797	Simulations
0.9473090660905843	0.930133920824205	1.899876423576262	2.0327844663610724	1.085475400270488	63.0	70.0	1.8727135279662033	0.012930431786463862	Simulations
1.3152288575956206	1.0264747010720496	2.2688878853339536	2.554412187780677	1.2391833301850563	80.0	95.0	2.061367455128054	0.01098528104900775	Simulations
0.6860482612569079	0.703510429092572	2.036339920020019	1.8950714903051495	1.2090232290482417	51.0	49.0	1.5674400993907898	0.013232863483152293	Simulations
1.032000488727437	0.3495916694073248	1.2285232104772603	1.8810468484614629	0.8490463597340259	40.0	83.0	2.2154819073138996	0.013826753555824724	Simulations
1.2241678904492554	0.7738197792976407	2.129275782300834	2.5585901582222053	1.3344222677729498	53.0	72.0	1.9173766955285447	0.01304352503494489	Simulations
0.9726810827922066	0.736830448635128	1.7626093089770454	1.9976262014659376	1.024945118673731	85.0	101.0	1.9490079664468731	0.00953207908448165	Simulations
0.6168345251391645	0.5561703126862618	1.6976286204013054	1.762241148453408	1.1454066233142435	50.0	54.0	1.5385288617891424	0.01151021310990797	Simulations
0.8822167992435875	0.6627721583757273	1.4172713966128774	1.6822489289889324	0.8000321297453449	97.0	120.0	2.102726711143967	0.008935511307650914	Simulations
0.8367346579682358	0.7023396552882721	1.8482299605427794	2.0027145958288473	1.1659799378606115	64.0	74.0	1.7176235463394949	0.010546133430802806	Simulations
0.808998372299371	0.7388279422934441	1.931593065166318	2.0168987699061955	1.2079003976068245	52.0	56.0	1.6697558622401436	0.013207806773146145	Simulations
1.42304687320523	0.6858432750557273	2.0262048058944258	2.71345409545026	1.2904072222450302	50.0	82.0	2.1027889868203276	0.013076879073766066	Simulations
1.1797380457098503	0.9920275364576006	2.042676370671119	2.3191073185206506	1.1393692728108002	66.0	81.0	2.0354308070810627	0.01265844665423663	Simulations
0.7750673253443813	0.6797669571938103	1.5476497624445187	1.632177398258809	0.8571100729144278	63.0	68.0	1.9042798000365613	0.0136653745968987	Simulations
1.1293507085337466	0.5812206866113188	1.7010746421594103	2.217957178625703	1.0886064700919562	49.0	74.0	2.0374278856144854	0.013874986436778381	Simulations
1.3689560358862045	0.6309343230281095	1.8992258975254774	2.6493059292768097	1.2803498933906052	56.0	100.0	2.069204631447232	0.01049076325804932	Simulations
1.069274789220856	0.7222359671999714	2.0963603062634095	2.445210466307969	1.375935677087113	46.0	63.0	1.7771255640994317	0.013167390787864136	Simulations
0.953571223128157	0.8133037451321325	2.0252727214892032	2.191122326669646	1.237551103541489	61.0	70.0	1.7705307848696759	0.01177402755165685	Simulations
1.474406116037198	0.8033365991281387	2.3523059985226786	2.9294378281482567	1.4550317121110588	73.0	106.0	2.013315451316198	0.009524275802343381	Simulations
0.8977881982136788	0.5541712424576724	1.5064709930035483	1.8794311324023023	0.9816429341886235	67.0	104.0	1.9145771511672371	0.009009863434888521	Simulations
0.8757649620332674	0.739452758801173	1.747181208749174	1.8658225628849898	0.9900576008517225	77.0	85.0	1.884559606713658	0.010755616784804857	Simulations
1.4529316358559277	0.7573799878359941	1.7117996481322615	2.42921942970547	0.9762877938495425	75.0	118.0	2.4882206302374827	0.011145037413083914	Simulations
1.199600286930319	0.6256213336464849	1.6622299605826867	2.2289105409568766	1.0293102540265575	63.0	100.0	2.1654409175830165	0.011146608100998701	Simulations
0.9620575072824846	0.8494539954875673	2.160369921952033	2.2307426901491985	1.2686851828667138	64.0	67.0	1.758310667039261	0.012152089485217505	Simulations
0.8994533753430047	0.409735228483759	2.0831412767645863	2.609477824625781	1.7100244492827763	22.0	50.0	1.525988605437926	0.012194883792078335	Simulations
1.3688083381692353	0.5425325296956007	1.7969730273476197	2.6249043098359697	1.2560959716667344	45.0	94.0	2.0897322888098597	0.011311895037540706	Simulations
0.9383409916747072	0.9159418769265473	1.9274999643921698	1.9689604103299647	1.0306194186552575	86.0	88.0	1.9104631396321308	0.010612754803265277	Simulations
0.7668292049817649	0.748527639421618	2.0485449882084237	2.086151124286431	1.3193219193046661	52.0	52.0	1.5812297921843925	0.012712443126094052	Simulations
1.4005891819870127	0.5518421915528442	1.9457921700373568	2.7931840667817576	1.392594884794745	47.0	95.0	2.0057405763008	0.010569842304919442	Simulations
1.6276480144738317	0.45829350559449034	1.5189176152455655	2.6823965594066737	1.054748544932842	46.0	114.0	2.5431621330916054	0.011812486319819047	Simulations
0.9694833214526988	0.6754316654543866	1.8896569664419685	2.171383444631019	1.2019001231783204	50.0	65.0	1.8066255279922798	0.013127653840302405	Simulations
0.8283472789612654	0.575322371234984	1.7404176736697583	1.9812050225965612	1.1528577436352958	55.0	70.0	1.7185164722485582	0.011159481146194025	Simulations
0.8658154203629356	0.5228821316183891	1.6182636589094639	2.0345571807500824	1.1687417603871468	38.0	64.0	1.7408098604058893	0.012496228648890762	Simulations
0.6611694071080456	0.6428277322959179	2.160455320769611	1.9160469480458775	1.2548775409378319	44.0	44.0	1.526879624137604	0.013876961992834029	Simulations
0.96450254537814	0.4368468047143257	1.6523583232176808	2.210483233875968	1.245980688497828	36.0	75.0	1.7740910868698598	0.011027734447962631	Simulations
0.5278134419895866	0.5179409513774267	1.5851043446513289	1.5655805328230077	1.0377670908334211	65.0	65.0	1.5086049140040705	0.009126385082453595	Simulations
1.0210395422195293	0.6386518044622682	2.105326671943012	2.43484265218841	1.4138031099688808	64.0	84.0	1.7221935890648898	0.009336277653858175	Simulations
1.211820577814805	0.6517355709369006	1.7460905891848597	2.2844915374794335	1.0726709596646284	64.0	97.0	2.1297225555483315	0.011243974217392694	Simulations
1.3014945026922846	0.9703755248853658	2.089701750201869	2.50486825244297	1.2033737497506856	61.0	82.0	2.0815380532955183	0.01289816991599131	Simulations
0.8598080044758996	0.6133589478231849	1.7452746735405553	1.98440344540456	1.1245954409286605	58.0	73.0	1.76454871964081	0.01122327758693272	Simulations
1.0016640663851217	0.5746121286335788	1.8044422641720606	2.18681944197557	1.1851553755904485	60.0	83.0	1.8451753137314078	0.010647685495034902	Simulations
0.9902551005643769	0.8095381814318909	1.8905149178795704	2.149739712627205	1.1594846120628282	56.0	70.0	1.8540476434634379	0.012723975962501992	Simulations
1.1241464270869281	0.7289419207570154	2.041935094340983	2.458927341615183	1.3347809145282548	44.0	64.0	1.8421954605818063	0.013772283474181924	Simulations
0.7701155413465524	0.6484810105285108	1.6746503994263757	1.8435938750695875	1.0734783337230351	55.0	66.0	1.7174020351911896	0.01182163343242223	Simulations
1.3543406861084624	0.7763303598854867	2.2909070136205956	2.873376661564008	1.5190359754555456	55.0	87.0	1.8915790725116353	0.010570012479741946	Simulations
1.3376738403910986	0.6679474014073907	1.6822778551001594	2.3802126320942145	1.042538791703116	50.0	87.0	2.2830926302568013	0.013689533266283794	Simulations
1.085838497356961	0.5572708344681998	1.6719012862438556	2.240854700430566	1.155016203073605	37.0	70.0	1.9401067227173474	0.01365908593358066	Simulations
1.3801490448841844	0.8301524491661665	2.0585973181156128	2.523557335899251	1.1434082910150665	79.0	104.0	2.207048309627832	0.01098190585402912	Simulations
0.7287256373640503	1.0013057349242176	2.1822535019983365	1.9727988030747667	1.2440731657107165	74.0	57.0	1.5857578617152654	0.011669692888437094	Simulations
1.100520359099665	0.5520869794435385	1.3818219425232028	1.922005520218974	0.821485161119309	71.0	116.0	2.339671623039616	0.010571603959239296	Simulations
0.8535430370205572	0.5089020122283494	1.551543306961583	1.8323892927059353	0.9788462556853781	67.0	89.0	1.8719888665487259	0.010163728704203887	Simulations
1.1727573442716877	0.7160167056580725	1.5490469853269229	2.0120699047738246	0.839312560502137	71.0	102.0	2.397283204686059	0.012366670125660804	Simulations
0.9138385344527825	0.9124487534436871	1.8841500999491752	1.9116752156516876	0.9978366811989051	86.0	87.0	1.9158197445245264	0.010781170428717839	Simulations
0.8399962465744779	0.6916059377947916	1.7363083935195902	1.9180974885126054	1.0781012419381275	61.0	73.0	1.7791441229252247	0.011386073747557127	Simulations
1.5220012327256653	0.6858199203167374	2.0189590032711298	2.753734167844984	1.2317329351193185	62.0	96.0	2.2356584689182064	0.012090623033789822	Simulations
1.173900735595129	0.6639081469465964	1.830067986247302	2.3215767551916127	1.1476760195964837	69.0	103.0	2.0228502779101944	0.00986785963286257	Simulations
1.4386603412218197	0.8181600401616773	2.366818830270428	2.90696698229843	1.4683066410766101	47.0	71.0	1.9798091903792978	0.013878329482466317	Simulations
0.8646829051916697	0.6361000436766135	1.5398778022190247	1.8239311498172226	0.9592482446255529	55.0	74.0	1.9014172400484326	0.01252804251962198	Simulations
1.3520673155380485	0.6974595956960539	2.007959432795386	2.705209078186478	1.3531417626484297	58.0	107.0	1.9992059611638338	0.009340440264694468	Simulations
1.054302317508032	0.7248533746529677	2.2879568383369935	2.5561851620234175	1.5018828445153856	59.0	74.0	1.7019870566856532	0.010367838724618194	Simulations
1.3636721965911265	0.7238031411929859	1.7696693489456103	2.3464791901853173	0.9828069935941908	97.0	138.0	2.3875279739352346	0.009097953890319381	Simulations
0.895833339582302	0.6976477561043481	1.3560940405906738	1.6122472034478625	0.7164138638655605	89.0	112.0	2.250441099434685	0.010448283979530947	Simulations
0.9163772694178423	0.7587552495223222	1.863675271870726	2.0072076172962077	1.0908303478783654	78.0	88.0	1.8400731343789347	0.00999730804390076	Simulations
1.0669078549322908	0.6882493775278588	1.4565647078100532	1.8990739194736233	0.8321660645413325	67.0	99.0	2.2820852716703146	0.012023764645620843	Simulations
1.1659726618578659	0.7109860278894888	1.9137848685604746	2.319855746950414	1.153883085092548	55.0	76.0	2.010477297848896	0.013257079545152857	Simulations
1.1245950487206464	0.4343670835498774	1.390266843769653	2.1095130489925036	0.9849180002718573	37.0	79.0	2.1418159160561947	0.013909297332101172	Simulations
0.8901208118423045	0.7737244107389916	2.130487951232279	2.2332008869931936	1.3430800751508891	68.0	74.0	1.6627458990055402	0.009913077198236121	Simulations
1.4182104529390989	0.705207396696633	1.9519161042066437	2.6100637099171475	1.1918532569780487	65.0	103.0	2.189920356919593	0.010979401969027122	Simulations
1.3477846069130968	0.6744080481640644	1.892885014260223	2.6384902253474545	1.2907056184343577	44.0	90.0	2.0442230882577057	0.011461696085821914	Simulations
1.3373260283417443	0.6112244062789973	1.9603489349796817	2.6478167870048805	1.3104907586631362	48.0	84.0	2.020477267391022	0.012079715710645627	Simulations
0.9224252719054955	0.6809914206620793	1.6632537398033924	1.8984975571444347	0.9760722852389392	62.0	76.0	1.9450378684604173	0.012628924259197143	Simulations
1.1281869850063049	0.5751370233279696	1.8336189882464646	2.3695126716647814	1.2413256866584765	40.0	63.0	1.9088565532251818	0.01480489985954407	Simulations
1.507726266873371	0.5811789715819422	1.8189096288978106	2.706669499572027	1.198943232698656	54.0	102.0	2.257546000305358	0.011517209654019856	Simulations
1.088780031054567	0.6168568087600115	1.4040587922663441	1.943691821971055	0.8549117909164881	54.0	89.0	2.2735583280321423	0.013314067604840022	Simulations
0.9611885755736103	0.7808873500166058	1.9278780186206073	2.1239086800179834	1.1627201044443731	96.0	111.0	1.826672362419442	0.007830791810302285	Simulations
1.0158460920996555	0.7372576655805183	2.5077808384213554	2.7222126647894447	1.7063665726897892	47.0	56.0	1.5953269996952362	0.012033074437420967	Simulations
1.2498401381650437	0.6649449977552779	1.6131153017080646	2.218069233043954	0.9682290948789106	71.0	111.0	2.290851663904349	0.010773730135045498	Simulations
1.3148625953509383	0.7950959941541014	1.8745741191276677	2.3965175130145018	1.0816549176635635	81.0	119.0	2.215602660219136	0.009644530889269308	Simulations
1.1124692415069972	0.8741661981120727	2.0492784582732844	2.347905513557842	1.2354362720508447	59.0	76.0	1.9004667150174244	0.012188865235551306	Simulations
0.9420749016627963	0.6735654182891815	1.724645770259608	2.019697805038002	1.0776229033752056	61.0	83.0	1.8742157379099298	0.010919120829198993	Simulations
0.9141733986594569	0.7657393351175339	1.8129585544267794	1.9883389396526507	1.0741655409931938	70.0	82.0	1.8510544825466984	0.010833504378477575	Simulations
1.184471503493943	0.6262283100786887	1.9227825507900862	2.450234664820779	1.2657631613268359	60.0	94.0	1.9357765652243515	0.01013736639161906	Simulations
1.0038700919364363	1.0278833964607252	2.140272408985531	2.116258875639886	1.1123887837034498	59.0	57.0	1.9024453560150751	0.016278158171204492	Simulations
0.7852984542298425	0.7336200418320171	2.0655353287425084	2.1065772069130437	1.3212787526832013	44.0	45.0	1.5943472962348701	0.014954798342817063	Simulations
1.276351912015642	0.5804112155208321	2.042948010977003	2.6532088044382194	1.3768568924225775	66.0	104.0	1.9270040474358252	0.009099611556162797	Simulations
1.1394983603785864	0.6603078683149204	1.632220248820713	2.1099535584356577	0.9704551980570713	66.0	96.0	2.174189558322685	0.011671643002933291	Simulations
0.8785547294215175	0.5290530664434947	1.4971657845438988	1.913948905229289	1.0353941758077716	45.0	74.0	1.8485219928305137	0.011978002812470445	Simulations
1.0282363891869901	0.6614290124227541	1.450459605123082	1.8160478135789357	0.7878114243919456	102.0	137.0	2.3051808559143594	0.008794744113729196	Simulations
0.6749283252082803	0.790579678514314	1.8083098277786203	1.7931459075579237	1.1182175823496434	78.0	68.0	1.6035751323012593	0.010018999263969012	Simulations
1.0648284587701962	0.8089313298879348	1.942778661013395	2.234370608045418	1.169542149275222	69.0	88.0	1.910466082329809	0.01061278005542433	Simulations
0.8370797065401011	0.5985885233906592	1.5792982248619192	1.8355222748370341	0.998442568296933	68.0	89.0	1.8383854345953294	0.009870104188379346	Simulations
1.954396034611026	0.6692447520774207	2.163102665739259	3.3264378433901016	1.3720418087790756	63.0	124.0	2.4244434988101156	0.010303658325768515	Simulations
1.369843131672998	0.5632056798032551	1.5582131030999888	2.3656018463190787	0.9957587146460807	58.0	111.0	2.3756777736661605	0.011246298817022748	Simulations
1.19891969784183	0.8158772625199988	2.072580054303679	2.4200228878108523	1.2211031899690223	60.0	77.0	1.9818332371011536	0.012816046375786257	Simulations
1.245064292310633	0.8163795920076058	1.9447692545621367	2.394407523510947	1.1493432312003142	50.0	71.0	2.0832832686632283	0.014913507312286953	Simulations
0.6962898068448713	0.6690074171613218	1.5827607003641855	1.6582668944446484	0.9619770875997771	77.0	83.0	1.7238112173567248	0.009465081768484427	Simulations
1.0625742699988148	0.5874297215692375	1.6521509336339835	2.121747417734537	1.059173147735722	62.0	95.0	2.0032111107332766	0.01055067862376676	Simulations
1.101184241924836	0.6469367408488323	1.6311226468759623	2.062828325133044	0.961644083208208	66.0	95.0	2.1451058256929096	0.011589987607930598	Simulations
1.2190069134002215	0.582264672904997	1.8056062035286096	2.47861195261644	1.2596050392162184	50.0	97.0	1.9677691621166753	0.010067639060484121	Simulations
1.1989782714210702	0.6555631706406302	1.6505548831512318	2.317441081696802	1.1184628102757317	66.0	134.0	2.0719876069240866	0.00784339831291442	Simulations
1.1267881867180731	0.6191918361330185	1.6938943398270334	2.16903000859691	1.042241821878837	84.0	126.0	2.0811197200730494	0.008391745722466374	Simulations
0.7466522108774614	0.6418785863246463	1.9190524115585275	1.991094332139693	1.2444421212622316	56.0	60.0	1.5999895038269323	0.011301040680767892	Simulations
1.1566624909311194	0.6417912785854394	1.8858229847488424	2.389447352114726	1.2327848611836065	50.0	76.0	1.9382516993440353	0.012562578023574043	Simulations
0.9263322125336879	0.6618513876482459	1.7854082064540668	2.084804180843087	1.158471968309399	59.0	80.0	1.7996155607334365	0.01059610933290986	Simulations
0.9057603805778944	0.7143359737374491	2.2244482059494914	2.4093295666522123	1.5035691860743179	45.0	54.0	1.6024068522864268	0.012597046214737555	Simulations
1.3014899254829413	0.6298063762459591	1.7509494195899384	2.43220336052869	1.1307134350457486	50.0	85.0	2.1510342807859915	0.0130003590236372	Simulations
1.2638326505398763	0.5267785611874133	1.4533049458566885	2.2049981502342457	0.9411654996943695	50.0	98.0	2.3428378440883018	0.012533235752469946	Simulations
0.9214068302455034	0.7232070668866963	1.7932625686179124	1.969191287349181	1.0477844571036776	56.0	65.0	1.879385854598844	0.014004019927177869	Simulations
0.7026052769703355	0.8989231415696131	2.339613579154872	2.0329096083363547	1.3303043313660192	57.0	46.0	1.528153791883747	0.013299777001735172	Simulations
0.5310181054586293	0.6805092359718833	1.4456993901399566	1.4006208945910614	0.8696027891324322	58.0	47.0	1.6106444368565156	0.014630596644147198	Simulations
1.240940637232533	0.8011437176793261	2.0109784780030133	2.456072131540694	1.2151314943081613	73.0	99.0	2.021239794248824	0.010254954436212185	Simulations
1.1308243150316184	0.7787400897506365	2.614764327499146	2.9084725318017126	1.7776482167700942	48.0	61.0	1.6361350374970558	0.011644128282426624	Simulations
1.2233629614921648	0.6636388058912124	2.181417080817989	2.720961536767869	1.497598575275704	43.0	70.0	1.816883096504647	0.012306651362871098	Simulations
0.8794426680427745	0.5519415433825712	1.7294946919391474	2.0295787129266305	1.150136044883856	51.0	70.0	1.7646422977132092	0.011705368160711816	Simulations
0.5455570554517608	0.4986874227928565	1.2857953805290394	1.3598264903646367	0.8142694349128758	56.0	62.0	1.6699957434975239	0.011932974605611716	Simulations
0.8069672918850312	0.5299044063829954	1.853734755522714	2.070734092741	1.2637668008559688	37.0	48.0	1.6385412968108197	0.014841917378297693	Simulations
1.0363766285449822	0.6777751591179051	1.898644255844621	2.310631063370597	1.2742544348256148	47.0	70.0	1.8133200091132609	0.012266193570204083	Simulations
0.7887588845154883	0.5299424376365476	1.617017997527841	1.9090594192531485	1.1203005347376602	43.0	60.0	1.7040600803606607	0.012816270030428302	Simulations
1.3072792838312342	0.7027774093966158	1.807392536173714	2.370420322774202	1.0631410389429676	69.0	106.0	2.2296386236119736	0.010913300936854827	Simulations
1.2877029963662894	0.67333625497163	1.6986403094383826	2.3502399601317534	1.062536963765464	69.0	122.0	2.2119135995070445	0.009387664204523223	Simulations
1.3774788901924266	0.4916231485297673	1.4366970331896702	2.2651329213972713	0.8876540312048447	66.0	122.0	2.551819562316103	0.011078084594902594	Simulations
1.1495641822719749	0.8957234065829995	2.196575156292048	2.445504306955795	1.2959401246838202	57.0	69.0	1.8870503817083697	0.013277289006821564	Simulations
1.7711369992160773	0.5234636228118419	1.6751469681326958	2.973909426218747	1.2027724270026696	50.0	145.0	2.4725453954991155	0.00900687592313834	Simulations
0.6435814017269251	0.6910745756136031	1.8806159405471012	1.6263403282750233	0.9827589265480982	75.0	70.0	1.6548720996994444	0.010381710279922886	Simulations
0.7726017232464409	0.48384693666015366	1.400047167227415	1.7210646766283415	0.9484629533819006	63.0	92.0	1.8145829212322975	0.009343891145075887	Simulations
0.7110166149317763	0.5936752335648949	1.6791693328708754	1.7816161523667136	1.0705995374349373	70.0	78.0	1.6641293873854175	0.00942009754523727	Simulations
0.9067252101152756	0.8902330905668547	1.868790338417218	2.0738570488452286	1.167131838729953	72.0	72.0	1.7768832791863118	0.01151873494434088	Simulations
0.8792610168415493	0.791354487348062	1.607794213507177	1.7559218290970686	0.8766608122555193	76.0	87.0	2.002966032643047	0.011518827073250729	Simulations
1.226266190325408	0.7488929121743974	1.4734672761060656	1.9511029786191032	0.7248367882936952	87.0	120.0	2.6917824952181366	0.011904682001712057	Simulations
1.132946104567813	0.7753815761355207	1.5764939429136244	1.9347099935291627	0.8017638889613496	84.0	108.0	2.4130670140750485	0.011767296126545423	Simulations
0.8276988447843192	0.4482085073734685	1.825415306230224	2.2360104221147394	1.4083115773304202	38.0	67.0	1.5877242352528949	0.00995463222337878	Simulations
1.1744047229947938	0.5201734601815926	1.7155248478727698	2.3730179584621682	1.1986132354673744	51.0	98.0	1.9798028990868426	0.010054661313850244	Simulations
1.2594647798744902	0.8064687063177871	2.0712334532216454	2.4688755814414325	1.2094108015669423	66.0	86.0	2.0413870772798597	0.011971508891807921	Simulations
1.055893776276047	0.742284406945823	2.2057916701801874	2.4775453924984805	1.4216516162224335	54.0	67.0	1.7427232974853104	0.011960351080565498	Simulations
1.1038403054970372	0.5575845437879192	1.8386163103893851	2.3993383912756427	1.2954980857786056	44.0	78.0	1.8520586156124033	0.011399099474711369	Simulations
1.3207344439072952	0.4981755694048152	1.4007576412314753	2.2381393480165306	0.9174049041092354	53.0	111.0	2.439641796104935	0.011591615653830774	Simulations
1.1193453897981915	0.7941751019751577	1.952897883401033	2.268017706619697	1.1486723168215054	61.0	77.0	1.9744688484314965	0.012746293588380043	Simulations
1.30713445285891	0.697620065470141	2.293764671487134	2.898485600797386	1.591351147938476	54.0	86.0	1.8213991327760966	0.0100586872362189	Simulations
1.1696233893960977	0.8352360634869664	1.9061805275497608	2.274837929916658	1.1052145405205605	81.0	103.0	2.058277236241572	0.010111041910075782	Simulations
0.5344394939310084	0.6776595413155864	2.0553215234398583	1.7617233449309175	1.227283850999909	46.0	37.0	1.4354652703167101	0.014095092604507737	Simulations
1.7994879564409818	0.6367806961613411	2.0571924001801243	3.172596757372168	1.3731088009311863	46.0	99.0	2.3105210273363936	0.012204224435202157	Simulations
0.7723815517998374	0.4226376897685058	1.6670895552231433	2.031603441726501	1.2592218899266638	31.0	53.0	1.6133800229956456	0.01302049618087411	Simulations
1.7654280558410107	0.45635757510691866	1.7219088692850553	2.895865506507173	1.130437450666162	54.0	110.0	2.5617211326470573	0.012337394848649806	Simulations
1.432585360586556	0.8597251146028212	2.0195731426922325	2.5031257771548074	1.0705404165682515	98.0	129.0	2.33818895430299	0.009499159085336923	Simulations
1.2385175581315067	0.7918173216638806	2.5737241689705774	2.936666515277125	1.6981489571456185	62.0	79.0	1.7293338743459252	0.010002739622882735	Simulations
1.4126021160566793	0.6598745615516273	1.8704066342036691	2.6162264067696563	1.203624290712977	60.0	105.0	2.17362380184261	0.01066764065437233	Simulations
1.191170235365629	0.6737752365533927	1.7226240314518209	2.2341685142460137	1.0429982788803847	64.0	93.0	2.1420634717099447	0.011817217520121649	Simulations
1.2662246986880592	0.631557791066178	2.0513920308032354	2.597831568290813	1.3316068696027537	60.0	91.0	1.9508997945210367	0.010594941512744939	Simulations
1.1688685609796747	0.6668965782797796	1.811820760043281	2.3458186063358113	1.1769500453561366	52.0	83.0	1.993133536628552	0.011988414115431995	Simulations
1.314037741479995	0.6822573570764445	1.8448057328661651	2.506639736861847	1.1926019953818519	51.0	86.0	2.101824201676991	0.012460953559697582	Simulations
1.134357162884656	0.551041840432617	1.8915602421629099	2.4742804241622904	1.3399232612776344	39.0	70.0	1.8465836780854388	0.012640837712353189	Simulations
0.9026555542204513	0.5606220604657138	1.4170411485144772	1.793001410387626	0.8903458561671747	62.0	92.0	2.0138257486885696	0.010977596260294927	Simulations
1.4614628269298393	0.6377398636533984	1.9409984584724744	2.7036981664716295	1.2422353395417902	77.0	125.0	2.1764782247049204	0.008975964690232787	Simulations
1.2627285867729952	0.8342778843021091	1.7878271609569336	2.1626645862639275	0.8999359994909325	98.0	124.0	2.403131542117755	0.01020093242396935	Simulations
0.8199627019246727	0.7025389280593217	1.8262171986780913	1.9742980046049345	1.1543353026802619	56.0	65.0	1.7103332108277323	0.011911960330348097	Simulations
1.0392762291810234	0.5926584897882523	1.9227198979147657	2.3036242845087456	1.2643480553277222	57.0	82.0	1.8219858644158236	0.01055502153982968	Simulations
1.222944323387793	0.6108758509286957	1.5036885121934969	2.1124865101625208	0.8895421867747276	61.0	101.0	2.3748019392108923	0.012354526695966877	Simulations
0.8549666553799344	0.6252441095735497	1.6000133273741457	1.8802689034348339	1.0253022480548994	49.0	68.0	1.8338679223632752	0.012866025556401619	Simulations
0.6796994130703069	0.823654897471886	2.241193410981568	1.969910279362027	1.29021086629172	57.0	48.0	1.526812655844293	0.012719230214663856	Simulations
1.217131153255817	0.6731317339752243	1.7454306555123396	2.3627768888274585	1.1456457355716414	48.0	82.0	2.062397489437262	0.012735639178246442	Simulations
1.0989203023469076	0.6141788686674847	1.8651245142582067	2.3485303347247255	1.2496100323778179	59.0	93.0	1.879410595204513	0.009787960075949632	Simulations
1.0642354696724108	0.8706378782107616	1.98527539769118	2.176038809639762	1.1118033399673513	79.0	90.0	1.9572155716888409	0.010764474067458422	Simulations
1.1456833559199444	0.7656540187812275	1.8599488235286137	2.2406253205096607	1.0949419645897163	57.0	77.0	2.046341626288149	0.01341619500989786	Simulations
1.0025876256193433	0.7647204944977131	1.7332644208275503	2.0537382549528496	1.0511506293335062	65.0	89.0	1.9538001478009344	0.010857111270423294	Simulations
0.7989403494648197	0.6988571996414292	2.1938225745772333	2.282513410510986	1.4835730610461662	48.0	52.0	1.5385244383592633	0.011952833846756782	Simulations
1.0818227074331912	1.1968602391535013	2.3460892909845508	2.1057723082525657	1.0239496008193745	132.0	122.0	2.0565194874508532	0.008526268383537816	Simulations
1.0637291791115835	0.8501438236857701	2.006137394495406	2.2469226286071704	1.183193449495587	72.0	87.0	1.8990323429909683	0.010635223869767622	Simulations
1.4521454072308546	0.8677682655860599	1.8091389457314635	2.4405127328336147	0.9883673256027601	103.0	154.0	2.469236557719325	0.00846795490989882	Simulations
1.1553792442329216	0.7593968338304655	1.8418250384305794	2.2563440040460994	1.1009647598131778	80.0	108.0	2.0494243652530506	0.009585358775677882	Simulations
1.088704736757061	0.5706937107093633	1.4326588477432838	2.0386258424909762	0.9499211057339153	60.0	117.0	2.146100165777368	0.009416388146488099	Simulations
0.9423967917726528	0.5735989902878098	1.8478530839225278	2.197700724900653	1.2553039331280003	56.0	77.0	1.7507319676951565	0.010492963999850564	Simulations
1.1879298582930782	0.6252817270188152	1.4906187262620532	2.0598375865203233	0.8719077282272452	57.0	91.0	2.36244905261749	0.013629485903702563	Simulations
1.615892929206142	0.7302204696233077	1.8513146459713963	2.8343176254643776	1.2184246962582357	51.0	109.0	2.3262148528083233	0.011174168371693027	Simulations
1.2403091378307944	0.8378777141113993	2.06912561984235	2.4284147863552046	1.1881056485244101	80.0	102.0	2.0439384236336386	0.010111291508051637	Simulations
1.2028143593997278	0.6162651635070828	1.7930007121494789	2.366651631290658	1.1638372718909302	57.0	90.0	2.033490152317832	0.011377311157857358	Simulations
0.9377656946534567	0.5178780752385395	1.726154597060085	2.129797068807693	1.192031374154236	60.0	91.0	1.786695480493385	0.009201030399140765	Simulations
1.31870402479116	0.5508237040918837	1.411895555878574	2.1237358035362655	0.8050317787451056	104.0	165.0	2.638076979826528	0.008481737354241264	Simulations
1.0572027834697024	0.7180440641866115	1.9434974202224977	2.2548521566920074	1.197649373222305	91.0	115.0	1.8827314630702576	0.007937628180680329	Simulations
1.4650232115775397	0.6348668770813046	2.1280390348848184	2.951324235259744	1.4863010236822045	52.0	99.0	1.9856840493509513	0.00999632411891348	Simulations
1.0031123267712045	0.4880823444057458	1.602613518017227	2.052821732261929	1.0497094054907246	58.0	87.0	1.9556095444360275	0.011122050018514075	Simulations
1.2291446992623225	0.7449280637802285	1.576917773603649	2.111578160057849	0.8824334607955263	80.0	123.0	2.3929035489590698	0.0102338394079021	Simulations
1.1383644259772072	0.5779092627484974	1.597213207267199	2.144428546634974	1.006064120657767	65.0	104.0	2.1315028561330087	0.010498759504421133	Simulations
1.2431666273065323	0.6327774941824591	1.9176567893775809	2.5750639079506845	1.3318972806441522	52.0	99.0	1.9333802579019406	0.009607327426459686	Simulations
1.205667333316428	0.6578498259497879	1.5573635562947876	2.147217652092481	0.9415503187760528	63.0	107.0	2.2805129043806267	0.011115498446456783	Simulations
0.8993105222113424	0.7344687759310946	2.0123645129671925	2.1526555451037557	1.2533450228924132	53.0	60.0	1.7175282989004528	0.013005564497370215	Simulations
0.6604699707378408	0.5211656899116595	1.6629676522133017	1.8286344144492837	1.168164443711443	40.0	50.0	1.5653912634418348	0.012930465964593298	Simulations
1.0314029946494003	0.7359155472595753	2.0595381034978324	2.3421579925368334	1.310754997887433	62.0	78.0	1.78687702607408	0.010736414752257667	Simulations
1.499797309731907	0.6096505891868373	1.9240939293093144	2.7789959600355982	1.2791986503036912	53.0	101.0	2.172450666185306	0.01108241005439624	Simulations
1.073324133947901	0.5300437663086479	1.8746416465097653	2.4480294028065708	1.3747052688586698	40.0	74.0	1.7807667274302466	0.011249980299235978	Simulations
0.9711716556489904	0.6440349016872713	1.581917084535926	1.9580937346251888	0.9869220789761983	52.0	76.0	1.984040864357248	0.013005812375559702	Simulations
1.0791018609962715	0.6655600943794888	1.793646348295138	2.2098778216275154	1.130775960631244	50.0	73.0	1.9543020886240579	0.01324182864227064	Simulations
1.6272953607198104	0.5757843498099731	2.0965294116348003	3.158934736388018	1.5316393756682076	56.0	131.0	2.062453333709752	0.007972225011111276	Simulations
1.0195615696619178	0.8509690095120237	1.987933604959686	2.067998024553645	1.0484364548917273	98.0	103.0	1.9724590984078367	0.009514518294436452	Simulations
1.1544392371741818	0.5855779713954081	1.6504131261631374	2.2125814338592207	1.0581421966850388	51.0	82.0	2.0910057653790046	0.012978012680142644	Simulations
1.224727481532389	0.7771604658622351	2.127178313578325	2.5785783064282515	1.3538508248958625	59.0	83.0	1.904625132260487	0.011198880419989484	Simulations
0.635222434276751	0.6161115751095194	1.7190943170602566	1.7484046791424632	1.1131822448657123	50.0	51.0	1.5706365127602089	0.012771555707732363	Simulations
1.1171535194265902	0.6111725880108898	1.5164347311662376	2.026012685084709	0.9088591656581189	63.0	100.0	2.2291822117650564	0.011565145462817823	Simulations
0.8384895441116695	0.5964878470168771	1.7775582407170512	2.0285855995411	1.1900960554294304	47.0	62.0	1.704556191314416	0.012409615471422372	Simulations
0.5873412602084378	0.646684490346729	1.7042159548749465	1.5825800890811796	0.9952388288727418	69.0	63.0	1.5901510704457646	0.01062164815204092	Simulations
1.6033188708903645	0.6708832629541792	1.915248147027548	2.84147634873868	1.2381574778483153	57.0	111.0	2.2949232222678417	0.010796809805473722	Simulations
1.4213849855520158	0.6721985446226159	1.7578746288007958	2.4834889566981677	1.062103971146152	71.0	124.0	2.3382729225822887	0.009882607505420003	Simulations
1.1302590171815214	0.7006830959396644	1.811917890028431	2.260079615700337	1.1298205985188157	67.0	99.0	2.000388042724022	0.010103837237431286	Simulations
0.9238631419451319	0.91500949117413	1.6929185969688594	1.7326523822968376	0.8087892403517057	93.0	95.0	2.142279219173818	0.011569963468540539	Simulations
0.9404321055328267	0.6381956414822515	1.6060746854092918	1.862782023700201	0.9223499181673743	71.0	88.0	2.019604476575853	0.011523554321889628	Simulations
1.5454782386336094	0.6401494158695522	1.8898209269836583	2.853485947648877	1.3080077090152677	46.0	100.0	2.1815513226578163	0.011253544146142302	Simulations
1.3711805051162897	0.6550542645404407	1.9088830204391594	2.573660340388148	1.2024798352718584	60.0	97.0	2.1402939699244863	0.01131761819349504	Simulations
1.1999246601909752	0.7842185318088055	1.9317226403491197	2.2995808151137513	1.0996561549227761	80.0	105.0	2.0911816887663766	0.010136365842660396	Simulations
0.9351467530189179	0.6724056647653309	1.9031161982558287	2.1692123355566393	1.2340655825377214	77.0	100.0	1.7577771929234836	0.00813752213236869	Simulations
1.463076702174496	0.7562907998942409	1.655568232934053	2.381766892726707	0.9186901905522111	65.0	101.0	2.5925681118844452	0.013607741504795491	Simulations
1.2670676761491222	0.7248157775412858	1.7800501454253101	2.3124277911599576	1.0453601150108354	87.0	132.0	2.2120872586916986	0.008677335573474875	Simulations
1.0073066590658353	0.5023134355335652	1.8671457115286874	2.3916770644385714	1.3843704053727361	35.0	61.0	1.7276279925925042	0.01293102619176829	Simulations
1.3876451147488995	0.5706669245099254	1.8478033759745105	2.745899737603612	1.3582546228547125	48.0	111.0	2.021638425814753	0.009148873795865566	Simulations
1.281557653515238	0.6321407856092857	1.6776243527203871	2.26058653458101	0.9790288810657721	83.0	124.0	2.3090090377314842	0.009736079193550302	Simulations
1.1287644704842796	0.7504467236234278	1.986427224118827	2.342112605424569	1.2133481349402893	53.0	71.0	1.9302890390479959	0.01336361818318337	Simulations
1.195225292940711	0.6952946808666634	2.2903857327400705	2.741893459627519	1.5466681666868078	49.0	71.0	1.7727742244162563	0.011633926905869896	Simulations
0.960538975876376	0.7038609205745154	1.7205009024620324	2.0098923858034774	1.0493534099271014	63.0	83.0	1.9153627050614956	0.01129659778044599	Simulations
1.190344229155725	0.6438951038604963	1.814467894297914	2.372247021616891	1.1819027924611663	67.0	106.0	2.007142242787142	0.009482479827254869	Simulations
1.0112742681676448	0.6147117323705587	1.5512185379158463	1.9825256946734116	0.9712514265057668	55.0	81.0	2.041207498459865	0.012708924032648315	Simulations
0.7796763203583577	0.9006703963702083	1.8584330250791194	2.02692962027875	1.2472532999203925	76.0	67.0	1.6251146582719977	0.01045584342653627	Simulations
0.9655965152618451	0.7548390912545215	1.8367142617372714	2.0339778719151784	1.0683813566533333	82.0	97.0	1.9037938646613433	0.009576054409660209	Simulations
1.1767961530466726	0.7767614915390844	1.8542649475188486	2.240880518259446	1.0640843652127732	82.0	107.0	2.1059237326650897	0.010041618590780059	Simulations
0.9269325715081799	0.7718494962028231	1.5021905287860406	1.7321828596536526	0.8052502881454727	67.0	82.0	2.1511111329658097	0.013476610496523695	Simulations
1.1564187295098918	0.7968453191166338	2.318908549165175	2.640751748039535	1.4843330185296433	50.0	64.0	1.7790830730528528	0.012986466841006433	Simulations
1.5021430926280617	0.7107863428224437	1.989276847941725	2.6656857455275933	1.1635426528995316	62.0	94.0	2.291008188556511	0.012723219310154108	Simulations
1.0335413018819035	0.5167732202678588	1.4251196646797408	1.957627119718859	0.9240858178369554	60.0	102.0	2.1184473151001875	0.010617718136518819	Simulations
1.1145538413082776	0.7784117089248891	1.6885186533379808	2.0297630285720136	0.915209187263736	96.0	121.0	2.217813213436522	0.009497007151412816	Simulations
0.9642107416252925	0.7571124142160686	1.971118427216884	2.114080502987785	1.1498697613624926	80.0	89.0	1.8385390885336346	0.009871458983142494	Simulations
0.9212623502717051	0.6212464453776656	1.5692715409459308	1.9013950751992121	0.980132724927507	62.0	88.0	1.939936323766604	0.010863742026629842	Simulations
0.7132380873737483	0.6992262795054849	1.4528438287253276	1.5580684389683408	0.8448303515945925	58.0	65.0	1.8442382379225986	0.013585000531482786	Simulations
1.0710966661438714	1.1306366417715534	1.8451011680247895	1.8970814596512566	0.8259847935073851	113.0	116.0	2.2967510716458426	0.010341331912364195	Simulations
1.5737101646631333	0.7549929323287285	2.1461197234441998	2.921488187153221	1.3477780224900877	81.0	131.0	2.1676330511426687	0.008520004198487755	Simulations
1.272265402960092	0.7605971258152577	1.8210894486971527	2.3403404494969577	1.0680750465368658	77.0	112.0	2.1911760386925003	0.010104512453989488	Simulations
0.8639526119257785	0.5100043198795485	1.7036861785150896	2.0620490559448643	1.1980964440190858	51.0	77.0	1.721104395425462	0.0101731767304008	Simulations
1.3156574964742673	0.6662199846232886	1.931549325951504	2.648927683864692	1.3332701873904247	48.0	96.0	1.9867898561876418	0.010317075896256515	Simulations
1.111212834127398	0.9961371692320327	1.9460442596153997	2.073082126429706	0.9618692923023082	73.0	79.0	2.1552638627932748	0.01402360133109618	Simulations
1.2751687138231835	0.5539958409792687	1.7017509296949407	2.4066686975521447	1.1314999837289612	63.0	118.0	2.126971924136268	0.00922712703357712	Simulations
1.203036588015908	0.6415474962245236	1.5961081104275208	2.143933992135913	0.9408974041200052	68.0	105.0	2.2786054916806515	0.011315725371224048	Simulations
1.4406048849864475	0.8763030744461591	2.1185914687657244	2.692112378994005	1.2515074940075575	53.0	79.0	2.151095692102782	0.013988249428951197	Simulations
1.0529417980612996	0.7541325495223505	1.9394324395519873	2.245946679973645	1.1930048819123453	59.0	77.0	1.8825963866748563	0.011853554948600286	Simulations
0.9552905777393971	0.5949026664780389	1.5328051304752242	1.9151560074203597	0.9598654296809627	54.0	82.0	1.9952338611225053	0.012153144566728953	Simulations
0.8312451855772949	0.5874418956752943	1.9868093246256204	2.2156915878353347	1.3844464022580398	45.0	58.0	1.6004170217218445	0.011697377208612306	Simulations
1.4044667903271695	0.5681000193798555	1.8158593945823853	2.6672805285468444	1.262813738219675	47.0	100.0	2.112172561812004	0.010787277058613914	Simulations
0.7136141637749359	0.6357017937615534	1.5638244834234005	1.6716487894854317	0.9580346257104958	62.0	69.0	1.744873039683411	0.011639450246221154	Simulations
0.8049099898833229	0.5655299048561796	1.4379773026556075	1.7094268588395916	0.9045168689562687	58.0	79.0	1.8898783621494166	0.011623966855083401	Simulations
1.0893428925898612	0.7532780939696782	2.1901184045001187	2.4344146038805654	1.3450717112907042	68.0	82.0	1.8098771860606222	0.010437704912111467	Simulations
1.4624477271897547	0.9261553898662851	1.8235595594192748	2.4866863651945796	1.024238638004825	76.0	117.0	2.4278388579819086	0.010937373242103969	Simulations
0.9188260917943094	0.5588718544208011	1.7195731513155703	2.0994713767533444	1.180645284959035	62.0	90.0	1.7782405973240218	0.009227228168061931	Simulations
1.003886055432197	0.7099479145473989	1.8208681082895557	2.062988414060275	1.0591023586280781	62.0	76.0	1.9478649983676686	0.01265649593834404	Simulations
1.7387792334887104	0.6786726958444207	1.8036302479662423	2.901990964201298	1.1632117307125875	52.0	109.0	2.494808887822622	0.012100268841086767	Simulations
1.0663475040354538	0.660978357111665	1.8658948482579072	2.2575334373530556	1.1911859333176018	53.0	74.0	1.8951982005576096	0.012464172079584585	Simulations
1.0439224705493586	0.6659669149028846	1.9016505511923942	2.2686429492521105	1.224720478702752	61.0	87.0	1.85237610434595	0.010222724729959316	Simulations
1.210061543938783	1.0377054067449374	2.5849451560016394	2.6960516618092174	1.4859901178704344	63.0	67.0	1.8143133183637294	0.012827218209601551	Simulations
0.8377476191829963	0.8523019703289699	1.6724475769024245	1.6821370616428322	0.8443894424598358	82.0	80.0	1.9921341706292646	0.012428935205921615	Simulations
1.198668927532388	0.512187895887954	1.3432258230822272	2.1184236353747026	0.9197547078423145	65.0	145.0	2.3032484827877515	0.008301172846157943	Simulations
1.20268430555286	0.7579954487514649	1.588879021832605	2.036683758943389	0.8339994533905289	77.0	106.0	2.4420684577951284	0.0121519211654986	Simulations
0.9400489627342266	0.5925921743276918	1.587091880609317	1.9578341700671662	1.0177852073329396	61.0	90.0	1.9236221512764786	0.010486949384787241	Simulations
1.3086851258958763	0.70861768438838	1.8354008547628171	2.412175875120148	1.1034907492242716	66.0	100.0	2.185950246357617	0.011282605647106418	Simulations
0.4505267016749652	0.5104156210324127	2.1048331911605165	1.8626183668549892	1.412091665180024	40.0	35.0	1.3190491897829655	0.011414239038799977	Simulations
0.9235119413539064	0.7774422994044066	1.7960267402925074	1.9450450597939641	1.0215331184400578	62.0	70.0	1.9040450325919578	0.01327239428924458	Simulations
0.8841838398954744	0.6086894790685742	1.6942403113008366	2.0018424530448518	1.1176586131493773	55.0	76.0	1.7911036782546599	0.011063800662094872	Simulations
0.9185146889549918	0.6271974527361663	1.5288448426436434	1.9327485534896989	1.014233864534707	39.0	64.0	1.9056241573794939	0.014535368864228416	Simulations
1.3747863124515356	0.5785212798275537	1.6117282347862338	2.4107744063614946	1.035988093909959	59.0	115.0	2.327029065809923	0.010595558529315673	Simulations
1.197802986077392	0.4680148969337832	1.637395108879802	2.378110351925985	1.1803073658485932	40.0	88.0	2.0148229357326937	0.011484693853615986	Simulations
0.7426669528587648	1.0147927784800461	2.32003167179916	1.9234304729898988	1.180763520131134	76.0	59.0	1.6289717968050752	0.011931552982820327	Simulations
0.9164386042065098	0.6321424734501082	1.7400990328893378	2.0228739065290933	1.1064353023225835	60.0	80.0	1.8282803362137483	0.010881091256431878	Simulations
1.3113867610743173	0.6878461629727792	1.844879476355103	2.4591932191997348	1.1478064581254175	57.0	92.0	2.1425155798618323	0.011948974949020152	Simulations
1.2692165496308654	0.78596065593789	2.0087511268504326	2.414216676169067	1.1450001265382017	70.0	95.0	2.108485947043709	0.011328499012176923	Simulations
0.7929920051285801	0.6707627550447068	1.7070192429074804	1.7792022852003218	0.9862102800717416	64.0	68.0	1.8040800437315399	0.012518578672843207	Simulations
0.9852950406388803	0.49714582823616005	1.8230906908730795	2.285777720702037	1.3004826800631568	44.0	72.0	1.757637956847707	0.011300526815946193	Simulations
1.1779385619547789	0.6641943732356854	1.711428381081638	2.259380902281569	1.0814423403267903	59.0	92.0	2.0892291877520064	0.01155403004626037	Simulations
1.0399542648833924	0.8799518064471894	1.8272277721260937	2.0166465089429906	0.9766922440595981	106.0	122.0	2.064771703889904	0.008573625210268027	Simulations
0.8329539044926133	0.8485959831793247	1.645141736573907	1.71829296200129	0.8853390575086766	69.0	73.0	1.9408304055132575	0.01310512407333721	Simulations
1.1546118017074598	0.6486599961748467	1.7147971246455238	2.192332828023522	1.0377210263160623	63.0	91.0	2.1126418106862137	0.011857672365712385	Simulations
1.0139334990675946	0.6171470693819723	1.970179614100944	2.4086439006288667	1.3947104015612721	47.0	77.0	1.7269849697346296	0.010237084764717398	Simulations
0.8491243608718434	0.641595737446425	1.3749185470375702	1.6067423752006327	0.7576180143287893	61.0	77.0	2.1207816403681004	0.014085663453814694	Simulations
1.1921117707924946	0.5570600108126131	1.5762629457997899	2.2295137117950388	1.0374019410025441	47.0	84.0	2.149132003397294	0.013139929741748217	Simulations
0.7386741474128259	0.8534515388616222	1.6034811629707153	1.6737467445926324	0.9350725971798065	89.0	79.0	1.7899644900734752	0.010632037558186879	Simulations
0.9017072661417669	0.6648478353612386	1.674266605335022	1.9213852452799784	1.0196779791382116	71.0	89.0	1.8843059128371602	0.010270035980540418	Simulations
0.7624305219798115	0.68731246292285	1.8700872843686467	2.007329231927795	1.2448987099479836	56.0	65.0	1.6124438204387477	0.010603829170926966	Simulations
1.0864006346881199	0.6505493797054682	1.8890789514156079	2.23547301387498	1.1490723791868602	65.0	85.0	1.945458836506809	0.011295417117624936	Simulations
1.1148076949697208	0.7144621477128184	1.5622383111723677	1.9919327025908793	0.8771250076211585	83.0	115.0	2.2709792621158744	0.01028969158137022	Simulations
0.989075407568146	0.8422421686370378	2.12314819552772	2.267077941661891	1.278002534093745	60.0	67.0	1.7739228844874846	0.012342437231939729	Simulations
1.154591529707589	0.8558781084743792	1.9883980986259864	2.2859991685732943	1.1314076388657053	67.0	83.0	2.020491191720366	0.012225374242686477	Simulations
0.7183542286949038	0.4876762496472724	1.6227672433934304	1.8368013513968935	1.1184471227019896	50.0	66.0	1.6422782213963543	0.010843917537287143	Simulations
1.1725896186504878	0.7727386942386794	1.8750908066351095	2.339895370437197	1.1673057517867094	44.0	68.0	2.0045265491544875	0.014753845963757534	Simulations
0.5329735050625826	0.4701269037851561	1.7568579887149398	1.8274438689688886	1.294470363906306	37.0	41.0	1.4117309441169712	0.012133296526995017	Simulations
1.44476657141097	0.576788466437046	1.8095675445485264	2.6562101119112302	1.2114435405002602	43.0	83.0	2.192599178674361	0.013646290386995684	Simulations
0.9995190325072562	0.6538739053769866	1.5800232338299889	1.9643073518677563	0.9647883193605001	63.0	90.0	2.035998272833337	0.01139707041727936	Simulations
0.8432420979038787	0.8432420979038787	1.9562586957059749	1.7509860953938516	0.9077439974899729	90.0	89.0	1.9289426316621756	0.01064955322572873	Simulations
1.3502506194121782	0.935042198902587	2.143933462374413	2.557761041258883	1.207510421846705	72.0	95.0	2.1182103234746195	0.0113983773260296	Simulations
0.7005156578375771	0.5417089957811922	1.908890699027254	2.01076205598214	1.310246398144563	48.0	54.0	1.5346442156449167	0.01144267087127274	Simulations
1.8105799318552402	0.5447540524196008	1.637484917524822	2.9105687064336414	1.0999887745784012	54.0	134.0	2.645998553529959	0.010476210992153097	Simulations
1.1506710306925276	0.5146080445355159	1.7742862076871748	2.379672872841574	1.2290018421490463	46.0	86.0	1.936264691581301	0.01108460680969607	Simulations
1.2939594440906235	0.6494985823167998	1.8353092053779496	2.4766798975771525	1.182720453486529	47.0	77.0	2.094053493601277	0.01384802983216264	Simulations
1.4591095780642585	0.5208586185570259	1.6407374532506385	2.569528191703557	1.1104186136392986	50.0	102.0	2.314017578723898	0.011866664942159941	Simulations
0.8402031613711227	0.5451065401845614	1.682264747955228	1.9818879483974	1.1416847870262772	60.0	83.0	1.735932694311871	0.009586879669961105	Simulations
1.304417472426025	0.718712315282398	2.0402202817041646	2.5871944409680574	1.2827769685420325	70.0	105.0	2.016870043986359	0.009639220262966298	Simulations
0.9295749289988781	0.8127458949793899	1.5806089708672786	1.7316271921294024	0.8020522631305244	88.0	99.0	2.1589954566933263	0.011215759670827023	Simulations
0.9809221718274843	0.6445409084779608	2.145364360734603	2.5124489547971454	1.531526782969661	42.0	63.0	1.6404864627476228	0.011335296647981512	Simulations
1.018091591230922	0.7702402577923977	1.8420616695385377	2.1318482965176146	1.1137567052866926	45.0	60.0	1.9141059141537151	0.015611177689652877	Simulations
1.0439478538722562	0.5578487820519928	1.6024307441396373	2.0865633706246776	1.0426155167524214	48.0	76.0	2.0012778796195025	0.013170019749137878	Simulations
1.4512237901822083	0.7372685835595609	2.151349885288322	2.769335884703817	1.318112094521609	79.0	115.0	2.100986627930844	0.009313625911080745	Simulations
1.1261130511685387	0.6179045723084418	1.7309066476707209	2.256081307560327	1.1299682563917883	61.0	99.0	1.9965882181190115	0.01007612947517286	Simulations
0.9614258656196404	1.0649744395330205	2.326141597440907	2.1215434887330913	1.160117623113451	83.0	76.0	1.8287313686688302	0.011458462711725884	Simulations
0.9755988980757535	0.7608008546457594	1.84221229003177	2.0660667657121685	1.090467867636415	76.0	91.0	1.894660839654414	0.010131204580998112	Simulations
1.5879295316702677	0.6808375333108367	1.9362716474540518	2.8501838153048062	1.2622542836345385	48.0	93.0	2.2580108083277635	0.012634971955017706	Simulations
0.9323734449116496	0.9076854582450651	2.059604013786284	2.1800277299509507	1.247654285039301	49.0	49.0	1.7473011202636795	0.016431188894042274	Simulations
1.015211511750437	1.0484730289500803	1.9306073675213118	2.049403894484016	1.034192382733579	90.0	98.0	1.9816466729981401	0.010068364830253643	Simulations
1.3987224701863048	0.5729116359938973	1.691086553193892	2.443892595282231	1.0451701250959262	78.0	125.0	2.3382725324816658	0.009803544719865635	Simulations
1.219530624978732	0.7995607245111074	1.9202045484107912	2.337742585772669	1.118211960793937	78.0	103.0	2.09060774498679	0.01032934367372809	Simulations
1.362162433387347	0.6912485460037479	2.568868034351523	3.1389792773062686	1.7768168439189216	47.0	73.0	1.7666307520942797	0.011246582604169983	Simulations
0.79200844492799	0.7920084449279898	1.9369886755212373	1.82027188451547	1.02826343958748	75.0	74.0	1.7702388458406428	0.01113437873116842	Simulations
1.091044789692746	0.8062179766654924	1.9611697177623002	2.204991235567579	1.113946445874833	59.0	70.0	1.9794409719902637	0.014072757800803358	Simulations
0.4245020267543045	0.7873118839782576	2.2012792051703833	1.6349566424392232	1.2104546156849187	71.0	42.0	1.3506963592468983	0.010326271161163822	Simulations
0.9909970123852616	0.5425900251695956	1.6632293843290644	2.1274887007714702	1.1364916883862086	50.0	81.0	1.8719791112528539	0.011167460944343214	Simulations
1.169811333235906	0.9134528689095602	2.106066608455032	2.416478399501924	1.2466670662660182	74.0	92.0	1.9383510360466099	0.010378585510735552	Simulations
0.7039622546562274	0.729283717949456	1.6759950392518275	1.7048016726379558	1.0008394179817284	59.0	60.0	1.7033718316928632	0.012806556625738581	Simulations
1.3416191385189422	0.5712159521610541	1.3975688990093411	2.2160191102065996	0.8743999716876574	71.0	141.0	2.534331177904223	0.009514929527307713	Simulations
0.7484234935762071	0.5744011808983096	1.559758113574819	1.7872162875304474	1.0387927939542403	59.0	78.0	1.7204742831602429	0.010035978557816254	Simulations
1.4009837801965306	0.8412808396368971	1.8369212826028707	2.458588459526038	1.0576046793295073	64.0	96.0	2.324676230711003	0.012677393738079013	Simulations
1.1672396073937923	0.7473264748803159	1.908197724359751	2.3800346312528124	1.2127950238590202	56.0	81.0	1.9624376621201214	0.012007985515482048	Simulations
0.8987208660554131	0.5576315676371466	1.6882566302887279	2.0539229113014708	1.1552020452460576	44.0	68.0	1.777977211652171	0.01220936519489056	Simulations
1.804556510607628	0.6653377750356142	1.5774914559687268	2.7186715921797284	0.9141150815721005	71.0	144.0	2.974102109226927	0.01091982069436344	Simulations
0.7961396232754197	0.6027382488214352	1.8250874233473542	2.0502400126749016	1.254100389399482	44.0	58.0	1.6348292608828916	0.012226551218683119	Simulations
1.1434311329500084	0.693479311242648	2.1272519753717827	2.570022601550145	1.4265914686001366	61.0	87.0	1.8015126671632324	0.009761020643355576	Simulations
1.1823069396367605	0.5314461870457294	1.46402329760983	2.098696828024648	0.9163898883878875	65.0	114.0	2.290178945248593	0.010486494114358523	Simulations
0.9463992538394925	0.6667687922171699	1.7858641687592962	2.120426609176979	1.1740273553374863	54.0	78.0	1.8061134602502003	0.010934468281152772	Simulations
1.1058469162339533	0.5476675239481534	1.9462160053047168	2.441173538813623	1.3353266225796698	41.0	67.0	1.8281471345921398	0.012990778915771117	Simulations
1.092343117817105	0.5255562593653702	1.4462522798211324	2.0652544725512447	0.9729113547341397	44.0	84.0	2.122757086246158	0.012927848673433068	Simulations
1.6352309722123144	0.6484262177564304	1.8240848812635369	2.7862562366135233	1.151025264401209	55.0	102.0	2.4206733968285232	0.012504004318881127	Simulations
1.2325097869994326	0.6502336025788518	2.0374001007232514	2.515066688313963	1.2825569013145306	59.0	83.0	1.9609786401961555	0.011705708688851539	Simulations
0.9428029157538826	0.5837459038972437	1.7032888621264948	2.128352336106523	1.1855494203526404	40.0	64.0	1.7952455625792865	0.013190331195608224	Simulations
1.1415219142400308	0.6380624095686888	1.865065653448514	2.275288928307734	1.1337670140677032	50.0	69.0	2.0068399416071427	0.014564138508409588	Simulations
1.421966378027158	0.7062809655326929	2.0521131377181367	2.6616023990021547	1.2396360209749966	70.0	103.0	2.1470837842456008	0.010702703782909872	Simulations
1.5225065335976278	0.8176080511682284	1.7494657813936056	2.467549855178744	0.9450433215811161	63.0	98.0	2.6110441699650124	0.014128845544269547	Simulations
1.1216649230936795	0.6849811129880956	1.838349490066248	2.2362516793414677	1.1145867562477882	58.0	82.0	2.006350485331191	0.012250898164151517	Simulations
1.4781946641842072	0.6143343722071588	1.844489485871819	2.6790453086958737	1.2008506445116665	61.0	119.0	2.230956298304128	0.009728254228853678	Simulations
1.1015611962424843	0.6268858680639573	1.5861964235430914	2.066279458909669	0.9647182626671847	70.0	108.0	2.1418475619990502	0.01017459078991157	Simulations
1.0394926478507696	0.6240362839780385	1.99323813131584	2.3257660624015846	1.286273414550815	67.0	89.0	1.8081428381335045	0.009601220798353781	Simulations
1.3268363578173392	0.4669012191031001	1.6927033692708275	2.470600034865655	1.1437636770483157	55.0	98.0	2.160061631998557	0.011337474252030666	Simulations
0.792204108160149	0.6191544407738929	1.5722307785553906	1.7792181578275188	0.9870140496673698	52.0	67.0	1.8026269822877667	0.012688072995233625	Simulations
1.4344580859345502	0.5221244022922731	1.450168841307426	2.327416120502661	0.892958034568111	63.0	125.0	2.606411533805552	0.01105651914525009	Simulations
1.0600061802950742	0.6653755778057842	1.6575650938385855	2.108557790701606	1.048551610406532	52.0	80.0	2.0109241832017224	0.012598233618869857	Simulations
0.8980232512254798	0.6182087351366565	1.6552530443083042	2.0102624645259435	1.1122392133004637	47.0	70.0	1.8074011781698305	0.012198810974981213	Simulations
1.2256882949070949	0.45079447977465303	1.6330458609295693	2.418323677043871	1.1926353821367763	44.0	101.0	2.027714180935249	0.010097567423108534	Simulations
1.2279005653330364	0.7182349176724949	1.826930069466847	2.3594696367858146	1.1315690714527782	74.0	112.0	2.0851309003670293	0.009465517464603761	Simulations
0.9897668761712937	0.8121405617940565	1.741138983302591	1.930265207655943	0.9404983314846493	76.0	88.0	2.052385573729695	0.011787520340199269	Simulations
0.9250958011686707	0.6222596749872356	1.7949358086413294	2.0539706522362065	1.1288748510675357	63.0	80.0	1.8194848173770914	0.010794125158938437	Simulations
1.115211277943914	0.6010761362377428	1.8311156547027487	2.303912023534654	1.1887007455907401	61.0	93.0	1.9381766454514129	0.010265592085968169	Simulations
1.3088852144541296	0.6552384125746032	1.571661993049107	2.2429615367430267	0.9340763222888971	66.0	114.0	2.40126152780191	0.011085899472745433	Simulations
1.4973823532728903	0.553362943959073	1.7847714571641369	2.702097837964648	1.2047154846917578	43.0	86.0	2.242934429166082	0.013551016799094718	Simulations
1.2068737611900247	0.6983442334236281	1.6876024934355947	2.241971029242534	1.0350972680525095	71.0	112.0	2.1659520302480417	0.009955368675520803	Simulations
0.8101008258563633	0.6973716917284807	2.0588244128443276	2.14903031738204	1.3389294915256766	48.0	52.0	1.6050362106321774	0.013127035496681462	Simulations
1.5074726879463076	0.7452995849283658	1.938051550862764	2.6685646554109863	1.1610919674646787	62.0	108.0	2.2983232424197837	0.01111649737778464	Simulations
0.8491176170354973	0.5665636579995266	1.7861883674378938	2.0833934456024505	1.2342758285669533	49.0	69.0	1.687948023758481	0.010945948992098966	Simulations
1.739709913208148	0.8063653135724203	2.1278528260566336	3.0146237922556316	1.2749138790474837	48.0	76.0	2.3645705343704657	0.016336554967917524	Simulations
1.3648229500349962	0.7063696467511791	2.1141004298267188	2.8034698173810866	1.4386468673460904	44.0	80.0	1.9486851714713846	0.012031262854835505	Simulations
1.1760841575922412	0.5634959725470441	1.7379177314351406	2.3657287007859544	1.1896445431937133	56.0	102.0	1.9886013131577371	0.009723079067818777	Simulations
1.0525501062901146	0.7750105831950926	2.3574782530590626	2.583914197293978	1.5313640910038635	52.0	62.0	1.6873284495002954	0.01217323920922051	Simulations
1.1976118179157988	0.47378187374763003	1.4182146123784138	2.196121560376502	0.998509742460703	45.0	103.0	2.199399231663412	0.011039898095265666	Simulations
1.112158722302988	0.5580064431951375	1.5799645543794971	2.1697858579968448	1.0576271356938567	60.0	106.0	2.0515603134306457	0.009780392154438267	Simulations
0.9607508697067045	0.7992024347736089	1.6733963302344228	1.8918539689138363	0.9311030992071317	63.0	75.0	2.0318415549522055	0.013637172049149927	Simulations
1.3381876792502512	0.8453169326415491	2.0484095210726085	2.5240136760682645	1.1858259968180134	85.0	115.0	2.1284856992856267	0.009476759974591603	Simulations
1.0056986091685391	0.6551475461538296	1.69023415872852	2.070207288660892	1.0645086794923528	58.0	80.0	1.9447537897465905	0.011994843978731873	Simulations
1.7056968213006234	0.5495750477688404	1.695238290603362	2.8707898390709734	1.16509301777035	57.0	139.0	2.4640005521317363	0.009359730786410595	Simulations
0.8479449291977987	0.7091302109875142	1.962182162175395	2.0573906184864987	1.2094456892887	48.0	52.0	1.7011021137265723	0.01473980280138857	Simulations
0.9777024681344374	0.5569661297854469	1.18154731584564	1.6894715797933957	0.7117691116589583	63.0	109.0	2.37362306416424	0.011441200462985412	Simulations
0.8490744244271915	0.5775084810732951	1.667697574177259	1.9384127348375912	1.0893383104103997	51.0	66.0	1.7794405248699179	0.012597328996000978	Simulations
1.0185750434943102	0.6834534597139696	1.64056018850363	2.037652252768963	1.019077209274653	65.0	93.0	1.9995072348044167	0.010748865604858639	Simulations
1.0698650320271765	0.7338114955437611	1.6394529746478907	2.0430582197682443	0.9731931877410679	73.0	108.0	2.099334690690241	0.009906779532860935	Simulations
1.1906759331592203	0.7590727892434681	1.6809292536575138	2.0903168324902888	0.8996408993310685	74.0	100.0	2.323501337082998	0.01216300475062735	Simulations
0.7721310490447972	0.5563289994812533	1.6306167563805063	1.8779796030798201	1.105848554035023	53.0	72.0	1.6982249479166416	0.010611494053018911	Simulations
1.6156635476647148	0.6043304638855769	2.0137306899257985	2.941932867691001	1.326269320026286	56.0	99.0	2.218201705542501	0.011610005642689563	Simulations
1.146093502873462	0.6884085875077002	2.008700897060153	2.4567268223063325	1.3106333194328705	56.0	82.0	1.8744577799757087	0.011054552816232662	Simulations
1.4652805949618457	0.7348392142480462	2.1883858428878193	2.8296578450474863	1.3643772500856406	44.0	70.0	2.0739556049251564	0.015034071602353203	Simulations
1.3828300671599616	0.7697032387761984	1.8526956383699051	2.4294530580698375	1.0466229909098759	84.0	120.0	2.321230356269745	0.010124080843397514	Simulations
1.1856803965219362	0.586489975456969	2.3290689944484213	2.937440583004592	1.751760186482656	40.0	73.0	1.6768508644454658	0.010215813484586932	Simulations
1.129953722468321	0.6016951744835604	1.791969859928035	2.3192380012262186	1.1892842787578977	57.0	94.0	1.950112384945051	0.010250609243217957	Simulations
1.325161015147075	0.6015323786101432	1.7825090752390924	2.477194161024902	1.1520331458778272	51.0	88.0	2.1502802848066733	0.012551417324244378	Simulations
0.9179002694102745	0.6568865288885766	1.696913197804177	1.997551546306633	1.0796512768963584	53.0	70.0	1.850182173681983	0.012680961845560395	Simulations
1.1055432471087165	0.5668967959013664	1.425241322085128	1.9671674223565605	0.8616241752478441	67.0	108.0	2.283092186672582	0.011027676980222995	Simulations
1.1984765342909554	0.6077083051880086	1.5112888907353954	2.120803217857387	0.9223266835664314	60.0	101.0	2.2994056830891134	0.011893673490457252	Simulations
1.2074557103129056	0.8130652385819297	1.800701025030958	2.280770484661127	1.0733147743482216	69.0	103.0	2.1249781882916334	0.010557747891956501	Simulations
0.9315799428507927	0.5777699635265513	1.3174913152389325	1.7126600751182561	0.7810801322674634	71.0	104.0	2.192681652452778	0.010891311226168493	Simulations
1.1107539859544415	0.570741924108467	1.3848694782060824	2.006487398349632	0.8957334123951902	62.0	115.0	2.2400497408981166	0.01011765885273273	Simulations
1.6753845102497649	0.7885302536202412	1.5332731848747376	2.486737169710612	0.8113526594608471	77.0	135.0	3.064927612812752	0.01196928148796669	Simulations
1.5428979985122628	0.6544140509427516	1.6870253094173389	2.642707011818093	1.09980901330583	57.0	122.0	2.4028781177875476	0.010366913703993971	Simulations
1.1040131179824408	0.4811271101884953	1.7802547134839317	2.369459754009222	1.2654466360267813	42.0	78.0	1.8724296122425157	0.011601429312646065	Simulations
0.9247548099710562	0.7508063385160513	1.6002224253753705	1.8473805821847131	0.9226257722136569	66.0	83.0	2.002307585395421	0.01206823628260572	Simulations
1.0529328659682076	0.7683541625348183	1.8959507869083598	2.1881887218584257	1.1352558558902182	52.0	67.0	1.927485077927692	0.014130144645158611	Simulations
0.7200330333225453	0.5431945011696531	1.5844132590632178	1.7293003688881443	1.009267335565599	61.0	72.0	1.7134215167273148	0.010790001537834128	Simulations
1.016161761038362	0.558926579931766	1.3628844482487545	1.9041041269802639	0.8879423659419018	46.0	85.0	2.1444005827567976	0.012947934497368838	Simulations
1.4106120096541959	0.4992796041466905	1.6442081235596135	2.5512842452354323	1.1406722355812364	38.0	82.0	2.23664972781196	0.014162674875128513	Simulations
1.193446433077481	0.4945039339523689	1.8238987023711677	2.4440867404260374	1.2506403073485564	47.0	80.0	1.9542683264444511	0.012082857086554384	Simulations
1.2702778674332145	0.6549325549095768	1.9179682211645972	2.5048544753470106	1.234576607913796	58.0	94.0	2.028917816270427	0.010858621576588892	Simulations
1.6166820605322043	0.5699568631380838	1.8380393029177937	2.850649698107357	1.2339676375751527	44.0	90.0	2.310149481480014	0.013422068958653586	Simulations
1.634063810731341	0.5251377561347423	1.9300991721509335	3.0299140206403004	1.3958502099089594	41.0	94.0	2.170658426764802	0.011895028961363897	Simulations
1.0069010847650415	0.7289467349695469	1.6668997500020004	1.980546554796388	0.9736454700313466	63.0	83.0	2.0341557741059733	0.012342532095393	Simulations
1.1689319286265913	0.8820638329280297	1.979234153871124	2.281010882314707	1.1120789536881155	68.0	85.0	2.051123146202819	0.012193107194774167	Simulations
1.4199980421814729	0.6743176780207911	1.857423634596424	2.52112824755451	1.101130205373037	80.0	120.0	2.2895823175610834	0.009959036960748294	Simulations
1.0983010287353785	0.63258003413372	2.0333714210997758	2.4623528103637624	1.364051781628384	71.0	102.0	1.805175465864092	0.008354304667951526	Simulations
0.8310722425837225	1.031887321896086	1.8691579706734556	1.8271044874990943	0.9960322449153718	76.0	64.0	1.8343828694565354	0.013676481052523953	Simulations
1.2007919706934937	0.6944488493697791	1.576279291652942	2.0988734372496363	0.8980814665561424	75.0	111.0	2.3370635242013735	0.011033305845427947	Simulations
1.3221861652361386	0.656784006970355	1.718511084204295	2.39830668512638	1.0761205198902413	54.0	92.0	2.228659932412584	0.012567135814194247	Simulations
0.986540352002008	0.8683892858300535	2.0637314263456084	2.1825833064389655	1.1960429544369575	57.0	62.0	1.824836890968039	0.013996250284390157	Simulations
1.1465974723343473	0.8172027873030037	1.9491442743395588	2.286209615443896	1.1396121431095485	66.0	86.0	2.006129567210243	0.011679241702051217	Simulations
0.8923596009518658	0.7255824453387987	1.6942501916095325	1.866175852053027	0.9738162511011611	69.0	80.0	1.9163531620496304	0.011729543222890887	Simulations
1.1072974694363729	0.6732258951831898	2.0603533356943804	2.4301007921577695	1.3228033227213967	76.0	100.0	1.8370839794674354	0.0087741757854067	Simulations
0.9875132385231634	0.6087387349661463	1.509211898648045	1.908957182455761	0.9214439439325975	70.0	100.0	2.071701914181118	0.010508164364850253	Simulations
1.514654032603	0.725649580160594	2.2617833012354835	3.0340453207985623	1.5193912881955622	50.0	94.0	1.9968821358728546	0.010614352995213601	Simulations
1.059865136810339	0.583611036168427	1.628081065550306	2.1113012582598008	1.0514361214494619	66.0	103.0	2.0080166690005448	0.009764769373555712	Simulations
0.8304424455552777	0.8304424455552772	1.8846175030759162	1.8472833558228308	1.016840910267553	63.0	62.0	1.8166886650309635	0.013892116111821841	Simulations
0.6799544693754733	0.8067698881348677	2.0259686066031706	1.7743678201896917	1.0944133508142184	65.0	56.0	1.62129584664661	0.01244906020118193	Simulations
0.7129205098578384	0.7129205098578382	1.895791229709519	1.7223595105045195	1.0094390006466811	55.0	54.0	1.7062541762316665	0.014274677355194982	Simulations
1.2625964121081845	0.6049791893026017	1.759565592843646	2.4141347092636583	1.1515382971554737	46.0	80.0	2.0964432665652946	0.013349297360654717	Simulations
1.3584074522671334	0.7177193387634424	2.1684912513238035	2.7849253890885435	1.42651793682141	40.0	69.0	1.9522540286412091	0.013987547675208968	Simulations
1.226386015047261	0.9596097154764023	2.235834622755659	2.486411402204387	1.260025387157126	64.0	76.0	1.9733026235401794	0.012902792410105468	Simulations
0.3484165673453472	0.6423664384625831	1.85005335392794	1.4752243299193672	1.12680776257402	73.0	43.0	1.3092067510694485	0.009039370858862278	Simulations
1.1389407937095328	0.6465641202074688	1.9014003688632581	2.44387186095224	1.304931067242707	53.0	85.0	1.8727976690110473	0.01064935345770079	Simulations
0.7817079938755813	0.8165227713728098	1.9897177017473195	1.8119682930132626	1.0302602991376812	93.0	89.0	1.758748050885649	0.009152233984391292	Simulations
1.4415611624895415	0.5983299582486274	1.8339232511952703	2.691039191372655	1.2494780288831135	47.0	92.0	2.153730701273817	0.012030846403156116	Simulations
1.114449772388739	0.7521420508408734	1.8606963179319833	2.273342343496919	1.15889257110818	60.0	86.0	1.9616506311047082	0.01130311768888615	Simulations
1.4049364157148785	0.7102455833927286	1.8862798271062193	2.549901192019865	1.1449647763049866	57.0	91.0	2.2270564516830538	0.012693825584494564	Simulations
1.0821895965247128	0.6169766534108286	1.9549079125293514	2.2884245285948177	1.206234932070105	48.0	63.0	1.8971632040762498	0.014664187180855881	Simulations
1.131233106379132	0.8600657912346343	1.9672641511004376	2.2625868433731227	1.1313537369939906	65.0	82.0	1.9998933749799785	0.012194183954340075	Simulations
1.4728928052527546	0.6931398152806918	1.9276161043003182	2.625813694567726	1.1529208893149714	59.0	93.0	2.277531545228485	0.012768505767627497	Simulations
0.9369208634152921	0.7257386417192766	1.8008601752688664	2.0160889039884666	1.0791680405731745	57.0	69.0	1.8681881117584513	0.013067242468626094	Simulations
1.270286169490464	0.6624925880107794	1.5656164971680846	2.2017253216840706	0.9314391521936067	49.0	79.0	2.363788677444842	0.01571014005616262	Simulations
1.1285312008702466	0.5150880199873964	2.022845170562147	2.6466964695461437	1.518165268675897	34.0	66.0	1.7433520079500444	0.0121494530279156	Simulations
0.7199523924402877	0.9849577606534556	1.908666862047724	1.90123738778875	1.1812849953484623	80.0	62.0	1.609465450992131	0.011073896904141753	Simulations
1.1723148060868518	0.7204571370800286	1.4703393942026897	1.9557705367303404	0.7834557306434886	85.0	124.0	2.496338287198404	0.010643656870209479	Simulations
1.6111214763951676	0.6267206642450063	2.0918460881858496	3.0276374254834026	1.416515949088235	43.0	79.0	2.137383223557909	0.013871463293216554	Simulations
1.2479205173320713	0.7669255625358762	1.977488148524566	2.5600103782105053	1.312089860878434	43.0	73.0	1.9510937890310336	0.013209357944238212	Simulations
0.9188882121061279	0.9188882121061284	1.9015914777284595	1.9568702867681484	1.0379820746620205	63.0	62.0	1.8852640469781996	0.014754299986086915	Simulations
1.345512001513337	0.7980564093107145	2.037746241677774	2.598475946030929	1.2529639445175917	60.0	92.0	2.073863304208149	0.011438269609393576	Simulations
1.2933168225546063	0.6806236703182864	1.6665255757215842	2.373917576212324	1.0806007536577178	52.0	95.0	2.1968498246710153	0.011951960540726992	Simulations
0.8305704013503382	0.6898430066065258	1.6458687554083573	1.819159099553805	0.9885886982034667	89.0	105.0	1.8401576943573292	0.008379327666036676	Simulations
1.0257972379422449	0.7972455003574088	1.9571103010008382	2.195906501218032	1.170109263275787	68.0	82.0	1.876667906269255	0.011075285055286646	Simulations
0.9733438578775531	0.577793545641984	1.8149391332106983	2.2751325980159582	1.3017887401384052	36.0	61.0	1.747697247538082	0.013204185071397414	Simulations
0.8208812703693465	0.7238477621545873	1.4637393853862426	1.6049316491288605	0.784050378759514	105.0	119.0	2.0469751595147554	0.008684820126486838	Simulations
1.3189682814370245	0.7481081797023623	1.526724524418532	2.1564395781247088	0.8374712966876843	87.0	139.0	2.574941477581056	0.009816831968146391	Simulations
1.0716918156239195	0.9056783810483686	2.0663790635176604	2.278088277628636	1.2063964620047165	76.0	89.0	1.8883413118130725	0.010304714055119782	Simulations
1.192444283562073	0.5676192060135568	1.826309130094333	2.3717481031871936	1.1793038196251207	67.0	104.0	2.011142560312515	0.00969245529850632	Simulations
1.0865059437709725	0.6889204250529408	1.8974948623357193	2.358837515601307	1.2723315718303343	59.0	93.0	1.8539487408993245	0.00957635866673374	Simulations
1.337642462194617	0.7204491122034482	1.6835264032605222	2.365502309129382	1.0278598469347648	61.0	104.0	2.301386046145952	0.011562528931072326	Simulations
1.0717457742059313	0.5527706590698463	1.6404732574576755	2.091092993051785	1.0193472188458537	78.0	112.0	2.0514040303356156	0.009255461277054688	Simulations
0.43162690661984504	0.5539328314528356	1.642890308890403	1.7333985815033663	1.3017716748835213	53.0	42.0	1.3315688265059737	0.009836357164403889	Simulations
1.083164801521892	0.6422920179111138	1.6866713550703938	2.0915243940802406	1.0083595925583486	65.0	93.0	2.074185052153619	0.011317684005683084	Simulations
1.1428617170237716	0.5607033193675406	1.7648922634305506	2.410293128248023	1.2674314112242515	39.0	75.0	1.9017148438193163	0.01236401246421112	Simulations
1.096196336637609	0.6913053306407779	1.9041695862405876	2.3184091868509378	1.2222128502133287	66.0	95.0	1.8968947891901773	0.00972252276039548	Simulations
0.9906705121713255	1.2615526525528216	2.280085547810258	2.27384394562085	1.2831734334495244	74.0	61.0	1.772047243456506	0.013531427331256002	Simulations
1.2780114585859772	0.5256674769199754	1.489410977566586	2.294875533725839	1.0168640751398617	59.0	129.0	2.2568164121740626	0.009103015990228173	Simulations
1.3851951040202992	0.540108101049263	1.504217598508126	2.361510745751438	0.9763156417311387	53.0	112.0	2.418798434453188	0.011377594199377249	Simulations
0.5998714164166832	0.8718058961164581	1.874831992080165	1.830676651559606	1.2308052351429228	59.0	43.0	1.48738126820449	0.01332033740342176	Simulations
1.3338837632452316	0.7634970757940531	2.1895006539286967	2.7517078597192146	1.417824096473983	50.0	77.0	1.9407963699887	0.012424009833728471	Simulations
1.1975477120100335	0.7165529394684171	1.5128782053883274	2.045717413098231	0.8481697010881974	65.0	97.0	2.4119199382783725	0.013094659989110602	Simulations
1.1097709698913694	0.5468464062586642	1.536181380636662	2.183086052072638	1.0733150821812687	41.0	85.0	2.033965690332062	0.012050533452936581	Simulations
0.7542297909741291	0.8317475403786141	1.7816009906783976	1.8186070467448336	1.0643772557707045	84.0	77.0	1.708611337648322	0.010036678709962764	Simulations
1.4422076918191824	0.6746324375996676	1.5917625619390425	2.345890580102987	0.9036828882838044	60.0	100.0	2.5959223202268413	0.01376247213113535	Simulations
0.8181369563936434	0.8007167220522875	1.7165495690356314	1.825739653887312	1.0076026974936687	62.0	62.0	1.8119638409352157	0.013831518800577884	Simulations
1.294802250834269	0.615519748937507	1.7960816023968902	2.4385137840110147	1.1437115331767458	70.0	117.0	2.132105616910111	0.009335717143893519	Simulations
1.0763054138023767	0.6194476040457451	1.7364827282311048	2.1673996893624374	1.0910942755600608	68.0	97.0	1.986445844241926	0.010208138786458877	Simulations
1.1402431032790838	0.6400533374888959	2.09522459807739	2.5450752511346404	1.4048321478555565	55.0	78.0	1.8116578945176036	0.010991160883821717	Simulations
0.9668898167768236	0.7030102722392904	1.7830665803469834	2.1104732110214197	1.143583394244596	51.0	68.0	1.8454913053503292	0.013000072656484597	Simulations
1.363238401370158	0.6752750265434024	1.767237005023223	2.505290045091941	1.142051643721783	53.0	98.0	2.1936749172984498	0.011564793339561895	Simulations
1.4642942006274282	0.6824610497289207	2.27455887539985	3.002174552732623	1.5378803521051947	51.0	85.0	1.9521509255404461	0.011353701123275686	Simulations
0.815865325409683	0.5745052778251019	1.6681880224545402	1.9294360569949727	1.1135707315852896	44.0	61.0	1.7326569406581023	0.012999771061648185	Simulations
0.9458616422928372	0.6647693293583774	2.1097233662741828	2.3454527660738442	1.399591123781007	55.0	69.0	1.6758128329205062	0.010795087351617251	Simulations
1.2985952346789276	0.4877283011177054	1.8332183190973987	2.6066191048008336	1.308023870121906	45.0	96.0	1.9927916946637223	0.010362405354161264	Simulations
0.722714479748362	0.7102003361920637	1.8995639239668685	1.9344382326901997	1.2117237529418377	48.0	49.0	1.596435019115328	0.013772527163497323	Simulations
0.7384568854816425	1.0566230677019386	2.0964208946130567	1.8805539244286367	1.1420970389469942	89.0	67.0	1.6465798091574555	0.010738394635235684	Simulations
1.0010555663498248	0.6679408660857028	1.6449475651795706	1.951283247175028	0.9502276808252031	78.0	99.0	2.0534902177133816	0.010485637118324159	Simulations
1.3568573161298216	0.6565189239356644	1.597395048319543	2.3577727770928525	1.0009154609630309	49.0	95.0	2.3556163023241954	0.013011626979114819	Simulations
1.0248986050101234	0.7816829049487903	1.87516231721718	2.1775633869161624	1.152664781906039	72.0	92.0	1.8891558249184623	0.00997545332316554	Simulations
1.2120859935833368	0.8758620830618844	2.472122803252416	2.721286865726843	1.5092008721435064	75.0	89.0	1.8031309920075917	0.009556227056228906	Simulations
1.4920075123486787	0.6108324273819752	1.5758520406570946	2.510079990246701	1.0180724778980221	71.0	151.0	2.465521900198278	0.00862180839570647	Simulations
1.1866937329254346	0.8541819223415461	1.9613125626012249	2.2782063246534645	1.09151259172803	70.0	86.0	2.087201138968739	0.012343832982967493	Simulations
1.0845920687609851	0.5618925451793564	1.68912441431901	2.235175987459344	1.1505839186983589	48.0	84.0	1.9426449050217653	0.011405026376195702	Simulations
1.169872745615931	0.7107780695280903	1.7556645001671374	2.292826042782009	1.1229532971660778	62.0	97.0	2.041782190379832	0.010616793537736514	Simulations
1.084143250640719	0.7160099854642388	1.4764384144711507	1.8753593931598178	0.7912161425190989	63.0	85.0	2.3702238773705875	0.014647333341478762	Simulations
1.1657548787463214	0.6558537389033052	1.779685307125498	2.320140332190094	1.1543854534437725	59.0	95.0	2.0098488986227534	0.01060091624205611	Simulations
0.8831413232584944	0.5580113236964028	1.6532414015856207	2.009734377231293	1.1265930539727984	54.0	80.0	1.7839044632347056	0.010437979424835124	Simulations
1.583162381264037	0.8590761620693333	2.199454765933746	2.7324971842266215	1.1493348029625845	99.0	129.0	2.377459707287377	0.009685433261902398	Simulations
1.3070722231967506	0.6047104116539712	1.6246619127548545	2.3223429443587325	1.0152707211619818	73.0	126.0	2.2874125058002273	0.009473940959867116	Simulations
1.1756777308689041	0.7444526650304242	1.8901557509440277	2.3537608938540457	1.1780831629851416	61.0	88.0	1.9979581813985505	0.01134689075993089	Simulations
1.1041961940488203	0.47542055320488696	1.1660570450341832	1.9167397841452383	0.812543590096418	37.0	97.0	2.358937794239192	0.012764302833623026	Simulations
1.1482902234307044	0.8727100665414127	2.252315277604324	2.4854945078032658	1.3372042843725613	86.0	100.0	1.8587246068909369	0.008943130329231497	Simulations
1.6312694487764496	0.7846441348349567	2.1182935505375684	2.932978133877046	1.3017086851005966	67.0	108.0	2.253175512653497	0.010851478682140944	Simulations
1.179908775226402	0.6796127334872886	1.9373940159719614	2.47830970310566	1.2984009278792579	56.0	88.0	1.9087399353246035	0.010597960793120316	Simulations
0.8863487130888502	0.7902999920279123	1.677003398364386	1.7901128654008704	0.9037641523120202	92.0	101.0	1.9807301062134213	0.009762696161935359	Simulations
1.1396009509289078	0.7688004673057613	2.227968320590648	2.5623066677656636	1.4227057168367558	63.0	81.0	1.8010096096771837	0.01047908492687475	Simulations
1.1699402670826122	0.6784696591919188	1.8961039865330889	2.306307974177376	1.1363677070947638	70.0	94.0	2.0295437469564144	0.010863355720878336	Simulations
0.8489349769345356	0.7243894897520213	1.8020240028716428	1.9254308046787478	1.0764958277442123	66.0	74.0	1.7886096304836328	0.011335656069532662	Simulations
[truncated: 4,040 more rows]
