# Supplementary material for: Initiation of chromosome replication controls both division and replication cycles in E. coli through a double-adder mechanism
Source: eLife journal article supplement (doi:10.7554/elife.48063), 2019-11-11
Supplement: supp [file elife-48063-supp-v1.zip › elife_poa_e48063_Figure_7_source_data_3.csv]

dLambda_if	dLambda_ib	Lambda_b	Lambda_f	Lambda_i	T_ib	T_if	R_if	alpha
1.1544050703293824	0.08142342166683081	1.1747463313814448	2.224390354347919	1.0699852840185367	11.0	81.0	2.078898081657526	0.01303480285867855
1.1043588666629787	0.0485174004907174	1.2137732876145997	2.272981347225063	1.1686224805620844	5.0	87.0	1.9450090897890342	0.011031918362138245
1.3750350565043103	0.14721863622239018	1.3773307618975519	2.5738032115595364	1.198768155055226	16.0	83.0	2.1470400266354788	0.01328131430345238
0.7560430260170985	0.0639607676241074	1.1334732647160162	1.8214663701731624	1.0654233441560639	8.0	67.0	1.7096174775633157	0.011547366596694607
1.0019474913333377	0.060587834525578366	1.1626364715194097	2.108886584959403	1.1069390936260655	6.0	78.0	1.9051514189919876	0.011921867510609162
1.271455366316158	0.06991813929369362	1.1439314755203764	2.3459368786704213	1.0744815123542633	8.0	99.0	2.183319909832894	0.011379025615858365
1.2318983806425439	0.11100625047647061	1.412692685261016	2.5145059760193096	1.2826075953767657	12.0	79.0	1.9604639681559612	0.012293609195634943
0.6251402541798241	0.12475872280259881	1.2801217662989082	1.7718883392688172	1.146748085088993	14.0	52.0	1.5451417467431918	0.012071907553566054
1.0103630306324203	0.06792568780951047	1.1127668053564905	2.0393463346303817	1.0289833039979615	9.0	74.0	1.9819042026306988	0.013336313919829972
1.0657884254050125	0.08021884042356331	0.856966977047621	1.849910763346597	0.7841223379415845	12.0	116.0	2.3592119160931384	0.010675043227657718
1.7284675365415894	0.490759219648754	1.8613110437305636	3.1114922966186924	1.383024760077103	34.0	98.0	2.2497733854347106	0.011936527442496478
1.082876662062123	0.09778874002135873	1.0747687787461515	2.0489229486374465	0.9660462865753235	14.0	96.0	2.120936622924113	0.0112989740771985
1.0789327716806332	0.17402391078938284	1.1770279111930277	2.0669608165577453	0.9880280448771123	25.0	104.0	2.0920062211542056	0.010239299440774799
0.9257984855527062	0.18986392899616056	1.4602556710710504	2.2013862066662275	1.2755877211135214	18.0	69.0	1.7257819044734395	0.011409422544718502
0.5200117532582103	0.24055014773697692	1.3266573903620402	1.620302387821169	1.1002906345629588	24.0	49.0	1.472613086872962	0.011395478115842298
1.1997677586520241	0.36670316971063843	1.8146719825557616	2.6381111528408674	1.4383433941888433	29.0	73.0	1.8341316569459656	0.01198763289918594
1.091464764997776	0.10442570264873319	1.3997675990633032	2.360584690846399	1.269119925848623	12.0	73.0	1.8600170423358107	0.012264600548392037
1.6294910817725567	0.16290080454545786	1.4421808953044895	2.9002963139107094	1.2708052321381527	16.0	103.0	2.2822508442390568	0.011557838526683966
1.3720428969449727	0.3785993527243724	1.2834306869280956	2.2804351498814013	0.9083922529364286	45.0	115.0	2.510407968044386	0.011547146404742884
1.0279170255209964	0.3523046927758138	1.3467785728498247	2.0513998303251375	1.023482804804141	32.0	84.0	2.004332481890308	0.0119419267256457
0.9717545689954166	0.3902799259306371	1.605117098690115	2.2029646673228362	1.2312100983274197	34.0	76.0	1.7892678676982348	0.011044334033357162
1.0160240234605167	0.39380597800368444	1.5779022111752283	2.1919700349219187	1.175946011461402	34.0	74.0	1.8640056716531204	0.012140624996221656
0.9917546004932176	0.26911242650164957	1.7401471844248726	2.450905309277792	1.4591507087845743	23.0	66.0	1.6796793467066313	0.011336149191715526
1.0492969353279442	0.5036740142196741	1.660389259172885	2.1872508482668898	1.1379539129389455	47.0	84.0	1.922090889092309	0.011222339974165559
0.6106621126939351	0.24691823361098186	1.3596411539459936	1.7189906678760416	1.1083285551821065	28.0	53.0	1.5509757100804813	0.01194671872492784
0.8684110312358981	0.4099103673630744	1.414043253812539	1.9000201121241593	1.0316090808882612	35.0	70.0	1.8418024301299847	0.012587404457839265
0.9840398223028533	0.2477843870356824	1.434959427207565	2.137201376743127	1.1531615544402738	24.0	63.0	1.8533408163962686	0.014129019163108316
1.107149889425236	0.37560745838909515	1.7027098984262787	2.405623495456828	1.2984736060315918	32.0	73.0	1.8526549051766394	0.01218622157488667
1.238225345799278	0.46863950815914657	1.2879856630709887	2.1299092421166117	0.8916838963173338	40.0	98.0	2.388637106617227	0.01281824172637793
1.5251997372579191	0.45034598274960014	1.7668951373828534	2.8426849806146786	1.3174852433567594	35.0	93.0	2.1576598257540507	0.011929757301721905
1.373652532571368	0.42262599106539667	2.0104026879466246	2.9354210492002317	1.5617685166288637	31.0	81.0	1.8795493813234556	0.011239343453657161
1.064138842264984	0.3250085016864346	1.7650064567951977	2.474449903512309	1.4103110612473249	32.0	74.0	1.7545419386584298	0.010960735577868362
0.6155776964498729	0.24135579975754928	1.523685984051866	1.885606356342015	1.270028659892142	24.0	50.0	1.484695909541247	0.011403349466025262
1.031884870642861	0.2726382256136981	1.472524780193152	2.25690680118373	1.225021930540869	25.0	81.0	1.8423399164676713	0.010883200826480033
0.9549095163211951	0.1568397538111559	1.143335468332918	1.9648052086048307	1.0098956922836355	17.0	93.0	1.9455526185698422	0.010324516121945666
1.348800752690998	0.3475418256776497	1.592864087790883	2.5777834460399274	1.2289826933489294	37.0	111.0	2.097493691319256	0.00962762586886548
1.505424174487847	0.6349520701785831	1.954177100728091	2.7149260975381098	1.2095019230502628	50.0	82.0	2.2446645563748198	0.014225608098954647
1.004073784270427	0.322041474583145	1.453702723881705	2.1322972579004422	1.1282234736300152	39.0	94.0	1.8899600192148622	0.00976974165491986
1.1023786159791273	0.3551103382389267	1.8222052436576446	2.5697878540812877	1.4674092381021604	25.0	66.0	1.7512414310576803	0.012248151385898801
1.2989857223640322	0.42281128512971233	1.4602769321443385	2.3158977553466875	1.0169120329826553	47.0	101.0	2.2773825859391597	0.01175620470812121
1.411230500484774	0.30039794203151404	1.3381962566687835	2.3935021219034414	0.9822716214186673	37.0	100.0	2.4367008775501153	0.01284929160802146
1.0686247942582772	0.16784258161203514	1.0555558664463573	1.9347707287844644	0.8661459345261873	25.0	95.0	2.233769912968365	0.012205058844696129
1.1863913503808106	0.6419472160843649	2.1602390469114976	2.726239015128955	1.5398476647481445	42.0	72.0	1.770460206902905	0.01144617247068379
1.2686567069135513	0.07355334791118562	1.3112221944067246	2.5017664437390126	1.2331097368254613	8.0	89.0	2.02882709383157	0.011467931652697504
0.6869049150197359	0.2949570450617649	1.3623653997117762	1.7583546294591723	1.0714497144394364	34.0	68.0	1.6410986029140084	0.010509734170492648
1.0996695018570586	0.372218696479085	1.6670993181722278	2.3891354963337856	1.289465994476727	31.0	75.0	1.852810005511864	0.011862865990361324
1.5909035605059474	0.528676349933058	1.7113261840938436	2.7731664680540216	1.1822629075480742	48.0	111.0	2.345642792604704	0.011080930887853373
1.4171082540275666	0.4235126140229588	1.6957949529287768	2.605889036245488	1.1887807822179213	43.0	89.0	2.192068609473693	0.012722392740038306
1.5728962305854448	0.26260311305568895	1.868457830030119	3.169882856004539	1.5969866254190943	20.0	89.0	1.9849150929317723	0.011113228041772723
0.4066022853899123	0.11497853541426817	0.9016755480149646	1.1976613255709871	0.7910590401810749	18.0	56.0	1.5139973942992173	0.01068504861324266
0.8916848476596089	0.2522450092857569	1.040682979318553	1.6734110963419981	0.7817262486823893	40.0	100.0	2.1406612598240833	0.010980565204147006
0.9823241135036074	0.13830812886013644	1.219238642031267	2.0833176068705996	1.1009934933669923	16.0	101.0	1.8922160933935428	0.009109671837871362
0.9460185258707934	0.32105914235495114	1.3986615682369594	2.0122681830113147	1.0662496571405213	28.0	63.0	1.8872392310144652	0.014544084349952708
1.2735688955677902	0.2135601729417438	1.3146743385258186	2.3799746865427154	1.1064057909749252	20.0	89.0	2.1510866139317355	0.012416467599260803
1.1132863101344772	0.5133906187419033	1.3886868823533036	2.0654990581732013	0.9522127480387242	50.0	107.0	2.1691571158100085	0.010440509847639784
1.0824334948888301	0.6565094509303655	1.8855283525973046	2.3199302538711173	1.2374967589822872	45.0	69.0	1.8746960240760706	0.013139951974149546
0.7200901073966535	0.31194830129921414	1.3676974048015944	1.753712922261657	1.0336228148650035	36.0	65.0	1.6966662277967433	0.011733888960056291
1.0858788494219056	0.21324916645701064	1.2753288136205352	2.1349994216685473	1.0491205722466417	26.0	90.0	2.0350372284632146	0.011389502078177627
0.7993449409034499	0.33853728625900703	1.397904623327194	1.8676795220321607	1.0683345811287108	36.0	70.0	1.748215919453745	0.01151261972691457
0.9046063096501635	0.20961325719395085	1.3353583220899161	2.024223511551287	1.1196172019011237	23.0	74.0	1.8079603529796888	0.011545446500469864
1.4928798579746718	0.3139222484794151	1.5635320423590022	2.71902518166473	1.2261453236900584	34.0	113.0	2.2175390870324256	0.01016778348797485
0.9827626393851057	0.10382342149809354	0.8679885141525479	1.7406358045378485	0.7578731651527428	21.0	125.0	2.296737613327473	0.009596688384163039
1.3318280776105638	0.6783803292677595	1.9050658117285848	2.603718247748937	1.2718901701383734	45.0	81.0	2.047125065417928	0.012760484492694438
1.1489128761685348	0.6221623440034112	1.6954985794583395	2.224781676407533	1.0758688002389984	56.0	88.0	2.067893107331777	0.01191092741352006
1.0118890654002652	0.48030664620048635	1.6253512807057102	2.163161824750791	1.1512727593505256	40.0	72.0	1.8789307808960132	0.012637665547134618
1.148486201045847	0.11274688553522227	1.2399983398661272	2.2842864315889098	1.1358002305430628	13.0	103.0	2.011169191695549	0.009786742281226064
1.0361312219106809	0.09817989241696434	1.1078998900394617	2.0462230197386084	1.0100917978279276	12.0	90.0	2.025779264952698	0.011316410914217579
1.1744706220263592	0.31069549622127335	1.4371128241641091	2.277504788000356	1.1030341659739968	38.0	103.0	2.0647635932376427	0.010155112704615882
0.9771355257784862	0.67551137937502	1.6567529001315806	2.001941905435378	1.024806379656892	45.0	63.0	1.9534830629231972	0.015334107097304222
1.3402319266955227	0.166140766318577	1.2423799687132426	2.4148024794023053	1.0745705527067826	17.0	92.0	2.247225622663448	0.012697228034230377
1.0328499220954717	0.1412447929338001	1.0595357345504668	1.9455136373072899	0.9126637152118182	21.0	105.0	2.1316872851198645	0.010399960121174836
1.1387310789991947	0.34192766787988205	1.4132539004528757	2.210322641786693	1.0715915627874981	37.0	101.0	2.062654017205071	0.010341602461392391
1.3221425020052846	0.2784850858265684	1.2432227512527116	2.3313690048674083	1.0092265028621237	28.0	120.0	2.3100552732768556	0.010066061431529131
0.9819851471665211	0.2779773247171615	1.420197510987452	2.14516627910706	1.1631811319405387	25.0	77.0	1.8442237586232784	0.011467710490370106
0.7167404187262394	0.07550372120683346	1.1390485653598106	1.7645037005652418	1.0477632818390024	10.0	58.0	1.6840671277086923	0.01296464906989851
0.8085190088889016	0.38464533692509795	1.4029481939409214	1.8325146247215605	1.0239956158326589	36.0	65.0	1.7895727251053286	0.012917156516132188
1.092686453850892	0.16861322074559704	1.3637506484200528	2.2799114016766127	1.1872249478257206	19.0	87.0	1.9203701925671575	0.010820510898691602
1.2907272370278569	0.40676126438790217	1.5642182705744054	2.426467591659561	1.1357403546317042	50.0	113.0	2.1364633049834807	0.00969225254950577
0.9128402604669217	0.3636496627901302	1.692653555963202	2.1644602756599487	1.251620015193027	36.0	63.0	1.7293269917277105	0.012543026799666738
0.8856386402609857	0.7528939830383787	2.33393462682612	2.3783498686498508	1.492711228388865	46.0	47.0	1.5933087548466331	0.014298422607382495
1.4828996625459108	0.37082055495647404	1.4743337556663718	2.600504342875851	1.1176046803299404	40.0	121.0	2.3268552723921374	0.010069268426712201
1.0365830304966857	0.23839764056110746	1.4412295582296766	2.2371576751854563	1.2005746446887706	30.0	99.0	1.863405732481884	0.009070119562190433
1.2213202296196377	0.26563036871524326	1.3307698337867597	2.2415942499116546	1.0202740202920169	35.0	96.0	2.197051189512871	0.011828838372692678
1.1448002093076737	0.5892812247053212	1.7345279689469772	2.316217945235098	1.1714177359274245	45.0	79.0	1.9772775109993725	0.012449561615191377
1.1974144300957352	0.24429334202147923	1.3057378460102467	2.216272304753547	1.0188578746578116	31.0	91.0	2.175251681200278	0.012320684983220987
1.08631959054044	0.9450904333519226	2.1754399968395575	2.3147290343367235	1.2284094437962836	50.0	55.0	1.8843302174422167	0.016619123830221964
1.1927552804112298	0.22524307936533705	1.2510943440389697	2.185371111105606	0.9926158306943761	29.0	90.0	2.2016283072745755	0.012650788051307031
1.3341244063184288	0.45666886224292647	2.417125571968432	3.2357022798792627	1.901577873560834	30.0	66.0	1.701588099476668	0.011619421947921602
0.5212843681184705	0.4252789120659224	1.4395036708221207	1.5440911984979873	1.0228068303795168	37.0	44.0	1.509660624699823	0.013505096925485809
0.760072563876978	0.3821163389042276	1.331322082804901	1.7179725757469935	0.9579000118700155	41.0	72.0	1.7934779773028313	0.011705000417838384
0.7976658437970618	0.619755371488034	2.0767394996805217	2.21714563181666	1.419479788019598	46.0	53.0	1.561942375319013	0.012138513757888684
1.2016342017635009	0.5990496842423583	1.9302409268784266	2.6011145993199487	1.3994803975564478	36.0	74.0	1.8586288195687521	0.012084306531215285
0.942721196772608	0.37154293752568335	1.104739028055884	1.7045382036698138	0.7618170068972058	45.0	97.0	2.237464099957816	0.011977984892426281
1.446168974920668	0.37098013395160656	1.1559009147317203	2.2415244142094535	0.7953554392887854	43.0	112.0	2.8182675361016534	0.013346505108452235
0.5759199581751084	0.7067038213577184	1.784377552721991	1.6532997911393088	1.0773798329642004	54.0	45.0	1.5345560967022902	0.013729364120658949
1.1158020449425927	0.14441784443759054	0.9645904288147802	1.9366453866385447	0.8208433416959521	23.0	120.0	2.359336170818202	0.010319841634317423
0.8952445983007704	0.5668645486463642	1.677206559454956	2.0062553878617475	1.111010789560977	39.0	57.0	1.805792893023597	0.014958463844585084
1.2020242903702363	0.3516727840745373	1.3825205113647572	2.3163456124906925	1.1143213221204562	35.0	126.0	2.078705276932949	0.008378454162340274
1.16312651051021	0.09911671082614126	1.4210777335110822	2.473470626459434	1.310344115949224	12.0	92.0	1.8876496611484623	0.009962946001804225
1.1078378239802258	0.25522111645422485	1.4765257905776523	2.3638664878581177	1.256028663877892	21.0	82.0	1.882016355072552	0.011125355675725085
1.3920349078394114	0.21220884291510678	1.3133916748529912	2.4881092865328234	1.096074378693412	23.0	102.0	2.2700186546635663	0.011595138758926253
1.0739138054291963	0.2929396306355063	1.3124825983005728	2.105950455968242	1.0320366505390455	30.0	85.0	2.04057719739728	0.012105615181784702
1.0606490670539874	0.30457172649194986	1.1195918323542062	1.921442677023277	0.8607936099692896	37.0	115.0	2.2321758140047394	0.010073484029298887
1.2567249648958634	0.49291028359694333	1.39045751677805	2.1143168020009053	0.857591837105042	54.0	97.0	2.465411528563714	0.013420912191467552
0.7505971072114983	0.49771754213006814	1.4649264768843246	1.7627207957833189	1.0121236885718206	52.0	75.0	1.7416061057425154	0.010672244939524322
0.7945657715198955	0.5085966588926498	1.6530323860205447	1.9298909729856388	1.1353252014657433	45.0	63.0	1.6998574245459224	0.012149424531190578
0.9713569131463229	0.6800330692888941	1.8583248289237604	2.211906533988732	1.240549620842409	53.0	76.0	1.7830052880002594	0.010977776074794861
1.2740577067940921	0.2942083954693425	1.2559582567227963	2.17082445333171	0.8967667465376179	49.0	119.0	2.4207236293196424	0.010717969564992599
0.8988377763028128	0.012634414759197021	1.5180224367829778	2.387522977851905	1.4886852015490921	2.0	45.0	1.6037796139623761	0.015143909001764213
1.020978517001209	0.5313370246224505	1.5675611056983672	2.0821501767987427	1.0611716597975338	54.0	86.0	1.9621238068080393	0.011307163675934784
1.1910285159814493	0.24667364646164636	1.3186557621274884	2.252027371033394	1.0609988550519445	39.0	129.0	2.122554006830798	0.008417064050876742
1.220992626696615	0.3580506545424642	1.375149639172236	2.2674676865714756	1.0464750598748607	36.0	102.0	2.1667670578242193	0.01093670649266843
0.9073570740539978	0.11283984842345385	1.423750096455445	2.199698698079561	1.2923416240255632	13.0	68.0	1.7021031104977005	0.01128409464222471
1.5956717225156711	0.3186350062568637	1.6030469523112991	2.92058854204212	1.324916819526449	25.0	107.0	2.2043561520231854	0.010657545188624063
0.9851869529195703	0.36406591026521395	1.3909871588719953	2.042773466048288	1.0575865131287177	31.0	72.0	1.9315426593376614	0.013191021399325632
1.098076006961167	0.4769374341400805	1.7278320839588286	2.371036285269498	1.272960278308331	40.0	84.0	1.8626160813284982	0.010682504042003304
1.0830498389586047	0.31538623146415934	1.27805707323014	2.0618857500140355	0.9788359110554309	34.0	93.0	2.1064672093924353	0.011557262991041956
0.9424835259144522	0.3438187754390729	1.4357689281828032	2.051398495756818	1.108914969842366	33.0	77.0	1.8499150534945232	0.011525441882457346
1.3443053375695808	0.6379193035219801	1.857076176746825	2.621175135700943	1.2768697981313621	48.0	94.0	2.052813168215669	0.011038322660110844
1.4649819502427384	0.2851359422134827	1.4655841501016842	2.6458109603842654	1.180829010141527	28.0	108.0	2.240638515535077	0.01077694366832928
1.0442854608639138	0.6270257425621966	1.9575773562451066	2.411669073344042	1.367383612480128	48.0	76.0	1.7637106744096587	0.01077123572764059
1.0971596942065447	0.42149979762701073	1.589224041896643	2.235915092289668	1.138755398083123	46.0	87.0	1.9634726615157243	0.0111885920773144
0.8811636277955919	0.631534222344378	1.5064445006176412	1.8056495847334841	0.9244859569378923	59.0	81.0	1.9531390078808835	0.011923390514621332
1.0337544026802123	0.796745529511597	2.084485631610875	2.308899247264067	1.2751448445838545	53.0	64.0	1.8106956688654297	0.013383501358141925
0.7164238037530901	0.6133028769543827	1.8428996738279995	1.9324826636272345	1.2160588598741444	41.0	45.0	1.5891357954722982	0.01484983137137836
1.3642675472507926	0.5260933167239412	1.7283873657901547	2.5470725373418013	1.1828049900910087	41.0	83.0	2.153417138649222	0.013332865194901313
0.7953792517190144	0.7845330552862333	1.7339245832718702	1.7939268936085917	0.9985476418895773	62.0	65.0	1.7965361073948338	0.01300335279089195
1.0171118329026463	0.28455398667708853	1.610147264059945	2.314330619038402	1.2972187861357556	22.0	56.0	1.7840711557473576	0.01491380637028862
2.0335502962482823	0.4048739910446669	1.4667471520961761	3.010102308440893	0.9765520121926107	48.0	124.0	3.0823778670860946	0.013097126870342974
1.4265355510552609	1.0506687099464174	2.5073380119330526	2.854005256153755	1.4274697050984941	63.0	78.0	1.9993455874825947	0.012814459793667516
1.3503926988608064	0.1639168552138648	1.5373117501835358	2.697987509346774	1.3475948104859676	17.0	85.0	2.002076208926502	0.01178231636859565
1.0049849237244428	0.4545142574970602	1.4412950379559062	2.0548672442699747	1.0498823205455319	34.0	74.0	1.9572357816276402	0.013092129230606904
0.707519848584393	0.0777569871039554	1.1645565105097182	1.7925659373091996	1.0850460887248066	9.0	62.0	1.6520643278995653	0.011681771989553232
1.283095341881325	0.33190687070975733	1.2924176482493104	2.2114093349364907	0.9283139930551659	38.0	96.0	2.382178176220894	0.013044597128568588
1.1613692831955187	0.20344515286204223	1.1288190156487976	2.1212192198064663	0.9598499366109475	25.0	126.0	2.2099488043892555	0.009079467845807933
1.055835742894785	0.3729243577111301	1.3036926026654652	1.9984572826902196	0.9426215397954345	38.0	86.0	2.120105682206159	0.012606234668419128
1.0526490609586976	0.3422539702868419	1.391336661362796	2.1400457581715684	1.0873966972128708	37.0	107.0	1.9680451151422147	0.0091286289080358
1.2735002785249898	0.760351235236969	2.1552177534635644	2.5926433378986258	1.319143059373636	50.0	68.0	1.9653996732770451	0.014335628252161225
1.0907496582089244	0.6156435725630902	1.9377766806624879	2.428791903935746	1.3380422457268217	42.0	69.0	1.815183273691356	0.01246543797435308
0.7614915094070724	0.3988663657118745	1.548503797600818	1.9398677390091832	1.1783762296021107	40.0	75.0	1.6462210372863655	0.00958877411622173
1.135903417942286	0.5137447714748902	1.1382336992270932	1.8069667009588226	0.6710632830165365	58.0	110.0	2.692691951251183	0.01299135629455308
0.9783875186816096	0.2257813091488181	1.466722365785073	2.19441808750429	1.2160305688226802	27.0	80.0	1.8045747728437873	0.010645736534662081
1.755966424542738	0.6546970092035469	1.6871536762321266	2.839337035403488	1.0833706108607501	54.0	120.0	2.620836311174809	0.01158356042073185
0.9466232777048649	0.1927067948904655	1.504062513700407	2.2356608047751716	1.2890375270703067	17.0	58.0	1.7343644058651475	0.013696673342513533
1.1168925323049692	0.8165476977536572	1.9967236430972417	2.2732057936062415	1.1563132613012723	61.0	75.0	1.965908261787173	0.013002613340571236
1.050272036834961	0.3314974220252851	1.1448007268001128	1.8411554892899926	0.7908834524550317	53.0	118.0	2.3279732096742505	0.010331139455940394
0.5200071397570014	0.3929718509848976	1.7597968574489546	1.9005834513762354	1.380576311619234	33.0	42.0	1.3766594684991382	0.010980279464147834
1.1074425948648658	0.6129416404371022	1.5620770944983386	2.125291560095033	1.017848965230167	53.0	88.0	2.088022518757917	0.012069741716674662
1.2165014744606382	0.3809961669384354	1.5974381533111683	2.398780380284752	1.1822789058241139	50.0	112.0	2.0289462735636556	0.009113666634634292
1.464613891479937	0.5579532968963179	1.7811758736962762	2.6174638976803584	1.1528500062004214	55.0	97.0	2.270428836017472	0.01219551358611238
1.0137884108704591	0.4650219682446417	1.5403063191449191	2.112399077179488	1.098610666309029	38.0	73.0	1.9227913417921338	0.012920578249842479
0.9933340670626616	0.590825432193379	2.013922422269707	2.444996506628983	1.4516624395663213	38.0	60.0	1.684273450899106	0.012535439779315895
0.7466869543247374	0.3194237606601089	1.4086225510162929	1.860713208394977	1.1140262540702395	29.0	64.0	1.6702597462103068	0.011563632456380216
1.1692036710589195	0.6359766805428679	1.8632735812086507	2.3451667735619286	1.175963102503009	63.0	92.0	1.9942520038003724	0.010824431820870112
1.0987574883963496	1.1717017111863606	2.196073836713418	2.3367652421719485	1.238007753775599	66.0	62.0	1.8875206839742542	0.014782136354452215
1.3835249934564502	0.6082643236492675	1.9357708205339788	2.7038303292216255	1.3203053357651753	48.0	90.0	2.047882604105842	0.011490366827708914
1.297273700491593	0.502270376325431	1.5750694699361463	2.3756960381163283	1.0784223376247353	52.0	105.0	2.202936600283045	0.010851695003769963
1.2075759843035632	0.6649628582806907	1.8117803446680938	2.228218416426088	1.0206424321225247	71.0	93.0	2.183152832272799	0.012111969141566495
1.1948334002962748	0.281187579148128	1.1396064895495854	2.031451332457776	0.8366179321615012	36.0	98.0	2.4281709181266073	0.013059897714101898
1.3413061809664688	0.1988183669557385	0.9457052766029874	2.0844559153747744	0.7431497344083057	35.0	146.0	2.8048935750941415	0.010191411180115894
0.8033657313980578	0.2347268959276907	1.6390808854843728	2.2151886508984817	1.411822919500424	19.0	58.0	1.5690272627691368	0.011204662417180461
1.08029431741098	0.30687419827386075	1.3618151760482962	2.131835328507831	1.0515410110968508	41.0	110.0	2.027343970430727	0.009269008047458413
1.1902073827532194	0.369003857023551	1.4649347480343955	2.342008749224809	1.1518013664715898	30.0	88.0	2.0333443051897757	0.011634710530778986
1.0488487270743798	0.6957782438939912	1.9538278599263272	2.319693011191494	1.2708442841171141	52.0	74.0	1.825316476757056	0.011731711119222311
0.949929749449698	0.43869171836280874	1.2321122031701326	1.773745785037335	0.823816035587637	50.0	91.0	2.1530848009921324	0.012158298267462687
1.2580447072953636	0.39467871387218323	1.355268157576274	2.2300627482938444	0.972018040998481	38.0	95.0	2.29426065590621	0.01261083482488037
1.5361839795343935	0.09963362482442806	1.0898927731034758	2.5104215719986716	0.9742375924642782	14.0	114.0	2.576806306199604	0.011978807864341391
1.262030764298642	0.9032021826908379	2.37277999179276	2.637462520849816	1.375431756551174	63.0	74.0	1.9175524400157233	0.012692784218682668
1.1294904536936552	0.45139947938340685	1.497189935999786	2.1943896124488953	1.06489915875524	36.0	77.0	2.0606548464306385	0.013546790623065496
0.9046748653573096	0.4721198049261073	1.5207287737487256	1.9663284681591127	1.061653602801803	50.0	87.0	1.8521375173312538	0.010220588731723384
1.233584224429663	0.7080426266032358	2.006030678891651	2.5754332379514886	1.3418490135218255	52.0	89.0	1.9193167129824764	0.010568458372985326
0.8747732491076161	0.6527136434914256	1.7903514668716638	2.020103584142308	1.145330335034692	53.0	68.0	1.763773753605434	0.012039198712271278
1.4767645590026834	0.5258807979645184	1.453336114443346	2.472573694466261	0.9958091354635777	48.0	116.0	2.4829795253035183	0.011310968664422444
1.1489997022102274	0.21882994587351434	1.257562902519204	2.19171136861609	1.0427116664058624	23.0	89.0	2.1019342539541452	0.01204177015945794
1.1536530691453244	0.3364837924284315	1.3667572127227017	2.1615537103192146	1.0079006411738902	38.0	92.0	2.14460991690776	0.011964296302062086
0.6953575777502465	0.6020214829767296	2.1891574001837317	2.241496328366328	1.5461387506160815	42.0	44.0	1.4497381476747615	0.012177098717594452
1.2598044328484268	0.7693908385158797	1.7312968423123634	2.2224204803457774	0.9626160474973505	58.0	85.0	2.308729930405502	0.014201169647481792
1.2995375180611735	0.7169949827277906	1.8448459303906586	2.4422555173077245	1.142717999246551	57.0	89.0	2.1372337872668683	0.01231173853755731
1.3868261934747088	0.1147466459780011	1.2322561491406026	2.512957322272404	1.1261311287976952	14.0	125.0	2.231496189040918	0.009264090742007094
1.2066653814887873	0.32032517004325034	1.3028968209122516	2.16031051618962	0.9536451347008325	33.0	77.0	2.265319076856959	0.015320964576951267
1.3996440151422347	0.2801308770044051	1.598597819764039	2.688014104087778	1.2883700889455432	26.0	84.0	2.086367983199426	0.012630876615119257
0.9904788889916778	0.2040814867720928	1.7464847525789298	2.5263878951017067	1.535909006110029	15.0	56.0	1.6448812299761475	0.012821132441430577
1.012981493400246	0.11340175330590974	1.1947416465384357	2.098925218110991	1.085943724710745	10.0	69.0	1.9328121433457028	0.013778281505422246
0.9679275622083019	0.18919803055832818	0.8411504925677148	1.6371040951984683	0.6691765329901664	33.0	127.0	2.4464457650407856	0.010162892127513501
1.1855951461216638	0.14548142478328108	0.9857817929134024	2.007659606188882	0.8220644600672181	29.0	137.0	2.4422167648808473	0.009402855882560925
0.9605717582260109	0.6860798927171214	2.025426191745225	2.2776120025344486	1.3170402443084377	54.0	68.0	1.729341234922093	0.011620920158057558
0.9595256253449593	0.5936526119313428	1.799620013907255	2.1783411075444037	1.2188154821994444	46.0	69.0	1.7872607784842238	0.012141306561991904
1.4246085573566578	0.27288232491152176	1.0696533270762185	2.2665199179204643	0.8419113605638063	26.0	111.0	2.6921122865032183	0.01287151878566984
0.8729325757057793	0.4755025313297845	1.53006098373191	1.983437626683418	1.1105050509776386	40.0	70.0	1.7860680822093413	0.011954101069378883
1.0011042408021424	0.36814405846614107	1.5109014289176876	2.1230236352861276	1.1219193944839851	39.0	83.0	1.8923138736384797	0.011086161505404311
1.1692111151655507	0.2500122488053278	1.6518553036461214	2.5800746006766673	1.4108634855111166	24.0	91.0	1.8287202320938782	0.00956960857545555
1.1583077328192937	1.1334630579366245	2.139061703940554	2.260010170507237	1.1017024376879434	65.0	65.0	2.0513798401409944	0.01594761000989178
0.9811850888981939	0.205593998965794	1.361536391796367	2.0938164027812225	1.1126313138830286	22.0	61.0	1.88186003454631	0.014953431639222482
0.9309014975555587	0.3775529737044627	1.4693587132334032	2.0380478732125162	1.1071463756569575	40.0	87.0	1.840811583746712	0.010118873186281031
0.9288477485773782	0.2732823689262548	1.1812638265327713	1.810060303452637	0.8812125548752588	38.0	88.0	2.0540564174200426	0.01180086145180117
0.4284696830697783	0.6092990892595129	1.6641297337304297	1.55835458133353	1.1298848982637517	56.0	41.0	1.3792153375341065	0.011313359099698031
1.506594543878989	0.35047768593203554	1.6023571151779108	2.721736487819816	1.215141943940827	37.0	105.0	2.2398506622139567	0.011080024252755718
1.2436089807741109	0.5305233633963482	1.5122463376500577	2.2435452593454746	0.9999362785713637	48.0	90.0	2.2436882303649277	0.012954135794560616
0.9718488146469013	0.9526417592049012	2.053503926259457	2.0701559306350688	1.0983071159881674	68.0	68.0	1.884860710178055	0.01344791049013702
1.0390156162531037	0.6234981841731462	1.828496412051474	2.2555691043024924	1.2165534880493887	54.0	81.0	1.8540648861391638	0.010996194251876912
1.1648085524025737	0.44419287135852215	1.8229363960260396	2.544637548800297	1.3798289963977233	40.0	90.0	1.8441687741332464	0.009810785488658281
1.6462053625282158	0.6168421834182629	2.1638230506001053	3.1398782918785253	1.4936729293503095	42.0	83.0	2.102119031670643	0.01291378751394355
0.6462476919302809	0.7661762166299526	1.912328173227008	1.7123761350129674	1.0661284430826865	57.0	49.0	1.6061630717417783	0.013951395414838414
1.0876019281236329	0.7271277465586992	1.9185488931387156	2.244515712446681	1.1569137843230481	51.0	66.0	1.9400890047826924	0.014486709696135478
1.1424020912605384	0.42108880302557306	1.5308799632670633	2.272288759830008	1.1298866685694695	40.0	91.0	2.011076706221266	0.011076572634898961
1.0865729545503773	0.41974480969391403	1.8043021378684152	2.432170984384288	1.3455980298339107	36.0	73.0	1.8075018916938328	0.011698591192763893
0.9555690150151509	0.2728459901342326	1.0236802499129127	1.7006903673902396	0.7451213523750887	47.0	120.0	2.282434078649412	0.009921443273637108
1.110887089806926	0.5840241497046748	2.2308266802517474	2.737464671170968	1.6265775813640417	38.0	65.0	1.6829597939468344	0.01155385709187466
1.3015177893161143	0.45940627413925506	1.5514364738975164	2.359271103224763	1.0577533139086488	49.0	95.0	2.230454938975041	0.012182505286229208
0.8393221717761572	0.39633406615816	1.6757220152392687	2.1366007371970843	1.2972785654209271	35.0	68.0	1.6469868493539959	0.010585721112748048
0.8689979473621616	0.14786890633182104	1.0284172943327679	1.7231246221211274	0.8541266747589658	23.0	82.0	2.0174110855481624	0.012347623051512243
0.6997445409013436	0.3106701812810255	1.5327686246125911	1.9106493303830832	1.2109047894817395	27.0	48.0	1.5778691660810347	0.01370786634945435
1.2120270256442154	0.011668913249780477	1.310246963623732	2.503695839841047	1.2916688141968315	2.0	90.0	1.9383419436334863	0.01060914555089795
1.430757647747478	0.4707548056875266	1.535460719712773	2.459806037417105	1.029048389669627	58.0	121.0	2.390369648415483	0.010390361444766412
0.8732954020293919	0.9081633638159639	1.8293663092288512	2.034692725234962	1.16139732320557	69.0	66.0	1.7519350911013047	0.012256807944274086
1.1371939095284485	0.5570932191781948	1.592083939352524	2.1594669192457228	1.0222730097172743	53.0	90.0	2.1124170341178794	0.011987718668662056
0.8249277715286379	0.4801590849310361	1.4297894049081434	1.7767344200640975	0.9518066485354596	53.0	82.0	1.8666967947722894	0.010981556237082541
0.8980437019804026	0.37880989483505667	1.2604924848031416	1.8502814867020088	0.9522377847216061	43.0	107.0	1.9430876577145617	0.008956551271958267
0.8684094677225814	0.6238906850667567	1.421672891908345	1.6785184395362398	0.8101089718136584	70.0	90.0	2.071966239033745	0.011677783285560312
0.5849750268968477	1.2261761274564997	2.6435476773859747	2.0700479984163067	1.485072971519459	59.0	32.0	1.3939032209968294	0.014972824939176713
0.894432123339392	0.40888134440608725	1.2321825999272609	1.7458304080615847	0.8513982847221927	54.0	99.0	2.050544897011674	0.010464720525776324
0.8957153041343537	0.9374348094450102	3.10569712705915	2.612856229131203	1.7171409249968494	56.0	53.0	1.5216317956757086	0.011426779204851328
1.4558856715410586	0.7736438066357844	1.7029840102409866	2.4203176184030966	0.9644319468620379	67.0	113.0	2.509578437626479	0.011747301227151877
0.9324164122223391	0.4287454144717642	1.7517991302274298	2.1762928000183903	1.2438763877960513	46.0	69.0	1.7496053638211035	0.011696080411909239
0.9467357618039509	0.4009723348817966	1.6000568445546786	2.104983696559629	1.158247934755678	36.0	62.0	1.817386099638206	0.013901047572409815
0.7760506819459124	0.6492550253836686	1.3277130721203447	1.5027429947632602	0.7266923128173478	71.0	86.0	2.0679219640251936	0.012188159820138704
1.5021429954070882	0.8865223370294535	2.5309356744629086	2.975494417788917	1.473351422381829	59.0	77.0	2.0195415517220696	0.013169192591560018
1.3321233128520904	0.2776961698943301	1.1208466967818458	2.197037801891457	0.8649144890393667	39.0	137.0	2.54017920815691	0.009817009356780643
1.159481314212598	0.29298578162531674	1.341939630124948	2.2154732742371395	1.0559919600245415	33.0	102.0	2.0980020285245837	0.01048054973367255
0.9183730418627913	0.36383599176840264	1.4161425894554407	1.9738398332910339	1.0554667914282425	38.0	80.0	1.8701107882513879	0.011289046751587713
1.2228492629400862	0.5199203519064661	1.8321956138978104	2.452512836780459	1.229663573840373	51.0	87.0	1.994458394112623	0.01144824170167875
1.046496301107929	0.6582679826605677	1.7073616224587485	2.118934698420322	1.072438397312393	69.0	103.0	1.9758101758856483	0.00953829464081455
0.9428546680522094	0.5951359105856042	2.0278150068114966	2.331577418254042	1.3887227502018324	53.0	70.0	1.6789365752920646	0.010679253300363404
1.0441012700613792	0.5711479429732154	1.521269178127015	2.079327252027802	1.0352259819664227	47.0	84.0	2.008573285687921	0.011978227394633466
1.4069380457073093	0.6608699798819877	1.8297404242197868	2.6179762406750133	1.211038194967704	49.0	88.0	2.161761909371347	0.012638723150905544
1.124910207668248	0.46567968330004694	1.5792663884098195	2.2611626330977184	1.1362524254294704	42.0	87.0	1.9900178714629055	0.011411280310664199
0.8059924313402533	0.5454075180738931	1.745903407465235	1.990962192477317	1.1849697611370638	50.0	67.0	1.6801797461623371	0.011173366884082256
1.2221313538219383	0.5333122957726446	1.6481280542118804	2.372082983243939	1.1499516294220007	51.0	104.0	2.06276761783121	0.010044050988570988
0.9826819441147361	0.34027046897057334	1.309789745354142	1.9534116418475722	0.9707296977328361	40.0	89.0	2.0123126411088634	0.011335443433142522
1.4313952964546082	0.3693236072244941	1.6130034433567224	2.640941692468242	1.209546396013634	38.0	97.0	2.1834149571873667	0.011614292165293737
1.2714256578755379	0.2501382150670455	1.324733954317953	2.328179630475568	1.0567539726000303	28.0	96.0	2.203142539173362	0.011870446226152727
1.3141104196035938	0.015237373973481905	1.634363772622952	2.925832489653744	1.6117220700501502	2.0	83.0	1.8153455512107644	0.010364387849508116
0.9399791800654425	0.5760417827172843	1.7853814540860655	2.122353168987634	1.1823739889221916	68.0	95.0	1.7949931145916806	0.008883982210838632
1.553959891783697	0.5036528332826109	1.7937499565912771	2.8010842483696092	1.2471243565859123	41.0	91.0	2.24603443399804	0.012828352152682208
1.0439932684524917	0.4165221207236576	1.5742411466824406	2.2206017990309914	1.1766085305784997	34.0	79.0	1.8872902425237343	0.011598940621941934
1.8820000828262784	0.6659029150013216	1.5609122623013763	2.77428712128809	0.8922870384618116	60.0	114.0	3.109186844258777	0.014355590499683579
0.994667902843984	0.41610914909496577	1.8298532575734965	2.3760692611537877	1.3814013583098037	44.0	83.0	1.7200426558585387	0.009427040279543199
1.0931619816785643	0.5173883296799325	1.2774133599536983	1.922171225827508	0.8290092441489438	56.0	112.0	2.318636661043265	0.010832828232469189
0.4288840532526116	0.23157537326002142	1.2026602837328841	1.3752281449266617	0.9463440916740501	36.0	57.0	1.4532009625525641	0.00946024958701998
1.4620855784067825	0.44546890059707933	1.6130802752288156	2.6243273786451273	1.1622418002383448	40.0	97.0	2.257987432655535	0.012113788211182468
1.1179079739411113	0.45030395860331396	1.5147630866291621	2.1110900052832258	0.9931820313421145	58.0	97.0	2.1255821578149687	0.011215031164709899
0.917896030826509	0.43708657548249286	1.6000570286827471	2.085713755927879	1.1678177251013702	42.0	74.0	1.785992549262628	0.011307108944460955
0.6298027699629796	0.26220240366454717	1.5040550687199095	1.8542705984072578	1.2244678284442783	34.0	62.0	1.514348156262433	0.009656402037223637
1.1992012763711242	0.6519527266044802	2.0114373985133125	2.507539794349485	1.3083385179783606	48.0	73.0	1.9165833306078346	0.012856667480126954
1.3528169833387356	0.3194743880829667	1.3105317214722936	2.2821828030633187	0.929365819724583	52.0	123.0	2.4556345355369773	0.010537364754964865
1.1933984090675378	0.41045156858177223	1.4150350041927082	2.200953387187817	1.0075549781202793	41.0	95.0	2.184449915868584	0.011866000301765888
1.1892763843681209	0.5222064355450059	1.4044263351210038	2.1316937972239565	0.9424174128558357	61.0	128.0	2.261942286024004	0.009199704055489253
1.1679293257792507	0.46597436366462286	1.435163438714163	2.10783129997722	0.9399019741979692	52.0	93.0	2.2426075887071737	0.01252878709513234
0.9419116500626161	0.4607536796269347	1.58112780152274	2.0262125492632848	1.0843008992006686	60.0	96.0	1.8686810559291984	0.009396045341321447
1.7849447688566225	0.45120785230443405	1.661668688141776	2.94417656319358	1.1592317943369574	48.0	119.0	2.53976519413665	0.011299959020248072
0.8120191930891101	0.7008585218193593	1.947122750638276	2.1105298550824876	1.2985106619933775	40.0	48.0	1.6253465734679131	0.014598903698606927
0.618982149878907	0.9632960303779297	2.3044642246512486	1.9459395603091547	1.3269574104302477	68.0	47.0	1.4664672317389678	0.011752017752860156
1.056510441453126	1.381696746057375	2.858594588155302	2.2548404862185216	1.1983300447653957	75.0	61.0	1.8816523011070505	0.014950820754075559
0.7956058049196235	0.9257104392965341	2.4819703970252096	1.9321465463289151	1.1365407414092916	65.0	57.0	1.7000240078794584	0.013430791585357382
1.069854585768533	0.5609068912379951	1.9914068142290486	2.440150138424063	1.3702955526555298	48.0	72.0	1.7807473239588607	0.011562261420285377
1.0882410175863346	0.32446299805748824	1.539014184583449	2.2524873688102347	1.1642463512239	31.0	66.0	1.934717138209052	0.0144261008362086
1.2713907166024945	0.7178270478031028	1.809989761862646	2.444365081904534	1.1729743653020397	45.0	81.0	2.0839032413765604	0.013077633244032822
0.9598738918889389	0.28811212722956814	1.3859263626251264	2.042654198315721	1.082780306426782	30.0	70.0	1.886489979723182	0.013081491959313758
1.4412307129141129	0.48567315638061026	1.7156256911157095	2.6178264825806434	1.1765957696665306	46.0	93.0	2.224915769774172	0.012405921720171952
1.0891417670312904	0.12058390634597926	1.318239851298513	2.2652904528546496	1.1761486858233592	13.0	70.0	1.9260238778984309	0.01350893698738642
0.8410979827623803	0.5130966798779442	1.493498333141253	1.8778667639717792	1.0367687812093989	61.0	97.0	1.8112686242165132	0.008835056951013113
1.5181474257893794	0.765714665937306	2.040076523766956	2.839248880137169	1.3211014543477895	66.0	115.0	2.1491527927647835	0.009597983078040514
1.7130892507403006	0.3750523245342874	1.3157806017191382	2.602532483907986	0.8894432331676856	48.0	121.0	2.926024266483271	0.012801171357614122
1.176964141213699	0.5532870820624893	1.7434437443986266	2.388707201162744	1.2117430599490449	54.0	98.0	1.971298437857933	0.009991287803107159
0.938792112270832	0.68468907632163	2.084339917408129	2.2889264304398957	1.3501343181690637	55.0	66.0	1.695332382591342	0.011538911397637255
0.9155732676339561	0.5475910290400032	1.5413413122306157	1.9763651518217318	1.0607918841877757	42.0	73.0	1.8631035750570337	0.01229736821778346
1.3919950780129402	0.10769365891244131	1.407102981600233	2.709770440176126	1.3177753621631858	9.0	99.0	2.0563219786777007	0.010505718982382384
0.8788233435702614	0.15728462794899833	1.1328665564926261	1.8742333118377945	0.9954099682675331	18.0	87.0	1.8828757713767066	0.010493538123798642
0.9589849752994687	0.09640480199827284	1.1092397789502773	1.947267555925696	0.9882825806262273	16.0	87.0	1.970355032152652	0.011246616182098861
0.9022726511510926	1.1118288248042694	2.641844080763138	2.314311241908096	1.4120385907570032	68.0	57.0	1.6389858301729403	0.012505322485846687
1.5569366789412833	0.5977775617137091	1.6498464258319103	2.490588298455689	0.9336516195144056	66.0	108.0	2.667577762839473	0.013106762294604914
0.8198508190472329	0.32518698737887775	1.5352028426521698	2.020299916032594	1.200449096985361	39.0	80.0	1.6829534222701246	0.009387440611573296
1.2224028302548828	0.459732513985726	1.5246330660548832	2.28582910626324	1.0634262760083573	45.0	91.0	2.1494946644004838	0.01213184098005381
1.255256706482723	0.1897955925778394	1.2875574499769875	2.395152974505145	1.139896268022422	16.0	99.0	2.1012025757926525	0.01082035614300049
0.9930448530454055	0.7997690211071495	2.1306343802087566	2.2609106010930047	1.2678657480475992	68.0	75.0	1.783241328645881	0.011126692775948348
0.7484929412142171	0.417668541458486	1.4184255692826435	1.7133605803064091	0.9648676390921921	55.0	79.0	1.775746756227047	0.010486403163785674
0.9949929520372498	0.5362663299001837	1.670328215392332	2.0628328648837666	1.0678399128465168	56.0	80.0	1.9317810095568722	0.01187414445917671
1.189456427875931	0.5891551681605057	1.3476151346064256	1.986211811361515	0.796755383485584	69.0	122.0	2.492875294638599	0.010801727165858898
1.1546586412899924	0.5211619678300927	1.5921259968487291	2.2345010506937735	1.079842409403781	51.0	94.0	2.0692843985702694	0.011160978086467477
1.5170297107059152	0.40922952973951565	1.986434631399632	3.032345938296555	1.5153162275906398	36.0	91.0	2.001130775929193	0.010997971999022749
0.8556237265771183	0.5986732208192975	1.9070587237313281	2.1960687229984552	1.340444996421337	41.0	58.0	1.638313193649442	0.012279503120548322
0.894889006472102	0.761058376839612	1.9512534342622587	2.1098217703716085	1.2149327638995064	69.0	80.0	1.7365749225494778	0.009953058193738257
1.4300868443074113	0.32268806688920226	1.394866850222046	2.4761900791339597	1.0461032348265484	40.0	114.0	2.3670609139685244	0.010904358183144029
1.5752121875752438	0.7634712055579926	1.9937548672692804	2.7900187299641424	1.2148065423888985	58.0	98.0	2.296677398919513	0.01224028799859497
0.9233939671788827	0.7965670169123391	1.8831795265965448	2.0864203694575725	1.1630264022786898	57.0	69.0	1.7939578717814995	0.012219507409851072
0.7033540977340892	0.5550844147825431	1.2877961674494993	1.5256208037263017	0.8222667059922125	53.0	73.0	1.8553843815010922	0.012215316467438198
0.9945704034787199	0.26097068942955226	1.47830377265705	2.225974285293817	1.231403881815097	24.0	74.0	1.807671973562985	0.011542336554713001
1.1622259259111933	0.39819165466438333	1.6347407862309176	2.3861208530323323	1.223894927121139	31.0	72.0	1.9496125036198946	0.013377602899520618
1.1177210237064958	0.10173318765770056	0.9153362371391728	1.9429185487080736	0.8251975250015777	17.0	143.0	2.3544890645477383	0.008639258895376565
1.105622077151289	0.5541873619525826	1.7114835358505391	2.2821972463617337	1.1765751692104447	64.0	107.0	1.939695232471403	0.008932990579717045
1.1065174732833314	0.5163165699357333	2.077113267347239	2.6148327381378795	1.5083152648545481	44.0	75.0	1.733611532725578	0.010583742080010183
1.3078068923992567	0.3166892805497785	1.4845527720737903	2.465233783406613	1.1574268910073562	39.0	114.0	2.1299261340481026	0.009568450864716837
1.3654050537649647	0.4846358958569945	1.5375136942636753	2.384261373577209	1.0188563198122444	52.0	105.0	2.340135038880244	0.01168182651222612
1.295209921233983	0.5653393637877902	1.7190854832586115	2.531655891463834	1.2364459702298511	31.0	77.0	2.047526501294034	0.013427040583126503
1.0774296160970585	0.6281400040387899	1.6956689927106987	2.1915768090452317	1.1141471929481732	62.0	98.0	1.967044231602868	0.009959483662202825
1.1495910576818285	0.7567434297267674	1.8213498532889705	2.170863035292533	1.0212719776107047	63.0	82.0	2.125646334066005	0.013267092446656175
1.6650533825569571	0.37624177366912326	1.6435181488888342	2.9474573056510267	1.2824039230940696	37.0	130.0	2.298384504735189	0.009235539781879173
0.9164204036654895	0.312723882588561	1.6879555783366602	2.2598903743080045	1.343469970642515	32.0	70.0	1.6821294287859752	0.010718410224998587
0.9844975078558167	0.35625651344606224	1.5300444203315908	2.155122821730821	1.1706253138750045	38.0	84.0	1.8410013829249365	0.010482032266822339
0.7225437754115935	0.6419363878316127	1.7857458252051923	1.8473224647022988	1.1247786892907052	67.0	71.0	1.6423875045741092	0.01008161347116218
1.0447665022155552	0.5868621718674409	1.8788238790593363	2.296999240441501	1.2522327382259457	62.0	91.0	1.8343229419921487	0.009618106100869874
0.7985861481590882	0.904059836932739	2.1141183053415253	1.6880198711501904	0.8894337229911021	82.0	74.0	1.897859084399791	0.012491525358931038
1.6488762495010747	0.3167592113676754	1.5016674538977783	2.7890697971660283	1.1401935476649536	42.0	134.0	2.4461371517825827	0.00963063653880198
1.3106172498183306	0.391578797389349	1.3559382001113391	2.2370385293379567	0.9264212795196262	43.0	98.0	2.414709785701296	0.012978059262659073
0.6726034662123266	0.5804543427001251	1.5828951175514472	1.6736363137567758	1.0010328475444492	47.0	52.0	1.671909486149465	0.014259552786462732
0.751584600659384	0.13898681380736155	1.0151094286924618	1.6420369667353305	0.8904523660759465	19.0	90.0	1.844048069602503	0.009809736262400977
1.454181932978763	0.3473975488934069	1.6866478625935173	2.6746838386313074	1.2205019056525443	34.0	73.0	2.1914622388084526	0.015505394793546548
1.3140641247552582	0.6390840230248496	1.4726440121750841	2.2036148962847535	0.8895507715294954	56.0	101.0	2.4772221741720863	0.012957656090229981
0.8853576663944174	0.5660563299975201	1.7124721502566904	2.0077046591430046	1.1223469927485872	53.0	71.0	1.7888448689350596	0.01181729972301921
1.2468741712445655	0.48352952801216165	1.729875335889302	2.441612378457776	1.1947382072132104	53.0	101.0	2.043637981707277	0.010209303505719369
1.0574821251921325	0.8244613483298338	1.8296800927681875	2.00826580328344	0.9507836780913076	65.0	74.0	2.112221580533462	0.014577853880319817
0.8800465387642309	0.49457808914758905	1.9635711316497928	2.3059692288381473	1.4259226900739164	30.0	45.0	1.6171768952765675	0.015410611044020982
1.2237410009182692	0.7387729228706146	1.8260185199412062	2.3211253556175304	1.0973843546992612	81.0	113.0	2.1151434733673016	0.009564208202139513
1.4939942418524437	0.6298692808114994	1.8647194811228907	2.7426019099463055	1.2486076680938618	57.0	116.0	2.1965281649544823	0.009786422400759527
1.1516942410140942	0.5723056862769222	2.0138762666259535	2.5967377550835535	1.4450435140694593	44.0	78.0	1.7969962356155977	0.010840863931589673
1.1945059366493385	0.5226250270882602	1.4880557803520877	2.149442640930183	0.9549367042808443	55.0	99.0	2.2508744624586527	0.011823086827403857
1.8690355059320523	0.38035990266502884	1.7388587561492275	3.1267507718886205	1.2577152659565682	44.0	121.0	2.4860561500066853	0.010858337863100797
1.240920067582792	0.13660532826241067	1.2437896958412618	2.3341647060457666	1.0932446384629746	17.0	96.0	2.1350799481874785	0.011398855131805299
1.1957573437667683	0.3717960779213004	1.2413050223662148	2.0344952825267484	0.8387379387599802	43.0	90.0	2.4256626396733862	0.01420421016532889
0.95513048396846	1.0583946994810647	1.9907986491855063	2.0502028600630573	1.0950723760945973	78.0	81.0	1.8722076319510332	0.011169635084598395
1.4112881010197398	1.1590959410243467	2.3797030730452526	2.6749254468454353	1.2636373458256955	70.0	83.0	2.1168458305555737	0.01303513496373199
0.5065356248283237	0.7457913027860563	2.6738243092758136	2.0485596362301086	1.542024011401785	51.0	36.0	1.3284875080303418	0.01138290727810493
1.206359295283924	0.9744464513559006	2.026521475138052	2.337278346392566	1.1309190511086422	68.0	83.0	2.0667070239035477	0.012618480566414542
1.0517923033916987	0.7322911357364379	2.0883265688906487	2.3217803269073514	1.2699880235156527	61.0	73.0	1.8281907261456434	0.011923514897596127
1.2426859747213574	0.668808184108594	1.8373693574745038	2.3810820497909644	1.138396075069607	50.0	77.0	2.091611260733988	0.013826165486270215
1.334439068144123	0.41033481914187797	1.3147772697447215	2.2028882692187595	0.8684492010746365	55.0	121.0	2.5365770001202845	0.011098206243507052
1.0544106139226044	0.6271997931896867	1.8519221766910265	2.2699746520231305	1.2155640381005262	42.0	64.0	1.867424982043937	0.01407891075654769
1.0526513493640435	0.45508522802542917	1.7399476268230047	2.2899296005780143	1.2372782512139708	40.0	68.0	1.850779805052923	0.01306078326481692
1.2946421552642977	0.2388901269275685	1.2753333881721238	2.342077133365002	1.0474349781007042	28.0	114.0	2.2360119552354933	0.010183578086204202
0.9838064060388798	0.8595661625244166	2.1444828597577117	2.2878981314428364	1.3040917254039566	59.0	66.0	1.7543996997098767	0.012287537427070718
1.1190592316189374	0.8326445876081365	1.8179006865347627	2.1142584435297147	0.9951992119107772	60.0	75.0	2.1244575138583057	0.014494593227759605
1.6385195478798127	0.6421800533964053	1.960803140550254	2.896224484894089	1.2577049370142763	52.0	94.0	2.3027853351435272	0.012801914147484897
0.5999846357027265	0.31737288513943307	1.7880339391209112	2.0784342108235383	1.4784495751208118	23.0	41.0	1.4058201549780274	0.011985659605595467
1.0321931710545336	0.5218168655926919	1.1948056126562185	1.7583201125852295	0.726126941530696	56.0	101.0	2.4215051281235223	0.012632713447513835
1.2288726697031744	0.593285052849208	1.818291333711979	2.428133708741998	1.1992610390388234	50.0	84.0	2.0246915639718304	0.01211550176763344
1.5534971642026951	0.5912852064165555	1.803634623717913	2.7214515502356207	1.1679543860329256	59.0	113.0	2.3301008864561092	0.010799932926082775
0.5432875217338855	0.5839293267237518	1.582883732138461	1.684189736887842	1.1409022151539565	53.0	49.0	1.476191135855208	0.011466929230706305
0.7579562558487284	0.37838941593598696	1.1869436841101362	1.5749200827035092	0.8169638268547809	45.0	77.0	1.9277721129548355	0.01229785086814417
1.1956314150399212	0.4761647195884786	1.600173920330314	2.3320253515340545	1.1363939364941333	42.0	89.0	2.052127591184216	0.011653038577574298
1.4755880826670382	0.5104061329469154	2.0127082012536808	2.9626710904907734	1.4870830078237351	45.0	109.0	1.9922701523074229	0.00912305771066297
0.9223333080233487	0.46226144585496987	1.6209763352433106	2.1128512682080984	1.1905179601847498	41.0	78.0	1.7747327960346075	0.010610279854398151
1.2425776052887574	0.23425425291592217	1.3030663793372945	2.290558000835772	1.0479803955470148	24.0	84.0	2.185687834017323	0.0134296115003104
0.6603856219209094	0.266075353194962	1.4736579228565632	1.8716741555629741	1.2112885336420647	26.0	58.0	1.5451926634980044	0.010823909187079874
0.6599832237353899	0.5436542729821923	1.4723029577353046	1.6258337838064751	0.9658505600710853	50.0	60.0	1.6833181560580304	0.012521797990884391
1.5441765841401123	0.5906802795332902	1.8152927291779828	2.7166055766445263	1.172428992504414	59.0	108.0	2.317074717541411	0.011225042285307388
1.170158872835441	0.8516800347422973	1.9632676492288927	2.306781246019835	1.136622373184394	65.0	84.0	2.02950540165516	0.012156287855518038
0.749970808662808	0.3491846309089244	1.2051706542347635	1.5801492664172156	0.8301784577544077	51.0	83.0	1.9033850513194988	0.011187559586849916
0.7380060410745084	0.503001180590919	1.2834690664307766	1.5644210935834146	0.8264150525089062	52.0	73.0	1.8930210538082557	0.012612198034269275
1.164227473965133	0.3216108880345905	1.517739188784282	2.3344369156421045	1.1702094416769715	34.0	88.0	1.9948881221610502	0.011321679989938794
0.6583255822739307	0.3789889494705798	1.3700840735100928	1.677575963854566	1.0192503815806353	33.0	53.0	1.6458919164229413	0.013563577339001062
1.2702656223896742	0.2048632571335165	1.3662337321960991	2.3998315448650884	1.1295659224754142	21.0	80.0	2.1245608575070327	0.013589558373458873
0.12988249109423267	0.5384883857374578	1.688191324064975	1.277150479920848	1.1472679888266153	62.0	17.0	1.113210245870341	0.009101534838652966
1.2167890712683607	0.38590712347752576	1.6298693655819443	2.4403148638126613	1.2235257925443006	51.0	124.0	1.99449400959343	0.00803244185756186
1.0082799212255462	0.5702401815483422	1.551111865791917	2.072233091257981	1.0639531700324347	46.0	87.0	1.9476732149731821	0.011054616541154333
1.2772066407591134	0.6704219194875614	2.315749857620003	2.845730695314909	1.5685240545557955	42.0	64.0	1.8142729064622583	0.013427991956034927
1.0695014779810585	0.5626681703991163	1.4795107424991136	2.0168882616752013	0.9473867836941428	50.0	86.0	2.128896345598948	0.012675647764386094
1.077366836756425	0.19884172472073103	1.3794265169453503	2.2273397803671315	1.1499729436107065	25.0	82.0	1.9368627694610698	0.011630752924137977
1.2620474267377357	0.3838258621990738	1.5493272077187958	2.4224705952887233	1.1604231685509876	43.0	108.0	2.0875751716622872	0.009831742117072523
1.0214124759352943	0.692140958514611	2.0054719074582223	2.308641395952549	1.2872289200172549	59.0	75.0	1.7934971472841075	0.011237006007508765
0.598273260982175	0.7099158990280627	1.8838426970769284	1.7997754705880213	1.2015022096058463	55.0	47.0	1.4979377118069879	0.012403779446522979
0.9510347399534251	0.4477759340755052	1.6764217457593829	2.2354961172260333	1.2844613772726081	33.0	68.0	1.7404152096599648	0.011756346027944889
1.5229006837859294	0.638855814874008	1.7392385621924054	2.6078134994477207	1.0849128156617913	56.0	109.0	2.4037078941287717	0.011607904458948902
0.957815667548045	0.4044170931691422	1.1467042881377305	1.7545024628687718	0.7966867953207267	37.0	76.0	2.2022487044767094	0.014986544797653928
1.0189262988575325	0.3423664873473323	1.2609404925556271	1.936738973113755	0.9178126742562226	38.0	89.0	2.1101680412980244	0.012105144844995051
0.8956298816941208	0.343608559280993	1.4279993145791239	1.9723358629855376	1.0767059812914168	38.0	78.0	1.8318240051196608	0.011195908990837678
1.579775969659696	0.5308573646451167	1.9417159433699362	2.992525860858869	1.4127498911991732	33.0	79.0	2.1182276349841	0.013707058691728412
0.9527082455145908	0.9312015630118629	2.3354594555072143	2.2907535970773694	1.3380453515627786	57.0	57.0	1.712014913696213	0.013608688936701951
0.7524072611647323	0.6710325115130207	1.8503798730697574	1.9229997071289213	1.170592445964189	57.0	61.0	1.6427576598147209	0.011739666706670808
1.3404010111369042	0.23235205938693415	1.1934883044085143	2.2996976422742175	0.9592966311373132	27.0	105.0	2.397274802839415	0.01201328853849671
0.7534347597400745	0.43022154174185656	1.3430585661037395	1.6976661871607908	0.9442314274207163	44.0	75.0	1.7979344235535284	0.011284538694498584
0.9109178991302784	0.18906172298385182	1.6306024296371353	2.324309542702428	1.4133916435721494	19.0	62.0	1.644490791545973	0.011574853705046767
1.326184426043126	0.03393255698989717	1.179727761876695	2.45342236340891	1.127237937365784	6.0	99.0	2.176490235186952	0.011333369166625465
1.4898439857874397	0.4629870345755447	1.6442573636396305	2.614422240999778	1.1245782552123385	61.0	126.0	2.324802412710828	0.009659588137557525
0.6762124372124797	0.35668916709184817	1.2870370132411748	1.640299973747758	0.9640875365352782	38.0	68.0	1.7014014926929153	0.011275347425493768
1.776955381340636	0.5071955565046358	1.4556836607157706	2.7578371229893968	0.9808817416487609	60.0	160.0	2.811589823614983	0.009321163364337021
0.8742319489383386	0.36821556505936504	1.4788817055839167	2.063553403878538	1.1893214549401994	27.0	78.0	1.735067836628152	0.010192206019492741
1.3190967648120968	1.1210330818346537	2.238504658834895	2.4393842339531644	1.1202874691410676	77.0	86.0	2.177462750541571	0.013054046966443055
1.4489983124030377	0.8292963816058168	2.1595661573391247	2.7310771955572513	1.2820788831542136	71.0	104.0	2.130194351878071	0.010490240992055857
0.7564609342668216	0.5281771411857028	1.8355155486839259	2.0358761406605894	1.2794152063937678	50.0	63.0	1.5912552316765292	0.01063754376793109
0.9658516106978237	0.4893984798839003	1.246315235020893	1.7686046545093885	0.8027530438115649	60.0	102.0	2.2031740248680314	0.011172386818637334
1.4672003769269275	0.6074239231624914	1.9282558894167527	2.846293654941743	1.3790932780148153	40.0	92.0	2.0638877009385044	0.011362657324024299
1.2703100213437095	0.2712235263226682	1.3429818669638658	2.3172661810717425	1.046956159728033	38.0	121.0	2.2133364033826375	0.009472915222887129
1.8095454115084584	0.13305926610576546	1.156151859100591	2.8126717037333457	1.0031262922248874	15.0	106.0	2.8039058745982732	0.014032433205406574
0.9911539488580585	0.4985814823958781	1.2663164407953313	1.746020268600733	0.7548663197426744	85.0	131.0	2.3130191703293	0.009234940634325417
1.1202887828901242	0.5359828387364376	1.6987531636487092	2.2915889416702284	1.1713001587801042	53.0	91.0	1.9564489294160878	0.010639971989352157
0.8989304288151367	0.4411838368122576	1.5836851928045024	2.030143013135245	1.1312125843201084	49.0	85.0	1.794660916325838	0.009926015136950666
0.8827677572471299	0.33196887837614597	1.2660294056652992	1.8133059153981823	0.9305381581510525	41.0	86.0	1.9486636840354394	0.011191687444541734
1.2722338726907758	0.3827925770836673	1.4309919897835957	2.3678361953105234	1.0956023226197475	42.0	124.0	2.161218670702227	0.008966492342986344
1.3978213787060954	0.4408614139466931	1.5903716151564153	2.4948439625251635	1.0970225838190681	44.0	93.0	2.274195626711581	0.012745767316684056
1.4977562816633276	0.2976619344438166	1.2389191301155589	2.4375717889557267	0.939815507292399	37.0	128.0	2.5936705343140716	0.010742150236592871
1.1339622749854015	0.7927429336670435	2.0050763449046864	2.350113917351853	1.2161516423664516	76.0	99.0	1.932418487532425	0.009600076366418018
1.1131785770122276	1.2419661185076531	2.0939074354205696	2.223469146377054	1.1102905693648266	81.0	74.0	2.002601127783201	0.013538852675655813
1.2630349543326889	0.19679680219718687	1.392801427520106	2.4190173227209284	1.1559823683882395	25.0	93.0	2.0926074556774688	0.011454857067358422
1.5798590988728363	0.09291235847984336	0.8247803055926631	2.3115600702745973	0.731700971401761	14.0	133.0	3.1591594935923215	0.01247775018757006
1.534733720415716	0.005414181725253875	0.8797399643397139	2.402140543929713	0.8674068235139969	2.0	142.0	2.7693355399237887	0.010348872288682268
1.2134709931969943	0.9886767109260866	2.187668816742157	2.4237040147172304	1.2102330215202362	66.0	77.0	2.0026754944041194	0.013012060668887689
1.1647985864074648	0.4755013676749169	1.4992786840671002	2.209209550892056	1.0444109644845911	57.0	122.0	2.1152684393564214	0.008859350500052902
0.9117406271077497	0.599047891686286	1.7147275528633137	2.006298756634634	1.0945581295268845	59.0	81.0	1.8329759768006506	0.010792442936670785
0.9118514283464889	0.6179308281490385	2.071198684282897	2.322273207380199	1.41042177903371	47.0	61.0	1.646509747581468	0.011793623818471682
0.9668108274289589	0.29884095918524656	1.544587439683049	2.2101394941537724	1.2433286667248136	24.0	64.0	1.7775987583200665	0.01296765178274113
1.0520603021663937	0.629877290674258	1.8913165560519267	2.372357976064855	1.3202976738984615	39.0	68.0	1.7968356855919927	0.012433213020715818
1.0199134853174414	1.394524747812416	2.9831699231680235	2.311580261928819	1.2916667766113774	79.0	62.0	1.7896103730353219	0.013542669738065016
0.9640888046800326	0.8963195031094854	1.8289644164619037	1.886929089986641	0.9228402853066086	86.0	89.0	2.044697354493708	0.011594239536241236
0.7550147088907277	0.7550147088907282	1.8898283783511551	1.8371066817791053	1.0820919728883776	72.0	71.0	1.697736170129238	0.01075510253635055
0.9642923437300566	0.8169252687274308	1.6065404703741133	1.8293212956209315	0.8650289518908749	75.0	90.0	2.1147515255092917	0.012005424029424254
1.0669664938549013	0.26162597829410195	1.137296465892645	1.9522720475106465	0.8853055536557454	36.0	115.0	2.205195753544087	0.009920928073087672
0.9290297495848343	0.3430602584292546	1.6959744435768445	2.256324599631305	1.3272948500464705	33.0	70.0	1.6999422543923135	0.010935510572271103
0.626776831256928	0.457068405778158	1.4600439770811087	1.6885082404604237	1.0617314092034957	36.0	53.0	1.590334641910172	0.012628874956526984
0.90022938186761	0.33401275666376185	1.2592294723123842	1.832403561286606	0.932174179418996	49.0	107.0	1.9657308706283878	0.00911276462589299
1.2326360602055524	0.11820136611934151	1.006660293138158	2.084890048355614	0.8522539881500614	22.0	114.0	2.446324777993899	0.011321192553367611
1.3247907007042112	0.5735800291923953	1.452826669415509	2.251759510026587	0.9269688093223759	54.0	109.0	2.429164268938722	0.011747339940989532
1.018556069260197	0.2719539787347426	1.206835701999629	1.973586581395192	0.955030512134995	36.0	112.0	2.066516782781305	0.00935000964557407
1.1554017709969526	0.8487497811943188	1.9836137221852967	2.3387188782019854	1.1833171072050328	63.0	82.0	1.9764092515538667	0.011986362367760142
0.9373889403881648	0.8094793473445749	2.130409210666172	2.2465560821749726	1.3091671417868078	60.0	66.0	1.716019299956441	0.011804026951896106
1.2243056671939891	0.4647506209567204	1.5702567427817538	2.2933524036656348	1.0690467364716456	42.0	83.0	2.145231190953139	0.013266664276339131
0.9912454720069204	0.4748206903158516	1.5559502235840483	2.0549555982363903	1.06371012622947	49.0	79.0	1.9318755623024717	0.012025343911423058
1.169109364026459	0.7950455603311983	2.0318621243585686	2.4579025856823296	1.2887932216558706	59.0	82.0	1.9071349417281702	0.011358621060510686
1.482725832937848	0.30825423330630075	1.3076910932767294	2.449403835804514	0.9666780028666657	37.0	106.0	2.53383632247848	0.012653993718089881
1.5222272807608124	0.6728811426629465	1.4799337784098472	2.4606946883960634	0.9384674076352509	58.0	131.0	2.622035318835972	0.01061593220460978
1.1094587435613283	0.4025773745638026	1.4510260522103156	2.181087350333432	1.0716286067721035	32.0	71.0	2.0353015368852225	0.014440035922983938
1.3119744626032823	0.13807632179187745	1.240421879164896	2.39434728458577	1.0823728219824875	17.0	95.0	2.2121280541766133	0.012057209492076495
1.0408205569808087	0.18919703525859832	1.4158220767636651	2.238054471999597	1.1972339150187885	20.0	71.0	1.8693543875797027	0.012711832360108456
1.1270621962845486	0.5358650324308765	1.6052901151503989	2.2295293778228285	1.1024671815382798	47.0	88.0	2.022309067478953	0.011545494315181492
0.8021560246806068	0.6831009919362547	1.8120801189800175	1.9232801980881464	1.1211241734075397	61.0	68.0	1.715492577635301	0.011450336527182418
1.198421083017416	0.8913107388181856	2.0832953152198503	2.4186845878012924	1.2202635047838764	69.0	89.0	1.9821002417257993	0.011090223893168162
0.7069973619159478	0.5155305145634728	1.6108187385538877	1.831799800464778	1.1248024385488302	53.0	70.0	1.6285524796941977	0.010051288728112374
0.9499156438080453	0.5475802686389825	1.3350736988732557	1.762304808260105	0.8123891644520597	64.0	96.0	2.1692864520771207	0.011637714291741246
1.4323353775357752	0.38370227918178834	1.7575315356123582	2.8141475680043677	1.3818121904685925	33.0	97.0	2.036562991277454	0.010578726163517238
0.7358165587332802	0.6541100495869941	1.4722292435660265	1.5856975562011915	0.8498809974679112	63.0	71.0	1.8657877525506885	0.012673026451634654
1.125711746796732	0.9265660809810239	2.0357179198897875	2.276632304044415	1.1509205572476833	88.0	105.0	1.9780968284107847	0.0093725052206119
1.7329251765817573	0.5628008707138732	1.702410822629318	2.8265319248725627	1.0936067482908054	51.0	106.0	2.584596272188463	0.012923952277638961
0.9507564419881714	0.3899698210838658	1.2563118852937158	1.7941926061626277	0.8434361641744562	58.0	103.0	2.127241731351132	0.010572660046429698
0.7416498520743247	0.7765390853965441	1.9454715578439044	1.8332639630690162	1.0916141109946915	58.0	55.0	1.6794066186983647	0.013599119610031823
1.3163647176130704	0.552869728478186	1.7027649017402229	2.483138062270002	1.1667733446569315	48.0	97.0	2.1282094535679708	0.011233403552724161
0.7871834018983156	0.4596163610534454	1.3096753028207315	1.6892620272085985	0.9020786253102829	38.0	62.0	1.872632805846112	0.014597871568777756
1.3959247617369834	0.29182311749450585	1.5043442298694172	2.5919546620780483	1.1960299003410648	27.0	89.0	2.167131993388222	0.012536932879264601
1.0325848561217115	0.17700940349393568	1.0099847243066113	1.8850419456410414	0.85245708951933	24.0	115.0	2.211304203832652	0.00995563049490816
1.161029007299369	0.5817759314514876	1.9130732631072591	2.4793305849534066	1.3183015776540377	54.0	89.0	1.8807006128032249	0.010238991075190858
1.378624529194132	0.4220967586847457	1.7834679382731244	2.727458648906931	1.3488341197127989	42.0	109.0	2.0220860438255195	0.00931967328551256
1.504479175802154	0.5641855883184065	1.5259380918207868	2.443215869346232	0.9387366935440776	65.0	125.0	2.602663650146869	0.011039911040631793
1.2672179210620511	0.40878303278874006	1.3209318600659203	2.186791977955991	0.9195740568939397	48.0	110.0	2.3780487950501277	0.01136162107241888
1.0175953420546444	0.6657155138972716	1.5675469149808556	1.9487531484992804	0.931157806444636	59.0	86.0	2.0928280201398364	0.012388997230412748
0.9070274913956156	0.535278435948312	1.522330764408252	1.948701614744859	1.0416741233492435	42.0	72.0	1.87074015862014	0.012550127577330884
1.196517068824546	0.12811975195151293	1.1958562817709337	2.256886608534125	1.0603695397095791	19.0	117.0	2.128396303379533	0.009314246179044297
1.1646253692843305	0.7361069272653418	1.9724771252726283	2.3754428937886987	1.2108175245043682	69.0	92.0	1.9618504404790922	0.01056755503773745
1.142780510275806	1.2621580779276713	2.2775668631493424	2.2219449241620226	1.0791644138862166	75.0	69.0	2.0589494015656977	0.015100121396353772
0.6290494858763778	0.4217505515839104	1.3097854950409415	1.5846115063094959	0.9555620204331181	34.0	56.0	1.6583031477028092	0.013030495789249226
1.0549758830220193	0.13980176955785129	1.4250545238685115	2.30711512070901	1.2521392376869906	18.0	80.0	1.8425387938252134	0.011021187436687905
1.096743556083147	0.16651198257744215	1.532266508708763	2.4526644187991273	1.3559208627159802	19.0	90.0	1.8088551376710236	0.009500854158013198
1.28345890096195	0.8832918087479553	1.9208272135510087	2.3635744696780714	1.0801155687161215	67.0	90.0	2.1882607177744253	0.012553162628791668
1.1594782398829375	0.9396778297602941	2.0255074865525975	2.2142784105119224	1.054800170628985	63.0	71.0	2.099239715890008	0.01506854816804536
1.0384982335598143	0.6193907891541526	1.5815948335973422	2.008876854955326	0.9703786213955118	54.0	81.0	2.070199003422333	0.012960116756967928
1.161838717624753	0.45126584164713823	1.1507916856335894	1.929994615260563	0.7681558976358098	52.0	120.0	2.5125038045019243	0.011076048173845653
1.1261255450233922	0.31225466829757154	1.29536624882001	2.1669597476768803	1.040834202653488	31.0	109.0	2.0819451764291217	0.009705798888541006
1.116373163639444	0.053832112993284165	1.2514043403554167	2.3061219060335167	1.1897487423940727	6.0	76.0	1.9383268280603696	0.012563313804160831
1.265442764253579	0.07089557960447745	1.1109238084359798	2.303225580538112	1.037782816284533	8.0	93.0	2.2193714758007976	0.012367216821011875
1.4303358372410986	0.8513343411564189	2.3283005393479845	2.8917014707635955	1.461365633522497	63.0	90.0	1.9787665758865536	0.010940015952152047
1.5450026786721744	0.4433925359405271	1.6899944119475674	2.7493290420818135	1.204326363409639	44.0	100.0	2.2828770718744598	0.011908531755626497
1.253201058811453	0.6958349622016031	2.1079400598630498	2.5810671346197904	1.3278660758083374	54.0	77.0	1.9437706720902317	0.012452701538347332
1.2634620651926542	0.8143884967370971	1.863320939186227	2.373521562217532	1.1100594970248776	63.0	98.0	2.1381931045848606	0.01118767501711201
1.0528026612998893	0.49154814795877866	1.6306614690043346	2.1943844027076085	1.1415817414077192	42.0	74.0	1.9222315171243423	0.012740298749182097
1.1036877814646189	0.37812799985711254	1.4680122190455376	2.2283295436605957	1.1246417621959768	41.0	108.0	1.981368306392568	0.009134232225345349
0.9524056282192228	0.4826761965036428	1.5522124170611282	2.0184214431136835	1.0660158148944607	43.0	68.0	1.8934254210042036	0.013544097013141954
1.8362462270388589	0.8579784515031206	2.5346879079937876	3.4152858132437007	1.5790395862048419	62.0	100.0	2.162888025785473	0.01112958977909428
1.4325345055546281	0.9727966843158189	2.1826733782898873	2.5645108795271025	1.1319763739724744	80.0	98.0	2.2655162585482214	0.012039182086066276
1.204246937685312	0.2794013819038623	1.488322188680948	2.388992133573051	1.1847451958877389	41.0	121.0	2.0164607055299855	0.008362192499453787
1.2078845551209532	0.5593565427578291	1.5361481710287637	2.1922589459597313	0.9843743908387782	54.0	95.0	2.227058085178063	0.012159359856552187
1.1043050272211978	0.4154334378516942	1.652419253361466	2.3664260631886687	1.2621210359674708	37.0	91.0	1.8749596875031085	0.009965489860814105
1.5239127100710261	0.32529017270039084	0.9646034240429375	2.1248076643119176	0.6008949542408913	57.0	148.0	3.5360717365253636	0.012311807723497605
1.057433536983476	0.5232838799715527	1.3683340038241811	1.9406997499692917	0.8832662129858159	60.0	108.0	2.1971855386711785	0.010515339829076861
0.8274846524591095	0.3125198284188715	1.4594035720534306	1.9612883141694415	1.133803661710332	32.0	69.0	1.729830640351661	0.011458417351227677
1.4620986456421399	0.33958687768415385	1.2350002677311556	2.307505936098802	0.8454072904566622	46.0	117.0	2.7294606542278106	0.012381332482647276
1.3342905785192771	0.7387938964617973	1.5356296626985977	2.2033113292860858	0.8690207507668087	60.0	97.0	2.535395532663544	0.013837225066487007
0.8873495000352909	0.4691459805172926	1.6451902819446793	2.0314869267070725	1.1441374266717816	65.0	96.0	1.7755619905001538	0.008627872190598506
1.1508607474168504	0.45701088534938417	1.6739913093279215	2.359618355273281	1.2087576078564304	45.0	89.0	1.9521021749412173	0.010843017606174994
1.7027100029200803	0.3570934600159896	1.6870713394816554	2.991628561424879	1.2889185585047986	41.0	125.0	2.321037696047528	0.009718159629832112
1.063480411626535	0.6654538171243514	1.9995921311200402	2.366396162664805	1.30291575103827	57.0	80.0	1.816231142174056	0.010761847731428723
1.1646012081888946	0.3449665264574071	1.448478464429258	2.2555362356228796	1.090935027433985	44.0	113.0	2.067525726924528	0.00927349806595061
0.8037313496156298	0.4340387335916023	1.8782060327744292	2.272105273757622	1.4683739241419924	32.0	58.0	1.547361497232573	0.010858797948966834
0.7459290159347389	0.6754936716014341	1.7401091660429642	1.8714323980140088	1.12550338207927	60.0	69.0	1.6627514655324267	0.010631486123244098
1.0635768269751882	0.5337206706760607	1.6673005768714038	2.167795206972398	1.1042183799972096	58.0	92.0	1.9631942795390491	0.010578292938231208
0.566880246659456	1.028045850066239	2.3975116321701218	1.6716513440309189	1.1047710973714628	82.0	51.0	1.5131200915811531	0.011716205769905431
1.6152904528013021	0.3220455430215059	1.5687014010876468	2.789192832756692	1.1739023799553898	36.0	103.0	2.376000662732012	0.012121701345107852
1.0606118186617417	0.5497628304736428	1.8741866199828758	2.4170106795098416	1.3563988608481	41.0	72.0	1.7819321066065958	0.01157558846923159
1.0246325527492681	0.1132782135995547	1.050958091265672	1.933586449705045	0.9089538969557769	20.0	97.0	2.1272657020129584	0.011226806614331137
1.301471479401176	0.17550071248608812	1.5604164425056037	2.6662637796852606	1.3647923002840847	17.0	82.0	1.9536040605814318	0.011782172001147308
1.3825254003992118	1.12313375914369	2.464492858847505	2.7361205609077994	1.3535951605085876	73.0	86.0	2.0213728895719116	0.011806226571604567
1.6178739659159198	0.9129546711054459	2.0846232032759033	2.892980857960359	1.275106892044439	62.0	103.0	2.2688143841195196	0.01147513188642274
1.2797160098676	0.29543906854760116	1.6955350174285244	2.6870859895444874	1.4073699796768875	34.0	121.0	1.9092960830110963	0.007711081365362321
1.6742673959815253	0.3965572942542075	1.4938009022610217	2.7601719365310053	1.08590454054948	40.0	116.0	2.5418182109583287	0.011602248737093899
1.0495653416276538	0.31074501696746415	1.4649099202423723	2.1693177422952403	1.1197524006675865	32.0	73.0	1.9373191260870815	0.013069337292418286
1.0138697474996492	0.27629201246819013	1.247197110664567	1.994725037961665	0.9808552904620158	31.0	94.0	2.0336588458651046	0.010894443423630834
1.1034356721183975	0.47550605924259615	1.5158166069754018	2.1292624433091443	1.0258267711907467	54.0	98.0	2.075654977143524	0.010750680139302268
1.3190175821953027	0.9496522347793528	2.195180602113925	2.6041905587897594	1.2851729765944566	66.0	90.0	2.0263346695092594	0.011320805215383811
1.1750466854022659	0.24682075537382464	1.4039140187359995	2.290112442876376	1.1150657574741103	30.0	83.0	2.0537913818320694	0.01250951378702678
1.1248577443964727	0.6454512779804993	2.1245229789069797	2.621828856100863	1.4969711117043902	53.0	83.0	1.7514224794329902	0.0097412907677381
1.5199891756959834	0.8168778055414352	1.8705244347614973	2.569229794836639	1.0492406191406558	63.0	95.0	2.4486564358715714	0.01359989860630906
1.1233917801040942	0.8638839064206849	2.1351889312404073	2.364121760948151	1.2407299808440568	68.0	80.0	1.9054280926941585	0.011626439556933744
0.8922802691666158	0.6489150088241054	1.9247826760113018	2.2495487517680908	1.357268482601475	41.0	60.0	1.6574088182290827	0.012148825052567444
0.950524735495103	0.6158757464623117	1.8536302812561283	2.2003212216805768	1.2497964861854738	54.0	76.0	1.7605436133015677	0.010737117986830629
0.6361706973016557	0.43506334622620413	1.7317836090342793	1.917430663595966	1.2812599662943103	35.0	46.0	1.4965196088515926	0.012643721359777238
1.0607754729935521	0.27917917774758294	1.5479511574517681	2.327900430963701	1.2671249579701487	33.0	98.0	1.8371514319257392	0.008953781114235528
1.3898379142541102	1.4830551805753311	2.864138648642107	2.650185775932753	1.260347861678643	91.0	86.0	2.102741518046455	0.012468273441842363
1.2512782210688236	0.4882780122292072	1.6982496079860199	2.504853899089567	1.2535756780207434	33.0	75.0	1.9981672770202854	0.01331569818298468
0.9175379115198437	0.4357722840434617	1.8026251641936126	2.2722393361844535	1.3547014246646099	48.0	83.0	1.677298993574915	0.008989637170420547
1.2800631854366884	0.7809254575611002	1.9424507194949496	2.4859303198268163	1.205867134390128	54.0	84.0	2.0615292090899264	0.012425177409699397
1.35941608567899	0.41156560912026297	1.1850924156111464	2.158084829169118	0.7986687434901278	50.0	125.0	2.7021025259338867	0.011472659327287166
0.5742301614620975	0.5197023552382458	1.71317935449642	1.8401246811704084	1.265894519708311	41.0	50.0	1.4536161208711231	0.010792926490554345
1.380614172049245	0.16785765529046737	1.3524350236735558	2.541604050740683	1.160989878691438	25.0	124.0	2.1891698604688505	0.009115999188723876
1.5030625727817508	0.27487991798850364	1.26946156332654	2.4312733213229114	0.9282107485411605	43.0	121.0	2.6193117512850037	0.01148089074307777
1.5434993572830082	0.6041328816808005	1.8757868529083743	2.8006856601018697	1.2571863028188615	52.0	104.0	2.227741150076306	0.01111136163517747
0.7087767633890478	0.7087767633890476	1.7035974649256773	1.8337400263488934	1.1249632629598456	47.0	46.0	1.6300443638703488	0.015324157171627403
1.5407938098957437	0.13969390783564517	1.1415653726786354	2.4980479333982055	0.9572541235024618	22.0	111.0	2.6095974643161526	0.012466912480456087
1.1226883420329452	0.19194899364191698	1.3564417587091446	2.2683102635811165	1.1456219215481713	26.0	103.0	1.9799815461943726	0.009567834797811816
1.0369544681043834	1.0906727067199558	2.0370770026376217	2.2911574510824932	1.2542029829781098	82.0	78.0	1.826783608536898	0.011144945510187484
0.9759248253217214	1.1092913207784698	2.0630629571015384	2.1125560000093047	1.1366311746875832	90.0	81.0	1.8586117001321614	0.011039819690001545
0.9793097395954582	0.33638720356642726	1.5868715025236366	2.2038806866184086	1.2245709470229504	30.0	68.0	1.7997166207284716	0.012467202367190894
1.3486579560068546	0.5070275936375048	2.03952646845205	2.859729077400259	1.5110711213934043	38.0	78.0	1.8925178549923027	0.011798806556492682
1.183719759442898	0.4891566436373711	1.594121011966452	2.303581980456166	1.1198622210132678	42.0	88.0	2.0570226740677535	0.011824519277636747
1.3771163989563235	0.22572424353137932	1.2539690457898984	2.408673700105493	1.0315573011491694	28.0	119.0	2.33498778732136	0.010280798354888498
1.734337866705222	0.11617866335736005	1.3411287612191	2.941446645796123	1.2071087790909008	15.0	125.0	2.4367701542286757	0.010279761414340659
1.269660187848626	0.5162529773933595	1.581745288696446	2.4079439606718114	1.1382837728231854	40.0	95.0	2.1154162241104424	0.01137833213067754
0.981638132570329	1.4163620830729764	2.6824076523253106	2.0034210889750517	1.0217829564047227	94.0	72.0	1.9607110065961086	0.013491345962230589
0.6833728338330285	0.37454683939270006	1.5055376200272195	1.833427857977657	1.1500550241446286	37.0	61.0	1.5942088156532317	0.011030173958965338
1.3014135738288242	0.4690927646440244	1.7111762254722276	2.4573339850641838	1.1559204112353596	46.0	82.0	2.1258678029899762	0.01326892543562235
1.6376919993554497	0.7449622420988611	1.8738567823644197	2.7731064095148596	1.13541441015941	67.0	119.0	2.4423738017606462	0.010825916131117618
1.0684794022453352	0.45280587847229326	0.9994645366455872	1.647485382606733	0.5790059803613979	76.0	147.0	2.8453685082465343	0.010262690546834402
1.4202772568689956	0.22212107520945823	1.3450284560187102	2.5324812151188096	1.112203958249814	25.0	107.0	2.2769935283308755	0.01109467468274495
1.4022273913352086	0.24593971744261633	1.2823976128835965	2.4782742419448165	1.076046850609608	24.0	118.0	2.303128567813577	0.010199957195860795
0.852840880995984	0.46110032606429474	1.449566036706526	1.908475833804832	1.055634952808848	49.0	88.0	1.8078937503222428	0.00970806696871356
1.0063524860043878	0.40386236829174416	1.6053571764252812	2.224431283793897	1.2180787977895091	41.0	90.0	1.8261801189140239	0.009653656305992462
1.0578775542086762	1.0796775940200267	2.714608361706336	2.6763458823063973	1.618468328097721	64.0	62.0	1.6536288266153842	0.011703797478091993
1.4674498929708502	0.47063946241494414	1.6512812874619345	2.64602922507679	1.17857933210594	43.0	97.0	2.2451006504150577	0.012028661072942481
1.1172041496083345	0.19491834570887556	0.9950915665561725	1.909839053455451	0.7926349038471165	32.0	121.0	2.4094813945057116	0.01048531124745276
0.7586863818189618	0.3547931874628725	1.4285365749507426	1.8353103122733916	1.0766239304544298	41.0	74.0	1.7046902454589965	0.010398778580342268
0.7760859066821515	0.338529980266841	1.4392208935835302	1.836236171632988	1.0601502649508365	42.0	72.0	1.7320527403897237	0.011006706392835987
1.6476722975968037	0.22221468139069178	1.1909894999586217	2.5769086656204236	0.9292363680236201	32.0	127.0	2.773146590356999	0.011586802206331214
0.6125075885868139	0.44877111167328354	1.5922951256464855	1.7591679454977442	1.1466603569109304	39.0	50.0	1.5341665340527613	0.012349101922939084
1.106631305461645	0.5991388552108365	1.890323651793789	2.382076923906872	1.275445618445227	62.0	98.0	1.8676428766995434	0.009196108315989411
1.717009579152541	0.4051954246089524	2.141104332960558	3.3896390196151027	1.6726294404625617	40.0	108.0	2.026533156487851	0.0094353127757513
1.4651244645888852	0.11220660880875077	1.4626548421799048	2.779389509689309	1.3142650451004239	13.0	86.0	2.114786146105662	0.012564090474590566
1.3374923582485767	0.34158748258416693	1.4878198121389388	2.5015017060317555	1.1640093477831788	27.0	86.0	2.1490391901025463	0.012833625490030762
1.0081148037673828	0.32325394039750965	1.322120648890109	1.997703394436408	0.9895885906690253	34.0	80.0	2.0187211264085336	0.012668020315166433
1.2409692406790456	0.3340959362232272	1.560068202633449	2.4528648518056833	1.2118956111266377	31.0	86.0	2.0239902094582054	0.011827933853208948
1.2776233168361415	0.6587588839898344	2.018556422748482	2.5154632001077286	1.2378398832715871	70.0	101.0	2.032139401955128	0.010128706657337973
1.2805250832688444	0.3424999980068557	1.2578301532914673	2.1963362663646735	0.9158111830958291	50.0	134.0	2.398241369951531	0.009417737802010821
1.6567701589548443	0.5613645122072772	1.8024680098888355	2.781366728552434	1.12459656959759	75.0	136.0	2.473212886953479	0.009605782559228436
0.9248953497815944	0.8524233774106524	2.1629862607784243	2.1998689881702322	1.2749736383886379	61.0	62.0	1.7254231161598867	0.012692744992942378
1.359450221829889	0.26697695302279256	1.3207340331696706	2.3968518497607	1.037401627930811	31.0	107.0	2.3104377178792674	0.011291272892674961
1.3302765520477218	0.8124433446592862	1.841646516414095	2.363263208209599	1.032986656161877	75.0	107.0	2.287796453238266	0.011158492526123151
1.4099791253794165	0.7061113897342353	2.081497829871409	2.7407423709671463	1.3307632455877298	49.0	77.0	2.0595266513817045	0.013536529812677034
1.1823148863693573	0.6441166609414293	1.7536805093462142	2.274367394969718	1.0920525086003607	80.0	125.0	2.0826538807045845	0.008467384765601084
1.5032905819862403	0.43556955371238026	1.323483656325611	2.3143914009945963	0.8111008190083561	63.0	130.0	2.853395467932271	0.011635997783837457
1.1276647677470013	0.6563918553621337	1.768869247163424	2.2844673484097395	1.1568025806627382	53.0	89.0	1.9748117670181513	0.0110305072650601
1.2591920027597021	0.2798036739062921	1.411297308012273	2.3782810391207536	1.1190890363610515	39.0	124.0	2.1251937619317802	0.00877092244512845
0.9273393709378355	0.40314153862845825	1.4382853200753616	2.0096499585090597	1.0823105875712242	29.0	63.0	1.8568144685887678	0.014171899516575324
1.0057181015779464	0.3852417522780691	1.4979127965578196	2.124661863066573	1.1189437614886266	32.0	68.0	1.8988102317492288	0.013604348953984966
1.2490658718009164	0.509133042398328	1.6933073449245677	2.4751984992656717	1.2261326274647553	45.0	96.0	2.018703722437906	0.010556554034106807
1.431567331827961	0.5295548329977429	1.7829400241194346	2.6367919145346126	1.2052245827066517	54.0	103.0	2.187801304726955	0.010965841932730013
1.697817071442779	0.3452333991909742	1.270097999972366	2.625246266839027	0.9274291953962481	38.0	126.0	2.830670287145079	0.011913839013939073
0.7391461991182375	0.4121993373992916	1.6075387160917523	1.9282055502007431	1.1890593510825056	33.0	53.0	1.6216226283787496	0.01315920991797721
0.8792359405991441	0.48609875569212213	1.5998970101680974	1.976923378845744	1.0976874382466	51.0	80.0	1.800989343563591	0.010609870560711688
1.0511867697681063	0.7851199006779153	1.5174261980134645	1.8229397622322818	0.7717529924641755	73.0	94.0	2.3620767007481374	0.013192083109772613
1.4965702940225845	0.44140726959462173	1.4960160948092414	2.5005788786160554	1.004008584593471	54.0	118.0	2.4905951173998724	0.01115669923302568
1.2310124581808968	0.7390797513936933	1.6406193267957627	2.195109043547491	0.9640965853665941	58.0	90.0	2.2768559466609966	0.013189366857343775
0.6161341313592374	0.7340046991449345	1.8988030300387058	1.74192571938551	1.1257915880262725	47.0	40.0	1.5472896919041987	0.01574358328016042
1.3440799478259484	0.43755354209549535	1.388265003661215	2.268571071568637	0.9244911237426885	51.0	105.0	2.453859224071948	0.012333833191636952
0.828783506750651	0.07246119769932902	1.2337643483372718	1.979237702556595	1.150454195805944	11.0	82.0	1.7203967874358106	0.009545626126790923
1.0393482622790104	0.5925193918194767	1.914477707671072	2.3924398025541063	1.3530915402750958	52.0	82.0	1.7681285643598816	0.010027111950546735
1.3004642137163582	0.474766811032866	1.4324030224103002	2.246916068514484	0.9464518547981257	54.0	116.0	2.3740415924207174	0.010752975954650818
1.3412480993946052	0.4884325039668109	1.5091801771559414	2.272441017205697	0.9311929178110918	47.0	83.0	2.440354703886075	0.015507118768264702
1.3693636799095732	0.18686508485756947	1.394384548059094	2.6044451025650304	1.2350814226554572	18.0	114.0	2.1087234046200822	0.009441840993403759
0.9374300978265999	0.2079549715361355	1.3900599412189814	2.0940755611667003	1.1566454633401004	26.0	80.0	1.810473154945456	0.010704584815021526
1.129583551741058	1.2941857253948454	2.1359742974385236	2.3120047157658004	1.1824211640247424	87.0	78.0	1.9553140506181106	0.012402568500283696
1.4049739825907024	1.261255638213929	2.5221985784188212	2.578128997191189	1.1731550146004868	68.0	69.0	2.1976030150364747	0.016462765142843692
1.4901782507058916	0.35706596518952005	1.3737770469692838	2.4523526214562907	0.9621743707503991	47.0	115.0	2.5487611144159894	0.011737357925519635
0.8710772688640984	0.6806492436916012	1.7555359588319939	1.947150003833705	1.0760727349696066	56.0	68.0	1.8094966451210213	0.012582182836746503
1.2773075031242094	0.39168427601726696	1.349452689765864	2.2806928860336417	1.0033853829094324	35.0	99.0	2.272997917729784	0.011965619823415652
1.192598220833507	0.26942387001740076	1.2027371887705705	2.0988477729136146	0.9062495520801075	38.0	115.0	2.315971101002087	0.010535802185194044
0.6653694803152559	0.27311056782051546	1.3829914979413502	1.7725723732117882	1.1072028928965323	27.0	54.0	1.6009462986269802	0.012572683622164491
1.4819068666932138	0.3785032376227686	1.4585082646121028	2.5661124251470153	1.0842055584538015	38.0	117.0	2.366813566983164	0.010623470683767648
0.7751648573563394	0.18281965686024582	1.1033434918641027	1.7157911815184959	0.9406263241621564	22.0	86.0	1.8240943692988836	0.010083492663775891
1.3730683137138648	0.8921383340534133	2.100735825136428	2.5346020237826745	1.1615337100688097	77.0	101.0	2.18211662891172	0.011145823884352505
1.1832901593634322	0.38801042041342226	1.7834959059094901	2.53067799894463	1.3473878395811978	44.0	94.0	1.8782105082165717	0.009674029447571529
0.9498501201563858	0.34299730773027726	1.6354010022298542	2.199298335475326	1.2494482153189401	36.0	70.0	1.7602156764167474	0.011653603011619692
0.7558931910674993	1.1458051202026884	2.5545372516921616	1.9209597407938057	1.1650665497263064	64.0	46.0	1.6487982950373703	0.015682933003301362
0.7974321563412861	0.5146266379267954	1.4425555170807949	1.728667027165317	0.931234870824031	57.0	80.0	1.8563168984808895	0.011155537738850202
1.3102942741300916	0.4369553982589689	1.346852013190136	2.3019267273374946	0.991632453207403	47.0	137.0	2.321350738261931	0.008868354155388803
0.9671794395490625	0.2262908773767276	1.2772741200883422	2.0628433144757445	1.095663874926682	26.0	112.0	1.8827337121193146	0.008150258608689592
0.5301709248838293	0.31627801231468156	1.4146205669122076	1.6618880647168484	1.131717139833019	28.0	49.0	1.4684659321869546	0.011312444818615628
1.398937237385441	0.5332351112173739	1.9383480572852023	2.728785857782252	1.3298486203968112	55.0	105.0	2.0519522417280958	0.009876163364314608
1.217881744069352	0.6910393118172569	1.7583602095966366	2.307963401157985	1.0900816570886331	53.0	83.0	2.117239003289024	0.01303836308826285
1.3569995419083754	1.1398647462534015	2.2427045222200084	2.4983448433405684	1.141345301432193	73.0	84.0	2.1889474116251875	0.01345520589170355
1.3148762531902796	0.500983910450764	1.3908701189411226	2.1992905939202636	0.884414340729984	49.0	96.0	2.4867197337675435	0.013690040807199362
0.9589595813942726	0.5911035147079775	1.5533473746329394	1.9498323369205803	0.9908727555263077	53.0	81.0	1.9677928634589572	0.012056523033376332
1.161997994126912	0.5247181699262928	1.7448849829734754	2.4064947094168527	1.2444967152899407	42.0	83.0	1.933709169217206	0.011462299145866084
1.3820927025443763	0.6275751259872643	1.6816565626046638	2.3852187594458436	1.0031260569014673	71.0	118.0	2.377785666153953	0.010589988781898586
0.8196835298086089	0.5098849779447177	1.8499726871592495	2.1549448183844007	1.3352612885757917	52.0	74.0	1.6138750047063035	0.009331470886602349
1.1836350668764037	0.8382418876605704	1.9468616794259463	2.2560830859780827	1.072448019101679	74.0	92.0	2.103675931881397	0.011662092138498835
1.2864809103969823	0.6214515099408433	1.5059595699664874	2.2261082612324157	0.9396273508354335	54.0	96.0	2.369139488386707	0.012962116072670726
0.7700662491704735	0.6558166881380558	1.9829028115765786	2.1065754107934085	1.336509161622935	51.0	58.0	1.5761773067349387	0.011317755776243001
1.0319170530062831	0.5434690105094517	1.8725566765845998	2.3575875003542395	1.3256704473479564	48.0	77.0	1.7784114483887488	0.010786871957756938
1.046153571707422	0.16051255211350535	1.4374239555769521	2.303185937156802	1.25703236544938	19.0	83.0	1.8322407604305635	0.010525410712829504
1.1037695435971122	1.1768163557930311	2.436410225812369	2.276937469102441	1.173167925505329	89.0	84.0	1.9408453125938265	0.011389108789598267
0.8214899873213575	1.2572335758322317	2.5980327802985084	2.291820557178396	1.4703305698570384	72.0	51.0	1.5587110845428669	0.012555951795182606
1.2179687138427284	1.0328413064351534	2.144555451751032	2.3744636961572323	1.1564949823145039	69.0	80.0	2.0531552081663134	0.012973033650364042
1.429710973947062	0.7030949887227933	1.892732643693432	2.636559423882026	1.206848449934964	63.0	118.0	2.1846648798563795	0.009554338916929096
1.065868169028342	0.764046992809861	1.9007593557904885	2.178939130007451	1.1130709609791092	69.0	86.0	1.9575922887169337	0.011268375854934261
1.198564988897734	0.34116611980695866	1.42557037817524	2.3313047075266176	1.1327397186288835	31.0	104.0	2.0581115583627	0.010012703697427619
1.1689239383421532	0.42223648416769866	1.5631166835567398	2.3174521472041425	1.1485282088619893	37.0	88.0	2.017758144138552	0.011508559751248898
1.3362607225479664	0.5267441168072173	1.652809644191836	2.4735821601163743	1.137321437568408	58.0	123.0	2.174919137552608	0.009113510270331643
1.891545227230969	0.7157826699178935	2.0431913104525874	3.165158949547691	1.273613722316722	57.0	111.0	2.485179685242571	0.011831983480445517
0.5780156612054972	0.39362004104396453	1.3428729985045167	1.5603604523250523	0.9823447911195551	39.0	55.0	1.588404057751196	0.012137780936388478
1.1377781473521116	0.9306829697857616	1.7040746283091914	2.034923496177246	0.8971453488251344	60.0	79.0	2.268220527300398	0.014956467251196122
1.1615552518447774	0.38617066856879756	1.282200526375248	2.067886712230127	0.9063314603853495	51.0	123.0	2.281600940290557	0.009675174645985827
0.9881493118967275	0.5400800424014738	1.8064417507259565	2.2737433726658742	1.2855940607691467	37.0	61.0	1.7686324494261714	0.013485807601564193
0.8525576877123694	0.34295348641010015	1.105274642066999	1.6256597061561744	0.773102018443805	40.0	78.0	2.1027751414082485	0.013747366472664843
1.0580505233611206	0.7454826473094025	1.8883374169573108	2.1923514156848	1.1343008923236793	58.0	74.0	1.9327776523155549	0.01284696863180165
0.9357700824452289	0.462095856288931	1.6494802811766733	2.1188741707856935	1.1831040883404647	46.0	80.0	1.7909448472600833	0.01050901137170248
0.9129599605210607	0.665293321494834	1.5360513674130636	1.863003766237059	0.9500438057159984	62.0	89.0	1.9609661733787216	0.010916456733578793
1.2220700007264729	0.7377457272057772	2.34104797549347	2.8304090137978593	1.6083390130713864	43.0	65.0	1.759833586572479	0.01254521555612288
1.4002757515016622	0.30621414266783553	1.5347643092561147	2.5740393572984432	1.173763605796781	33.0	89.0	2.1929793568195692	0.012729126197180128
1.3703561367933554	0.47281211813863266	1.4939724820377285	2.3796257072260056	1.0092695704326502	41.0	87.0	2.3577701903822543	0.014223254104101647
1.2209662171874085	0.6126753444491968	1.5147417417417035	2.177751412476268	0.9567851952888595	54.0	98.0	2.2761131999108652	0.012107880716651774
0.748767054366327	0.25590686200174106	1.1824057085417132	1.6627278630755937	0.9139608087092668	34.0	75.0	1.8192551006905502	0.011511304741758894
1.3605102505114504	0.4936874677551788	1.611319433209463	2.4831429897329347	1.1226327392214843	35.0	74.0	2.2118925477399918	0.015476774352907027
1.011296913191399	0.7607448835782673	2.170784648441234	2.3799898409381255	1.3686929277467266	65.0	77.0	1.7388778685780841	0.010365670226092626
1.2804367172922961	0.6927855852277243	1.8440191555327277	2.408679189667878	1.128242472375582	54.0	82.0	2.13489497926475	0.013343476852117375
1.5724939214606806	0.006757424574868054	0.8823071732474348	2.445123138951241	0.8726292174905603	2.0	185.0	2.802018417378617	0.00803495372154534
1.927514986470722	0.13901280929499116	1.3207265220059565	3.0953700869177037	1.1678551004469817	13.0	100.0	2.6504744344850573	0.014062506249647676
1.2535183858742986	0.9095914026001347	1.7108698219001184	2.107793327152709	0.8542749412784103	78.0	102.0	2.4673477182866046	0.012774127902337232
1.2439021259410616	0.6836282039169277	1.8607041692702364	2.444029449807381	1.2001273238663195	59.0	89.0	2.0364751315999685	0.011528923561682749
1.057029657779636	0.6214864493335808	1.9133377627561658	2.336068291898423	1.2790386341187867	47.0	70.0	1.8264251208548465	0.012414608682860529
0.8517191675960236	0.20292640731029388	1.4123497351483634	2.096101591638644	1.2443824240426202	16.0	68.0	1.6844512998094645	0.011062922329904936
1.0223429373892183	0.6790526866067716	2.0081395579409467	2.3038594852289065	1.2815165478396882	49.0	66.0	1.797760231120409	0.012821221517617528
1.112527608379759	0.7753234427187456	1.4831929074842418	1.9551977017244233	0.8426700933446641	66.0	97.0	2.3202410019845328	0.012518295515146712
0.8209786537523233	0.35334686205177357	1.353899484402626	1.8004920833068887	0.9795134295545654	36.0	66.0	1.8381494617441478	0.013306879975028238
0.6897383376952254	0.3206804105736525	1.2895606210868997	1.6400793505013922	0.9503410128061668	39.0	69.0	1.725779828925373	0.01140939739850527
1.0967917017360016	0.5493409168326753	1.8065068573652945	2.344838421371744	1.2480467196357423	46.0	77.0	1.8788066059386892	0.011815799626947976
0.7947826746640869	0.4618206240799798	1.5313049645566421	1.8567364420414507	1.0619537673773638	44.0	66.0	1.748415514007647	0.012212849766477425
1.433197837078298	0.1809801100374191	1.3609308005147316	2.601547949630971	1.1683501125526727	22.0	112.0	2.226685239022207	0.010311586029211214
0.7838056487425703	0.2432094518524145	1.0049869046546795	1.5356874708425436	0.7518818220999733	34.0	79.0	2.0424585695574273	0.013041858407402357
0.9411245812805094	0.5937198664902745	1.9872619860353489	2.3213896703534767	1.3802650890729673	53.0	74.0	1.681843356563195	0.010135720840491694
0.8224677821509592	0.5386647628426036	1.7418618130065326	2.0376678924063363	1.215200110255377	48.0	70.0	1.6768167441806072	0.0106532146910373
1.2009084974820725	0.5081957908264241	1.5131769702368787	2.2227716047209536	1.021863107238881	54.0	105.0	2.1752146534842423	0.010677693098315804
0.9657970131594407	0.5127718424615042	1.5083954966377133	1.9829517456536614	1.0171547324942207	49.0	81.0	1.9495084497037702	0.011890251947959183
1.245395462838674	0.8542246653939874	1.8136555087901158	2.2163290889537492	0.9709336261150752	73.0	96.0	2.2826782689788825	0.012403411811596265
1.2681812864482434	0.467241647394975	1.4906220372696544	2.312761940382651	1.0445806539344076	49.0	107.0	2.214057795988893	0.010716755914658375
1.0719947799487335	0.649403215699571	1.6627440864662248	2.132814154992506	1.0608193750437727	50.0	78.0	2.0105346915486906	0.012917682434522952
1.2994659989174246	0.7535688568816818	1.9325837910278472	2.4847444826307044	1.1852784837132797	65.0	96.0	2.0963381321547443	0.011123660806344854
1.0329609613487247	0.2805399238837405	0.979918107202249	1.6884465921174816	0.6554856307687569	58.0	125.0	2.5758712515745965	0.010920483886263824
0.7748734656083068	0.3240260799827801	1.321296081736701	1.7550384299136939	0.980164964305387	39.0	70.0	1.790554135096469	0.01200580196204174
1.3216611771894184	0.25187288565399313	1.3344778596563023	2.405570383351968	1.0839092061625495	37.0	147.0	2.219346758635441	0.007824048278595654
1.3067809302808193	0.2868991601885186	1.2529198923522262	2.287366836062959	0.9805859057821396	37.0	130.0	2.3326531847696694	0.00939978327401465
0.7363051451648515	0.27991989902733105	1.2668755263941882	1.733814858227447	0.9975097130625956	32.0	70.0	1.7381433338671128	0.011393529387748971
0.5133590569525053	0.19835816119798766	1.3670367477831755	1.7157442774849239	1.2023852205324186	21.0	59.0	1.426950571402723	0.008693819689901646
1.1011371726877088	0.6103258088753667	1.8821190134665233	2.393124284786548	1.291987112098839	54.0	84.0	1.8522818551176616	0.010586948155436276
1.204246960030592	0.394079241102697	1.6218733348278713	2.45642356564432	1.2521766056137278	43.0	116.0	1.961722934793496	0.008380355999813856
1.02404116794109	0.6146251995165666	2.0199332957151697	2.3746162974459755	1.3505751295048856	44.0	62.0	1.7582259924455284	0.01313097610125276
1.8023746751560872	0.5700974833949657	1.7781231560195652	2.969201052168596	1.166826377012509	56.0	123.0	2.544681120228708	0.010955161627925857
1.2062554689462368	0.18565941458771418	1.328734979188254	2.341402098057797	1.1351466291115602	20.0	90.0	2.0626428674596258	0.011605489444923784
1.225784362207722	0.6511770062975305	1.691121681432831	2.2001941743796247	0.9744098121719027	50.0	76.0	2.25797620969715	0.01546092481297894
0.9179167235650364	1.3202839454258737	2.3242028655479494	1.916148769890752	0.9982320463257156	85.0	65.0	1.919542431986327	0.014473268487502636
1.5753271250491487	0.4958259781642178	1.780809081604506	2.886038598190968	1.3107114731418192	47.0	123.0	2.201887034125853	0.009258052476447216
1.2993401183269735	0.6289977044708802	1.4501306900888231	2.140384790183382	0.8410446718564083	72.0	124.0	2.5449121334530136	0.010867869727061403
0.8421262234199738	0.7166761840015194	1.7266389444036785	1.8905870971133574	1.0484608736933836	66.0	77.0	1.8032023364433614	0.011046250518847077
1.0897759324473488	0.6545973222653154	2.035115551327254	2.4461398155998157	1.356363883152467	47.0	69.0	1.8034539595042054	0.01232989265127793
1.2532990587644512	0.3066214606725639	1.5152825444938822	2.4328442349559896	1.1795451761915383	32.0	87.0	2.0625273911178597	0.012004750333371282
1.2104106725488746	0.5023172747165943	1.731367110750204	2.486863318734861	1.2764526461859866	33.0	75.0	1.9482613210647146	0.012829162662105733
1.3146737908954316	0.6118417078252916	1.4938152979851607	2.258903549912066	0.9442297590166346	58.0	110.0	2.392324038022901	0.011440116494971944
0.6749329881927584	1.095398391896557	1.9499330844610343	1.749228664552316	1.0742956763595577	63.0	43.0	1.6282562641226381	0.01635645992856605
0.816912810635679	0.2687406120264544	1.1097199168567031	1.66637655415498	0.849463743519301	33.0	81.0	1.96168060952341	0.012001113193701009
1.1193370342607545	0.4423508340535576	1.6368819287496006	2.2927091640006982	1.1733721297399438	42.0	80.0	1.9539488844931359	0.012079909084337726
1.2060802890269644	0.26710857637745367	1.449917693451323	2.390999513670116	1.1849192246431517	30.0	104.0	2.017858655631303	0.009738703095539545
0.8893086840887309	0.39730750642383994	1.1590159716237376	1.6829631743955549	0.793654490306824	41.0	84.0	2.1205237227914218	0.012909769318918402
0.9890274134205466	0.4628402146633257	1.490006094070495	2.049098132896177	1.0600707194756305	35.0	68.0	1.932982484328757	0.01398277300976822
0.901690283736591	0.7554674223990512	2.1441601469456866	2.2327765503733508	1.3310862666367598	68.0	73.0	1.677409350796535	0.01022239456945259
1.3080771156669642	0.20852172242698908	1.2927671496947357	2.3542392190867543	1.04616210341979	34.0	123.0	2.2503579621083603	0.009513451282123135
1.3240808521298943	0.5615894833187989	1.9544852144851845	2.725099754811966	1.4010189026820716	44.0	87.0	1.9450842166334164	0.011032558864021371
1.025789555668514	0.48116683175902564	1.526678445496399	2.08584735729611	1.0600578016275959	42.0	80.0	1.9676732288499108	0.012206133155689929
1.069399415704011	0.21832870045313824	1.4656846896380697	2.3223464281449746	1.2529470124409636	24.0	94.0	1.8535072952691198	0.009470827590535991
0.7946209951124625	0.5161142687464042	1.7516955897131832	2.0331179299095217	1.2384969347970591	39.0	57.0	1.641601099515575	0.012545677234205608
0.9722939426254349	0.40862157102450825	1.5724455099463563	2.12175617856273	1.149462235937295	41.0	77.0	1.845868539415396	0.011484413111683899
1.083997752018887	0.2203019481952566	1.5488596953536677	2.3749108752154093	1.2909131231965223	24.0	73.0	1.839713945532386	0.012047691248622585
1.0840431882941561	1.0196823080559796	1.9546048663642757	2.143630916021714	1.0595877277275578	73.0	84.0	2.023080165923634	0.012101827247599015
1.4431230624895832	1.0878488234048467	2.10819449340555	2.5340907146960108	1.0909676522064276	58.0	76.0	2.322791798245291	0.015998155855531722
0.9854417704155292	0.46506976921165366	1.6272822619126934	2.1302133374461105	1.1447715670305814	44.0	75.0	1.8608195720406149	0.011945842349650251
1.0319050236108	0.57026577249028	1.4675072644101221	2.004814008256875	0.9729089846460747	51.0	92.0	2.060638805783243	0.011337952691706813
1.1493783092390648	0.5074818889617707	1.6784472919825333	2.335551374931658	1.186173065692593	40.0	83.0	1.9689802799290135	0.011776489905825983
1.216401836602841	0.5691108323005614	1.8070822313296098	2.458513716785101	1.24211188018226	39.0	73.0	1.9793013463685363	0.013493031202457229
1.1970723123307003	0.2836796989724897	1.410704799503915	2.332448095232495	1.1353757829017948	36.0	117.0	2.0543401844200178	0.008877564971662876
1.1012974569482312	0.40201226623872066	1.8138489514064204	2.4728987098009196	1.3716012528526884	34.0	73.0	1.802928296148554	0.011648520833077469
1.0017671492858753	0.2677746338397611	1.430107767636455	2.150484939247319	1.1487177899614438	23.0	62.0	1.872074201374995	0.014590929332152083
0.9880458006917359	0.26736889547943377	1.5667062051235747	2.301661246537444	1.313615445845708	25.0	84.0	1.7521575692615505	0.009632530005597103
0.9761406713871106	1.3315438517982208	2.621881173184308	2.4272360131133124	1.4510953417262018	82.0	64.0	1.6726923058176921	0.011596438811428092
0.8211281165345099	0.72711486836156	1.6981484423512374	1.7967174645408532	0.9755893480063433	79.0	86.0	1.841673925830083	0.010244391282996654
1.4415654202874337	1.245415013058475	2.8428972331353735	3.0355409991579014	1.5939755788704677	77.0	85.0	1.9043836300860797	0.010933225091537756
0.9354085558337599	0.4979286552744935	1.8358325331011365	2.309022923387517	1.3736143675537569	38.0	70.0	1.6809833807283268	0.010704363732044527
0.7811413883237441	0.24779767552798382	1.2584055160921244	1.7704956165144878	0.9893542281907437	36.0	82.0	1.7895467225649164	0.010238953792659525
0.6082606872202485	0.24437742078752045	1.2680381704663433	1.6362657288617297	1.0280050416414812	28.0	59.0	1.5916903736668448	0.011365418990116874
1.4039909894104203	0.7845566203364855	1.9775862138882008	2.562742363928752	1.1587513745183318	67.0	94.0	2.211641272049433	0.012182099995582762
1.175256429792948	0.6651531269510247	1.5903700544674833	2.1504603638333384	0.9752039340403903	62.0	96.0	2.2051391393836113	0.011884059265715572
1.4102575356549638	1.1435727591788256	2.361978895149222	2.5854961395495586	1.1752386038945948	73.0	82.0	2.1999755036820146	0.013871798289005675
0.9693213989577807	0.589436587639363	1.6284529073400302	2.0236208353342113	1.0542994363764306	58.0	87.0	1.9193985745541942	0.010812118699620208
0.8616720419595927	0.34505709979026866	1.782293584414604	2.2452261262797886	1.3835540843201959	33.0	60.0	1.6227960668288381	0.011641361850013212
1.4946053781165618	0.20163890678906904	1.209824398481216	2.4911455612562734	0.9965401831397116	27.0	125.0	2.4997943920411116	0.010574475505399044
1.3400099220699737	0.31138763504888156	1.4379275867753623	2.4650454788396496	1.125035556769676	29.0	92.0	2.1910822853613228	0.0123004746225494
0.7203130496943466	0.5459796872324814	1.449141142798317	1.7012738671018717	0.980960817407525	48.0	68.0	1.7342933957321394	0.011681588005160826
1.2202269665020202	0.45944131482371775	1.6331919770812617	2.33661315699319	1.1163861904911696	55.0	104.0	2.093015102565148	0.010245987708491147
0.8168028789500711	0.28667179433481627	1.2671553779020086	1.801947583151494	0.9851447042014229	31.0	73.0	1.8291196973059782	0.011933554628944397
1.1459361062217939	0.3205877314546277	1.1263823674003517	2.016588735965713	0.8706526297439191	35.0	119.0	2.316180606447881	0.010182754229160002
0.5358437040826614	1.2259262331187044	2.44289347994462	1.879336898358191	1.3434931942755297	86.0	44.0	1.3988436311890748	0.011005334109181456
0.9600916039848002	0.5916544444174778	1.646000210418982	2.025069937879176	1.0649783338943757	67.0	95.0	1.901512803996651	0.009759448984313713
0.44006661022025884	0.44186412747129467	1.4275761297676683	1.4467658257190135	1.0066992154987546	51.0	52.0	1.4371381277000739	0.010061514043290715
1.0599865558386803	0.5148484980609431	1.5825441125266262	2.173034496013622	1.1130479401749418	49.0	96.0	1.952327853616151	0.01005411817116821
1.0861547722695648	0.5861767842835733	1.694155180246131	2.1307153055165613	1.0445605332469965	60.0	87.0	2.0398198454744154	0.011821169432971082
1.1279752501889913	0.5501249473058625	1.5869976712670524	2.18887444963985	1.0608991994508588	51.0	95.0	2.0632256587363362	0.010998964421367772
0.7662680854054722	0.3949637748193242	1.582960521155453	1.974879284330733	1.2086111989252608	33.0	60.0	1.634007103431496	0.011806904254134167
0.8883069259691598	0.2027339774334147	1.140573130812891	1.8238557101116912	0.9355487841425314	23.0	77.0	1.949503586585631	0.012507880635404324
1.1328177880287313	0.6409896877066459	2.264240429508709	2.6902369831165003	1.557419195087769	61.0	86.0	1.7273685797643523	0.009169487823850513
1.0625885261264072	0.5579239086764884	1.6158549366663595	2.181105612433048	1.1185170863066407	39.0	67.0	1.9499975808461627	0.014380184092212924
1.0760610474324956	0.47293693306685636	1.533631027917926	2.118766762488712	1.0427057150562165	54.0	100.0	2.0319892102773034	0.01022892741519156
1.0345088463198726	0.4611566931234907	1.733397174598056	2.3051235708660163	1.2706147245461437	38.0	76.0	1.8141798031573995	0.011306808530219618
0.9910158956663562	0.5768388298830869	1.9560367801899026	2.3607279520145577	1.3697120563482015	50.0	77.0	1.7235213350669558	0.010199469579217508
1.3670718780218234	0.29570563239985226	1.2286106354549065	2.256825968359634	0.8897540903378105	46.0	123.0	2.5364603465917095	0.010917208182669875
1.8554219668813343	0.7170933762425498	1.946812888511168	3.1054977211599635	1.2500757542786292	68.0	143.0	2.4842476230186765	0.009180482409983155
1.0494600957928153	0.5530669076337961	1.5000849119261135	1.9834539837561211	0.9339938879633057	55.0	86.0	2.12362629918414	0.012634068757598685
1.6890417850739743	0.8125880778253887	1.8970616174930348	2.856383579633444	1.1673417945594697	65.0	123.0	2.446912800471933	0.010495631623258197
1.0403728927598477	0.2700291418841022	1.233389881937665	1.9968820382000778	0.9565091454402301	36.0	102.0	2.0876768901995386	0.010410769051374873
1.3166550588510757	0.3355187519131837	1.3805353882836167	2.36616468676701	1.0495096279159342	33.0	96.0	2.2545430969181544	0.012217032168789495
0.7634865420401208	0.19895928754190995	1.1603845446872076	1.7059168603111743	0.9424303182710535	27.0	72.0	1.8101251914738736	0.011890131668208742
1.1954032470875138	0.44723969478257897	1.306881338038363	2.015808275201135	0.8204050281136213	66.0	124.0	2.457089128081206	0.01045927573187106
1.3084048557609704	1.0638458944339806	2.220061259965687	2.47288407619148	1.1644792204305094	64.0	75.0	2.1235965681528017	0.014486796201370063
0.8111414971201605	0.36317851047928096	1.2386704576039518	1.7010855014227915	0.889944004302631	41.0	79.0	1.9114522859848684	0.01183125554189128
1.0452895429864606	0.6788228744833178	2.145396769561917	2.395011734053884	1.3497221910674235	63.0	78.0	1.7744479196565603	0.010607310662555344
1.0267429694771883	0.6835613264078881	1.8141478188900162	2.135567612481706	1.1088246430045174	55.0	75.0	1.9259741618792696	0.01260784464900406
0.7031767297535036	0.6878450946953119	1.7859671199403437	1.7904621042849176	1.087285374531414	58.0	58.0	1.6467269276536998	0.012406919596844458
0.9860785424940044	0.5386762596341577	1.7056113996194886	2.171055403917747	1.1849768614237428	55.0	88.0	1.8321500398828352	0.009926564256798253
1.3437547983328373	0.5538476025223867	2.0106744496282394	2.6663284447090274	1.3225736463761901	57.0	99.0	2.0160151020812207	0.010217236830172467
1.3654083981174285	0.7684998224109936	2.2914068398814393	2.9073091032640996	1.541900705146671	40.0	68.0	1.8855358802028346	0.013455508883019166
0.7416714092433945	0.37736386522011256	1.5768582051067983	1.9578098912582063	1.2161384820148118	30.0	53.0	1.6098576931918527	0.012961003091842185
0.592066022597189	0.026251195256243642	0.8067472357338928	1.3730725859312012	0.7810065633340122	4.0	68.0	1.758080726069367	0.011970607594962802
1.5719683768368506	0.4320280402553801	1.3940330569159172	2.4848970554333674	0.9129286785965168	55.0	121.0	2.7218961499309047	0.01193894234643301
1.1008393513253403	0.400280274370983	1.4702504076845304	2.1842311626709523	1.083391811345612	44.0	97.0	2.016104552200794	0.010428561410404933
1.0778621304979366	0.43217827977288126	1.797924897703797	2.468759453316922	1.3908973228189856	40.0	90.0	1.7749401144244001	0.009197448329360446
1.2423252887116472	0.3654416899917805	1.164252446854707	2.069204594878471	0.8268793061668238	42.0	116.0	2.5024263873172883	0.011407996815637877
1.246631567622576	0.8902142768565418	2.1072706665911194	2.435341371365153	1.188709803742577	77.0	96.0	2.048726580446831	0.01077841101643643
1.182054465974832	0.5537824103958024	1.6921839677401147	2.3747677308430366	1.1927132648682046	57.0	118.0	1.991063402070446	0.008419823406701141
0.7653130578972884	0.38417473175596495	1.5594792509797326	1.896803638499601	1.1314905806023126	48.0	76.0	1.6763759867005685	0.009807181063153349
1.192439401348266	0.2603930888946355	1.0732424020218094	2.0313809589750473	0.8389415576267814	32.0	116.0	2.421361703336604	0.010998436253568715
0.6501827950720708	0.39122406357191974	1.243371790181736	1.5037985422769482	0.8536157472048774	49.0	74.0	1.7616808818265857	0.011039900164439611
1.3511452399917319	0.40309879445402186	1.5667502977833554	2.4748147528876703	1.1236695128959384	50.0	115.0	2.202440063101418	0.009905241377191688
1.1940070702643721	0.7667925396102384	2.053127681977513	2.4354660920153215	1.2414590217509494	61.0	84.0	1.9617772712145978	0.011573348281519739
1.7233606435956028	0.5378691069318489	1.833435594585776	3.034339009217265	1.310978365621662	48.0	121.0	2.314560704270959	0.010006102486512049
1.2726071064105184	0.5252336023412938	1.6825989207224705	2.4685862969647685	1.19597919055425	43.0	93.0	2.064071278548548	0.01124185798055749
1.505520963870338	0.00802091472210753	1.0511533711390566	2.5425244453406775	1.0370034814703395	2.0	130.0	2.451799334111878	0.009952622364945598
1.3047385059696692	1.924342580838155	3.3169850271460635	2.4992703246965653	1.194531818726896	92.0	70.0	2.0922593149173947	0.015215166721361258
1.0592783542217392	0.5106133861639414	1.4896387248247014	2.0241500680458797	0.9648717138241405	51.0	83.0	2.0978437226887197	0.012878400113513233
0.8263951533158584	0.4226795350893291	1.5245021762337942	1.9234344247693969	1.0970392714535384	41.0	68.0	1.7532958708223034	0.011912786370499657
1.25809768359808	0.23508176262861746	1.6391766563054355	2.654844373597041	1.3967466899989611	19.0	77.0	1.9007343225556637	0.012033206384804842
1.1045073682239357	1.1251636610919773	2.1858870515052726	2.314188374867351	1.2096810066434154	75.0	73.0	1.913056716736165	0.012820269125440134
1.1917372371775514	0.3333081782117535	1.5295109279423782	2.370286607143031	1.1785493699654797	44.0	116.0	2.011189914948118	0.00869008034946479
1.0509857444804669	0.1900599912689136	1.2135293362152926	2.0630541878938944	1.0120684434134275	28.0	105.0	2.038453230431513	0.009785474823888583
0.5063801179028595	0.2814114499242364	1.4286594399420132	1.648496597026298	1.1421164791234384	32.0	49.0	1.4433699426975264	0.0108049207538984
1.2413665127808398	0.5400514054121233	1.7525713989339604	2.4542675233129723	1.2129010105321325	33.0	60.0	2.023468940994796	0.016947178411577894
1.1975902822479345	1.3859232794757026	2.476424913758611	2.2607770116856853	1.0631867294377508	74.0	66.0	2.126415754720021	0.01649126816311501
1.1433655990552252	0.375968250084846	1.5145898156545856	2.297202120076757	1.1538365210215318	38.0	94.0	1.990925125201414	0.010568499629158257
0.8131880556169664	0.42168024991375275	1.1215890162432585	1.588586468252871	0.7753984126359046	48.0	102.0	2.048735775525512	0.010144450320156984
1.4467440633230164	0.31502931204458906	1.1811177449852057	2.287592283243168	0.8408482199201517	45.0	128.0	2.7205769472407297	0.011280567447932424
0.8316553514104066	0.37918452173711303	1.3677290943695841	1.868512843406769	1.0368574919963625	35.0	74.0	1.8020922429842694	0.01148206567166288
0.751746769215603	0.840296471595154	2.0518098716007707	1.9304331978355829	1.1786864286199799	61.0	55.0	1.6377835113413133	0.012940812154243253
1.088934528853436	0.5882536184478722	1.9629205751870507	2.441247851998737	1.352313323145301	51.0	83.0	1.8052383350928756	0.010267341208461182
0.9175540763798999	0.8060868550532732	2.300601629612815	2.379413377005495	1.4618593006255949	52.0	55.0	1.6276623721497943	0.012778208559466991
1.721051567974448	0.5909017313521214	2.0765783653281358	3.173475937295613	1.452424369321165	44.0	97.0	2.1849509030055962	0.011624751154379087
1.3246824039375047	0.393879291733096	1.6246284632204113	2.4930674303550777	1.168385026417573	43.0	91.0	2.1337721504349987	0.01201545197556526
1.0191867417613951	0.22302882836281124	1.239572795328673	2.0430630712309177	1.0238763294695226	26.0	93.0	1.995419771340395	0.010717121230442552
1.1286051996071889	0.09124328203911425	1.2616270626710873	2.2850282812245455	1.1564230816173566	10.0	74.0	1.9759448920967038	0.013277604210742373
0.9826107752852731	0.6084010960012745	1.4686528981455182	1.878637999640415	0.8960272243551419	68.0	99.0	2.0966304913251315	0.010788612366500309
0.7979688171350852	0.6414350883404762	1.9505261735605022	2.115000332285658	1.3170315151505727	55.0	66.0	1.6058843755487928	0.010354060937186755
0.8298155719636191	1.0435425035390131	2.391400447446223	2.3564167265728493	1.5266011546092302	55.0	45.0	1.5435706434900673	0.0139171446945051
1.3621384456556265	0.5492499255501773	1.755492228110529	2.540542112849777	1.1784036671941505	51.0	97.0	2.1559183695506987	0.01142579952321515
0.7448539279377344	0.6847871614611887	2.060031309541355	2.1521950966224073	1.4073411686846728	41.0	45.0	1.5292632266516362	0.013618594534443734
0.9221094171575552	0.9881351309447339	2.372621892362675	2.341857564825429	1.419748147667874	58.0	54.0	1.649488022697718	0.013370709300162785
1.0096873923328875	1.1520469900660113	2.646666647109773	2.4328805934373805	1.423193201104493	74.0	66.0	1.709452090938393	0.011720211975798462
1.327819746038779	0.3494463542631755	1.1891151341220834	2.2454334947117474	0.9176137486729682	36.0	130.0	2.4470355832822266	0.009931039079625593
0.9979573596304817	0.07632827901471695	0.88330672102302	1.8214862828153142	0.8235289231848325	10.0	114.0	2.2118060842005187	0.010045832505555682
1.1773016055177803	1.2164155704854311	2.265869759622584	2.42926692019825	1.25196531468047	86.0	83.0	1.9403627973657198	0.011522005109338804
1.1080596892616175	0.6390324825920257	1.6682930473579538	2.128149999596128	1.0200903103345107	77.0	111.0	2.0862368537725446	0.009557684311783134
1.1881443570181058	0.4736882856748419	1.511919263310534	2.2286802771827694	1.0405359201646636	62.0	124.0	2.1418580886953746	0.008861797546877763
1.0807519569637807	1.3886026810666625	2.680091701687669	2.354145274590006	1.2733933176262255	67.0	55.0	1.848718099902115	0.016118640972212647
0.6409969651162135	0.6409969651162131	1.8940823579758186	1.9750394541895535	1.33404248907334	47.0	46.0	1.4804921660039976	0.012306018620487543
0.8703001388733838	1.2231551290448794	2.3713229350054297	2.020934936725262	1.150634797851878	64.0	49.0	1.7563652172680233	0.016583527938656875
0.7004164886528992	0.34174780790780934	1.7144673641921613	2.0930603977969464	1.3926439091440472	30.0	61.0	1.5029401155988196	0.009635861089399306
1.1571672589783732	0.05892251620033684	1.1159309332875307	2.196119797229074	1.0389525382507006	9.0	90.0	2.1137825996620716	0.011998077829651945
1.3111818178637509	0.2599173798829193	1.5923217751564713	2.5919445553874563	1.2807627375237054	33.0	99.0	2.0237507537101362	0.010273046644789549
0.9397011689082091	0.8648404727039143	2.2101659539423313	2.2449159980655566	1.3052148291573475	66.0	67.0	1.719959004384653	0.011677226542860734
1.2142534878555153	0.8656026223793305	2.110899139602371	2.3692124032517383	1.154958915396223	61.0	72.0	2.0513391183607173	0.014396750160175416
0.8630615642108724	0.844690869082515	1.6187003110830522	1.7129695490207093	0.8499079848098369	65.0	65.0	2.0154764746727007	0.01555570682553523
1.1615511391865818	0.29030665863074545	1.5541612766405037	2.3928540702732297	1.231302931086648	30.0	84.0	1.943351233771117	0.011411269900003171
1.2787618151621059	0.216702127274931	1.6330046845102266	2.636937299143914	1.3581754839818083	30.0	104.0	1.9415291545486577	0.009203782416578342
1.0259852379023666	0.15706281432761615	1.1845450881078343	2.0440297859892365	1.0180445480868698	22.0	102.0	2.0077999433624187	0.009858975752061249
0.8064875662184261	0.1719813697775201	1.1906374103748951	1.8301318783736744	1.0236443121552483	19.0	70.0	1.787859177882202	0.011974758657142981
1.1110215587280263	0.05249473433041296	1.0816067623258798	2.139393206668938	1.0283716479409117	7.0	100.0	2.0803696902307673	0.010568399239771948
0.9824003923171726	0.2991767632667698	1.2780739068204459	1.9308091595871861	0.9484087672700136	44.0	104.0	2.035840690449334	0.009861775686428176
1.0450544909375277	0.3449101834651833	1.7379827494297564	2.3796562980865335	1.3346018071490058	33.0	70.0	1.7830459132750518	0.011919197895875836
1.182303999430321	0.6626578100689096	1.7523097602155575	2.2859203440300386	1.1036163445997176	56.0	86.0	2.071299827350005	0.012215539574982165
1.074597403901584	0.8006387651939062	1.9632360806553375	2.187821774227763	1.1132243703261788	70.0	83.0	1.9653017240241721	0.011743985783549455
1.274061222761039	0.4972910024920343	1.8198071250361512	2.6185331404130765	1.3444719176520374	37.0	81.0	1.947629478930313	0.011873077064550234
1.0390688892335058	0.35876559990775647	1.1812650627456927	1.8840436752091678	0.8449747859756619	39.0	92.0	2.2297040177757856	0.012574480567347224
1.3014377014012097	0.5544301627543886	1.945335344798359	2.7617564951420257	1.460318793740816	39.0	92.0	1.8912010904601115	0.009992421440014922
1.3197460264198615	0.27746758133410765	1.424285664144551	2.4603053365684313	1.1405593101485698	26.0	87.0	2.1571042511133864	0.012748228764070956
0.7179654231012107	0.6950857037567988	1.6920223850317162	1.7710450624495186	1.053079639348308	71.0	77.0	1.681776948555875	0.009740082803840247
1.3899288102207443	0.4328365954461426	1.7760990861197816	2.6151407661046218	1.2252119558838774	58.0	106.0	2.1344394768152903	0.010319408063849863
0.821056124491711	1.099467534048377	2.656633698949493	1.923466688272454	1.102410563780743	88.0	70.0	1.7447825260997858	0.011472103237897777
0.8946738587007483	1.0294721878571618	2.674750236243982	2.248031109022184	1.3533572503214355	69.0	61.0	1.661077375163324	0.01200195536874141
1.255753966403361	1.4209847667796582	2.5625516800169126	2.522096045752552	1.2663420793491909	84.0	76.0	1.9916388208853715	0.013078368969763965
1.0718031158864991	0.8176389224283109	2.076915837664484	2.306548698525917	1.2347455826394178	58.0	69.0	1.8680355945031126	0.013065535437053862
0.8766964910462602	0.5206735022865019	1.6458143474819389	2.027900482933044	1.1512039918867838	44.0	69.0	1.761547473101952	0.011838309499923774
0.7320462515314914	0.32756691866344934	1.7823357965732476	2.1514089948592554	1.419362743327764	32.0	57.0	1.515756986698956	0.010526990743558985
0.9122526414680008	0.4083582288953984	2.082868399279044	2.5847615771819	1.6725089357138991	28.0	53.0	1.5454396218688136	0.01184938285378893
1.41994684344051	0.38879263984307566	1.6597782600052862	2.655121095319521	1.235174251879011	40.0	103.0	2.1495923277872846	0.010719059002728957
0.853580316452897	0.9444123343813826	1.9207018536285356	1.877400485651092	1.023820169198195	84.0	77.0	1.8337209425375733	0.01136070266080678
1.0963655281462208	0.9273522920290076	2.027761673929268	2.238221173387932	1.141855645241711	73.0	86.0	1.960161236418058	0.011290375936881565
1.5057286635709777	0.3472915950605111	1.3520289949056945	2.5048000695434194	0.9990714059724418	46.0	137.0	2.5071281737919255	0.009679093095158211
1.6082672651005234	0.6103737298878396	1.617214695243352	2.633275078412831	1.0250078133123077	46.0	94.0	2.5690292739363767	0.014481099252733122
0.8997714986887266	0.23724392950384643	1.0589434374492415	1.7241145586538555	0.8243430599651289	31.0	85.0	2.0915012722091557	0.012523986771039792
0.6987851848545084	0.6648228611979148	1.7303973229675025	1.7992886178807326	1.1005034330262242	68.0	73.0	1.6349686551480815	0.009715931196110712
0.9626095390911265	0.3337643350631724	1.3334486957720975	1.9348817126746625	0.972272173583536	54.0	115.0	1.990061800846572	0.008633158556349574
0.863776864834793	0.672271673933535	1.8475727950914826	2.0074158660112262	1.1436390011764332	66.0	76.0	1.7552880445195091	0.010680365758591319
0.8149384234517909	0.6480295289745972	2.207171042262157	2.367637133392854	1.552698709941063	47.0	56.0	1.524852901747258	0.01086910851199903
0.9322064862948374	0.4617337970990929	1.3736130145060352	1.9207687239221625	0.9885622376273251	47.0	104.0	1.9429922070786876	0.009214231871127182
1.531831189612121	0.37691207149883166	1.4143607914845995	2.5902240011955753	1.0583928115834542	47.0	149.0	2.4473182100701902	0.00866578321190818
1.2484000399509956	0.1768417122450665	1.383529409382846	2.4151276498755165	1.166727609924521	19.0	75.0	2.0700012833601824	0.013995088828899969
0.8424303039194032	0.5574595790391633	1.3568100563944725	1.6819198942759608	0.8394895903565576	56.0	82.0	2.003502977995947	0.01222591041688267
1.4560447827457366	0.475696877735609	1.3436958206885532	2.3150129714613468	0.8589681887156103	56.0	124.0	2.695109087710125	0.011535029588211199
0.874592747702144	0.5338563549252129	1.5410377841748295	1.9024907904237982	1.0278980427216542	54.0	80.0	1.850855543402349	0.011102403741768916
1.5104221295337474	1.5039628030906083	2.7105431774142184	2.807114331255807	1.2966922017220597	60.0	62.0	2.164827032604843	0.017971802576541445
0.8919949513228531	0.435492957213125	1.5369733579633964	2.031920192440923	1.13992524111807	40.0	76.0	1.7825030266440631	0.010972427978028028
0.6454212771903358	0.39459605859493774	1.614238370646277	1.85837560482361	1.2129543276332742	32.0	50.0	1.532106825860201	0.01231033784820429
1.0015726802850364	0.9418790648817214	1.8437310942729226	1.9019742663576404	0.900401586072604	89.0	92.0	2.1123621901353187	0.011726708950876978
1.4707378573942256	0.7123394042832389	1.95142329269727	2.684231332244191	1.2134934748499653	63.0	106.0	2.2119866219932214	0.010805119436198074
1.2163027733486018	0.37035051167504873	1.5682340592740205	2.4385574199226707	1.222254646574069	39.0	105.0	1.995130414728101	0.009490314795059308
1.176620766137014	0.754910924975702	1.7269636713636212	2.207103228425768	1.030482462288754	51.0	78.0	2.141815420636737	0.014087617378574953
0.9396016911128972	0.4076937989464279	1.1831275829032553	1.739800141011809	0.8001984498989118	44.0	86.0	2.1742108363638994	0.013028974969417245
0.7178104747771412	0.27185114566500523	1.219043828135015	1.6543467320267407	0.9365362572495994	32.0	67.0	1.7664524135832096	0.012251565448162827
1.310094379090654	0.5400703792380763	1.7290823409170237	2.511209026225637	1.2011146471349827	50.0	97.0	2.090732164673556	0.010969157277107233
1.2642244366542752	0.4618009778176967	1.2768807607568002	2.0890886574363297	0.8248642207820545	53.0	107.0	2.5326455006809034	0.012529393965883883
0.7036957127020638	0.24032612838562883	1.3387071556339492	1.790270651672798	1.0865749389707342	26.0	59.0	1.6476274092688392	0.012210000535840333
0.8308364125566969	0.8984243668930518	2.502443412923335	2.287013470928878	1.4561770583721811	67.0	62.0	1.5705600206924462	0.010504501261836975
0.7666350457483759	0.7264505648159496	1.758095825336813	1.872195302656432	1.105560256908056	67.0	75.0	1.6934357860262095	0.010132710424266455
0.6944643645791784	0.8036836383059154	1.9603631486074093	1.7926467665753698	1.0981824019961914	66.0	58.0	1.6323761547415387	0.012189198989803564
0.8942088372884627	1.2448131580314485	2.404517563392957	2.246385235894834	1.3521763986063713	73.0	56.0	1.6613107862332788	0.013077178351765032
0.830951214938696	0.3194211641691005	1.7072360184207442	2.237173852792271	1.406222637853575	26.0	62.0	1.5909101393837894	0.010804070146820695
1.3516746357641116	0.44838084076668583	1.718438600115644	2.5754102380845705	1.2237356023204589	43.0	93.0	2.1045479376436003	0.011543122278846487
1.1314051379535002	0.24391174541928762	1.549887211597858	2.428482384403943	1.297077246450443	26.0	90.0	1.872272750948089	0.010053229118883091
1.4519782083796045	0.6475603549082225	1.990438423178965	2.7691281900990097	1.3171499817194052	62.0	109.0	2.1023636097114733	0.00983497439498478
1.0062352138333175	0.6602210814838667	1.6649703625355436	2.0193648355235285	1.013129621690211	63.0	86.0	1.9931949400064015	0.011570730426316435
1.2536861397914052	0.5266828516805298	1.7395017060020581	2.4449729796360704	1.1912868398446652	48.0	89.0	2.05237974420575	0.011655030248891692
1.2068713461660374	0.3792605508573934	1.6972768934273388	2.4837175401207823	1.2768461939547449	36.0	77.0	1.945197120749543	0.01246644624981971
0.9559286974166008	0.29792545099952594	1.476667124066684	2.1650802359424364	1.2091515385258356	29.0	88.0	1.7905780764105406	0.009550288947046315
1.2085016788043372	0.1991321271972082	1.1527082587710318	2.1967042713769844	0.9882025925726473	23.0	125.0	2.222929071313375	0.009219695327460944
1.1156594829685438	0.2543102480623509	1.9647928828605152	2.77555486826032	1.6598953852917764	21.0	60.0	1.672126383900051	0.012361398239825303
1.1936613807433072	0.5130789762019592	1.4431829432177843	2.1369151279184315	0.9432537471751242	60.0	114.0	2.2654721853139828	0.010349226123227919
0.8717456711100606	0.5744030667346149	1.959608844065977	2.313046496134156	1.4413008250240953	41.0	66.0	1.6048325623455375	0.010339739150081035
0.9444762562745723	0.7093705215708479	1.8122242271686375	2.092467383011388	1.1479911267368157	59.0	76.0	1.8227208680255762	0.01139596899444023
1.3950857827905234	0.5565893309940135	1.7004212025744585	2.5031071031082064	1.108021320317683	64.0	128.0	2.259078464654936	0.009185424849850465
0.9495507882822234	0.6716855506172097	1.9617994306126456	2.1815369012164716	1.2319861129342482	58.0	71.0	1.7707479640502257	0.01161068850033414
1.073407187084681	0.7072395284807151	1.5488303738865594	1.94623868511003	0.8728314980253489	56.0	81.0	2.2297988666920303	0.014282883720931564
1.3529193728423026	0.2347823962004867	1.724681936812824	2.7952905533243495	1.442371180482047	20.0	71.0	1.9379828099381124	0.013444447520983414
0.8884265576443333	0.8737295841572763	2.098139407875727	2.12606897884789	1.2376424212035566	78.0	78.0	1.7178378362147404	0.010007613494637378
1.14561613452934	0.5635633905002977	1.759042331553934	2.3666312980921225	1.2210151635627824	38.0	66.0	1.9382489003548191	0.014465967370061126
1.2348442919507834	0.44054960170003965	1.1757552562494542	2.0088404919774137	0.7739962000266304	56.0	131.0	2.5954138946784195	0.010503546761413277
1.0057419122716205	0.2443434731229166	1.164052858625595	1.963315599858041	0.9575736875864205	29.0	106.0	2.050302368694579	0.00977204421811481
1.3326526479261818	0.8387300927269112	2.038505416145409	2.582934171478017	1.2502815235518352	62.0	89.0	2.065882061617886	0.011761324663669888
0.9959684062937861	0.9959684062937859	2.142795545556331	2.2101060869537443	1.2141376806599582	71.0	70.0	1.820309279712344	0.012345479891453907
0.7207488164461499	0.5439919757045015	1.4195543223809275	1.6495341226686295	0.9287853062224797	61.0	80.0	1.7760122943563266	0.0103580196088361
1.1896069897373154	0.8351010028089081	1.9990573776494593	2.3024854290699515	1.112878439332636	52.0	64.0	2.068946030125888	0.01638900018750928
1.3375018091293556	0.5308685099566295	1.267767654381001	2.161699133341034	0.8241973242116784	52.0	121.0	2.6227931950745393	0.011496727742631913
0.8748048546079183	0.1346794019393116	1.341508368384208	2.0597573912184317	1.1849525366105134	15.0	62.0	1.7382615147693983	0.012865244296926459
0.8297684222973197	0.014538804777369352	0.9486637505166333	1.7579357919307521	0.9281673696334324	3.0	85.0	1.8939857717956903	0.01084029991620739
0.7610765165864777	0.6515095892695577	1.6837305252060653	1.8307916569032263	1.0697151403167486	51.0	60.0	1.7114758760553008	0.012920682618682518
1.1744005448825918	0.7794331620828038	1.5757697761617013	2.0440130855432486	0.8696125406606569	57.0	85.0	2.350487130728799	0.01450540919506525
1.2393978996105588	0.5754620816065379	1.6606180500826224	2.3670925005925785	1.1276946009820197	45.0	88.0	2.0990545654215826	0.012156132617244332
1.7737780270153822	0.45129404265341844	1.5761001306536597	2.8323949230101007	1.0586168959947184	51.0	123.0	2.6755617955149584	0.01154342967648464
1.3950856427411278	0.40476302674775066	1.5273316252095126	2.4998774294651174	1.1047917867239896	40.0	98.0	2.2627588831719496	0.012021253683369398
0.9943598111648135	0.3669786175635099	1.5445261489754374	2.1800093150151763	1.1856495038503627	31.0	74.0	1.8386625287959542	0.011873739315946541
0.5568847568876354	0.4137256044826836	1.3973175873097432	1.574766898444727	1.0178821415570916	37.0	50.0	1.5471014119923043	0.012591355361506329
0.9259339730771963	0.41687675218733267	1.446318240002567	1.9992699597303702	1.073335986653174	39.0	79.0	1.8626692709376123	0.01135913338121692
0.9808799402492663	0.5558819424056265	1.821106451069326	2.19405583015292	1.2131758899036535	57.0	82.0	1.8085224479091524	0.01042453055191815
1.5323402183423545	0.3295972410419137	1.342868070202167	2.606088583458766	1.0737483651164115	34.0	140.0	2.427094343632574	0.009137358490047638
1.1729601539227337	0.6663780138874622	2.0086123186631037	2.539422184744534	1.3664620308218003	41.0	69.0	1.858392057346304	0.01295731729394777
0.8478069696645536	0.2435278596632071	1.5948995342889873	2.145185773713125	1.2973788040485712	30.0	67.0	1.6534768157294586	0.01082840025198125
1.070627872060269	0.20867598915295837	1.2011822056009929	2.095788447367299	1.0251605753070299	21.0	96.0	2.0443513902586647	0.010746283260968112
1.024779364072178	0.12509863614461336	1.160928234166678	2.049238887086691	1.024459523014513	16.0	84.0	2.0003122046801067	0.011907442743999309
1.2728730320021744	1.20353268095076	2.129315466664523	2.267445527730133	0.9945724957279586	81.0	87.0	2.279819256484183	0.013665740832320849
1.1946393436473073	0.6398067522530793	1.874708079890354	2.4656868789162822	1.271047535268975	50.0	83.0	1.939885653760779	0.011517730307203575
0.8484443675000812	0.7669579740153094	1.8410159249017406	1.9432381684129383	1.094793800912857	64.0	70.0	1.7749809752234935	0.011825765163766043
1.6618009787330865	0.38683196419829846	1.4576993614143092	2.715728388220822	1.0539274094877356	39.0	109.0	2.576769864578064	0.012528107280352727
1.3911054478068616	0.36457470716707574	1.809410737498079	2.8361840837925416	1.44507863598568	39.0	115.0	1.9626503452235984	0.008459158028175965
1.3700571425740424	0.5380816041814271	1.965489449907431	2.7802240377296568	1.4101668951556143	48.0	106.0	1.971556733660844	0.00923901156736918
0.714998932468915	0.9533445538380274	2.4894100634005634	2.2060200784351447	1.4910211459662297	54.0	42.0	1.4795364132851199	0.013455838179537058
1.262061781256228	0.35688617129867795	1.5690736925388986	2.4763054673066023	1.2142436860503742	33.0	87.0	2.0393809708505826	0.011817601220818196
0.6274977417107219	0.6623185431230083	1.9807059566026586	1.9268572185958373	1.2993594768851153	47.0	44.0	1.4829285142976665	0.012919296664812582
0.9923767032462534	0.392533593259516	1.529076309697457	2.113337314556806	1.1209606113105526	42.0	84.0	1.8852913235604527	0.010890327051709902
1.2519031833505576	0.4151472146699928	1.8948793444283818	2.6427779893880428	1.3908748060374851	39.0	76.0	1.9000832985947536	0.012185035090665916
1.9799126543905352	0.5305577162367263	1.5445804641351444	2.9889783257123557	1.0090656713218205	48.0	119.0	2.962124676976632	0.013164977861332892
0.833377612623097	0.28308698001052934	1.726814675335857	2.2481979478672356	1.4148203352441386	27.0	63.0	1.589034234144854	0.010605558832306674
1.4117458117420414	0.796966040929943	1.9810861231643055	2.5459193948955536	1.1341735831535122	65.0	100.0	2.2447352263458242	0.011665452845364537
0.6301615591509793	0.12081925119800263	1.1528267175779798	1.6601159959944263	1.029954436843447	19.0	76.0	1.611834404133708	0.009061888586464258
1.2600854101035224	0.277051619055783	1.3343020972121808	2.2731635317207344	1.013078121617212	35.0	97.0	2.2438185991935193	0.012020165427173489
1.2120635192123457	0.24152907200863305	0.8701294357140597	1.813663160644827	0.6015996414324813	35.0	95.0	3.014734444199927	0.01675822027930187
1.2328865688180914	0.273708057981805	1.0402822302061772	2.005588456619395	0.7727018878013037	36.0	111.0	2.59555268115913	0.01239677270250576
0.5302262774017915	0.830129725514581	1.562755494384358	1.3966021105425437	0.8663758331407522	77.0	54.0	1.6120049257140932	0.012756595411775538
1.0383489902662968	0.5227375981482663	1.8410459962309333	2.3117189582290467	1.27336996796275	47.0	73.0	1.8154338616353105	0.011785128384096937
1.3329994738278743	0.5029556896055251	1.5849359110166208	2.3719029252966912	1.038903451468817	55.0	109.0	2.2830831122403725	0.010926453024613326
1.6607423780346726	0.7381605929414596	1.9154376903345494	2.864005094096024	1.2032627160613514	54.0	106.0	2.3801993162979342	0.011802664046311993
1.1532908462137792	0.2797446932414033	1.1920784510927274	2.090045732698984	0.9367548864852049	36.0	121.0	2.2311554098650483	0.009568520720554523
0.8598943326298891	0.6099998797275676	1.5666170534681325	1.9070779881111688	1.0471836554812797	50.0	74.0	1.8211494976348601	0.011687153481001107
0.7021340648285638	0.5892740319516614	1.3625258697517129	1.5129395815986815	0.8108055167701177	78.0	92.0	1.8659710008209467	0.009781810492876087
1.1953572083519335	0.7768057422570356	2.01034540724122	2.4645843461454633	1.2692271377935298	52.0	77.0	1.941799283010908	0.012433689378334927
1.0424526811613988	0.6747183463475077	1.9374610068619265	2.265465032668218	1.2230123515068194	61.0	82.0	1.8523648022663377	0.010845954256418005
1.2551476052491723	0.57195480028934	2.0349574409359343	2.734195086477547	1.4790474812283747	37.0	73.0	1.848618872064033	0.012143120772336997
1.0055629078928556	0.6961820536720813	2.2590296211980285	2.5126066076239786	1.507043699731123	41.0	51.0	1.66724203689134	0.014460069774095809
1.2030694138496743	0.27110766742931847	1.2514837865837651	2.16522585547626	0.9621564416265859	33.0	98.0	2.250388566557648	0.011940552326037437
0.8407466307070434	0.1886458512290441	1.1446245006433404	1.8080607129472437	0.9673140822402003	30.0	115.0	1.8691557852233065	0.007846841876935648
1.0169458642101097	0.2061496171506101	1.288932819633406	2.090311882219959	1.0733660180098494	22.0	80.0	1.9474362399656089	0.012019701181306668
1.4738962324325902	0.2317824303460143	1.5689642333686502	2.8055670292732455	1.3316707968406554	21.0	95.0	2.1068022486708875	0.01131636741525378
1.175709035294227	0.5456048700440642	1.4014841576858195	2.0681989977450144	0.8924899624507875	54.0	101.0	2.317335863437295	0.012004625312765244
1.4151882894308765	0.27515083473791124	1.517621840811949	2.67139349396765	1.2562052045367735	25.0	97.0	2.126558212241071	0.011221859254921545
0.7926281141440457	0.15445207890810764	1.1813237734572697	1.8346333939662902	1.0420052798222446	17.0	74.0	1.7606757177653265	0.011028773206210424
0.9382139908084921	0.9516825816186023	1.8317703483709669	1.9241430725732063	0.9859290817647142	59.0	63.0	1.9516039319270135	0.015312068174600072
1.1090577174757503	0.39549356702597205	1.6008779604585992	2.3625923784680563	1.253534660992306	30.0	83.0	1.884744356887438	0.011016492197269459
1.235861063067163	0.46959736081354575	1.4477516138615665	2.209972467542686	0.9741114044755231	60.0	117.0	2.2687060816545617	0.01010145055745224
1.0007539203601936	0.6692799565635894	1.9880939217100546	2.3385901404160943	1.3378362200559006	55.0	75.0	1.7480391884728443	0.010743167044083964
0.8771281086054215	0.3882379949899022	1.5353743654945633	2.009901319864237	1.1327732112588156	42.0	78.0	1.7743192546288205	0.01060596946441438
1.0704757607916646	0.8706374753434005	1.7896127054337776	2.102775936448392	1.0323001756567274	68.0	88.0	2.0369810894497338	0.011664006669763437
1.08498803210756	0.28297873646173244	1.4980933319401761	2.278408616779064	1.193420584671504	39.0	105.0	1.9091413756753737	0.008884989915277893
1.2744408824086055	0.6229856170314628	1.5236897526775908	2.2253368520054746	0.9508959695968691	60.0	111.0	2.3402526913105994	0.01105102986282663
1.1251821638546173	0.5156562297931038	1.7637781687375556	2.327579241568083	1.2023970777134656	46.0	74.0	1.9357825170319911	0.012877255088742953
1.0055586313841343	0.40547715257524364	1.6423048461497436	2.2333745914797576	1.2278159600956233	36.0	73.0	1.8189815608080389	0.011823711209923284
1.20800658008103	0.5053336292658108	1.4214127848972051	2.118521829851621	0.9105152497705911	60.0	110.0	2.3267285532948443	0.01107548099285574
0.6354173609288387	0.6147919229457517	1.8042699272062275	1.8449135168228683	1.2094961558940296	52.0	54.0	1.525357073548658	0.011280500097357215
1.2232982844189493	0.28785630668684314	1.3828417593668008	2.2642824620896396	1.0409841776706903	41.0	101.0	2.175136289925372	0.011100057429066714
0.9103815874079095	0.4490289146385742	1.7962190079017286	2.234097239500686	1.3237156520927766	41.0	71.0	1.687747089768568	0.010635193397925796
1.5102395747923185	0.44085289214364587	1.6760397750243707	2.734842389707613	1.2246028149152943	37.0	95.0	2.233248491999246	0.012201513555379805
1.2361027667690676	0.33369097448236573	1.3860163801282412	2.29933731018817	1.0632345434191022	42.0	120.0	2.1625871021779104	0.009272985342658776
1.3743948920536972	0.225412790899715	1.484988588109224	2.5881209324686454	1.2137260404149481	27.0	95.0	2.1323765382703823	0.011499602251176941
1.2809621389882109	0.1485902072747337	1.0490753274252347	2.1768087087690007	0.8958465697807897	22.0	122.0	2.429890097476912	0.010499107074137445
0.8650430025373146	0.5043265031269641	1.6829090322127127	2.061156115686556	1.1961131131492413	51.0	80.0	1.723211703832714	0.009813749420344724
1.2692273181266494	0.3633557427957793	1.446222715264251	2.321589086322055	1.0523617681954058	45.0	110.0	2.2060750936468603	0.010377108185024566
1.1472857401442982	0.16257756137724466	1.1408741546936678	2.131752603088751	0.9844668629444528	19.0	98.0	2.1653878696463877	0.011373729257279436
1.0357440262617705	1.0895185975227377	2.26011973557129	2.0793232367660415	1.043579210504271	85.0	81.0	1.9924920081162651	0.012278690587392359
0.8609917465927865	0.4770538438815015	1.4860401533299765	1.9041359826141455	1.043144236021359	51.0	84.0	1.8253813009375217	0.010335688782122593
0.7459623723549019	0.5072186539280391	1.4479751308099449	1.6901723731339968	0.9442100007790949	52.0	71.0	1.7900386267243376	0.011830855201736181
1.0283462153953307	0.4856837271792531	1.6109079822118193	2.1631886451028284	1.1348424297074977	42.0	79.0	1.9061577083087948	0.011780601105561892
0.8236578647209709	0.40519346435252834	1.7082184931263484	2.1024221129659795	1.2787642482450086	35.0	58.0	1.644104545346313	0.012367276552619669
1.1447947244976928	0.8607500091414646	2.0547072825153965	2.296722909296445	1.1519281847987524	65.0	78.0	1.9938073741096058	0.0127631542909057
1.209806628636248	0.5572367117911202	1.787624789118402	2.352594113881113	1.1427874852448647	64.0	104.0	2.0586453249241026	0.010016300920255026
1.046902114937259	0.7266770719424196	1.8035946217070542	2.1460751232108413	1.0991730082735822	59.0	79.0	1.952445253892813	0.012218760710173004
0.89290004877744	0.5665875395699254	1.543006616856624	1.8827727665577043	0.9898727177802643	58.0	85.0	1.9020352139613663	0.010912281838353766
1.1310620874264727	0.40931917713534416	1.4721334464499987	2.2175112231695713	1.0864491357430985	40.0	93.0	2.041063083595589	0.01106796529849127
1.1777013341082283	0.438182827026499	1.258137766297656	2.0372791655414	0.8595778314331717	50.0	113.0	2.3700927258031426	0.011017199143281578
1.4566832452178324	0.6062526172288698	1.5159318057571178	2.4026546370440975	0.9459713918262651	56.0	112.0	2.539880865113269	0.012006793106834626
1.0468590217996132	0.20353889943921977	1.4193642700224085	2.2749135125450057	1.2280544907453925	22.0	95.0	1.852453233703173	0.009362496013539142
0.7024264363500485	0.47505110256432026	1.6388222429521602	1.8188667454287526	1.116440309078704	63.0	79.0	1.62916613690677	0.008913085222459127
1.0829738518457899	0.34938201483781706	1.2816489886097662	2.006832816644024	0.9238589647982342	50.0	116.0	2.172228546899803	0.009648068116775231
0.8835482287592389	0.40793264548457353	1.4678209174891264	1.9795915728933446	1.0960433441341058	39.0	82.0	1.8061252627351687	0.010401194555348497
1.541620275911742	0.6943904107125372	1.8454283822956874	2.706794871740486	1.1651745958287438	69.0	129.0	2.3230809197442612	0.009426662080120003
1.4917920345858744	0.4336714557144731	1.1877127556713392	2.2301258308599956	0.7383337962741212	56.0	125.0	3.020484558764552	0.012758240090309406
1.1813506082172291	0.34395384329831313	1.3800798977555502	2.2100612023431596	1.0287105941259305	42.0	103.0	2.1483799379173236	0.010711156839220087
1.023225148753664	0.564032796300062	1.2188997102130743	1.7794479548175486	0.7562228060638844	52.0	100.0	2.3530736451595775	0.012345464739170144
0.65204439115444	0.5069935045125973	1.6288003138642682	1.824876987047706	1.172832595893266	34.0	46.0	1.5559569144288854	0.01386526329585218
1.1585372973433623	0.9658763513815161	2.2109298890102727	2.3724852520511264	1.213947954707764	73.0	81.0	1.9543549975519825	0.01193447590764493
0.9819484734966435	0.8931477248956483	2.030978880746876	2.1746731366330643	1.1927246631364208	51.0	57.0	1.8232817714312082	0.01520241287471006
1.2851947173686424	0.37132303346303597	1.6818325459854526	2.5530201721126446	1.2678254547440022	33.0	79.0	2.013700042509517	0.012782896175148422
0.8298332028641588	0.3047557724084182	1.5525410618554354	2.025189419873186	1.1953562170090273	41.0	82.0	1.6942141522805096	0.009275807877134917
1.1437920032562956	0.41656811213172595	1.6914159951879968	2.464355005818127	1.3205630025618316	26.0	68.0	1.8661396700024093	0.01323613187936576
1.2725141655030219	0.5241981169072427	1.6601272156953486	2.4240077350508336	1.1514935695478117	37.0	74.0	2.105098803115969	0.014511999297035477
1.1457925869336303	0.18393471641119907	1.1903732336513626	2.170433555586073	1.024640968652443	21.0	105.0	2.1182381165575683	0.010312997861724824
0.43622593163236933	0.6979075553919805	2.0605910697853043	2.0051645838012293	1.56893865216886	49.0	32.0	1.2780388710733475	0.0110603661244142
1.0909547142445308	0.5245272292284411	1.7605846962717722	2.2967111282489356	1.2057564140044048	53.0	85.0	1.9047886468390334	0.010936834433105861
1.0131375178570325	0.6978872588214715	1.7602900413796259	2.1287889833199607	1.1156514654629281	41.0	59.0	1.9081129270391282	0.015799094174230713
0.8603032445634449	0.5076331740949158	1.4164802956967026	1.8776192990761416	1.0173160545126967	43.0	84.0	1.8456597541611959	0.010525435926975392
1.1394803295672506	0.12744570027041946	1.339003224859403	2.3431165029057412	1.2036361733384906	13.0	80.0	1.9466983086813578	0.012012866480272655
1.160504203341113	0.2521706839194311	1.7137685243207572	2.6200072586011705	1.4595030552600574	23.0	83.0	1.7951365357945974	0.010169802141754678
1.2830819261395585	0.4620147645131987	1.7108687142070886	2.523466371339142	1.2403844451995836	44.0	98.0	2.0344227800543764	0.010455301240091015
0.993148186172715	0.4717099049687933	1.25973312019097	1.7878911604074108	0.7947429742346958	65.0	112.0	2.2496470159161523	0.010443737955983487
1.2849003208018197	0.21492171454824638	0.9749990559770777	2.0383519051044674	0.7534515843026476	29.0	105.0	2.7053522051998224	0.013674442174205385
1.006176665757564	0.006586686744304515	0.833486442777429	1.8272263382476175	0.8210496724900536	2.0	104.0	2.225475996727534	0.011097249427179929
1.2914755109735199	0.109812726379385	0.9028112227815823	2.0617840872036806	0.7703085762301607	19.0	112.0	2.6765690410639276	0.0126820077401237
0.7239862146199991	0.41479886701143576	1.3587712041498408	1.6843175176757044	0.9603313030557052	50.0	82.0	1.7538921331797963	0.009884878326187419
1.5003636624631955	0.6564120387708658	1.5355172992757709	2.378161105280845	0.8777974428176495	77.0	138.0	2.709236766112197	0.010419467241426535
1.3252243251706057	0.5138839341005443	1.5402393730029418	2.3433259306038363	1.0181016054332306	57.0	111.0	2.3016621505146198	0.01083491966680121
1.0812216814361522	0.5470189106363721	1.5146815034201258	2.0881651018195804	1.0069434203834282	53.0	94.0	2.0737660722033815	0.01119418257947057
1.2639004663810753	0.5427965082852397	1.6346301546248432	2.3926181560357707	1.1287176896546953	44.0	92.0	2.119766685651694	0.011781581323701702
1.089029210308902	0.6958278645447586	1.6296407834320594	2.1114225730706355	1.0223933627617334	50.0	78.0	2.0651763303384216	0.013413653437266694
0.700279811711237	0.7319323833360853	1.8773547582913106	1.9369200986918478	1.2366402869806108	51.0	54.0	1.5662760780833405	0.011987750559977617
1.8986478459644023	0.2663018795439023	1.3003311562308113	2.983185674891845	1.0845378289274425	24.0	138.0	2.7506515635716244	0.010578068109208777
1.2644258436094744	0.16024306578415626	1.288700142416214	2.3924743071733827	1.1280484635639083	24.0	135.0	2.120896738438614	0.008034625045114745
1.335020772367272	0.20889859210922812	1.2571603959369744	2.3633663388538904	1.0283455664866183	24.0	98.0	2.298221936161422	0.012250184936796412
1.63949282967096	0.43747471452030884	1.879954591523691	3.0269579240621742	1.3874650943912141	50.0	130.0	2.1816461807209135	0.008657054957046172
0.870708111028605	0.8353307713301694	2.1816069149528112	2.253259345190333	1.382551234161728	54.0	57.0	1.6297836127255962	0.01236281455702149
0.8432590356153151	0.4733836658105546	1.6532647272398941	2.021588705905881	1.1783296702905657	40.0	67.0	1.715639312899059	0.01162307880598774
1.1003151667096494	0.26124800989693586	1.263344291859957	2.103064223056169	1.0027490563465196	33.0	103.0	2.0972986309442248	0.010374099990907762
0.9115850998705037	0.3349859903630279	1.463642972281499	2.0593485361340043	1.1477634362635005	28.0	68.0	1.794227339074447	0.01240239264293763
1.0412475854855603	0.4266027223128852	1.7762897234127755	2.396511488868438	1.3552639033828777	33.0	68.0	1.7682987666730439	0.012093559543055354
1.0940159647188945	1.0745432989840593	1.946942703708496	2.2235872393025473	1.1295712745836528	77.0	77.0	1.968523181613428	0.012689788337431855
1.3289242424712178	1.4250316095858286	2.678662804553904	2.4655498362795343	1.1366255938083165	86.0	81.0	2.1691838101397978	0.013792003800582655
1.177082199398929	1.154184083366373	2.0771121729237936	2.2099213646919234	1.0328391652929942	76.0	82.0	2.1396568206870974	0.01338267587180899
1.186670993867726	0.3013050555879402	1.446487555890575	2.247336072080124	1.0606650782123979	40.0	83.0	2.118798967028964	0.013051165185491294
0.8137384640993932	0.46237271334239516	1.6798102253966445	2.0780315996538277	1.2642931355544345	37.0	66.0	1.6436311652855269	0.010861918047953605
1.3323591535975	0.45080765036947634	1.476657662869802	2.257424724412239	0.9250655708147391	60.0	108.0	2.4402861760643004	0.011917132821730096
1.6144413812135945	0.5135297917256235	1.503123919199348	2.5664240623469032	0.9519826811333088	50.0	105.0	2.695872638451413	0.013626212768130936
0.8157432342479058	0.745854259977584	1.471456332249204	1.652212370166167	0.8364691359182612	72.0	86.0	1.9752221561078847	0.011418778190980054
1.164079343438405	0.45352279741189494	1.6624898491316442	2.380337648583265	1.2162583051448599	42.0	89.0	1.9570987828114026	0.01088445591623504
1.0902992450678564	1.1298050868763727	2.14658895333859	2.193871755228198	1.1035725101603415	80.0	77.0	1.9879724576588478	0.01287399700307917
1.3114450442458128	0.5832765233028401	1.9170752248020284	2.656781325856916	1.3453362816111034	50.0	96.0	1.9748083525074458	0.010226173459622772
1.2722651721592513	0.715912003031508	1.6180179260876162	2.2454711523899724	0.9732059802307211	57.0	95.0	2.3072928013221117	0.012696853655862803
1.0355901932897815	0.17455483643209124	1.4088780782318102	2.241709272477072	1.2061190791872907	24.0	88.0	1.8586135574503844	0.01016166859750478
0.9290218222038639	0.31227360517023517	1.1078320692371426	1.7285918025340947	0.7995699803302309	42.0	96.0	2.1619018285556044	0.011586468876287477
0.9897642143296841	0.09615977524403108	1.1843020935133088	2.0758018050101956	1.0860375906805115	12.0	88.0	1.9113535505796788	0.010620393908777783
1.163200629392458	0.465713393842228	1.6984183574176612	2.404540937925494	1.2413403085330361	33.0	71.0	1.9370521696561032	0.013434687462641079
1.069561634281096	0.6573901836072483	1.6143465207448904	2.032670664983237	0.9631090307021408	72.0	107.0	2.110530168636616	0.010071078988943702
0.9769776546804798	0.44165698661428454	1.7624354395648356	2.288256862337658	1.311279207657178	46.0	82.0	1.7450569253103736	0.00979602559998883
1.3831496694396976	0.3490689527413481	1.403972048913669	2.3764895793893777	0.99333990994968	42.0	99.0	2.392423334233862	0.012711845393449675
1.2178853584965874	0.6403829571278028	1.8368036055643606	2.390799841657314	1.1729144831607266	52.0	79.0	2.038341137381708	0.01300500660232395
1.087504128158525	0.3574835210154199	1.361142518822614	2.1244801432169536	1.0369760150584286	34.0	91.0	2.048726404821667	0.011370630042903443
1.1725576794565251	0.519789109921234	1.5161753492109615	2.238467424961543	1.0659097455050177	45.0	101.0	2.1000534373583184	0.010598277611517763
1.084790799078467	0.847105667118371	2.2665412726312413	2.50168331643273	1.416892517354263	54.0	65.0	1.7656126246640618	0.01261798231496547
1.4553443236100578	0.43279656903041797	1.419147945510816	2.428014110363987	0.9726697867539291	42.0	98.0	2.496236794263908	0.013466885667967233
1.103740127986138	0.4106103063498796	1.6785798438053499	2.3907268273221622	1.2869866993360242	36.0	82.0	1.8576158001909222	0.010895757907282443
1.444763933874821	0.2582931345563828	1.4852513281148574	2.6410908658395087	1.1963269319646876	32.0	112.0	2.2076664791806815	0.010201091383831705
1.0696568847882848	0.6253856828261257	2.190080914625459	2.584896756088834	1.515239871300549	49.0	70.0	1.7059323774724757	0.0110080065698945
0.8239315740913853	0.762072670145026	1.7532838148231966	1.8646594674386028	1.0407278933472175	62.0	69.0	1.7916877978944468	0.012193032888064202
0.8718887506162325	0.5099090300328577	1.5562436741796881	1.9349518467165638	1.0630630961003313	46.0	73.0	1.820166511107958	0.01183658131516609
0.6955048074057741	0.5200931207521524	1.5644167926041304	1.8000762999019047	1.1045714924961305	42.0	59.0	1.6296602910093758	0.011941885770094961
1.6654400504081486	0.5453695026785126	1.5248838324505063	2.6807624205187137	1.0153223701105651	60.0	143.0	2.640306664598346	0.009795143388170542
1.3173821726684456	0.4271215121058849	1.8442105371332824	2.648310305346129	1.3309281326776836	46.0	91.0	1.989822170200892	0.010908126410056444
0.8735918854730307	0.9738288006851623	2.251706790072332	1.973209724258743	1.0996178387857123	65.0	59.0	1.7944504487465591	0.01429732348621942
1.0644124967610293	0.9291174226294536	2.269471991153732	2.3696910267555342	1.3052785299945049	61.0	65.0	1.8154677122939504	0.013236019574502813
1.2428607465764636	0.5368931715269682	1.5960072677126647	2.3597482932746305	1.116887546698167	42.0	92.0	2.1127895106814547	0.011729880914345814
1.245477814124225	0.4905646497062468	1.5438063619768732	2.2608661440895923	1.0153883299653672	61.0	111.0	2.22660245087385	0.010403999953861043
1.2909151062279969	0.6552387918081457	1.7942841316149318	2.3611307849054533	1.0702156786774564	73.0	108.0	2.206219579798415	0.010570151723041713
1.380471617303886	0.4895454112911515	1.6031379468534372	2.4904132808786166	1.1099416635747306	47.0	98.0	2.2437334885311664	0.011896952268251264
1.1471479993443594	0.20362780363805633	1.3390530519921433	2.2486744502717992	1.1015264509274398	26.0	93.0	2.041416661741085	0.011070652393127663
1.0103310616947057	0.4066769360413629	1.31730074936876	1.9687836363090117	0.9584525746143059	36.0	83.0	2.0541273386440393	0.012512356860299225
0.7376498560373801	1.048947329274294	2.5329215916473244	2.2906923765626273	1.5530425205252472	82.0	61.0	1.4749708049126067	0.00919158030369778
1.100696774597134	0.44326914199436573	1.5999293801282202	2.251520946249637	1.150824171652503	36.0	71.0	1.956442175711873	0.013637077053631295
0.8587393728781743	0.34221087055674526	1.5642683550093892	2.045109691027909	1.186370318149735	39.0	71.0	1.7238375402188633	0.011065124180154075
1.149854000764714	0.5993096159466602	1.7504589451466335	2.2929520809183646	1.1430980801536506	64.0	105.0	2.0059101845487795	0.009564352477467331
1.0662794056679874	1.2952683560047364	2.7598597712673727	2.270487665092455	1.2042082594244676	77.0	66.0	1.8854609635193824	0.013862383050145415
1.2683795960396562	0.568388498414941	2.0210409813590084	2.669737081438859	1.4013574853992026	52.0	85.0	1.9051078038651463	0.0109396780877262
1.1876776386362142	0.7342600008165479	2.1131455655132516	2.5759152430260728	1.3882376043898585	58.0	84.0	1.8555290786538001	0.010617031073784302
1.3053232508058858	0.7029379086127634	2.2220094381636217	2.7995653167844963	1.4942420659786104	48.0	79.0	1.8735688015522454	0.011465683007130535
1.3266833995733434	0.40290085493340677	1.6677118370927182	2.598271056517358	1.2715876569440145	39.0	99.0	2.043328308770895	0.01041334369292281
1.157184887366087	0.5552687298435233	1.5978289505767331	2.230056994832689	1.0728721074666019	42.0	77.0	2.0785860488987593	0.013709123033840457
1.2003898376570494	0.19864238645937804	1.1791063317685637	2.1772580569687356	0.9768682193116861	24.0	98.0	2.2288145053002744	0.011798740329135362
0.693019071225875	1.2278297874062098	2.4154109847088647	1.8412637069370186	1.1482446357111435	78.0	50.0	1.603546535008776	0.013625324429532409
1.1719499956666604	0.6506925500841942	1.548258153749024	2.1431276822931777	0.9711776866265173	56.0	99.0	2.206730768019955	0.01153445075233456
1.1131433063002116	0.4870904099175475	1.6688369524202902	2.3402443246443805	1.2271010183441688	45.0	98.0	1.907132574791821	0.009504134045292118
0.9838428520331717	0.3526397154491925	1.651556291444416	2.2841804943674133	1.3003376423342417	31.0	73.0	1.756605684556721	0.011134114761432497
1.211175319799494	0.27717287487326625	1.371083321220197	2.27501887838449	1.0638435585849957	37.0	111.0	2.138490062778086	0.00987921174104768
1.0664520781278777	0.37275330739914314	1.3514498048603152	2.0816848030718282	1.0152327249439506	46.0	118.0	2.0504508492737514	0.008779162387125356
1.5297513693383484	0.7617943475374779	1.7670976931845672	2.4763921037242156	0.9466407343858673	70.0	108.0	2.6159788119943665	0.012845841257760362
1.2606418617722288	0.8849225238608225	2.1411928458330896	2.4540567101956983	1.1934148484234695	62.0	78.0	2.0563316381035213	0.013334268669192158
1.0461925927027609	0.42667420156794966	1.5041719098172346	2.138076561900624	1.0918839691978632	42.0	89.0	1.9581536337339316	0.010893190573311852
1.5762124076191024	0.5929754439252117	1.5188636826777921	2.5419004583712317	0.9656880507521293	53.0	119.0	2.632216952867403	0.011733431965873056
1.3424239738589134	0.5285453064213792	1.4931807043190273	2.3539848909702896	1.0115609171113762	58.0	131.0	2.327081692412903	0.00930169356925119
1.3418367770335347	0.23223273073436657	1.1792150762327374	2.272628014809729	0.9307912377761944	27.0	98.0	2.4416087330596192	0.013141143137498187
0.8318219244496794	0.37950284862380324	1.3844804552722716	1.8798792372275628	1.0480573127778834	41.0	85.0	1.7936798057779202	0.00991673381386483
0.9437590394879842	1.1963917242572084	2.1911183314639366	2.2008633818945347	1.2571043424065504	81.0	67.0	1.75074041800006	0.012059181962186603
1.0206838257394624	0.6152149720521309	2.018198273785348	2.4387166522463857	1.4180328265069233	55.0	86.0	1.7197885737622443	0.0090957117992275
1.0695832500046563	0.562462846459606	1.5932816309770037	2.126860677457171	1.0572774274525147	43.0	70.0	2.0116391613332674	0.014405307775537404
1.3174271277519876	0.29536848249499226	1.2527016070749868	2.281241222369999	0.9638140946180114	34.0	106.0	2.366889252926026	0.01172634154483179
1.0171908395776676	0.6780876199576047	2.0840776855588867	2.3605265384991596	1.343335698921492	57.0	73.0	1.757212691060267	0.01114094279603527
1.244914886052832	0.5235373452164429	1.5948983920596096	2.36735140044263	1.1224365143897979	45.0	102.0	2.1091183065526145	0.010555294336700091
1.074330273821571	0.28766579424561445	1.387494123124619	2.1779997419556025	1.1036694681340316	32.0	95.0	1.973416683926154	0.010323111695643672
0.7696268411176008	0.5978250042105837	2.0457955615264476	2.217707128333377	1.4480802872157763	56.0	67.0	1.531480780390542	0.00917801883096346
1.7218843608313952	0.5508133512413353	1.5419552218439323	2.6500703575478584	0.9281859967164633	77.0	159.0	2.855107022647085	0.009519149845911774
1.2213310185260298	0.4614754342477494	1.8027433456430322	2.4927692966273427	1.271438278101313	52.0	96.0	1.9605900967130625	0.010117582716729634
1.1067425434579445	1.0941340508848458	2.029466618326555	2.136983882213642	1.0302413387556975	76.0	81.0	2.0742556154800034	0.012994983850205243
1.1544858155741173	0.5898698980163561	1.6776394144957545	2.281304808186108	1.1268189926119905	47.0	84.0	2.024553032158248	0.012114326597468134
1.4212297800190525	0.5791192058108388	2.342636037145024	3.0855096049639648	1.6642798249449122	52.0	104.0	1.853960829613551	0.008563565029815829
1.148727556502598	0.5105608037934684	2.0839371015105956	2.7147267796810928	1.5659992231784947	36.0	67.0	1.7335428648368267	0.01184661955380009
1.0184307687817764	0.5201437386746126	1.5094207410899045	2.050902926491904	1.0324721577101275	55.0	102.0	1.9864002251068031	0.009707415001170215
0.9167870273286829	0.3871444722753963	1.4168541801588221	1.9425510111392643	1.0257639838105814	45.0	88.0	1.8937602039047392	0.01046879161471385
1.077972113414036	0.258606105163135	0.9987565559873137	1.8147798564351962	0.7368077430211601	41.0	119.0	2.4630303815673638	0.010928020366733397
0.8475744034627304	0.9812153862013402	2.3734777290279596	2.0632374478541564	1.215663044391426	67.0	59.0	1.6972116223924822	0.012935024800931321
0.6124666107760147	0.4146698087074624	1.4148653111012495	1.6033684439050506	0.9909018331290359	53.0	70.0	1.618090097625502	0.009918456305377488
1.0818653455970981	0.29646319929044207	1.2853700606416907	2.10258294772384	1.0207176021267417	29.0	92.0	2.05990662191281	0.011332379779995799
1.115760685259889	0.5085247884589881	1.6422166079088347	2.2510724393681567	1.1353117541082678	58.0	108.0	1.9827791187947885	0.00914374046827009
1.1884398960085707	0.8180406319851237	1.728515787200062	2.115709151245732	0.9272692552371611	69.0	94.0	2.281655667214602	0.012660437083033785
1.3206917888767848	0.2703905909024462	1.4082951708284455	2.4641630902883827	1.1434713014115978	28.0	103.0	2.154984639532633	0.010754151320358616
1.108033219310768	0.4119631772116896	1.373298030025438	2.0620943506377025	0.9540611313269344	55.0	112.0	2.161385977195911	0.009928185085780392
1.1998050706537073	0.9207050892843256	2.2089095449656897	2.437986707783303	1.2381816371295957	62.0	72.0	1.9690057053625392	0.013575934605248195
1.0835444082524404	0.5324077946107355	1.8015135114035605	2.362071219091567	1.2785268108391266	34.0	65.0	1.847494474942833	0.01362415461385836
0.9542523006767565	0.8613339380416969	1.8318154180457509	2.0108044337865794	1.0565521331098229	70.0	81.0	1.9031757835441965	0.011461837281504033
0.9248684404510319	0.8915391680190352	2.0716292967158965	2.121162721538643	1.1962942810876112	68.0	70.0	1.773111144199559	0.011804042453528186
0.8876743893034308	0.6645003363215135	1.2886440980324216	1.5236222558550956	0.6359478665516648	80.0	100.0	2.39582886584197	0.012605248600387413
0.7702708449742146	0.5014009514692956	1.8598823003380782	2.118750118469527	1.3484792734953124	47.0	67.0	1.5712144488343833	0.00972955375821709
0.8342809692501798	0.7375130266491394	1.7906286831241625	1.9168740721066917	1.082593102856512	46.0	52.0	1.7706320750140196	0.015851239639855512
0.8873564682869353	0.45595335435042084	1.4287219662448043	1.896782256419202	1.0094257881322668	42.0	80.0	1.879070535664444	0.011375240287264245
1.4217171548949312	0.2932656280088879	0.9440162343591386	2.107030949096347	0.6853137942014157	46.0	168.0	3.074549158246017	0.009645088535212756
1.0635866300718635	0.3860762755042517	1.615348318010268	2.304574023989308	1.2409873939174445	40.0	89.0	1.8570486979037093	0.010033838741146961
0.8459787920589932	0.4702192368690761	1.4662940152001247	1.8695399523501526	1.0235611602911594	56.0	87.0	1.8265053666342208	0.009989494168157344
1.0852272145901094	0.4877970986912942	1.3879216587237797	2.0302641549898235	0.945036940399714	55.0	111.0	2.148343697687733	0.009938962323813789
0.8567201665043847	0.41891326011009244	1.6957141459208904	2.1364628177220935	1.2797426512177088	37.0	71.0	1.6694472249472914	0.01041366883416011
0.7833674229282517	0.22970275292417042	1.4475622447641874	1.9827300211839347	1.199362598255683	29.0	72.0	1.6531531198884788	0.010072504964767514
1.284105239062694	0.6537351630993532	1.590739616278188	2.197871555443586	0.913766316380892	56.0	91.0	2.4052884375828	0.013914394610940793
1.2822452155858932	0.26966928903242815	1.324182617518202	2.3158485394992603	1.033603323913367	28.0	88.0	2.2405583321182956	0.013225662352478565
1.1945639894357092	1.2525238386197046	2.6068703627992686	2.6577210622524277	1.4631570728167185	87.0	83.0	1.8164290844974411	0.010374759546526781
1.0390200674698873	0.8985087981330067	2.272915370261554	2.338380928950375	1.299360861480488	76.0	79.0	1.799639344443568	0.01073047864755883
1.2601320126581357	0.4455997463187009	1.5814016292972313	2.389664484260097	1.1295324716019615	53.0	116.0	2.1156226530353317	0.009319675243411034
1.1390506401202267	0.8011600594330637	2.1968052032350256	2.5390000301535665	1.3999493900333397	53.0	69.0	1.8136370130445219	0.012447619409897363
1.0558189167524739	0.33526731197852044	1.1929568539917113	1.881224302047471	0.8254053852949973	41.0	86.0	2.2791519604335115	0.013819733932803165
1.2931389729931762	0.24523875780073068	1.1230774158871482	2.188706887106997	0.895567914113821	30.0	122.0	2.443931780732406	0.010567246022209513
1.2612784724639687	0.787436854002584	2.0590790514467394	2.583954785045852	1.3226763125818835	58.0	86.0	1.95358060053403	0.011233962549350008
1.2323389891786276	0.8265887451601066	1.9466857488094227	2.3693622745705873	1.1370232853919597	65.0	88.0	2.083829157248798	0.012036784126130807
1.3211608621632527	0.5947018012545499	1.4337810774211428	2.167619786597636	0.8464589244343834	70.0	121.0	2.560809182850866	0.011211568226372138
0.8967566637325197	1.012103176244306	2.124985183507533	1.9008948145993474	1.0041381508668277	72.0	65.0	1.8930610424057583	0.014164937415238223
1.0076650196675967	0.46412984345978336	1.5604614723389827	2.1127518533643093	1.1050868336967126	46.0	84.0	1.911842390065202	0.011130518978765812
0.8525678789699795	0.3751269899669709	1.6058133570893147	2.0723183758331496	1.21975049686317	39.0	77.0	1.6989690770059342	0.009930644080772667
0.9150541091219051	0.14239087464074185	1.2976362813369484	2.0721202457423726	1.1570661366204675	14.0	71.0	1.790839935731396	0.011839949236801392
1.1058635977476283	1.140830733153115	2.288514101344968	2.3579153040758896	1.2520517063282612	89.0	86.0	1.8832411570211098	0.010618811104690061
1.534793491505693	1.0877567715541048	2.3206776508999676	2.821986569536747	1.2871930780310539	70.0	95.0	2.1923568559375566	0.011920869987796946
0.9944660211780845	0.6918208727626826	1.5778687673370764	1.8964369942619785	0.9019709730838941	59.0	79.0	2.1025476992656915	0.013571373802878157
0.9778888983742065	0.3940214426426156	1.4797567081844933	2.0460182827798485	1.068129384405642	36.0	69.0	1.9155153979013042	0.013590327868632929
1.5877598524911138	1.0222274670017781	2.395154550603927	2.90682862905891	1.319068776567796	66.0	87.0	2.203697548373823	0.013102600361370861
1.5097832076313722	0.5317540845788697	1.40982024048545	2.45254799404031	0.9427647864089378	63.0	166.0	2.6014420875669853	0.008309105969144435
1.242769329520184	0.3599406783876319	1.391324996724498	2.237105182316037	0.994335852795853	46.0	107.0	2.249848656292329	0.010932971560062534
0.6166193177538822	0.3119853605987205	1.2321454340327302	1.549909041407873	0.9332897236539907	34.0	62.0	1.6606944254563427	0.011803010257290903
1.4052092254933006	0.4845275169953631	1.5474509537346586	2.4875150778768464	1.0823058523835458	56.0	127.0	2.298347618095781	0.009453519824642409
1.5591477659945872	0.8252598592147062	2.1147968949792926	2.83280189547049	1.273654129475903	52.0	83.0	2.224153190345453	0.013894652509258825
1.3457883908818065	0.3170095661829271	1.7604548409998937	2.758054065369057	1.4122656744872504	35.0	104.0	1.9529286275193372	0.00928499254711881
0.820572041001109	0.5155853650252753	1.4907859350596993	1.8235353213164396	1.0029632803153306	41.0	62.0	1.8181476402038588	0.013910796070573321
0.9822703560569643	0.6965765462778222	1.676731866741661	2.0353408872460617	1.0530705311890973	67.0	94.0	1.9327678697340553	0.010113493368752328
1.369900402440369	0.4564323133425492	1.5883827732124307	2.477935813049327	1.108035410608958	45.0	98.0	2.23633269237081	0.011848314586463531
0.7353949260343149	0.7679965464857048	2.033882674961146	1.9625091012476301	1.2271141752133152	60.0	57.0	1.5992881028421644	0.01188473431060814
1.151824268101269	0.47452644987662884	1.911722519381514	2.5595174845336826	1.4076932164324136	38.0	76.0	1.8182352906554413	0.011349196119553175
1.5612916718819232	0.7373338806371612	2.1679365114104194	2.875782087070374	1.314490415188451	57.0	88.0	2.187754322010853	0.012834667466721631
1.000436241246166	0.5776574527433792	1.442307597050881	1.893595836694362	0.8931595954481959	45.0	69.0	2.120109156688999	0.01571215283778619
1.1589538093117084	0.42342344032022483	1.4975565210098631	2.2467604458453816	1.0878066365336732	35.0	77.0	2.0654042459280704	0.013589924377317318
1.3814947685499948	0.3099477690624267	1.2879174833251301	2.3463393441166045	0.9648445755666097	34.0	102.0	2.4318314094668616	0.012569051128901136
1.6041486769159778	0.50413366957447	1.6648929792883869	2.739993037789737	1.135844360873759	54.0	120.0	2.412296201991945	0.010586725536091506
0.7638480586868754	0.4553848757834189	1.573895825031218	1.8919514341185397	1.1281033754316643	46.0	73.0	1.6771082112883422	0.010218846277530348
1.2056176796285205	0.3437405860978284	1.6117096823461432	2.4339016461955763	1.2282839665670557	40.0	95.0	1.981546378886728	0.010385544574277745
1.4555351223258086	0.2633739818417915	1.096209139244432	2.2476502497027804	0.7921151273769718	36.0	108.0	2.837529763060707	0.01393181041683788
1.154464517593782	0.6725551234413922	2.0953535672964994	2.5761006285977492	1.4216361110039673	50.0	77.0	1.8120675246343403	0.011138139178894519
1.0335614592828135	0.7426032995948686	2.0340639763869155	2.218030739376319	1.1844692800935055	58.0	67.0	1.8725945675866082	0.01350803847501377
1.0571459099552414	0.5687868526577223	1.5952936741014627	2.077726195347907	1.0205802853926655	57.0	91.0	2.0358282685702744	0.011270504050749645
1.0183209066994108	0.41397798804409447	1.4383138483834763	2.038516131902799	1.0201952252033881	38.0	79.0	1.9981627844772518	0.012641444557760308
1.2839877779069864	0.39512743837395425	1.8115408300914488	2.71454469208539	1.4305569141784036	29.0	82.0	1.8975440020465073	0.011269918787888761
1.1389906931968063	0.8339641037088802	1.8882719790089806	2.15293954554998	1.0139488523531734	82.0	98.0	2.123321645419723	0.01108492786129118
1.2087941406150589	0.8776916483001862	1.9628551842518962	2.346027051498077	1.1372329108830184	73.0	99.0	2.0629257463860027	0.010552443366957612
1.0245860427848432	0.6870969309307926	2.000491850258009	2.2653893057823025	1.2408032629974592	58.0	73.0	1.8257441556929088	0.011897049485398893
1.2536705833524113	0.42947631551330767	1.3067718677968485	2.1606793170786838	0.9070087337262724	47.0	114.0	2.382203430613005	0.01098505805990858
0.6100615005393994	0.2175072982035895	1.4584953270051202	1.8510992627751235	1.241037762235724	26.0	67.0	1.4915736805948405	0.008609481276514635
1.4235239330511988	0.19239621829478515	1.409589129240784	2.5964377704499317	1.172913837398733	24.0	98.0	2.2136645401065986	0.011698332774641263
1.3381486957336888	0.6468441203980042	1.8506621713614582	2.5114592506139712	1.1733105548802825	56.0	95.0	2.1404897792556086	0.011557273123642322
0.6530511747363001	0.429162394622308	1.344133684228821	1.5983505892966146	0.9452994145603144	43.0	63.0	1.690840557687273	0.012027628942718851
1.4724437716552776	0.2783622900751106	1.4678226153366716	2.631008572124344	1.1585648004690663	28.0	92.0	2.2709205139489232	0.012861708806162596
0.8703634680161587	0.4476213145593724	1.647208631974164	2.0556860385816016	1.1853225705654429	54.0	86.0	1.7342840587275437	0.009236514153703492
0.9232021812567148	0.5577516673272208	1.396040182678731	1.783188234231446	0.8599860529747312	59.0	89.0	2.073508318028317	0.011821054322817938
1.4340579136202711	0.6039135582066306	1.7689893251009896	2.62106954003467	1.187011626414399	52.0	102.0	2.2081245724206795	0.01120413298778179
1.1331697010511432	0.6563659015365542	1.8619764066223905	2.353038682238939	1.2198689811877956	59.0	92.0	1.9289273836176795	0.010302161225274185
1.0051786767137798	0.5063604119057803	1.5447597481771471	2.064819431240569	1.0596407545267892	56.0	103.0	1.9486032623978011	0.009344081420575408
0.9398370139964081	0.3966401337737975	1.4971741975867234	2.0443914116959143	1.1045543976995063	40.0	77.0	1.8508743579798688	0.011535155386413656
1.2458251844235038	0.38113549586176854	1.6329154171499283	2.4453255020312192	1.1995003176077155	44.0	99.0	2.038620137181938	0.010379727053216888
1.5599637727237625	0.222652931398851	1.24716985649338	2.555926850572683	0.9959630778489205	27.0	108.0	2.5662867504014004	0.012589651690142806
0.9251574817199348	0.5688601497783978	1.5555327671664283	1.9122664988543145	0.9871090171343797	53.0	77.0	1.9372394190113946	0.012389639796843837
0.8985648592770268	0.751616962973638	2.4440901345518156	2.5970016391997444	1.6984367799227176	54.0	62.0	1.5290540512893942	0.00988128074422685
1.1598940561133935	0.6032350542162674	1.6467720888011834	2.2145658461092776	1.0546717899958842	60.0	100.0	2.099767782845429	0.010702297864334064
0.8305228398464495	0.7092912466459547	1.7808206412708116	1.9629675529726478	1.1324447131261983	55.0	66.0	1.7333893038837447	0.012024177385095787
0.696935395478542	1.1065658961868943	2.468247180044068	2.0517758114462827	1.3548404159677407	83.0	57.0	1.5144040488198252	0.010504389004602365
1.2858280137112885	0.609947958308716	1.3318145477571326	2.038563054570117	0.7527350408588286	65.0	109.0	2.7082079934052636	0.01318659214460477
1.4199021415291941	1.3898443815209514	2.501297034459792	2.672299941613132	1.252397800083938	67.0	67.0	2.1337469144660184	0.016319239806351894
1.028804018577107	0.5576100045853363	1.503730231162458	1.9275929049671428	0.8987888863900356	62.0	91.0	2.144655918821242	0.012096112146012578
1.0658171056877488	0.7708207111033316	2.076787546760899	2.4123746123224814	1.3465575066347326	58.0	77.0	1.7915125053599827	0.010924391091954928
1.551836306867658	0.146093605968022	1.3420970649097685	2.6818904382606803	1.1300541313930224	23.0	105.0	2.3732406826872117	0.01187484208726543
1.1635686571836914	0.3381923848966104	1.4755887109729346	2.2297439626889854	1.066175305505294	39.0	84.0	2.0913483469139624	0.012671826017392284
1.2814640137324338	0.13525387722406146	1.1537788565743896	2.3170723466787466	1.0356083329463128	14.0	105.0	2.237402184749383	0.011064996301810702
1.251703534424401	0.6080589146443633	1.5731055011594697	2.268966225717138	1.0172626912927372	59.0	112.0	2.230462441155427	0.010333418345693027
1.4082856668318597	0.3241016202618756	1.7012488867971716	2.7561707795238095	1.3478851126919498	31.0	89.0	2.044811351925447	0.011595143265739497
1.4099872935874933	0.09573450711331932	1.3198074459144415	2.616205052579152	1.2062177589916587	12.0	100.0	2.1689326268634748	0.011169852395479584
1.2273439333267422	0.6710742215765308	1.694000411382781	2.3075002122726356	1.0801562789458934	52.0	84.0	2.136265147228961	0.013036794302315628
0.9454195281712168	0.3289763933414591	1.3274245880818172	1.962060594213841	1.0166410660426242	40.0	96.0	1.9299442642538096	0.00988082483169508
1.1479247415433864	0.5959027162529159	1.5157431812359194	2.015338962455025	0.8674142209116383	60.0	91.0	2.3233870437781574	0.013365159417340896
1.2597304351630907	0.7114366274924431	2.303757909156476	2.7688652615317926	1.5091348263687019	55.0	77.0	1.8347368393811896	0.01137107985409577
1.3385574478520252	0.4955697146060519	1.7168998953365253	2.4813210007968887	1.1427635529448634	56.0	105.0	2.1713336887605554	0.010653156715890484
1.4170948380918755	0.8780499576028407	2.275248723138911	2.7372199972943454	1.3201251592024699	63.0	83.0	2.0734549131295914	0.012675140680292145
1.5693392872839023	0.4318781321711318	1.6391567790015593	2.7284790075364644	1.1591397202525622	42.0	101.0	2.3538827631081114	0.012228143244157738
1.2715065385314361	0.24059378734019843	1.300607835515359	2.374017934219149	1.1025113956877128	28.0	138.0	2.153281991918378	0.008018385985166271
0.897309149355149	0.1758789063968702	1.0412320579653842	1.741748460940898	0.8444393115857489	27.0	86.0	2.062609398975182	0.012145007449472278
0.5550761724327038	0.9397750330433352	2.235622685148458	1.8114563543627082	1.2563801819300044	88.0	57.0	1.4418058963489988	0.00926099919822534
1.1132820560541368	0.6580837006120732	2.252011866719108	2.65994308508889	1.546661029034753	54.0	74.0	1.719797056468746	0.010570788252472126
0.834162506759905	0.30704636188236734	1.1210379157814685	1.678266273966084	0.8441037672061791	37.0	92.0	1.988222703377835	0.01077694960951301
1.2416799129456706	0.4860877707323099	1.3986300006211665	2.162697527680431	0.9210176147347603	52.0	107.0	2.3481608745379496	0.011509637870302436
1.21610260703489	0.36917304268621254	1.4842826267867213	2.304931878593987	1.0888292715590973	46.0	107.0	2.116890075239757	0.010111648184834345
1.2068839946391239	0.8704184630723303	1.914073364932322	2.235598099020058	1.028714104380934	66.0	83.0	2.1731967020763365	0.013491792322517753
0.8231814282292369	1.0684583252201043	2.293122308771732	2.1592858483964137	1.3361044201671768	72.0	58.0	1.6161056095647361	0.011940025494301293
1.169738648467429	0.3975323040104848	1.5613633341279187	2.3365415021112232	1.1668028536437942	47.0	117.0	2.0025161018542823	0.0085625114796525
1.3960961707067598	0.46972003345662594	1.2606335199059755	2.200465599725965	0.804369429019205	53.0	116.0	2.7356405158374395	0.012516195357555437
1.5149500800326856	0.7407612463816384	1.7374751701344668	2.4568368562331027	0.941886776200417	68.0	108.0	2.6084205854805744	0.012807189912454657
0.9011966861010614	0.4565446341933599	1.3772000220852336	1.8292546691593976	0.9280579830583362	47.0	81.0	1.971056445343258	0.012086038167618848
1.3825499065911273	1.0145215054289876	2.283693053741464	2.653533638171702	1.2709837315805748	69.0	87.0	2.087779388703749	0.012206543372227116
1.4722942025089931	0.4737833158791207	2.0513512439070016	3.0289476120137757	1.5566534095047826	37.0	88.0	1.9458073284131845	0.010913282536364246
1.2229938216950553	0.35863310838056994	1.332674765127804	2.235146019443505	1.0121521977484496	38.0	114.0	2.208310197236766	0.01002581437760164
0.9831349097750282	0.7798236035180046	2.1927415547133626	2.325083899054465	1.3419489892794367	75.0	83.0	1.7326171990359522	0.009553649922406473
0.9913702632432173	1.4383590906535633	2.721495559305703	2.2365989656497653	1.245228702406548	60.0	45.0	1.7961350885401854	0.01877546356075044
1.2102047524446453	0.44521727500835406	1.7176650971308836	2.497299799300694	1.2870950468560487	38.0	88.0	1.9402605933421768	0.010866482176395862
0.9896206926903488	0.5305784385499408	1.5418299522936423	2.0387270289219357	1.049106336231587	53.0	93.0	1.9432987472414742	0.010306534477371796
0.6999816387098561	0.48465240485039107	1.499480122470529	1.7434716709462394	1.0434900322363834	40.0	57.0	1.670808169781624	0.012992036894793457
0.8549054306354458	0.5291252351639824	1.7412397919647202	2.0528253815616018	1.197919950926156	50.0	71.0	1.7136582289780606	0.010944780392409396
1.060051047593269	0.6062506788755615	1.5817419580261838	2.0869114485495865	1.0268604009563176	59.0	94.0	2.032322452600218	0.010884354482263115
1.4143254670779872	0.6416109910472749	1.8284585476294326	2.695712866210465	1.2813873991324778	47.0	107.0	2.1037454153486377	0.01002766474319139
0.5246864659347819	0.3207748952603673	1.5308087069260545	1.750174428095542	1.2254879621607602	26.0	41.0	1.4281449366582626	0.012540058538695208
0.8489405189943688	0.2619911216997872	1.8051380106409445	2.363015912222377	1.5140753932280082	25.0	61.0	1.5606989736385768	0.010527742594923482
0.7791408337982815	0.3468124766111085	1.3832699277294662	1.8208466375522918	1.0417058037540103	46.0	85.0	1.7479470988742507	0.009478370855774998
1.1154750041846428	0.391400444764195	1.3476256855734632	2.085543041651286	0.970068037466643	41.0	90.0	2.149893575607061	0.01226961383388936
1.5803954806682465	0.4107455035521339	1.596372363703794	2.789350724035504	1.2089552433672577	38.0	119.0	2.3072406851608753	0.010135869831503897
0.5371654793199534	0.1743385862808121	1.1178727330453264	1.4560245939833611	0.9188591146634078	24.0	54.0	1.5846004798208106	0.01229850267019205
1.1105907762430953	0.3534599621256621	1.3420496868850607	2.059844926446644	0.9492541502035485	40.0	83.0	2.16996146501435	0.013465896662412087
0.8284067246224605	0.9743745671578992	2.0528721364030584	2.131891892776786	1.3034851681543254	60.0	52.0	1.6355321447925995	0.013649232970506332
1.5015373615316283	0.46666779009495984	1.2868147234820873	2.384688341646089	0.8831509801144606	56.0	154.0	2.700204602996672	0.009305641097139264
1.3279696919773585	0.5397720804029924	1.3101605091088064	2.1476119888319865	0.819642296854628	56.0	121.0	2.620181995333127	0.01148485143354988
1.3649396875090292	0.8736125707510645	2.141261696666666	2.661743678372504	1.2968039908634748	50.0	74.0	2.0525412453428573	0.01401907044484349
1.1752745410046592	0.3637198813073681	1.6960096905797588	2.4695249247277844	1.2942503837231252	32.0	75.0	1.9080735503618609	0.012428223784908585
1.6200923478662153	0.6242175700031785	1.82076905191181	2.7332839873815833	1.113191639515368	71.0	122.0	2.4553579908051844	0.010622404791667657
0.9163663658157837	0.35583352303463567	1.2041991277187105	1.818445070038175	0.9020787042223912	46.0	112.0	2.015838597592999	0.009030179741191679
1.6835098794075956	0.5374417503730157	1.5099938263217898	2.5629379372703327	0.8794280578627371	59.0	110.0	2.914323592880364	0.014028737058324347
0.8424398134429602	0.7766205453298092	1.7813200843565433	1.8392799618777316	0.9968401484347714	70.0	73.0	1.845110236346069	0.01210557551862429
0.7942781100239438	0.4533671619677808	1.652935844079374	2.056464895506762	1.2621867854828184	34.0	64.0	1.6292872965867031	0.011003765946410548
1.3687929639610732	0.4437996376697241	1.3851634079231858	2.2473287375449487	0.8785357735838755	60.0	113.0	2.558038961096889	0.011991488830553532
1.1192517839223233	0.19149871921705097	1.0398801387770136	1.9763918897882269	0.8571401058659036	31.0	132.0	2.305797939289783	0.009130803733991598
0.940434889744854	0.30336434917303423	1.324836121890026	1.9943441553763346	1.0539092656314806	24.0	69.0	1.892330032966704	0.013335706155429209
1.0463061903801316	0.8518666516879978	2.377117788458195	2.5132581973172137	1.466952006937082	70.0	77.0	1.713251821076794	0.010087496370030103
0.8657178097311349	0.7008214033763756	1.862207174380103	2.022136161553044	1.156418351821909	60.0	70.0	1.7486199162848095	0.011517381944242162
1.1693887205557643	0.6287615183073563	1.8920820682895123	2.375686584246	1.2062978636902357	62.0	90.0	1.969402960706934	0.010863981468116337
1.233871679679096	0.2334478747130957	1.9550662307358089	2.911177692685431	1.677306013006335	24.0	82.0	1.7356270532098999	0.00970069486247181
1.3930490562196423	0.4594097461142852	1.9503958383228732	2.8084761827042457	1.4154271264846034	57.0	114.0	1.9841898817351762	0.00867149205648486
1.3046022155174288	0.5848734822146981	1.6299263630106537	2.4054127339783817	1.100810518460953	63.0	129.0	2.1851287697917328	0.00874200232830253
1.3080862797146626	1.0612345962097989	2.121132452354429	2.429309731755604	1.1212234520409414	83.0	101.0	2.166659756655623	0.011044283329879511
0.8967429212648987	0.46445217145163575	1.2306507560249635	1.664678007548225	0.7679350862833263	74.0	112.0	2.1677327124158112	0.009965954279219192
1.4189058511492503	0.4145548021282852	1.6835967667335276	2.610130790729869	1.1912249395806187	47.0	95.0	2.191131753545043	0.011912381439064536
1.2428615515426358	0.6080980326344092	2.2176033841513236	2.7578049208460436	1.5149433693034078	43.0	68.0	1.8204013276840314	0.012709655053358864
1.3232369023359851	0.1919421899180811	1.2757265523769281	2.3995723864878253	1.0763354841518402	26.0	119.0	2.229390763214227	0.009719743794134438
1.389440643779203	0.38952453684928234	1.6128304341734598	2.62363672256689	1.2341960787876871	36.0	98.0	2.1257859813847473	0.011102003646814037
1.1462732688765047	0.5294078364863988	1.8986388331070179	2.519735466673831	1.3734621977973263	37.0	72.0	1.8345866895461898	0.012159098301742164
0.7984446392206364	0.35916399150080025	1.4425085594904508	1.8830056540691618	1.0845610148485254	34.0	65.0	1.7361915358281164	0.012245017138398376
1.240444798128738	0.5164474799291529	1.3377086617720162	2.071712802534952	0.831268004406214	65.0	117.0	2.492232097895798	0.011260157527159722
1.0890923081170298	0.7605962363434724	1.8345206337132924	2.225830121360399	1.136737813243369	56.0	78.0	1.9580857568286607	0.012428768602169942
0.8029204771187106	1.1301015244518964	2.392924754591421	1.8866418507063902	1.0837213735876796	68.0	52.0	1.7408919826510643	0.015381282513097498
0.6624577640648923	0.4932620271464554	1.6955512199654565	1.8746216849470931	1.2121639208822008	40.0	53.0	1.5465083992788387	0.01186820130007688
1.1083240417706222	0.04484204377115497	0.8253568007282795	1.8822283782177422	0.77390433644712	9.0	122.0	2.4321202112121165	0.010509955228881783
1.5015071095870784	0.8903308698216632	2.080680823540847	2.7009403581312728	1.1994332485441943	66.0	98.0	2.2518471631577035	0.01195009094369006
1.1628358377136565	0.4502919767251412	1.5625475361756582	2.2664599821217912	1.1036241444081347	46.0	93.0	2.0536520459483754	0.011163352299801236
1.2153541821782177	0.27516907967195214	1.4058862868912487	2.3558479105543455	1.1404937283761278	34.0	115.0	2.065638636968814	0.009100764270093877
1.5059642126962893	0.418591671174944	1.5823028519479962	2.7056322974212685	1.1996680847249792	41.0	123.0	2.2553173930950474	0.009539272192674416
1.0258576509091126	1.1817784625309438	2.4383917856489554	2.225954177033234	1.2000965261241214	82.0	73.0	1.854812615967036	0.012209225269942562
1.38426209551807	0.7266052862458595	1.7045281425628678	2.3415784458692883	0.9573163503512184	71.0	106.0	2.4459818794594015	0.012173714301916216
1.2504951762562393	0.3072224671713968	1.5147732694789675	2.4274389041960744	1.1769437279398351	41.0	110.0	2.0624935980967853	0.009494451284489063
0.935562041232106	0.5169880301302286	1.552002216787442	1.9354858767140588	0.9999238354819528	56.0	83.0	1.9356333032917201	0.011479586345135634
1.2217227835161244	0.8600600990269427	2.029782145905652	2.4124996036682957	1.1907768201521713	50.0	66.0	2.0259880464922038	0.0154337221535824
1.1149212630924048	0.5375205778569014	1.7453955675098793	2.358037681160788	1.2431164180683834	49.0	96.0	1.8968759859392939	0.00962109751289754
0.8116019340509824	0.4113059276362726	1.4364424367965407	1.8347925493877395	1.0231906153367571	45.0	80.0	1.79320697618387	0.010531775213570141
1.3609430925032895	0.47434985198773716	1.7058893893856406	2.5322540700312453	1.1713109775279558	53.0	107.0	2.161897325828493	0.010395308479719341
1.1098196971797127	0.6718699601547518	2.1732122352597636	2.482845584603884	1.3730258874241714	63.0	80.0	1.8083020920033492	0.010682946402146423
1.0037249968004531	0.6389851151301775	1.7454396202138966	2.112629726038959	1.1089047292385057	63.0	90.0	1.9051498928043347	0.010332272334512529
1.443040109046014	0.6463372103864351	2.138030835826801	2.8914442697032574	1.4484041606572433	40.0	71.0	1.996296578153438	0.014046846047828477
1.0257720560130241	0.4057829952328105	1.6699798227282925	2.2863282478338776	1.2605561918208534	35.0	73.0	1.8137456010836872	0.01176674130543663
0.6544136366240763	1.6426215021576491	3.065720599645034	2.062760497009009	1.4083468603849327	80.0	39.0	1.4646679415646302	0.014117272431091428
1.1972626395458859	0.5421462054261335	1.6985967688531034	2.3790500000826595	1.1817873605367737	48.0	91.0	2.0130948083605187	0.011092473832661914
1.4503854422306472	0.3136585210291546	1.1159830342821404	2.29341530918277	0.8430298669521228	42.0	155.0	2.72044372220684	0.009315109572180662
1.5515430788794484	0.2340676874335209	1.2227794788434974	2.5082872516054873	0.9567441727260387	33.0	125.0	2.6216906495062906	0.011123979700334012
1.2093556481403662	1.314952539535634	2.6329765522395547	2.3632181062606223	1.1538624581202561	88.0	82.0	2.048093418439589	0.012613189287930116
0.8707448320500324	0.5752373522727718	1.8050738340010721	2.108231678190857	1.2374868461408248	54.0	74.0	1.7036396667693892	0.010386759816832793
0.905738424714133	0.4394255205110553	1.4463116910346725	1.8713657316107433	0.9656273068966102	45.0	73.0	1.9379792993065288	0.01307607069265015
0.9654647445959561	0.1780901002134474	1.3245106519104333	2.073142483759112	1.107677739163156	22.0	69.0	1.8716115802104671	0.013105522611831283
1.4757464026975153	0.7977142428927659	2.156169413828748	2.773924245215457	1.2981778425179415	66.0	98.0	2.13678292323582	0.011177962769248682
1.5848805194142743	0.46104642260412954	1.8076719893104989	2.9049080255218818	1.3200275061076074	54.0	137.0	2.200642041231129	0.008306018204434286
1.7045634263982976	0.31767879187797554	1.4689071893601757	2.8409097371593632	1.1363463107610656	43.0	150.0	2.5000386856157166	0.008813002795553434
1.042698288695405	0.2926854530272671	1.2428257079701055	2.0162785177938596	0.9735802290984545	36.0	107.0	2.070993696801911	0.00981610432367331
1.6591428004162463	0.682048683509086	1.5917320344647716	2.621338574313321	0.9621957738970748	75.0	154.0	2.7243297522461614	0.009388969723342326
1.0237940610113032	0.6464112746587041	1.49632932527751	1.884374743678883	0.8605806826675796	65.0	92.0	2.1896549407056223	0.012290255858471164
1.0337716382935282	0.5240698163326425	1.5914121317741434	2.052513403288443	1.0187417649949146	67.0	96.0	2.014753369121652	0.010527117143122272
1.219363143990723	0.5834100293331315	2.0246123357739414	2.5815804987687727	1.3622173547780496	46.0	71.0	1.89513111818297	0.012990107991523201
0.6379419494105054	0.3651958796325758	1.7215091506765605	1.965102355125118	1.3271604057146127	29.0	43.0	1.4806818728644968	0.01316887693775053
0.722193197414569	0.25360798617440383	1.30731622225877	1.776710816199147	1.054517618784578	27.0	66.0	1.684856454316011	0.011403419432181847
1.0446085717099143	0.6246839689830874	1.7639767508769364	2.215256364519138	1.1706477928092238	59.0	92.0	1.892333781455436	0.01000181067973015
1.492788289744435	0.25999568181460686	1.1054287559097502	2.2921585636088473	0.7993702738644124	49.0	152.0	2.867455343976975	0.009998493544421914
0.9724869383890375	0.5846499034266504	1.6424213787227016	2.110824171005957	1.1383372326169194	47.0	82.0	1.8543047793959886	0.01086437060208551
1.4234597699613518	0.28292464939716044	1.4674525037618187	2.5775266745414407	1.1540669045800889	33.0	108.0	2.2334291576269423	0.010733893466407416
1.3577318363094382	0.22935308163415224	1.288447039691421	2.4487632724296833	1.0910314361202451	28.0	137.0	2.244447952056809	0.008513581321610866
1.1651455793711123	0.12000093335592332	1.197060055719676	2.2478517994993314	1.0827062201282192	13.0	94.0	2.0761419466428577	0.011211756220172744
0.602854931722058	0.47248983120807275	1.8193982100454715	1.9791232325077852	1.3762683007857273	46.0	60.0	1.438035905773519	0.008734994972210456
0.9720535634487095	0.7540440513035995	2.2093457234605127	2.4914391915085043	1.5193856280597948	50.0	68.0	1.6397675122740167	0.010492518863680063
1.0760508072557908	0.20679064740943431	1.1561895728907168	2.0123560078500766	0.9363052005942858	37.0	130.0	2.1492521953021373	0.008491036768542277
1.7327556464947553	0.5498546179254	1.6665762786565825	2.7458787443452572	1.013123097850502	56.0	102.0	2.710311067007618	0.014102533741604993
1.0501723020295164	0.21970229670563524	1.2061143369113907	2.0258302101536088	0.9756579081240925	34.0	114.0	2.076373484276567	0.009246192714410226
1.3542869401163873	0.47473354962301206	1.5573078521753316	2.4695625442835816	1.1152756041671943	43.0	102.0	2.2143069704529843	0.011243678799015267
0.7482725564261978	0.9433018459057152	1.8814669521665834	1.7933370957270656	1.0450645393008677	82.0	68.0	1.716006072626654	0.01145668615112039
1.1399961045359255	1.116748168179127	2.1704785415105463	2.243064930678287	1.1030688261423613	80.0	83.0	2.0334768579424964	0.012336729786144236
0.6482834469577263	0.5644367202922451	1.3950260324780928	1.492511003186454	0.8442275562287276	75.0	85.0	1.7679013107007444	0.00967103225435814
1.7610052627730042	0.8244256900956366	1.753188493589004	2.7546735730014813	0.9936683102284771	78.0	141.0	2.7722264508647667	0.010432944039986937
0.9444196446521913	1.0827766954650957	2.161701105391442	2.1441437031336936	1.1997240584815023	73.0	65.0	1.7871973875788978	0.01288767664750431
0.9041777216143214	0.7297190468250709	1.9099329312803484	2.0848841867555548	1.1807064651412333	53.0	62.0	1.7657938262463615	0.013230917806760537
1.660961176723087	0.1283220574408871	1.1928557877142738	2.678875739684778	1.017914562961691	21.0	121.0	2.6317294566357403	0.01153728253538501
1.276923633805108	0.892760061508463	2.3245802535777935	2.6475374075168157	1.3706137737117077	70.0	87.0	1.9316436608885952	0.010917574461932358
1.364971770649515	0.8479027032335462	1.9196850099206457	2.4914679781341387	1.1264962074846236	63.0	93.0	2.211696729718592	0.012313479303310929
1.41993270437574	0.7555098581201003	2.0463438947982926	2.7193301900314673	1.2993974856557273	56.0	90.0	2.092762391839773	0.011837872445673686
0.9412042974967696	0.5701826496274347	1.7336187122704212	2.100789560179882	1.1595852626831122	68.0	94.0	1.8116732143688679	0.009120454773316342
1.2792282718754662	0.6497131906266278	1.6348793345486365	2.2802166075883314	1.0009883357128653	71.0	111.0	2.2779652132154458	0.010700411854345447
1.1957428503237653	0.419320271543123	1.6060387140141383	2.383272442437833	1.1875295921140676	35.0	80.0	2.006916255615219	0.012562255216670658
0.9390381687065794	0.40856172043330163	1.6136225667403012	2.1652903212663155	1.226252152559736	35.0	71.0	1.7657790175914367	0.01155358880210475
1.1649875761419417	0.6111092546015542	1.8991779039377052	2.3906443879888744	1.2256568118469326	65.0	95.0	1.950500633522716	0.01014573123105244
1.4848894374296153	1.2484080105798536	2.5576874489945594	2.7924175127528263	1.307528075323211	76.0	85.0	2.1356463126518808	0.012878502824481674
1.1013681220651246	0.5670277023052022	1.4404836325931218	1.9952693850276502	0.8939012629625257	58.0	98.0	2.2320914710591433	0.011820368877443057
0.7130074934394596	0.13195231271124985	0.9808254690258178	1.5615445886438963	0.8485370952044368	19.0	77.0	1.8402785187224793	0.011427586089291768
0.900894675456072	0.07684594608702655	1.1799088171832666	1.9872354117312792	1.086340736275207	11.0	77.0	1.8292929146199712	0.01131540395339197
0.9191468335728961	0.7830776119899512	2.048898746936468	2.2021848052131614	1.2830379716402653	59.0	68.0	1.7163831888761931	0.011461348173298181
1.291602693089052	0.8046386975467608	2.0268021228468456	2.5303408936086846	1.2387382005196326	59.0	82.0	2.042676081634718	0.012566590806487747
0.7509323339035914	0.49585083905402727	1.7056536461024436	1.9790542737250074	1.228121939821416	48.0	70.0	1.61144769876254	0.009833676642366203
1.2329231663120213	1.3067306041934716	2.2896494159229777	2.3425545038713973	1.109631337559376	93.0	95.0	2.1111106225819327	0.01134739134893953
1.130548745847113	0.7077766446968725	1.5856208660175677	2.0398806359141317	0.9093318900670188	67.0	99.0	2.243274054497077	0.011773796779760497
1.2524817860988329	0.7166273217634507	1.8587595721261927	2.447660645386447	1.195178859287614	56.0	95.0	2.047945063925724	0.010886073848412373
1.2722802891211757	0.6098192102737579	1.5462438403203533	2.1768119876392307	0.904531698518055	63.0	104.0	2.4065624136839245	0.012182440767084296
1.179557307600061	0.6409044598566265	1.7082743694559193	2.2831090613180574	1.1035517537179964	51.0	79.0	2.0688735744617257	0.013276525153376965
1.3114671511857203	0.7065079817215942	1.5075920019608662	2.1979903079469016	0.8865231567611812	65.0	117.0	2.4793377264695793	0.011196194902060086
1.246010305811451	0.812883471835717	1.9131884725350061	2.3971302550250266	1.1511199492135757	49.0	71.0	2.0824330745572626	0.014905213110677804
1.1549154587283585	0.33663996151558995	1.3596819279098569	2.2319614467898155	1.077045988061457	35.0	112.0	2.0722991139933185	0.009386002281252805
1.0302008653948151	0.5479888113473558	1.6101996193824701	2.034813227254612	1.0046123618597966	76.0	107.0	2.025471021964778	0.009516424717792321
1.4783948169885035	0.601462115185301	1.752637639245208	2.687865349368761	1.2094705323802575	48.0	104.0	2.2223487694892397	0.011077742761610103
1.4308665409754038	0.2420477919027011	1.3985172540120416	2.6161012593262107	1.185234718350807	23.0	112.0	2.2072431888988038	0.010198621349503613
1.0135352742850705	0.6078299296461815	1.6272947494046717	2.1087778653342277	1.0952425910491572	62.0	100.0	1.9253979735340483	0.009451566770293334
1.2046373079549961	0.6090378528791268	1.4173173771775371	2.0492289601149927	0.8445916521599965	68.0	111.0	2.4262955416078325	0.011520317951379203
1.1691574937822269	1.4808588262153901	2.887806804799517	2.5624987814209623	1.3933412876387354	83.0	69.0	1.839103458825635	0.012739168708547306
1.0774847085244865	0.3029711149098009	1.521979231218862	2.2958831407378617	1.2183984322133752	32.0	91.0	1.884345120640954	0.010044650779295993
1.2871866502749234	0.1941377048513535	1.2014254622944476	2.2517986192977055	0.9646119690227821	26.0	92.0	2.3344087483995577	0.013294099945690807
1.0990772723674047	0.19650840000027547	1.5312372227050504	2.4665708083139513	1.3674935359465465	20.0	108.0	1.8037166125298352	0.007879376760536967
0.7321456355687526	0.34789436236037763	1.331813885190375	1.7612876580133745	1.029142022444622	43.0	88.0	1.711413604343563	0.008808959818089039
1.4162689644117954	0.46994265717223116	1.623976015127711	2.5318372414473704	1.115568277035575	48.0	102.0	2.2695493351382123	0.01159221421288949
1.3445695260441188	0.4025683318862536	1.7813952934944273	2.7351281469464785	1.3905586209023597	35.0	95.0	1.9669276115605987	0.01027309329873056
1.3485819991187022	0.38322159093409924	1.291913300962573	2.2927214373566844	0.9441394382379821	44.0	127.0	2.428371641412966	0.010078655358815428
1.3013686265921685	0.7240058976380912	1.7641746907696267	2.3553378022711744	1.053969175679006	55.0	86.0	2.2347312014640073	0.013489550130387993
1.2234535792592753	0.27238903150193927	1.403543995407743	2.334282772060657	1.1108291928013818	27.0	82.0	2.1013876725492495	0.013065150497764098
0.960791847798453	0.5078916728624672	1.6138492450010913	2.084715510030637	1.123923662232184	42.0	72.0	1.8548550760914306	0.01237925653210175
1.3226850402881936	0.23056061502247238	1.3529749735180177	2.4454062312069307	1.1227211909187371	25.0	103.0	2.178106417681333	0.010903635367095162
1.4371106740332165	0.18300715000026813	1.1696515091966233	2.4312035347638035	0.994092860730587	22.0	123.0	2.445650331878496	0.010489578443413028
1.2694194067529774	0.011538018334350308	1.1321337294872553	2.3864494029032373	1.1170299961502599	2.0	111.0	2.1364237407481568	0.009866647037877315
1.4148096348257901	0.5620873447678036	1.8600589688890874	2.6546897011179356	1.2398800662921454	61.0	111.0	2.141085878617898	0.009894978947343945
1.1733231947499976	0.6387129890798369	1.7321005294899758	2.2837145889011015	1.1103913941511039	70.0	112.0	2.05667533171671	0.009288518454774687
1.1426870033958068	0.7504652790261486	1.744320601295611	2.1393407579915444	0.9966537545957378	64.0	86.0	2.146523552564454	0.012813976775963597
0.6688063723624904	0.5624059248114475	1.6497527442676323	1.8314674313365298	1.1626610589740394	55.0	69.0	1.575237613060389	0.00950100673929304
0.9601505850551821	0.5880922352561835	1.61896807437718	2.0320500383647535	1.0718994533095714	48.0	78.0	1.8957468744765602	0.011830337747994057
0.9007252519956014	0.5633193870265927	1.4515967935390983	1.838815385745795	0.9380901337501936	55.0	85.0	1.9601691986619463	0.011423272833387215
0.9523442735810452	0.13213119515643013	1.400897335696305	2.207139255601245	1.2547949820201996	16.0	77.0	1.7589640437099823	0.010580857037802453
0.8628822400094387	1.1641761296393618	2.377570024492165	2.1190285199135728	1.256146279904134	75.0	59.0	1.6869281498610909	0.01278641571598977
1.4088410818432895	0.641624910431684	1.9244155155759037	2.627154159088455	1.2183130772451654	60.0	97.0	2.1563867351969526	0.011429030310421303
1.114449661861985	0.592491566914838	1.6244333527128962	2.123566491006839	1.009116829144854	56.0	88.0	2.1043812070861927	0.012197682629941024
1.2136476076155294	0.27729334305407694	1.5277596847204664	2.4653655572748505	1.2517179496593211	36.0	122.0	1.9695855267920754	0.008015508733957694
1.5184665297709852	0.36678591141106454	1.333794942664471	2.50800241082604	0.989535881055055	38.0	118.0	2.534523971128746	0.01137046448113991
1.4360675115000054	0.2666242675004269	1.3874098854660946	2.5247000826693893	1.0886325711693838	31.0	102.0	2.3191480298604468	0.011897989306886675
0.915493605474476	0.5408456688755374	1.5194053710154745	1.9498500656265965	1.0343564601521205	49.0	80.0	1.8850852107017695	0.0114328717311967
0.9871496494474672	0.3883940025163184	1.3055667464520602	1.9273832990170676	0.9402336495696004	50.0	110.0	2.049898235294326	0.009414111733337423
0.8945302028647308	1.0021293347741316	2.4469160218348023	2.1590361917047867	1.2645059888400558	61.0	55.0	1.707414761780047	0.014032973773334444
1.2995592353760959	0.2634980396123947	1.3250846387785649	2.3526503809132127	1.0530911455371168	30.0	102.0	2.2340425051368853	0.011369182695645975
1.3569363153632497	0.9069916724264868	2.5263329152379437	2.8676258418423104	1.5106895264790607	56.0	69.0	1.8982231567632821	0.013400718939297023
1.0925405804382406	0.42956759261133626	1.3094135497440929	1.9873103534941308	0.8947697730558902	48.0	95.0	2.221029826149477	0.012118197546607085
0.8349778951140494	0.08994799616016347	1.2024439975097672	1.935236766426446	1.1002588713123966	9.0	54.0	1.7588922178996673	0.015086427397687287
0.9052920088044414	0.9277475882645685	1.7768695578054046	1.819819116863028	0.9145271080585866	81.0	83.0	1.9899017763686087	0.011960207464956794
1.1752570742352162	0.577814692976341	2.0933512731196733	2.6906883402130335	1.5154312659778173	48.0	84.0	1.7755264792408074	0.009860081858240733
1.702612434225096	0.24743667172505623	1.4085399134828738	2.818973604090677	1.1163611698655813	22.0	82.0	2.5251448009698367	0.01629714780009191
1.0324107798743523	0.28164355523299467	1.1153058525233333	1.8348999490136417	0.8024891691392896	39.0	92.0	2.2865105469045335	0.012968995367690004
0.9949118283266691	0.39522047743727595	1.1960225202044867	1.8294422925387719	0.8345304642121028	48.0	102.0	2.192181557165784	0.011101640075524031
0.6406532249628178	0.40531417039875506	1.7035604105559852	2.0139851722518567	1.3733319472890388	28.0	55.0	1.4664955375337108	0.010043139655615957
1.316471282805491	0.7648816001530594	1.9311157216930397	2.5065515967142162	1.1900803139087253	70.0	106.0	2.1062037304706305	0.01013816031332625
1.0921436174948795	0.7445929111433818	1.8089322184434633	2.185492029687562	1.0933484121926826	69.0	95.0	1.9988980688274958	0.010517946375011323
1.2671525508262387	0.6538804342022686	2.0711164051367352	2.6493367838017967	1.382184232975558	42.0	70.0	1.916775434558619	0.013409733196321253
1.0698558131640643	0.25030538871284236	1.4153387329902951	2.249510011273054	1.1796541981089896	22.0	77.0	1.9069232448619822	0.012094113963976227
1.410525252852053	0.6689683512865006	2.0366042634276176	2.6891662097397995	1.2786409568877464	63.0	96.0	2.10314411974204	0.01117237203503705
0.6529981287311997	0.3439107900549365	1.3542032067226377	1.6763121097482687	1.023313981017069	35.0	60.0	1.638120988127404	0.011867365254953393
1.040965604182068	0.5203259928060378	1.6097009362457841	2.1422195400066473	1.1012539358245792	55.0	96.0	1.9452548320770637	0.009999574618562533
1.1867639480900696	0.3362728607475962	1.4516523742795013	2.3205674478631066	1.133803499773037	30.0	86.0	2.046710429388897	0.012015197707920276
1.128949911101735	0.25884857936206007	1.3692398647200057	2.229945999254799	1.1009960881530643	27.0	83.0	2.0253895751760242	0.012267463024320413
0.8400813871290143	0.08379662120479692	1.1555550202742653	1.9131554462390703	1.073074059110056	11.0	83.0	1.7828736329957766	0.010050656034379697
0.9790058686071796	0.8799741145336193	1.9513752492270995	2.095016044933671	1.1160101763264916	70.0	78.0	1.877237402825231	0.011648860392249046
0.7224035353523266	0.5773487440806968	1.6133529967878717	1.7464420108226801	1.0240384754703535	63.0	73.0	1.7054456962864777	0.010549983812435987
1.7571424940365368	0.4944789632796227	1.5989409365390075	2.8796968924055224	1.1225543983689856	52.0	144.0	2.565307210581131	0.009438413940064444
1.3776870743410925	0.44882384595945823	1.7120365310464982	2.589328050830586	1.2116409764894935	42.0	88.0	2.1370423261292193	0.01245017593420654
0.9618081193862387	0.7238867837822285	1.6495654385801855	1.9510543544667465	0.9892462350805078	62.0	81.0	1.972263613728046	0.012096943159693379
1.584354467988708	0.7668119570645993	2.24777723551344	3.0411854775614473	1.4568310095727393	57.0	98.0	2.0875348325083833	0.010834696638054806
0.9481111231149325	0.23862605024140637	1.0271839957276647	1.7469924346698593	0.7988813115549268	34.0	103.0	2.1867984760709294	0.010959420148250642
1.235719892613035	0.2770026785935964	1.120004500916174	2.070008548623808	0.8342886560107726	45.0	136.0	2.4811658815088564	0.009639839644642236
1.6639702953085949	0.44399879592817326	1.350216182428168	2.5693735250332472	0.9054032297246525	52.0	135.0	2.8378223543720233	0.01114655022635856
1.482981060086092	0.294644411619013	1.1298597809907924	2.3285560522161366	0.8455749921300446	33.0	112.0	2.753813764466225	0.01304849103454158
1.0634509407777364	0.4006925459823538	1.4352121428007758	2.113883869648151	1.0504329288704144	39.0	86.0	2.0123929967821184	0.011731535745364466
1.485674082273074	0.1933698918243858	1.7203160257701746	2.946631372192163	1.4609572899190888	19.0	76.0	2.0169182169284046	0.013317797183838728
1.0166266559071047	0.7683848164449156	1.7028316861789254	1.9716571669486562	0.9550305110415517	87.0	107.0	2.0644965204288357	0.009773738195793353
0.8525800563673144	0.6157920521230261	1.4294924882093032	1.7091654615205594	0.856585405153245	59.0	82.0	1.995324052030499	0.012153939846294594
1.2162693047515303	0.47277349445653893	1.4148519904952386	2.1864028967183495	0.9701335919668193	48.0	100.0	2.253713215193078	0.011723039443734823
1.1427221015956472	0.33081097943466165	1.4422225613710506	2.2303248194398826	1.0876027178442353	36.0	89.0	2.050679703946185	0.011641597467416463
1.2444848733722689	0.4471895654564153	1.7910197276999176	2.6044894901072833	1.3600046167350144	39.0	95.0	1.9150593005779086	0.009867253331278086
0.8562003323649912	0.15446423217577965	1.3438273328582866	2.0084000063479803	1.1521996739829892	22.0	72.0	1.7431006549457086	0.011134109443912948
1.160754127937706	0.6156872165447436	1.9190485734098388	2.50552576365004	1.344771635712334	52.0	95.0	1.8631607754894735	0.009450022867340079
1.231745232173103	0.5955820665502307	1.847302531654394	2.435432635374163	1.20368740320106	52.0	84.0	2.0233098966537546	0.012103777436122818
0.9454289885539544	0.8389840601842129	1.982491540844088	2.053781272223087	1.1083522836691326	63.0	66.0	1.853004051585629	0.013482818724474481
1.0205479914772775	0.319350868601598	1.4701805199869566	2.2217647274586727	1.2012167359813952	26.0	82.0	1.8495952153409592	0.01081962891334313
1.3856168184538418	0.4796772741491897	1.8668113664167096	2.7148141683738136	1.3291973499199718	51.0	106.0	2.0424462691994285	0.009719793639378025
1.364448465816155	0.4360123901465991	1.419313963458344	2.465968702902826	1.1015202370866708	41.0	143.0	2.23869577687005	0.008130478946324052
0.9675651919052026	0.32535825542264374	1.5024429449782144	2.1509805205251893	1.1834153286199867	34.0	87.0	1.8176040723027538	0.009908482440068988
1.6481883173750087	0.15242855277682055	1.2435867448695623	2.7363016993357725	1.0881133819607638	18.0	121.0	2.5147211170264248	0.010995028213152066
0.8975990620230356	0.6049128933175263	1.7978318873336252	2.051952268879751	1.1543532068567153	51.0	67.0	1.777577483816399	0.01238675295006175
1.4278949927475717	0.5755322087170796	1.5995142061354328	2.4873952735268223	1.0595002807792506	51.0	110.0	2.347706101311621	0.011193198320880345
1.0759732424223523	0.486526432536283	1.5574094394379843	2.1469694798296617	1.0709962374073094	71.0	134.0	2.004647079832037	0.007487673664910631
0.7620747950991111	1.0659204898961088	2.2442992290354185	2.028788971647467	1.2667141765483558	71.0	54.0	1.6016154308588173	0.012583847760822268
0.707728982821778	0.25279147114330935	1.259573267125731	1.707656965880013	0.9999279830582349	33.0	74.0	1.7077799549695776	0.010434082401605083
1.0941659530807781	0.6545642603835269	2.029692833519116	2.3964033680725993	1.3022374149918212	64.0	90.0	1.8402200247699458	0.009776425239290747
1.9413333739027134	0.7596816137575542	2.041855286025694	3.257789072880732	1.3164556989780185	48.0	104.0	2.4746666943747484	0.01256955986440136
1.0935395074357526	0.47157345977302745	1.7513081591908728	2.367892896032131	1.2743533885963785	39.0	73.0	1.8581132339124697	0.012244361953662275
0.9941924286896562	1.091688128710235	2.2051488810344106	2.2276133363038815	1.2334209076142253	75.0	69.0	1.806044735055365	0.012359907656233805
1.181638823907972	0.8221808923075993	2.0149269177820583	2.3782995333841845	1.1966607094762125	66.0	86.0	1.9874468297911982	0.011522282144896185
1.4356871794201358	0.640625781417612	2.080534757635448	2.824127663906337	1.388440484486201	49.0	86.0	2.034028606527862	0.011910929876341377
1.0677107937329682	0.3873336497017561	1.5193950972673098	2.2541623424507073	1.1864515487177392	45.0	116.0	1.899919423500184	0.007982226159142965
1.0093373560357854	0.4156034767801712	1.2744964410068316	1.8923033262405597	0.8829659702047743	47.0	95.0	2.1431214679787756	0.011575932857849714
0.9727647365707983	0.2190814492790627	1.341139651044858	2.0699688739574444	1.0972041373866461	28.0	82.0	1.8865850058565754	0.011168013495723958
1.347995723052644	0.6287414123367332	1.8896353831328019	2.607883177928022	1.2598874548753778	44.0	77.0	2.069933443528082	0.013630965976248471
1.0165162812233155	0.3594512493932087	1.7645011171213107	2.435738360695355	1.4192220794720396	25.0	63.0	1.716248919690896	0.012369187496105275
0.7534269153564037	0.4755438822742195	1.7050739011912255	1.946382227674877	1.1929553123184733	55.0	72.0	1.631563401894863	0.009809097931468351
0.9763456086889726	0.5195949115600558	1.5888739443190631	2.065146736904207	1.0888011282152343	60.0	98.0	1.8967161985673187	0.009423508445331904
1.5586822344824054	0.9882663696988347	2.2264301885073787	2.774333735831772	1.2156515013493665	63.0	86.0	2.282178513128373	0.013841995864624113
0.7356046049425822	0.35594560259207997	1.5287244542472327	1.9164639666941907	1.1808593617516085	33.0	61.0	1.622940062778886	0.011452618365972748
1.2395386060370641	0.4283986654294196	1.4031266409266814	2.2532545350881232	1.0137159290510591	50.0	126.0	2.222767217634035	0.009145689428933698
1.1125194764483293	0.28057255868129105	1.5516200024964755	2.342852703127126	1.2303332266787967	37.0	96.0	1.9042424054916425	0.009679345228698148
0.706628717077826	0.7652130298352982	1.7448485934640734	1.8245182998287819	1.1178895827509558	67.0	62.0	1.6321095821815608	0.011398998793202733
0.9479652575771385	1.083956042665421	2.2824824441917704	2.2741136205686376	1.3261483629914992	73.0	65.0	1.714825945596869	0.011970186932991608
1.2037414184347182	0.7003899379137628	1.7390134677621052	2.320617081846357	1.116875663411639	58.0	92.0	2.077775671785825	0.011467825013823945
1.3389489552938203	0.4798136087240914	1.9807673774039358	2.7490675517841274	1.4101185964903071	50.0	95.0	1.949529322304079	0.010138166884796362
1.3201549420599683	0.44435424123777045	1.472065674375601	2.3330245261839933	1.012869584124025	56.0	123.0	2.3033809710079285	0.00978661014217046
1.2301879807037237	0.4386343616131334	1.4554147848717014	2.3154158560476916	1.085227875343968	43.0	115.0	2.1335757297183413	0.009506724511815137
1.2834814630138627	0.41450604980785144	1.9163107295389994	2.7424158699489443	1.4589344069350816	34.0	78.0	1.8797389772376338	0.011673491557473754
1.141739122284263	0.4133184461599527	1.3641685206029373	2.1130829252938246	0.9713438030095615	40.0	92.0	2.1754222539401162	0.012187994111097673
1.2143712492428216	0.5930033901636573	2.106772681120724	2.7053810178335866	1.491009768590765	40.0	70.0	1.8144623025445301	0.01227917262211451
1.4124420412121124	0.44808049932254135	1.9605485813531152	2.8804207469246066	1.4679787057124942	42.0	95.0	1.9621679358942563	0.010236300238471246
1.11839565718811	0.3143971859084491	1.3233394655181714	2.1605953791696177	1.0421997219815078	30.0	93.0	2.0731106846408793	0.011309646719029174
1.0637659809480027	0.7347386694630522	1.7573406061150525	2.1809037003855583	1.1171377194375556	70.0	101.0	1.9522245668005695	0.009555633836010716
1.1171324819442392	0.7202340545050296	1.912843386880216	2.337903150357305	1.220770668413066	54.0	78.0	1.915104295056867	0.012018243106593184
1.2167151904550664	0.38016643838176867	1.4853163490196517	2.3092105840248394	1.092495393569773	50.0	123.0	2.1137028106630273	0.008778638586982808
0.6893778722787841	0.05922405069041936	0.8454374926383821	1.4668219541503562	0.7774440818715721	16.0	118.0	1.8867234163249622	0.007761719889620332
1.4673371919715585	1.4032016162949335	2.6142521433132977	2.774765024021864	1.3074278320503054	78.0	84.0	2.1223083645622594	0.01292421774309865
1.1178278613885708	0.42959777278578426	1.6156770523014792	2.287232467841439	1.169404606452868	44.0	89.0	1.955894867542258	0.010874481182278774
1.0621125249611891	0.4575562005626057	1.271963929222467	1.9149646319299543	0.852852106968765	44.0	93.0	2.245365423011247	0.01254785221646303
0.995418187686014	0.3293796803045359	1.3236217967334793	2.019620763742833	1.0242025760568192	33.0	87.0	1.971895805533291	0.011259578414887795
1.07743572987989	1.2377490385846854	2.757717623552282	2.233724960379181	1.156289230499291	85.0	76.0	1.9318046916467848	0.012499332143590695
0.959742492933606	0.7929810679635256	2.079260204074678	2.160496340508885	1.2007538475752788	71.0	75.0	1.7992832959658178	0.011298964744725493
0.87786241324485	0.28575691771275524	1.3936127013031927	2.0042615586379693	1.1263991453931192	29.0	79.0	1.779352875785849	0.010523451263535816
0.8627962590375979	0.514829181758069	1.6785898484333237	2.0300547007397127	1.1672584417021148	41.0	64.0	1.7391647198365554	0.012474915307882199
1.3741954005236097	0.28541599935058226	1.110089682060224	2.238151929161879	0.8639565286382697	32.0	122.0	2.590583964553814	0.011256371673507517
1.0949382986772827	0.23259497573083698	1.5955136024290684	2.496158993745619	1.4012206950683364	16.0	74.0	1.7814174473235878	0.011257103095687412
0.9360492598157641	0.803297719942256	2.1568819672058135	2.2274650837637875	1.2914158239480233	77.0	81.0	1.7248240593445276	0.00970924947292928
1.2826392498754817	0.8329692244381947	1.5984139297546396	2.132435212512684	0.8497959626372023	77.0	113.0	2.5093496630591434	0.01174613730787801
1.1232899677155004	1.1708640132820238	2.6493026420754346	2.338956084394853	1.2156661166793525	68.0	65.0	1.9240119077957178	0.01452488812368762
0.7118250941276223	1.2309037267025476	2.628228206468736	2.1148129570554115	1.4029878629277892	67.0	43.0	1.5073636864129163	0.013768082384604842
1.5473082352690255	0.5022180856569736	1.6768865990513289	2.6704955128833694	1.123187277614344	51.0	105.0	2.37760484480871	0.011900085340472084
1.8634973428205313	0.4795976937012263	2.0168804298516148	3.3307205371622945	1.4672231943417633	32.0	77.0	2.2700844356925174	0.015360337136284352
1.3346571449417548	0.11564693702064965	1.082253288286205	2.303727347836367	0.9690702028946123	15.0	118.0	2.3772553742289615	0.010587261793606159
0.9444889631450368	0.8110499409977505	2.1521506573367626	2.273386673973479	1.3288977108284423	68.0	75.0	1.7107311235837988	0.01032817371447613
1.345049964333811	0.3805864682924799	1.3541513419694098	2.328824505224373	0.983774540890562	39.0	106.0	2.3672339630950443	0.011728323588452928
0.9806798800572814	1.6208579629667659	3.2549414958943874	2.530481224145977	1.5498013440886955	74.0	50.0	1.6327777968433332	0.014146569385606001
0.9350546034415111	0.22997332664598846	1.2048120230229005	1.9211811431215782	0.986126539680067	31.0	103.0	1.9482095510226047	0.009341251099342121
0.9402192303495712	0.380664994047496	1.261731590779937	1.8275799751918307	0.8873607448422595	54.0	108.0	2.0595682035908722	0.009651313912378405
0.7462705744214284	0.29048454726956763	1.3505839652205207	1.8191853417630912	1.0729147673416628	35.0	82.0	1.695554388043746	0.009289720270950876
1.3759851173424167	0.37295248668883274	1.4061503634193548	2.3591156479583364	0.9831305306159198	52.0	116.0	2.3995955516510894	0.010886131570412814
0.9558224147996162	0.29672380691581823	1.4572189941324534	2.059731256433469	1.1039088416338527	36.0	76.0	1.8658526671323155	0.011839935151467819
0.9917359044091605	0.6767811953967604	1.7072218158082448	2.017025513238133	1.0252896088289727	69.0	90.0	1.9672739252101312	0.010846642821324817
0.9567372045319513	0.5835573905840425	1.9854011044062183	2.341289448205701	1.3845522436737498	57.0	83.0	1.6910083811596444	0.009131130243466002
1.0862158404930777	0.6366318559902926	2.0766054290024307	2.555437702298446	1.4692218618053683	46.0	77.0	1.7393136930036859	0.010370365618367022
1.4026365859152494	0.26029402118156164	1.2640757949563506	2.378165398794372	0.9755288128791223	40.0	131.0	2.437821792034604	0.009813684480274315
1.5731920880554657	0.4308211281073996	1.5859648759927703	2.668674371957475	1.095482283902009	55.0	130.0	2.436072596675774	0.00988120867085545
1.0583999264103812	0.4039930255226021	1.5759469727094169	2.230993735361607	1.1725938089512258	38.0	81.0	1.9026142883672734	0.011456581700669894
0.8297170645170933	0.3229925065126882	1.2558660699834234	1.8114751256508834	0.9817580611337902	37.0	97.0	1.8451339462992427	0.009110572696864513
1.2378512123849958	0.4592542420409147	1.7218463033997176	2.4949767338576705	1.2571255214726746	43.0	89.0	1.984667951800788	0.011111209607246392
1.0678860333452256	0.6045237591605976	1.5780232859589545	2.073557259688374	1.0056712263431484	43.0	73.0	2.0618639624684345	0.014300673284969754
1.0304026850769232	0.2756329837452649	1.1845143373016407	1.9552707169128254	0.9248680318359022	30.0	90.0	2.1141077965810218	0.012000543782273106
0.7355126388278423	0.13346005437078334	1.4364687346893041	2.0408757092973837	1.3053630704695414	13.0	59.0	1.5634544560566412	0.010927749045648253
1.2679292879779265	0.5601935113692438	1.6708150139746683	2.3406420777776975	1.072712789799771	59.0	102.0	2.181983938323877	0.011035690999621057
0.6690985461052266	1.0870476216572238	2.152018150705051	1.9037946051768608	1.2346960590716343	71.0	48.0	1.5419135674639801	0.013015039514889864
1.0786116111056658	0.3620500997728482	1.4960273778899487	2.2165996441766938	1.137988033071028	31.0	75.0	1.9478233336029676	0.01282483775716344
1.1836958039002838	0.7411997605652154	1.9314426486772773	2.3964656783287586	1.2127698744284747	49.0	73.0	1.976026721028264	0.013460307617113249
1.1100392740086809	0.8433790229810334	1.841494237016567	2.146891696424826	1.036852422416145	52.0	65.0	2.070585601200594	0.016154443802732683
1.04860077936512	0.5753562327811497	1.5293523254166177	2.0153609596483992	0.9667601802832791	67.0	105.0	2.0846544993794223	0.010093412363214118
1.2355890028822927	0.768631972968278	2.342855056547633	2.8104547321854194	1.5748657293031267	45.0	67.0	1.7845678395891167	0.012471264863718497
1.218547545887884	0.4671945998736311	1.6345716243801691	2.3828906866837842	1.1643431407959002	44.0	90.0	2.046553634571104	0.011479960848511647
0.9595628061558985	0.15077351178074938	1.2058853790694692	2.0084638783333264	1.048901072177428	22.0	99.0	1.9148267950226507	0.009466807066511932
0.8326449817816366	0.3739689458064186	1.5338746623138937	1.9902789861248902	1.1576340043432536	52.0	96.0	1.7192644468438978	0.008143661130176056
0.8818071163680392	0.5664734200348382	1.7136404164576646	1.9969715380618658	1.1151644216938266	67.0	88.0	1.7907417948544841	0.009551787859812826
0.8862121116192092	0.6016564735819128	1.8762786684129367	2.21905731611952	1.332845204500311	40.0	61.0	1.6649025022762893	0.012056355650054315
1.638516842486345	0.5265645240895115	1.5101173119664986	2.6387494725268854	1.0002326300405404	50.0	123.0	2.6381357628974116	0.011378201707397135
1.277883142015648	1.05211650564923	1.9276769963460063	2.2381602189867422	0.9602770769710942	77.0	93.0	2.330744191089458	0.013126781412350262
0.48896767185309375	0.7379878559561761	1.9300172172043875	1.8565496675494961	1.3675819956964024	49.0	34.0	1.3575417586600362	0.012970487550869627
1.2523104087494297	0.4777680589551503	1.8636984173528215	2.5887553271108983	1.3364449183614686	46.0	88.0	1.937046032757421	0.01083929817211346
0.9069832949654467	0.2876140101283111	1.1091409718953038	1.7488706521434403	0.8418873571779936	36.0	95.0	2.0773214340759965	0.011102362828365983
1.1676275122834745	0.13204630019385233	1.2079387470162726	2.213845925118792	1.0462184128353174	12.0	58.0	2.1160456535257595	0.018644323341804665
1.2513840806429244	0.9643144818081116	2.0532222056366414	2.2653596292597995	1.013975548616875	58.0	66.0	2.2341363481100593	0.01757147326350482
1.219950343133087	0.6982390480504068	2.0521850503819	2.5719245147801977	1.3519741716471108	50.0	75.0	1.9023473737274292	0.012370409469783038
0.9202705579331165	0.8649741953062595	2.108508822297481	2.181968805833327	1.2616982479002106	57.0	60.0	1.7293903748100488	0.013171059414882922
1.4721531681173228	0.31831424465186675	1.5038230258564136	2.5695950266047767	1.097441858487454	36.0	89.0	2.3414406938571797	0.013790971871972365
1.631799643813963	0.517548331323844	1.8570109967269326	2.924178334416697	1.292378690602734	45.0	99.0	2.2626327373541972	0.011899014448344063
0.6122019264768368	0.7230537142492972	1.8624100137801896	1.7586414402239192	1.1464395137470824	57.0	49.0	1.5340028140480646	0.012597982232489719
0.9108549985702119	0.5833179904426786	1.7894504388627432	2.0997394057787857	1.1888844072085738	49.0	67.0	1.7661426065035561	0.012247788620063009
1.267383047745802	0.87150579528541	2.1473366943358956	2.5348228830625565	1.2674398353167546	62.0	82.0	1.999955195055915	0.01219472780125185
0.5928067593908576	0.19508603712979822	1.035808975957045	1.4646810597434337	0.8718743003525761	23.0	70.0	1.6799222768134503	0.010691349812900531
0.7420151626598581	0.504599289718318	1.9386172547179197	2.173954511369664	1.431939348709806	61.0	82.0	1.5181889605369268	0.00734574836777529
1.4413503326472417	0.4312913581710196	1.684138839185576	2.6908533977492013	1.2495030651019596	44.0	115.0	2.153538853087669	0.00962355958441888
1.3090729479581338	0.5645418625708158	1.6337163456340715	2.3927182926483463	1.0836453446902126	54.0	103.0	2.2080271044142816	0.011094736717305006
1.0760171387369046	0.49782455904923273	2.007901983757299	2.5442689179995472	1.4682517792626426	45.0	81.0	1.7328560087134928	0.009791997272264414
0.754971933369105	0.4377356539936015	1.1713502637085047	1.5152706297803002	0.7602986964111953	50.0	79.0	1.992993854826749	0.012594142554371062
0.9333456872457724	0.4501884318677658	1.865228278702179	2.3013254079816265	1.3679797207358542	46.0	75.0	1.6822803533547366	0.010005575358684654
1.206690890092588	0.7329067702075118	1.8437731994263675	2.3599158843481747	1.1532249942555868	68.0	103.0	2.04636206820293	0.010029722596910318
1.3021404274471065	0.44639612321567146	1.8211901995385142	2.674045433064946	1.3719050056178397	47.0	107.0	1.9491476611827692	0.008998536342902385
0.7006369382072664	0.8908930725864261	2.264753720471863	1.903288478969394	1.2026515407621277	65.0	53.0	1.5825768433001537	0.012495765143025169
0.943984372173367	0.9524142352006661	1.8515016564218132	1.966325459297811	1.022341087124444	55.0	60.0	1.923355604173679	0.015727092057359646
1.1959811021394389	0.41047224299297524	1.5093890528890117	2.3093936077025403	1.1134125055631015	41.0	101.0	2.074158136507169	0.010421048428573316
1.2307432859311005	0.34710778301387224	1.5730380577075644	2.4282911245573646	1.1975478386262641	34.0	91.0	2.0277195166941437	0.011207231934717826
1.7909228316930415	0.032864676272841065	1.0596607687623698	2.808834004111883	1.0179111724188414	5.0	124.0	2.759409740475987	0.011809352388293845
0.9513448320139517	0.09877620437071921	1.5557074328365357	2.4167654380975487	1.465420606083597	9.0	76.0	1.64919575176199	0.009496876974209515
1.0884744228223753	0.6483353246103443	1.7797843870941497	2.203156708731736	1.1146822859093606	71.0	106.0	1.9764884905606939	0.009273014661467982
1.177795754903908	0.7107272655073367	1.887450975049669	2.32045816183488	1.142662406930972	59.0	85.0	2.0307469185647746	0.012023652414717352
1.3368430574694514	0.27625245584315206	1.1753679029691206	2.227117198119261	0.8902741406498095	39.0	121.0	2.5016083208860724	0.010932693579312829
0.8711886778035878	0.3896664093837292	1.5376438624455737	2.0651647275243783	1.1939760497207905	34.0	76.0	1.729653394644988	0.01040109164569271
1.2296125719933717	1.2103803818088767	2.5961485538780154	2.7012100075498453	1.4715974355564736	85.0	85.0	1.8355631385891908	0.010308502826367747
1.2584762745038414	0.7525833092658221	1.5771289246743967	2.0129892927458317	0.7545130182419902	90.0	119.0	2.6679318236762595	0.011896821851829819
1.0570265307241806	0.5438081367902672	1.9422622751288916	2.4206575225944764	1.3636309918702958	43.0	70.0	1.7751558427653584	0.01182779551236224
1.3901329700159677	0.4075126247262981	1.4831512105390567	2.4821986987836526	1.092065728767685	48.0	127.0	2.272938920612983	0.009327235558727134
1.015797184222023	0.47634735348843615	1.539942654147305	2.1170711423027186	1.1012739580806956	47.0	94.0	1.9223837327383626	0.010030812186263205
1.0548009626779231	0.6170138138137173	1.7312735064763591	2.217497133043162	1.162696170365239	55.0	92.0	1.9072025775629564	0.010124544464133094
1.3614495595417035	0.7059329433583834	1.8763021979498014	2.573496880014136	1.2120473204724322	45.0	76.0	2.1232643615028475	0.014293210634371726
1.0346567804069011	0.8566899982319898	1.8431634755715602	2.1170879692130673	1.0824311888061662	61.0	77.0	1.9558637917187545	0.012568907832266581
0.7966564572789605	0.8472844774272981	1.716869553249514	1.781156094291041	0.9844996370120804	57.0	60.0	1.8091993407908031	0.014255856256904273
0.7988056631968794	0.4763699343990704	1.6667003670692233	2.025293251012421	1.2264875878155417	43.0	72.0	1.6512953503423602	0.010049974770345735
1.6244401897095244	0.2837302425892836	1.4652041970107228	2.8015877342673305	1.1771475445578061	25.0	101.0	2.379980102935816	0.012385638736555637
1.0395398530128852	0.18642486399557767	1.2885135210039775	2.120348109558685	1.0808082565458	25.0	92.0	1.9618170907901775	0.010567288464655053
0.7183343351157252	0.14234420984885232	1.1466698053910456	1.7051959442835032	0.986861609167778	15.0	49.0	1.7278977401111972	0.0161024048757852
0.7999774532481867	0.19977891717736318	1.2373915558830784	1.8372502083893663	1.0372727551411796	20.0	63.0	1.7712315292994507	0.013091314421507837
1.3039617270126556	0.07803048969367943	1.249558214888206	2.4775804598793427	1.1736187328666872	11.0	131.0	2.1110607648768456	0.008228764167081824
0.8754283880619165	0.6315621173550188	1.7722522771170957	2.0507040527855267	1.1752756647236102	59.0	80.0	1.7448706838219024	0.0100390014889466
1.3647411117562784	0.38725560986583196	1.4345103709916198	2.368498720180351	1.0037576084240727	50.0	111.0	2.359632146548767	0.011158215937208995
1.1210526455552299	0.7587753893251963	2.2757064887904	2.599157189121615	1.4781045435663853	47.0	62.0	1.7584393474972635	0.01313379958137742
0.6665306082413797	0.1614715547804142	0.9460412364792995	1.465896409930032	0.7993658016886523	20.0	71.0	1.8338242727338852	0.012321907020759566
1.3842593356320996	0.24072048190475104	1.3931353897175984	2.5571423773743476	1.172883041742248	20.0	91.0	2.18021941350253	0.012356849809194024
0.8019694828603985	1.3586315148151655	2.4642253479748315	1.9469023857504872	1.1449329028900888	85.0	57.0	1.7004510751992825	0.013437149086161872
1.309648574442734	0.5271867593189634	1.8255698036351686	2.557073195447908	1.247424621005174	50.0	94.0	2.0498819346594424	0.011016391685321777
1.2743979659872222	0.6036306016213011	1.8929865661372622	2.553861157387972	1.2794631914007497	45.0	78.0	1.9960411323689726	0.012783864750789749
0.9190637595209254	0.1933692880461062	1.3847836188698832	2.122098836760798	1.2030350772398724	20.0	80.0	1.7639542494717084	0.010235164289280868
1.0909712841926662	0.2971865354295158	1.4246899713124013	2.242069099999209	1.1510978158065426	27.0	84.0	1.9477659232879811	0.011450241774297711
0.8436214068474157	0.4076740290178913	1.3522674210399932	1.8128455880102388	0.969224181162823	36.0	66.0	1.8704089551658565	0.013687177914407898
1.3406492353865123	0.7218085831896397	1.6884603880175215	2.341130515516791	1.000481280130279	64.0	103.0	2.340004317933803	0.011907875650187734
1.0387321122752615	0.7350242145755879	2.0146546806156747	2.336636714497061	1.2979046022217995	53.0	69.0	1.800314684528526	0.012293465265117627
1.2809738627958378	0.905324729098536	2.2788911083422665	2.660291937062848	1.3793180742670104	59.0	77.0	1.928700846232705	0.012306875189134741
0.9929570371678194	0.33577912166239887	1.4196298154251614	2.08545219587198	1.0924951587041607	33.0	81.0	1.9088891875233513	0.011515226612624446
1.408186891930906	0.7189104779323181	2.5041082062322824	3.062029502401286	1.6538426104703798	48.0	70.0	1.8514636658988939	0.012695231965395562
0.7274860162078496	0.4219689804965103	1.3991127558241498	1.727954861867089	1.0004688456592394	44.0	72.0	1.7271450973853033	0.010949851232034107
1.1403597242471204	0.28457165948281804	1.2443946071541043	2.100334010904672	0.9599742866575516	30.0	86.0	2.187906530515142	0.013134315187421938
0.8059827751491357	0.41528996081470027	1.4800429255750276	1.9030715348996368	1.097088759750501	37.0	70.0	1.7346559409946298	0.011352136299055453
0.7464022923328819	0.19094951680900507	1.0777567458713941	1.6617103577701722	0.9153080654372903	23.0	87.0	1.8154656563375597	0.009888961362504996
0.7359254640429691	0.28769274942029277	1.5295251334815596	1.9836171680687267	1.2476917040257576	28.0	61.0	1.5898295722160036	0.010965116699280502
1.1085978595931811	0.46777482764141165	1.3453442978357362	1.9464595236290838	0.8378616640359027	70.0	118.0	2.3231275605249286	0.01030566417974636
0.9403568897177734	0.7064746134985798	1.848497581649509	2.0948771186491655	1.154520228931392	67.0	84.0	1.8145001414034596	0.010233002014833922
1.4124453276728004	0.4296421783804918	1.2563464011509906	2.2485992331883717	0.8361539055155712	49.0	117.0	2.6892169232910406	0.012198172082195004
1.2242877547551607	0.3870807961826437	1.6444950334112869	2.4231163572727574	1.1988286025175967	46.0	98.0	2.02123669070299	0.01035957422421953
0.8468045351340874	0.2641115966341996	1.3227280294211408	1.9018422012311322	1.0550376660970449	32.0	82.0	1.8026296712862537	0.01036711027759879
1.2473044787757275	0.36126944910104064	1.1953927138104194	2.122148447795069	0.8748439690193417	47.0	130.0	2.425745073345932	0.009834061096669846
1.109203459848229	0.3926787265488403	1.4167320215295427	2.1253699745588124	1.0161665147105834	44.0	94.0	2.0915567909302184	0.011325289055804905
0.7475044915231972	0.40443489535375843	1.6377921650939389	1.9997799620356949	1.2522754705124977	34.0	62.0	1.5969169796301117	0.010891763096846236
1.1551544047654745	0.41354334467750953	1.5767851911414958	2.281360024506012	1.1262056197405377	49.0	105.0	2.025704706598433	0.009699275078409985
1.0588010422120142	0.512287235523642	1.5073050180877947	2.0540744795849	0.9952734373728859	42.0	74.0	2.063829298013635	0.014125995250349873
0.7701423163718035	0.3792465373481708	1.305582718532585	1.7002541488374208	0.9301118324656172	54.0	95.0	1.8280104493781641	0.00916078228669139
0.8211494218351014	0.3982800574051044	1.6019524689205844	2.0096153498900615	1.18846592805496	43.0	73.0	1.6909322366346609	0.010381080075854506
1.0824100514890185	0.6605743081515714	1.9955825237459592	2.4077475755230147	1.3253375240339962	43.0	66.0	1.8167052029089412	0.013050368669268037
1.133856471955069	0.7988835072930685	2.222948525964198	2.4918071055352193	1.3579506335801503	68.0	83.0	1.8349762089404742	0.01055134166484735
1.3763806301993746	0.5087987982652584	1.939697409025289	2.694590001535521	1.3182093713361462	57.0	102.0	2.0441289981152733	0.010112610223399083
1.8541835068040884	0.7443012220376899	1.8775129731362432	2.9513519186436956	1.0971684118396072	80.0	149.0	2.6899716459164225	0.009581147422150032
1.4365022314198514	0.7856948969073076	2.016938338716791	2.6241157478194963	1.1876135163996449	68.0	107.0	2.2095704634406106	0.010689401304010538
1.2600812304052738	0.5389971926848769	1.7785305514363683	2.501373853530026	1.241292623124752	51.0	102.0	2.0151363239662414	0.009910563140880601
1.2777069880429597	0.09040278653785339	1.450097714960277	2.601710312329323	1.3240033242863634	11.0	76.0	1.9650330664627618	0.012823073546613745
0.8993516492122066	0.3286422516712404	1.3027371411307902	1.8777342648155868	0.9783826156033802	42.0	88.0	1.9192228427500888	0.010687752658212297
0.8003304588684561	0.708624549156254	1.730900164211983	1.8783746783079656	1.0780442194395095	60.0	70.0	1.7423911231438718	0.011443835845340094
1.03458281275738	0.7095992801466531	2.0999200701219567	2.3678966421296668	1.3333138293722868	48.0	60.0	1.7759484601194402	0.013809828562958815
0.8925244467182367	0.6604156794096601	1.723385883329154	1.9814525146865412	1.0889280679683044	57.0	73.0	1.819635817068695	0.011830818322209462
1.2510297480300065	0.3251483552925549	1.7404361130074626	2.6608317966353674	1.4098020486053608	42.0	121.0	1.887379720626439	0.007573427330266686
0.8681317016432433	0.4151537803985439	1.2404685406816436	1.721831243122832	0.8536995414795887	53.0	97.0	2.0169054327224325	0.010434468468472251
1.3989574925066721	0.3876975773291831	1.2018077523779689	2.2067454488480145	0.8077879563413424	60.0	150.0	2.731837521870062	0.009665811205243484
1.0861884144889675	0.19713196624244556	1.2782497624358036	2.1709658552133213	1.0847774407243538	31.0	133.0	2.001300703454592	0.007525849280035871
1.17154547706474	0.3346654742089801	1.448900428051898	2.2738225776122554	1.1022771005475154	37.0	95.0	2.062841164424824	0.010996134107545926
0.7744858596430224	0.7744858596430229	1.9102279749463424	1.9011086665413783	1.126622806898356	69.0	68.0	1.6874402461061635	0.011100535527043391
0.8160600642566544	0.7250981383477355	1.8848011195029284	2.0125066650220265	1.196446600765372	62.0	70.0	1.6820697753954228	0.010717679321696686
0.8164354043499571	0.7409404854302042	1.7078051340761569	1.8352056684456006	1.0187702640956435	62.0	70.0	1.8013930452462725	0.012130185666552912
1.251977657840749	0.46713288652171936	1.2648798420512475	2.044314652986225	0.7923369951454758	59.0	119.0	2.5801075369589195	0.011491018465172897
1.513532138348276	0.45672197439980744	1.6904409692885825	2.7357170949241363	1.2221849565758602	42.0	101.0	2.2383822351967657	0.011509469483041572
0.9962947493984216	0.630355460814475	1.7076156249654495	2.0674571013849827	1.0711623519865612	56.0	81.0	1.930106204302932	0.011712101655905935
1.051119038509476	0.6163496115483622	1.9658737864796283	2.3483763763444054	1.2972573378349295	63.0	87.0	1.81026254996079	0.009841367271133857
1.253541801482116	0.47831999381425416	1.5221641254591107	2.304870721303752	1.051328919821636	51.0	107.0	2.192340263687207	0.010583847945406205
0.7076484428988141	0.42234705696927977	1.286150360131555	1.5881340367891377	0.8804855938903235	54.0	81.0	1.8037024657861254	0.01050569598618505
1.038558847960578	0.3218923757005798	1.3345991445227199	2.074262839056557	1.035703991095979	32.0	90.0	2.002756440922447	0.011133188698763638
0.7641867894065748	0.727143414320568	1.9135813669733313	1.956461014532284	1.1922742251257092	62.0	64.0	1.6409488465843516	0.011164535411202983
1.0024785480717235	0.6433621381808861	1.6871328631953273	2.079847609461333	1.0773690613896094	59.0	85.0	1.9304875961248684	0.011164297466188081
0.8724347914527573	0.5153217403888504	1.33894165951416	1.7150619867611894	0.8426271953084321	57.0	87.0	2.03537459544421	0.011784992369432229
1.0579039084604591	0.767403588344906	2.0581094806098594	2.3230170660189455	1.2651131575584864	53.0	66.0	1.8362128732437533	0.013283838196002363
0.6061895542192632	0.40357921393913365	1.41990682306142	1.651734172966371	1.0455446187471078	49.0	70.0	1.5797835341983486	0.009424669862048074
0.9742724299418335	0.8222397727087454	1.9873487516337778	2.0830151132696337	1.1087426833278002	59.0	63.0	1.8787182495920827	0.014440455916636542
0.7849979268910381	0.6051121499706618	1.774287543327503	2.019505480410131	1.2345075535190928	44.0	59.0	1.6358794036158948	0.012035023682891072
1.1962993656567893	0.3640156019074433	1.2603500178417468	2.0578819245032194	0.8615825588464301	55.0	116.0	2.3884906946799274	0.010828441864008756
1.316125610340501	0.30031345086536443	1.6147446488551782	2.6069243387512286	1.2907987284107276	24.0	77.0	2.019621093027382	0.013169930521586085
0.8562451094782904	1.1065427834910406	2.2343281324034434	2.057403308419679	1.2011581989413886	92.0	75.0	1.7128495732143534	0.010351979411393058
0.868320792061372	0.6694643713168762	1.6955412773887832	1.8919319235684335	1.0236111315070615	75.0	90.0	1.8482916659795838	0.009846582625910046
1.0936636570018679	0.8230412594901628	1.7298558591882383	2.067061665350818	0.9733980083489501	71.0	94.0	2.12355238825371	0.01155829468678667
1.0299793415909213	0.3368062964149092	1.8913347659051536	2.5379592300608325	1.5079798884699112	35.0	73.0	1.6830192825953412	0.010288379533264334
0.7152159785034252	0.30211484195810323	1.1233253247992945	1.5786252469262652	0.8634092684228399	40.0	90.0	1.8283626371186468	0.009672802696146027
1.2531766387656973	0.5111768601616646	1.7028585826995872	2.3834894354586176	1.1303127966929203	47.0	83.0	2.108698974684046	0.01296811035267873
0.5199283324549433	0.7207490319426642	1.8883064609516564	1.693398524231655	1.1734701917767116	48.0	36.0	1.4430690579943384	0.014698342821580227
1.11139659816218	0.6197786996144059	1.8137773946307199	2.355409281336217	1.2440126831740368	49.0	84.0	1.893396516928193	0.010964006824664725
1.3247818304486294	0.2842967597686703	1.6354719526508754	2.598987008006575	1.2742051775579457	40.0	104.0	2.039692707094171	0.00988799824253623
0.9636269912532431	0.3972433154034971	1.5472769096352204	2.1345183552830806	1.1708913640298375	45.0	99.0	1.8229858216194745	0.008750538795699954
0.8509476574881985	0.6062954767093192	1.8143982617169974	2.074590569156399	1.2236429116682006	53.0	69.0	1.6954215558917396	0.011038319347838974
1.130182232493894	0.18549097938903203	1.3910171060195722	2.3271708180337503	1.1969885855398563	19.0	81.0	1.9441879781870837	0.011841576739533228
1.8091215465701587	0.4508146630229921	1.7287038951206402	3.0870616712581276	1.277940124687969	43.0	133.0	2.415654389138057	0.009567023016115665
1.0981868132325114	0.94049498504683	2.1460866946179467	2.326568675135993	1.2283818619034814	74.0	84.0	1.8940109320165133	0.010969579260745859
0.8104851050275903	0.7935958447778817	2.055493421300917	2.1495225308932535	1.3390374258656632	60.0	60.0	1.6052744227844316	0.011380332469270336
1.532258825730334	0.8365552650686501	2.244116458223733	2.9298328247660033	1.3975739990356693	61.0	98.0	2.0963704439175297	0.010896874225693352
0.9727271103933364	0.42201950061144566	1.479516061698303	1.9932569161032132	1.0205298057098768	47.0	85.0	1.953158942493317	0.011362463016489712
1.3842003633481035	0.2985291112214825	1.32329549277067	2.393878455152105	1.0096780918040014	39.0	121.0	2.3709323541673957	0.010293012408359243
0.6608025985166945	0.332924061446344	1.600323542974614	1.9360859858685644	1.2752833873518699	28.0	52.0	1.5181613789299437	0.011583176073918563
0.9738856578348487	0.5109933119072365	1.5690412882301226	2.127271817462093	1.1533861596272443	32.0	66.0	1.844370855073892	0.013380738991461258
0.6588837114872903	0.17034276997839792	0.9827432458153668	1.4899750770331552	0.8310913655458649	22.0	73.0	1.7927933543799148	0.0115371124125136
0.9662713885233325	0.21061415156445684	1.1820402060999022	1.957938769654725	0.9916673811313925	22.0	85.0	1.9743906141401104	0.011545969898015035
0.5876268453067544	0.15658948400966022	1.1986289484626567	1.6277484196882428	1.0401215743814884	20.0	60.0	1.5649597698770823	0.01076875950912964
1.086760554216512	0.4626477193168632	1.6725245390020007	2.303071460451413	1.2163109062349011	53.0	102.0	1.8934891142105983	0.009029873795103768
1.1136003569768467	0.6727194698173657	1.706881632365203	2.1508821199881765	1.0372817630113298	68.0	98.0	2.0735755671091303	0.010735924736678287
0.9957600763104719	0.7388492978123382	1.6374966781341593	1.908603524719996	0.912843448409524	77.0	97.0	2.090833349404453	0.010969877072190909
1.2376074468219382	0.4546570955609808	1.8259913936062262	2.5449785821541813	1.307371135332243	52.0	102.0	1.9466381912336044	0.00942141926263053
1.2627563196576421	0.43227333241559074	1.5384255269410672	2.451567892131382	1.1888115724737398	40.0	119.0	2.062200561380837	0.008774660926727044
1.048158216766963	0.5192118409072892	1.571652775757299	2.109707388245138	1.061549171478175	51.0	92.0	1.9873854597874485	0.010770344728906785
1.261299719661249	0.259034214699716	1.3331485457954821	2.309493917424095	1.0481941977628462	32.0	98.0	2.2033072901502724	0.01162929304487443
1.4110473137061752	0.3138631977352577	1.7261229081468799	2.832880822684346	1.4218335089781706	25.0	89.0	1.9924138830574143	0.011174352458398335
0.5451783764609677	0.240512168987699	1.4398513684110097	1.726684244042936	1.1815058675819683	30.0	56.0	1.4614267194260424	0.009774598029454839
1.6040863172433508	0.2874833338341617	1.2600346449194897	2.507129868454479	0.903043551211128	48.0	133.0	2.7763111370343223	0.011076460583839978
1.3846686205779544	0.29560886166283606	1.5166228364164678	2.6054679423188465	1.2207993217408921	27.0	93.0	2.134231151605966	0.011760391808740535
1.519099273999088	0.53750189354194	1.7381813992702226	2.7298260482705325	1.2107267742714445	52.0	119.0	2.254700322385459	0.00985660247204118
0.970619228686799	0.28920778668313196	1.3817421632771345	2.0576703702126062	1.0870511415258073	24.0	60.0	1.8928919639644717	0.015343201202687656
0.772264888833218	0.4149707824273283	1.6895086955499603	2.078877573829494	1.306612684996276	34.0	61.0	1.591043465061277	0.010983168009820963
0.8051086962253887	0.6197086894220045	1.5057785450965575	1.7245285098963536	0.9194198136709649	73.0	91.0	1.8756703784866604	0.009971497996366345
1.0803666615804894	0.445861871582391	1.495984157411395	2.1024753362648747	1.0221086746843853	58.0	102.0	2.0569978401896387	0.010201375284902546
1.4395479262696471	0.3032055785805494	1.6635577224699416	2.8246229340751943	1.3850750078055472	31.0	124.0	2.0393284971262347	0.008291082136052246
1.3354538251797485	0.5526225528473763	1.746579362336949	2.5302849027590604	1.1948310775793118	48.0	97.0	2.11769257616343	0.011159723397709896
0.9177702613841028	0.5341333024897077	1.7521374752916796	2.1400805494862833	1.2223102881021806	43.0	65.0	1.7508488395439086	0.012431608204804077
0.7079394060931659	0.35972767603117894	1.458545824574373	1.8293842621321683	1.1214448560390025	31.0	61.0	1.6312743799045475	0.011573761694608801
1.1706146321712043	0.6332810609443391	2.4092085039979114	2.8552311979030494	1.684616565731845	38.0	56.0	1.6948849108952317	0.013592630575537732
1.1906030134571188	0.23252671788418966	1.429254648631695	2.3907915118601077	1.200188498402989	22.0	86.0	1.992013350437348	0.01156078274830691
1.5901242442566756	0.4432444398869171	1.8057772812600001	2.9643503654513657	1.37422612119469	28.0	80.0	2.157105238892049	0.013863707038890652
0.9044819045077431	0.38295530298528047	1.367155620136101	1.8728308751618437	0.9683489706541005	40.0	75.0	1.934045402967469	0.012688288845493823
1.5095355826406696	0.31657314606996667	1.2149504970809704	2.3884724639387738	0.8789368812981041	38.0	114.0	2.7174561845797536	0.012651375209411996
0.8530569966223454	0.23686777288740557	1.2366185071363864	1.8575333826347982	1.0044763860124528	27.0	75.0	1.8492554016215268	0.011825926531496228
1.0870837699209028	0.45794188606504893	1.278948908751886	1.9130160563583514	0.8259322864374486	59.0	107.0	2.316189944105342	0.011324799714654367
1.065911169268212	0.36711177125853234	1.5805664305451077	2.2505455134015655	1.1846343441333536	40.0	85.0	1.8997807420888204	0.010892152041502552
0.742385902761534	0.51821875717451	1.5252788236704824	1.8522933246747622	1.109907421913228	43.0	71.0	1.668871914994342	0.010406665252041678
0.8756111338523147	0.6546598858377306	1.8447203113025477	2.0177961463479064	1.1421850124955917	63.0	74.0	1.7666105965960521	0.01109437932832808
0.8886599611769765	0.7466038344078902	1.7202273525267724	1.8666175494991017	0.9779575883221252	68.0	77.0	1.9086896730375027	0.01211146180818658
1.3479933535882833	0.8264740095055152	1.8065244649720127	2.400762704127269	1.052769350538986	57.0	87.0	2.280426099884226	0.01367015423655927
1.3068203212733005	0.3729414990413691	1.6339430313211953	2.5211971050570376	1.2143767837837371	42.0	97.0	2.076124262851542	0.010864874188799816
1.0560463263949993	0.32580029161770285	1.2624342958173087	2.0220644170070545	0.9660180906120553	32.0	90.0	2.0931951861542295	0.011841187180191986
0.975717537233967	0.4960158773040537	1.693227350616887	2.100476303730983	1.124758766497016	60.0	86.0	1.8674904933373158	0.010477917428346455
1.4160071780340817	0.8937275869467305	2.0559656979289045	2.635088532961532	1.2190813549274502	69.0	110.0	2.161536243918972	0.010109609336963699
0.9475597223461849	0.6078225461006606	1.5529213388789673	1.9045939971874917	0.9570342748413068	64.0	88.0	1.9901000907238218	0.011282283999484556
1.1745032605737225	0.28499298944291473	1.0873781906807691	1.9895081315438332	0.8150048709701108	42.0	126.0	2.441099682233428	0.010218501656597847
1.4806511890686507	0.4084521713926066	1.9577951312403106	3.0000043547223845	1.5193531656537338	32.0	86.0	1.9745273334337439	0.011412876037230723
1.3891306950598663	0.2894351104337902	1.4599658828580748	2.599084354361987	1.2099536593021205	25.0	106.0	2.1480858662480444	0.010406147772358564
0.8915423713211512	0.2131296470053513	1.054711427191365	1.748348147988697	0.8568057766675459	28.0	95.0	2.040541970653734	0.010831077734829952
1.3673585126564864	0.16340371872145543	1.0118648279325475	2.211300821499998	0.8439423088435113	28.0	147.0	2.620203772613597	0.009453598735851134
0.6356096501370672	0.29394487403551306	1.376408785233848	1.6912856341302978	1.0556759839932306	43.0	71.0	1.6020878183974516	0.009576806073254673
1.2358211172575662	0.3449526990300147	1.4383737353671937	2.355748464545399	1.119927347287833	29.0	86.0	2.1034832931353957	0.012474190227699224
1.0797759380280152	0.3308522491812702	1.525026178834551	2.2410800459659734	1.1613041079379582	42.0	95.0	1.9297960203940838	0.00998366697433377
1.001293998697007	0.3020914255933993	1.4560501484366941	2.1411717255236504	1.1398777268266433	33.0	78.0	1.878422286120595	0.01166053115633851
1.1994420414074969	0.49683144409770064	1.505793946927588	2.1875749142501744	0.9881328728426776	47.0	88.0	2.2138469171225132	0.013029039388954349
1.1966547814931492	0.28091945874525814	1.3908748746682835	2.2756924530684093	1.07903767157526	35.0	100.0	2.109001856947388	0.010765603654054821
1.2749467873176725	0.17566137997214337	1.3948451371382413	2.4522591364264854	1.1773123491088129	17.0	69.0	2.0829299363781972	0.01534223640850928
1.2951881878164662	1.0288709310928519	2.588046589636775	2.79100639939449	1.4958182115780236	71.0	80.0	1.8658727228959853	0.011248132234194583
0.7636288244050924	0.6956528685190666	1.9649271393044034	2.048369492405253	1.2847406680001607	58.0	63.0	1.5943836319852505	0.01068252070782294
1.4936981766902486	0.8107426397777698	1.6227683032383993	2.3773329367119898	0.8836347600217411	74.0	126.0	2.6904022388769513	0.011331919718633362
1.137793789149577	0.4060868303103703	1.2484653691267944	1.9926964029044187	0.8549026137548417	50.0	108.0	2.3309045625117943	0.011304536438829274
1.541798178503312	0.47080649027537436	1.5050647847044465	2.5525663215712027	1.0107681430678908	56.0	126.0	2.5253727465367426	0.010607113859025578
1.2028083922338708	0.7455180620982214	1.7323353188168995	2.2064483314625982	1.0036399392287274	60.0	88.0	2.1984461211838573	0.012914592907659441
1.0854309508429054	1.236830930392439	2.55742669685167	2.1849606146786313	1.099529663835726	91.0	82.0	1.9871775055675742	0.012081960338515826
0.9820378572163038	0.34758949402581807	1.1027474442615361	1.7423461096134991	0.7603082523971953	62.0	127.0	2.2916311957946154	0.009420274663859526
1.220690348819078	0.8879450283900512	2.2011428719808324	2.529171456022289	1.3084811072032112	74.0	92.0	1.9329063615050737	0.010334475529803135
0.840221552284736	0.45330599030135454	1.850358845268288	2.2264941038533888	1.3862725515686527	38.0	60.0	1.6061012687108127	0.011392714354361805
0.9142406132125093	0.376138532070067	1.3238803336102136	1.9085822399587733	0.994341626746264	39.0	90.0	1.919443165830374	0.010452087144720953
1.5281097954662668	0.506098855839156	1.2631106565848071	2.3104459820896124	0.7823361866233456	62.0	144.0	2.953264877164595	0.01084938025712049
0.8529934673825947	0.852993467382595	2.3040318589765008	2.2959532973850334	1.4429598300024387	49.0	48.0	1.5911415201219796	0.013959628297814533
0.6093272241389691	0.3263986889650534	1.3372913051629802	1.5991189428462214	0.9897917187072522	45.0	67.0	1.6156115601116563	0.010329557821500706
1.3931099737141392	0.34241995862756713	1.451823413307859	2.4527816919309533	1.059671718216814	33.0	84.0	2.3146618426869274	0.014414302861285736
1.1714966859143483	0.5239375132479677	1.2139338640103212	1.8864940155273224	0.7149973296129742	61.0	112.0	2.638463022719925	0.012497301470783637
0.6564228005051271	0.8950172376761418	2.169587320583441	1.9692117185411668	1.3127889180360397	51.0	39.0	1.500021588761695	0.014999570886445095
1.2945920969870137	0.2516367161834834	1.1273765709804893	2.1663433442050257	0.871751247218012	29.0	97.0	2.4850475994366494	0.013538901916677847
0.9402343488920182	0.39286515599685545	1.599269774457701	2.2252275342610575	1.2849931853690393	28.0	75.0	1.7317037627884313	0.010562562050521135
0.9576017006372184	0.5070855600311472	1.7844311723581883	2.1805420592155333	1.222940358578315	48.0	71.0	1.7830322173277882	0.011751165789119262
1.1501239444934774	0.2574192619600082	1.2331160191159545	2.182999293333471	1.0328753488399935	27.0	120.0	2.113516694715547	0.008997045902450367
1.8695602691690867	0.23067582076916082	1.3347443082184847	2.963413533109876	1.0938532639407892	23.0	114.0	2.709150880469729	0.012612638102179004
0.7194591803945023	0.29486738005686686	1.403007629435744	1.8016950805424692	1.082235900147967	31.0	57.0	1.6647896085281735	0.012900699386616187
1.4203691525694309	0.00858492739597283	1.0140313847686686	2.4184128241850846	0.9980436716156537	2.0	109.0	2.423153307780719	0.011714547559067047
0.847943922102276	0.693365246825939	1.8793839984975569	2.0110774634037765	1.1631335413015005	66.0	74.0	1.729016825663423	0.010675025789394164
0.7924051809261083	0.3972689540192239	1.3859028285823214	1.7451356904546653	0.952730509528557	64.0	98.0	1.831720169555835	0.0089101951110803
0.858587155537363	0.31606988571283257	1.6739362155338091	2.233902636348819	1.375315480811456	31.0	76.0	1.6242837861686716	0.009207943611842632
0.8390501621681161	0.18158474658635115	1.4103146375905156	2.060530770542054	1.221480608373938	23.0	83.0	1.686912388470152	0.009088976478559153
1.352936602814319	0.34416029968578776	1.5884870024883078	2.5918205533599394	1.2388839505456204	27.0	76.0	2.0920608037729993	0.014012168194264542
1.0304141003335168	0.24550885412375556	1.498315366525937	2.2806987200662814	1.2502846197327646	25.0	81.0	1.8241436262358863	0.010706411436765336
0.9475991926457079	0.8016816466362677	1.8025034222112306	1.977953927324176	1.030354734678468	84.0	97.0	1.919682475124856	0.009699667029484616
1.3913022039294467	0.6640336769332573	1.6589596065694971	2.380199064483434	0.9888968605539873	62.0	107.0	2.406923471422519	0.011842899736314486
1.1269678839535529	0.6251342881424109	1.6421666114198497	2.202551271043556	1.0755833870900033	69.0	119.0	2.0477736059149914	0.008689548111435547
1.531849842562911	0.5578046153546665	1.630447950227192	2.6599214639013646	1.1280716213384536	48.0	115.0	2.3579366891132105	0.010761086802612611
1.1657465780829568	0.38492654860762854	1.5137158749797566	2.319035437518288	1.153288859435331	36.0	98.0	2.010801906691204	0.010283377164745333
1.2004115787245382	0.5068354344374624	1.8548757377523308	2.5085517342496666	1.3081401555251284	54.0	95.0	1.9176475270286732	0.009887763898274369
1.0027058834411626	0.7490923874850871	1.6277217446416927	1.9069584936445467	0.9042526102033842	79.0	100.0	2.1088780636371447	0.010764756802090342
1.0619912681723251	0.6308943320297584	1.7321689555049535	2.150958035762453	1.088966767590128	65.0	95.0	1.9752283538665745	0.010337046855131253
1.3108664944974864	0.5608068651925544	1.6575402308478808	2.407505523045297	1.0966390285478105	56.0	108.0	2.1953491170502657	0.010504170219190792
1.0957009116475183	0.6171745486594689	2.0739232479814658	2.4835025200011858	1.3878016083536675	54.0	78.0	1.789522727926029	0.010763780344790934
0.9376510833609377	0.6753310603378966	2.014593054447652	2.281909289930941	1.3442582065700035	55.0	71.0	1.6975230493503473	0.010752551603397853
1.1117004873509833	0.5263983883422552	1.8965071468492034	2.40430226617617	1.2926017788251867	49.0	73.0	1.8600487060766542	0.012264936977280861
1.196919851495729	0.8019068911419915	2.1192967124545503	2.4466689193920907	1.2497490678963616	58.0	74.0	1.9577281409862883	0.013097032968514619
1.2193855320234321	0.4583699704990898	1.7883188535372534	2.5323344977164783	1.3129489656930462	42.0	91.0	1.9287379508919251	0.010413814770299278
1.0679802790125579	0.36213727010709285	1.33445744254795	2.041393042148667	0.9734127631361092	45.0	101.0	2.097150478664132	0.0105785186544747
1.105175183858423	0.13296963973480613	1.5232554535359755	2.4702008733786003	1.3650256895201773	14.0	71.0	1.8096369118495528	0.012052116365319904
0.7375290757139767	0.7518867973891472	1.753250794069704	1.8095258264931484	1.0719967507791717	44.0	46.0	1.6879956260855362	0.016419807951206004
0.9852752674240859	0.25946105491808735	1.260508768865717	1.9947359977763337	1.0094607303522478	32.0	96.0	1.9760412047730451	0.01023555240184811
1.070787042711745	0.6667443003491793	1.7467812854995728	2.21453596629632	1.143748923584575	48.0	76.0	1.9362081315502677	0.012542553192107765
1.1303123316636428	0.3093347024300338	1.2827883477200244	2.105514660269887	0.9752023286062442	32.0	89.0	2.1590541762539486	0.01247639825578542
0.7318193481537809	0.7092229654491268	1.6349750988985614	1.659361463727962	0.927542115574181	75.0	76.0	1.788987729900285	0.011041361742576519
1.431985960441333	0.7658009639421994	2.0763334775885887	2.713217916458985	1.281231956017652	51.0	80.0	2.117663319054465	0.01353091547250245
1.1425646697945777	0.3020100645039254	1.4674272147083383	2.311230631513843	1.1686659617192654	29.0	86.0	1.9776657378757834	0.011439518657321485
0.8112229782252751	0.11254100935302791	1.1986182232629503	1.8934673546790912	1.082244376453816	14.0	75.0	1.7495746763622877	0.01076005658452585
1.250736252340809	0.2364743970157568	1.2041398842318527	2.2167824801305405	0.9660462277897315	26.0	95.0	2.294696067705202	0.01261371664694453
1.4392288668289044	0.19795220251313062	1.4893491749285372	2.7204214923664383	1.2811926255375339	20.0	98.0	2.123350882717628	0.011085130567438352
1.675418347949434	0.8961230276945924	2.201625352338753	2.87984129416482	1.204422946215386	65.0	96.0	2.391054822738175	0.013100491759611614
1.247245377243245	0.7191138822451266	1.8642122583961205	2.441914367537913	1.194668990294668	53.0	86.0	2.044009166870238	0.011993042632752523
1.0974668657164235	0.7186775942361299	2.198171916534437	2.54339369656496	1.4459268308485365	45.0	61.0	1.7590058101850004	0.013356725380234778
1.6012074811525026	0.693943749735922	1.9370968395827175	2.7939609800853695	1.192753498932867	58.0	94.0	2.3424462662109744	0.013063999510930152
0.8795602162612142	0.6211218770682561	1.794172231217973	2.10085096183255	1.2212907455713358	48.0	70.0	1.720189045442856	0.011179530328994386
1.4025917711720042	0.2433234125520367	1.539303857228966	2.6072588436570587	1.2046670724850546	34.0	95.0	2.164298255682094	0.011725256068372101
0.9453073725389134	0.19999721285083938	1.2417841200965467	2.0000234784313484	1.054716105892435	23.0	92.0	1.8962671255873667	0.010034371845799861
1.7927223086444728	0.38377144203278335	1.4818592331566358	2.878481151930361	1.0857588432858882	39.0	120.0	2.651123838161948	0.01172170051943669
0.7729899774780074	0.40505852315589874	1.4272410044622517	1.8033160609569128	1.0303260834789054	44.0	73.0	1.7502381914548835	0.01106234620624278
0.9513325628218247	0.7876788256037813	1.770318530496284	1.8873271712044757	0.935994608382651	86.0	94.0	2.0163867978531167	0.010763536314354111
1.1043718440840284	0.34711265255963064	1.155891199526944	1.930982042747487	0.8266101986634586	49.0	125.0	2.336024943642942	0.009792445433051139
0.9003225269291619	0.6141549485868985	1.6338288345175536	1.9392071071631958	1.0388845802340338	51.0	70.0	1.8666242083661908	0.012863307303281455
1.4528324245405806	0.6059398016685966	1.7178476029755814	2.598288118253851	1.1454556937132703	52.0	107.0	2.268344496006541	0.011043362248815367
0.8994396160741902	0.35173434084264454	1.3564592332159593	1.903879291717913	1.0044396756437228	39.0	83.0	1.8954640461586303	0.011115073388090245
1.007661083571736	0.20152773731412799	1.230772364913317	2.0263317302823127	1.0186706467105768	23.0	80.0	1.9891922250097298	0.012402283716527131
1.196046618764121	1.078376507061805	2.1920124310251854	2.339185391068592	1.1431387723044708	79.0	86.0	2.0462829603382207	0.012011693662568983
1.0511329772763136	0.5077924750795095	1.7433182442216486	2.2762715074463946	1.225138530170081	55.0	99.0	1.8579707122021452	0.009027553133613107
1.1847751257426544	0.6199298808433644	1.9236727060474228	2.4112926449895964	1.226517519246942	64.0	95.0	1.9659667368388536	0.010265672760166619
1.0379727945033665	0.6963470664181359	1.539931820982872	1.9307241632841734	0.8927513687808067	65.0	92.0	2.1626672675068344	0.01209577956140134
1.3401249424767254	0.32988865852856386	1.6085394449740447	2.5797067758686105	1.239581833391885	38.0	102.0	2.0811105054756434	0.010366211501758957
1.0551527505240736	0.28287759638973364	1.5129551070622644	2.2881782191208715	1.2330254685967978	25.0	76.0	1.855742867764811	0.011736800317066788
1.3843544089558009	0.820882548524515	1.753505989685473	2.3767658170590824	0.9924114081032815	73.0	111.0	2.394940039636998	0.011351257087500111
1.0802830926483864	0.9324428253507617	2.086905432066749	2.2488452021210295	1.168562109472643	69.0	77.0	1.9244550066199768	0.012265583657355661
1.2815765461778295	0.5885853428902199	1.863170090726906	2.531042946823189	1.2494664006453595	53.0	90.0	2.0256990868388978	0.01131577645408482
1.6077332800365358	0.8465477884350976	2.2100679414110385	2.858735742362849	1.2510024623263134	58.0	86.0	2.2851559676764026	0.01386386786314525
0.6968598537755377	0.39882333599007436	1.6808110127604166	1.9786315400803418	1.281771686304804	38.0	60.0	1.5436692518809665	0.010439394540553463
1.027700572778634	0.7884409923828481	2.27844953023293	2.5017528823197592	1.4740523095411253	39.0	47.0	1.6971940996439663	0.016237267407852307
1.4387078059108744	0.20303766094435427	1.1111731698289822	2.328254758517516	0.8895469526066416	25.0	104.0	2.6173489231737856	0.013347175627903142
1.160880064387198	0.20729874986844998	1.1643350340454341	2.0678601425077314	0.9069800781205334	34.0	103.0	2.2799399814743477	0.011543648995231756
1.0463066563369232	0.2897745773466335	1.1513381205366142	1.8948380153325768	0.8485313589956536	39.0	98.0	2.233079538245189	0.011826884063854017
0.9912627364350224	0.20588149647635068	1.511456752306841	2.2873882771315963	1.296125540696574	21.0	76.0	1.7647891391001294	0.01078283970272616
1.3531611671177972	0.6274901977487704	1.6095187650593292	2.340956336970449	0.9877951698526519	73.0	121.0	2.3698803237918713	0.010287720715177319
0.7865375709398799	0.6035227877397307	1.5241641365262255	1.7444485056268895	0.9579109346870096	70.0	88.0	1.8210967663678204	0.009827358907350139
1.0528340456128351	0.6941447186024452	2.2641386790030156	2.5307973078240376	1.4779632622112024	59.0	72.0	1.7123546792615634	0.010777521631554213
0.9781385426303228	0.9581279348993665	2.2631742164615005	2.141164173581895	1.163025630951572	65.0	65.0	1.8410292229157692	0.01354634656878227
1.3702075418314448	0.5481293087001704	2.055830959593382	2.851865109373299	1.4816575675418542	38.0	76.0	1.924780173130482	0.012430180088417108
1.4128890132697376	0.11017913876085106	1.152251821346867	2.4342237784356957	1.0213347651659581	15.0	105.0	2.3833750318292117	0.011933390306261024
0.9391688211918647	0.2503237329504855	1.3517041670904568	2.0629598279756514	1.1237910067837866	34.0	112.0	1.8357148397900975	0.007824481854457097
0.9628526969881991	0.36815368679702554	1.2818057256567768	1.8786288545677805	0.9157761575795814	47.0	95.0	2.051406164070751	0.01091171751184787
1.0851015889933768	0.6500969530404355	1.7016992371283504	2.1597977097710803	1.0746961207777035	40.0	61.0	2.009682242277141	0.016507662458948035
1.8786767701237872	1.0316334260991686	2.2303848163550617	3.0291901569859947	1.1505133868622075	93.0	137.0	2.632903007975855	0.01019455748712828
1.6473807621747159	0.5757676573590518	1.866200029791158	2.8568562869612806	1.2094755247865647	52.0	98.0	2.3620620908930157	0.012653539683381017
1.3256879773671675	0.5822707333639467	1.9094641669377357	2.648151520308548	1.3224635429413807	46.0	86.0	2.0024382028850605	0.011648345586084904
1.0821381092841413	0.22487764469765037	1.4436619384042189	2.2431366409613482	1.160998531677207	28.0	79.0	1.9320753470039778	0.012027232372650666
1.1521098123943532	0.26946303335177224	1.2826305610345152	2.1582891499847197	1.0061793375903665	31.0	92.0	2.145034259154502	0.01196739880149664
1.1347608844610815	0.27526157314499367	1.3815332532303946	2.2615050965596124	1.126744212098531	29.0	105.0	2.0071148999715027	0.00957260198159879
1.125965814978179	0.7871613236269808	2.161937968788538	2.51066117634648	1.3846953613683008	53.0	71.0	1.8131505646596118	0.012091531436047433
0.8716965070016818	0.8335606925515919	2.193076118670011	2.289643994794357	1.4179474877926752	58.0	63.0	1.6147593719134516	0.010973320532042126
1.06131602733795	0.8325045663302859	1.7920546067419576	2.1075569584692366	1.0462409311312866	71.0	90.0	2.0144088189996188	0.011226183380482419
1.4272229548613753	0.3523463197551979	1.3974003223755325	2.43857620198767	1.0113532471262947	40.0	102.0	2.4112012384562482	0.01244854963779027
0.8751150166597401	0.2676135457733564	1.2767388015738719	1.8887472217157923	1.0136322050560522	33.0	86.0	1.8633457108945624	0.01044064378724912
1.254163927762164	0.3784761642024639	1.5973568345963285	2.5135755554569603	1.2594116276947964	32.0	89.0	1.9958332130518457	0.011202147900918752
1.0129301552793155	0.5186779963485928	1.4706160774552792	2.020846151541939	1.0079159962626236	43.0	79.0	2.0049747786871968	0.012703596058284835
1.2396753874530104	0.20504070792042706	1.3882165550161751	2.387779241371146	1.1481038539181354	25.0	93.0	2.0797589287958305	0.011359315170674301
0.7524571178023971	0.29935829557470217	1.2753090443399568	1.7485987311820055	0.9961416133796084	33.0	78.0	1.7553716336069294	0.010407391013093953
1.1096166872302315	0.4689389122996477	1.41272318570407	2.0326282988886537	0.9230116116584222	55.0	99.0	2.20216980286578	0.011504300153351717
1.365344481409925	0.7291797516145493	1.9774126979804667	2.6167348563334776	1.2513903749235527	50.0	85.0	2.091061996935476	0.01252042160427497
0.9810122333491464	0.5772908396732186	1.6251452654567315	2.0405570584579866	1.0595448251088402	48.0	71.0	1.925880821746615	0.01331716096362835
1.668343337939628	0.43112354683962417	1.5661083497836175	2.776464583291948	1.10812124535232	52.0	131.0	2.505560284975124	0.010115520993249314
0.8543316315520214	0.3207241299504662	1.2894574435114354	1.8241813340792967	0.9698497025272753	31.0	66.0	1.8808907496963374	0.013809334140923148
1.3699699709918778	0.22850653102434382	1.1190166902373595	2.266389998865113	0.8964200278732352	31.0	128.0	2.528267919495445	0.010454291823491479
1.1713595200813842	0.8442232995970154	2.241791972580156	2.580966994090511	1.4096074740091267	57.0	75.0	1.830982767670683	0.011634909509962531
1.5462756657762131	0.6376469656133787	1.656893875921577	2.5026037211574814	0.9563280553812683	68.0	116.0	2.616888323076274	0.011964244465682568
1.097299094075569	0.48746738575450244	1.4800331581063375	2.0566695123653824	0.9593704182898135	58.0	95.0	2.143769990356414	0.011580527623982975
1.0349235542794615	0.45346133780033515	1.7394772486417285	2.2992140991502645	1.264290544870803	49.0	85.0	1.8185804746212189	0.01015073845168868
1.7967597550477001	0.11734148608103201	1.6371850698158328	3.2640133293581144	1.4672535743104143	15.0	104.0	2.22457343877465	0.011091622368254178
1.8543303389258892	0.26278004663801147	1.776086476548039	3.3097679396444573	1.455437600718568	33.0	139.0	2.2740706561451915	0.008527173237049613
0.9893906175123572	0.2039340105070382	1.2048491670832029	1.9976669067989505	1.0082762892865933	30.0	112.0	1.981269348515972	0.00880736628814716
1.6887144686917483	0.2193086756984326	1.4684952758404493	2.8805259783368684	1.19181150964512	23.0	91.0	2.416930827589162	0.013990947075290961
0.7498045643732023	0.14599760254249983	1.6585952324146023	2.243737973792818	1.4939334094196155	13.0	48.0	1.5018995891286058	0.012224757570398192
0.8986595372302679	0.7807612936569197	1.7139526461971468	1.8221868695998162	0.9235273323695483	90.0	98.0	1.973073027437666	0.010004534225729509
0.5089969575147042	0.8905999918725347	2.0459776022136063	1.6355835682822346	1.1265866107675304	76.0	48.0	1.4518045507108686	0.011205150905945682
1.204442787717326	0.3523937320146946	1.630926794696669	2.4837692756726826	1.2793264879553565	33.0	87.0	1.9414663098567504	0.011001685890424577
1.117202128415497	0.4785738390990759	1.860066488093395	2.477449561824035	1.360247433408538	44.0	81.0	1.8213227248045507	0.010678846663805511
1.0834762421269186	0.3776040530867677	1.320729932569203	2.096669403371073	1.0131931612441543	34.0	100.0	2.06936789900601	0.010491901550519855
0.5162673704297267	0.5162673704297269	1.7393708962028374	1.5891737399209662	1.0729063694912395	48.0	47.0	1.4811858565762221	0.012058567634086359
1.36838017599857	0.21024935198214822	1.3433768235744419	2.4256464998705947	1.0572663238720246	29.0	91.0	2.2942625193878814	0.013165170111784273
1.4561381595730496	0.8060786750497096	2.018615517290748	2.567589485064669	1.1114513254916196	81.0	112.0	2.310123193140255	0.010785444545009888
1.3126558132242878	0.17263744626219713	1.4507618708965737	2.51282834522494	1.2001725320006522	27.0	93.0	2.0937225925643617	0.011463121562205409
1.129858366661292	0.6513335915930174	1.8463822387422293	2.374004692061693	1.244146325400401	60.0	95.0	1.9081394556204407	0.00981228014731928
0.6457851401628703	0.33504200733324163	1.3861784374269912	1.7134461569100632	1.067661016747193	46.0	80.0	1.6048597167388974	0.008530589933275498
1.2674887092733729	0.6117271614192767	1.9418887270956935	2.4946758145034447	1.2271871052300718	56.0	86.0	2.0328406351986117	0.011901129294808898
1.2468907555274267	0.46320950267547034	1.3421149827822882	2.1190121101590984	0.8721213546316717	50.0	105.0	2.4297216194803917	0.01219800980367597
1.497597334911194	0.5798876487678422	1.8257068759160455	2.741519512316969	1.2439221774057752	45.0	92.0	2.2039316945329035	0.012392168606535041
1.533928916370623	0.47178620550692574	1.1702498975934186	2.275912977057309	0.7419840606866864	49.0	126.0	3.06733405425315	0.01283321662538632
0.9392648571196278	0.09683310392102273	0.8738801317733643	1.719629359004375	0.7803645018847472	16.0	110.0	2.203623248944695	0.010362523536360123
0.9608845895131004	0.770194260415914	1.9760527077488006	2.1180629061950693	1.157178316681969	76.0	85.0	1.8303686438476392	0.010260402853499459
1.3635684219928572	0.8335947490684912	2.1241291776266746	2.5912681993189994	1.2276997773261422	69.0	96.0	2.110669275319597	0.01122604726910747
1.2339138349907726	1.0267616792517646	2.164440443820291	2.3788134109986276	1.144899576007855	70.0	80.0	2.077748529956925	0.013187763191635097
0.9798671268348367	0.9778599465049864	2.0954565885676097	2.187441851456878	1.2075747246220414	61.0	65.0	1.811433948438698	0.01318664924260383
1.5231866159589145	0.18168208814088627	1.2918861001496977	2.5929716470451485	1.069785031086234	23.0	103.0	2.423824947720859	0.012400830184173942
0.7899696627341014	0.11920801739116071	1.0953303155038756	1.7596846075917658	0.9697149448576644	17.0	81.0	1.8146411137863343	0.010613385814128806
1.1431303317201322	1.3809995509663173	2.371013961007232	2.2882498871444468	1.1451195554243145	73.0	63.0	1.9982628681042434	0.015853117138246303
0.8744948121957987	0.6160150054515148	1.7637028418478269	2.0402305428521395	1.1657357306563407	59.0	81.0	1.7501655728639582	0.009969029795069433
0.8516192169221848	0.5459560633103607	1.2026538181215516	1.5981794728180831	0.7465602558958984	58.0	95.0	2.140724020863141	0.011558934920957274
0.7686378177319813	0.0775375201793389	1.1527191047639755	1.8267278323550824	1.0580900146231011	15.0	90.0	1.726438967487823	0.008753325926712782
1.1250673348098859	0.490964653309637	1.5616864629064917	2.2811727557849073	1.1561054209750214	35.0	81.0	1.9731528928054336	0.01210497222037849
0.8870390518506182	0.41779824423554146	1.8803462823858947	2.3295578906124446	1.4425188387618264	34.0	62.0	1.61492372093525	0.011152677782054615
1.02555959845425	0.8363863046368845	1.859606995981016	2.038959742456512	1.013400144002262	69.0	79.0	2.0119986705389308	0.012767460150118759
0.8778260129906061	0.7648639219273878	1.9544922791574342	2.009249449708854	1.131423436718248	57.0	59.0	1.7758598456620147	0.01404267331969339
1.0963358718555112	0.33044909059733296	1.5870311241624073	2.319863977231166	1.2235281053756548	41.0	97.0	1.8960446981468462	0.009515391498251669
0.7136308432784877	0.19943155762916454	1.3838535511156362	1.8853695519006048	1.1717387086221172	23.0	62.0	1.6090358183333107	0.011067684546496539
1.334278756845627	0.07598140838591327	0.9996301143496984	2.251730065561167	0.9174513087155399	11.0	112.0	2.4543319565521777	0.011565449924070537
1.2187109802869105	1.3068271090396681	2.5312873998082703	2.442320486919828	1.2236095066329176	83.0	78.0	1.995996658803766	0.012783452636917261
1.216669196060546	0.7446054285816381	2.0974632567563685	2.586760976163931	1.370091780103385	46.0	71.0	1.888020214214217	0.012913721283000305
1.0819021566776166	0.4871737245243728	1.5078663115587416	2.1346223803481235	1.0527202236705069	42.0	79.0	2.027720501944345	0.012909605152548851
1.3217578975946347	0.5226304118621201	1.7871203419812194	2.582112348447492	1.2603544508528575	43.0	82.0	2.0487191890346614	0.012618564056119295
1.5545871495684975	0.49594735438768756	1.6171159422815136	2.6769029500085497	1.1223158004400522	43.0	104.0	2.385160174131875	0.012058520700801807
1.3472095897360419	0.14313966286397783	1.2168933469689749	2.402857351753677	1.055647762017635	23.0	128.0	2.2761923419997134	0.009270488069541769
1.0212629339897086	0.24092862929531245	1.3156015633596079	2.137833151638729	1.1165702176490202	26.0	116.0	1.9146428212459539	0.008078235180015367
1.222397601611621	0.19164795388343503	1.136469566233237	2.1903731912526534	0.9679755896410326	18.0	92.0	2.262839285094926	0.012805805683732966
0.9747265816361865	0.8322639939410481	1.90486242574647	2.043443720561983	1.0687171389257963	72.0	80.0	1.912052914783342	0.01168903061862226
1.148773560221813	0.712244264523215	1.612489976644281	2.1173958754832003	0.9686223152613873	62.0	93.0	2.185987089211145	0.012132095486534062
0.9670130388277443	0.38169187663489	1.5686727333135397	2.0619175036158097	1.0949044647880655	61.0	98.0	1.8831939862579001	0.009318179779918232
1.0395890898858011	0.300136621508841	1.3855414550489267	2.161309526978406	1.1217204370926048	33.0	106.0	1.9267809121676693	0.008926344687898114
1.2280115595095698	0.556370887705572	2.1887917143290476	2.7620747857771195	1.5340632262675498	39.0	68.0	1.800496054192878	0.01247638879190345
1.1580127429797191	0.07643576232986848	1.0950438869065167	2.146694564896599	0.9886818219168798	12.0	86.0	2.1712693783876156	0.013006264243244971
1.27772806883269	0.8618883878429886	2.0112640491832385	2.3759834756532103	1.0982554068205204	69.0	87.0	2.1634161424542837	0.012796680466962659
0.9297764727672826	0.9788047681455192	1.9684693121098638	1.9658553713945053	1.0360788986272227	82.0	78.0	1.8973992945896418	0.011846452768160981
0.8907249936003658	0.672906861735604	2.0576791149003353	2.259766480768278	1.3690414871679122	53.0	65.0	1.6506194311488522	0.011123192754517609
0.8977259021561066	0.8517783013813227	1.9313189285735015	1.9591701238528467	1.0614442216967401	82.0	83.0	1.8457589045245104	0.010653182151217076
1.290283438555211	0.8295261170468649	1.9930593287449794	2.498140733825097	1.2078572952698858	70.0	103.0	2.068241623913782	0.01017868679080836
1.3879711079370445	0.9561125974141271	2.2081705434699366	2.632360321493309	1.2443892135562646	68.0	91.0	2.115383428927711	0.011878232815584602
0.8314628000705385	0.505722447273268	1.375144300283345	1.7551216750962464	0.9236588750257079	53.0	89.0	1.9001838476866222	0.010406056289598098
1.0960435364631045	0.31796783888107194	1.0496265802674059	1.855985676467778	0.7599421400046736	50.0	134.0	2.4422723504402106	0.009613612624576403
1.1262327678430022	0.6003844455279947	1.9856793394292032	2.478031055930591	1.3517982880875887	42.0	69.0	1.8331367022489	0.012671222837486432
0.8066313734411721	0.4052330737645824	1.4825358906091424	1.8808064599927112	1.0741750865515391	38.0	68.0	1.7509310014168438	0.011884150483830834
1.2135992802472289	0.021912172297214094	0.9218458927823784	2.1039202105156503	0.8903209302684214	4.0	96.0	2.363103167619953	0.01292377724391811
1.1154525743915844	0.5208809017188942	1.7319096611769096	2.303090783731003	1.1876382093394184	46.0	75.0	1.9392191709729643	0.012739678218229968
0.9161878238710686	0.22085285464344362	1.1873991648369113	1.860913594956209	0.9447257710851404	33.0	92.0	1.9697923481209871	0.010630908167881412
0.9506615372368412	0.19696891671472594	1.2350736232722264	1.9802067773253391	1.029545240088498	26.0	91.0	1.923380051910224	0.010369712762574606
1.1435098985807381	0.1719221774349604	1.433228301154531	2.395836344220185	1.2523264456394467	16.0	74.0	1.9131084810692902	0.012647549766327917
1.361141351848422	0.5339341659632875	2.10108625813437	2.8672638216814677	1.5061224698330455	43.0	85.0	1.9037388254351622	0.010927477275377295
1.183674704055049	0.3639976747871063	1.5283445573419523	2.3628921589218996	1.1792174548668506	45.0	119.0	2.0037798365092057	0.008426252121282955
1.0811696556141595	0.46382853139025015	1.6110420052724719	2.1988056564375595	1.1176360008234	49.0	87.0	1.9673718946218852	0.011221490778562238
1.539636764023163	0.315398696288995	1.5856144666795546	2.8003781141783612	1.2607413501551983	30.0	104.0	2.2212154093570677	0.011070666438104431
1.1762939885667647	0.13653658817955594	1.2012882580715554	2.2486525803098805	1.0723585917431158	16.0	104.0	2.0969222400267267	0.010271859260575132
1.2753388962465957	0.19237202667516762	1.3909516457626339	2.460436525551527	1.1850976293049311	17.0	75.0	2.0761466943399354	0.014052111784407748
0.8636412359143042	0.5417597480482884	1.28827931112734	1.5962812535793338	0.7326400176650296	60.0	84.0	2.1788070745395314	0.01337545781783631
1.5724967506272605	0.6815643669157998	2.3119622028796853	3.1566303258756796	1.5841335752484191	49.0	91.0	1.9926541392702104	0.010930673916525354
1.249082402653074	0.4318784099700379	1.434913882904874	2.2502059134976897	1.0011235108446157	44.0	97.0	2.247680619945948	0.012045742814605824
1.20047113352021	0.5765224097280854	1.7889757879110488	2.46557228057534	1.26510114705513	48.0	96.0	1.9489131650181772	0.010027810540569566
0.9795829475182594	0.7719521217023315	1.487085037644335	1.7787234644927996	0.7991405169745402	72.0	93.0	2.2257956225606663	0.012412055132648023
0.9029396093267823	0.8319011553537385	1.8547048064663272	1.9862891988440519	1.0833495895172696	60.0	67.0	1.8334702094908475	0.013053385449352013
1.055347753087585	0.34573824718402335	1.3637813885358705	2.054255026717188	0.9989072736296029	41.0	95.0	2.0565022209247728	0.010949396104013612
0.931508776123064	0.8229544691884587	2.0960667639820296	2.1259082976481953	1.1943995215251313	78.0	79.0	1.7798971444107903	0.010529036380210976
1.3077916451853122	0.4648837591731536	1.5514527529610755	2.365696714073173	1.0579050688878606	53.0	104.0	2.236208884564802	0.01116398996931067
0.8333532210142838	0.8174792215834641	2.3390476400683173	2.2953255189147868	1.461972297900503	65.0	65.0	1.5700198438855775	0.010012042981949318
1.2659260188525536	0.6012844922977731	1.450149508376445	2.1177028691736086	0.851776850321055	70.0	115.0	2.4862179200754233	0.01142567613858413
1.076926397145209	0.6921864641641222	2.139127801626042	2.4762080319810242	1.3992816348358152	47.0	62.0	1.7696280508044901	0.013281389667360777
1.271485918348171	0.5498619909915046	1.6758909072755406	2.3412989897838195	1.0698130714356484	58.0	98.0	2.1885122291896146	0.011530106588127614
0.8373872310121757	0.30233889728011687	1.3071584931424094	1.8458428747515425	1.0084556437393668	33.0	76.0	1.8303659523458393	0.011475422646137063
1.045794812374947	0.9361734589551489	2.206363161133328	2.332441945693213	1.2866471333182659	66.0	72.0	1.812806235131337	0.01191978789467627
0.4891082607839343	0.5995170319604695	1.6604340166251859	1.5615114890501693	1.072403228266235	66.0	55.0	1.4560861510783407	0.009856285760712347
0.9334721046612082	0.683007939417963	1.6810188451774317	1.8811483395587116	0.9476762348975034	74.0	87.0	1.9850116213605047	0.011369510962425269
1.075078798113862	0.2500955846166717	1.2340345427463433	2.0715890724725945	0.9965102743587324	33.0	113.0	2.0788436665198353	0.009343197066633993
1.1337173692283469	0.24076386195969912	1.1538452548538736	2.0294243356018313	0.8957069663734846	30.0	94.0	2.265723514263278	0.012552891703662111
0.6249467599630227	0.5753083333741684	1.8337437455985839	1.9110946041137917	1.286147844150769	48.0	53.0	1.485905848853379	0.010780051048743378
1.571197473626582	0.3358979185652837	1.2511716044661396	2.4490053872479804	0.8778079136213985	42.0	122.0	2.7899103542420836	0.012132940704400208
1.3879563736388225	0.29600289161473103	1.4930760883991574	2.5624984804180873	1.1745421067792647	31.0	101.0	2.18169997110173	0.011143096186894633
1.0851442679847159	0.09518020937050331	1.0873259982829764	2.048612748867493	0.9634684808827768	14.0	82.0	2.1262893281059427	0.01327241366339428
1.489142978027702	0.05087413400331542	1.220740872507077	2.6435037017791463	1.1543607237514444	7.0	101.0	2.2900152849867252	0.01183522007721405
1.1205073102011325	0.42873632840305453	1.7613232042010014	2.407724498423203	1.2872171882220707	49.0	92.0	1.8704881510701383	0.009819726379533442
0.8773215696141997	0.061891710341902884	1.013253145070265	1.8264694294125179	0.9491478597983182	9.0	88.0	1.9243254995071257	0.01073128240343331
1.4038171605664618	0.549964688605441	1.9257874818915688	2.8041683180843435	1.4003511575178818	50.0	111.0	2.0024750956429553	0.009025083786072495
1.1446343716457181	0.362039805896738	1.379142870795276	2.1616636674925007	1.0170292958467826	46.0	113.0	2.1254684366714245	0.009626379071077846
1.1809663951689924	0.3460753771782863	1.4635873759650897	2.3277046272674267	1.1467382320984343	35.0	101.0	2.0298482793304307	0.010112593043971657
1.0886831679483626	0.7889358378405205	2.0975306491887387	2.4135790277694302	1.3248958598210676	58.0	75.0	1.8217122575168991	0.011537268014024897
1.5778058846035306	0.5521826305829272	1.738288619573762	2.773935113090185	1.1961292284866545	46.0	105.0	2.3190931606944964	0.01155772167525029
1.202539782182253	0.29175146082037573	1.2734188772952602	2.1557170042392824	0.9531772220570294	39.0	102.0	2.2616119587783268	0.011542660949746337
0.9767647657474638	0.59143623846649	1.634946101094254	2.0556664123148676	1.0789016465674037	61.0	97.0	1.9053325378222425	0.009588070240837139
1.2958940092218425	0.8748914939685386	2.0065432590315084	2.4440242511009975	1.148130241879155	61.0	80.0	2.1286994819514913	0.013624653655489634
0.9174476509177065	0.4035424221595345	1.3782377520043243	1.9584819327398657	1.0410342818221592	38.0	87.0	1.8812847635640446	0.010479520013169317
1.07260675602823	0.45326968106114496	1.3950258070190913	2.0806163285897075	1.0080095725614775	45.0	100.0	2.064083898829059	0.010455016131858865
1.2966811402528837	0.8319405899453265	2.1961783815888425	2.721819559127143	1.425138418874259	47.0	69.0	1.9098632968418283	0.013528541703103938
1.2858818452626282	0.16627644305571598	1.240922891643961	2.3697247230002305	1.0838428777376024	20.0	118.0	2.186409830866591	0.009564100439423743
1.2856660973887761	0.2796342937922127	1.3939468077779558	2.4081812598982517	1.1225151625094756	24.0	84.0	2.1453440811566082	0.013109631583627514
1.2422941687368174	0.9580167846982888	2.014184367705188	2.3544399813769847	1.1121458126401673	68.0	84.0	2.117024543560242	0.012881404704949834
1.1800124932129292	0.5287969320540709	1.5836193196699653	2.2665102981362493	1.08649780492332	47.0	93.0	2.0860698363732166	0.011406316736223778
1.0091132847921562	0.56787989094536	1.8356376547396893	2.2997169429842326	1.2906036581920763	47.0	74.0	1.781892472089966	0.01126230108609454
1.2846057509511912	0.2407165075984259	1.3749408442227322	2.3565226708004663	1.071916919849275	36.0	106.0	2.1984191378673477	0.010721381777323217
0.8364019232264113	0.6867067275906826	1.8898629745747075	2.077104839138243	1.240702915911832	42.0	51.0	1.6741355343810995	0.014576790785826771
0.9333730287041426	0.33836215614509135	1.7739963434841726	2.330717767680177	1.3973447389760345	31.0	68.0	1.6679618870487984	0.010854210640564979
0.9306878755608186	0.2254081990411798	1.477338010899314	2.16083558465537	1.2301477090945514	28.0	80.0	1.75656595438108	0.010159471836751158
0.8763276457968507	0.500770728947699	1.4116505431098436	1.8470454489608492	0.9707178031639985	43.0	75.0	1.9027625154710375	0.012374606793589435
0.7397399697256388	0.24209446365687393	1.1861611028905774	1.6787065339762497	0.9389665642506109	25.0	59.0	1.7878235475999353	0.014206853461261305
1.6076207689202004	1.177697049843233	2.5281035590753795	2.924723946267203	1.3171031773470026	96.0	117.0	2.2205731461056666	0.009837026450763372
0.9675542106616297	0.9475706233459911	2.119202461918885	2.2514373881197893	1.2838831774581596	63.0	63.0	1.7536154594510693	0.012862419395535963
1.2848054275063985	0.4531915250940841	2.0407493926294227	2.7776770511821764	1.492871623675778	43.0	79.0	1.8606268664568257	0.011339098274424288
1.2270201473514324	0.5374056751771639	1.7780887919568102	2.4810242603395607	1.2540041129881283	39.0	75.0	1.978481756672714	0.013125250166206052
0.9949381491689014	0.25894310429227985	1.142425069036122	1.8771537327553176	0.8822155835864162	33.0	96.0	2.127772131528488	0.011347329763223312
1.3950839062769171	0.26421887899458985	1.3789286577262172	2.4984152553765693	1.1033313490996521	24.0	86.0	2.2644287751049066	0.013711013509965387
1.1058868854964816	0.6114599378896366	1.7736267851490393	2.273259596085279	1.1673727105887972	59.0	90.0	1.9473297392215863	0.010683302163572633
0.7024512054733075	0.47060587173804647	1.3312689796815886	1.5972421103579393	0.8947909048846318	49.0	71.0	1.7850450889013862	0.011774091776201761
1.0028556010757508	0.44218580179553557	1.5661826455609187	2.1221252137309428	1.119269612655192	47.0	85.0	1.8959910907406148	0.01085826100035524
1.5680831797910382	0.300139922305254	1.105272239446515	2.3864117930040973	0.818328613213059	39.0	140.0	2.916202310993584	0.011029220070265796
1.5264047551627646	0.29651211183058224	1.407103460476501	2.64763456723433	1.1212298120715656	37.0	138.0	2.3613665447787233	0.008982768132602893
1.0009791334537455	0.6504246168548904	2.078007659648224	2.4797049003748732	1.4787257669211278	43.0	64.0	1.6769200590437372	0.011653342428061576
1.6476975268201837	0.49955492667108303	1.6711568011245126	2.7836269903168196	1.135929463496636	47.0	104.0	2.450528029925569	0.01243358316202542
0.7684894676026146	0.6302826428207924	1.7177751708859896	1.8709476119429347	1.10245814434032	47.0	56.0	1.6970690647511675	0.013625808548160973
1.0097823449663936	0.33440929531745933	1.172226830909456	1.839345425483739	0.8295630805173454	43.0	96.0	2.217246004169637	0.011966342151796646
1.3196275897687915	0.4710670002987566	1.2021176560177436	2.0793065497641163	0.7596789599953249	59.0	125.0	2.7370858734549035	0.011621125588734566
1.2291724139618323	0.39549217467022735	1.7316640850976703	2.4956541434350528	1.2664817294732205	44.0	86.0	1.9705409761205899	0.011378973833658585
1.4129994927015859	0.3010750245726943	1.1792364621531617	2.3609972827354926	0.9479977900339068	30.0	134.0	2.4905092686461296	0.00982418492638167
1.0842648468449245	0.2540913935175271	1.2554166011723633	2.034439147107837	0.9501743002629124	36.0	91.0	2.141122051548763	0.012069967437364703
1.1058469332648508	0.3336026110360596	1.275737918601386	2.0376311944952623	0.9317842612304115	42.0	104.0	2.18680576532232	0.010854087348024637
1.177636445712602	0.13735147037832818	1.042495952897551	2.06819599381684	0.8905595481042381	18.0	93.0	2.322355645076709	0.013070848636028953
0.7720214588142946	0.5613602767826975	1.6608770100762535	1.8883899103449426	1.116368451530648	70.0	88.0	1.691547183867279	0.008617538864782061
1.3829142519753999	0.41626715765442945	1.6093508781193409	2.5130321157678965	1.1301178637924967	50.0	107.0	2.2236902860154415	0.010775288453505706
1.0916356080291374	0.933247335082426	2.2216356223607607	2.457450520755911	1.3658149127267736	68.0	81.0	1.7992558858870178	0.01046173305967243
1.0711535292087486	0.8689379455256052	1.8705722332229673	2.1265152279044957	1.055361698695747	78.0	94.0	2.014963429630351	0.010752698456882271
0.7744480517610093	0.48962907367987807	1.7179029440588494	1.9942596469375804	1.2198115951765711	42.0	59.0	1.6348915314654848	0.012020252912453455
1.0597072377318537	0.36697984818705187	1.6880316663921193	2.3641417311333877	1.304434493401534	34.0	76.0	1.8123882365058344	0.01128805305305608
1.6035209718167605	0.5329640250148255	1.8777271679771508	2.9328904891364127	1.3293695173196522	44.0	104.0	2.206226674318415	0.010976740628290503
1.1689520583428215	0.5757831521808832	1.5597970095043627	2.1338732706749663	0.9649212123321449	53.0	82.0	2.211448192249343	0.013963310298967805
0.8672420792558888	0.2793487806830337	1.5189599657421777	2.136017978080405	1.2687758988245161	27.0	76.0	1.6835266023411726	0.009887980502279696
1.1882821529007646	0.6259882013983826	1.5724919149330765	2.138427299311069	0.9501451464103045	74.0	117.0	2.250632240126841	0.01000282338010495
1.2370251868006936	0.5586195099434812	1.4651854688536108	2.173091414166735	0.9360662273660413	49.0	95.0	2.3215146008221113	0.012790172153155883
1.6396666303937104	0.6950440252138974	1.8370695706577915	2.7505128065681737	1.1108461761744632	59.0	113.0	2.476051919303896	0.011575589080904582
1.4593443366575178	0.698134843576955	1.938892719720775	2.6281665281370366	1.1688221914795187	62.0	98.0	2.248559744412664	0.011928583847337516
1.5558852623688584	1.1593598752104455	3.055311864676628	3.374192785729979	1.8183075233611208	46.0	55.0	1.8556777345851938	0.016217203404579716
0.6866227537247214	0.5700342614508702	1.8181223394300523	1.9568947901881275	1.2702720364634061	46.0	55.0	1.5405320545639687	0.01133506730024523
0.8793343216994602	0.6529588235682378	1.8147050960224351	2.061588999564746	1.1822546778652858	55.0	71.0	1.7437774095233123	0.01129881540968149
0.7360422989491451	0.3520751019371444	1.6841793792081021	2.030868058636755	1.2948257596876098	32.0	52.0	1.568448915572025	0.012487279640888166
1.0361171589285492	0.18898819218053609	1.3023506899015123	2.153173573475531	1.1170564145469817	18.0	77.0	1.9275423742575641	0.012295617871071324
1.4554769860628967	0.13865329899354983	1.3258250940986571	2.6340898357091787	1.178612849646282	16.0	109.0	2.2349067690036684	0.010644171095772873
1.4498701134466263	0.31058130919398663	1.4619967008467738	2.5863701208267376	1.1365000073801113	35.0	110.0	2.275732603635352	0.010784827748548675
0.9600608900821135	0.5645960944495356	1.506729470650258	1.936555250912238	0.9764943608301244	51.0	75.0	1.9831709517154397	0.013170787266274837
1.2738635992732497	0.3599420052974944	1.576766445666371	2.4454827467140463	1.1716191474407966	46.0	110.0	2.0872676518267808	0.009651051001626611
0.993746500936121	0.4042901720992371	1.3834116161012329	1.967122107939293	0.973375607003172	54.0	104.0	2.0209280916702514	0.009759788354751076
1.2725568967434937	0.34403647326183906	1.4920847499685603	2.430983515922386	1.1584266191788923	34.0	100.0	2.098521801618732	0.010693734515125257
1.0954122147303156	0.30437176735437155	1.3897320525813834	2.1764988671048706	1.081086652374555	33.0	88.0	2.0132510768903633	0.011471898921524103
0.8575336261890469	0.8439531203604506	1.7585684724258526	1.7712608202685773	0.9137271940795304	86.0	86.0	1.9385007163466426	0.011103968235088059
1.1675248806708236	0.471809804338718	1.3934462683042717	2.126694305096369	0.9591694244255455	51.0	113.0	2.2172248728321002	0.010165974309588793
0.7364983568391663	0.6637210809853098	1.5677190571945219	1.6955111133270344	0.9590127564878681	56.0	64.0	1.7679755580482555	0.012845286404086213
1.2927262722869781	0.4035873696292991	1.5382297474758022	2.412194170744431	1.1194678984574529	38.0	86.0	2.15476850570549	0.012878289347446979
1.3018909171913946	0.19556835825972474	1.6469215154930121	2.7141996362043344	1.4123087190129398	17.0	67.0	1.9218175174201884	0.0140667366300268
1.453974400779703	0.2732818711901116	1.3396027879718586	2.4799919529997996	1.0260175522200965	27.0	85.0	2.4171048025772985	0.01497976503381325
1.437752227949207	0.3583137766211726	1.4236919850563206	2.46870238175672	1.030950153807513	46.0	118.0	2.3945894693737513	0.010676087628754343
1.559862442458971	0.8425945171215743	2.4093363857691394	2.970561376770667	1.410698934311696	76.0	106.0	2.1057373083081363	0.010135145950216091
1.3369941199125668	0.8348004574799679	2.154755061574972	2.6206510320558554	1.2836569121432886	74.0	100.0	2.0415509839620793	0.010296655966548138
0.9789202669027948	0.5923395710675148	2.033649821562063	2.3913962431479074	1.4124759762451127	57.0	81.0	1.693052684340253	0.009378109477209814
1.0596419265901182	0.4547825164998067	1.8112598651251195	2.4096436145358493	1.350001687945731	49.0	90.0	1.784918964214447	0.009287317522342216
0.837383831379027	0.539566157585346	1.4230018405093254	1.6837390629708342	0.8463552315918071	66.0	87.0	1.9893999589322477	0.011406130482401942
1.2974742354318143	0.6284666189155352	2.3393951982048895	2.9423556113972023	1.644881375965388	50.0	83.0	1.788795018528507	0.010108290068118744
1.1786416418992811	0.37197163705554304	1.4855398580157184	2.3312330638393504	1.1525914219400692	33.0	93.0	2.0226014348739154	0.01092701136164516
0.9279939272242874	0.23930809251316032	1.4872508632068149	2.2026640807058997	1.2746701534816123	23.0	87.0	1.7280267170997772	0.009070408313190264
1.003784789923671	0.1782642944547297	1.21328630122039	2.031669668526728	1.0278848786030572	20.0	80.0	1.976553708317862	0.012287339470275367
0.7919873313373309	0.7187466586034963	1.8466946628706657	2.004972746365384	1.2129854150280532	60.0	71.0	1.6529240348030187	0.010211555248949497
[truncated: 2,372 more rows]
