# Supplementary material for: Initiation of chromosome replication controls both division and replication cycles in E. coli through a double-adder mechanism
Source: eLife journal article supplement (doi:10.7554/elife.48063), 2019-11-11
Supplement: supp [file elife-48063-supp-v1.zip › elife_poa_e48063_Figure_7_source_data_4.csv]

dL	dL_bi	L_b	L_d	L_i	T_bd	T_bi	R_db	lambda
0.40305653786812545	0.1086192654233451	2.3084496321819006	2.711506170050026	2.4170688976052457	22.0	6.0	1.1746005337301488	0.011055723738024627
0.867845192214779	0.6589937869173126	1.5795415869472158	2.4473867791619948	2.2385353738645284	55.0	43.0	1.5494285173536113	0.011698818480473116
0.5930471921649345	-0.38439213191136945	2.5013242399976368	3.0943714321625713	2.1169321080862673	29.0	-5.0	1.2370932894991233	0.010962653514023594
1.2577128740342711	0.250364845594923	1.7942419114973254	3.0519547855315965	2.0446067570922484	62.0	15.0	1.7009717396383235	0.01256326511329766
1.1267100845069185	0.1451916452094104	2.268646143154746	3.3953562276616647	2.4138377883641566	40.0	6.0	1.4966442597963434	0.014916188339290613
1.5078573187399082	0.6981093366505744	1.2497650943650283	2.7576224131049365	1.9478744310156026	108.0	60.0	2.206512588276447	0.010670728766284438
1.208878402674427	0.42831855081315284	1.988720160443345	3.197598563117772	2.417038711256498	57.0	23.0	1.6078675254164125	0.012234795457768689
2.161517480106303	1.0387884556917486	1.0042321735304687	3.1657496536367717	2.0430206292222173	195.0	120.0	3.1524081154533157	0.008538424331627005
1.465121125455599	0.7008884476471438	1.2382434223419876	2.7033645477975865	1.9391318699891313	95.0	54.0	2.1832254458372162	0.011983628879373822
2.588251957449091	1.0675494869751532	1.31467275106113	3.902924708510221	2.382222238036283	109.0	59.0	2.968742377416737	0.01453566577826212
2.6698557779282694	1.0843699105941826	1.3578391829107292	4.027694960838999	2.442209093504912	164.0	88.0	2.9662533026960074	0.00962356933589329
1.7024181024891913	0.7609084911141382	1.286755682217622	2.9891737847068134	2.04766417333176	128.0	70.0	2.3230313462111223	0.009574871035624813
3.583709025598706	1.4023636121587946	1.1060423537974247	4.689751379396131	2.5084059659562192	188.0	106.0	4.240119162972917	0.011144945510187387
0.5466806650664924	0.42550499601533565	1.8094217831974473	2.3561024482639397	2.234926779212783	26.0	20.0	1.3021300341042914	0.015234941079619917
1.2913661545100985	0.7460897032827023	2.002067439077555	3.2934335935876535	2.7481571423602573	67.0	42.0	1.6450163112912373	0.010880331654392197
0.8841531273431071	0.12695442189436235	1.857491831570388	2.7416449589134952	1.9844462534647505	54.0	9.0	1.4759930096681035	0.010597846958159098
1.9278862204168858	0.9016928606609975	1.4582225995207356	3.3861088199376215	2.359915460181733	141.0	80.0	2.322079510391974	0.008681552660086068
0.20952793474336318	0.04668109140970156	2.2087797616359923	2.4183076963793555	2.255460853045694	14.0	3.0	1.094861397402596	0.01005755732515919
0.942044239021397	0.6595546531537968	1.1080855415110755	2.0501297805324725	1.7676401946648723	84.0	63.0	1.8501547973785029	0.01069452990517396
2.2761286755725902	0.7985828298313611	1.5591413900898403	3.8352700656624306	2.3577242199212014	149.0	68.0	2.459860337260007	0.00877416490833452
1.4499593678101927	0.4231781303263862	1.6033259337263885	3.0532853015365813	2.0265040640527747	78.0	28.0	1.9043447357208605	0.012068761915021056
1.3302830421443885	0.4832578140984709	1.71265865472505	3.0429416968694385	2.195916468823521	75.0	32.0	1.7767356551022433	0.011205797991957856
3.283866886547235	1.016940770673986	1.186464104701901	4.470330991249136	2.203404875375887	121.0	56.0	3.7677760106971854	0.01594761000989181
2.6291401272991086	1.0977107954244967	1.713472078224064	4.342612205523173	2.8111828736485607	140.0	74.0	2.534393329609487	0.009652089521132116
0.30556438263478736	-0.46370170284473833	2.1272927899006846	2.432857172535472	1.6635910870559463	17.0	-18.0	1.1436400217616745	0.012102063323614189
0.9437212161276618	0.6179196070367461	1.806233074021774	2.749954290149436	2.42415268105852	51.0	35.0	1.5224803098231194	0.012128471398701454
2.5198643343935663	0.9977475807143421	1.4911443146794527	4.011008649073019	2.488891895393795	142.0	73.0	2.689886290405939	0.010124433950403277
1.9494328351645887	0.7708703857539463	1.5835690001352332	3.533001835299822	2.3544393858891794	88.0	43.0	2.2310375076792432	0.013307066299270597
1.9166303330082335	0.6446769719224976	1.5699856187613976	3.486615951769631	2.2146625906838953	110.0	47.0	2.2207948341082977	0.010560331349672101
3.534751284370043	1.311093634761504	1.5129835467525024	5.047734831122545	2.8240771815140064	140.0	72.0	3.3362787334714263	0.012505322485846754
0.4584787674670392	0.20896132186184158	2.134827472546832	2.593306240013871	2.3437887944086735	26.0	12.0	1.214761508067009	0.011226923996789857
1.9455548785846264	0.6325359767238954	1.734731689845043	3.6802865684296693	2.3672676665689383	76.0	31.0	2.121530718539197	0.01446807424227525
1.6527790530348365	0.9651415021566907	1.3792326614428447	3.0320117144776813	2.3443741635995354	99.0	66.0	2.1983323040695897	0.011596015135540887
2.044181585213156	0.7276456198920207	1.407106954550605	3.451288539763761	2.1347525744426257	128.0	59.0	2.4527549441797882	0.010192150400019492
0.4451845302645445	0.2231720293116033	2.502969289432953	2.9481538196974975	2.7261413187445562	24.0	12.0	1.1778625619355485	0.01026831344056369
0.8936185855126983	0.5138907275203772	2.3514917147020005	3.245110300214699	2.8653824422223777	45.0	27.0	1.3800220004712815	0.010561165154521927
0.9207227114810257	0.42688624425906196	2.094835156954153	3.0155578684351787	2.521721401213215	56.0	28.0	1.4395203643706922	0.009556149060498191
1.4787644418166488	0.4929438746227621	1.173114895234255	2.6518793370509037	1.666058769857017	94.0	40.0	2.260545278066186	0.01265237435171486
1.0974363914243561	0.40235274006905675	1.6295654745715433	2.7270018659958994	2.0319182146406	64.0	27.0	1.6734533889857366	0.01179092647501218
3.0553212341086424	1.128729173352783	1.5251856475077123	4.580506881616355	2.6539148208604955	136.0	68.0	3.0032454666101183	0.011752017752859984
0.7946560599729782	0.4589708967489079	1.3989834672258181	2.1936395271987963	1.857954363974726	66.0	41.0	1.5680239106390441	0.009983808602039375
0.524708574207668	0.17666075262890235	1.647075444891997	2.171784019099665	1.8237361975208994	39.0	14.0	1.318569848050934	0.010499315697624816
2.0915769918882106	0.7821829734811165	1.4046110670430088	3.496188058931219	2.1867940405241253	104.0	50.0	2.4890791059274537	0.01277293283136905
2.045721581803162	0.8198383009289576	1.5451372307425855	3.5908588125457475	2.364975531671543	106.0	53.0	2.3239740400404423	0.011586609078121965
1.2272692253680695	0.41374669659226515	1.9123127694729949	3.1395819948410644	2.32605946606526	82.0	32.0	1.641772227304787	0.008830296141354846
3.6366790726322047	1.3184871905835114	1.2618786286241153	4.89855770125632	2.5803658192076266	147.0	77.0	3.8819563071588306	0.013402629315626424
3.192713800031553	0.8493103776588318	1.626705129892366	4.819418929923919	2.476015507551198	107.0	41.0	2.962687484881052	0.014782136354452293
0.29211352687502234	-0.1349059460681552	3.065878964478486	3.3579924913535084	2.930973018410331	11.0	-4.0	1.095278884215415	0.013129826128480276
0.3702141938779562	0.23436281825893523	2.0328058896020935	2.4030200834800497	2.2671687078610288	24.0	15.0	1.1821197959783671	0.010494619373413507
2.0062110522107055	0.9540244187628233	1.259336023272555	3.2655470754832607	2.2133604420353783	99.0	58.0	2.593070487253509	0.014027157381658226
1.4277120653139024	0.582460083183109	2.0289562615376306	3.456668326851533	2.6114163447207397	58.0	27.0	1.703668231976534	0.013484989756989797
1.2903467819253482	0.8834564762012638	1.0899027287131344	2.3802495106384827	1.9733592049143982	101.0	76.0	2.1839100388792323	0.011269134289977492
1.499651803390746	0.22974766303357974	1.873024431976138	3.372676235366884	2.1027720950097177	62.0	12.0	1.8006578973497616	0.013910231362745632
2.022888224719854	0.783377481743786	1.8835203820213335	3.9064086067411874	2.6668978637651195	87.0	41.0	2.0739932755858765	0.012237339727606626
1.4145810611178755	0.3572283612517595	1.9317357561177888	3.3463168172356643	2.2889641173695483	69.0	21.0	1.7322849704665406	0.011657004131000862
2.645817675982774	0.8294909483508459	1.4933036980602943	4.139121374043068	2.32279464641114	121.0	52.0	2.7717880692450714	0.012256807944274218
0.30609142820168933	0.1456537473545627	1.4350047048776347	1.741096133079324	1.5806584522321974	23.0	11.0	1.213303431801494	0.012679108877977506
0.4237935959095891	0.22821611586687163	1.651369776505673	2.075163372415262	1.8795858923725446	31.0	17.0	1.256631556383661	0.010985390481317343
2.176988906784557	0.9604602594860219	1.5847222748649865	3.7617111816495434	2.5451825343510084	105.0	57.0	2.373735285553445	0.011991914012900525
1.3862964449112098	0.624304111034339	1.7075627056130687	3.0938591505242785	2.3318668166474077	104.0	54.0	1.8118568298278017	0.008324941362321118
1.2164715216976152	0.5393969491796011	1.822510752772852	3.038982274470467	2.361907701952453	72.0	36.0	1.6674701478972451	0.010389590614142189
2.3831342631351804	1.1233957015121816	1.2185807279061356	3.601714991041316	2.341976429418317	142.0	85.0	2.9556638379059836	0.011088526198980802
1.985518785485244	0.877144061580079	1.7241922902028748	3.709711075688119	2.6013363517829537	137.0	73.0	2.151564588687275	0.008127839336632334
1.6192568630958235	0.8691522140272487	1.0905467194308522	2.7098035825266757	1.959698933458101	133.0	85.0	2.484812006899531	0.009948005349426406
1.7116445431592506	0.7071037905083886	1.5573506522113028	3.2689951953705534	2.2644544427196913	104.0	52.0	2.09907459872885	0.010385955721218317
0.14406375289011608	0.04702895190868128	2.244454439403909	2.388518192294025	2.2914833913125903	7.0	2.0	1.0641865347591448	0.014958509034748152
0.5488719832166467	-0.1041431133001427	1.945775404853215	2.4946473880698616	1.8416322915530723	37.0	-8.0	1.2820839352001432	0.00995807541951594
0.4230332491823865	-0.21183509830369296	2.5938536645086456	3.016886913691032	2.3820185662049527	25.0	-10.0	1.1630906380613117	0.009081813685070524
2.1085972823207597	0.8545457971963666	1.9856030968807672	4.094200379201527	2.840148894077134	94.0	46.0	2.0619429863063807	0.011225854215708925
1.0255154729613014	0.5428038734462028	1.9179770517399939	2.9434925247012953	2.4607809251861967	56.0	32.0	1.5346859974320084	0.011235336453073508
2.316392919382422	0.6832975238751078	1.540668731202869	3.8570616505852913	2.223966255077977	101.0	40.0	2.503498365657042	0.013239455135965396
0.7939772517104373	0.28948723313892355	1.4148153508586083	2.2087926025690456	1.7043025839975319	68.0	28.0	1.5611878972253141	0.009591704235054363
0.47104546905882905	-0.10132076613037899	1.862827062311202	2.333872531370031	1.761506296180823	28.0	-10.0	1.252865914710518	0.012045630428760628
0.18051715572030114	0.052595620472086324	2.0926073587484297	2.273124514468731	2.145202979220516	11.0	3.0	1.0862642267626674	0.01193750720873544
1.0377624790028368	0.38774547562996764	2.512710324327996	3.5504728033308326	2.9004557999579634	54.0	22.0	1.4130052194856078	0.009410694242230703
1.6802860764688659	0.7360464666166513	1.3594342158524617	3.0397202923213276	2.095480682469113	107.0	57.0	2.2360186737062575	0.010952190911684628
1.5102346864223488	0.5147996021622125	1.7707709477399804	3.2810056341623293	2.285570549902193	88.0	36.0	1.8528684572953087	0.010227131749233011
1.7703270372637108	0.8515144889852007	1.3723795560168135	3.1427065932805243	2.223894045002014	116.0	67.0	2.2899689663127143	0.010394156930730146
2.0293385152204624	0.9523617437455467	1.3421742339076839	3.3715127491281462	2.2945359776532306	147.0	85.0	2.5119784480679	0.009101534838652838
0.9078165383402663	0.20320715278863877	1.80164509467308	2.7094616330133463	2.0048522474617188	43.0	11.0	1.503882002634373	0.01401646130792319
0.27072496343583174	0.13088868484844451	1.9146877161835965	2.185412679619428	2.045576401032041	15.0	7.0	1.1413937955247593	0.013628330416917222
0.9064565842214618	0.6154937346548996	1.0636038955391465	1.9700604797606083	1.6790976301940461	109.0	80.0	1.8522501544261214	0.008234064388760702
2.232914060130148	0.7271260940533908	1.9402462847391886	4.173160344869337	2.6673723787925794	78.0	32.0	2.150840528696232	0.014349357947513889
0.8854780231291426	0.24139507396285254	2.1119634838708445	2.997441506999987	2.353358557833697	56.0	17.0	1.4192676766864465	0.00918448563989309
0.3519211607476791	-0.25202087031412734	2.4103476875324397	2.7622688482801188	2.1583268172183123	17.0	-3.0	1.1460043140531122	0.012288279689352907
3.1907516351176533	1.3158820162276328	2.118399833766066	5.309151468883719	3.434281849993699	117.0	61.0	2.506208405164559	0.011426779204851342
2.5058771200179866	0.9063390778036877	1.4346560027746633	3.94053312279265	2.340995080578351	131.0	63.0	2.7466745444005762	0.011212969034501183
2.177541452277496	0.8457356222748531	1.186164933481744	3.36370638575924	2.031900555756597	123.0	63.0	2.835783027142583	0.012325796332716755
2.5455195390518033	0.7391151736701276	1.7546700281365815	4.300189567188385	2.493785201806709	103.0	40.0	2.4507112438428584	0.012678436353183425
0.2063726589504853	-0.06816834518308035	2.132235347376341	2.3386080063268264	2.064067002193261	11.0	-7.0	1.0967869983041136	0.01332833741205873
0.9804587644948031	0.1348361942353784	1.9921807680786716	2.9726395325734747	2.12701696231405	56.0	9.0	1.492153513478795	0.010498108516287213
1.888824968028978	0.532064309493459	2.064851261625088	3.9536762296540657	2.5969155711185468	69.0	24.0	1.9147511024801016	0.01378171866389591
1.1228741260208865	0.1855951097025934	1.7119507760309776	2.834824902051864	1.897545885733571	50.0	10.0	1.6559032781445862	0.014849355245022336
1.5551849986988753	0.49251094945397433	1.9611505304704924	3.5163355291693676	2.4536614799244667	87.0	33.0	1.7929962410003155	0.00979502864666196
0.9628394663083086	0.17522751030093975	1.959621283810912	2.9224607501192206	2.1348487941118517	43.0	9.0	1.491339563548655	0.013728780540156726
1.1976805590869586	0.2969885935877583	2.181089319033451	3.3787698781204094	2.478077912621209	49.0	14.0	1.5491203632218558	0.013155192556092125
1.0569293183590645	0.39393447430849426	1.1361305448593335	2.193059863218398	1.5300650191678278	96.0	43.0	1.9302886214452801	0.009987542935688105
3.7472768841500628	0.9838833920353127	1.4127766974954783	5.160053581645541	2.396660089530791	126.0	51.0	3.6524197991042078	0.01495082075407547
3.2972651466228307	1.0551989829535233	1.1747463313814448	4.4720114780042755	2.229945314334968	147.0	70.0	3.806789056106612	0.01320941526508375
1.031093987650279	0.21127325292413013	1.8321991309874555	2.8632931186377344	2.0434723839115856	46.0	11.0	1.562763058999256	0.014313312405236882
1.2392677676795545	0.4976266577666064	1.8077761068182738	3.0470438744978283	2.3054027645848802	74.0	34.0	1.685520603467148	0.010317729625286128
1.9086609282522686	1.141009203854121	1.1568506096544775	3.065511537906746	2.2978598135085986	143.0	100.0	2.6498767535959877	0.009900882120728734
0.4280174046141494	-0.041587778110235174	2.075917032366175	2.5039344369803245	2.03432925425594	21.0	-7.0	1.20618232710692	0.01352240011028967
1.7567653130353253	0.7123524419453136	1.279035609123997	3.0358009221593223	1.9913880510693105	124.0	63.0	2.3735077432586276	0.01013838013316203
1.6330654243317435	0.6158721065464439	1.5878789393653878	3.2209443636971313	2.2037510459118317	83.0	38.0	2.028457134763948	0.012443692877074693
2.0136166839138774	0.7377780768699171	1.9161233084813563	3.9297399923952336	2.6539013853512734	87.0	39.0	2.050880533106082	0.01204934250112235
2.6827705122774743	1.024177749065841	1.3273445945757458	4.01011510685322	2.351522343641587	146.0	75.0	3.0211560157330197	0.011000694402117277
3.278071703317506	1.0594890617605663	1.2137732876145997	4.491844990932106	2.273262349375166	172.0	82.0	3.700728164614517	0.011039819690001644
2.3039692696435794	0.8878840164371078	1.7126379960352174	4.016607265678797	2.600522012472325	101.0	49.0	2.3452751106639598	0.012297571668816449
1.0016836324765932	0.3777870298781649	1.618298684783591	2.619982317260184	1.9960857146617559	63.0	27.0	1.6189732722983363	0.011210954327751186
1.6511932334692958	0.32126751690791444	1.4525741865170134	3.1037674199863092	1.7738417034249279	96.0	25.0	2.136735905674141	0.011530616906495485
1.142899379212789	0.39981350416142236	1.2249029370593902	2.3678023162721793	1.6247164412208126	78.0	33.0	1.9330530155773271	0.012349106560988891
1.198679411414318	0.4567191435111049	1.448199740744477	2.646879152158795	1.904918884255582	78.0	35.0	1.8277030976390811	0.011299113375849554
1.7833990001386664	0.857424930987577	1.4249450975499813	3.2083440976886477	2.2823700285375583	144.0	83.0	2.251556290277431	0.008188269555137075
3.041173719866971	0.9243843209048419	1.6571608095280463	4.698334529395018	2.5815451304328882	135.0	57.0	2.835171156825201	0.011219670388400025
0.9330882387156381	0.3948633857123389	2.424305028515459	3.357393267231097	2.8191684142277977	42.0	19.0	1.3848889589966413	0.01145781231686261
0.022152863122598898	-0.5063099688071189	2.4478847922103095	2.4700376553329084	1.9415748234031907	2.0	-18.0	1.0090497980922526	0.012997375324269467
2.0677458588698405	0.7623185718869894	1.4896923663271036	3.557438225196944	2.252010938214093	100.0	47.0	2.3880354800823413	0.012685093651616138
1.1445132617237088	0.5353698087398091	1.3430656231666047	2.4875788848903135	1.8784354319064138	80.0	43.0	1.8521648101045425	0.011255854162077784
1.7161627777179629	0.46838140758444946	1.1729350412193702	2.889097818937333	1.6413164488038197	111.0	41.0	2.4631353974503645	0.011822690311975305
2.0725979628922406	0.7887251872290155	1.3920552465655474	3.464653209457788	2.180780433794563	131.0	64.0	2.4888762267199636	0.010119188354070247
2.3276023903630114	1.1235594244095521	1.7612875822498801	4.0888899726128916	2.8848470066594323	100.0	58.0	2.321534548826897	0.012273522738347694
0.8478498048870184	0.11444346546574158	2.7869168810836076	3.634766685970626	2.901360346549349	34.0	5.0	1.3042250060064073	0.011611902606537777
1.6686053381960668	0.4055368935073109	1.5612759933972813	3.229881331593348	1.9668128869045922	86.0	27.0	2.0687446327572365	0.012338300810973726
0.8064414798873754	0.20564559582434727	1.700718237190553	2.5071597170779283	1.9063638330149002	52.0	15.0	1.47417700489856	0.010978622738874485
0.9899938710107032	0.23877895423251294	2.0846378185387664	3.0746316895494696	2.3234167727712793	44.0	12.0	1.4748996982625224	0.013037601073871927
1.2412379640862947	0.5139386385060343	1.5936497655597326	2.8348877296460273	2.107588404065767	69.0	33.0	1.7788649619951713	0.012219955827068377
2.193730448724245	0.8215706632900017	1.7117461996862315	3.905476648410476	2.5333168629762333	102.0	48.0	2.281574598574463	0.011782473515301534
1.7303947895414824	0.7984460622122367	1.1381025617838465	2.868497351325329	1.9365486239960832	121.0	69.0	2.520420784247498	0.01111387176473948
3.2132962955773525	1.4973393925711111	1.3295474942431798	4.542843789820532	2.826886886814291	159.0	97.0	3.416834531666326	0.01121936951596414
0.34813030798093525	-0.4100088513659901	2.5107631905445746	2.85889349852551	2.1007543391785846	18.0	-22.0	1.1386551743676898	0.011019465492753842
0.8204471764830497	0.32487840241168486	1.9380758382524519	2.7585230147355015	2.2629542406641368	42.0	18.0	1.4233307904105759	0.012421243697755756
1.0113536812599853	0.5345584001377703	1.9560197512794415	2.9673734325394268	2.490578151417212	70.0	40.0	1.5170467632540285	0.00871399358867349
1.719791754252008	0.5677081888174393	1.6991029061489662	3.4188946604009742	2.2668110949664055	115.0	47.0	2.0121763361290066	0.008848743338478007
0.55222687336112	0.0873526258078674	2.2018933483722796	2.7541202217333995	2.289245974180147	31.0	-9.0	1.2507963765680779	0.010761564834616452
1.3659248987780512	0.12160021077122884	2.045328222396331	3.4112531211743824	2.16692843316756	63.0	7.0	1.66782674967332	0.011902732781394034
1.9844515452735185	0.41538543470105194	1.7081431366935063	3.692594681967025	2.123528571394558	86.0	24.0	2.1617595168955623	0.01308477694837923
2.0992184163618735	0.9089465951906648	1.7279070145002489	3.827125430862122	2.6368536096909136	112.0	59.0	2.2148908469875135	0.01033545587785299
1.8569592540915019	0.49689311551371373	2.17616286040156	4.033122114493062	2.6730559759152737	79.0	26.0	1.8533181444649982	0.011411673829093213
3.9950522869500347	1.2060027913252025	1.3773307618975519	5.3723830488475866	2.5833335532227544	146.0	67.0	3.9005758075467956	0.013542669738064953
0.2698438675367534	-0.2510998783390448	2.019699785349871	2.2895436528866244	1.7685999070108263	23.0	-11.0	1.1336059297000958	0.008223600449138533
2.139980657516216	0.5926930442446472	1.251605398074491	3.391586055590707	1.8442984423191382	109.0	42.0	2.709788612935378	0.013316484381628083
2.762286001377409	0.910865122784341	1.3622163600342423	4.124502361411651	2.2730814828185832	120.0	55.0	3.0277880096139596	0.013430791585357307
2.6211017245018344	0.5197643046089997	2.1900260088447046	4.811127733346539	2.7097903134537042	86.0	23.0	2.196835888668068	0.013357965875484448
2.4823346546229565	0.6896956484039858	1.1334732647160162	3.6158079193389727	1.823168913120002	145.0	59.0	3.190024883599604	0.011621997761742942
0.6479677301676996	0.03134129006627573	1.8492528875126455	2.497220617680345	1.8805941775789212	39.0	-3.0	1.350394331972224	0.011404756677044568
1.510210734020593	0.22631630185186324	2.8194925879372223	4.329703321957815	3.0458088897890856	51.0	9.0	1.5356320993649013	0.012376652446227975
0.9171901040459662	0.4238428111226735	1.8279275056320818	2.745117609678048	2.2517703167547554	79.0	40.0	1.5017650323768226	0.007521270577363079
1.075125877523164	0.3912705417633999	1.5091816533846025	2.5843075309077665	1.9004521951480025	64.0	27.0	1.7123899731433967	0.012317639571548085
2.2097433795530224	0.6162523205298285	1.8491693876886568	4.058912767241679	2.4654217082184853	83.0	30.0	2.194992408086022	0.013831901827540426
0.9606618115516066	0.4720751275086481	1.518140138945918	2.4788019504975245	1.990215266454566	68.0	37.0	1.6327886253100572	0.010557284135819748
0.9446383201902455	0.3232473277476988	1.7189826473867387	2.663620967576984	2.0422299751344375	62.0	24.0	1.5495333659279922	0.010357931486048048
2.990760279450391	1.04186737673859	1.4352848290285043	4.426045108478895	2.4771522057670943	131.0	63.0	3.0837399092936386	0.012497546843869672
1.4294615772750892	0.432298612483333	1.1389832306221448	2.568444807897234	1.5712818431054778	140.0	55.0	2.2550330319562977	0.00843991774374896
1.188241692384505	0.4780210159066516	2.238355151594064	3.426596843978569	2.7163761675007154	45.0	20.0	1.5308548518488179	0.013962215910272135
0.5373557473441997	0.05625545187024583	2.2333094653918573	2.770665212736057	2.289564917262103	27.0	3.0	1.240609622477875	0.011963431537250883
1.3278151904349313	0.4848155951809099	1.84393086597094	3.1717460564058713	2.32874646115185	80.0	34.0	1.7201003112097466	0.009904970900353876
1.1354402210248107	0.4933219363149084	1.6355679119453395	2.77100813297015	2.128889848260248	55.0	27.0	1.6942177165082197	0.014085542240973739
1.3958218611830207	0.5452640370511759	1.5194938946672663	2.915315755850287	2.064757931718442	69.0	32.0	1.918609720040154	0.013824430457084487
1.7352676919385852	0.3218600492231485	1.8328996167052518	3.568167308643837	2.1547596659284003	71.0	17.0	1.946733621483229	0.013729364120658913
1.6993282905515001	0.34830553180146007	1.7792477079805504	3.4785759985320506	2.1275532397820105	61.0	16.0	1.9550824671176568	0.016120491049605303
1.6483714072888922	0.7908805783453638	1.4936048974907583	3.1419763047796505	2.284485475836122	106.0	60.0	2.1036194445118253	0.01021784511754758
1.6403643244599744	0.8685500775049229	1.362231934231581	3.0025962586915553	2.230782011736504	134.0	83.0	2.2041740347140553	0.00857321909106478
1.7137697743067932	0.41525972353945595	1.121832306687456	2.8356020809942493	1.537092030226912	107.0	36.0	2.527652363094453	0.012620736398521399
1.8988735414991316	0.9478684788395626	1.6223111013934866	3.521184642892618	2.570179580233049	97.0	57.0	2.1704743559161317	0.011645941430172137
2.101727357940091	0.9594314719936601	1.4670122067596179	3.5687395646997087	2.426443678753278	107.0	60.0	2.4326583979709695	0.012099374966376052
2.0845899617899892	0.853302816663809	1.7572231896908364	3.841813151480826	2.6105260063546454	84.0	42.0	2.1862977759568207	0.013596263986851447
0.7233370628938878	0.409657555271576	1.6634303790453138	2.3867674419392015	2.0730879343168898	42.0	25.0	1.4348466109588727	0.012704793099615905
0.8009198841227074	0.21100579399917763	1.9954800143429678	2.7963998984656753	2.2064858083421455	48.0	14.0	1.4013670286677455	0.01035818846907772
0.9646010327479742	0.336756535789144	1.7860611971727556	2.7506622299207297	2.1228177329618996	56.0	22.0	1.5400716583927183	0.011327226909323692
1.852720173054617	0.6341219945355911	1.6256478019919123	3.4783679750465293	2.2597697965275034	98.0	42.0	2.1396811602023957	0.011313359099698052
2.33937332153958	1.0176333617756048	1.6808036436677047	4.020176965207285	2.6984370054433096	106.0	57.0	2.3918183306854344	0.01198197918616675
2.8922440541937786	0.9466506855621408	1.1626364715194097	4.054880525713188	2.1092871570815506	152.0	72.0	3.4876598361085334	0.011935492289988905
3.5560370870763434	1.202404375490281	1.1439314755203764	4.69996856259672	2.3463358510106573	180.0	91.0	4.108610229872988	0.011389108789598167
0.3690615106793258	-0.27640977657570076	2.4741073077464955	2.8431688184258213	2.1976975311707947	19.0	-21.0	1.1491695649270282	0.011143982753793085
1.1923458969938197	0.5533971208278863	1.4030612110606926	2.5954071080545122	1.9564583318885789	112.0	60.0	1.8498174474458065	0.007994440565922996
1.7799209282996329	0.8106491365856439	1.134762895946289	2.914683824245922	1.9454120325319328	120.0	68.0	2.5685399431529183	0.011436542093201562
2.1232517254661856	1.0359431795018008	1.057260094044598	3.1805118195107833	2.093203273546399	130.0	80.0	3.008258646501625	0.01231727607405097
2.360881734379813	0.8508523165983564	1.3133316291783974	3.67421336355821	2.1641839457767538	139.0	67.0	2.797628018641985	0.010755102536350567
2.1624916263130647	0.8843235802633655	1.0137057021105291	3.176197328423594	1.8980292823738947	123.0	67.0	3.133253884052117	0.013505423560723909
1.9471042808344938	0.773379937099612	1.586366735109189	3.533471015943683	2.359746672208801	122.0	60.0	2.227398581766451	0.009548427638379453
0.7993419029514393	0.5227256452311664	1.7960593188327005	2.59540122178414	2.318784964063867	50.0	34.0	1.445053175343312	0.010839236372877412
1.2832062550771626	0.5671049459922342	1.6381972062040793	2.921403461281242	2.2053021521963134	73.0	37.0	1.7833038966355719	0.011591008009229919
1.1582137448411443	0.38892307099094836	1.6989723521888553	2.8571860970299996	2.0878954231798037	59.0	23.0	1.6817142982632827	0.012929872948036802
1.7929374393240178	0.8546454782894326	1.4391254522803614	3.232062891604379	2.293770930569794	152.0	87.0	2.2458520808474516	0.007730217948745682
1.967442974701468	0.7408372207927025	1.6201440245293097	3.5875869992307776	2.3609812453220123	77.0	36.0	2.214363010271915	0.01509068090596893
1.4677387380523668	0.6324016551353948	1.1896856581311497	2.6574243961835164	1.8220873132665445	116.0	61.0	2.233719788097643	0.010082158403515897
1.8598634911782022	0.7932388996329129	1.5588347713617694	3.4186982625399716	2.3520736709946823	106.0	55.0	2.19311137097196	0.010790276924458525
4.074113399246932	1.1080030380962695	1.412692685261016	5.486806084507948	2.5206957233572855	158.0	67.0	3.8839346602082667	0.012468273441842497
0.862746254227164	0.3314855167966775	1.7279624875978967	2.5907087418250607	2.059448004394574	61.0	26.0	1.499285291445475	0.009737915542994437
1.0993390580094442	-0.004815481130370891	1.9973669636315863	3.0967060216410305	1.9925514825012154	46.0	-3.0	1.5503941328891515	0.014058555918391332
1.1304144053112417	0.5166660087635202	1.5935024432073253	2.723916848518567	2.1101684519708455	85.0	44.0	1.7093898162063672	0.009208112292593332
2.039734173531973	0.7834541654543932	1.64364016422729	3.683374337759263	2.427094329681683	119.0	57.0	2.240985842233233	0.00986553842739946
2.581859163896514	0.8088144898376068	1.6021525794581715	4.184011743354685	2.4109670692957783	102.0	43.0	2.611493934472625	0.01371163715713893
2.306865353548774	0.4987456796832961	1.2801217662989082	3.586987119847682	1.7788674459822043	120.0	38.0	2.802067126956516	0.012491525358931051
2.409885477382611	0.5046019589728084	1.6920122730035265	4.101897750386137	2.196614231976335	96.0	28.0	2.4242718660100335	0.013447910490136989
1.3958865129876028	0.5981537815638538	1.79271384407177	3.188600357059373	2.390867625635624	79.0	39.0	1.7786443539796302	0.010651000867117856
3.4614556677166144	1.0091034128036147	1.961042530235303	5.422498197951917	2.9701459430389177	99.0	40.0	2.765109942465796	0.01497282493917672
3.7635232735989073	0.9307991074529545	1.1127668053564905	4.876290078955398	2.043565912809445	159.0	65.0	4.382131148667047	0.013491345962230547
2.2480387187194437	0.992888466744915	0.856966977047621	3.1050056957670646	1.849855443792536	175.0	104.0	3.6232501122321796	0.010674048265398958
1.6715859802548008	0.7582482557689478	2.5361104551798648	4.2076964354346655	3.2943587109488126	61.0	31.0	1.6591140290600037	0.012173550742087254
0.7572827497201347	0.33078441680611337	1.8628580835094855	2.62014083322962	2.193642500315599	49.0	23.0	1.4065166082289373	0.010252637253731989
2.1591821709660692	0.26900130426222413	2.153511844582991	4.31269401554906	2.422513148845215	60.0	10.0	2.002633060225483	0.016981323767532315
1.996858170565631	0.6053016827776485	1.8835574987742159	3.880415669339847	2.4888591815518644	84.0	32.0	2.0601524890347913	0.012563266593132266
1.1953057576874309	0.23469246528645815	2.0901611688729944	3.2854669265604253	2.3248536341594526	52.0	12.0	1.5718725309263757	0.012793808406987633
2.245859227063613	0.7916037339462147	1.402847766740818	3.648706993804431	2.1944515006870327	95.0	44.0	2.6009286825763933	0.014670498310084039
1.4986998003813277	0.38279320658869187	1.8680953772094173	3.366795177590745	2.250888583798109	80.0	25.0	1.8022608581260464	0.010757061279189725
1.6551624327676442	0.8129848267164981	1.5439801553097507	3.199142588077395	2.356964982026249	94.0	54.0	2.0720101725890308	0.011301409526790608
3.0905459880997794	1.113192566247606	1.3103625995564523	4.4009085876562315	2.4235551658040584	133.0	67.0	3.358542581378548	0.013241176668773726
1.7726337505171743	0.7001010907168068	1.2357265108269686	3.008360261344143	1.9358276015437754	112.0	56.0	2.434487109393565	0.01156412487890709
1.1946382219424445	0.6392458821537843	1.33276861123859	2.5274068331810344	1.9720144933923742	99.0	60.0	1.8963583114643014	0.00942073043961907
2.0254029109855	0.48662123395374035	1.3248233428901754	3.3502262538756753	1.8114445768439158	87.0	29.0	2.528809800835009	0.015563471299736339
1.8055559249102378	0.8741965583101439	1.4889178505913816	3.2944737755016194	2.3631144089015255	99.0	57.0	2.2126632266468502	0.011691672303508455
1.9050827203313172	0.7985085562063385	1.780775677134531	3.6858583974658483	2.5792842333408696	109.0	55.0	2.0698049983458953	0.009717544945511978
1.291701403623799	0.47393871481162453	1.4973116210500965	2.7890130246738956	1.971250335861721	96.0	42.0	1.8626804103195975	0.009446106998807286
1.9469900746145035	0.5130001091589222	1.8255920533653947	3.772582127979898	2.338592162524317	86.0	29.0	2.0664978909309544	0.01231985754467928
1.6213813666126367	0.5696197706835999	1.638102376683813	3.2594837432964496	2.207722147367413	84.0	36.0	1.9897924511256577	0.011959252478553327
2.844333685055659	1.2542425643932624	1.5212553155247006	4.36558900058036	2.775497879917963	136.0	77.0	2.8697280174002953	0.0112660297028364
1.9099737576215865	0.7226685337589009	1.6950032615773811	3.6049770191989676	2.417671795336282	86.0	40.0	2.126826007310542	0.01280825897933242
0.6839355188840688	0.3950998300088877	1.322372039699523	2.006307558583592	1.7174718697084108	60.0	37.0	1.5172035541824345	0.010193468752346694
1.7383367252974211	0.898847105909593	1.4753402868940064	3.2136770121914275	2.3741873928035995	91.0	55.0	2.178261544634624	0.012479746548437956
1.8451733824422702	0.5981770140959779	1.8637750043455767	3.708948386787847	2.4619520184415546	90.0	36.0	1.9900193843892449	0.011154859369071254
0.7397822322659575	0.15136544132727248	1.5862837398526506	2.326065972118608	1.737649181179923	64.0	15.0	1.466361858020858	0.008765732779429316
0.8912676945205749	0.14683030156240484	2.2758028152466094	3.1670705097671843	2.4226331168090143	38.0	7.0	1.3916278196641547	0.012885768240383762
1.0031948243591875	0.578777138528974	1.6379989776174881	2.6411938019766756	2.216776116146462	61.0	38.0	1.6124514349931771	0.011487595150537664
1.6736742767269979	0.5594878383706083	1.3785191407467803	3.052193417473778	1.9380069791173886	92.0	39.0	2.214110292164913	0.0126013965860048
1.6788196561878665	0.48326453276044834	1.1989751300858695	2.877794786273736	1.6822396628463179	107.0	41.0	2.400212242990921	0.011916622493604513
2.0887766732808988	1.0324223909094934	1.4033785937004477	3.4921552669813467	2.435800984609941	125.0	75.0	2.4883914309774275	0.010606560026701229
1.1818635411026654	0.8540298306749359	1.8630506266770366	3.044914167779702	2.7170804573519725	70.0	53.0	1.6343700617576098	0.010271517134334088
0.498559220620864	-0.07017355093866096	2.0973911529414604	2.5959503735623244	2.0272176020027994	25.0	-5.0	1.2377044548517646	0.012819452577853779
0.9876056679490834	0.46239944183770554	2.297452682301572	3.2850583502506554	2.7598521241392775	40.0	20.0	1.4298698621987318	0.013227790972047595
1.608864323900505	0.870856609853403	1.784070662585395	3.3929349864859	2.654927272438798	77.0	47.0	1.9017940587448543	0.012202118792931463
0.7875959292587318	0.3371097705280577	1.8630150618256085	2.6506109910843403	2.200124832353666	54.0	25.0	1.4227533879876149	0.009597841791492565
0.7592546276425489	0.3400281132546472	1.9733624975949797	2.7326171252375286	2.313390610849627	44.0	21.0	1.3847517263391216	0.010921565978560893
1.410009161845881	0.7090537899818099	1.574247558889317	2.984256720735198	2.283301348871127	87.0	50.0	1.895671810881313	0.010729176960030071
1.9948980826277962	0.8135375235612159	1.493214831889961	3.488112914517757	2.306752355451177	120.0	61.0	2.335975266266847	0.010285924359495551
2.058937299029629	0.9869716215567537	1.5267152269889572	3.585652526018586	2.513686848545711	126.0	73.0	2.3486059892717117	0.009854437614837779
1.8965668035165837	0.7681956268797707	1.0873169050376725	2.983883708554256	1.8555125319174433	137.0	72.0	2.744263144194261	0.010708961959482247
2.307919411321207	0.8433371398483311	1.4244091662913343	3.732328577612541	2.2677463061396654	117.0	56.0	2.620264363595908	0.01198027909853448
0.8852138592743282	0.3282436876211914	1.5374715289963226	2.4226853882706507	1.865715216617514	48.0	20.0	1.5757595133174302	0.0139584547388726
2.2912173349649985	1.127665472062023	1.503434108898422	3.7946514438634202	2.631099580960445	135.0	81.0	2.5239891934098737	0.009967953234032503
1.0766303929544072	0.44585793002608853	1.650091868254237	2.726722261208644	2.0959497982803255	64.0	30.0	1.652466940579169	0.011501927132042726
1.2345547798276444	0.3571713431020269	1.5120171253432022	2.7465719051708466	1.8691884684452291	77.0	27.0	1.8164952361550941	0.011331020818713174
2.563677632908231	0.8603175634236366	1.4480289374217914	4.0117065703300225	2.308346500845428	119.0	54.0	2.770460221238981	0.012458691972186409
2.47858302606012	0.6254508640980718	1.762607597159832	4.241190623219952	2.388058461257904	134.0	46.0	2.4062023958446397	0.0095244962315051
2.7143195846451187	1.2227369790730063	1.8613110437305636	4.5756306283756825	3.08404802280357	115.0	64.0	2.458283715549712	0.01138290727810481
2.6015619062508435	0.9766752169322712	1.0747687787461515	3.6763306849969952	2.0514439956784227	157.0	82.0	3.4205782282640196	0.011373334773609887
1.7874021079390632	0.905034434314548	1.260475093947806	3.047877201886869	2.165509528262354	125.0	76.0	2.4180384178325354	0.010272880373634722
0.07006173765687862	-0.01410847460924991	2.55388865382459	2.623950391481469	2.5397801792153403	4.0	-4.0	1.0274333564041476	0.013014939249309491
1.4167687254734724	0.7713925916950679	1.3807154810150657	2.797484206488538	2.1521080727101336	106.0	66.0	2.026112001316811	0.009702037399914817
1.6491924711359336	0.7608067284188893	1.8278341554597741	3.4770266265957077	2.5886408838786634	86.0	46.0	1.902265922873673	0.010914340453169755
1.3889915278986387	0.46748416864476927	1.6048137260457576	2.9938052539443962	2.072297894690527	101.0	41.0	1.8655157326707927	0.008995745270538676
2.3747615256968344	0.9025476711661509	1.5014700585475338	3.876231584244368	2.4040177297136847	136.0	67.0	2.5816242969201064	0.010135400451149024
1.1809203514859612	0.15343080853618085	1.2551722423758513	2.4360925938618125	1.4086030509120322	70.0	12.0	1.9408432656626133	0.013864979953235086
1.4836616536366047	0.34993255634387643	1.7711299542124486	3.2547916078490533	2.121062510556325	55.0	16.0	1.837692146817273	0.016257316745264375
1.0405940696905618	0.3372485015414872	2.0825041246449154	3.123098194335477	2.4197526261864026	55.0	20.0	1.4996840377773522	0.010827010690545157
0.6443010976742354	0.16816494095313006	1.9781261085980706	2.622427206272306	2.1462910495512006	35.0	-2.0	1.3257128526203326	0.01196377422778051
0.7658984325074756	0.338778086623988	1.7969838558122353	2.562882288319711	2.1357619424362233	38.0	18.0	1.4262133073873888	0.013842966766171555
2.1233445555637704	1.2093227848650019	1.260302610290409	3.383647165854179	2.469625395155411	139.0	94.0	2.684789461060064	0.010324702592102771
1.5931762265929195	0.6907605219840514	1.572870204381578	3.1660464309744976	2.2636307263656295	99.0	51.0	2.012910170308252	0.0102988039884393
2.1598670563594737	0.6463801969059386	1.2539278656293107	3.413794921988784	1.9003080625352493	107.0	44.0	2.722481105622051	0.013631339966821475
1.618159851293743	0.4200604828090264	2.359685604022085	3.977845455315828	2.7797460868311115	52.0	16.0	1.6857523089243707	0.014772403405558257
0.7781847770246508	0.0007046207665657445	1.590585778878816	2.368770555903467	1.5912903996453818	51.0	0.0	1.4892441434835306	0.01149160571265026
1.1713225053016851	0.42547378987942497	1.5546382657168587	2.725960771018544	1.9801120555962837	66.0	28.0	1.753437330813144	0.01246439797679408
3.1931565372979143	0.709224300282608	1.5113568384470448	4.704513375744959	2.220581138729653	122.0	41.0	3.1127747306711226	0.013538852675655745
1.311569315252522	0.41096139804589416	1.4558445794546089	2.767413894707131	1.866805977500503	94.0	36.0	1.9008992675192462	0.009964323469850725
3.406799194263782	1.1605316759764017	1.5271482554170421	4.933947449680824	2.687679931393444	140.0	67.0	3.2308241404718325	0.012171958448005272
1.2901767437799747	0.591807481962126	1.0537589356547157	2.3439356794346904	1.6455664176168416	114.0	63.0	2.2243566342603485	0.010206974477457567
0.5455220062728734	0.39841531045050216	2.3806145390048434	2.926136545277717	2.7790298494553456	29.0	21.0	1.2291517578065851	0.01063082320489758
0.1369262775282265	-0.24519614240862664	2.602366320644514	2.7392925981727405	2.3571701782358874	7.0	-6.0	1.0526160657867394	0.0123298865941985
0.6002045212979596	-0.13735925225071277	2.040172654999357	2.6403771762973167	1.9028134027486443	36.0	-13.0	1.2941930036299545	0.010630079519584603
2.2095973004817795	0.8920795325021109	1.1770279111930277	3.3866252116748075	2.0691074436951387	149.0	79.0	2.8772683973501922	0.010302025708331075
1.2852043767549706	0.4958469490106041	1.4424683928883746	2.727672769643345	1.9383153418989787	70.0	32.0	1.8909757628598702	0.013320737275354775
0.9502195816810604	0.3643403204100477	1.9571840750366603	2.9074036567177206	2.321524395446708	52.0	22.0	1.4855034300558887	0.011195136007601556
0.9549518455304629	0.3925766872342069	1.338304662829081	2.2932565083595438	1.7308813500632878	68.0	32.0	1.7135534023409607	0.0115968828908194
0.3287471997506284	0.053258278378714774	2.1762958686928013	2.5050430684434297	2.229554147071516	21.0	-1.0	1.1510581371218112	0.01014803511482591
0.39767297893903564	0.1677159081104993	1.4493749795686581	1.8470479585076938	1.6170908876791574	32.0	14.0	1.2743754960206262	0.011283562315387767
1.6620294006852503	0.7110266653354165	1.3070699715830125	2.969099372268263	2.018096636918429	120.0	63.0	2.2715688041339828	0.009946966422008506
2.2396829127418343	1.0950715401879896	1.7294773350139059	3.96916024775574	2.8245488752018955	106.0	62.0	2.295005645577787	0.011414263834168452
1.3570652329379749	0.3967470630759027	1.4572367836922295	2.8143020166302044	1.8539838467681322	83.0	30.0	1.9312592490971523	0.011579778564898616
1.1680582936542618	0.7303984019072332	1.4586965318415512	2.626754825495813	2.1890949337487844	72.0	49.0	1.8007548301905063	0.011952137662764322
1.5482317711029487	0.48718504431025234	1.6873486410034293	3.235580412106378	2.1745336853136816	78.0	30.0	1.917552978370996	0.012198265418453348
2.2328881428266603	0.705945731710675	1.5998790172311508	3.832767160057811	2.3058247489418258	99.0	41.0	2.395660621070607	0.01286146474095442
0.8442281903808206	0.2985362101123554	1.1844850928336412	2.028713283214462	1.4830213029459967	80.0	33.0	1.7127385523790555	0.009826644841105294
1.2086908293925456	0.7975028314609576	1.551040507138111	2.7597313365306566	2.3485433385990686	76.0	54.0	1.7792774101191922	0.011083886148538226
2.83514962002236	1.3136598528658257	1.2764987639694902	4.1116483839918505	2.590158616835316	163.0	98.0	3.221035930505706	0.010416819469175609
1.9969627730321682	0.7632784061956424	1.9795281166017682	3.9764908896339364	2.7428065227974106	78.0	36.0	2.0088074810780308	0.013069341643230377
2.3540979268143642	0.7609638929896863	1.772656075915006	4.1267540027293705	2.5336199689046923	98.0	41.0	2.328006012446171	0.01256798746639831
1.686796904549409	0.8692308389719288	1.1411241212224899	2.8279210257718987	2.0103549601944186	126.0	78.0	2.478188808017079	0.010474288860645518
1.474520271413887	0.6423019732239554	1.9444684518387305	3.4189887232526175	2.586770425062686	88.0	44.0	1.7583153483511391	0.009358549845102206
2.204053197857646	0.8197712808284241	1.7153282595917114	3.9193814574493575	2.5350995404201355	111.0	52.0	2.2849162750821015	0.010837648203443873
2.077646471705255	0.8910763660068393	1.3860261868037582	3.4636726585090134	2.2771025528105975	108.0	58.0	2.4989951066483136	0.012349047443422207
2.0017174234258936	0.7134841015430349	1.3566407944160301	3.3583582178419236	2.070124895959065	149.0	69.0	2.4754955266456795	0.008835927988340974
1.4002411844027238	0.4701972479134404	1.80282192226502	3.2030631066677437	2.2730191701784603	63.0	25.0	1.776694118875311	0.013374118127886126
1.0180157804479262	0.3335078398742424	1.7959430782325254	2.8139588586804516	2.129450918106768	59.0	22.0	1.5668418964869448	0.011169993289407813
1.8902419421948595	0.3578895089349543	1.7743673772304187	3.6646093194252782	2.132256886165373	76.0	19.0	2.0653047201224517	0.013951395414838417
2.9305045221139414	1.0681013960902157	1.607989307035341	4.5384938291492825	2.6760907031255567	111.0	54.0	2.822465180142851	0.013608688936701798
2.723797452619359	1.2896107001342596	1.1174457819030654	3.8412432345224246	2.407056482037325	178.0	110.0	3.4375209041288763	0.010064228739077271
2.805378223804354	0.7492865236718758	1.4602556710710504	4.265633894875404	2.209542194742926	133.0	51.0	2.921155506793341	0.01171620576990542
0.8228657624871463	0.5971860656402386	1.8685728798147807	2.691438642301927	2.4657589454550193	51.0	38.0	1.4403712434104854	0.010528814038898122
1.2319235177383443	0.47430372806823096	1.6050972959989913	2.8370208137373356	2.0794010240672223	78.0	35.0	1.7675070668981543	0.010671636146382744
0.695903169261463	-0.16924257706441503	2.275778722863028	2.971681892124491	2.106536145798613	30.0	-2.0	1.30578683343431	0.013273082744970115
2.223039924557133	0.8854235563399451	1.2464557216908854	3.4694956462480184	2.1318792780308304	104.0	54.0	2.7834888844197834	0.014338779824845565
1.4283099716083312	0.3935333122484661	1.384113943320386	2.812423914928717	1.777647255568852	86.0	30.0	2.031930917610672	0.01203354533680514
1.4733210790151967	0.29501074269418526	1.3266573903620402	2.799978469377237	1.6216681330562255	94.0	25.0	2.1105512920808684	0.011587310656955178
3.776095129558313	1.3242426633209046	1.3627437252301549	5.138838854788468	2.6869863885510594	175.0	89.0	3.7709502965574586	0.01100533410918131
1.4799313605485807	0.6590282233850362	1.286252731841439	2.7661840923900196	1.9452809552264752	88.0	47.0	2.1505758735531435	0.012697965876906542
2.001500300226443	0.6321221475831831	1.874886537297655	3.876386837524098	2.507008684880838	91.0	36.0	2.0675314267877143	0.011643436208268427
0.7362164604411094	0.1802618110067864	2.207969184066063	2.9441856445071726	2.3882309950728495	34.0	9.0	1.333436021550508	0.012580260782929072
1.6026845233586111	0.8502009760203646	1.420420511938779	3.02310503529739	2.2706214879591435	96.0	59.0	2.128316938461452	0.011470663219653496
1.6420809193167931	0.5997569836566077	1.6057880795124053	3.2478689988291984	2.205545063169013	92.0	41.0	2.022601263683193	0.011167164115658386
1.6231765829030866	0.9097982487193903	1.243220798879427	2.8663973817825137	2.1530190475988173	109.0	71.0	2.305622126307838	0.011158852646001603
2.555805774814292	0.8366734497654591	1.8146719825557616	4.370477757370054	2.6513454323212207	103.0	44.0	2.4084119881625807	0.012432178468055034
0.2837876101869208	0.0761407671907337	1.503898305076466	1.7876859152633868	1.5800390722671998	29.0	8.0	1.1887013298897837	0.008906652595814912
0.49333916010606815	0.3423317176924012	1.8038118150363762	2.2971509751424444	2.1461435327287774	33.0	23.0	1.2734981310099243	0.010899901322176376
0.942172446406728	0.3719005619797626	1.6870257706273695	2.6291982170340975	2.058926332607132	50.0	22.0	1.558481359805401	0.01306409999454124
1.1306908014501031	0.49342078893637575	2.1275205759361624	3.2582113773862655	2.620941364872538	48.0	23.0	1.5314593965572205	0.013083130157497395
1.299200928580556	0.47853129029679997	1.153632088246674	2.45283301682723	1.632163378543474	101.0	46.0	2.1261830715502392	0.010882658231374456
3.553446179775873	0.9650747289861821	1.3997675990633032	4.953213778839176	2.3648423280494852	148.0	61.0	3.5385972515393047	0.012402568500283597
4.123097491744356	1.4600097881479146	1.4421808953044895	5.565278387048846	2.902190683452404	169.0	87.0	3.85893226374618	0.011596438811428187
1.674730497784295	0.4930796333975369	2.5101399088478757	4.184870406632171	3.0032195422454127	58.0	20.0	1.6671861165511592	0.0129371082241019
2.086313822258572	1.0145837573968193	1.2834306869280956	3.369744509186668	2.298014444324915	117.0	70.0	2.6255757661928634	0.012005464035274273
1.8897929595777654	0.6916971762051933	1.3467785728498247	3.23657153242759	2.038475749055018	111.0	52.0	2.403195000035459	0.011499579239731566
0.4478704086221672	-0.42182094443099905	2.5341542274985294	2.9820246361206966	2.1123332830675303	20.0	-16.0	1.1767336824895072	0.012357255138261318
0.5542820257645351	0.21705558427334104	2.1470640585946708	2.701346084359206	2.364119642868012	32.0	13.0	1.2581581222720166	0.010687524130247898
1.516844077418473	0.8913963122413511	1.6333497179839218	3.150193795402395	2.524746030225273	93.0	61.0	1.9286707315140972	0.010300074599558945
2.153354710896327	0.7871527270238177	1.4134906849602784	3.5668453958566055	2.200643411984096	116.0	55.0	2.523430422151555	0.011612054853511147
0.6200539924451289	0.2224172585336519	1.3500740433189968	1.9701280357641258	1.5724913018526487	58.0	23.0	1.4592740639030433	0.00956580454255925
1.1931578668037244	0.5126169288625777	1.5648513705598177	2.758009237363542	2.0774682994223954	79.0	39.0	1.7624736056414598	0.010482072464583294
2.0442376404759686	0.9037572773792841	1.2958686675244837	3.3401063080004523	2.199625944903768	103.0	57.0	2.5775037175496376	0.013391906945126751
1.7708775170157476	0.5883071041826367	1.605117098690115	3.3759946157058627	2.1934242028727517	101.0	42.0	2.103269984763669	0.010726340524849597
0.9183952931054011	0.6889020011493989	1.548073540675707	2.466468833781108	2.236975541825106	63.0	49.0	1.593250429630454	0.010838274996489016
1.3831086552265788	0.8243058914188541	1.5253868758046938	2.9084955310312726	2.349692767223548	122.0	81.0	1.9067264686520538	0.007695023927585275
2.5277602895397457	1.2368577335787472	1.8675024878371413	4.395262777376887	3.1043602214158885	129.0	76.0	2.353551230053399	0.009647181692953909
1.5051830341999084	0.6310098832349227	1.8221410646277079	3.3273240988276163	2.4531509478626305	82.0	40.0	1.826051870197789	0.010725033908647855
1.1485529100242637	0.3934469626153383	1.8215277099866622	2.970080620010926	2.2149746726020005	66.0	26.0	1.6305437483751888	0.010851586921506442
0.5360580154636057	0.20377648282645167	2.0960471365520608	2.6321051520156664	2.2998236193785124	28.0	11.0	1.255747118523969	0.01216836905781659
1.3344289265661402	0.595781712117152	1.882581761534794	3.217010688100934	2.478363473651946	77.0	39.0	1.7088292013825914	0.010171160603805575
2.308574666073125	0.6432854908568517	1.3344170072485508	3.6429916733216756	1.9777024981054026	98.0	38.0	2.7300249124021585	0.014937258930785336
1.7316417575443008	0.5995290975492606	1.5779022111752283	3.309543968719529	2.177431308724489	93.0	40.0	2.097432873393698	0.011615485208054803
0.6552464936786537	0.2768504325619974	1.229095444531468	1.8843419382101216	1.5059458770934653	62.0	29.0	1.5331127835466303	0.0101059644731131
0.5326905119737022	-1.0445625341722158	3.0602520768419903	3.5929425888156925	2.0156895426697745	25.0	-35.0	1.1740675273140928	0.00964647451864688
2.6883408820455914	0.9040642139387647	1.2801851141171248	3.968525996162716	2.1842493280558894	145.0	68.0	3.0999626166561045	0.011335075123114949
0.730275622767403	0.5310083731185469	1.5219690151219105	2.2522446378893135	2.0529773882404574	56.0	42.0	1.4798229237990812	0.010280446413062689
0.8611141975787686	0.3506719646703189	2.426505325380911	3.2876195229596794	2.7771772900512297	37.0	16.0	1.3548783464728609	0.012171203301973245
0.7916226580600663	0.34006003976243004	2.0880036877559225	2.8796263458159888	2.4280637275183525	50.0	23.0	1.3791289559027844	0.00946443597611224
0.9499938259352865	0.22186200540485856	2.1558211109840975	3.105814936919384	2.377683116388956	42.0	11.0	1.4406644972047935	0.01284718046239709
0.994901606991462	0.041026738711301025	2.431930794717988	3.42683240170945	2.472957533429289	42.0	2.0	1.4090994732055413	0.01206764536769204
1.129844253136399	0.5438726898857655	1.5510407652413762	2.6808850183777753	2.0949134551271418	72.0	39.0	1.7284426550585021	0.011119334362921878
1.6906259010808506	0.9764389810488714	1.437563961804674	3.1281898628855247	2.4140029428535454	121.0	80.0	2.176035255473774	0.009347516090767349
2.4994702893566125	0.7168488117202414	1.7401471844248726	4.239617473781485	2.456995996145114	112.0	43.0	2.4363556782598823	0.011574096977718077
1.8247795943790304	0.6567312949696809	2.2686961123924685	4.093475706771499	2.9254274073621493	66.0	28.0	1.8043296695451632	0.01309943012099546
1.3713547698877364	0.5786866375714164	2.074830774398289	3.4461855442860254	2.6535174119697054	67.0	32.0	1.6609477682754326	0.011091010691961134
1.2176977006452674	0.4900257171084621	1.620364329180895	2.8380620298261623	2.110390046289357	71.0	33.0	1.7514962398986047	0.011551255585349064
2.176712228529129	0.7568804304730035	1.64612398873869	3.822836217267819	2.4030044192116935	99.0	44.0	2.322325804994186	0.01240377944652286
0.9624049432029105	0.28943735834604745	1.6838126353049148	2.6462175785078252	1.9732499936509622	58.0	20.0	1.5715629655128658	0.01144210659026312
1.0538384000409442	0.4131880599544435	1.8039945267480477	2.857832926788992	2.2171825867024912	59.0	26.0	1.584169399859896	0.011443562332069501
1.4670278472351665	0.49996879121084326	1.660389259172885	3.1274171064080516	2.1603580503837283	90.0	37.0	1.88354452977247	0.01026348473177986
2.049492281503739	0.40056958484407135	1.3596411539459936	3.4091334354497325	1.760210738790065	90.0	25.0	2.5073773514104345	0.014900889134889276
1.595197946182383	0.589195585000545	1.2641880594845245	2.8593860056669076	1.8533836444850695	97.0	45.0	2.261835954084892	0.01226556560072592
0.3814895339556581	0.15599576288521355	2.1801514957459673	2.5616410297016254	2.336147258631181	22.0	9.0	1.1749830388851608	0.011078091969024999
1.1703495765973726	0.2613210616032522	1.9941974370754887	3.1645470136728613	2.255518498678741	46.0	12.0	1.5868774850667255	0.014804238870001504
1.3382359661231822	0.29839526231024993	1.8236954050696517	3.161931371192834	2.1220906673799016	70.0	19.0	1.73380453907108	0.011506395146475635
3.897278573030749	1.3828114213662857	1.557849718347791	5.45512829137854	2.9406611397140767	145.0	73.0	3.501703808223611	0.012555951795182652
1.5138542427155706	0.46860418853905017	1.414043253812539	2.9278974965281095	1.882647442351589	90.0	35.0	2.0705855274468594	0.011798188716732428
3.2476855564202114	0.7233694005648688	1.434959427207565	4.682644983627776	2.1583288277724337	114.0	39.0	3.263259500472579	0.01510012139635364
2.5481802178896924	0.9144246068068218	1.2207859790001214	3.7689661968898136	2.1352105858069432	124.0	61.0	3.0873275592309524	0.013222427301703256
1.2082928078346589	0.5579188330769034	1.8257334223111585	3.0340262301458174	2.383652255388062	81.0	42.0	1.6618122848981456	0.009159467840873455
1.98415565367559	0.6997955468827795	1.7027098984262787	3.6868655521018687	2.402505445309058	93.0	41.0	2.165292840259774	0.01211480600282008
0.7229653634925954	0.5674513892846846	1.6140032952341294	2.336968658726725	2.181454684518814	44.0	35.0	1.4479330157673074	0.012418485163981923
0.7531255541092894	0.08931181268977473	1.7073956062242153	2.4605211603335047	1.79670741891399	44.0	6.0	1.4410961064698844	0.012259687251711266
2.2124813869476982	0.8614940437448297	1.6087218777361454	3.8212032646838434	2.470215921480975	118.0	58.0	2.375303846840938	0.0106676245603985
1.9511115279553528	0.8255097865276064	1.2879856630709887	3.2390971910263415	2.113495449598595	109.0	58.0	2.514855004909954	0.012319215029636713
2.893806874849642	1.0678975326387503	1.7668951373828534	4.660702012232496	2.8347926700216037	120.0	58.0	2.6377920871614284	0.011759082812752267
1.041886956314789	0.5174821489856947	2.0394616577565383	3.0813486140713273	2.556943806742233	74.0	40.0	1.5108637136433798	0.008155801768774378
1.0865247171155143	0.5262629631067042	2.062639489829167	3.1491642069446812	2.588902452935871	55.0	29.0	1.526764237024039	0.011305135154177222
1.6597523732081592	1.0688742361129568	1.5555420490648038	3.215294422272963	2.6244162851777606	119.0	85.0	2.066992932917504	0.008877402170965784
1.102962833958192	0.6335090421028107	2.076547580535352	3.179510414493544	2.7100566226381626	49.0	30.0	1.5311522087415106	0.012804535528333695
1.8485711535166682	0.9770265854297449	1.7669905013462082	3.6155616548628764	2.744017086775953	123.0	75.0	2.046169264695145	0.00846660240724006
0.7969425940287203	0.25037785617621067	1.507290426462723	2.304233020491443	1.7576682826389336	59.0	21.0	1.5287253073709015	0.010557399929476616
2.6060287462215386	0.9033600639087007	2.0104026879466246	4.616431434168163	2.9137627518553253	113.0	50.0	2.296272016470129	0.010707978159340686
2.4381936422357597	0.7406940798471222	1.7650064567951977	4.2032000990309575	2.50570053664232	105.0	42.0	2.3814077749397575	0.012036679599639296
0.8244340761289941	0.36128332960895126	1.2813286938182717	2.105762769947266	1.642612023427223	71.0	35.0	1.6434212236926007	0.010238604334925445
1.2019835476645402	0.2991845888977265	1.8260122726615595	3.0279958203260997	2.125196861559286	51.0	15.0	1.658256007180364	0.01459333504352564
1.8394123478874547	0.9526272760064005	1.5428741606238874	3.382286508511342	2.495501436630288	112.0	68.0	2.1921985569734717	0.010201607886408897
1.4542259017626644	0.4398347887533929	1.5112432476667907	2.965469149429455	1.9510780364201836	96.0	36.0	1.9622712319858795	0.01023709968094363
2.0057635169535475	0.37191297949868574	1.523685984051866	3.529449501005413	1.8955989635505517	101.0	26.0	2.3163890315639155	0.012118775705874305
2.64137655250609	1.1304417077079878	1.3342276443635097	3.9756041968696	2.4646693520714975	154.0	86.0	2.9797045606607506	0.010295224142319708
1.0002434721318894	0.2639553551996072	1.825744053039024	2.8259875251709135	2.0896994082386313	56.0	17.0	1.5478552541178727	0.011459464833505188
1.3635123347668332	0.272697298619047	1.9862874046462304	3.3497997394130636	2.2589847032652774	66.0	16.0	1.6864627604129034	0.01160000710571877
1.2739358300161963	0.471991160252603	1.7876654794947446	3.061601309510941	2.2596566397473477	63.0	27.0	1.7126254014684303	0.012519510139187652
2.1900904865626503	0.8591828523139478	1.56488529324803	3.7549757798106804	2.4240681455619777	113.0	56.0	2.3995214192453447	0.01127452402927867
0.2245482379400816	-0.16632593396853212	1.6477485400917038	1.8722967780317854	1.4814226061231717	15.0	-14.0	1.136275792377631	0.013165217328115672
2.0251742680372127	0.8268965576155398	1.6307253142482077	3.6558995822854206	2.4576218718637475	125.0	63.0	2.2418855894015803	0.009392843989319465
2.279533351043076	0.7896088668453538	1.472524780193152	3.752058131236228	2.262133647038506	123.0	56.0	2.5480441359663013	0.01106057596281969
2.273364209205366	0.8191344724822456	1.143335468332918	3.4166996775382836	1.9624699408151636	155.0	76.0	2.9883614845957043	0.010255549825044964
2.013458353664432	1.1179064855134215	1.7697715472739701	3.783229900938402	2.8876780327873917	91.0	58.0	2.1376939338672383	0.012178392319603281
1.0967982438352213	0.46327982109987054	1.5872602878008457	2.684058531636067	2.0505401089007163	81.0	39.0	1.6910008725505499	0.00947346755217114
1.7300468766082089	0.6989858474812634	1.7127291729695409	3.4427760495777497	2.411715020450804	103.0	50.0	2.0101111745581135	0.00987524799712521
3.586472434023502	0.9459045431717548	1.0505595494796767	4.637031983503179	1.9964640926514314	149.0	64.0	4.41386876717252	0.014473268487502527
2.576194344236456	1.2942149688231641	1.5990791590361346	4.1752735032725905	2.8932941278592987	158.0	97.0	2.6110486649011735	0.008819295203495727
1.8890299407435833	0.9668292886149938	1.592864087790883	3.4818940285344664	2.559693376405877	123.0	74.0	2.1859329086660795	0.00924794362330827
2.1897030121847996	0.7879859685460813	1.954177100728091	4.143880112912891	2.7421630692741723	72.0	32.0	2.1205243431462564	0.015273535842909126
1.7598667531224637	0.6924254117703423	1.453702723881705	3.2135694770041687	2.1461281356520474	113.0	55.0	2.2106097926426345	0.010218253475780861
2.357937263615499	0.738978568926349	1.8222052436576446	4.1801425072731435	2.5611838125839936	101.0	41.0	2.294002018610428	0.011978666608559185
0.018343434147527926	-0.1949992967038896	2.3886568261688446	2.4070002603163725	2.193657529464955	2.0	-13.0	1.0076793928481342	0.0110366984392602
0.23018403329706727	0.033824248463138584	2.030607866999697	2.2607919002967645	2.064432115462836	14.0	2.0	1.1133572055136245	0.011916656617406105
0.4500762876112989	0.188360062956348	1.7819439001426738	2.2320201877539727	1.9703039630990218	28.0	-1.0	1.2525760140794908	0.012033265102152205
2.2781631673286595	0.8864932429254533	1.4602769321443385	3.738440099472998	2.346770175069792	108.0	54.0	2.5600898139117345	0.012674714244994263
0.9544969041591362	0.168553202189341	2.7061041425975154	3.6606010467566517	2.8746573447868564	41.0	8.0	1.352719944932696	0.010896579688003774
2.642817481561731	1.0809665664395305	1.3381962566687835	3.9810137382305144	2.419162823108314	117.0	63.0	2.9749102333768174	0.01355901841708274
3.1624473088040768	1.0967646959337698	1.2958036085978704	4.458250917401947	2.39256830453164	136.0	67.0	3.440529790024289	0.013204672114428327
1.4383109352707846	0.43100526870556277	1.8157078590920064	3.254018794362791	2.246713127797569	64.0	23.0	1.7921488735473396	0.013360166457803274
1.8734716462375731	0.5314066232115318	1.7704430474009443	3.6439146936385174	2.301849670612476	89.0	32.0	2.0581936815125896	0.011833849432609293
2.5174890892738264	1.296837471523093	1.509776713964866	4.027265803238692	2.806614185487959	145.0	91.0	2.6674578869762664	0.009829621488844578
2.6001733427180005	0.8917240119300256	1.0555558664463573	3.655729209164358	1.947279878376383	143.0	70.0	3.4633213886364578	0.012620818821733092
1.2738396398038818	0.5613266129117573	1.8197211327339706	3.0935607725378524	2.381047745645728	76.0	38.0	1.7000191495770838	0.010207346632638064
1.8376173422784396	1.0615965014515951	1.497399387021399	3.3350167292998387	2.558995888472994	131.0	87.0	2.227205886556289	0.008886422533695672
1.503718699707432	0.38190491723144193	2.1270269988512838	3.630745698558716	2.5089319160827257	69.0	21.0	1.7069579749197006	0.011344522644723189
1.4185918356378788	0.5474527282131183	0.9259101058188925	2.3445019414567714	1.4733628340320108	125.0	62.0	2.5321053596053464	0.010809172869483168
1.5790058288152378	0.5463726889437712	2.1602390469114976	3.7392448757267354	2.706611735855269	74.0	30.0	1.730940323976066	0.010843232700044423
3.6255395759250773	1.1927084349542147	1.3112221944067246	4.936761770331802	2.5039306293609394	167.0	81.0	3.7650077854009236	0.011522005109338753
0.3654231869237887	0.1671897652715062	2.2592749537272465	2.6246981406510352	2.4264647189987527	22.0	10.0	1.1617435657049757	0.010299602596725887
0.6376668144942679	0.3419290018306258	1.3049611054065453	1.9426279199008132	1.646890107237171	54.0	31.0	1.488648138134056	0.01083024139577098
0.9157288573548059	0.3699642075317624	1.3411439196489305	2.2568727770037365	1.711108127180693	48.0	22.0	1.6827968601568988	0.015975766624941275
1.2475884363202854	0.5836506795679934	1.3144098993127622	2.5619983356330476	1.8980605788807556	90.0	49.0	1.9491623860810738	0.010818587500395205
1.3180696014150672	0.3986045734436152	1.8655176373365208	3.183587238751588	2.264122210780136	70.0	25.0	1.706543628982748	0.011175033310392851
1.4051547157227473	0.2949858861576611	1.6284978155912158	3.033652531313963	1.9234837017488768	72.0	19.0	1.8628533009192982	0.012641043197125926
1.5001242354545288	0.40496369817656386	1.3623653997117762	2.862489635166305	1.76732909788834	98.0	34.0	2.101117391686472	0.011042853290567133
2.44516185750049	0.7173940446591198	1.6670993181722278	4.112261175672717	2.3844933628313476	112.0	44.0	2.466716368273315	0.011735061612817437
1.2462748855173367	0.5973488894023602	1.7726603305869346	3.0189352161042713	2.370009219989295	67.0	36.0	1.7030534073635473	0.011638237550164712
0.6297534400970328	-0.24844756094303921	1.869364886083613	2.4991183261806458	1.6209173251405737	39.0	-15.0	1.3368809614351904	0.011022921333874397
2.3635038279638803	0.5969202104679696	1.670560051638284	4.034063879602164	2.2674802621062535	102.0	35.0	2.4147972864824827	0.01259308995150416
1.318871197384024	0.34007423761622335	1.5606100067499926	2.8794812041340165	1.900684244366216	88.0	28.0	1.8450997953874488	0.010157458034850377
2.013366082647737	0.7589664962683635	1.5011914984233383	3.514557581071075	2.260157994691702	80.0	38.0	2.3411787135500846	0.015534621095922503
1.5838153250515457	0.5372475651084403	1.328298956973624	2.9121142820251698	1.8655465220820644	105.0	45.0	2.19236359912537	0.010889298906092153
1.7291028071593282	0.4513911774113122	1.4499448396116137	3.179047646770942	1.9013360170229259	85.0	29.0	2.192530060400429	0.013483293127259216
1.6203713005779572	0.6693591820927649	1.3780284986879026	2.9983997992658598	2.0473876807806675	109.0	55.0	2.175861966658021	0.01038506515863988
1.82582830907826	1.0584237507146834	1.7113261840938436	3.5371544931721037	2.769749934808527	96.0	63.0	2.0669084164367217	0.01102604700172686
0.7755555391516142	0.1367080178313964	2.1635259752648666	2.939081514416481	2.300233993096263	36.0	7.0	1.3584683280988423	0.01262802658153904
2.1763637080864733	1.1580976232898175	1.544140086727973	3.7205037948144466	2.7022377100177906	122.0	77.0	2.409434109503743	0.01048507725962566
1.1779935123830787	0.417273707053021	1.6348479196012844	2.812841431984363	2.0521216266543054	75.0	31.0	1.7205523512366667	0.010579348508332406
1.3879473389394212	0.6223621847720866	1.6814711942862475	3.0694185332256687	2.303833379058334	87.0	45.0	1.8254362867801481	0.010095829247127685
2.16651487288926	0.9516670265642773	1.6957949529287768	3.862309825818037	2.647461979493054	86.0	46.0	2.277580682232549	0.013970613667423139
3.787426336790899	1.296596310673949	1.868457830030119	5.655884166821018	3.165054140704068	146.0	69.0	3.0270333512048526	0.011020031521088396
1.203019018130584	0.29740726118599736	0.9016755480149646	2.1046945661455485	1.199082809200962	114.0	38.0	2.334203883846053	0.01082239451754659
2.2913969996290255	1.1063582159900722	1.8428023341972057	4.134199333826231	2.949160550187278	123.0	71.0	2.243430701767178	0.009554972300946034
1.3794091508491242	0.5609500913700929	2.0654184208982334	3.4448275717473575	2.6263685122683262	67.0	31.0	1.6678594210703468	0.011181783233573992
1.305734523523323	0.6625127474541421	1.5527427123232855	2.8584772358466086	2.2152554597774277	80.0	46.0	1.8409213665344613	0.011144658284220272
1.4736880451908287	0.6505568269503028	1.040682979318553	2.5143710245093818	1.6912398062688558	110.0	60.0	2.4160777820694355	0.011675843127108563
2.1411316142658343	0.8630666490817829	1.219238642031267	3.3603702562971014	2.08230529111305	162.0	85.0	2.7561218455959384	0.00908471844512171
0.7112972494080569	0.14218927605387988	2.3437263898048823	3.0550236392129393	2.4859156658587622	28.0	6.0	1.3034898836750621	0.014162199489895107
0.8742568734377034	0.3742323758270478	2.5035678978085216	3.377824771246225	2.8778002736355695	44.0	20.0	1.3492043791594297	0.010049044327478692
2.6390167704429306	1.34118675279472	1.6524455617641045	4.291462332207035	2.9936323145588246	107.0	66.0	2.597037041042121	0.012989307462700373
2.506592246552609	0.6272365870320207	1.3986615682369594	3.9052538147895683	2.02589815526898	98.0	35.0	2.7921363562682417	0.015271849468692584
3.1040247404335424	1.0646601243215832	1.3146743385258186	4.418699078959361	2.379334462847402	142.0	69.0	3.361059807339187	0.012403661095496406
0.5457379512885896	-0.1544736758457801	2.8007757507795255	3.346513702068115	2.6463020749337454	22.0	0.0	1.1948524265595692	0.012230116443054669
0.6791766072718697	0.2937630174909387	2.1403232771747738	2.8194998844466435	2.4340862946657125	31.0	14.0	1.3173243100772996	0.013253685474309334
1.8308461590109737	0.3951920634047681	1.9507623384052197	3.7816084974161934	2.345954401809988	62.0	17.0	1.9385285552045877	0.015655114535227246
1.1338752995164283	0.3539356573486967	1.3863040977832104	2.5201793972996387	1.740239755131907	93.0	35.0	1.8179123911770643	0.00937263777018044
1.7499650096661097	0.6312519241504515	1.3954754182000335	3.145440427866143	2.026727342350485	99.0	45.0	2.2540278293997593	0.011964340080442207
1.3436726691452132	0.653739616230399	1.3886868823533036	2.732359551498517	2.0424264985837026	101.0	57.0	1.967585051907592	0.009764259998055467
1.564134731158112	0.39627607771060847	1.8855283525973046	3.4496630837554165	2.281804430307913	77.0	24.0	1.8295471818302416	0.011466929230706153
1.711976719222483	0.4037566200484948	1.3676974048015944	3.0796741240240775	1.7714540248500892	92.0	29.0	2.251721845206566	0.012868446401829716
2.2765775014732723	0.8703875240276859	1.2753288136205352	3.5519063150938077	2.145716337648221	127.0	64.0	2.7850906191088782	0.011727970393780374
1.473491396038532	0.6646572097002477	1.3137292358170771	2.787220631855609	1.9783864455173248	80.0	43.0	2.1216096558299475	0.013736192994235522
2.621541713540905	0.7222372439821998	1.8098170367828244	4.43135875032373	2.532054280765024	105.0	39.0	2.448512009921745	0.012422166081401249
0.9993230837664426	0.591160110222257	2.470514751095386	3.4698378348618286	3.061674861317643	39.0	24.0	1.4044999461441625	0.012896225503786288
2.0113079939689698	0.9915380380795344	1.6947122703034396	3.7060202642724094	2.686250308382974	125.0	73.0	2.18681384988665	0.009103471111217261
0.3539031027345523	-0.32265946730531603	2.628261084143931	2.9821641868784834	2.305601616838615	14.0	-2.0	1.1346529478633682	0.014019314857340981
1.074244327990152	0.4062188146626282	1.5559490025948344	2.6301933305849863	1.9621678172574626	87.0	38.0	1.6904110135991923	0.008806675256534849
1.643360603933326	0.49620054554853543	1.397904623327194	3.04126522726052	1.8941051688757293	88.0	34.0	2.1755885033285853	0.012889720771999562
2.3738619505419782	0.6973781752208377	1.3353583220899161	3.7092202726318946	2.032736497310754	125.0	51.0	2.7776966011839743	0.011886201830737074
0.47354432245268985	-0.24262032053466553	2.6138490420308256	3.0873933644835154	2.37122872149616	20.0	-9.0	1.181167433481457	0.012642814995504958
1.759043479906714	1.009949801121314	1.4967057830175903	3.2557492629243043	2.506655584138904	108.0	71.0	2.175276730981964	0.010478494833431716
2.3376965591039065	1.1502568261233577	1.5635320423590022	3.901228601462909	2.71378886848236	132.0	79.0	2.495138248383367	0.010069616437638637
2.05404901999254	0.8755009560892175	0.8679885141525479	2.922037534145088	1.7434894702417654	182.0	104.0	3.3664472357655457	0.009675286479720647
2.122231249376906	0.5519914480210752	1.0177528944889718	3.1399841438658775	1.569744342510047	118.0	45.0	3.085212688530361	0.013892050849387336
0.9761315464914833	0.3427529853919262	2.058532429066168	3.034663975557651	2.401285414458094	64.0	25.0	1.4741880830773675	0.008887628591099945
1.2574951539318637	0.6409866873192622	1.4504032870960213	2.707898441027885	2.0913899744152835	88.0	51.0	1.8669969001860194	0.010353098071602028
1.1228325747249497	0.36605374285297576	1.329074923549208	2.4519074982741578	1.6951286664021838	74.0	29.0	1.8448226317644294	0.012102494750510721
1.041245297670708	0.4650210432115718	1.9445892632378348	2.985834560908543	2.4096103064494065	59.0	29.0	1.5354577017138233	0.010666702930524612
1.9170251044380704	0.6811634481399933	1.9050658117285848	3.822090916166655	2.586229259868578	83.0	36.0	2.0062776270698146	0.0122502592528442
1.4932153594481952	0.5408859202712379	1.6954985794583395	3.1887139389065347	2.2363844997295774	74.0	32.0	1.8806939607848165	0.01248308360117368
2.1734333233735086	0.5446563298993141	1.6253512807057102	3.7987846040792186	2.1700076106050243	95.0	32.0	2.3372083617701565	0.013029642084018092
1.688771055877716	1.05402528559885	1.879980926331436	3.568751982209152	2.934006211930286	73.0	50.0	1.8982915902094584	0.012843078012934982
2.434802353441587	1.0446309459279894	1.2399983398661272	3.674800693307714	2.2846292857941166	161.0	90.0	2.9635529138728147	0.009795798855487703
2.828565117119693	0.9397404483569274	1.1078998900394617	3.9364650071591543	2.047640338396389	162.0	78.0	3.553087280312794	0.011360702660806705
1.0024552412150647	0.46000818856972825	1.412811566395829	2.4152668076108936	1.8728197549655572	79.0	41.0	1.709546315346491	0.009918121911063484
0.3895239675582851	0.0046974057183102325	2.0399880598897147	2.4295120274479998	2.044685465608025	22.0	0.0	1.1909442389478218	0.012005041263720418
1.1016300520732263	0.31847245729452833	1.3798867832835477	2.481516835356774	1.698359240578076	66.0	23.0	1.7983481437888782	0.013025728315137625
1.4501589427631878	0.5399884867123295	1.837373576782068	3.287532519545256	2.3773620634943975	71.0	31.0	1.7892564479472712	0.011990859695817308
1.4951253639554762	0.47431309806164546	2.037902665264132	3.5330280292196083	2.5122157633257776	72.0	27.0	1.7336588687181944	0.011180564056705986
2.1376788378373313	1.0982741273608394	1.8188812319296235	3.9565600697669545	2.917155359290463	103.0	62.0	2.1752712603282514	0.010992110969662154
1.8140861901476637	0.8309898942301064	1.5406836367710832	3.354769826918747	2.3716735310011896	93.0	51.0	2.1774553495937488	0.012202642777713942
1.909948611460895	0.8434783890261472	1.4371128241641091	3.347061435625004	2.2805912131902564	120.0	65.0	2.3290178609127707	0.010249762213596761
1.4881674129742086	0.32725872757395846	1.6567529001315806	3.1449203131057892	1.984011627705539	65.0	18.0	1.898243433197562	0.01444789089538514
3.4273093667575427	1.1769820445735881	1.2423799687132426	4.669689335470785	2.4193620132868308	150.0	75.0	3.758664380517399	0.012820269125439997
1.8407834057870507	1.0303925565691459	2.1898782309870914	4.030661636774142	3.2202707875562373	107.0	67.0	1.8405871065065176	0.008303453089114227
0.9222520299488717	0.3009116673868206	2.2207304162255683	3.14298244617444	2.521642083612389	42.0	15.0	1.4152922044073966	0.01222194989923401
2.104540515923035	0.8877383239204863	1.0595357345504668	3.164076250473502	1.9472740584709531	152.0	84.0	2.986285546863539	0.010452663057731945
1.835011821047196	0.7815235874327613	1.4132539004528757	3.2482657215000716	2.194777487885637	122.0	64.0	2.29843039559924	0.009922718818461771
2.4037280432732855	1.0740823208774557	1.2432227512527116	3.646950794525997	2.3173050721301673	160.0	92.0	2.933465294816404	0.009764817131459687
2.251249916644314	0.7231559310245921	1.420197510987452	3.671447427631766	2.143353442012044	121.0	52.0	2.5851667808367287	0.01141881131953839
2.4500088373029296	0.63082603210266	1.1390485653598106	3.58905740266274	1.7698745974624706	126.0	48.0	3.1509257039703162	0.0132462058983099
1.7499835793164211	1.0639889638558666	1.370838612171536	3.120822191487957	2.4348275760274025	117.0	81.0	2.2765788501859343	0.010231615763114463
1.0955803881291257	0.6308762693552574	1.3914039192057435	2.486984307334869	2.022280188561001	74.0	47.0	1.787392052736575	0.011477481024588376
0.9667767405051368	0.033893970788115624	1.7704575778459641	2.737234318351101	1.8043515486340798	53.0	-6.0	1.5460603815660867	0.012088397403536075
1.3351877202765703	-0.1671647070845821	2.2923213882998845	3.627509108576455	2.1251566812153024	47.0	-5.0	1.5824609616659473	0.014394998036901042
1.7700331830827887	0.43860215528824553	1.4029481939409214	3.17298137702371	1.841550349229167	88.0	29.0	2.2616525618887717	0.013533072616035357
2.7006572722846776	0.920228718571594	1.3637506484200528	4.06440792070473	2.283979366991647	145.0	68.0	2.980316031683264	0.010940731400578472
1.5371518738903827	0.6543373347011392	1.2972755366277176	2.8344274105181	1.9516128713288567	112.0	58.0	2.184907778255209	0.010158309792563257
1.6936478352997195	0.8859230987162312	1.5642182705744054	3.257866105874125	2.4501413692906366	104.0	63.0	2.082743928491377	0.010276557982652501
2.0436528368192692	0.49057466602618094	1.692653555963202	3.7363063927824713	2.183228221989383	85.0	27.0	2.207366285687641	0.013599119610031686
1.5456146829904212	0.3482682413518261	2.390372844679351	3.9359875276697722	2.738641086031177	56.0	15.0	1.6465998333401217	0.013081636094155708
0.46219476472864596	-0.2176635944742631	2.74930372126225	3.211498485990896	2.531640126787987	23.0	-6.0	1.168113388547863	0.010190014688760818
1.0227241468528372	0.13178634565867853	2.2222940119052703	3.2450181587581075	2.354080357563949	47.0	7.0	1.460210998802994	0.011873409824689532
1.3258819837235531	0.021976530514592696	2.33393462682612	3.659816610549673	2.3559111573407128	49.0	1.0	1.5680887409972568	0.013520983468809476
2.1201772329856046	1.128525276657169	1.4743337556663718	3.5945109886519764	2.6028590323235408	128.0	81.0	2.4380578514444466	0.010123876845251158
1.9860837921506596	0.8027749033157039	1.4412295582296766	3.427313350380336	2.2440044615453805	136.0	69.0	2.378048195590889	0.009257614476230067
2.3685804073657883	0.9370150675300013	1.3307698337867597	3.699350241152548	2.267784901316761	118.0	61.0	2.7798573030663736	0.01260693015174137
0.19634695116680412	0.17107812164841008	2.833322235878857	3.029669187045661	3.004400357527267	9.0	7.0	1.069299195368754	0.012083197871836829
0.10396234059022103	-0.13925067331220942	1.4800801862653412	1.5840425268555622	1.3408295129531318	9.0	-7.0	1.0702410190711	0.012241966151039991
1.6745680875977458	0.5688286306413737	1.7345279689469772	3.409096056544723	2.303356599588351	82.0	34.0	1.9654315857554994	0.012035137607464197
2.4210311813460086	0.9300658867272034	1.3057378460102467	3.726769027356255	2.23580373273745	118.0	60.0	2.854147973686756	0.012932137892920487
1.0593909863396576	0.08804467357843704	2.1754399968395575	3.234830983179215	2.2634846704179945	51.0	5.0	1.486977801216638	0.011447662197117627
2.342255852006743	0.9601772283722296	1.2510943440389697	3.593350196045713	2.2112715724111993	114.0	61.0	2.8721656469528294	0.01347025625119009
0.9643401685697863	0.44108821198158243	1.2862192543920716	2.250559422961858	1.727307466373654	75.0	39.0	1.7497478872881431	0.010907392784860763
1.6378837539738513	0.7186510318669606	1.3441362381806665	2.982019992154518	2.062787270047627	81.0	43.0	2.2185399868325715	0.014370131955524347
2.9791662722670633	0.8198110842270099	2.417125571968432	5.3962918442354955	3.236936656195442	100.0	36.0	2.2325244111504405	0.01170379747809187
1.7093048531220538	0.47052327481374867	1.4368133857734673	3.146118238895521	1.907336660587216	84.0	30.0	2.1896498668836513	0.013622893927628051
1.1417426157534263	0.09810888456804245	1.4395036708221207	2.581246286575547	1.5376125553901632	63.0	7.0	1.793150193984126	0.013588650535190379
1.6736655637419025	1.000891156609048	1.1964270756182087	2.870092639360111	2.1973182322272566	96.0	66.0	2.398886399220862	0.013288050942262767
0.8280553422778731	0.5868875295859146	1.8631983699142487	2.691253712192122	2.4500858995001633	48.0	35.0	1.4444268284305033	0.011287172806654323
1.3187350435069014	0.3942121517969617	2.0174723207538308	3.336207364260732	2.4116844725507924	63.0	22.0	1.6536570687691787	0.011704194888210184
1.2915596688777666	0.38902798558349017	1.331322082804901	2.6228817516826677	1.7203500683883912	83.0	31.0	1.9701331372470283	0.01193040398928266
1.2421364436897941	0.14695438560978769	2.0767394996805217	3.318875943370316	2.2236938852903094	49.0	7.0	1.598118562237045	0.01409113424613066
1.8600215868375625	0.6282700939129391	1.9302409268784266	3.790262513715989	2.5585110207913657	92.0	38.0	1.963621463485171	0.010697987267798258
3.5516726298592554	1.2475786497272328	1.5988077524817532	5.150480382341009	2.846386402208986	145.0	71.0	3.2214507181030134	0.01172021197579844
1.8690254837943745	0.5281816448192518	2.2294128601233214	4.098438343917696	2.757594504942573	64.0	22.0	1.838348749675279	0.013943023548366438
0.4657631476767288	-0.00879700518028037	1.5990661891485873	2.064829336825316	1.590269183968307	32.0	-1.0	1.2912719628727323	0.01189654476397603
1.239719194500583	0.8226757496466048	1.251606232620363	2.491325427120946	2.074281982266968	125.0	91.0	1.9905025735650954	0.00800913497357257
1.488925775696601	0.695811187188186	1.4031944271874337	2.8921202028840347	2.0990056143756197	89.0	49.0	2.061097269806728	0.011856961271603773
1.5502931818603798	0.6007595597946478	1.104739028055884	2.6550322099162638	1.7054985878505318	106.0	52.0	2.4033116803962113	0.012047845339639164
2.4710067008317687	1.1129013276182256	1.1559009147317203	3.626907615563489	2.268802242349946	118.0	69.0	3.137732282533299	0.014100190290505615
0.6594769126465683	-0.14673671235276675	1.784377552721991	2.443854465368559	1.6376408403692242	38.0	-9.0	1.3695837305510623	0.012263174838015055
2.0006994670392153	0.9745415146352967	0.9645904288147802	2.9652898958539953	1.939131943450077	157.0	97.0	3.0741440172670296	0.010385799704361279
1.6447005854363794	0.2989383001104864	1.677206559454956	3.3219071448913353	1.9761448595654423	76.0	18.0	1.98061897991316	0.013146018260612142
1.7847685623204068	0.9190953714281216	1.3825205113647572	3.167289073685164	2.3016158827928788	149.0	91.0	2.290952682183767	0.008080727440709272
2.8016662772105843	1.0542071088960319	1.4210777335110822	4.222744010721667	2.475284842407114	158.0	80.0	2.9715081104595575	0.010007613494637491
0.821865385942278	0.5486547294174566	1.7078681142172192	2.529733500159497	2.256522843634676	56.0	39.0	1.481222981505788	0.010305251609672663
1.6166575016827	0.627501323387522	1.9190988659586397	3.5357563676413397	2.5466001893461616	55.0	25.0	1.8424044901277858	0.016325737634124718
0.2655546508359876	-0.4644778483635488	3.1162950991117637	3.3818497499477513	2.651817250748215	12.0	-2.0	1.0852148600790978	0.010725518909028673
2.4563225186849564	0.8872092780119853	1.4765257905776523	3.9328483092626088	2.3637350685896377	128.0	61.0	2.6635825356792338	0.01112888177933218
2.908646229515175	1.1789652841073466	1.3133916748529912	4.222037904368166	2.492356958960338	145.0	79.0	3.2146068725772468	0.011698904967106023
2.0493538892470897	0.8064508693654031	1.3124825983005728	3.3618364875476625	2.118933467665976	109.0	55.0	2.5614331892099993	0.01256436353653438
1.7971319467386346	0.5391365377968742	1.1530433755370784	2.950175322275713	1.6921799133339526	121.0	49.0	2.5585987351963624	0.011294615894894182
1.0423054393211608	0.7065901287402261	1.5494380682983706	2.5917435076195314	2.2560281970385967	90.0	65.0	1.6726990001387052	0.008339077053521497
1.6609828403757714	0.7969267598650112	1.1195918323542062	2.7805746727299776	1.9165185922192174	133.0	78.0	2.483561055356364	0.009942501622201071
0.8813654132053321	0.4035851593501951	1.7363475261376007	2.617712939342933	2.139932685487796	56.0	28.0	1.5075973559082816	0.010768203088254491
1.3989720647249118	0.469470822811471	1.4745532611523853	2.873525325877297	1.9440240839638563	71.0	29.0	1.9487429864904264	0.013750626152644533
0.6834465121959095	0.40547288458118635	1.392180311384003	2.0756268235799125	1.7976531959651894	51.0	32.0	1.4909180991911006	0.011524020160660835
1.59588129260492	0.7523801894370992	1.39045751677805	2.98633880938297	2.142837706215149	77.0	43.0	2.1477382612184193	0.014510765616780427
1.011247653866886	0.3265146791722213	1.4649264768843246	2.4761741307512106	1.791441156056546	61.0	23.0	1.690306080082364	0.01262140854863435
1.1364242160143314	0.2759811325306183	1.6530323860205447	2.789456602034876	1.929013518551163	62.0	18.0	1.687478494447481	0.012374903545833135
1.029269994055483	0.34205287549349706	1.8583248289237604	2.8875948229792434	2.2003777044172574	61.0	23.0	1.5538697960848855	0.010597760343288612
1.735623203566311	0.948383121478382	1.2559582567227963	2.9915814602891073	2.2043413782011783	109.0	70.0	2.3819115358938094	0.011593702153302259
4.719726362347124	0.8710412006708148	1.5180224367829778	6.237748799130102	2.3890636374537926	135.0	43.0	4.10912819730732	0.015215166721361122
2.2425021796849984	0.9296781021432668	0.7730503905712304	3.015552570256229	1.7027284927144972	182.0	105.0	3.900848647172852	0.010849657585181941
1.325064327419196	0.700024670581453	1.4307389342698382	2.7558032616890342	2.1307636048512912	80.0	48.0	1.9261398398271925	0.011971043648072879
1.7931238515467964	0.8689321389689344	1.449316557316217	3.2424404088630134	2.3182486962851514	109.0	63.0	2.2372202901395313	0.010756549257457575
0.8752766559650347	0.04223241451771953	2.1018627248412476	2.9771393808062823	2.144095139358967	36.0	2.0	1.416429030126667	0.014350237645734572
1.2526051702929268	0.5664846534344177	1.90611680672699	3.158721977019917	2.4726014601614077	67.0	34.0	1.6571502679543475	0.011040976211517619
1.0546392755110812	0.37546552014277346	1.2269029683689625	2.2815422438800437	1.602368488511736	80.0	34.0	1.8595946889859696	0.01132896469151107
0.4310231872406116	0.20421968062879214	1.8467056019414234	2.277728789182035	2.0509252825702156	19.0	9.0	1.2334011370234006	0.01681344896623881
1.777343956303122	0.842860661513172	1.3959705250069863	3.173314481310108	2.2388311865201582	114.0	65.0	2.2731959052604114	0.010484265679269683
0.9751100819148433	0.5066015760829989	1.4743420232657365	2.4494521051805798	1.9809435993487354	56.0	32.0	1.6613866162174018	0.013316142500661349
1.6520360644661356	0.5814791925695115	1.5675611056983672	3.2195971701645028	2.1490402982678787	74.0	32.0	2.053889419979028	0.01422408917834411
1.6114181812463202	0.9448018248228132	1.3186557621274884	2.9300739433738086	2.2634575869503015	134.0	90.0	2.2220158039172375	0.00866066975805625
2.2489803498128036	0.891334600846168	1.375149639172236	3.6241299889850396	2.266484240018404	129.0	66.0	2.635444089682171	0.010922235046569338
2.9800060992027952	0.7810710311060411	1.423750096455445	4.40375619565824	2.204821127561486	143.0	55.0	3.09306823340823	0.011472103237897872
3.106155898219167	1.3093071644330632	1.6030469523112991	4.709202850530466	2.9123541167443623	149.0	82.0	2.9376574676996583	0.010504501261836833
2.1414419726240093	0.6632824698366229	1.3909871588719953	3.532429131496005	2.054269628708618	99.0	41.0	2.539512395183135	0.013719913425162461
1.6837302713150657	0.62462060531958	1.7278320839588286	3.4115623552738943	2.3524526892784086	98.0	44.0	1.974475637387913	0.010118242956881613
2.874488175553227	0.594758683046424	1.7525886727630131	4.62707684831624	2.347347355809437	104.0	31.0	2.640138510664629	0.013598190488040942
3.211134769360253	0.6886234929323951	1.5022563145316914	4.713391083891945	2.1908798074640865	101.0	33.0	3.1375412027216423	0.016496344049030623
0.9855791183305214	0.4358192823535141	1.4746815069410228	2.460260625271544	1.910500789294537	86.0	43.0	1.668333544356258	0.008687150009678258
2.0134554862758725	0.7897720706252895	1.27805707323014	3.2915125595060126	2.0678291438554295	117.0	59.0	2.575403421685308	0.011765503789888446
0.5653639942046655	0.06508756407057459	1.9401556538880074	2.505519648092673	2.005243217958582	32.0	4.0	1.2914013589949316	0.011901208077619954
0.25174865478834185	-0.17915544781377202	2.1148610741770324	2.3666097289653742	1.9357056263632604	14.0	-14.0	1.1190379159474133	0.012481455341877565
1.9571793212871698	0.9431241340121601	2.0492197763318427	4.0063990976190125	2.992343910344003	86.0	48.0	1.9550851225877648	0.01137919320588568
1.9522857792944197	0.6216991363047517	1.4357689281828032	3.388054707477223	2.057468064487555	106.0	44.0	2.359749289020589	0.011796510370965612
1.688021457667165	0.7467425328372768	1.857076176746825	3.54509763441399	2.6038187095841017	89.0	46.0	1.908967267365518	0.010599913243010944
2.454101134149919	1.1712309574689663	1.4655841501016842	3.919685284251603	2.6368151075706505	135.0	80.0	2.674486677533767	0.010591507590899144
0.49313256324590693	0.469794736746346	2.4987555342629593	2.991888097508866	2.9685502710093052	24.0	22.0	1.197351264052873	0.011297671927870801
1.1383418716932727	0.25661904379988654	1.8357755190731044	2.974117390766377	2.092394562872991	60.0	16.0	1.6200877285192414	0.011797829455020215
1.2908422054798183	0.4466486881103269	1.9575773562451066	3.248419561724925	2.4042260443554335	70.0	28.0	1.6594080184682076	0.010589400906844206
1.9993598455183121	0.6865761347940447	1.589224041896643	3.588583887414955	2.2758001766906877	94.0	41.0	2.258072992107643	0.01263539916039568
0.8835429163228081	0.2882190474351749	1.5064445006176412	2.3899874169404494	1.7946635480528161	59.0	22.0	1.5865087734467191	0.011480267231544128
0.8882231982444684	0.19342810045765457	2.084485631610875	2.9727088298553435	2.2779137320685297	45.0	11.0	1.426111451561341	0.011638334858354334
1.196242475270265	0.07090613447203231	1.8428996738279995	3.0391421490982644	1.9138058083000318	54.0	4.0	1.6491088431230099	0.013616728707304593
2.791034225667545	1.1104412824772367	1.246931574762723	4.037965800430268	2.3573728572399597	132.0	71.0	3.2383218792086863	0.012940812154243293
1.298415367436029	0.7007334490655359	1.6363168174195057	2.9347321848555348	2.3370502664850417	60.0	36.0	1.7934987611284519	0.014284351673632205
0.43583175282042275	-0.19592648214610553	1.8080259559904448	2.2438577088108675	1.6120994738443393	26.0	-28.0	1.2410539247937247	0.012462632123720003
0.888432494648473	0.622313962436942	1.3387558801546462	2.227188374803119	1.9610698425915882	57.0	42.0	1.6636254658659992	0.0131130477544676
2.2274656541386384	0.8152428746701679	1.7283873657901547	3.955853019928793	2.5436302404603226	91.0	42.0	2.2887537239780293	0.013272913704445896
0.7874159493192232	0.04382379347662235	1.7339245832718702	2.5213405325910934	1.7777483767484925	46.0	3.0	1.454123528160256	0.012003329594907176
3.0115960757980442	0.7199858353926674	1.610147264059945	4.621743339857989	2.3301330994526124	98.0	34.0	2.8703854877251302	0.015682933003301442
3.673540164200311	1.5864551571222851	1.4667471520961761	5.1402873162964875	3.0532023092184613	131.0	76.0	3.5045490348833033	0.013917144694504963
0.8173433590194681	0.29540198016036356	2.5073380119330526	3.3246813709525207	2.802739992093416	39.0	15.0	1.3259805240177134	0.010712094350598271
3.2283471261736585	1.1694027504593347	1.5373117501835358	4.765658876357194	2.7067145006428706	137.0	68.0	3.0999950893423107	0.012001955368741442
2.1501900640455647	0.5995431786080734	1.4412950379559062	3.591485102001471	2.0408382165639796	106.0	40.0	2.4918458798658167	0.012544903245160303
2.513527170608686	0.6297690408452434	1.1645565105097182	3.6780836811184043	1.7943255513549616	142.0	53.0	3.1583556898484324	0.011767189040841522
2.232927463528707	0.9341210321295652	1.2924176482493104	3.5253451117780177	2.2265386803788756	108.0	58.0	2.727713534826298	0.013529833085186365
3.5925239660493506	1.4946293075007628	1.6114557335497306	5.203979699599081	3.1060850410504934	185.0	103.0	3.229365592398684	0.009191580303697787
1.926984897620845	0.9877901759937535	1.1288190156487976	3.0558039132696426	2.116609191642551	161.0	101.0	2.707080471631934	0.008979611089084693
1.9289104543228037	0.7035597654244101	1.3036926026654652	3.232603056988269	2.0072523680898753	102.0	48.0	2.4795745947925525	0.012971214134825288
1.6803620420584058	0.732985470708722	1.391336661362796	3.0716987034212018	2.124322132071518	132.0	70.0	2.207732167721731	0.008721871460806729
0.7951558434621826	0.5797685256373	2.2518220003558143	3.046977843817997	2.8315905259931142	34.0	25.0	1.3531166510215011	0.013220794490096801
0.5752256195689964	0.26065636367099976	1.9839992568485594	2.559224876417556	2.244655620519559	34.0	16.0	1.2899323765285584	0.011130164718874775
1.7034769681967745	0.4437223868482585	2.1552177534635644	3.858694721660339	2.598940140311823	57.0	18.0	1.7903966851883921	0.015004986970829708
1.6744571429091628	0.46619137954756185	1.9377766806624879	3.6122338235716507	2.4039680602100497	79.0	27.0	1.864112546930175	0.011519089310428015
1.0611867574462215	0.37618676143251006	1.548503797600818	2.6096905550470395	1.924690559033328	85.0	35.0	1.6852981304213632	0.008964331282716669
1.3496485572264696	0.6591817588445212	1.1382336992270932	2.4878822564535628	1.7974154580716144	90.0	52.0	2.185739411988009	0.012675521465326222
2.072682750251551	0.7423764963495014	1.466722365785073	3.5394051160366238	2.2090988621345744	115.0	53.0	2.413139117942156	0.011148342891249973
1.3334034341044054	0.20272470652882513	1.9880448559328014	3.321448290037207	2.1907695624616266	38.0	7.0	1.6707109400098346	0.020012490417157067
2.2577454110063915	1.1345664443687937	1.6871536762321266	3.944899087238518	2.8217201206009204	110.0	66.0	2.338197843392993	0.011242174373302405
3.0271995055370624	0.740053987179411	1.504062513700407	4.531262019237469	2.244116500879818	114.0	41.0	3.0126819716351547	0.014080074207590509
0.200832057510123	-0.550657817122298	3.5378278734548982	3.7386599309650212	2.9871700563326002	8.0	-16.0	1.0567670516185963	0.011379627338909282
0.9082003726762484	0.6285968335605459	1.737261281740075	2.6454616544163234	2.365858115300621	65.0	47.0	1.5227770757468198	0.009479761820271364
0.3522235980884436	-0.2871553872858388	2.737793633652714	3.090017231741158	2.4506382463668754	14.0	-7.0	1.1286523548593812	0.013430859893999175
1.0267135420358662	0.26873564309470654	1.9967236430972417	3.023437185133108	2.2654592861919483	47.0	14.0	1.5141991209375711	0.013012063821146575
1.2184814721440829	0.7066677481406007	1.1448007268001128	2.3632821989441957	1.8514684749407135	99.0	65.0	2.0643611972102067	0.01067036141178526
1.637674457524351	0.16008666460075638	1.7597968574489546	3.3974713149733056	1.919883522049711	69.0	9.0	1.9306042629820153	0.013956653965464636
2.430320716880028	0.9774195872481286	1.48322927439236	3.913549991272388	2.4606488616404887	139.0	72.0	2.638533407369313	0.010143016305068728
0.49474138110683885	-0.38718214629654435	2.861640012814207	3.356381393921046	2.4744578665176626	21.0	-6.0	1.1728873579106471	0.011503223303147996
0.8293208405717849	0.4195943263047519	1.6853332058082107	2.5146540463799956	2.1049275321129626	46.0	25.0	1.4920812321941284	0.012829468471826247
1.5674122608313674	0.5890989735566252	1.5620770944983386	3.129489355329706	2.151176068054964	77.0	35.0	2.0034154308720225	0.013190284359509035
1.6121688947310429	0.8240104125256489	1.5974381533111683	3.209607048042211	2.4214485658368172	105.0	62.0	2.009221478396106	0.009679198100812294
1.8739065745645	0.8973505501060857	1.7811758736962762	3.655082448260776	2.678526423802362	75.0	42.0	2.0520615073658	0.014014513164090504
1.9345434802743506	0.5732449928911483	1.5403063191449191	3.4748497994192697	2.1135513120360674	91.0	35.0	2.255947246485548	0.013041481465181599
2.1359571745343233	0.43111041971301844	2.013922422269707	4.1498795968040305	2.4450328419827256	83.0	22.0	2.0605955576615917	0.01272026059063125
1.476527280102161	0.4472740042485701	1.4086225510162929	2.885149831118454	1.855896555264863	92.0	35.0	2.048206475919952	0.011366606132935029
0.14998399769932158	-0.004751417230047572	2.3911826979424315	2.541166695641753	2.386431280712384	8.0	-4.0	1.062723771725339	0.012538093337255465
0.8414151433493746	0.04503183402060795	2.216714135790198	3.0581292791395724	2.261745969810806	33.0	2.0	1.3795776504350359	0.014507083187981357
1.5351685100426482	0.8284747859391011	1.0356487712427653	2.5708172812854135	1.8641235571818664	100.0	64.0	2.482325429885332	0.013249416802584398
1.123621146960763	0.4795300609177513	1.6008058518654118	2.724426998826175	2.080335912783163	70.0	34.0	1.7019096948273973	0.01111818098684886
1.34061400669075	0.5097471309873616	1.8632735812086507	3.2038875878994006	2.3730207121960123	66.0	29.0	1.7194939166266356	0.012030523258203514
0.657660080792088	0.11687069469915246	2.196073836713418	2.853733917505506	2.3129445314125703	37.0	-4.0	1.299470841916829	0.010497896176784054
2.0755428682682857	0.7639094919921741	1.9357708205339788	4.0113136888022645	2.699680312526153	93.0	42.0	2.072204853101232	0.011425724254087933
1.8968640950657776	0.8195345693805705	1.5750694699361463	3.471933565001924	2.3946040393167167	101.0	53.0	2.2043050362360694	0.011403238808122005
1.21786863244927	0.48143750233053995	1.8117803446680938	3.029648977117364	2.2932178469986337	49.0	22.0	1.6721944169630427	0.015452970655986394
2.276813854985322	0.9096912021695456	1.1396064895495854	3.4164203445349073	2.049297691719131	117.0	62.0	2.9978947784732277	0.013654739205021544
2.1717796095345943	1.1440117413335056	0.9457052766029874	3.1174848861375817	2.089717017936493	168.0	111.0	3.2964655725890806	0.010304910265357022
2.0062216108301643	0.5728692428271254	1.6390808854843728	3.645302496314537	2.211950128311498	105.0	39.0	2.2239918289555893	0.011087995072555186
0.8395578655960059	0.44972117417825475	1.1403435314949617	1.9799013970909676	1.5900647056732164	79.0	47.0	1.7362324092770243	0.010204616378792913
0.654646629711058	-0.20521874258049033	2.356622380631297	3.011269010342355	2.1514036380508066	31.0	-2.0	1.2777902115720763	0.01178836643722873
1.5816285764014644	0.7754309874934207	1.3618151760482962	2.9434437524497605	2.137246163541717	119.0	69.0	2.1614120654691344	0.009423509686960981
2.7329470790397483	0.8782424949817333	1.4649347480343955	4.197881827074144	2.343177243016129	131.0	58.0	2.865575980573014	0.011683270382555665
1.6641047771559254	0.5645791162086398	2.311537686892979	3.9756424640489043	2.8761168031016187	68.0	27.0	1.7199124576647975	0.011676643800486565
0.3621608690376663	0.15869449372226518	1.4026251796869775	1.7647860487246438	1.5613196734092427	31.0	14.0	1.2582021728131882	0.01104545862292914
1.0887792318946994	0.3325232321804743	1.9538278599263272	3.0426070918210266	2.2863510921068015	63.0	22.0	1.557254430764312	0.010306527052345275
1.5683977202966286	0.5664298993951007	1.2321122031701326	2.800509923466761	1.7985421025652333	90.0	41.0	2.27293416643489	0.013309616835408575
2.4070306248446247	0.8734455456241479	1.355268157576274	3.7622987824208987	2.228713703200422	118.0	57.0	2.7760548799060514	0.012590052041678903
3.817099360224042	1.4243159117096251	1.0898927731034758	4.906992133327518	2.514208684813101	181.0	100.0	4.502270548463984	0.012059181962186432
0.9583323692393928	0.6253084040845085	2.0010392444963907	2.9593716137357835	2.626347648580899	60.0	41.0	1.4789173285207506	0.009568498441315354
1.1894845298196655	0.4798981548939205	1.7715250453636473	2.9610095751833128	2.251423200257568	76.0	35.0	1.671446634600357	0.009881297250623842
1.038591980885266	0.5871434938225073	1.5958527445678639	2.63444472545313	2.182996238390371	73.0	45.0	1.650806902090771	0.010044046881066956
1.2227584971296253	0.30862168557330927	2.0391269800155922	3.2618854771452175	2.3477486655889015	51.0	15.0	1.5996480401236588	0.013555090269442925
1.3518129464719801	0.2900982171817468	2.37277999179276	3.72459293826474	2.6628782089745067	44.0	11.0	1.5697169358928278	0.015128009862410073
2.0765587647983352	0.6909875943428865	1.497189935999786	3.573748700798121	2.1881775303426725	95.0	41.0	2.3869708277271187	0.013352988666862044
0.7045161358651633	0.05393579046438157	1.095952755190794	1.8004688910559572	1.1498885456551755	63.0	6.0	1.6428344036988294	0.011551404277289406
1.252321236688037	0.44716648756043176	1.9961444459675812	3.248465682655618	2.443310933528013	54.0	22.0	1.6273700479030242	0.01325551590455868
0.5143347345472531	-0.4284868148642902	2.3218121687007107	2.836146903247964	1.8933253538364205	26.0	-17.0	1.2215229730814425	0.01154723986026095
0.3006964817145912	0.1078868777180455	2.0135457326163384	2.3142422143309296	2.121432610334384	25.0	9.0	1.1493368026580035	0.008366734523003985
1.147186895623792	0.43305496524475195	1.5207287737487256	2.6679156693725177	1.9537837389934776	84.0	37.0	1.7543665349317215	0.009770484307778729
1.0078992594376541	0.5142577486900048	2.006030678891651	3.013929938329305	2.5202884275816557	67.0	37.0	1.5024346187938298	0.00889851834505925
0.7396102042630543	0.19570224679356918	1.7903514668716638	2.529961671134718	1.986053713665233	51.0	15.0	1.4131089442205436	0.009977453902649706
2.192199274805115	1.0156920379093708	1.453336114443346	3.645535389248461	2.469028152352717	119.0	68.0	2.508391109956534	0.011243748403543221
2.5461691780850098	0.9388019014731788	1.257562902519204	3.8037320806042136	2.196364803992383	132.0	66.0	3.024685344156077	0.012189198989803432
2.18350372573075	0.8078135363401266	1.3667572127227017	3.550260938453452	2.1745707490628283	112.0	54.0	2.597579808180428	0.012406919596844309
2.02812040729825	0.5209826935348865	1.909652066164412	3.9377724734626622	2.4306347596992985	97.0	32.0	2.0620366103505887	0.010875728616746473
0.9823430046884165	0.032701624056713285	2.1891574001837317	3.1715004048721482	2.221859024240445	51.0	2.0	1.448731098369615	0.010695796769534848
1.0664310235937342	0.44192168699859113	1.7312968423123634	2.7977278659060976	2.1732185293109545	58.0	27.0	1.6159723725767225	0.012147412865052321
1.4798948627819635	0.6097681703295552	1.8448459303906586	3.324740793172622	2.454614100720214	67.0	32.0	1.8021780238681426	0.012874871687694241
3.1600542808060768	1.2805042147194063	1.2322561491406026	4.392310429946679	2.512760363860009	199.0	111.0	3.5644459417061585	0.009260999198225272
3.0838310057936384	0.9081333589839451	1.3028968209122516	4.38672782670589	2.2110301798961967	102.0	44.0	3.3669034694815103	0.01734081543656909
3.5953812935116005	1.1057549774487032	1.598597819764039	5.193979113275639	2.704352797212742	131.0	58.0	3.2490843219355177	0.013077178351765032
3.628168939678768	0.7861994061194515	1.7464847525789298	5.374653692257698	2.5326841586983813	125.0	41.0	3.077412318842903	0.013078368969764116
3.311160893918646	0.9040955320171258	1.1947416465384357	4.505902540457082	2.0988371785555615	140.0	59.0	3.771445109921615	0.013777823229606133
0.3408466524411746	-0.2400865840285593	1.8360755376025202	2.176922190043695	1.5959889535739609	24.0	-10.0	1.185638687222117	0.010681062106908038
0.7781049322936036	0.3999814863258999	2.316109862931531	3.0942147952251347	2.716091349257431	41.0	22.0	1.3359533780097745	0.01044674154096312
1.7419973491869651	0.7985775392493787	0.8411504925677148	2.58314784175468	1.6397280318170935	159.0	94.0	3.070969897276414	0.010244901079623423
3.0961302333407055	0.9170930382952298	1.170065382713312	4.266195616054017	2.087158421008542	153.0	68.0	3.6461172846264054	0.012278690587392293
1.0170540600668088	0.4586957045716429	2.1111394032046413	3.12819346327145	2.569835107776284	65.0	32.0	1.4817559932437212	0.008864185824556194
0.5396054266498465	0.16001424149416765	2.4086668241631064	2.948272250812953	2.568681065657274	23.0	7.0	1.224026594810319	0.0132561320117925
1.080064637659858	0.6358224872409415	1.4809623492400577	2.5610269868999156	2.116784836480999	70.0	45.0	1.7292991872575851	0.011451992641290414
2.00923759666292	1.0281082972504265	0.9857817929134024	2.9950193895763224	2.013890090163829	169.0	108.0	3.038217393653389	0.009543006563878666
1.218448821426957	0.2530964284196715	2.025426191745225	3.243875013172182	2.2785226201648965	57.0	14.0	1.6015765108562514	0.012133798580277003
1.3019903513658542	0.3638048220778054	1.799620013907255	3.101610365273109	2.1634248359850603	69.0	23.0	1.7234807022061456	0.01154889919052387
3.338575820059206	1.189489222091087	1.0696533270762185	4.408229147135424	2.2591425491673056	162.0	85.0	4.121175558051917	0.012689788337431836
1.2823527902526701	0.3878734006875122	1.1718688414926401	2.4542216317453103	1.5597422421801523	107.0	41.0	2.0942801317417943	0.010060890855070717
0.6986465280561642	0.16649582166624022	2.1836471041525853	2.8822936322087496	2.3501429258188256	35.0	9.0	1.3199447963581505	0.01177875274876987
1.0369544094135719	0.35989444887988986	1.609552171467225	2.646506580880797	1.9694466203471148	70.0	28.0	1.6442502627723534	0.010397534794689724
1.6523099851889427	0.47010295577298766	1.53006098373191	3.1823709689208526	2.0001639395048976	83.0	30.0	2.079898123510646	0.012884303228755748
1.7923146608161304	0.6134414855374044	1.5109014289176876	3.303216089733818	2.124342914455092	102.0	44.0	2.186255189459996	0.011172889194461598
2.2249815171605456	0.9298608073441006	1.6518553036461214	3.876836820806667	2.581716110990222	129.0	67.0	2.3469590903327724	0.009615567926340766
0.5616453701808628	0.16396192073940075	2.3989686777880967	2.9606140479689596	2.5629305985274975	36.0	11.0	1.2341195095130264	0.008670917393625594
0.5845800017439524	0.09610379168401373	2.139061703940554	2.7236417056845066	2.235165495624568	29.0	0.0	1.2732880499272397	0.012448529651093882
3.5366836260305403	0.7648370670791351	1.361536391796367	4.898220017826907	2.126373458875502	113.0	39.0	3.597568193799326	0.01649126816311512
1.4823660037062036	0.5634833740587681	1.4693587132334032	2.951724716939607	2.0328420872921713	102.0	47.0	2.008852358757364	0.00996407462016653
1.7549053813571975	0.6487715660896054	1.1812638265327713	2.936169207889969	1.8300353926223767	105.0	50.0	2.4856167961294227	0.012630806686247718
0.29259352974525976	0.26211878179829595	3.06401484275489	3.35660837250015	3.326133624553186	11.0	9.0	1.095493509255388	0.013158093645702125
1.6736320591561498	0.5866940381372463	2.123655235849008	3.797287295005158	2.7103492739862545	82.0	34.0	1.7880902845734536	0.01035085905155025
0.4931541871240577	0.20174896432010847	2.0527877623519095	2.545941949475967	2.254536726672018	27.0	-1.0	1.2402363245575099	0.011946732671868463
0.5866978059318151	-0.1179477032638876	1.6641297337304297	2.250827539662245	1.5461820304665421	38.0	-15.0	1.352555329094825	0.011775340856941471
2.807285375670434	1.1298251902166117	1.6023571151779108	4.409642490848345	2.7321823053945224	130.0	68.0	2.751972359394266	0.011321441703806863
1.5829041613689439	0.7585054865703607	1.5122463376500577	3.0951504990190015	2.2707518242204183	75.0	42.0	2.0467237525790174	0.0139637350562782
2.954553955600341	0.9626171430127692	1.4656582183071476	4.420212173907489	2.428275361319917	130.0	59.0	3.01585466427015	0.01234547989145384
1.5066925457488778	0.6229642908062885	1.4882597329166645	2.9949522786655423	2.111224023722953	101.0	50.0	2.0123854811257234	0.010089066860779797
0.30520596539951983	-0.002555051066388536	2.053503926259457	2.358709891658977	2.0509488751930687	17.0	0.0	1.1486269207945783	0.012494392513178467
1.052469441206853	0.43097940727192463	1.828496412051474	2.880965853258327	2.2594758193233986	59.0	27.0	1.5755928391601486	0.011308530435185737
1.7858158007544842	0.7084632814861689	1.8229363960260396	3.608752196780524	2.5313996775122085	105.0	50.0	1.9796369224112933	0.009473421686746916
2.46048485337635	0.9849933989647957	2.1638230506001053	4.624307903976455	3.148816449564901	84.0	41.0	2.1371007683340695	0.013200661872231213
0.6180296117001667	-0.21643153983109986	1.912328173227008	2.530357784927175	1.6958966333959082	33.0	-8.0	1.3231817741079746	0.012625352114251007
1.7489311595590709	0.33137763278097565	1.9185488931387156	3.6674800526977864	2.2499265259196912	62.0	15.0	1.9115906119535204	0.015324157171627327
1.7747789993826373	0.745082003260751	1.5308799632670633	3.3056589626497006	2.2759619665278144	100.0	51.0	2.1593195037937964	0.011217946743256242
2.247605613172057	0.6224294575212799	1.8043021378684152	4.051907751040472	2.426731595389695	102.0	37.0	2.245692484645258	0.01155604341469092
1.2802665187443325	0.6819129922107929	1.0236802499129127	2.3039467686572452	1.7055932421237057	117.0	73.0	2.250650795356507	0.010089157152184265
1.836081264241868	0.46882485640801264	2.2308266802517474	4.066907944493615	2.69965153665976	86.0	27.0	1.8230497153793532	0.010192398880601687
1.887081662710746	0.7721625046324193	0.9750906435622763	2.862172306273022	1.7472531481946956	121.0	65.0	2.935288452586022	0.012945852373527113
0.8603043046364334	0.6279469779217133	1.5450294612547382	2.4053337658911715	2.1729764391764514	62.0	47.0	1.5568206472501627	0.010468897524983471
0.34852430596591466	0.04933102410732415	2.0655451876380497	2.4140694936039644	2.114876211745374	20.0	-9.0	1.168732356015146	0.011839188697437652
0.934419919321168	0.3507736843321563	1.9649182628797852	2.899338182200953	2.3156919472119415	46.0	19.0	1.4755515468372113	0.012472318237335273
0.9421222385234356	0.3825148907108513	1.8262230226040659	2.7683452611275015	2.208737913314917	71.0	32.0	1.515885643134668	0.008573727459614195
2.114991058229978	0.7945488952622448	1.2651594228103342	3.3801504810403125	2.059708318072579	124.0	61.0	2.67171901034566	0.011526571421717594
0.67331156703586	0.39715892345210513	1.7728010263884042	2.4461125934242642	2.1699599498405093	44.0	27.0	1.3798009799258453	0.01080139977223648
2.0886288020413906	0.8593784030082572	1.5514364738975164	3.6400652759389067	2.4108148769057736	90.0	46.0	2.346254801393408	0.013824266262934003
1.4760608671748077	0.4596692855219595	1.6757220152392687	3.1517828824140763	2.135391300761228	87.0	33.0	1.8808506743668028	0.010597503652224003
2.3645938229778984	0.7043343719487367	1.0284172943327679	3.3930111173106665	1.7327516662815046	136.0	59.0	3.2992552109035036	0.012756595411775708
2.274908477365538	0.4135425377940152	1.5327686246125911	3.8076771019781295	1.9463111624066063	81.0	21.0	2.484182570569334	0.01640964007193539
3.4755179153390205	1.193856449032791	1.310246963623732	4.785764878962753	2.504103412656523	177.0	88.0	3.6525670440989453	0.010618811104689988
1.6414663611795604	0.951352161599023	1.535460719712773	3.1769270808923333	2.486812881311796	96.0	63.0	2.0690383284351404	0.011041688116026804
0.25202299038361087	0.18811335344862323	1.8293663092288512	2.081389299612462	2.0174796626774745	17.0	-3.0	1.1377651862900264	0.011637677672976536
1.5838203569993468	0.5582766720763384	1.592083939352524	3.1759042963518707	2.1503606114288623	86.0	37.0	1.9948095812356867	0.01172060044136597
1.1073971630661457	0.33505582592855054	1.4297894049081434	2.537186567974289	1.764845230836694	80.0	29.0	1.7745176732074681	0.01047375877100396
1.2407989628958622	0.5732702927695175	1.2604924848031416	2.501291447699004	1.833762777572659	118.0	64.0	1.9843763273921027	0.008450304716429793
0.6113518547965993	0.2573330478087279	1.421672891908345	2.0330247467049443	1.679005939717073	44.0	20.0	1.4300228683237868	0.012000888794417918
0.8774919012053499	-0.5948723075194722	2.6435476773859747	3.5210395785913247	2.0486753698665026	32.0	-27.0	1.331937232950927	0.013339551533589412
1.1845440116790276	0.5431831905317226	1.2321825999272609	2.4167266116062884	1.7753657904589835	84.0	45.0	1.961338044985341	0.011708894115786555
1.337644684232429	-0.5134541276834783	3.10569712705915	4.443341811291579	2.5922429993756717	44.0	-3.0	1.430706739745441	0.012016929879110976
1.2792583278792855	0.6668300425436144	1.7029840102409866	2.982242338120272	2.369814052784601	79.0	46.0	1.7511863412612192	0.010363238552283119
1.9677934441149842	0.49978404582511526	1.7517991302274298	3.719592574342414	2.251583176052545	70.0	23.0	2.1232985621242504	0.015743583280160532
2.739331291957551	0.5485345081644368	1.6000568445546786	4.3393881365122295	2.1485913527191154	89.0	26.0	2.712021233045599	0.016356459928566196
0.9667298511197964	0.7423166335022948	1.7962086127049721	2.7629384638247685	2.538525246207267	62.0	49.0	1.5382057764793615	0.010184401894338729
0.38500916891565273	0.1486064366769697	1.3277130721203447	1.7127222410359975	1.4763195087973144	37.0	15.0	1.2899791958068145	0.010204105519772442
1.2781831979677833	0.4101057307845788	2.5309356744629086	3.809118872430692	2.9410414052474874	50.0	18.0	1.505023976256934	0.012036458581108437
2.2808389010752865	1.082219669181966	1.1208466967818458	3.4016855978571323	2.203066365963812	162.0	98.0	3.034924943459252	0.009948203960996634
1.9848788954368934	0.8731150106256405	1.341939630124948	3.3268185255618414	2.2150546407505884	126.0	69.0	2.479111914484619	0.010478587203514892
1.668568777706319	0.5608735726615455	1.4161425894554407	3.0847113671617596	1.9770161621169862	99.0	42.0	2.178249132630031	0.01146090784367983
1.7279401770795348	0.6292583434141843	1.8321956138978104	3.5601357909773452	2.4614539573119947	82.0	36.0	1.9430980862373737	0.011831589246935413
1.1876985736128547	0.6502173495599459	1.1406504114311415	2.3283489850439962	1.7908677609910875	88.0	55.0	2.0412467849134277	0.011832765671921935
0.2610953998363783	-0.18575554030232277	2.1120720564783997	2.373167456314778	1.926316516176077	15.0	-11.0	1.1236204981906348	0.012011060634242522
0.6636469840058201	0.3842591683345298	1.7073616224587485	2.3710086064645686	2.0916207907932782	56.0	34.0	1.3886973768627358	0.008613313515121302
1.3782503131133659	0.34574435832664685	2.0278150068114966	3.4060653199248625	2.3735593651381435	57.0	17.0	1.6796726074537265	0.013360358182558254
1.4879092227938486	0.564267974633889	1.521269178127015	3.0091784009208635	2.085537152760904	81.0	37.0	1.9780709713883515	0.012301177370153285
1.9004134925420437	0.8202534077390962	1.8297404242197868	3.7301539167618305	2.649993831958883	76.0	39.0	2.038624641717905	0.013701282213927558
1.6149085985405627	0.6847690601172554	1.5792663884098195	3.194174986950382	2.264035448527075	89.0	45.0	2.0225688398058237	0.011547600077405162
1.106729976302347	0.23162289211135634	1.745903407465235	2.852633383767582	1.9775262995765914	68.0	17.0	1.6339010345991232	0.010571949284744087
1.6805723475992849	0.7182386840812336	1.3264206811622838	3.0069930287615687	2.0446593652435174	88.0	46.0	2.2669979980458943	0.013572219736270305
3.7131513093995903	0.9359459472662655	1.6108406879861856	5.323991997385776	2.546786635252451	108.0	41.0	3.3051015144406595	0.016118640972212588
1.3276815599119631	0.8910241590056867	1.6046276256486398	2.932309185560603	2.4956517846543265	87.0	63.0	1.8274078912079514	0.010113938259430083
0.4969708094132379	0.10337720501886416	2.1538521062072657	2.6508229156205037	2.25722931122613	32.0	7.0	1.2307358095669612	0.009661971139910845
2.046483223682017	0.7372885791513866	1.792243486160482	3.8387267098424993	2.5295320653118685	85.0	38.0	2.1418555790464566	0.013081681016467927
1.514220435927094	0.7136598871851281	1.6481280542118804	3.1623484901389745	2.3617879413970084	97.0	53.0	1.9187516904753983	0.009793416891033179
1.683106063057758	0.6618792907298752	1.309789745354142	2.9928958084119	1.9716690360840172	100.0	49.0	2.28502003396177	0.012042493072709725
2.3370754650223837	1.0550815347899576	1.6130034433567224	3.950078908379106	2.66808497814668	106.0	59.0	2.448896761285791	0.012306018620487417
2.749404200970041	1.0081292502832395	1.324733954317953	4.074138155287994	2.3328632046011926	136.0	68.0	3.0754387641445993	0.012005868521140821
3.7969980502498952	1.2919503730104858	1.634363772622952	5.431361822872847	2.926314145633438	168.0	81.0	3.3232270035918514	0.010374759546526788
0.733055868451969	0.34915788116813506	1.7853814540860655	2.5184373225380345	2.1345393352542006	53.0	27.0	1.4105878140350794	0.009544163106570438
2.6194967749521263	1.0073230648455802	1.7937499565912771	4.413246731543404	2.8010730214368573	102.0	50.0	2.46034666946002	0.012860015935613036
1.9625005005637042	0.6179571526966341	1.5742411466824406	3.536741647246145	2.1921982993790747	111.0	45.0	2.2466327059862983	0.01061603893363515
2.8168419571293084	1.2798423123073213	1.5609122623013763	4.377754219430685	2.8407545746086975	94.0	54.0	2.8046126135086005	0.015997865727574133
1.6640412745061453	0.5564764537145404	1.8298532575734965	3.4938945320796417	2.386329711288037	96.0	39.0	1.9093850928313079	0.009822190535819003
1.1672147404371398	0.6271564566689354	1.2774133599536983	2.444628100390838	1.9045698166226337	92.0	56.0	1.9137329990657426	0.010289995180045385
0.7237165088372048	0.16263666106972385	1.2026602837328841	1.926376792570089	1.365296944802608	79.0	21.0	1.601763040341611	0.008713599177953998
2.2045270214819084	1.0227235587776653	1.6130802752288156	3.8176072967107237	2.635803834006481	101.0	57.0	2.3666567345318237	0.012428504693588003
1.3309017805726155	0.6485695409586982	1.5147630866291621	2.8456648672017777	2.1633326275878604	70.0	39.0	1.8786204207908859	0.013183675313539927
1.650327889349305	0.509796344368745	1.6000570286827471	3.250384918032052	2.109853373051492	83.0	32.0	2.031418168081136	0.012469356700506796
1.5592933172610839	0.3869397486939372	1.5040550687199095	3.0633483859809933	1.8909948174138467	88.0	28.0	2.0367262141459936	0.011796000687500157
1.5301272970467248	0.4806909571941391	2.0114373985133125	3.5415646955600373	2.4921283557074516	67.0	25.0	1.7607133576106657	0.012366061499434533
1.7092130020640424	1.0193926351336757	1.3105317214722936	3.019744723536336	2.3299243566059693	104.0	71.0	2.3042133769519575	0.011691983696898174
1.6265909666197536	0.7812318964410954	1.4150350041927082	3.0416259708124618	2.1962669006338036	95.0	54.0	2.1495058156160174	0.01174473418748789
0.6932720691006795	0.24884270631929595	1.5057879297952625	2.199059998895942	1.7546306361145585	53.0	21.0	1.4604048520929116	0.010507083983590437
1.0917964975878993	0.7116765150500721	1.4044263351210038	2.496222832708903	2.116102850171076	95.0	67.0	1.7773967706849012	0.008827295447695725
1.7335249771297385	0.7185611992061971	1.435163438714163	3.1686884158439015	2.15372463792036	81.0	41.0	2.2078937704007378	0.014283384507639522
1.1178121965862802	0.46976003662071997	1.58112780152274	2.69893999810902	2.05088783814346	75.0	36.0	1.7069714386843027	0.01042485025900458
2.4565174433953505	1.3077113099261208	1.661668688141776	4.118186131537127	2.9693799980678968	112.0	71.0	2.4783437040884753	0.011796182690088976
1.0958807733304743	0.12368326194623003	1.947122750638276	3.0430035239687503	2.070806012584506	59.0	8.0	1.5628205889799394	0.011106071847863143
1.1885225025801092	0.5053475374117753	1.72506904026102	2.913591542841129	2.2304165776727953	52.0	25.0	1.68897097730087	0.01482636348185392
0.4583542381028083	0.2317978109036989	1.6296866481135368	2.088040886216345	1.8614844590172357	42.0	22.0	1.281252987274199	0.008720862641524291
0.5044298825041564	-0.37431166375861546	2.3044642246512486	2.808894107155405	1.930152560892633	29.0	-21.0	1.2188924770921516	0.010198959508240265
0.4002990238640858	-0.6270006215192367	2.858594588155302	3.2588936120193877	2.231593966636065	19.0	-14.0	1.1400335065079674	0.010504234832705853
0.4128718581794084	-0.5677277310395827	2.4819703970252096	2.894842255204618	1.9142426659856269	18.0	-8.0	1.1663484216710482	0.013058754543682468
1.7158785201188063	0.4729056214516447	1.9914068142290486	3.707285334347855	2.4643124356806934	71.0	24.0	1.861641382292392	0.012808216939666193
3.208565669210066	0.762255411120307	1.539014184583449	4.747579853793515	2.301269595703756	99.0	35.0	3.0848187764289507	0.016583527938656972
1.4619218260102629	0.5772201579031477	1.809989761862646	3.271911587872909	2.3872099197657937	78.0	36.0	1.8076961852567668	0.011092886080071786
2.4216412134756613	0.6904359687170003	1.3859263626251264	3.8075675761007877	2.0763623313421267	101.0	40.0	2.7473087162356555	0.014580190357713732
2.0499527239785467	0.9341049066255696	1.7156256911157095	3.765578415094256	2.649730597741279	86.0	47.0	2.1948717803621935	0.013342784271933273
3.805074555489777	0.9550113363181196	1.318239851298513	5.12331440678829	2.2732511876166326	143.0	57.0	3.886481205784853	0.013792003800582575
3.366049232773871	1.057681066041125	1.2150984375898148	4.581147670363686	2.27277950363094	143.0	67.0	3.7701864545645645	0.013483351223514158
0.9015392153680684	0.3977934440600821	1.493498333141253	2.3950375485093214	1.8912917772013351	73.0	36.0	1.603642598965527	0.009463231203953567
1.6709180483652193	0.8065614888194568	2.040076523766956	3.7109945721321753	2.846638012586413	89.0	49.0	1.819046750893396	0.009808893429912967
2.4598453978976624	1.332718616897067	1.3157806017191382	3.7756259996168007	2.6484992186162053	111.0	73.0	2.869495107834651	0.01382542649795497
1.276075090028215	0.6628321686830871	1.7434437443986266	3.0195188344268415	2.4062759130817137	76.0	44.0	1.7319278836085283	0.010565051445308197
1.1066540279746118	0.20911180462804468	2.084339917408129	3.1909939453827407	2.2934517220361736	50.0	11.0	1.530937405522	0.012539087703587573
1.3482062961142383	0.40233242998052554	1.5413413122306157	2.889547608344854	1.9436737422111412	85.0	31.0	1.8746967887100399	0.010793538983923084
3.5157096427090364	1.302577850335248	1.407102981600233	4.92281262430927	2.709680831935481	173.0	90.0	3.4985446613941384	0.010504389004602243
1.7532874625170178	0.7426202039853962	1.1328665564926261	2.886154019009644	1.8754867604780223	129.0	69.0	2.5476557697538755	0.010540393428951217
2.3969376499504276	1.117324145444269	1.6213355135823	4.018273163532728	2.738659659026569	117.0	67.0	2.4783723849078307	0.011287870467244577
2.337897557755527	0.8461890378003589	1.1092397789502773	3.4471373367058042	1.9554288167506362	143.0	71.0	3.107657516545235	0.011519912101514838
0.9538924488317595	-0.3475066639599329	2.641844080763138	3.5957365295948973	2.294337416803205	37.0	-11.0	1.3610706838369555	0.012353944210648376
1.9058065548881333	0.9011720054549448	1.6498464258319103	3.5556529807200437	2.551018431286855	75.0	42.0	2.1551417908046555	0.014970037703228477
1.2641995720729158	0.4958501085609859	1.5352028426521698	2.7994024147250856	2.0310529512131557	89.0	41.0	1.8234739651008742	0.00984874547210415
1.7113916686843298	0.7890782824373483	1.5246330660548832	3.236024734739213	2.3137113484922316	84.0	46.0	2.122494131071616	0.013081452585232252
2.6983447239135225	0.9768447056305936	1.1686717625946004	3.867016486508123	2.145516468225194	131.0	66.0	3.308898709012061	0.013279624069155851
2.902632789856346	1.1056151935903331	1.2875574499769875	4.190190239833334	2.3931726435673206	159.0	83.0	3.254371476712146	0.010774550251316848
0.4630202059943529	-0.18402434145382474	2.323848437489139	2.786868643483492	2.1398240960353143	23.0	-15.0	1.1992471619597682	0.01191495569906242
0.5036606019247571	0.1252665314075605	2.1306343802087566	2.6342949821335138	2.255900911616317	27.0	7.0	1.2363899722088447	0.011774379166131468
1.0077292634861788	0.32182229066597845	1.4184255692826435	2.4261548327688223	1.740247859948622	64.0	24.0	1.7104562166034762	0.01229176468567639
1.2040102604883707	0.42064170845383675	1.670328215392332	2.8743384758807027	2.0909699238461688	59.0	24.0	1.7208225601371219	0.013501695583761129
1.0255791935409022	0.6223013799627641	1.3476151346064256	2.373194328147328	1.9699165145691897	80.0	53.0	1.7610327067456282	0.010334451947385645
1.7494730201566497	0.6509731690562952	1.5921259968487291	3.341599017005379	2.2430991659050243	94.0	43.0	2.0988282482789398	0.011500904436122486
2.3475423675394493	1.0514833095902552	1.986434631399632	4.3339769989390815	3.037917940989887	102.0	55.0	2.1817868710259964	0.011143665130064623
1.4058009699240566	0.2656060031341252	1.9070587237313281	3.3128596936553847	2.1726647268654533	73.0	17.0	1.7371566236688734	0.011065664370127046
2.0127754578287753	0.687459837690956	1.6019339177832588	3.614709375612034	2.2893937554742148	99.0	43.0	2.256465972462856	0.011980255335243483
2.587980442036459	0.9200522346186988	1.017710546965801	3.60569098900226	1.9377627815844998	166.0	84.0	3.542943521369859	0.011060293741859378
0.39887455506455693	0.14263505116153108	1.9512534342622587	2.3501279893268157	2.09388848542379	30.0	11.0	1.2044196556227285	0.00925303991531878
2.3294965574030178	1.0999127115115144	1.394866850222046	3.724363407625064	2.4947795617335604	126.0	74.0	2.6700494079647745	0.01133493150823528
1.7790120425453124	0.7831547319963255	1.9937548672692804	3.772766909814593	2.776909599265606	78.0	40.0	1.892292263081425	0.011949804273032823
1.0555291575855201	0.18161836106758233	1.8831795265965448	2.938708684182065	2.064797887664127	59.0	12.0	1.5605037346031312	0.011069169136624217
0.7687119784789016	0.2298642384441001	1.2877961674494993	2.056508145928401	1.5176604058935994	58.0	20.0	1.5969205359582237	0.011847237278549406
2.292933508216536	0.7590175601859175	1.47830377265705	3.7712372808735863	2.2373213328429675	114.0	50.0	2.5510570632552065	0.011956594426449176
2.3816070048233673	0.7463291599667454	1.6347407862309176	4.016347791054285	2.381069946197663	99.0	41.0	2.456871343079679	0.013232880727319513
2.1221258660784503	1.0261482433837386	0.9153362371391728	3.037462103217623	1.9414844805229114	202.0	126.0	3.318411289725647	0.008609416455392305
1.1483094919763606	0.6140923392214532	1.7114835358505391	2.8597930278268997	2.3255758750719924	73.0	43.0	1.6709439313453265	0.010286990617583633
1.6935904229516199	0.5399127631854461	2.077113267347239	3.7707036902988587	2.617026030532685	81.0	31.0	1.8153577609730303	0.010753173685539937
2.0019230816534517	0.9932700753995232	1.4845527720737903	3.486475853727242	2.4778228474733135	126.0	75.0	2.3485024711226266	0.009853928892940837
1.8285558638778834	0.7140824402956429	1.206851531071573	3.0354073949494564	1.920933971367216	128.0	64.0	2.515145663571636	0.01047749571266735
3.259091959543592	1.2966611871409115	1.1346649016419406	4.393756861185532	2.431326088782852	152.0	85.0	3.8722946790964055	0.012935024800931418
1.90191964817218	0.8605726435991763	1.5375136942636753	3.4394333424358554	2.3980863378628516	97.0	53.0	2.23700989153337	0.012099704538233476
2.1649443316990356	0.7462032885573398	1.7190854832586115	3.884029814957647	2.4652887718159513	105.0	46.0	2.259358160360517	0.011306855666221584
0.22572237804109707	0.03989766108141035	1.4657776939998697	1.6915000720409668	1.50567535508128	17.0	3.0	1.1539949604671205	0.012914807731362029
1.1022692871479522	0.7309504579725239	1.498464773377807	2.600734060525759	2.229415231350331	69.0	49.0	1.7355990656111593	0.01169755462600666
1.0693454021303348	0.5095056040756727	1.6956689927106987	2.7650143948410335	2.2051745967863714	68.0	36.0	1.6306333410159715	0.010528842070679821
0.8285639197214525	0.3366844848362198	1.8213498532889705	2.649913773010423	2.1580343381251903	43.0	19.0	1.4549174988128954	0.012879460650977958
2.483118421150529	1.2874684127293612	1.6435181488888342	4.126636570039363	2.9309865616181954	149.0	93.0	2.510855491817562	0.00897418242597655
2.0109356102367535	0.5862568016702758	1.6879555783366602	3.698891188573414	2.274212380006936	101.0	38.0	2.1913439168928623	0.011318159235151226
1.704062802026595	0.6363500921761693	1.5300444203315908	3.234107222358186	2.16639451250776	100.0	46.0	2.1137342023424988	0.010907009820609324
0.6159380936369663	0.06335406870058602	1.7857458252051923	2.4016839188421586	1.8490998939057783	35.0	4.0	1.3449192404334427	0.012574104252512848
0.8855901378254931	0.43300838307203793	1.8788238790593363	2.7644140168848295	2.3118322621313743	55.0	29.0	1.4713534609049563	0.01031747897345148
0.06442837997984263	-0.44065100377252686	2.1141183053415253	2.178546685321368	1.6734673015689985	4.0	-8.0	1.030475295453929	0.014436639405658412
2.5242302436022817	1.2938002994980198	1.5016674538977783	4.02589769750006	2.795467753395798	147.0	92.0	2.6809515562518884	0.009744829798765602
2.1908668020454996	0.8878476235063841	1.3559382001113391	3.5468050021568387	2.2437858236177233	106.0	55.0	2.6157571206900156	0.013211700851112576
1.0583470833236535	0.0814820753900316	1.5828951175514472	2.6412422008751006	1.6643771929414788	52.0	5.0	1.6686147879215094	0.014483351692289726
1.7269336053495241	0.6253069028668534	1.0151094286924618	2.742043034041986	1.6404163315593152	148.0	71.0	2.701229006979027	0.009752489489793473
4.070497077518887	1.0625714713376704	1.6866478625935173	5.757144940112404	2.7492193339311877	99.0	39.0	3.4133650940391216	0.018073415648637733
2.0305419487315106	0.9850667524349781	1.431400584464689	3.4619425331961997	2.416467336899667	114.0	67.0	2.418570015109283	0.011275701795777514
1.0377579901021559	0.4703985921571765	1.9239535213282593	2.961711511430415	2.3943521134854358	72.0	36.0	1.5393882849029057	0.008765593989004321
1.348838279551803	0.7260630094540399	1.4726440121750841	2.821482291726887	2.198707021629124	74.0	45.0	1.9159296261691778	0.012849925623992984
1.2666903436470365	0.32106610736977115	1.7124721502566904	2.979162493903727	2.0335382576264616	59.0	18.0	1.7396852225930601	0.013772867059874098
1.47057061723818	0.718634117068488	1.729875335889302	3.200445953127482	2.44850945295779	86.0	48.0	1.850102077721215	0.010442410262838655
0.7933162031216088	0.14680832232658947	1.8296800927681875	2.6229962958897963	1.976488415094777	43.0	9.0	1.4335819175478772	0.012372008219586296
2.459586452673635	0.3318946638056737	1.9635711316497928	4.423157584323428	2.2954657954554665	79.0	15.0	2.25260878662801	0.015020471547234458
2.0596783086375625	0.7492007250212709	1.254414935497034	3.3140932441345963	2.003615660518305	140.0	67.0	2.6419433875932454	0.010083450017164292
0.9459729539952308	0.5722427842800919	1.8260185199412062	2.771991473936437	2.398261304221298	50.0	32.0	1.518052223274104	0.012290233111858385
1.5886711418383543	0.8479701184882569	1.8647194811228907	3.453390622961245	2.7126895996111475	98.0	59.0	1.8519625380229812	0.00916551459469119
1.6512077787971537	0.575469564933456	2.0138762666259535	3.6650840454231073	2.5893458315594096	82.0	34.0	1.8199152083775165	0.010665076980522971
1.3419196715181532	0.6708821676917858	1.4880557803520877	2.829975451870241	2.1589379480438735	77.0	44.0	1.9017939308704157	0.012202117516547985
2.794833658972453	1.399018548188492	1.7388587561492275	4.53369241512168	3.1378773043377195	126.0	77.0	2.6072804355666728	0.011060366124414106
2.818336140658923	1.0956682645755291	1.2437896958412618	4.062125836500185	2.339457960416791	149.0	79.0	3.2659265871733125	0.011537110552553652
2.343732201566355	0.8339103516149509	1.2413050223662148	3.5850372239325696	2.0752153739811656	98.0	47.0	2.8881194866179296	0.015774540518645436
2.3838805422210516	1.2435152429661824	1.212522262032685	3.596402804253737	2.4560375049988674	192.0	124.0	2.966050947571626	0.008212269000205505
0.894944023771246	0.3035327589715415	1.567644370761084	2.46258839453233	1.8711771297326256	75.0	29.0	1.5708845963174383	0.008805097272670549
0.10752602086774776	0.03966090688795343	1.9907986491855063	2.098324670053254	2.0304595560734597	9.0	3.0	1.054011499812771	0.009486325951628575
2.0062076510309392	0.6914272838164426	1.1519523115517303	3.1581599625826695	1.8433795953681729	134.0	62.0	2.7415717915687754	0.010939874082306915
0.6055703450422198	0.2545689200700436	2.3797030730452526	2.9852734180874725	2.6342719931152963	30.0	13.0	1.2544730693091408	0.011278672403101557
0.6969104994135193	-0.6413642735232141	2.6738243092758136	3.370734808689333	2.0324600357525995	30.0	-15.0	1.2606418443410266	0.011522705374191571
1.150386711989953	0.3441036347330364	2.026521475138052	3.1769081871280047	2.370625109871088	44.0	15.0	1.567665690249636	0.015084137974318075
1.0144630659939384	0.2439795614378002	2.0883265688906487	3.102789634884587	2.332306130328449	44.0	12.0	1.4857779818090602	0.013284152363442632
1.5694050926842193	0.5371765551914109	1.8373693574745038	3.406774450158723	2.3745459126659147	66.0	27.0	1.8541587385790488	0.013704073254216595
1.6719435947606498	0.8982796663640529	1.3147772697447215	2.9867208645053713	2.2130569361087744	105.0	66.0	2.271655384706549	0.011382153762688382
1.471543940961303	0.3795845664963402	1.8519221766910265	3.3234661176523295	2.2315067431873667	70.0	22.0	1.794603552720895	0.01222703148336866
1.7303073498155552	0.5920856852144325	1.7399476268230047	3.47025497663856	2.3320333120374372	67.0	28.0	1.9944594441471484	0.015090875569548435
2.4605061237331673	1.0673530311775228	1.2753333881721238	3.735839511905291	2.3426864193496466	153.0	86.0	2.9293042482481355	0.010201039766977506
0.8008817051135964	0.13268983266714196	2.1444828597577117	2.945364564871308	2.2771726924248537	38.0	7.0	1.373461462501072	0.01237341705083125
1.1201585297238674	0.2756855613884701	1.8179006865347627	2.93805921625863	2.093586247923233	52.0	15.0	1.6161824669636304	0.013580197794552445
2.34105791199929	0.9714835890769127	1.960803140550254	4.301861052549544	2.9322867296271666	83.0	42.0	2.193928071403602	0.01382336862588443
1.8889091286192485	0.28763159823143614	1.7880339391209112	3.6769430677401598	2.0756655373523474	88.0	18.0	2.056416820336158	0.011955548479142123
1.0714290186571203	0.5506428408678492	1.1948056126562185	2.266234631313339	1.7454484535240677	77.0	45.0	1.896739191135188	0.012151596267401173
0.08458516982730457	0.07375680637679682	1.501638603708963	1.5862237735362676	1.57539541008576	9.0	7.0	1.0563285797384163	0.009882333340883166
1.663832283703732	0.6133650790211445	1.818291333711979	3.482123617415711	2.4316564127331235	77.0	34.0	1.915052639175855	0.01233400063351605
1.6129536065459265	0.9294579907303078	1.803634623717913	3.4165882302638395	2.733092614448221	84.0	54.0	1.8942795759936526	0.011104208112368976
0.7988747728287675	0.08797266921952085	1.582883732138461	2.3817585049672285	1.6708564013579819	44.0	-4.0	1.5046958008403404	0.013708647715896038
1.2430458412798024	0.39968534145229695	1.1869436841101362	2.4299895253899386	1.5866290255624331	80.0	32.0	2.0472660648695618	0.013084792515491174
1.7783057826004782	0.7249400792394187	1.600173920330314	3.3784797029307923	2.3251139995697327	95.0	47.0	2.111320313377807	0.011469632659069818
1.643718072577307	0.9145686582431556	2.0127082012536808	3.656426273830988	2.9272768594968364	103.0	64.0	1.8166698339846103	0.008444080828166025
1.5644411287510702	0.47645717734206716	1.6209763352433106	3.185417463994381	2.097433512585378	98.0	37.0	1.9651227440752523	0.010047622967755134
3.449082466897413	0.993422892084993	1.3030663793372945	4.752148846234707	2.2964892714222875	138.0	60.0	3.6468969820643564	0.013625324429532334
1.5080146046952294	0.39483594270720235	1.4736579228565632	2.9816725275517926	1.8684938655637655	96.0	32.0	2.02331387855064	0.010702317303913493
1.4873228132213587	0.18496880062629772	1.4723029577353046	2.9596257709566633	1.6572717583616023	60.0	10.0	2.010201606542418	0.017073562694962966
1.939072111278155	0.9444901062940865	1.8152927291779828	3.754364840456138	2.7597828354720693	86.0	49.0	2.068187009241327	0.01233372520785635
0.8777471146419036	0.33152597900087266	1.9632676492288927	2.8410147638707963	2.2947936282297654	46.0	19.0	1.447084795079598	0.011847765826644135
1.1389774817348783	0.40809410175131733	1.2051706542347635	2.344148135969642	1.6132647559860809	74.0	32.0	1.9450756851178763	0.013148305386527863
1.09927564769501	0.3046606348473302	1.2834690664307766	2.3827447141257867	1.5881297012781068	62.0	21.0	1.8564878394397197	0.014632391231673397
1.9015029031035382	0.8253396947406839	1.517739188784282	3.41924209188782	2.343078883524966	102.0	54.0	2.2528522141058063	0.01160151165008143
2.0191136342746114	0.3297318961095812	1.3700840735100928	3.389197707784704	1.699815969619674	85.0	20.0	2.4737151342119716	0.01555570682553517
3.632719498662309	1.0421827866528361	1.3662337321960991	4.998953230858408	2.4084165188489353	136.0	59.0	3.658929737317374	0.013862383050145472
2.0948651673247967	1.1878195725010068	1.2792930822391506	3.3741582495639473	2.4671126547401574	128.0	86.0	2.637517779474073	0.01101717180347777
0.6850458852547385	-0.4190726457144438	1.688191324064975	2.3732372093197136	1.2691186783505313	41.0	-45.0	1.4057868770497084	0.012284447315288532
1.371130294009873	0.8051728210864082	1.6298693655819443	3.0009996595918174	2.4350421866683525	112.0	73.0	1.8412516505703582	0.007934115482434698
1.1719196673402439	0.4773364772192217	1.551111865791917	2.723031533132161	2.0284483430111386	87.0	41.0	1.7555352345537778	0.00944082502545315
2.5000166996052133	0.5237464377157455	2.315749857620003	4.815766557225216	2.8394962953357483	80.0	22.0	2.0795711338937917	0.013370709300162813
1.09546682581718	0.5221232371475475	1.4795107424991136	2.5749775683162937	2.001633979646661	67.0	36.0	1.740425056979832	0.012112722616479563
2.324666281482366	0.8713121375975266	1.3794265169453503	3.704092798427716	2.250738654542877	116.0	57.0	2.685241115003492	0.012391753369436176
2.9686159952899156	1.3937422872847476	1.4561752870528806	4.424791282342796	2.849917574337628	145.0	87.0	3.0386391814807054	0.011134898433574117
1.9271101895064517	0.8780557310495696	1.5493272077187958	3.4764373972252476	2.4273829387683654	118.0	65.0	2.2438367956784915	0.009965536291255359
1.345419191939198	0.3580442564288404	2.0054719074582223	3.3508910993974204	2.3635161638870628	51.0	16.0	1.6708741154317195	0.014812060881223997
0.5941711647733883	-0.09947472759778253	1.8838426970769284	2.4780138618503167	1.7843679694791459	31.0	-8.0	1.315403810358124	0.013183525149211936
1.904541284468187	0.5611701832337677	1.6764217457593829	3.58096303022757	2.2375919289931505	93.0	35.0	2.1360752682228368	0.011901766127386821
1.4816180932028384	0.8264842558759398	1.7392385621924054	3.220856655395244	2.565722818068345	85.0	53.0	1.8518774395935529	0.010583197877855988
2.1899401467740445	0.6310738226084367	1.1467042881377305	3.3366444349117748	1.7777781107461672	96.0	39.0	2.909768864936006	0.016220047983231952
1.922098014833697	0.6761267807707714	1.2609404925556271	3.183038507389324	1.9370672733263985	111.0	51.0	2.5243368154020183	0.012144585618570654
1.4848851366558153	0.5614175424576295	1.4279993145791239	2.912884451234939	1.9894168570367534	87.0	40.0	2.0398360289783874	0.011958757984462182
2.947015456238579	1.040326348562524	1.9417159433699362	4.888731399608515	2.9820422919324603	100.0	46.0	2.5177376826416222	0.013455838179537175
2.3177609008048856	1.1809839039750034	1.6183784947521695	3.936139395557055	2.799362398727173	134.0	82.0	2.4321500862255436	0.009640844054118044
0.7477135539795237	-0.06621254093257312	2.3354594555072143	3.083173009486738	2.2692469145746412	36.0	0.0	1.320156940518214	0.011448841361451597
0.5957211686248474	0.06176726257926224	1.8503798730697574	2.4461010416946047	1.9121471356490196	35.0	4.0	1.3219453352767794	0.011843015298438491
2.765883260781494	1.1127057704612806	1.1934883044085143	3.959371565190008	2.306194074869795	143.0	78.0	3.3174783117395097	0.012183711506341401
0.9677594451060378	0.3377008210168597	1.3430585661037395	2.3108180112097774	1.6807593871205992	76.0	31.0	1.7205638454870529	0.010438419034570604
2.6379298253944894	0.7061771226314573	1.6306024296371353	4.268532255031625	2.3367795522685926	116.0	43.0	2.6177639487398032	0.012072478358358726
0.8406439313131122	0.083637456067575	1.746159250110501	2.586803181423613	1.829796706178076	43.0	5.0	1.4814245500574557	0.013499646446369098
3.8886477599841305	1.275186551597187	1.179727761876695	5.068375521860825	2.454914313473882	186.0	93.0	4.296224676274568	0.01136794293395286
1.7328697473288863	1.0190974047315304	1.6442573636396305	3.377127110968517	2.663354768371161	98.0	65.0	2.053892040047252	0.010704745880503682
1.3142159179891661	0.3628221625179482	1.2870370132411748	2.601252931230341	1.649859175759123	86.0	30.0	2.02111742278456	0.011942978138598825
2.0636836418447655	1.291531090836262	1.4556836607157706	3.519367302560536	2.7472147515520327	140.0	100.0	2.417673150792966	0.009162728183136182
1.4997046581704898	0.5496024530418493	1.4788817055839167	2.9785863637544066	2.028484158625766	114.0	51.0	2.0140802016198798	0.008939125073299891
1.3776383915989583	0.5622507937061025	1.1447783058574679	2.522416697456426	1.7070290995635704	88.0	44.0	2.2034106381558938	0.013100441237364584
0.29003886786391275	0.18237464187734442	2.238504658834895	2.5285435266988077	2.4208793007122393	15.0	9.0	1.1295681323329805	0.012555092329419006
0.9435220942091664	0.5468057718131911	2.1595661573391247	3.103088251548291	2.706371929152316	54.0	33.0	1.4369035377789547	0.009867230453390944
1.3169767889966062	0.21672689438488124	1.8355155486839259	3.152492337680532	2.052242443068807	64.0	13.0	1.7174969397240385	0.01238583378441451
1.2756185203654766	0.5580873205499637	1.246315235020893	2.5219337553863697	1.8044025555708567	81.0	42.0	2.0235119370454395	0.01271076699673717
2.2172604223005346	0.8787005091733557	1.9282558894167527	4.145516311717287	2.8069563985901085	107.0	52.0	2.149878724328024	0.010417502632103266
1.897410640241363	0.9744597717458643	1.3429818669638658	3.240392507205229	2.31744163870973	135.0	83.0	2.412834146845867	0.009483050381591593
4.945784865984572	1.6605418616692735	1.156151859100591	6.101936725085163	2.8166937207698646	171.0	91.0	5.277798653398406	0.014117272431091317
0.5370666783340936	0.5235518291843575	1.2663164407953313	1.803383119129425	1.7898682699796888	48.0	46.0	1.424117275139206	0.010852509706437653
1.3876992076904298	0.6293301642162037	1.6987531636487092	3.086452371339139	2.328083327864913	73.0	38.0	1.816892787831415	0.011964906816295055
1.1982280331038806	0.4444038901062173	1.5836851928045024	2.781913225908383	2.0280890829107197	83.0	36.0	1.756607461222753	0.00991209557017523
1.5650995234702085	0.5591881442591584	1.2660294056652992	2.8311289291355077	1.8252175499244576	100.0	45.0	2.2362268336474758	0.011727944814663384
1.8690288275140574	0.9285903537759053	1.4309919897835957	3.300020817297653	2.359582343559501	138.0	82.0	2.3061071206951373	0.008798974664190816
2.4853538230748984	0.9317423385608272	1.5903716151564153	4.075725438231314	2.5221139537172426	101.0	49.0	2.5627503656310293	0.013576929543195759
2.5101281505582533	1.197396347485145	1.2389191301155589	3.749047280673812	2.436315477600704	150.0	91.0	3.0260629524092697	0.010721087253920902
0.6759185367886489	0.3548934325616382	2.0050763449046864	2.6809948816933353	2.3599697774663246	42.0	23.0	1.3371036412185988	0.010222226720883581
0.19208693367569518	0.1087933499581557	2.0939074354205696	2.2859943690962647	2.2027007853787253	11.0	-7.0	1.0917361151817648	0.012662418288295715
2.823580069338612	1.0405017333005415	1.392801427520106	4.216381496858718	2.4333031608206475	136.0	68.0	3.0272667830087014	0.011837154227482412
3.96329623257529	1.487798155405919	0.8247803055926631	4.788076538167953	2.312578460998582	204.0	119.0	5.805275060159664	0.01249933214359069
3.735662000525145	1.5225764335430634	0.8797399643397139	4.6154019648648585	2.4023163978827773	232.0	140.0	5.246325223304973	0.01035197941139316
0.8508131815873017	0.21825715695793857	2.187668816742157	3.0384819983294586	2.4059259737000955	39.0	11.0	1.3889131549876548	0.012472536691844158
1.2670106174105595	0.6912980040368732	1.4992786840671002	2.7662893014776597	2.1905766881039734	106.0	65.0	1.8450801247794266	0.008416033032179748
0.7548458348690912	0.25925048381312354	1.7147275528633137	2.469573387732405	1.9739780366764372	58.0	22.0	1.4402132768022666	0.009233025821180265
1.0494860467145029	0.23224290466548636	2.071198684282897	3.1206847309973997	2.3034415889483832	55.0	14.0	1.5067046704299458	0.010951790030003844
2.9221677543903795	0.662557580637634	1.544587439683049	4.4667551940734285	2.207145020320683	120.0	40.0	2.8918759011726856	0.012873997003079118
1.2116221917797387	0.42386360831354675	1.8913165560519267	3.1029387478316655	2.3151801643654735	72.0	29.0	1.640623690361474	0.010059779803181675
0.09294487106363425	-0.6931870848048067	2.9831699231680235	3.076114794231658	2.289982838363217	5.0	-17.0	1.0311564119568926	0.011065796474116544
0.19948315160234742	0.05769199239339251	1.8289644164619037	2.028447568064251	1.8866564088552962	11.0	3.0	1.1090689079606282	0.014934900489067305
0.23312933484672826	-0.0663661641729636	1.8898283783511551	2.1229577131978834	1.8234622141781915	15.0	-1.0	1.1233600561391346	0.011987172166475164
0.5889017467117386	0.22326243299124693	1.6065404703741133	2.195442217085852	1.8298029033653602	37.0	15.0	1.366565148884548	0.012515395548896675
1.6409910286341378	0.811651411219213	1.137296465892645	2.778287494526783	1.948947877111858	132.0	79.0	2.44288765317331	0.009836545927609647
1.9164174661530293	0.5669807734580139	1.6959744435768445	3.612391909729874	2.2629552170348584	98.0	37.0	2.1299801558986147	0.011245773088141179
0.9950112981238188	0.21256317097997934	1.4600439770811087	2.4550552752049275	1.672607148061088	66.0	17.0	1.6814940602768869	0.011534518195168682
1.8518081877133405	0.7610691823563154	1.3752168064308705	3.227024994144211	2.136285988787186	123.0	63.0	2.346557269409307	0.01008643992459578
1.2819969822442787	0.5832329525686446	1.2592294723123842	2.541226454556663	1.8424624248810288	108.0	58.0	2.018080509099017	0.009467137666559731
2.970072477275008	1.0834687854635778	1.006660293138158	3.9767327704131663	2.090129078601736	174.0	92.0	3.950421803184586	0.011456686151120325
1.441442104356961	0.7822476222731336	1.452826669415509	2.89426877377247	2.2350742916886426	89.0	55.0	1.9921638518219602	0.01129927626484464
1.5895101470584212	0.765583792635042	1.206835701999629	2.79634584905805	1.972419494634671	131.0	76.0	2.3170890987271355	0.009325488623346005
1.1702666665067534	0.36624213402931205	1.9836137221852967	3.15388038869205	2.349855856214609	53.0	19.0	1.5899670149576806	0.0128653237700742
0.5055434796405427	0.08963353656827167	2.130409210666172	2.6359526903067145	2.2200427472344435	32.0	6.0	1.2372987673492366	0.009909480846424235
1.8743594295084176	0.7234352662953418	1.5702567427817538	3.4446161722901714	2.2936920090770956	86.0	41.0	2.193664308798278	0.01333344435835828
1.7743524843695662	0.553605024593887	1.5559502235840483	3.3303027079536145	2.1095552481779354	76.0	30.0	2.140365840420293	0.014638098790227403
1.455125282437549	0.670058095918517	1.5042258187453246	2.9593511011828735	2.1742839146638415	91.0	49.0	1.9673582678239558	0.010847330055803867
1.2368721635050424	0.44694461386639395	2.0318621243585686	3.268734287863611	2.4788067382249626	56.0	23.0	1.6087382350785766	0.012471447233810658
3.2138199958446965	1.1693650618411404	1.3076910932767294	4.521511089121426	2.47705615511787	135.0	69.0	3.4576293379743914	0.013356591183768907
1.792029821102743	0.9377867968909732	1.4799337784098472	3.27196359951259	2.4177205753008204	119.0	73.0	2.2108851404339425	0.009700204037536199
2.657313818788463	0.7539486555512587	1.4510260522103156	4.108339870998779	2.2049747077615742	98.0	39.0	2.8313343270030447	0.015479197054480923
3.5233280981452344	1.1597711730833469	1.240421879164896	4.76374997731013	2.400193052248243	160.0	78.0	3.840427242800076	0.012209225269942676
3.020302528914158	0.8320344271444662	1.4158220767636651	4.436124605677823	2.2478565039081313	127.0	51.0	3.133250059087982	0.013076665977910983
2.944998173093402	1.2412648697174062	1.5039754900566784	4.44897366315008	2.7452403597740846	156.0	86.0	2.95814239830625	0.010094783885131903
1.202660666939978	0.6220473496784871	1.6052901151503989	2.807950782090377	2.227337464828886	71.0	41.0	1.7491858671460774	0.011524051386732879
0.668887067682064	0.09508874730502681	1.8120801189800175	2.4809671866620815	1.9071688662850443	44.0	7.0	1.3691266521143484	0.010540835125203516
0.6622227867921389	0.30026256671730067	2.0832953152198503	2.745518102011989	2.383557881937151	42.0	20.0	1.3178727384227111	0.009712464924776608
0.9693637504847008	0.2430067295261389	1.6108187385538877	2.5801824890385885	1.8538254680800266	58.0	17.0	1.601783259210746	0.011924192048029688
0.8657078506691116	0.4602398958022822	1.3350736988732557	2.2007815495423673	1.7953135946755379	55.0	32.0	1.6484345032036296	0.013353640110006764
2.5266325378356083	1.0581125362025126	1.7575315356123582	4.2841640734479665	2.8156440718148708	122.0	64.0	2.4376029599692393	0.010623662454508897
0.5858686496970886	0.09944974599225964	1.4722292435660265	2.058097893263115	1.571678989558286	42.0	8.0	1.3979466188825325	0.011788031022252147
0.37155001834795875	0.22662762294930072	2.0357179198897875	2.407267938237746	2.262345542839088	28.0	17.0	1.1825154726584488	0.008957742987919575
2.2920488859365693	1.1481392853578893	1.702410822629318	3.9944597085658873	2.8505501079872073	92.0	55.0	2.3463547432085603	0.013521111533942353
1.1194237656975643	0.5757214743675538	1.2563118852937158	2.37573565099128	1.8320333596612697	77.0	45.0	1.8910397002539316	0.012094469096935798
0.9204117182251168	-0.1294071015327234	1.9454715578439044	2.865883276069021	1.816064456311181	39.0	-3.0	1.4731046899730447	0.014706841127639448
1.6007329092886302	0.7704384799486446	1.7027649017402229	3.303497811028853	2.4732033816888674	88.0	49.0	1.9400786377806378	0.010989829089447244
1.8095501365564526	0.3950710795950223	1.3096753028207315	3.119225439377184	1.7047463824157538	80.0	24.0	2.3816784455346363	0.015847830957390275
3.269611982322446	1.0940984392142366	1.5043442298694172	4.773956212191863	2.5984426690836537	132.0	62.0	3.173446686870505	0.012717943556487336
1.9044956711090855	0.8716007112507798	1.0099847243066113	2.914480395415697	1.881585435557391	156.0	91.0	2.8856677980120797	0.009863904673418836
1.4592867599932273	0.5883008455669774	1.9130732631072591	3.3723600231004864	2.5013741086742365	75.0	35.0	1.7627971119219026	0.011052249163391224
1.8131531461880788	0.9298391729595097	1.7834679382731244	3.596621084461203	2.713307111232634	113.0	67.0	2.0166446546517105	0.009035329415119935
1.5173749932869027	0.4372342348107501	2.1498924822438528	3.6672674755307555	2.587126717054603	76.0	26.0	1.7057911062153264	0.010272546437795358
1.5010233111363471	0.9348493511152884	1.5259380918207868	3.026961402957134	2.460787442936075	87.0	60.0	1.9836724826400325	0.01149039356926372
1.7018580126659815	0.8859927216968344	1.3209318600659203	3.022789872731902	2.2069245817627547	101.0	62.0	2.2883768376826428	0.01194324646998238
0.7386393199513068	0.34072074486748694	1.5675469149808556	2.3061862349321625	1.9082676598483426	54.0	27.0	1.4712071536055606	0.010509441506559414
1.2988319123518588	0.3962438270450219	1.522330764408252	2.821162676760111	1.918574591453274	81.0	30.0	1.853186405161253	0.011125100050228194
2.3627119613030576	1.063285580049802	1.1958562817709337	3.5585682430739913	2.2591418618207357	169.0	98.0	2.975749090688504	0.009364600514079153
1.8209167135455784	0.6315131110364787	1.1535519496366817	2.97446866318226	1.7850650606731604	129.0	59.0	2.5785303072991965	0.010676164083257085
0.7335771451869331	0.45555152659695075	1.9724771252726283	2.7060542704595614	2.428028651869579	36.0	23.0	1.3719065411648517	0.013033777247859367
0.2647984803884653	-0.0787568789736599	2.2775668631493424	2.5423653435378077	2.1988099841756825	17.0	-6.0	1.1162637570263518	0.00991737221735276
1.137163515663221	0.25606431226314164	1.3097854950409415	2.4469490107041625	1.5658498073040832	78.0	22.0	1.868205916135661	0.011709785449011868
2.646593653108801	0.8912103565084286	1.4250545238685115	4.0716481769773125	2.31626488037694	135.0	62.0	2.8571876435466126	0.01130295363615989
2.483284409026183	0.9236372019901737	1.532266508708763	4.015550917734946	2.4559037106989368	146.0	71.0	2.6206608934622215	0.009585728861024453
0.9904109446004334	0.4548616769209113	1.9208272135510087	2.911238158151442	2.37568889047192	46.0	23.0	1.5156168850656138	0.013331224838054434
1.1001666731045194	0.17448624377786803	2.0255074865525975	3.125674159657117	2.1999937303304655	43.0	8.0	1.5431560635586674	0.01490199935594984
1.1114386717687323	0.41254596324238135	1.5815948335973422	2.6930335053660746	1.9941407968397236	63.0	27.0	1.7027328669509887	0.012384711543940477
1.470678435290754	0.7725405298080579	1.1507916856335894	2.6214701209243434	1.9233322154416472	110.0	68.0	2.27797102955349	0.010896783481347401
2.1084134654586024	0.8599783254522455	1.29536624882001	3.4037797142786124	2.1553445742722555	149.0	78.0	2.627658175731553	0.009417416296905214
3.6862256549563623	1.0563205758850942	1.2514043403554167	4.937629995311779	2.307724916240511	158.0	70.0	3.94567114407596	0.01261318928793011
3.4261913266792163	1.1926949903209627	1.1109238084359798	4.537115135115196	2.3036187987569425	165.0	85.0	4.084092086839689	0.012378142658671184
1.706118113867097	0.5972577883583199	2.3283005393479845	4.034418653215082	2.9255583277063044	66.0	27.0	1.7327740062049193	0.012201284707328909
2.7943452332265526	1.1001338989898104	1.6899944119475674	4.48433964517412	2.790128310937378	110.0	56.0	2.653464185130837	0.01291630345181633
1.229925266278391	0.47519753583816593	2.1079400598630498	3.337865326141441	2.5831375957012157	53.0	23.0	1.5834725994809822	0.012751767367070368
0.8658564476075179	0.4324521930576559	1.863320939186227	2.729177386793745	2.295773132243883	65.0	35.0	1.4646845475721781	0.008602968462571975
2.0644097414830496	0.5880885556001301	1.6306614690043346	3.695071210487384	2.2187500246044647	86.0	32.0	2.2659952913117873	0.013884057214977425
1.352934983409456	0.7503248722335756	1.4680122190455376	2.8209472024549935	2.218337091279113	107.0	67.0	1.9216101649951511	0.008889770639536826
2.1916073983271076	0.5214053927092914	1.5522124170611282	3.743819815388236	2.0736178097704197	77.0	25.0	2.411924923572364	0.01671296053822182
1.7069380018206273	0.8902215440298304	2.5346879079937876	4.241625909814415	3.424909452023618	66.0	38.0	1.6734312324753517	0.01142783486965751
0.8211640315539186	0.41531121693333084	2.1826733782898873	3.003837409843806	2.597984595223218	34.0	18.0	1.3762193829464746	0.013960923278625562
1.808091726771711	0.9128490976529662	1.488322188680948	3.296413915452659	2.401171286333914	134.0	80.0	2.214852362292713	0.008625643118557312
1.4987445693221495	0.6712933603567823	1.5361481710287637	3.034892740350913	2.207441531385546	78.0	41.0	1.9756510456399756	0.012757508438513627
1.5664304026696765	0.6914809736290588	1.652419253361466	3.2188496560311424	2.3439002269905247	104.0	54.0	1.9479618441162163	0.00933947008518185
1.76581378698668	1.1728873884057958	0.9646034240429375	2.7304172110296174	2.1374908124487333	120.0	91.0	2.830611153737806	0.01261439980825893
1.1288175947397405	0.569328208256934	1.3683340038241811	2.4971515985639217	1.937662212081115	84.0	48.0	1.8249576430790677	0.01045618047834747
1.6357487692529935	0.5025736901131428	1.4594035720534306	3.095152341306424	1.9619772621665734	95.0	37.0	2.120833743713152	0.011538633293911412
2.270946855604487	1.0912070595717747	1.2350002677311556	3.5059471233356425	2.3262073273029302	118.0	71.0	2.8388229662301936	0.012865751136588258
1.464232795886342	0.6750406786964664	1.5356296626985977	2.9998624585849396	2.210670341395064	69.0	37.0	1.953506455008958	0.014206853274330071
1.9895222165235114	0.6648851302774947	1.933833823492736	3.9233560400162473	2.5987189537702307	80.0	33.0	2.0287968864512855	0.012919296664812677
0.8918385973683989	0.4457809406427764	1.6451902819446793	2.537028879313078	2.0909712225874557	57.0	31.0	1.5420884180729604	0.011158669407522828
1.7375176857387729	0.7062052261525653	1.6739913093279215	3.4115089950666944	2.380196535480487	90.0	44.0	2.0379490479173135	0.011540651485421254
2.6309170515847358	1.3147496503605896	1.6870713394816554	4.317988391066391	3.001820989842245	138.0	84.0	2.5594580916732736	0.009896630539922777
0.9087689619918475	0.34594606214337476	1.9995921311200402	2.9083610931118877	2.345538193263415	55.0	23.0	1.4544771645419583	0.010009271224790277
1.6965562696096212	0.8053567769722194	1.448478464429258	3.1450347340388793	2.2538352414014775	122.0	69.0	2.1712678588411825	0.009244113349252018
1.76684962500599	0.37806880358091566	1.8782060327744292	3.645055657780419	2.256274836355345	95.0	26.0	1.9407112926775414	0.01017644163206053
2.2240812697079537	0.8599839026897818	1.0559092944867712	3.279990564194725	1.915893197176553	157.0	82.0	3.1063184890222764	0.01048208817941997
0.7816915929634072	0.14051613005415176	1.7401091660429642	2.5218007590063714	1.880625296097116	44.0	9.0	1.4492198582810676	0.012448290230522909
1.3349395796669346	0.5254135261714332	1.6673005768714038	3.0022401565383383	2.192714103042837	74.0	34.0	1.800659220170051	0.011623632506528037
0.10938643506623302	-0.7393808855724011	2.3975116321701218	2.5068980672363548	1.6581307465977206	6.0	-31.0	1.0456249861725264	0.012873104237050254
2.840631153560162	1.2383110346940345	1.5687014010876468	4.409332554647809	2.8070124357816812	120.0	67.0	2.81081699269895	0.012529323743401342
1.771143437713708	0.5511436782585728	1.8741866199828758	3.645330057696584	2.4253302982414486	81.0	31.0	1.94501978555897	0.011997310387332285
2.3449075079356185	0.8916969354438995	1.050958091265672	3.3958655992012905	1.9426550267095715	148.0	77.0	3.2312093388154417	0.011510708985206546
3.2487090482689585	1.1117923978287498	1.5604164425056037	4.809125490774562	2.6722088403343536	137.0	65.0	3.0819500229390155	0.011940025494301442
2.0344114807268587	0.8678584341211786	1.8201486079549478	3.8545600886818066	2.6880070420761264	103.0	53.0	2.1177172412381475	0.010612842870194544
0.6615793214678609	0.2209754250773477	2.464492858847505	3.126072180315366	2.6854682839248527	37.0	13.0	1.2684444059526476	0.009529452488661607
1.4461397214759288	0.8072973931377279	2.0846232032759033	3.530762924751832	2.891920596413631	67.0	41.0	1.693717559702577	0.011518080520391322
1.9035865865699053	0.9847670943413349	1.6955350174285244	3.5991216039984297	2.6803021117698593	144.0	87.0	2.122705557244648	0.007593736135321963
2.6146995658897243	1.2695893190069398	1.4938009022610217	4.108500468150746	2.7633902212679615	126.0	76.0	2.7503668406760946	0.011676992451434314
2.6819833586993767	0.7343257573290523	1.4649099202423723	4.146893278941749	2.1992356775714246	106.0	41.0	2.8308179374303353	0.014297323486219407
1.7158067142115898	0.7402125168290015	1.247197110664567	2.9630038248761568	1.9874096274935684	118.0	63.0	2.3757301869448084	0.010669837587432528
1.7258018342020567	0.6317640129293125	1.5158166069754018	3.2416184411774585	2.1475806199047143	97.0	44.0	2.1385294410025306	0.011423115300462108
0.850611125884023	0.3307763661181844	2.195180602113925	3.045791727997948	2.5259569682321095	57.0	24.0	1.3874902707617303	0.008437100984961825
2.766491354406053	0.9250811758374022	1.4039140187359995	4.170405373142053	2.3289951945734018	115.0	53.0	2.970556114894299	0.013778360016077617
1.2723358342893483	0.5138147325745615	2.1245229789069797	3.396858813196328	2.638337711481541	66.0	30.0	1.598880712009967	0.010416343191023875
2.06585617026521	0.7331001424902854	1.8705244347614973	3.936380605026707	2.6036245772517828	73.0	32.0	2.1044261875833867	0.014908707059241149
0.7638955853554887	0.2291577943966212	2.1351889312404073	2.899084516595896	2.3643467256370285	37.0	12.0	1.3577648676324463	0.012256490582587494
1.0799216955982123	0.30233641591206095	1.9247826760113018	3.004704371609514	2.2271190919233628	59.0	19.0	1.561061624804374	0.011078060182407461
1.2580460811166698	0.36128439958329817	1.8536302812561283	3.111676362372798	2.2149146808394264	65.0	22.0	1.6786930996099958	0.011677164053102186
1.7834130314587056	0.18948094959881945	1.7317836090342793	3.515196640492985	1.9212645586330988	76.0	11.0	2.0298128600796823	0.013617956311085895
1.7546739804675189	0.7856189464767926	1.5479511574517681	3.302625137919287	2.333570103928561	121.0	65.0	2.133546088983878	0.00911044396713251
0.1601217654599858	-0.23675801505577443	2.864138648642107	3.024260414102093	2.627380633586333	8.0	-5.0	1.055905731217272	0.011211577146003916
2.6645160440799454	0.8062811988210381	1.6982496079860199	4.362765652065965	2.504530806807058	103.0	42.0	2.5689778649440322	0.01334504372171298
1.4500349715146943	0.49592728375169126	1.8026251641936126	3.252660135708307	2.298552447945304	86.0	35.0	1.804401824803857	0.010017890002093783
1.339463777825732	0.5057102734510666	1.9424507194949496	3.2819144973206815	2.448160992946016	69.0	30.0	1.6895741366215982	0.011127347878439386
1.8885871944059436	0.9757225677208452	1.1850924156111464	3.07367961001709	2.1608149833319916	120.0	75.0	2.5936201848292213	0.011554346418276379
1.0486627346602369	0.12506077902484347	1.71317935449642	2.761842089156657	1.8382401335212635	62.0	9.0	1.6121149731975877	0.011294338327897628
2.4106960819475276	1.1950362226551645	1.3524350236735558	3.7631311056210834	2.5474712463287204	161.0	99.0	2.782485694136689	0.009227339188240568
2.539640056823316	1.1974916136702547	1.26946156332654	3.8091016201498564	2.4669531769967947	130.0	78.0	3.0005647513803866	0.012288636148576238
2.1738742330642915	0.9231028674120401	1.8757868529083743	4.049661085972666	2.7988897203204144	101.0	52.0	2.1589132473626935	0.011103052720245194
0.9583904176518958	0.11076784522789196	1.7035974649256773	2.661987882577573	1.8143653101535693	47.0	-1.0	1.562568586408238	0.013998250346050909
3.699079446408356	1.3707271871296323	1.1415653726786354	4.840644819086991	2.5122925598082677	164.0	89.0	4.240357087679193	0.012786415715989626
2.0853106733585975	0.9155637089292012	1.3564417587091446	3.441752432067742	2.272005467638346	140.0	77.0	2.537338894183765	0.009664145487159981
1.2204775839411652	0.3531346725122191	1.1965215550593051	2.4169991390004704	1.5496562275715242	88.0	32.0	2.0200213934973137	0.011659431864929544
0.17391903602571057	0.23644924550093593	2.0370770026376217	2.2109960386633323	2.2735262481385576	12.0	-4.0	1.0853767608198015	0.010745084031183677
0.10371930146086195	0.033388994304971664	2.0630629571015384	2.1667822585624004	2.09645195140651	6.0	-9.0	1.0502744238142787	0.014153267130329241
2.1394066761338717	0.6152613358438195	1.5868715025236366	3.726278178657508	2.202132838367456	100.0	38.0	2.3481915030495704	0.012439899696580997
2.511579469849072	0.840917927188733	2.03952646845205	4.551105938301122	2.880444395640783	94.0	40.0	2.231452255559742	0.012451429449793754
1.511480954485777	0.6928426002150887	1.594121011966452	3.105601966452229	2.2869636121815407	86.0	46.0	1.9481594829625055	0.011318962190335442
2.4085195700825137	1.159151632116339	1.2539690457898984	3.6624886158724124	2.4131206779062375	150.0	91.0	2.920716925325172	0.010378003621051558
4.022826873511601	1.6020661098938471	1.3411287612191	5.363955634730701	2.943194871112947	195.0	110.0	3.999582881105919	0.010308502826367909
1.7833801240806166	0.8042893014983137	1.581745288696446	3.3651254127770627	2.3860345901947597	102.0	55.0	2.1274761725703275	0.010783593802208466
0.027202451563076213	-0.6976342049582862	2.6824076523253106	2.709610103888387	1.9847734473670244	2.0	-22.0	1.010141057992992	0.014556767687455075
1.441880450640329	0.35067071055220067	1.5055376200272195	2.9474180706675486	1.8562083305794201	78.0	24.0	1.9577179815767476	0.012586661726588967
2.5926210152174916	0.8063255654261949	1.7111762254722276	4.303797240689719	2.5175017908984225	87.0	36.0	2.5151104699938283	0.015472346142168426
2.288999396885384	0.9148055350237989	1.2943467977697916	3.5833461946551757	2.2091523327935905	121.0	63.0	2.7684591183981113	0.012242360148915202
1.4500541349045097	0.8997524654286873	1.8738567823644197	3.3239109172689294	2.773609247793107	77.0	52.0	1.7738340243243358	0.010879881902428813
0.8607220282321446	0.6410965754733746	0.9994645366455872	1.8601865648777318	1.6405611121189618	90.0	71.0	1.861183160255899	0.0100698880780791
2.975250780469069	1.1897306574521427	1.3450284560187102	4.320279236487779	2.534759113470853	152.0	82.0	3.212035564865165	0.011148926271559246
2.7192731929013796	1.189509992595261	1.2823976128835965	4.001670805784976	2.4719076054788576	164.0	94.0	3.120460273461386	0.010072140152622583
1.9968279375513678	0.473239242476412	1.2467691565674266	3.2435970941187944	1.7200083990438386	105.0	35.0	2.6016019702067252	0.013263463991215889
1.307443314973835	0.4778455809509634	1.449566036706526	2.757009351680361	1.9274116176574894	89.0	39.0	1.901954986434699	0.010539580708426446
1.6317974908312327	0.6147479139132566	1.6053571764252812	3.237154667256514	2.2201050903385378	107.0	49.0	2.016470050898472	0.009545584704215083
0.34808527052251437	-0.059886382801511484	2.714608361706336	3.0626936322288505	2.6547219789048246	26.0	-2.0	1.128226699450567	0.006962279351748378
2.4351003012767167	1.0292244840511897	1.6512812874619345	4.086381588738651	2.680505771513124	102.0	54.0	2.47467322482624	0.01294295082229593
2.137112212203823	0.9190365064455696	0.9950915665561725	3.1322037787599957	1.914128073001742	157.0	89.0	3.147653828079332	0.010604339007686167
1.3018266292251852	0.4254609751721872	1.4285365749507426	2.730363204175928	1.8539975501229298	83.0	33.0	1.9113008739521238	0.01139701101168016
1.4345584819418777	0.4201211740857995	1.4392208935835302	2.873779375525408	1.8593420676693297	82.0	30.0	1.996760461397942	0.012316805830253836
2.9615773943891974	1.395422170409295	1.1909894999586217	4.152566894347819	2.5864116703679167	154.0	95.0	3.4866528164119757	0.011776749770276778
1.232170723241442	0.17043370332818308	1.5922951256464855	2.8244658488879275	1.7627288289746685	63.0	11.0	1.7738331314310658	0.013336617715746499
2.873175262704113	1.0925135230607865	1.260723231702301	4.133898494406414	2.3532367547630875	138.0	72.0	3.2789897024619643	0.012505484459935198
0.9782538137286971	0.4911980944022829	1.890323651793789	2.868577465522486	2.381521746196072	66.0	36.0	1.5175059904690928	0.009256957102145101
2.779960884646769	1.2767269586994932	2.141104332960558	4.921065217607327	3.4178312916600513	122.0	68.0	2.2983771233617785	0.00992244246571649
4.285745385528346	1.3240277330975656	1.4626548421799048	5.748400227708251	2.7866825752774704	156.0	73.0	3.93011396943176	0.012739168708547402
3.0351007870834823	1.0060577762255072	1.4878198121389388	4.522920599222421	2.493877588364446	128.0	59.0	3.039965298432289	0.012630353190758257
1.9872107713951366	0.6858256712267481	1.322120648890109	3.3093314202852455	2.007946320116857	102.0	46.0	2.50304798057829	0.0131058014466507
2.4301532407645916	0.894160147793182	1.560068202633449	3.9902214433980405	2.454228350426631	115.0	55.0	2.557722435892488	0.011884734310608065
0.9841357495235807	0.4963122586850055	2.018556422748482	3.0026921722720625	2.5148686814334873	57.0	31.0	1.4875443353639697	0.010230940494983775
1.6067250085652338	0.9487722218823156	1.2578301532914673	2.864555161856701	2.206602375173783	124.0	84.0	2.2773783522050133	0.009653447101601919
2.895933870795643	0.7734646783760453	1.5639767921176935	4.4599106629133365	2.3374414704937387	134.0	51.0	2.851647598219422	0.011366885014941647
1.6036490047009637	0.2746483320579367	0.9821664366684895	2.585815441369453	1.2568147687264262	107.0	27.0	2.6327670594614743	0.013175281896601781
1.5390687227274624	1.0347273548886002	1.8024680098888355	3.341536732616298	2.8371953647774357	84.0	61.0	1.8538674274848197	0.010729374441191738
0.5050260800501549	0.016271238475114025	2.1629862607784243	2.668012340828579	2.1792574992535383	29.0	1.0	1.233485570023179	0.010812172796970106
2.6724949395048307	1.0770664537192987	1.3207340331696706	3.993228972674501	2.3978004868889693	142.0	76.0	3.0234921432977893	0.0113206796459287
0.8725288012537074	0.5188453767635743	1.841646516414095	2.7141753176678023	2.3604918931776693	51.0	32.0	1.4737764785354275	0.01119035467100255
1.9832795379542227	0.5514555318912067	1.5183408095037547	3.5016203474579775	2.0697963413949614	90.0	33.0	2.306214998332572	0.013545247364100234
2.079308109102882	0.6869440017587194	2.081497829871409	4.160805938974291	2.7684418316301285	69.0	28.0	1.9989480071816061	0.01469471982267782
0.7485127084702743	0.506874206074269	1.7536805093462142	2.5021932178164885	2.2605547154204833	64.0	45.0	1.4268238738362473	0.00813979778594245
1.8538768582879006	1.0160503380677157	1.323483656325611	3.1773605146135115	2.3395339943933267	104.0	67.0	2.4007553847962284	0.012266877801109842
1.157213572721914	0.4693058861252877	1.768869247163424	2.926082819885338	2.2381751332887116	78.0	36.0	1.654210917272508	0.00943043109801914
1.8950315246596607	0.9729386794514017	1.411297308012273	3.306328832671934	2.3842359874636747	139.0	85.0	2.3427585483945252	0.008900059952585556
2.594197334146906	0.5699909816582938	1.4382853200753616	4.032482654222267	2.0082763017336553	106.0	34.0	2.803673650796198	0.01416493741523823
2.4101663279109617	0.6403212801893168	1.4979127965578196	3.9080791244687814	2.1382340767471364	98.0	36.0	2.60901644838704	0.014262948861525983
1.7654817395321747	0.7913009196970797	1.6933073449245677	3.4587890844567424	2.4846082646216474	96.0	51.0	2.0426233281417807	0.010846559863942805
1.8137293383979263	0.888983911713136	1.7829400241194346	3.596669362517361	2.6719239358325706	86.0	49.0	2.0172688446397395	0.011910627847478122
2.9632713751056308	1.3539939800121092	1.270097999972366	4.233369375077997	2.6240919799844753	147.0	88.0	3.3331045125416336	0.011896346268358933
1.5256094859771616	0.313104251519422	1.6075387160917523	3.133148202068914	1.9206429676111743	76.0	20.0	1.949034365832397	0.012836793716778393
1.0949083279093266	0.36819684231776795	1.5998970101680974	2.694805338077424	1.9680938524858653	74.0	29.0	1.6843617563822355	0.010304137321135968
0.46969182747829286	0.41718943696580557	1.2052387134177307	1.6749305408960236	1.6224281503835363	32.0	28.0	1.3897085467379104	0.015315559643400757
0.5812331889224771	0.2671075602672448	1.5174261980134645	2.0986593869359416	1.7845337582807093	43.0	21.0	1.3830388520268053	0.011139087736503898
1.737820972349454	1.032541541451069	1.4960160948092414	3.2338370671586953	2.5285576362603104	95.0	64.0	2.1616325374968945	0.011831077614771278
1.516675202970698	0.5453077486121918	1.6406193267957627	3.1572945297664607	2.1859270754079545	74.0	32.0	1.9244528442395374	0.012937648226797925
1.3313531636122526	-0.1757829421243049	1.8988030300387058	3.2301561936509584	1.7230200879144009	51.0	-7.0	1.7011539072513033	0.015330273415953334
2.0481429677898637	0.9232172748706517	1.388265003661215	3.4364079714510787	2.3114822785318667	97.0	54.0	2.4753256492012543	0.013621024332631806
1.1921706573732715	0.637824907626739	1.2183129005275577	2.4104835579008292	1.8561378081542967	95.0	58.0	1.9785422586078125	0.010472743397641017
2.284788706047552	0.7480190731577205	1.2337643483372718	3.5185530543848236	1.9817834214949923	158.0	71.0	2.8518842023006514	0.009630034419657384
2.735468547637165	1.2050424879665687	1.030736677535343	3.766205225172508	2.2357791655019117	165.0	98.0	3.6538965841189524	0.011398998793202846
1.4083860078067134	0.510328178529565	1.914477707671072	3.3228637154777854	2.424805886200637	71.0	30.0	1.7356502518485786	0.01136394659802082
1.3865115220564124	0.7957745570664279	1.4324030224103002	2.8189145444667125	2.228177579476728	96.0	62.0	1.967961879697331	0.010281076582094343
2.1960757002900584	0.8003011826471151	1.5091801771559414	3.7052558774459996	2.3094813598030566	77.0	36.0	2.4551448087719887	0.01705010683879105
2.6755261498075207	1.206048810881416	1.394384548059094	4.069910697866614	2.60043335894051	166.0	96.0	2.918786430566593	0.00936587061697722
1.9209553195707336	0.7144852111381987	1.3900599412189814	3.311015260789715	2.10454515235718	114.0	54.0	2.381922651397461	0.011080766062541766
0.013917254307743487	0.15623975386161604	2.1359742974385236	2.149891551746267	2.2922140513001397	2.0	-9.0	1.0065156468991379	0.009369600007220357
1.108091457603023	0.027988646778776438	2.5221985784188212	3.630290036021844	2.5501872251975977	34.0	1.0	1.439335533325727	0.01592130144752348
2.0632013585662827	1.1141484588130248	1.3737770469692838	3.4369784055355663	2.4879255057823086	106.0	68.0	2.501845851274012	0.01259993240030761
0.6367947124155586	0.16230685340786577	1.7555359588319939	2.3923306712475525	1.9178428122398596	43.0	12.0	1.362735214400983	0.010631077790941561
2.3246468031774308	0.9230039964246799	1.349452689765864	3.674099492943295	2.272456686190544	124.0	64.0	2.7226589867191024	0.011748099967597122
1.8383036670048891	0.8896039630294148	1.2027371887705705	3.0410408557754596	2.0923411517999853	130.0	77.0	2.5284333802665486	0.010373982686134549
2.042795577688275	0.40671431371802735	1.3829914979413502	3.425787075629625	1.7897058116593776	96.0	27.0	2.477084696998553	0.013775191561668424
2.2356325451485946	1.0851578406030506	1.4585082646121028	3.694140809760697	2.5436661052151535	133.0	79.0	2.532821307490617	0.010157161343830582
1.7358656246375277	0.6069921840530375	1.1033434918641027	2.8392091165016304	1.7103356759171402	139.0	64.0	2.5732776215544413	0.009881210960754968
2.7222282676436187	0.8667330911144817	1.0981699356085315	3.82039820325215	1.9649030267230132	151.0	70.0	3.478877065720383	0.01199081132563969
0.6113051806492784	0.4288186165710499	2.100735825136428	2.7120410057857063	2.529554441707478	34.0	24.0	1.2909957422226463	0.011166189168566352
1.7750970442775091	0.7722951413389179	1.7834959059094901	3.5585929501869993	2.555791047248408	97.0	50.0	1.9952907872655317	0.010381239744872156
1.6864101838146748	0.6008171672441953	1.6354010022298542	3.321811186044529	2.2362181694740495	78.0	34.0	2.0311906263450186	0.013276956393267666
0.7101678027904414	-0.6543463696642389	2.5545372516921616	3.264705054482603	1.9001908820279227	26.0	-18.0	1.278002523674304	0.014155627407227428
0.8333024957851329	0.285886379821523	1.4425555170807949	2.275858012865928	1.7284418969023179	59.0	23.0	1.5776571410377553	0.011341098459155157
1.5690424407306593	0.9336848569747083	1.346852013190136	2.9158944539207954	2.2805368701648443	133.0	90.0	2.1649701863044672	0.008442023922787516
1.7518113335901435	0.7787584685175775	1.2772741200883422	3.0290854536784857	2.0560325886059196	157.0	86.0	2.371523391916044	0.007985987812503169
1.1388354943587347	0.23722019361978197	1.4146205669122076	2.5534560612709423	1.6518407605319896	81.0	21.0	1.8050466117883126	0.010650451154539843
1.5929388988502824	0.7871371889834688	1.9383480572852023	3.5312869561354847	2.725485246268671	89.0	50.0	1.8218023037004558	0.009833709214445235
1.4268916764919606	0.5451858922046688	1.7583602095966366	3.185251886088597	2.3035461018013055	67.0	30.0	1.8114899715680475	0.012987527561134462
0.7199540192349132	0.24979049397767827	2.2427045222200084	2.9626585414549216	2.4924950161976867	30.0	11.0	1.3210204519150142	0.013850096635422766
1.9355102663342116	0.8249728066471651	1.3908701189411226	3.326380385275334	2.2158429255882877	89.0	47.0	2.3915823195682187	0.014295061937832601
0.9181192327658292	0.37590389790719225	1.5533473746329394	2.4714666073987686	1.9292512725401316	61.0	28.0	1.5910585409028573	0.011166448645147807
1.809175910075702	0.6509374984540246	1.7448849829734754	3.5540608930491775	2.3958224814275	93.0	41.0	2.0368453667316615	0.011155831064232447
1.1163188303668543	0.7092410314884148	1.6816565626046638	2.797975392971518	2.3908975940930786	69.0	47.0	1.6638209341851726	0.010801473151556768
1.1052218942286676	0.3287459042488632	1.8499726871592495	2.955194581387917	2.1787185914081126	64.0	22.0	1.5974260603413588	0.010726177064362652
0.6422297713879699	0.2982670318329297	1.9468616794259463	2.5890914508139162	2.245128711258876	37.0	18.0	1.3298795071960832	0.011424876035311038
1.8147708503623454	0.7409845073084089	1.5059595699664874	3.320730420328833	2.2469440772748963	84.0	42.0	2.2050594760672957	0.013744789993558989
1.1853000486195877	0.12418461614613507	1.9829028115765786	3.1682028601961663	2.1070874277227136	55.0	7.0	1.5977600322615773	0.012519458259700345
1.3246145532529106	0.5136602481024233	1.8725566765845998	3.1971712298375103	2.386216924687023	65.0	29.0	1.707382889830019	0.01205916604373468
2.2144738052389066	0.8707338849294031	1.4374239555769521	3.6518977608158587	2.308157840506355	127.0	64.0	2.5405850143565076	0.010675878897964146
0.24921691831196613	-0.17737688587624856	2.436410225812369	2.6856271441243353	2.2590333399361207	13.0	-5.0	1.1022885701560665	0.011708496595714064
0.32085157443986967	-0.32607167340610355	2.5980327802985084	2.918884354738378	2.271961106892405	15.0	-21.0	1.1234978930492958	0.01199981564025607
0.7642744929713179	0.2093393303031026	2.144555451751032	2.90882994472235	2.3538947820541347	37.0	11.0	1.3563789839741784	0.012215564895108257
1.0237861319306378	0.6746764590664553	1.892732643693432	2.91651877562407	2.5674091027598873	79.0	55.0	1.5409037221088167	0.007997137474330769
0.7568202374371489	0.2761679806658912	1.9007593557904885	2.6575795932276374	2.1769273364563797	43.0	17.0	1.3981673088345274	0.011512785909474361
2.1095048924678403	0.887286383264732	1.42557037817524	3.5350752706430804	2.312856761439972	138.0	73.0	2.4797620129902325	0.009563515834601676
1.6616960694731564	0.7334363825535897	1.5631166835567398	3.2248127530298962	2.2965530661103295	97.0	51.0	2.063065916289824	0.010883228302084045
1.2662124307547702	0.8068069249064294	1.652809644191836	2.9190220749466063	2.4596165690982654	94.0	65.0	1.7660969520624392	0.008823274663198148
2.128657050990597	1.1075354434036604	2.0431913104525874	4.1718483614431845	3.150726753856248	90.0	54.0	2.0418295340728903	0.01157148792326938
1.374197853922651	0.24613226132252697	1.3428729985045167	2.7170708524271676	1.5890052598270437	68.0	16.0	2.0233267445640943	0.01517506444432239
0.8086487775906164	0.25454553947905034	1.7040746283091914	2.512723405899808	1.9586201677882418	54.0	19.0	1.4745383589173966	0.010571006668437114
1.4904312826197172	0.7787642365504459	1.282200526375248	2.7726318089949653	2.060964762925694	118.0	72.0	2.162401084667414	0.009509693509794375
1.8662821111753658	0.4746263820858485	1.8064417507259565	3.6727238619013223	2.281068132811805	74.0	24.0	2.033126094669458	0.014023283479972724
1.855365000469943	0.5478946742712365	1.105274642066999	2.960639642536942	1.6531693163382355	94.0	38.0	2.6786461299792266	0.015284989274352713
1.0471407436754645	0.3131835085484447	1.8883374169573108	2.9354781606327753	2.2015209255057555	47.0	16.0	1.5545305273687413	0.013836498872537262
1.5115481311491348	0.47126065379990956	1.6494802811766733	3.161028412325808	2.120740934976583	89.0	34.0	1.9163784183408707	0.010663437176028558
0.6703277909747407	0.2930360885166525	1.5360513674130636	2.2063791583878043	1.829087455929716	57.0	27.0	1.4363967281274397	0.009329540569640896
1.9375125077264772	0.4736477410543065	2.34104797549347	4.278560483219947	2.8146957165477766	73.0	22.0	1.8276261435086858	0.012082930347497028
3.0209551613683345	1.0722060270525364	1.5347643092561147	4.5557194706244495	2.606970336308651	116.0	56.0	2.968351194479211	0.01364923297050627
2.553101517393814	0.9025817989644012	1.4939724820377285	4.047073999431542	2.3965542810021296	98.0	46.0	2.70893476827061	0.014821913954150754
1.502656612911431	0.6493082097755316	1.5147417417417035	3.0173983546531344	2.164049951517235	86.0	44.0	1.9920216572256226	0.011696862734673378
1.7154567252718576	0.49556080865442564	1.1824057085417132	2.897862433813571	1.6779665171961389	106.0	41.0	2.450819048723613	0.012316799711059328
3.6731649300003157	0.893476166958413	1.611319433209463	5.284484363209779	2.504795600167876	106.0	39.0	3.2796007137355887	0.01631923980635178
0.8132871906813692	0.21743628868231735	2.170784648441234	2.984071839122603	2.388220937123551	41.0	12.0	1.3746512539902855	0.011476641412198492
1.3693911236107483	0.5784039895588042	1.8440191555327277	3.213410279143476	2.422423145091532	58.0	28.0	1.7426122009102114	0.014057044725301017
3.154472773911122	1.5629005420722535	0.8823071732474348	4.036779947158557	2.4452077153196883	274.0	183.0	4.575254593364255	0.008036088005287647
1.6078730758196638	0.5951522520081032	1.4527360217633365	3.0606090975830003	2.0478882737714397	103.0	47.0	2.106789569290105	0.010539668841594694
5.020592092104967	1.778876166171435	1.3207265220059565	6.341318614110923	3.0996026881773915	161.0	87.0	4.801386591737062	0.014146569385605946
0.4769245980313457	0.37193512937051976	1.7108698219001184	2.187794419931464	2.082804951270638	31.0	24.0	1.278761476721628	0.011824906267774164
1.6815355552428553	0.6675485462176607	1.8607041692702364	3.5422397245130917	2.528252715487897	64.0	30.0	1.9037092424543496	0.014743065866684262
1.4340129811494824	0.41874663295965076	1.9133377627561658	3.3473507439056482	2.3320843957158166	66.0	23.0	1.7494824014155161	0.012414279263618462
2.327902043612276	0.6790506634210027	1.4123497351483634	3.7402517787606393	2.091400398569366	130.0	52.0	2.648247587462985	0.010891767500256597
0.8969118871428972	0.2295299381781657	2.0081395579409467	2.905051445083844	2.2376694961191124	59.0	17.0	1.4466382247170855	0.009184554789718517
0.8939171231819683	0.4816178888807481	1.4831929074842418	2.37711003066621	1.96481079636499	53.0	31.0	1.6026978140680366	0.013086585258668371
1.6426316521752995	0.45668076432487603	1.353899484402626	2.9965311365779255	1.810580248727502	83.0	30.0	2.213259677767046	0.013977716218016927
1.4159744330007829	0.35246626384304336	1.2895606210868997	2.7055350540876826	1.642026884929943	93.0	30.0	2.098028591945787	0.011619938468538179
1.291885493764382	0.5492394268383101	1.8065068573652945	3.0983923511296765	2.3557462842036045	64.0	31.0	1.7151290284325498	0.01235423990189612
1.360481368096905	0.33342178464565797	1.5313049645566421	2.891786332653547	1.8647267492023	72.0	22.0	1.888445737189133	0.012918300419902846
2.867884557376666	1.2457846753811648	1.3609308005147316	4.228815357891397	2.6067154758958964	158.0	90.0	3.1072963858941054	0.010418215654976044
1.7388469285525046	0.5470414960466727	1.0049869046546795	2.743833833207184	1.5520284007013523	105.0	45.0	2.7302184938917033	0.013932850112942723
1.2750059511998473	0.35097642217344993	1.9872619860353489	3.262267937235196	2.338238408208799	65.0	21.0	1.6415892620899597	0.011173331237168868
0.8820904418415985	0.272578897024762	1.7418618130065326	2.623952254848131	2.0144407100312947	63.0	22.0	1.506406670870791	0.00953405312602224
1.4694615150695556	0.7192075351356138	1.5131769702368787	2.9826384853064343	2.2323845053724924	90.0	51.0	1.9711101503477946	0.01100009438069966
1.3549085915476238	0.48931545348678784	1.5083954966377133	2.863304088185337	1.9977109501245012	74.0	32.0	1.8982449195637223	0.012666659547479487
0.8160963030264894	0.39874432472057264	1.8136555087901158	2.6297518118166052	2.2123998335106885	44.0	23.0	1.4499731614251843	0.01246572550298595
1.8917622049669613	0.8335117346389966	1.4906220372696544	3.3823842422366157	2.324133771908651	108.0	58.0	2.2691092427642277	0.01104790716831338
1.4795979619258999	0.45977990186018447	1.6627440864662248	3.1423420483921247	2.1225239883264093	74.0	28.0	1.8898530892209882	0.012579097103815474
1.043544265521718	0.5799794048296893	1.9325837910278472	2.976128056549565	2.5125631958575365	52.0	31.0	1.5399736199622722	0.012213836029303487
1.3606379746456865	0.7465452508809517	0.979918107202249	2.3405560818479354	1.7264633580832007	104.0	67.0	2.388522127150426	0.012195322737148755
1.8559450062986829	0.47230326077331775	1.321296081736701	3.177241088035384	1.7935993425100187	90.0	31.0	2.404639756336251	0.014222705362812706
1.81057838760935	1.0626404959965128	1.3344778596563023	3.1450562472656522	2.397118355652815	162.0	110.0	2.356769147204637	0.007682052478800949
1.980806487323052	1.029718722774613	1.2529198923522262	3.233726379675278	2.282638615126839	148.0	93.0	2.5809522216175327	0.009305465541653745
1.59865831601294	0.4831549813584983	1.2668755263941882	2.865533842407128	1.7500305077526865	97.0	38.0	2.2618905983313766	0.012265928663229661
1.2747641908967964	0.34585984799352487	1.3670367477831755	2.641800938679972	1.7128965957767004	112.0	38.0	1.9325017728777145	0.008562790429546075
1.5985088593961772	0.5583226178918723	1.8821190134665233	3.4806278728627005	2.4404416313583956	72.0	30.0	1.849313379206564	0.012492812962214538
1.4352121842914995	0.820767249948706	1.6218733348278713	3.057085519119371	2.4426405847765773	114.0	73.0	1.8849101551101202	0.008092882819275988
1.6154110747996455	0.3346451605440399	2.0199332957151697	3.635344370514815	2.3545784562592096	70.0	18.0	1.7997348616542803	0.012286730192010166
2.144270251495149	1.1967036197369074	1.7781231560195652	3.922393407514714	2.9748267757564726	104.0	67.0	2.205917736483015	0.01108134942394138
2.7761548742301327	1.0162066451628942	1.328734979188254	4.104889853418387	2.344941624351148	140.0	70.0	3.089321736623605	0.011707123222278046
1.4113420733098225	0.4645747416887134	1.691121681432831	3.1024637547426535	2.1556964231215443	66.0	26.0	1.8345597415048451	0.013468213630486232
2.169593391906708	1.1603948124700718	1.7194406434570917	3.8890340353637995	2.8798354559271635	164.0	103.0	2.261801854087003	0.007223757957538069
0.26928533351013373	-0.4271809998095297	2.3242028655479494	2.593488199058083	1.8970218657384197	13.0	-20.0	1.115861372301788	0.013179817234396193
2.0411679061073023	1.0961882436911567	1.780809081604506	3.821976987711808	2.8769973252956627	122.0	76.0	2.1462025475904545	0.00910567137751445
1.0806047156820053	0.6833199427632493	1.4501306900888231	2.5307354057708285	2.1334506328520724	76.0	52.0	1.7451774678431338	0.010711650028941509
0.5707040280133804	0.172439773618964	1.7266389444036785	2.297342972417059	1.8990787180226425	34.0	11.0	1.3305288751091398	0.012484843031416254
1.7444226511209435	0.38824741120573414	2.035115551327254	3.7795382024481974	2.423362962532988	79.0	22.0	1.8571614766460178	0.011449990516762048
2.460329529536053	0.939137056849108	1.5152825444938822	3.975612074029935	2.45441960134299	111.0	55.0	2.6236770749298275	0.012650819658043764
2.1527357575961314	0.7341532643042223	1.731367110750204	3.8841028683463357	2.4655203750544263	97.0	42.0	2.2433733690732685	0.012142393239590182
1.30555687266496	0.7647756908600676	1.4938152979851607	2.7993721706501207	2.2585909888452282	80.0	52.0	1.8739747640996036	0.011469639557725907
0.46227007036470313	-0.22042418757999327	1.9499330844610343	2.4122031548257374	1.729508896881041	23.0	-20.0	1.2370697097497967	0.013951218158501467
1.6383505234626363	0.563467022716605	1.1097199168567031	2.7480704403193394	1.673186939573308	107.0	48.0	2.476363989305776	0.012341730049237823
1.5742832610207378	0.6877449770320063	1.6368819287496006	3.2111651897703384	2.324626905781607	74.0	38.0	1.9617573713598992	0.013317077002456726
2.5481085041651594	0.9415130642806477	1.449917693451323	3.9980261976164826	2.3914307577319707	151.0	74.0	2.7574159662123647	0.009755446130343738
1.1784833231285643	0.5079486991715234	1.1590159716237376	2.337499294752302	1.666964670795261	84.0	43.0	2.0167964480054175	0.01219356002925001
2.0393188252688343	0.5541122260790969	1.490006094070495	3.529324919339329	2.044118320149592	91.0	33.0	2.3686647547176745	0.013823044704751864
2.319033542557804	0.9810968399848032	1.3902846931600477	3.709318235717852	2.371381533144851	137.0	74.0	2.6680278175880345	0.010410100798045179
0.5661807680795401	0.0774938218337069	2.1441601469456866	2.7103409150252267	2.2216539687793935	34.0	5.0	1.2640571269296528	0.010244292883551881
2.034859642474936	1.0755050941765565	1.2927671496947357	3.3276267921696716	2.368272243871292	140.0	89.0	2.57403415066312	0.009813174060822329
2.198110519526362	0.7752372645414758	1.9544852144851845	4.1525957340115465	2.7297224790266603	98.0	43.0	2.1246493466594725	0.011208502656533526
1.7566744385593747	0.540556609270648	1.526678445496399	3.2833528840557737	2.067235054767047	97.0	38.0	2.150651234869693	0.01150805818631325
1.981390956311297	0.8572162667756897	1.4656846896380697	3.4470756459493668	2.3229009564137595	131.0	70.0	2.3518534854864135	0.009490755282521484
1.3079783673683607	0.2508877545256023	1.7516955897131832	3.059673957081544	2.0025833442387855	76.0	18.0	1.7466927330578739	0.010728344545995064
1.8635004326179887	0.5698121918219803	1.5724455099463563	3.435945942564345	2.1422577017683366	92.0	36.0	2.1850969848116146	0.012392278183431547
3.0161418125395287	0.8505884216093373	1.5488596953536677	4.5650015078931965	2.399448116963005	122.0	49.0	2.9473305565297316	0.012887676647504186
0.2697558187846174	0.15191078638394373	1.9546048663642757	2.224360685148893	2.1065156527482194	20.0	11.0	1.138010409892402	0.009816513404444036
1.1544180336877887	0.34403110498273204	2.10819449340555	3.2626125270933386	2.452225598388282	53.0	18.0	1.547586115654328	0.012115763281700428
1.571513599376689	0.5244389089438033	1.6272822619126934	3.1987958612893825	2.1517211708564967	76.0	31.0	1.9657289556696487	0.013000858793835416
1.5084117790629405	0.5172723498508367	1.4675072644101221	2.9759190434730627	1.9847796142609588	97.0	41.0	2.027873466554362	0.010624662866116089
1.8319936254849714	0.6194922677338484	1.6784472919825333	3.5104409174675046	2.2979395597163816	102.0	43.0	2.091481176820914	0.010539851622668371
2.3831268046672545	0.6270268894615734	1.8070822313296098	4.1902090359968645	2.434109120791183	97.0	34.0	2.3187705370296317	0.012639167286877726
1.943489998293407	0.665519768033052	1.5090604144082764	3.4525504127016835	2.1745801824413284	112.0	49.0	2.2878808427663095	0.010756864105774663
1.9659395200181202	0.9267496968980087	1.410704799503915	3.3766443195220353	2.3374544964019237	141.0	81.0	2.3935867523166134	0.008994100682407592
1.8554375201991835	0.6476104037859223	1.8138489514064204	3.669286471605604	2.4614593551923427	91.0	39.0	2.022928352860097	0.011293835823288523
2.9975380284426967	0.7373349795389041	1.430107767636455	4.427645796079152	2.1674427471753592	107.0	39.0	3.0960224790588615	0.015381282513097639
1.9997922895352798	0.722366311375606	1.5667062051235747	3.5664984946588545	2.2890725164991808	129.0	59.0	2.2764309498458553	0.009271669525589868
0.1552492557059204	0.13920742626170535	2.0420089078780386	2.197258163583959	2.181216334139744	11.0	9.0	1.0760277073753064	0.010571522731674545
0.11946658152913914	-0.21407717521131397	2.621881173184308	2.741347754713447	2.407803997972994	6.0	-18.0	1.0455652158270947	0.012856610207786433
0.2631261339060793	0.11046957587664541	1.6981484423512374	1.9612745762573167	1.8086180182278828	17.0	7.0	1.154948841540471	0.01298930930493949
0.6909445148844355	0.1823240187597337	2.8428972331353735	3.533841748019809	3.025221251895107	29.0	8.0	1.2430423818459335	0.01120983879582339
1.4609473882264092	0.45268004907746917	1.8358325331011365	3.2967799213275457	2.2885125821786056	86.0	32.0	1.795795565164399	0.009936742609925248
1.4629877322175053	0.5296521520275856	1.2584055160921244	2.7213932483096297	1.78805766811971	102.0	46.0	2.162572567832263	0.01101731232674706
1.4959505691845625	0.38073056001388994	1.2680381704663433	2.7639887396509057	1.6487687304802332	93.0	31.0	2.179736228787498	0.012219060479959923
1.5109491543456433	0.6778129300821913	1.9775862138882008	3.488535368233844	2.655399143970392	53.0	27.0	1.764037058781328	0.015747709024267312
1.1354021491445099	0.6027983900567053	1.5903700544674833	2.725772203611993	2.1931684445241886	58.0	34.0	1.7139232444392862	0.013636885998195465
0.6658371916621779	0.19627239926120454	2.361978895149222	3.0278160868114	2.5582512944104265	29.0	9.0	1.2818980275520677	0.012795767963903845
1.163096403454513	0.3888074589037205	1.6284529073400302	2.7915493107945433	2.0172603662437507	74.0	29.0	1.7142339813524936	0.010651562205657363
1.9613429390481416	0.4866751777738192	1.782293584414604	3.7436365234627456	2.268968762188423	84.0	27.0	2.1004600791919175	0.012900064657726832
2.8831295145513307	1.285362499965194	1.209824398481216	4.092953913032547	2.49518689844641	166.0	98.0	3.3830975124743237	0.010656634916065123
3.212290485873559	1.0289142284530892	1.4379275867753623	4.650218072648921	2.4668418152284515	138.0	63.0	3.233972360929044	0.012359907656233847
0.8648836387724177	0.24033642843194736	1.449141142798317	2.3140247815707347	1.6894775712302643	62.0	20.0	1.5968249835915307	0.011068954066736098
1.5128557366804611	0.7195754691328662	1.6331919770812617	3.146047713761723	2.352767446214128	89.0	49.0	1.9263183740249215	0.010748251882110527
1.5114936848082325	0.5393181433436127	1.2671553779020086	2.778649062710241	1.8064735212456213	94.0	42.0	2.192824266989868	0.012180539774357181
2.0302043017232156	0.8794918361609161	1.1263823674003517	3.156586669123567	2.0058742035612678	151.0	84.0	2.802411295205953	0.009911124720610552
0.17385266498809715	-0.5778382162294591	2.44289347994462	2.616746144932717	1.8650552637151607	10.0	-42.0	1.0711666990048367	0.011020335023095918
0.7453207954206971	0.42016567266620775	1.646000210418982	2.391321005839679	2.0661658830851897	47.0	28.0	1.4528072297335728	0.01171398450371125
0.49525750281682646	0.012199358799560356	1.4275761297676683	1.9228336325844948	1.4397754885672287	36.0	1.0	1.346921955677017	0.012276178844166184
1.3090337664933642	0.5706876811209391	1.5825441125266262	2.8915778790199904	2.1532317936475653	93.0	47.0	1.827170475774867	0.009452296133695344
1.1647640952362275	0.44979705320538765	1.694155180246131	2.8589192754823585	2.1439522334515186	61.0	27.0	1.687519129780666	0.01258173094502824
1.3370092615651683	0.5747382698416312	1.5869976712670524	2.9240069328322207	2.1617359411086836	88.0	44.0	1.8424771414426246	0.01013387035334789
1.52633572130879	0.38876201599334537	1.582960521155453	3.109296242464243	1.9717225371487983	84.0	27.0	1.9642285457597322	0.011734491598710092
2.0996057915527415	0.6840525021589965	1.140573130812891	3.2401789223656325	1.8246256329718875	121.0	54.0	2.8408339937451834	0.012552621075242085
1.2888261605017814	0.46760554780202224	2.264240429508709	3.5530665900104905	2.7318459773107313	61.0	25.0	1.5692090573532549	0.010833959461263585
2.078045820803771	0.6030197675054925	1.6158549366663595	3.693900757470131	2.218874704171852	74.0	28.0	2.2860348869502785	0.016340375623910056
1.3726232177747892	0.5775586097538197	1.533631027917926	2.906254245692715	2.1111896376717456	93.0	46.0	1.8950152890674605	0.010024016175771278
1.803266833332747	0.5457437967180345	1.733397174598056	3.536664007930803	2.2791409713160906	100.0	38.0	2.040307933899161	0.010391786946248448
1.0745796302597457	0.39015788914625515	1.9560367801899026	3.0306164104496482	2.3461946693361577	66.0	27.0	1.5493657589380398	0.009718119407757365
2.139945179520786	1.0582538417697112	1.2286106354549065	3.3685558149756925	2.2868644772246176	126.0	77.0	2.7417602597330992	0.011640819415865623
1.6033467068827656	1.1364509574565742	1.946812888511168	3.5501595953939336	3.083263845967742	99.0	75.0	1.8235751449688269	0.008844588272976713
1.40602727930772	0.4941205706068783	1.5000849119261135	2.9061121912338335	1.9942054825329918	73.0	31.0	1.9372984609933692	0.013250642128499555
1.578560127602143	0.9303568870783918	1.8970616174930348	3.475621745095178	2.8274185045714266	89.0	58.0	1.8321079890321164	0.009926187977261513
1.9238534217304446	0.769155933569051	1.233389881937665	3.1572433036681096	2.002545815506716	129.0	66.0	2.559809635139909	0.010594035356217352
2.4249452017983826	0.9916905582714814	1.3805353882836167	3.8054805900819995	2.372225946555098	119.0	63.0	2.756525202018366	0.01239704060663962
1.853186119540694	0.5603635702232859	1.1603845446872076	3.0135706642279017	1.7207481149104935	110.0	45.0	2.5970448141742852	0.01263184320309438
3.1900878333308755	1.0582468535386582	1.4751814995580534	4.665269332888929	2.5334283530967117	133.0	62.0	3.1625053149640148	0.012583847760822317
1.1713711493381471	0.7260652865404451	1.306881338038363	2.47825248737651	2.032946624578808	85.0	58.0	1.8963102580501934	0.010990416963804296
0.4618789564026393	0.1925201525240161	2.220061259965687	2.6819402163683264	2.412581412489703	26.0	11.0	1.2080478429724855	0.010907103665074372
1.407400068973044	0.46796000205979205	1.2386704576039518	2.6460705265769957	1.7066304596637438	91.0	38.0	2.13621832209955	0.012167323315444716
2.1476787297807274	0.8644567476861778	1.6497815839296266	3.797460313710354	2.5142383316158043	94.0	47.0	2.3017957956986987	0.012932901614528114
0.6773820302065152	0.22655644840708522	2.145396769561917	2.8227787997684324	2.3719532179690024	42.0	15.0	1.3157374150166332	0.009655404769950348
0.7944796340324378	0.2719836142385661	1.8141478188900162	2.608627452922454	2.0861314331285823	53.0	20.0	1.4379354459211262	0.010076902105323757
0.5956797315497928	-0.010836650713617724	1.7859671199403437	2.3816468514901366	1.775130469226726	40.0	0.0	1.3335334256151872	0.01064753813185215
1.404257270856043	0.4934875192892052	1.7056113996194886	3.1098686704755316	2.199098918908694	79.0	33.0	1.82331606787415	0.011109803475676
1.2496984883324558	0.6156793559666016	2.0106744496282394	3.260372937960695	2.626353805594841	77.0	42.0	1.6215319882159525	0.009175756372972101
2.0862855286014	0.5446441063947369	2.2914068398814393	4.3776923684828395	2.8360509462761763	86.0	28.0	1.91048236929822	0.01098749345864934
2.1364550416657075	0.395618115521047	1.5768582051067983	3.713313246772506	1.9724763206278453	89.0	23.0	2.3548808857680443	0.014041523721582783
2.071921926197035	0.5667553076653912	0.8067472357338928	2.878669161930928	1.373502543399284	154.0	64.0	3.5682417421761863	0.011994858553272774
2.296585504921498	0.7956549468692007	1.2091479150852291	3.505733420006727	2.00480286195443	121.0	57.0	2.8993420707834727	0.012797712964913355
1.778546990174445	1.1369971996537105	1.3940330569159172	3.1725800470903622	2.5310302565696277	92.0	66.0	2.2758284183799815	0.013037272445949967
1.6321538457843598	0.7315698923340774	1.4702504076845304	3.1024042534688903	2.201820300018608	99.0	53.0	2.1101196348959412	0.01099311016309975
1.4954067553542962	0.6662971510977258	1.797924897703797	3.293331653058093	2.4642220488015227	97.0	50.0	1.8317403898595215	0.00909599006942692
1.8823171496715732	0.8933592231123277	1.164252446854707	3.0465695965262802	2.057611669967035	126.0	74.0	2.6167603123847907	0.01110225427022621
0.6307903135151798	0.3218861556989645	2.1072706665911194	2.738060980106299	2.429156822290084	36.0	19.0	1.299339958324193	0.010793684166111863
0.9437999174897955	0.6516127055537515	1.6921839677401147	2.6359838852299102	2.343796673293866	84.0	61.0	1.5577407276528128	0.007704278667274831
1.0643049547250256	0.34442359794976185	1.5594792509797326	2.6237842057047582	1.9039028489294945	74.0	28.0	1.6824745850618936	0.010281982357498009
2.0760069315081964	0.9556199087697086	1.0732424020218094	3.1492493335300056	2.028862310791518	143.0	84.0	2.934331822519634	0.010936845241275733
0.7706365245027518	0.2534243141764818	1.243371790181736	2.014008314684488	1.4967961043582179	66.0	25.0	1.6197957285086164	0.010704798263902174
1.9155740747354126	0.9238723966273581	1.5667502977833554	3.482324372518768	2.4906226944107135	113.0	65.0	2.222641589694015	0.010288172557820571
0.8392673130529897	0.3226810439402241	2.053127681977513	2.892394995030503	2.375808725917737	55.0	23.0	1.4087750218460022	0.009156319165533324
2.351041571625994	1.1954121856733118	1.833435594585776	4.18447716621177	3.028847780259088	121.0	73.0	2.2823147857327157	0.00992081489551417
1.8484268982798657	0.7733857425660629	1.6825989207224705	3.5310258190023363	2.4559846632885334	99.0	50.0	2.0985546677316256	0.010912204552879001
3.8469758002121814	1.4915817005257153	1.0511533711390566	4.898129171351238	2.542735071664772	224.0	128.0	4.659766410722253	0.009956312268519011
0.031500426408686	-0.8439343778650348	3.3169850271460635	3.3484854535547495	2.4730506492810287	2.0	-22.0	1.009496704432154	0.013636200904998695
1.6023497257780437	0.5711789957274931	1.4896387248247014	3.091988450602745	2.0608177205521945	73.0	32.0	2.0756633129060242	0.01463295065911225
1.5509499947266807	0.41322969516988506	1.5245021762337942	3.075452170960475	1.9377318714036793	80.0	27.0	2.017348495072814	0.012815953540557375
1.665266881637916	0.5099519761511575	1.3809038527520778	3.0461707343899938	1.8908558289032353	74.0	29.0	2.2059252918435384	0.015635396328059683
3.1810321550084035	1.013120069677562	1.6391766563054355	4.820208811313839	2.6522967259829975	131.0	58.0	2.9406280236921987	0.011970186932991506
0.1987427864516227	0.10782777602779614	2.1858870515052726	2.3846298379568953	2.2937148275330688	11.0	-2.0	1.0909208855575414	0.012554648007363275
1.541986148961211	0.8461974242404557	1.5295109279423782	3.071497076903589	2.375708352182834	115.0	72.0	2.0081563464444256	0.008823435050110445
2.1545924127217013	0.857921763501013	1.2135293362152926	3.368121748936994	2.0714510997163056	148.0	77.0	2.7754761656124107	0.010018607510314857
1.7304129095203966	0.24889041675711976	1.4286594399420132	3.15907234946241	1.677549856699133	85.0	17.0	2.2112144162156877	0.013629034841100363
3.614604187186263	0.7378860058791361	1.7525713989339604	5.367175586120223	2.4904574048130965	87.0	27.0	3.062457591961688	0.018775463560750577
1.4010880715488447	0.5731320954606558	1.2890487266664374	2.690136798215282	1.8621808221270932	75.0	37.0	2.0869162992559236	0.014342874850547459
1.8726466444174308	0.31940555375781243	1.649470564940663	3.5221172093580937	1.9688761186984753	91.0	21.0	2.1353016441883557	0.012160443189986539
0.384668004727601	-0.24134342287972732	2.476424913758611	2.861092918486212	2.235081490878884	15.0	-8.0	1.1553319878953117	0.014879105263728343
2.0739071431348144	0.7906573222714464	1.5145898156545856	3.5884969587894	2.305247137926032	116.0	56.0	2.369286338584351	0.010821326653050611
0.9507515314992734	0.43076016787005966	1.1215890162432585	2.072340547742532	1.5523491841133181	103.0	54.0	1.8476826339507122	0.008683499749256758
1.991762052968513	1.1197372726753148	1.1811177449852057	3.1728797979537187	2.3008550176605205	124.0	83.0	2.6863365751849417	0.011590569703580232
1.5352235456008756	0.5012474853404183	1.3677290943695841	2.9029526399704597	1.8689765797100024	95.0	39.0	2.1224617154967325	0.011550409904184164
0.6933788233815337	-0.13861501373059815	2.0518098716007707	2.7451886949823043	1.9131948578701725	37.0	-6.0	1.3379352214737992	0.011666896305836155
1.1360384901906675	0.44855731799501064	1.9629205751870507	3.098959065377718	2.4114778931820613	72.0	32.0	1.5787490867186065	0.009278618301926759
1.1196537417603483	0.07125750794586283	2.300601629612815	3.4202553713731634	2.371859137558678	40.0	3.0	1.486678670200187	0.014669047637909856
2.596615510837864	1.0885274082306649	2.0765783653281358	4.673193876166	3.1651057735588006	103.0	53.0	2.250429819645912	0.01147255465226735
2.132030329355659	0.9158342640868407	1.6246284632204113	3.7566587925760704	2.540462727307252	91.0	48.0	2.3123187101680176	0.013437114002752187
2.158774911229078	0.8052125204355574	1.239572795328673	3.398347706557751	2.0447853157642304	136.0	67.0	2.7415475068220405	0.010777707211467816
3.745501772739422	1.0282387431090911	1.2616270626710873	5.0071288354105095	2.2898658057801784	149.0	64.0	3.9687868020281156	0.013437149086161946
0.9008188991411756	0.4363534376724425	1.4686528981455182	2.369471797286694	1.9050063358179607	58.0	31.0	1.6133640564619782	0.012106526669054965
0.8958193388602893	0.15031272406200302	1.9505261735605022	2.8463455124207915	2.100838897622505	57.0	11.0	1.4592706065692291	0.00973656144405862
0.8196636355957541	-0.05760591085917621	2.391400447446223	3.211064083041977	2.333794536587047	37.0	-10.0	1.3427546551105956	0.011810992308046355
1.6830385950919622	0.7926040450752541	1.755492228110529	3.438530823202491	2.548096273185783	84.0	46.0	1.9587274544094393	0.011685742998842176
1.1152082050084338	0.07562998516596586	2.060031309541355	3.175239514549789	2.135661294707321	49.0	4.0	1.5413549783652187	0.013004149100498038
0.9289218351064754	-0.052368092654465404	2.372621892362675	3.3015437274691504	2.3202537997082096	38.0	-4.0	1.3915170125069731	0.01288266343189919
0.3322749153468454	-0.23347030259136226	2.646666647109773	2.9789415624566185	2.413196344518411	24.0	-8.0	1.1255446792703183	0.007418405508732855
2.0617095085230965	1.0441119119925797	1.1891151341220834	3.25082464264518	2.233227046114663	151.0	94.0	2.7338182395981736	0.009672782181569337
2.4993731891676716	0.9378506018538323	0.88330672102302	3.3826799101906917	1.8211573228768523	194.0	104.0	3.8295643287678947	0.010037203486867496
0.015282324718894014	0.1440732205699411	2.265869759622584	2.281152084341478	2.409942980192525	2.0	-3.0	1.00674457331627	0.009697695704768318
0.6932361057737455	0.5009165552856834	1.6682930473579538	2.3615291531316993	2.169209602643637	46.0	34.0	1.4155361714607702	0.011141080337136152
1.1106346992314413	0.7267503193952791	1.511919263310534	2.6225539625419754	2.238669582705813	88.0	62.0	1.7345859836454292	0.009133233988178493
0.6248151657668046	-0.35210194381799376	2.680091701687669	3.3049068674544735	2.327989757869675	24.0	-12.0	1.2331320101373229	0.013144663149488053
1.0232355535942534	0.06418188948537962	1.8940823579758186	2.917317911570072	1.9582642474611982	53.0	-1.0	1.5402275932118243	0.011983529767165697
0.854868178950908	-0.37348528900972977	2.3713229350054297	3.2261911139563377	1.9978376459957	35.0	-15.0	1.3605026402483433	0.013062934010137316
1.410806284186453	0.36266665152116806	1.7144673641921613	3.1252736483786143	2.0771340157133293	98.0	31.0	1.8228831377325225	0.008930124488197683
3.5567902551687993	1.0831283943839212	1.1159309332875307	4.67272118845633	2.199059327671452	172.0	81.0	4.187285296134323	0.012081960338515975
2.4246286686747585	1.023848792847233	1.5923217751564713	4.01695044383123	2.6161705680037044	124.0	66.0	2.5227001894365855	0.010853404546840395
0.7287701900985502	0.14223893408077437	1.1590601742510747	1.8878303643496248	1.301299108331849	60.0	14.0	1.6287595815026983	0.011928367216259998
2.583223746586646	0.9798604533141109	1.1555399698723556	3.738763716459002	2.1354004231864665	175.0	91.0	3.2355122401105665	0.009735598477126371
0.26594848518844216	0.01575121289921544	2.2101659539423313	2.4761144391307734	2.2259171668415467	17.0	1.0	1.120329645253137	0.010245205789902753
1.1865668155411813	0.2551400278567253	2.110899139602371	3.297465955143552	2.366039167459096	44.0	11.0	1.5621144057904606	0.014965119003036471
0.37630582825591774	0.07589854280929975	1.6187003110830522	1.99500613933897	1.694598853892352	28.0	0.0	1.2324740569204784	0.01116878810284225
2.4884222870208728	0.8440605024056744	1.5541612766405037	4.042583563661377	2.398221779046178	120.0	54.0	2.601135174593901	0.011589423315462302
2.1805228659703992	1.013408084802314	1.6330046845102266	3.8135275504806256	2.6464127693125405	131.0	74.0	2.335282676561571	0.009412286099451111
2.1971453237165837	0.8582165810828313	1.1845450881078343	3.381690411824418	2.0427616691906656	155.0	80.0	2.854843134106659	0.009827347244047227
2.3116024546862044	0.6456640058098151	1.1906374103748951	3.5022398650610995	1.8363014161847102	128.0	51.0	2.941483137136059	0.012256250123050394
3.121711055597453	1.0584442033991157	1.0816067623258798	4.203317817923333	2.1400509657249955	186.0	93.0	3.8861793068717017	0.010585689015529639
1.4315856398403288	0.654797634807692	1.2780739068204459	2.7096595466607747	1.932871541628138	110.0	60.0	2.120111780860768	0.009946241573453696
2.350577592324546	0.6547721858574536	1.7379827494297564	4.088560341754302	2.39275493528721	100.0	37.0	2.352474639403519	0.012466456264858265
1.4031725007956624	0.5563256201552127	1.7523097602155575	3.15548226101122	2.30863538037077	65.0	30.0	1.8007559694371922	0.013259416980879913
0.5779192177717525	0.21004978494935433	1.9632360806553375	2.54115529842709	2.173285865604692	34.0	13.0	1.2943707195819467	0.011280329622262044
2.3108805558814067	0.7998608396412061	1.8198071250361512	4.130687680917558	2.6196679646773573	100.0	44.0	2.2698491637323928	0.01194541849061683
1.8923854906061808	0.7074023567765049	1.1812650627456927	3.0736505533518734	1.8886674195221975	109.0	53.0	2.6019990350070827	0.012774263213049229
1.9089758981140779	0.7841640484911829	1.945335344798359	3.854311242912437	2.729499393289542	108.0	53.0	1.9813094195910732	0.009219198153398563
3.2192016973131645	1.0451064539987172	1.424285664144551	4.643487361457716	2.469392118143268	132.0	61.0	3.2602219332500755	0.013015039514890024
0.37395052094521763	0.07677010639575022	1.6920223850317162	2.065972905976934	1.7687924914274664	28.0	6.0	1.2210080222657387	0.01066935848703832
1.835251846194158	0.9285175222585964	1.7760990861197816	3.6113509323139397	2.704616608378378	82.0	48.0	2.0333048761393187	0.012639833960537772
0.02218866443291745	-0.7484014893647863	2.656633698949493	2.6788223633824106	1.9082322095847069	2.0	-18.0	1.0083521730683802	0.01199959677854959
0.42248968912418094	-0.4453431958539733	2.674750236243982	3.097239925368163	2.229407040390009	20.0	-8.0	1.1579548188833744	0.011135734910840425
0.08182602068314493	-0.06321570797755527	2.5625516800169126	2.6443777007000575	2.4993359720393573	5.0	-8.0	1.0319314616447481	0.011336788419739062
0.8975388404012756	0.22756685967521983	2.076915837664484	2.9744546780657597	2.304482697339704	39.0	11.0	1.4321498368516312	0.013636380016548592
1.242691219763124	0.38436643051850794	1.6458143474819389	2.888505567245063	2.030180778000447	68.0	25.0	1.7550616031901867	0.012112263738036831
1.4387231244600343	0.37756624736015265	1.7823357965732476	3.221058921033282	2.1599020439334002	78.0	25.0	1.8072121579032137	0.011087868591092419
3.0197718030675063	0.522955781907799	2.082868399279044	5.10264020234655	2.605824181186843	101.0	25.0	2.4498140180689085	0.012926722286587826
2.228363837372637	0.99698940428315	1.6597782600052862	3.8881420973779233	2.656767664288436	115.0	63.0	2.3425671916955584	0.01077272306317333
0.17703292204463583	-0.058027162840341484	1.9207018536285356	2.0977347756731715	1.8626746907881941	14.0	-7.0	1.0921709539198863	0.009784514941003068
0.4831851351189047	0.1626990035505922	2.027761673929268	2.5109468090481726	2.19046067747986	37.0	13.0	1.2382849727022502	0.008565093538160562
2.0603383012063126	1.159961437470781	1.3520289949056945	3.412367296112007	2.5119904323764755	137.0	91.0	2.523886180673236	0.009820932726321653
2.3162834659136684	1.0236090451407982	1.617214695243352	3.9334981611570203	2.64082374038415	88.0	48.0	2.432267139747406	0.01473909989611694
1.9147584421937829	0.6831743379477306	1.0589434374492415	2.9737018796430243	1.742117775396972	113.0	54.0	2.808178203366564	0.013300307947445219
2.565802547988076	1.0168308287020302	1.2364147850946816	3.8022173330827576	2.253245613796712	147.0	78.0	3.0751956211778824	0.011100535527043346
3.0301687541472377	1.1491787840535779	1.3561131803418467	4.386281934489085	2.5052919643954246	154.0	80.0	3.234451222856929	0.011068764420607089
0.49736706700086275	0.06752363790436999	1.7303973229675025	2.2277643899683652	1.7979209608718725	34.0	5.0	1.2874294015595882	0.011045252174603493
1.0495344772225463	0.6101298838112759	1.3334486957720975	2.382983172994644	1.9435785795833733	95.0	61.0	1.787082758077049	0.008910706869582943
0.9997410331911378	0.18638716110841203	1.8475727950914826	2.8473138282826205	2.0339599561998947	46.0	10.0	1.5411104968893177	0.013866006802425525
0.9024384563323848	0.14343275908477837	2.207171042262157	3.109609498594542	2.3506038013469355	50.0	9.0	1.408866571304535	0.010092550727525323
0.9214416685910236	0.507860373772155	1.3736130145060352	2.295054683097059	1.8814733882781902	94.0	57.0	1.6708160587153311	0.007962934568340319
2.0910556956290933	1.165760256995367	1.4143607914845995	3.505416487113693	2.5801210484799664	155.0	102.0	2.4784457461056975	0.008502829078845054
3.3895308505399067	1.047802823975859	1.383529409382846	4.773060259922753	2.431332233358705	124.0	56.0	3.4499160101351816	0.01452488812368763
0.834236744358277	0.307488780674694	1.3568100563944725	2.1910468007527495	1.6642988370691665	62.0	26.0	1.6148515338802405	0.011334451354250149
1.868149987366153	0.9705022954472364	1.3436958206885532	3.211845808054706	2.3141981161357896	110.0	68.0	2.390307209863057	0.011533908714351558
0.9997881653717939	0.3798926272469405	1.5410377841748295	2.5408259495466234	1.92093041142177	60.0	26.0	1.6487758935172019	0.012227039266706053
0.8992744997041391	0.04606905507836867	2.7105431774142184	3.6098176771183574	2.756612232492587	35.0	2.0	1.3317691107809695	0.012157175988437073
1.601230449119488	0.5015212132686879	1.5369733579633964	3.1382038070828844	2.0384945712320843	92.0	36.0	2.041807550419245	0.011316998814308395
1.0953711728301072	0.20777189749065905	1.614238370646277	2.7096095434763843	1.8220102681369361	78.0	18.0	1.6785684151415408	0.009704303112224994
2.1979163326754754	0.7093138886000956	1.303340048455334	3.5012563811308093	2.0126539370554295	142.0	62.0	2.686372129269224	0.010111057927009132
0.07186853407505445	0.04279092452031574	1.8437310942729226	1.915599628347977	1.8865220187932383	6.0	3.0	1.03897994360365	0.011033560965300422
1.4997575362053839	0.7207084625068192	1.95142329269727	3.451180828902654	2.6721317552040893	79.0	43.0	1.768545472331843	0.010545683508655238
1.8396982452719823	0.8800710278237995	1.5682340592740205	3.407932304546003	2.44830508709782	116.0	66.0	2.173101830299254	0.009737006782271882
1.2927657842750033	0.4290095199327397	1.7269636713636212	3.0197294556386245	2.155973191296361	69.0	27.0	1.7485772895582843	0.011855611273245734
1.441722123955425	0.5628710829333143	1.1831275829032553	2.6248497068586802	1.7459986658365696	87.0	42.0	2.2185686013824557	0.013367780977747441
1.6635599764277507	0.44392155588023496	1.219043828135015	2.8826038045627658	1.66296538401525	98.0	35.0	2.3646432868396454	0.012800232632280754
2.0917089581954746	0.8099000384822215	1.7290823409170237	3.820791299112498	2.538982379399245	98.0	47.0	2.2097220061169156	0.011792421473292812
2.0194337763716703	0.8432493058593036	1.2768807607568002	3.296314537128471	2.120130066616104	102.0	54.0	2.5815366935082986	0.013546832717410591
1.8782500597840213	0.4652340963408328	1.3387071556339492	3.2169572154179704	1.803941251974782	98.0	33.0	2.4030328080935446	0.013039756138241447
0.9698886126446613	-0.23202158885962865	2.502443412923335	3.4723320255679964	2.2704218240637064	34.0	-5.0	1.3875766411483585	0.014320226036703663
0.5445898877004192	0.12679270348196292	1.758095825336813	2.3026857130372322	1.884888528818776	32.0	8.0	1.3097612086053885	0.012558187363849243
0.4077711868835936	-0.18279848788844788	1.9603631486074093	2.368134335491003	1.7775646607189615	26.0	-8.0	1.2080079842213232	0.01090519960236212
0.38917810462753355	-0.1784024754835043	2.404517563392957	2.7936956680204905	2.2261150879094527	20.0	-17.0	1.1618528849830374	0.01139091604025323
2.0187136402538988	0.5295278179671354	1.7072360184207442	3.7259496586746432	2.2367638363878797	105.0	36.0	2.182445554377	0.010826400608546286
2.065956623349889	0.8630323929792867	1.718438600115644	3.7843952234655327	2.5814709930949307	98.0	50.0	2.2022289438859546	0.011741901643128225
2.348014044524474	0.8822005041094503	1.549887211597858	3.897901256122332	2.432087715707308	132.0	64.0	2.5149580091726715	0.010156750476115466
1.8913815155164766	0.832565842543679	1.7130728897374996	3.604454405253976	2.5456387322811787	78.0	41.0	2.104087004614439	0.013937589113331058
2.8864005251319504	0.9098677857342812	1.4179269345822003	4.304327459714151	2.3277947203164815	113.0	50.0	3.0356482797066295	0.014303612901754517
1.3221809058100291	0.7981986624104547	1.990438423178965	3.312619328988994	2.7886370855894196	72.0	47.0	1.6642661689068232	0.010350509642152006
0.9086416551707077	0.3693030771058514	1.6649703625355436	2.5736120177062514	2.034273439641395	51.0	23.0	1.545740438158286	0.012565961624315995
1.8898866769528577	0.720586870099557	1.7395017060020581	3.629388382954916	2.460088576101615	88.0	41.0	2.086452902248905	0.012196004078632505
2.835993753801036	0.8317350842527729	1.6972768934273388	4.533270647228375	2.5290119776801117	102.0	41.0	2.670908126295332	0.014032973773334421
1.8107225578009625	0.677775717731286	1.476667124066684	3.2873896818676465	2.15444284179797	126.0	59.0	2.226222571282215	0.00923678269088411
2.292252279384062	1.0372718838865214	1.1527082587710318	3.444960538155094	2.189980142657553	175.0	102.0	2.9885797312044624	0.009077356508046378
3.635855706929137	0.8294524743392702	1.9647928828605152	5.600648589789652	2.7942453571997854	117.0	39.0	2.8505032966303014	0.013027729913452628
1.2657529265377747	0.6999036277434538	1.4431829432177843	2.708935869755559	2.143086570961238	87.0	54.0	1.8770564622358938	0.010563628457889348
1.006216271034039	0.31259131781182203	1.959608844065977	2.965825115100016	2.272200161877799	71.0	25.0	1.5134781229840997	0.008540968877931137
1.0895635409544455	0.30152065566921427	1.8122242271686375	2.901787768123083	2.113744882837852	53.0	17.0	1.6012299828132999	0.013061164141521614
1.3187093933782097	0.7641227072700558	1.7004212025744585	3.019130595952668	2.4645439098445143	100.0	64.0	1.775519260393641	0.008366070812551632
0.7790621706622485	0.20373058217101958	1.9617994306126456	2.740861601274894	2.165530012783665	45.0	13.0	1.3971161162071277	0.01096481659235159
1.021081128190066	0.3446963583968452	1.5488303738865594	2.5699115020766254	1.8935267322834046	64.0	25.0	1.6592594937480563	0.011595865537943022
3.5431012424478494	1.0812937890427545	1.724681936812824	5.2677831792606735	2.8059757258555784	118.0	51.0	3.0543505250570586	0.013768082384604766
0.17642795837162195	0.01323259748510619	2.098139407875727	2.274567366247349	2.1113720053608334	12.0	0.0	1.084087814999027	0.010589238626818575
2.357415900696726	0.6372957026428407	1.759042331553934	4.11645823225066	2.396338034196775	78.0	28.0	2.3401700791442526	0.01593004397365669
1.3257382494226486	0.8201553071360299	1.1757552562494542	2.501493505672103	1.9959105633854841	108.0	75.0	2.1275631066720684	0.010179457243149944
2.0395509051641847	0.8001335263201756	1.164052858625595	3.2036037637897796	1.9641863849457706	150.0	77.0	2.752111933793364	0.009802276164241008
1.3786995405750693	0.5884446638271608	2.038505416145409	3.4172049567204783	2.62695007997257	56.0	27.0	1.6763286129413575	0.013550999821829253
0.490870944060541	0.04847883375037032	2.142795545556331	2.6336664896168718	2.191274379306701	23.0	-1.0	1.229079692217251	0.013526293706913496
0.7500071425166595	0.2595296269151981	1.4195543223809275	2.169561464897587	1.6790839492961256	49.0	19.0	1.5283398674442557	0.012749279188874607
1.3618781648091196	0.2970625755876486	1.9990573776494593	3.360935542458579	2.296119953237108	46.0	12.0	1.6812601679349741	0.01665651095189027
1.399591904118918	0.8725958248941286	1.267767654381001	2.667359558499919	2.1403634792751296	99.0	69.0	2.1039813953940016	0.010950223954617373
2.8327174334836887	0.7284844221852282	1.341508368384208	4.174225801867896	2.069992790569436	124.0	47.0	3.1115913252897416	0.01331424869906706
2.3851097482575083	0.8097520970499454	0.9486637505166333	3.3337734987741414	1.7584158475665788	168.0	82.0	3.5141782290707324	0.010857409356699538
0.9914797683919898	0.13252713736537447	1.6837305252060653	2.675210293598055	1.8162576625714397	56.0	9.0	1.5888589376679778	0.01214529172339508
1.1307383209821915	0.41347210422105163	1.5757697761617013	2.706508097143893	1.989241880382753	66.0	28.0	1.7175783785728342	0.01200578362024653
1.6392118055073999	0.6897447062613757	1.6606180500826224	3.2998298555900223	2.350362756343998	86.0	43.0	1.9871094713355926	0.01165495710491197
2.5444110488244425	1.2711473368438573	1.5761001306536597	4.120511179478102	2.847247467497517	118.0	72.0	2.6143714471803214	0.011850120788969305
2.2667240405015496	0.9854724776663255	1.5273316252095126	3.794055665711062	2.512804102875838	107.0	58.0	2.4841073170278984	0.012384221711476543
2.2062698475035507	0.6203077115764997	1.5445261489754374	3.7507959964789883	2.164833860551937	114.0	43.0	2.4284444772703146	0.011327721253866755
1.2625310205322906	0.1829868597263058	1.3973175873097432	2.659848607842034	1.580304447036049	69.0	13.0	1.9035390608394493	0.01365712021281344
1.6911601273385073	0.5645213532853219	1.446318240002567	3.137478367341074	2.010839593287889	95.0	40.0	2.169286316499407	0.011885324274898855
1.1640399182175345	0.3812390286891445	1.821106451069326	2.9851463692868605	2.2023454797584705	66.0	25.0	1.6391937810851354	0.010969021785402907
2.267011390169653	1.2533405212947284	1.342868070202167	3.60987946037182	2.5962085914968953	160.0	106.0	2.6881862339822837	0.00897253515459643
1.566764027899282	0.48247161704701513	2.0086123186631037	3.575376346562386	2.491083935710119	76.0	28.0	1.7800231101550208	0.011091946292215764
2.02656932530245	0.578795757737993	1.5948995342889873	3.6214688595914373	2.1736952920269803	99.0	37.0	2.2706564154875766	0.012072545112981396
2.237840264454296	0.8924013248195646	1.2011822056009929	3.439022470055289	2.0935835304205574	143.0	75.0	2.863031481834704	0.010686926297670478
2.5408483258195877	0.8947658068392619	1.160928234166678	3.7017765599862655	2.05569404100594	139.0	68.0	3.1886351378502096	0.012122746561518277
2.1992187723209797	0.9921731968415186	1.0785026230004726	3.2777213953214526	2.0706758198419912	168.0	98.0	3.039140865696361	0.00960277572482263
0.3724264101388943	0.1175350095980554	2.129315466664523	2.5017418768034174	2.2468504762625785	19.0	6.0	1.1749042901201876	0.012919068720360315
1.7780769185221819	0.6112568598559189	1.874708079890354	3.652784998412536	2.485964939746273	79.0	33.0	1.9484553555805746	0.012337575330931008
0.49392051597749465	0.08666490870138199	1.8410159249017406	2.3349364408792352	1.9276808336031226	32.0	6.0	1.2682869329356052	0.011060682994782148
2.7534403418908484	1.277464629978496	1.4576993614143092	4.211139703305157	2.735163991392805	119.0	70.0	2.888894524327271	0.012970487550869745
1.925057495173011	1.0322652487416681	1.809410737498079	3.73446823267109	2.841675986239747	123.0	76.0	2.063914044101916	0.008568712197074481
1.540686869555316	0.7660195701518038	1.965489449907431	3.506176319462747	2.7315090200592347	103.0	58.0	1.7838693154154952	0.00818637184951629
0.9508255681347904	-0.30386960743025027	2.4894100634005634	3.4402356315353537	2.185540455970313	34.0	-12.0	1.3819481499307316	0.014142529923529506
2.367369987126167	0.9269018781161078	1.5690736925388986	3.9364436796650657	2.4959755706550064	108.0	54.0	2.5087691536626013	0.012401679683666685
0.883349593333058	-0.07102666567099569	1.9807059566026586	2.8640555499357165	1.9096792909316629	38.0	-3.0	1.4459771478893286	0.014379587898072524
1.532757312168397	0.5928719978239347	1.529076309697457	3.061833621865854	2.1219483075213916	90.0	42.0	2.0024073373235822	0.011255454860063768
2.6013947775972057	0.7874114327442321	1.8948793444283818	4.4962741220255875	2.682290777172614	93.0	37.0	2.372855103015519	0.01355026093377831
2.999910633869031	1.4626466879324749	1.5445804641351444	4.544491098004175	3.0072271520676193	116.0	71.0	2.9422171285513237	0.01353829319954269
1.8274802965788033	0.5183517758117495	1.726814675335857	3.5542949719146604	2.2451664511476066	100.0	36.0	2.058295555788792	0.010519698558416116
1.024334671322768	0.4739965119788636	1.9810861231643055	3.0054207944870734	2.455082635143169	69.0	35.0	1.5170571129369383	0.008842285294430173
1.4486757667179297	0.5131261114351064	1.1528267175779798	2.6015024842959096	1.6659528290130863	127.0	57.0	2.2566292441257008	0.00931880482949958
2.404684358780578	0.958576930281984	1.3343020972121808	3.7389864559927593	2.292879027494165	119.0	62.0	2.802203836601019	0.012597982232489719
2.9054515809204577	0.9768226173042347	0.8701294357140597	3.7755810166345176	1.8469520530182943	118.0	60.0	4.339102737670447	0.01809740808114423
2.2373925084138366	0.9766815867848866	1.0402822302061772	3.277674738620014	2.0169638169910638	131.0	75.0	3.1507552887550525	0.012736136216988098
2.115298873474983	0.8825996503782585	1.5632966520505993	3.678595525525582	2.445896302428858	131.0	68.0	2.3531013903857048	0.009496642190127476
0.07298304510920017	-0.17844798069595535	1.562755494384358	1.6357385394935582	1.3843075136884027	7.0	-23.0	1.0467015124064252	0.010975014659238709
1.96337229514837	0.5039342014982282	1.8410459962309333	3.8044182913793034	2.3449801977291616	79.0	26.0	2.0664439124105907	0.013425002647400631
1.380958194048514	0.7750159642289123	1.5849359110166208	2.965894105065135	2.359951875245533	86.0	54.0	1.8713022302351203	0.010635795107677036
1.7040829379384492	0.898946274165942	1.9154376903345494	3.6195206282729986	2.8143839645004913	87.0	52.0	1.8896572029136667	0.010675866781052274
1.887284712741627	0.8952529581335196	1.1920784510927274	3.0793631638343544	2.087331409226247	145.0	85.0	2.583188347219626	0.009508005819944362
1.1613619661284953	0.3387501108559501	1.5666170534681325	2.727979019596628	1.9053671643240826	69.0	24.0	1.7413183480656649	0.011767352659004037
2.1527418021333826	0.8896175674233453	1.5546456755079554	3.7073874776413382	2.4442632429313007	122.0	63.0	2.3847153959567082	0.010362124776471894
2.4398486593046718	0.989652382609201	1.5252054528537722	3.965054112158444	2.514857835462973	129.0	67.0	2.599685245512029	0.01076825750670796
0.18625836036730692	0.1730849868786979	1.3625258697517129	1.5487842301190198	1.5356108566304107	16.0	14.0	1.136700788221546	0.012323503072511175
1.2473041175801578	0.4101207752302698	2.01034540724122	3.2576495248213777	2.4204661824714897	66.0	25.0	1.6204426926275435	0.010713661542721086
0.7454220044256958	0.31040740801851685	1.9374610068619265	2.6828830112876223	2.2478684148804433	47.0	21.0	1.3847416808831903	0.01020906241834517
2.212689206659097	0.6790652925298986	2.0349574409359343	4.247646647595031	2.714022733465833	93.0	36.0	2.0873393035882946	0.011539838415111133
2.294797466480823	0.7966126915106484	1.0554229338393861	3.3502204003202087	1.8520356253500345	153.0	74.0	3.174291834016603	0.01096338665090401
2.003936896983483	0.25671175548135405	2.2590296211980285	4.2629665181815115	2.5157413766793826	60.0	10.0	1.887078627999901	0.015528042987676153
2.4068470677062312	0.9249660968458229	1.2514837865837651	3.6583308542899964	2.176449883429588	127.0	65.0	2.923194765691944	0.012282110760103711
1.3536070148840391	0.658428026832403	1.1446245006433404	2.4982315155273795	1.8030525274757434	147.0	85.0	2.18257735538881	0.007712553336145331
2.2448807457500886	0.8012635793708092	1.288932819633406	3.5338135653834946	2.090196399004215	122.0	58.0	2.741658456946243	0.012025197174177084
3.295039592607769	1.2372977304220651	1.5689642333686502	4.864003825976419	2.8062619637907154	145.0	74.0	3.100136843485044	0.011335638187967055
1.3948227637312458	0.6612509409091167	1.4014841576858195	2.7963069214170653	2.062735098594936	85.0	47.0	1.9952469002820743	0.011863896222315758
2.747644700475141	1.1604530109193778	1.517621840811949	4.26526654128709	2.678074851731327	132.0	72.0	2.8104936464311243	0.011380332469270232
2.134995341576848	0.6572967459521717	1.1813237734572697	3.316319115034118	1.8386205194094414	134.0	57.0	2.8072905917473894	0.011196830147515591
0.6882398645828478	0.06426914338540679	1.8317703483709669	2.5200102129538147	1.8960394917563737	38.0	4.0	1.3757238811049182	0.012437592933699799
2.1516142402464924	0.7386650132493331	1.6008779604585992	3.752492200705092	2.3395429737079323	120.0	53.0	2.3440214016252217	0.010327611277839386
1.4494920108425078	0.7987754999972203	1.4477516138615665	2.8972436247040743	2.246527113858787	91.0	57.0	2.0012021378282556	0.011120743318164584
1.3741140099518696	0.3875899556589588	1.9880939217100546	3.362207931661924	2.3756838773690134	60.0	20.0	1.6911715764262931	0.012847848044342627
1.3390420716896687	0.4799068864669962	1.5353743654945633	2.874416437184232	2.0152812519615595	84.0	36.0	1.8721274119086562	0.010899742459880048
2.2402564153123796	1.1526401417318453	1.3395869229809136	3.5798433382932933	2.492227064712759	115.0	72.0	2.672348674714779	0.012439546102983277
2.230922581059171	0.8124766501609173	1.0458462359301988	3.2767688169893696	1.858322886091116	150.0	75.0	3.1331267488618333	0.0110577391563585
1.685128595459958	0.793404852295176	1.3336513911664434	3.0187799866264013	2.1270562434616194	134.0	76.0	2.263545036297757	0.008861533919138246
2.311982194463428	0.9839148405969135	0.8830998009524834	3.1950819954159115	1.867014641549397	147.0	85.0	3.6180304785142035	0.01270688055728273
0.7784926892905708	0.29730511461017395	1.7896127054337776	2.5681053947243484	2.0869178200439515	48.0	20.0	1.4350062373422159	0.011086319312269416
1.612285474605363	0.7972602251527667	1.4980933319401761	3.110378806545539	2.295353557092943	114.0	66.0	2.0762249856070696	0.009327104306890863
1.2122609436175178	0.679012408616664	1.5236897526775908	2.7359506962951086	2.202702161294255	82.0	51.0	1.7956087789441408	0.010425593270251759
2.249818468824932	0.6240515251534984	1.7637781687375556	4.013596637562488	2.387829693891054	77.0	28.0	2.2755677038656543	0.01560824356253496
1.7870547106780534	0.595890577577592	1.6423048461497436	3.429359556827797	2.2381954237273356	89.0	37.0	2.0881382435591447	0.012070650313254078
1.4075118819807977	0.7196903018709246	1.4214127848972051	2.828924666878003	2.1411030867681298	85.0	50.0	1.9902203616964	0.011820573548432706
0.9450330381741905	0.03194376978747071	1.8042699272062275	2.749302965380418	1.8362136969936982	49.0	2.0	1.5237758629816	0.01265938974695053
2.090404332284005	0.9237683513986481	1.3828417593668008	3.473246091650806	2.306610110765449	109.0	60.0	2.511672841902891	0.012302301464238776
1.467723045620153	0.4270710600080776	1.7962190079017286	3.2639420535218817	2.223290067909806	85.0	30.0	1.8171180903684394	0.010257764048636217
2.452650694851544	1.0561725987507304	1.6760397750243707	4.128690469875915	2.732212373775101	108.0	58.0	2.4633606740125726	0.01215540071137554
1.8281907417339076	0.9188765506119461	1.3860163801282412	3.214207121862149	2.3048929307401873	130.0	78.0	2.3190253505984932	0.00940712086045347
2.7934775884469873	1.1203670583096872	1.484988588109224	4.278466176556211	2.605355646418911	129.0	68.0	2.8811441453592646	0.0119268893843469
2.7755282486298922	1.1296193102529748	1.0490753274252347	3.824603576055127	2.1786946376782095	178.0	100.0	3.6456901388024474	0.010543457324287832
0.9712705743803978	0.38589966832586353	1.6829090322127127	2.6541796065931105	2.0688087005385762	65.0	29.0	1.577137893842876	0.010270450074197888
1.745023990430914	0.8824412740888747	1.446222715264251	3.191246705695165	2.328663989353126	109.0	65.0	2.20660806389842	0.010572503721667894
2.6347132156474884	0.9929481185984583	1.1408741546936678	3.775587370341156	2.133822273292126	152.0	79.0	3.309381104662614	0.011434181724373408
0.17102875292197606	-0.19841839778627435	2.26011973557129	2.431148488493266	2.0617013377850157	11.0	-4.0	1.07567243019483	0.010523880718540542
1.2028746949618172	0.4364315130936187	1.4860401533299765	2.6889148482917937	1.9224716664235952	77.0	33.0	1.80944965872313	0.011257249613016856
0.8569712647426819	0.22965422268437274	1.4479751308099449	2.304946395552627	1.6776293534943176	61.0	19.0	1.5918411487242348	0.011178272920239749
1.4816505454907791	0.5361035565777013	1.6109079822118193	3.0925585277025984	2.1470115387895206	85.0	37.0	1.9197611296558563	0.011201509663425618
2.0903466349565676	0.412378514588142	1.7082184931263484	3.7985651280829162	2.1205970077144904	86.0	23.0	2.2236998038411677	0.013564259288547115
1.8250853084503345	0.8723906014734621	1.3711218561275496	3.196207164577884	2.2435124576010117	111.0	64.0	2.3310890642534945	0.011100037516142776
0.5768378516635448	0.19204541507397455	2.0547072825153965	2.6315451341789413	2.246752697589371	37.0	13.0	1.2807396735156227	0.009916034986777537
0.9097022683094622	0.5535220678825674	1.787624789118402	2.6973270574278643	2.3411468570009695	62.0	40.0	1.5088888193131946	0.009729286991872756
1.0629006612561547	0.3445726782545542	1.8035946217070542	2.866495282963209	2.1481672999616084	54.0	20.0	1.5893234812655117	0.012611562112732448
0.7892219060724717	0.32108653120542985	1.543006616856624	2.3322285229290958	1.864093148062054	60.0	27.0	1.5114831637470587	0.010101100152981261
1.877589713730552	0.7485059885889203	1.4721334464499987	3.3497231601805506	2.220639435038919	107.0	53.0	2.2754208650433814	0.011189937857509227
1.4251271086476232	0.7791420956222468	1.258137766297656	2.683264874945279	2.037279861919903	100.0	63.0	2.1327273902931707	0.011037369385298918
1.587655969517532	0.8757647643333721	1.5159318057571178	3.10358777527465	2.39169657009049	89.0	56.0	2.047313581975142	0.011746955606017644
2.1032858814628224	0.8530173051780008	1.4193642700224085	3.522650151485231	2.2723815752004093	142.0	73.0	2.4818506608100095	0.009300824875847675
1.6359045054962	0.6314683341822529	1.5657361253117759	3.201640630807976	2.1972044594940288	96.0	45.0	2.0448149461777616	0.010862845121424328
1.110967231484923	0.5903791891217998	1.4066765090759945	2.5176437405609176	1.9970556981977943	99.0	59.0	1.789781605306458	0.008569219960337283
0.5393693848357592	0.18761157204201884	1.6388222429521602	2.1781916277879194	1.826433814994179	43.0	16.0	1.3291201270640212	0.009773131013644756
1.193079634720017	0.7331329814280401	1.2816489886097662	2.474728623329783	2.0147819700378062	97.0	66.0	1.9308942193401781	0.009888220113864567
1.3553743873223045	0.49373213110750536	1.4678209174891264	2.823195304811431	1.9615530485966317	98.0	43.0	1.923392200760312	0.00972838117539913
1.104878293531108	0.8406159032182476	1.8454283822956874	2.9503066758267953	2.686044285513935	76.0	60.0	1.5987110115628842	0.009025455679011102
1.7904670494450596	1.0663668498993633	1.1877127556713392	2.978179805116399	2.2540796055707024	100.0	69.0	2.5074916396204077	0.01339641303705718
1.9076941047650555	0.8533205861271287	1.3800798977555502	3.2877740025206057	2.233400483882679	111.0	61.0	2.382307001114627	0.01138508491982824
0.9938820381938716	0.5166299377110588	1.2188997102130743	2.212781748406946	1.7355296479241331	82.0	48.0	1.8153927922586284	0.010620762154574803
1.310122458866468	0.17606705425606362	1.6288003138642682	2.938922772730736	1.8048673681203318	70.0	12.0	1.804348112972947	0.01234025658948044
1.5566769822241007	0.6974814366525321	1.5958569048950326	3.1525338871191333	2.2933383415475648	93.0	49.0	1.9754489750611386	0.010675875898338806
1.6302414614521055	0.7143576893220076	1.1012703111837692	2.7315117726358746	1.8156280005057768	130.0	71.0	2.480328167295946	0.01015915514230698
0.7002330418469036	0.1435084616966824	2.2109298890102727	2.9111629308571763	2.354438350706955	36.0	8.0	1.3167142682033959	0.011341208842131878
1.088947145850987	0.11964233615020481	2.030978880746876	3.119926026597863	2.150621216897081	46.0	6.0	1.5361686210397891	0.013763035232243296
2.6157315839411597	0.8857831933286404	1.6818325459854526	4.297564129926612	2.567615739314093	103.0	46.0	2.555286577242741	0.013269461760113807
1.2345604653128872	0.4742275885493499	1.5525410618554354	2.7871015271683226	2.0267686504047853	91.0	41.0	1.7951869973973307	0.009379268128957499
2.5005363408195356	0.7575247502487159	1.6914159951879968	4.191952336007533	2.4489407454367127	104.0	42.0	2.4783686260112536	0.012712531903812932
2.291724626689833	0.7723613991747247	1.6601272156953486	3.9518518423851816	2.4324886148700733	85.0	37.0	2.3804512118247145	0.014895655484056637
2.520486815641142	0.980098294809314	1.1903732336513626	3.7108600492925046	2.1704715284606766	160.0	84.0	3.1173920451065382	0.010316601261463094
2.7353944698163533	0.9479392959228925	1.3408794395198764	4.07627390933623	2.288818735442769	132.0	63.0	3.040000308152839	0.012244820380985955
0.7702235092002745	-0.07074022714849493	2.0605910697853043	2.8308145789855788	1.9898508426368093	46.0	-17.0	1.3737876575775538	0.010181311736637345
1.4251536912486655	0.5865131481624195	1.7605846962717722	3.1857383875204377	2.3470978444341917	67.0	32.0	1.8094774958947344	0.012963229777513444
1.784688688311621	0.3366768930354387	1.7602900413796259	3.544978729691247	2.0969669344150645	73.0	18.0	2.01386058340299	0.01402727515489557
1.1942823764045958	0.4329523883096038	1.4164802956967026	2.6107626721012984	1.8494326840063064	95.0	41.0	1.8431337732214497	0.009384689196352677
3.1624960216824203	1.0057430075588103	1.339003224859403	4.501499246541823	2.3447462324182133	146.0	67.0	3.361828532574659	0.012063766502913605
2.6838124769112053	0.9079224201311031	1.7137685243207572	4.397581001231963	2.6216909444518604	134.0	60.0	2.566029740203637	0.010222089408379355
1.7618841123829796	0.806347994472679	1.7108687142070886	3.4727528265900682	2.5172167086797677	100.0	54.0	2.029818417831981	0.010316673469835225
0.8046399722140614	0.5407353467915617	1.25973312019097	2.0643730924050314	1.8004684669825317	66.0	47.0	1.6387384433395555	0.010962855482363981
2.8710102806892386	1.0787642253000538	0.9749990559770777	3.846009336666316	2.0537632812771314	141.0	76.0	3.9446287799859534	0.014142068127773478
2.6818741861025326	0.9939679453816316	0.833486442777429	3.5153606288799617	1.8274543881590606	188.0	102.0	4.21765783875946	0.011103968235088114
2.889368608645497	1.1655918329595196	0.9028112227815823	3.792179831427079	2.068403055741102	162.0	93.0	4.200412816915684	0.012860441758050449
0.8682213703159729	0.3142160131287801	1.3587712041498408	2.2269925744658137	1.6729872172786209	77.0	32.0	1.6389753975241208	0.009378871032453351
1.1396348537506564	0.8347777481970153	1.5355172992757709	2.6751521530264273	2.370295047472786	79.0	61.0	1.7421830117369352	0.01026789978476581
1.6328980609946473	0.8249120099494431	1.5402393730029418	3.173137433997589	2.365151382952385	92.0	54.0	2.060158628337784	0.011458850840536427
1.237291076106157	0.5756691172368338	1.5146815034201258	2.751972579526283	2.0903506206569595	77.0	41.0	1.8168655082354768	0.011334889860233528
1.971424607799865	0.7373969801724303	1.6346301546248432	3.606054762424708	2.3720271347972735	103.0	48.0	2.2060370978854955	0.01119075541426872
1.6822759951840522	0.47245020854899966	1.6296407834320594	3.3119167786161117	2.102090991981059	79.0	28.0	2.032298658874468	0.013116826034117384
0.7526769828476905	0.04575705859636625	1.8773547582913106	2.630031741139001	1.9231118168876769	43.0	3.0	1.400924215054988	0.011580450316277495
3.5429010924336852	1.6764064222688333	1.3003311562308113	4.8432322486644965	2.9767375784996446	182.0	114.0	3.724614476440964	0.010481166322155667
2.2269352852881847	1.1042147317227897	1.288700142416214	3.5156354277043986	2.3929148741390036	181.0	111.0	2.7280476753210037	0.008043715872776068
2.9739629188354737	1.1090772681339505	1.2571603959369744	4.231123314772448	2.366237664070925	143.0	74.0	3.3656193183042085	0.012330084536354311
1.8131322771981528	1.1395196843683344	1.879954591523691	3.693086868721844	3.0194742758920254	115.0	80.0	1.9644553572587202	0.008544994583877762
0.8775126590257645	0.05602165192149666	2.1816069149528112	3.0591195739785757	2.237628566874308	41.0	3.0	1.4022322504623823	0.012193133035432584
1.2183110737404865	0.3296025912649456	1.6532647272398941	2.8715758009803807	1.9828673185048398	83.0	27.0	1.7369122764594649	0.00971371819417488
2.108108574729166	0.8463199106696495	1.263344291859957	3.3714528665891232	2.1096642025296064	135.0	70.0	2.668673051607734	0.010568078856212169
2.1623131021984645	0.5909233083838492	1.463642972281499	3.6259560744799635	2.054566280665348	108.0	40.0	2.4773501073338204	0.012231754854586472
2.4107995032843323	0.6290133581114798	1.7762897234127755	4.187089226697108	2.4053030815242553	100.0	35.0	2.3572107474970223	0.012495765143025321
0.4077823060080126	0.25717186985921603	1.946942703708496	2.3547250097165087	2.204114573567712	22.0	0.0	1.2094475123645279	0.013064198121829781
1.5743419136200683	0.42327749618590915	1.6139378982864698	3.188279811906538	2.037215394472379	77.0	26.0	1.9754662278465356	0.012923594506797887
2.426250948478797	0.8140935983793776	1.172241563982007	3.598492512460804	1.9863351623613845	152.0	71.0	3.069753387891336	0.01071604476631581
0.05482494555084072	-0.23657104297509512	2.678662804553904	2.7334877501047448	2.442091761578809	3.0	-5.0	1.020467281457612	0.014614963485386169
0.40496147835173923	0.12017972907025554	2.0771121729237936	2.482073651275533	2.197291901994049	20.0	6.0	1.1949637018311368	0.013524568190823356
2.7866890962489466	0.881860625847614	1.446487555890575	4.233176652139521	2.328348181738189	98.0	43.0	2.9265213066649816	0.01597099775577305
1.2401555758001843	0.38335824494134507	1.6798102253966445	2.919965801196829	2.0631684703379896	79.0	29.0	1.7382712386498023	0.010226323293085529
1.3219964375617734	0.827123094111661	1.476657662869802	2.7986541004315755	2.303780756981463	70.0	48.0	1.895262639949023	0.013368083865304034
2.498321857417838	1.0864559707010712	1.503123919199348	4.001445776617186	2.589579889900419	100.0	55.0	2.6620864224877687	0.014268256645863637
0.5304618436977178	0.18178467113609353	1.471456332249204	2.001918175946922	1.6532410033852976	38.0	14.0	1.3605012476903593	0.01200373728802569
1.6577215431325911	0.7233323433853289	1.6624898491316442	3.3202113922642353	2.385822192516973	91.0	47.0	1.9971318285031674	0.011088106296199779
0.2083882678651161	0.027792713308314898	2.14658895333859	2.354977221203706	2.1743816666469047	13.0	-3.0	1.0970787944944047	0.011138928903219752
1.6559253631880801	0.7374168791062508	1.9170752248020284	3.5730005879901086	2.654492103908279	89.0	46.0	1.863776935701145	0.010207150031765143
1.1544181326940162	0.6096400696901376	1.6180179260876162	2.7724360587816324	2.227657995777754	65.0	38.0	1.7134767261110704	0.012139478063858166
2.235443429424117	0.8487129357722385	1.4088780782318102	3.6443215076559268	2.2575910140040487	130.0	64.0	2.5866833787560055	0.010628709090781225
1.4915028036184366	0.632218446857453	1.1078320692371426	2.599334872855579	1.7400505160945956	103.0	54.0	2.346325715814935	0.012062777465735575
2.596552027545996	0.8929954247833507	1.1843020935133088	3.780854121059305	2.0772975182966595	158.0	76.0	3.192474404772144	0.010666720085119598
2.406345533565399	0.6929655371014192	1.6984183574176612	4.10476389098306	2.3913838945190804	99.0	38.0	2.4168155466855037	0.012990891527084837
0.6374061615906677	0.38076204670889346	1.6143465207448904	2.251752682335558	1.9951085674537838	56.0	35.0	1.3948385017713274	0.008729056227886606
1.434909620218451	0.5576408969921842	1.7624354395648356	3.1973450597832866	2.32007633655702	79.0	36.0	1.8141629406707491	0.011016718444027825
2.540554742238349	1.0057475655485375	1.403972048913669	3.9445267911520183	2.4097196144622064	110.0	57.0	2.8095479494795623	0.013672825893911349
1.908273979874724	0.6005131114701867	1.8368036055643606	3.7450775854390845	2.4373167170345473	69.0	27.0	2.0389101883804304	0.015114679819375072
2.0667157039928874	0.7573959323174264	1.361142518822614	3.4278582228155017	2.1185384511400405	120.0	57.0	2.51836833793172	0.011197389141647477
1.4628774436027516	0.6887158512374643	1.5161753492109615	2.979052792813713	2.204891200448426	102.0	56.0	1.9648471361601105	0.009647693822832858
3.7563541166855168	1.1426998986061805	1.3045191146596555	5.060873231345172	2.447219013265836	154.0	71.0	3.8794933508241742	0.012783452636917145
1.0286775976625506	0.21711160719692968	2.2665412726312413	3.295218870293792	2.483652879828171	46.0	11.0	1.45385345949088	0.01199737468409479
2.447377118430497	1.0281785581371907	1.419147945510816	3.866525063941313	2.4473265036480067	104.0	56.0	2.7245398030362327	0.014038956966255227
2.1751629294479926	0.7208761008068565	1.6785798438053499	3.8537427732533422	2.3994559446122063	108.0	46.0	2.2958352487522347	0.011205786136503108
2.5567709376835865	1.1684815004786961	1.4852513281148574	4.042022265798444	2.6537328285935535	139.0	80.0	2.7214399268901825	0.01046645065464025
1.2207583885311024	0.40363494766449914	2.190080914625459	3.4108393031565614	2.593715862289958	56.0	21.0	1.557403327145962	0.0116207747904285
0.4623810171048919	0.07938357867078993	1.7532838148231966	2.2156648319280885	1.8326673934939866	38.0	7.0	1.2637228571869974	0.009126489340602112
1.1967362383569038	0.36552928479656144	1.5562436741796881	2.752979912536592	1.9217729589762496	74.0	27.0	1.7689902668923077	0.011272960414268202
1.1129072715540134	0.22490967969766684	1.5644167926041304	2.6773240641581437	1.7893264723017972	69.0	17.0	1.7113879605584306	0.011399512448794084
1.7623157330823513	1.1559045759212525	1.5248838324505063	3.2871995655328576	2.680788408371759	114.0	83.0	2.1557049104850754	0.009806723047622964
2.315436760747315	0.845388331596139	1.8442105371332824	4.159647297880597	2.6895988687294214	98.0	45.0	2.2555165010316696	0.012097503511789558
0.4908544974609259	-0.2979552928847382	2.251706790072332	2.742561287533258	1.9537514971875938	25.0	-6.0	1.2179921913568321	0.011854370168466275
0.8078073205214675	0.08036755790673134	2.269471991153732	3.0772793116751997	2.3498395490604636	36.0	4.0	1.355945049628395	0.01255139181997762
1.8153397910648468	0.737345405695093	1.5960072677126647	3.4113470587775114	2.3333526734077576	101.0	50.0	2.137425767281449	0.010958743161227006
1.3237169852088357	0.7522031497833253	1.5438063619768732	2.867523347185709	2.2960095117601984	79.0	50.0	1.8574371875976667	0.011452736210237997
1.0925697424491172	0.608474158643715	1.7942841316149318	2.886853874064049	2.402758290258647	58.0	35.0	1.6089167948365892	0.012036661736637559
2.126670303550057	0.9194091003074547	1.6031379468534372	3.729808250403494	2.522547047160892	96.0	51.0	2.326567253756412	0.012823188331400647
2.695320153287987	0.9141201695429175	1.3390530519921433	4.03437320528013	2.253173221535061	143.0	67.0	3.0128553900669512	0.011205150905945795
2.1358121117855804	0.6426044429697997	1.31730074936876	3.4531128611543402	1.9599051923385598	115.0	47.0	2.6213549660615043	0.012195725674081268
0.19744359846068793	-0.2567770941179126	2.5329215916473244	2.7303651901080124	2.276144497529412	13.0	-21.0	1.077950931885056	0.009024292365817869
2.362295007783567	0.6677260529289712	1.5999293801282202	3.9622243879117875	2.2676554330571914	92.0	35.0	2.476499548745239	0.014376948990022384
1.9412590303942574	0.5198044993795841	1.5642683550093892	3.5055273854036466	2.0840728543889733	91.0	32.0	2.2410012797213463	0.012934927474421841
1.667447772972115	0.9332242304550504	1.3859476527582923	3.0533954257304075	2.3191718832133428	113.0	73.0	2.203110211019576	0.010174479178088213
2.174431538492696	0.6920320173622654	1.698545403294587	3.8729769417872832	2.3905774206568524	83.0	34.0	2.2801727491505708	0.014501745477701226
0.9725252257176109	0.5343623271594855	1.7504589451466335	2.7229841708642444	2.284821272306119	69.0	41.0	1.55558299634165	0.009374343680300072
0.23305223002324782	-0.5110839985375053	2.7598597712673727	2.9929120012906205	2.2487757727298674	13.0	-11.0	1.084443504140874	0.00974624128405488
1.9049366365571005	0.7189298562297859	2.0210409813590084	3.925977617916109	2.7399708375887943	73.0	33.0	1.9425522065743388	0.01330490794364625
1.3700849104302195	0.4757057795173889	2.1131455655132516	3.483230475943471	2.5888513450306405	65.0	26.0	1.6483627691296536	0.011266152868099838
1.424352005581012	0.5281910069359292	2.2220094381636217	3.6463614437446337	2.750200445099551	73.0	31.0	1.641019781967338	0.009924897641425371
2.3371520259034693	0.9458462888653363	1.6677118370927182	4.004863862996188	2.6135581259580545	118.0	60.0	2.40141238667333	0.010802420291719236
1.6597556949754444	0.6300973314593064	1.5978289505767331	3.2575846455521775	2.2279262820360395	76.0	35.0	2.0387568045855966	0.013702529228080402
2.673378086801714	1.0061885886647315	1.1791063317685637	3.8524844185702776	2.185294920433295	143.0	74.0	3.267291774094592	0.012028840108288412
0.459999688749662	-0.5914549676270315	2.4154109847088647	2.8754106734585267	1.8239560170818332	20.0	-28.0	1.1904436518926849	0.013236807059183748
1.1394587310237367	0.5584896364846015	1.548258153749024	2.687716884772761	2.1067477902336256	78.0	43.0	1.7359617181828486	0.010334222512968281
1.4587134117011684	0.6515549838229011	1.6688369524202902	3.1275503641214586	2.3203919362431913	102.0	53.0	1.8740898321945816	0.008972179291778274
1.918015703071832	0.6312914267100598	1.651556291444416	3.569571994516248	2.2828477181544757	101.0	42.0	2.1613383770252095	0.011119249568064678
1.9185500553782393	0.9029651052192202	1.371083321220197	3.2896333765984362	2.274048426439417	129.0	74.0	2.3992950141577274	0.00986414500329655
1.3097046909046244	0.7218149428335983	1.3514498048603152	2.6611544957649396	2.0732647476939134	115.0	72.0	1.9691108661190673	0.008574950360089746
1.2017476947383154	0.7011369173126307	1.7670976931845672	2.9688453879228827	2.468234610497198	60.0	38.0	1.6800686229025579	0.012686782398568103
0.694704036812098	0.23599787354379353	2.1411928458330896	2.8358968826451876	2.377190719376883	44.0	16.0	1.3244472062215416	0.009427682269751008
1.5838277483002081	0.6271877606716998	1.5041719098172346	3.0879996581174427	2.1313596704889344	98.0	47.0	2.05295660553364	0.010697970440565335
1.8531737168516305	0.988627052020449	1.5188636826777921	3.3720373995294226	2.507490734698241	106.0	66.0	2.2201053577003313	0.010958363266505532
1.4987206600319904	0.83701616166945	1.4931807043190273	2.9919013643510177	2.3301968659884773	115.0	73.0	2.0037101709772562	0.008795384590324706
3.1565989924712854	1.1030756339677563	1.1792150762327374	4.335814068704023	2.2822907102004937	141.0	71.0	3.6768645144495076	0.013417685835131449
1.3433913424534765	0.49869722851491693	1.3844804552722716	2.727871797725748	1.8831776837871885	98.0	44.0	1.970321637505013	0.010086919134597735
0.0562898510592178	-0.00857482729171588	2.1911183314639366	2.2474081825231544	2.1825435041722208	4.0	-14.0	1.0256900096406976	0.012198258876291881
0.9588143919232759	0.3976692745606938	2.018198273785348	2.977012665708624	2.415867548346042	68.0	31.0	1.4750843385297898	0.00837011109688904
2.255621621705181	0.5688635757431144	1.5932816309770037	3.848903252682185	2.162145206720118	79.0	27.0	2.415708044234483	0.016313411603620088
2.160126044117975	1.044516813408642	1.2527016070749868	3.412827651192962	2.297218420483629	120.0	72.0	2.724373970559351	0.012150628180151278
0.9359394835725854	0.2626595605414055	2.0840776855588867	3.020017169131472	2.346737246100292	51.0	16.0	1.4490904969896046	0.01070295390591977
1.5313949421384663	0.736908311331472	1.5948983920596096	3.126293334198076	2.3318067033910816	102.0	57.0	1.9601833883353932	0.009613748856196517
2.0298859706295067	0.7900262089427781	1.387494123124619	3.417380093754126	2.177520332067397	127.0	63.0	2.4629870763403523	0.010320706808104796
1.9924543856383994	0.8872092799436468	1.3606811356969706	3.35313552133537	2.2478904156406174	107.0	59.0	2.4643066133329032	0.012275299715448008
1.2300088235848468	0.21422547785991242	2.0457955615264476	3.2758043851112943	2.26002103938636	53.0	11.0	1.6012374094052142	0.013061292820034872
1.2883381010621795	1.1075325279864727	1.5419552218439323	2.830293322906112	2.649487749830405	93.0	82.0	1.8355223827586464	0.009523812033494018
1.6719672923322075	0.7192274235340668	1.8027433456430322	3.4747106379752397	2.521970769177099	87.0	44.0	1.9274571981492035	0.011008125854172733
0.36621859700159165	0.09571084255346873	2.029466618326555	2.3956852153281467	2.125177460880024	19.0	5.0	1.1804506630927323	0.013296541412322928
1.9143135746143674	0.5934822157950472	1.6776394144957545	3.591952989110122	2.2711216302908017	94.0	37.0	2.1410757032015426	0.011810062438647668
1.311330663951531	0.6610339533664211	2.342636037145024	3.653966701096555	3.0036699905114452	94.0	52.0	1.5597671354657605	0.006896028589682234
2.460958618333382	0.65030916013631	2.0839371015105956	4.544895719843978	2.7342462616469057	90.0	31.0	2.1809178964900107	0.012639724256820528
1.0753776111651523	0.5228726994788482	1.5094207410899045	2.584798352255057	2.0322934405687527	86.0	47.0	1.7124439077130056	0.009130079204367062
1.3561616128166316	0.5290749234616126	1.4168541801588221	2.7730157929754538	1.9459291036204347	92.0	43.0	1.9571638576558477	0.010645764245309249
1.7594465288304098	0.8215687042311144	0.9987565559873137	2.7582030848177235	1.820325260218428	133.0	78.0	2.7616370258427203	0.011102452365697135
2.162083599784909	0.9101071969881434	1.0241503433610084	3.186233943145917	1.9342575403491518	167.0	93.0	3.1110998143978397	0.009864004108767681
0.5020982784463071	-0.32865633085450696	2.3734777290279596	2.8755760074742667	2.0448213981734527	22.0	-8.0	1.211545392781898	0.013183259953882302
0.765672604773382	0.2023854943073926	1.4148653111012495	2.1805379158746314	1.617250805408642	56.0	17.0	1.5411628928674679	0.011345806458937919
1.9351944518992128	0.813580721514104	1.2853700606416907	3.2205645125409035	2.0989507821557947	119.0	63.0	2.505554323346471	0.011229913706961237
1.260953277670172	0.6036687743276912	1.6422166079088347	2.9031698855790067	2.245885382236526	92.0	50.0	1.767836149992323	0.009032797431590472
0.7148499485223938	0.3265745388196868	1.728515787200062	2.443365735722456	2.055090326019749	51.0	25.0	1.4135628692638926	0.00998672099069991
2.715044029680099	1.0559917955863694	1.4082951708284455	4.1233392005085445	2.464286966414815	145.0	75.0	2.9278941559410048	0.010762940283342027
1.2363651709575227	0.7081419776891236	1.373298030025438	2.609663200982961	2.0814400077145616	89.0	57.0	1.90028904427586	0.01052521451127049
0.9480426278434657	0.21765086857831406	2.2089095449656897	3.1569521728091554	2.4265604135440038	39.0	10.0	1.429190335115416	0.01355784375944188
1.931045443391535	0.513796345079027	1.8015135114035605	3.7325589547950955	2.3153098564825876	91.0	31.0	2.0719017266137825	0.011677284171908154
3.9432896121517134	1.1812905102190785	1.1089486006295506	5.052238212781264	2.290239110848629	139.0	66.0	4.555881318496732	0.015853117138246196
0.6898008014848698	0.1825848291360621	1.8318154180457509	2.5216162195306207	2.014400247181813	38.0	11.0	1.376566762507532	0.012461475170600006
0.6526157613676924	0.04588706302162393	2.0716292967158965	2.724245058083589	2.1175163597375204	26.0	2.0	1.3150253582541376	0.015803624798186203
0.2922623226387375	0.20257823509642758	1.2886440980324216	1.5809064206711592	1.4912223331288492	29.0	20.0	1.2267983247546634	0.010532075059193478
0.9817797711353542	0.23587479775768871	1.8598823003380782	2.8416620714734324	2.095757098095767	72.0	20.0	1.527871990048452	0.008613009505349767
0.8727606826088636	0.08231972773431173	1.7906286831241625	2.663389365733026	1.8729484108584742	54.0	6.0	1.4874046142755473	0.010807493449837858
1.2705879272151999	0.4402803664181121	1.4287219662448043	2.699309893460004	1.8690023326629164	91.0	38.0	1.8893178359640976	0.010198504707713458
1.8681942432938685	1.1515666900515233	0.9440162343591386	2.8122104776530072	2.095582924410662	168.0	122.0	2.9789852920931215	0.009430065872465173
1.7864090216670157	0.7114052345831356	1.615348318010268	3.4017573396772836	2.3267535525934036	101.0	49.0	2.105897100798331	0.010744349445332407
1.2192947218352246	0.4581217852502648	1.4662940152001247	2.6855887370353493	1.9244158004503895	70.0	31.0	1.8315485906616151	0.012653101101443265
1.2370212940236025	0.632791610107396	1.3879216587237797	2.624942952747382	2.0207132688311757	96.0	56.0	1.891276021415407	0.00967747296971336
1.185898362557069	0.411387142825405	1.6957141459208904	2.8816125084779594	2.1071012887462954	84.0	34.0	1.6993503978307876	0.009216666987148557
1.7694485992262938	0.5538035070249727	1.4475622447641874	3.217010843990481	2.00136575178916	107.0	43.0	2.2223644307015915	0.01086882466086493
1.2022267584257127	0.5734323866088145	1.590739616278188	2.7929663747039006	2.1641720028870024	65.0	35.0	1.7557659004171478	0.012689070319403462
2.918124514183675	1.001868644384942	1.324182617518202	4.242307131701877	2.326051261903144	125.0	60.0	3.2037175806255913	0.013546346568782362
0.03680141505767187	0.03180695793866439	2.6068703627992686	2.6436717778569405	2.638677320737933	3.0	-4.0	1.0141170867500118	0.010112115481134035
0.24110868427486176	0.04963967004822312	2.272915370261554	2.514024054536416	2.322555040309777	15.0	3.0	1.1060790416702213	0.010389606135004373
1.5621652275227564	0.8162822294400183	1.5814016292972313	3.1435668568199877	2.3976838587372495	105.0	63.0	1.987835853069771	0.009530756060294967
1.6108446134729366	0.3533617887994702	2.1968052032350256	3.807649816707962	2.550166992034496	60.0	16.0	1.733266932862686	0.013449048385839144
1.7425698734503818	0.7179954024030979	1.1929568539917113	2.935526727442093	1.9109522563948091	87.0	45.0	2.4607149182467327	0.015105552634970492
2.2417826729868575	1.0589101960538776	1.1230774158871482	3.3648600888740057	2.1819876119410258	153.0	92.0	2.9961069836098653	0.010415060130310882
1.3733328393115665	0.5443207396958636	2.0590790514467394	3.432411890758306	2.603399791142603	62.0	28.0	1.6669646016488013	0.01208563063460121
1.0986026675245324	0.42605694602933997	1.9466857488094227	3.045288416333955	2.3727426948387627	53.0	23.0	1.5643451533954205	0.012414593472502757
1.4320625317750941	0.7605042884502964	1.4337810774211428	2.865843609196237	2.194285365871439	84.0	51.0	1.9988013890871403	0.012037772600026711
0.5566003358576301	-0.24266276408931597	2.124985183507533	2.681585519365163	1.8823224194182169	25.0	-7.0	1.2619313961233825	0.013984728396115977
1.3880632030539366	0.5671187170679861	1.5604614723389827	2.9485246753929193	2.127580189406969	79.0	38.0	1.8895209703404996	0.011769493974997235
1.1755282731272987	0.4529893749252174	1.6058133570893147	2.7813416302166134	2.058802732014532	85.0	38.0	1.7320453949007202	0.009434246927663157
2.732131052208535	0.7745215159174965	1.2976362813369484	4.029767333545483	2.072157797254445	139.0	57.0	3.1054675269973444	0.01184645276816085
0.03251211941864529	0.05210971950849386	2.288514101344968	2.3210262207636134	2.340623820853462	3.0	-3.0	1.014206650245038	0.01017581971524919
0.8366068933637414	0.44359009336319044	2.3206776508999676	3.157284544263709	2.764267744263158	45.0	25.0	1.3605011204547526	0.010094048743965666
0.8836093908737495	0.29432056763572345	1.5778687673370764	2.461478158210826	1.8721893349727998	53.0	20.0	1.560001825985181	0.012337456110882302
2.2297648464614124	0.5852853010439216	1.4797567081844933	3.7095215546459057	2.065042009228415	92.0	33.0	2.506845574092447	0.01457003435676744
2.786276614064437	1.1010875798212885	1.2358396261704585	4.022116240234896	2.336927205991747	164.0	88.0	3.254561639764194	0.010444559744819788
1.040285775509585	0.2648906208512187	1.3401790511943603	2.380464826703945	1.605069672045579	87.0	27.0	1.7762289483502132	0.00963741338282509
2.757294832067217	1.0194189410160066	1.23906699411502	3.996361826182237	2.2584859351310267	159.0	81.0	3.225299233344975	0.010692614022499271
1.3165940767535438	0.5059657359560337	2.395154550603927	3.711748627357471	2.901120286559961	49.0	21.0	1.5496906562549673	0.013166255387056942
1.3362135531918238	0.9909386606674295	1.40982024048545	2.746033793677274	2.4007589011528796	130.0	103.0	1.9477900194791635	0.007456109742570911
1.8764299891392735	0.862258869076979	1.391324996724498	3.2677549858637716	2.253583865801477	109.0	61.0	2.3486640386371445	0.01140592925753682
1.2498002245781086	0.31553445153466986	1.2321454340327302	2.481945658610839	1.5476798855674	87.0	28.0	2.0143284956935608	0.011747662517718587
2.9108767298600737	1.4381918298093803	1.411135666830661	4.3220123966907344	2.8493274966400413	181.0	113.0	3.062790132998165	0.008971369526012525
1.557759556019999	0.9535767048332005	1.5474509537346586	3.1052105097546576	2.501027658567859	104.0	71.0	2.006661666568793	0.00975531447994077
1.8964576284149537	0.6931446812511282	2.1147968949792926	4.011254523394246	2.8079415762304207	71.0	31.0	1.8967563896643242	0.013193348539767741
2.3071907138215213	1.0045235306354867	1.7604548409998937	4.067645554821415	2.7649783716353804	129.0	69.0	2.3105651221993835	0.009439419935654227
1.3762791366411689	0.3231500884621459	1.4907859350596993	2.867065071700868	1.8139360235218451	71.0	21.0	1.923190314769139	0.013478593367635208
2.8169116850484164	1.1473107700884808	1.3362290832292059	4.1531407682776225	2.4835398533176867	162.0	88.0	3.108105354390963	0.010161710603217237
0.5169845164574254	0.3632926242833723	1.676731866741661	2.1937163831990865	2.0400244910250334	38.0	27.0	1.3083286759868558	0.010479054530613409
1.971549606681092	0.9032830017016766	1.5883827732124307	3.5599323798935227	2.4916657749141073	96.0	53.0	2.2412307914254974	0.012255697036426729
0.3726046544142898	-0.0874740608066964	2.033882674961146	2.4064873293754356	1.9464086141544494	26.0	-3.0	1.1831986962676733	0.009707694715466907
1.8430208204867888	0.6304298670681505	1.911722519381514	3.7547433398683028	2.5421523864496645	91.0	38.0	1.9640629337164728	0.010820457312422191
1.6792398481997717	0.7200444607973191	2.1679365114104194	3.847176359610191	2.8879809722077385	63.0	31.0	1.7745798086620577	0.01334641062218892
1.6757763897118634	0.4667288713906681	1.442307597050881	3.1180839867627443	1.909036468441549	67.0	24.0	2.16187170693572	0.0168527410760484
2.4156741245395605	0.7627261055285302	1.4975565210098631	3.9132306455494237	2.2602826265383933	99.0	42.0	2.613077096355985	0.01414030296563028
2.978953020778153	1.0667278259498991	1.2879174833251301	4.2668705041032835	2.3546453092750292	136.0	68.0	3.312999908260526	0.012801023433108282
2.004002103172503	1.0973901225697937	1.6648929792883869	3.6688950824608897	2.7622831018581806	104.0	66.0	2.203682235496638	0.01106714763612205
1.0563322674168127	0.2978391927204711	1.573895825031218	2.630228092448031	1.8717350177516892	81.0	27.0	1.671157678047631	0.00926059827285459
2.081036649443549	0.8466875521246109	1.6117096823461432	3.692746331789692	2.458397234470754	109.0	55.0	2.291198205382878	0.011075020997237244
2.6338397789123613	1.1754802756832627	1.096209139244432	3.7300489181567933	2.2716894149276947	122.0	72.0	3.4026800038610783	0.014600590770258827
1.463166247849165	0.4675171297506995	2.0953535672964994	3.5585198151456643	2.562870697047199	72.0	27.0	1.6982908615928693	0.010761740372587682
0.9573002328124436	0.15591514084773594	2.0340639763869155	2.991364209199359	2.1899791172346514	48.0	9.0	1.470634278924149	0.011839117406821984
1.1113395518818494	0.4747110625781159	1.5952936741014627	2.706633225983312	2.0700047366795786	70.0	34.0	1.696636343466856	0.011053295234584601
1.6209185917787687	0.5824949099641903	1.4383138483834763	3.059232440162245	2.0208087583476666	92.0	41.0	2.1269575090308157	0.01196473859743264
2.2371752006216576	0.8865130799458645	1.8115408300914488	4.0487160307131065	2.6980539100373133	108.0	53.0	2.234957094789148	0.010843431175517499
0.5232669965209338	0.28326512980908714	1.8882719790089806	2.4115389755299144	2.1715371088180677	29.0	16.0	1.277114209360645	0.012603126702859145
0.6411220551644092	0.33219359081284994	1.9628551842518962	2.6039772394163054	2.295048775064746	48.0	26.0	1.326627282699289	0.008675810659128898
0.7085618351158893	0.24744060507094456	2.000491850258009	2.7090536853738985	2.2479324553289537	40.0	15.0	1.3541938123989379	0.011216262369141226
1.653833956101182	0.8437169097893844	1.3067718677968485	2.9606058238980304	2.150488777586233	111.0	67.0	2.2655873583270987	0.010726228368287282
1.1779464145313516	0.3834085064929038	1.4584953270051202	2.636441741536472	1.841903833498024	105.0	41.0	1.8076449699363462	0.008212609167425841
3.072093020779672	1.1997461028693739	1.409589129240784	4.481682150020456	2.609335232110158	140.0	74.0	3.179424455716628	0.012005508131504172
1.5538170187522753	0.6403730699526604	1.8506621713614582	3.4044791901137335	2.4910352413141186	81.0	39.0	1.8396005725935352	0.010992406898542419
1.1367719571436203	0.2613006491564174	1.344133684228821	2.4809056413724413	1.6054343333852383	70.0	20.0	1.8457283456859637	0.012814351199119327
3.1357262260093766	1.1800063329994035	1.4678226153366716	4.603548841346048	2.647828948336075	125.0	64.0	3.136311427038574	0.013298942114419359
1.226973322400674	0.44161586930299346	1.647208631974164	2.874181954374838	2.0888245012771574	76.0	32.0	1.744880337914547	0.010708374683951935
0.9548476154273668	0.3796195951707446	1.396040182678731	2.350887798106098	1.7756597778494756	66.0	30.0	1.6839685757434282	0.011567157180986172
1.895371851134541	0.8589343367855209	1.7689893251009896	3.6643611762355306	2.6279236618865105	93.0	50.0	2.0714433514325115	0.011419960509932957
1.2778690608563952	0.48130894604618635	1.8619764066223905	3.1398454674787857	2.343285352668577	76.0	33.0	1.686297128315626	0.010051450185429118
0.8874554590917272	0.4931915266068361	1.5447597481771471	2.4322152072688743	2.037951274783983	78.0	47.0	1.5744941633408984	0.00850504427797727
1.593354177640807	0.5710004573174776	1.4971741975867234	3.0905283752275303	2.068174654904201	84.0	37.0	2.0642410083002463	0.01259772796320224
1.876972091683444	0.8241753149989337	1.6329154171499283	3.5098875088333723	2.457090732148862	104.0	55.0	2.1494606958635307	0.01071820126258429
3.2157377451149216	1.3205964984229392	1.24716985649338	4.462907601608301	2.567766354916319	144.0	81.0	3.578428053221627	0.012862419395536003
0.9207000945877579	0.3498680958865934	1.5555327671664283	2.476232861754186	1.9054008630530217	56.0	24.0	1.5918873031938203	0.012195240085027833
2.0233708377221538	0.8243367738012146	1.320469682731255	3.3438405204534085	2.1448064565324696	137.0	71.0	2.532311467793051	0.009856285760712395
1.091756895542146	0.17664449441693453	1.4946400861359392	2.586396981678085	1.6712845805528738	55.0	11.0	1.730448022683937	0.014650844593504929
1.1072445285449835	0.16409760899892856	2.4440901345518156	3.551334663096799	2.608187743550744	47.0	8.0	1.4530293350854773	0.011718778906783956
1.2321832984181953	0.5628523500002351	1.6467720888011834	2.8789553872193787	2.2096244388014186	77.0	40.0	1.748241548905046	0.01060400698866199
1.0119416571093687	0.18530476478946323	1.7808206412708116	2.7927622983801803	1.9661254060602749	51.0	11.0	1.568244568631705	0.012983011322200885
0.019333713859088775	-0.43135627315529046	2.468247180044068	2.4875808939031567	2.0368909068887775	2.0	-26.0	1.007832973137943	0.011256562655082854
1.3103307612900772	0.74287027611151	1.3318145477571326	2.64214530904721	2.0746848238686426	69.0	44.0	1.9838687852575003	0.01453406776209292
0.4686278543845397	0.14094514714509732	2.501297034459792	2.9699248888443317	2.6422421816048893	26.0	0.0	1.1873539399473	0.00991000216051959
0.9801872224075816	0.4289212549170518	1.503730231162458	2.4839174535700397	1.9326514860795099	59.0	29.0	1.6518371461148642	0.012483990674306089
1.3800621335309446	0.3449654708832566	2.076787546760899	3.456849680291844	2.4217530176441557	64.0	19.0	1.6645177238679925	0.011668321149983172
3.653355945932122	1.3600661412297086	1.3420970649097685	4.99545301084189	2.702163206139477	155.0	82.0	3.7221249799676324	0.012312509730036598
2.3832592077918253	0.779445425507842	1.4755887109729346	3.8588479187647597	2.2550341364807767	103.0	45.0	2.6151243161926976	0.013596858137879364
2.8977786010946	1.1625927525240187	1.1537788565743896	4.05155745766899	2.3163716090984083	165.0	91.0	3.5115546056184526	0.011049450424642561
1.1888365651451906	0.6707681357457587	1.5731055011594697	2.7619420663046603	2.2438736369052283	85.0	53.0	1.7557258964951488	0.009667471776788061
2.768099477241167	1.079652878047136	1.7012488867971716	4.469348364038338	2.7809017648443075	115.0	58.0	2.627098479666008	0.012223423530615157
3.451421774459809	1.2994272685252015	1.3198074459144415	4.77122922037425	2.619234714439643	166.0	88.0	3.6150949406626944	0.011236566885732505
1.8381037691104811	0.5628098378837236	1.2286535689108533	3.0667573380213344	1.791463406794577	115.0	47.0	2.4960309525978737	0.01157575284893077
2.094438036055971	0.6529399721706428	1.694000411382781	3.788438447438752	2.3469403835534237	80.0	32.0	2.2363857895089416	0.01469834282158019
1.6178174501730735	0.6428826786640687	1.3274245880818172	2.9452420382548907	1.9703072667458859	114.0	56.0	2.218764112627208	0.010174834477092422
1.182761552576246	0.48854598654850157	1.5157431812359194	2.6985047338121655	2.004289167784421	65.0	31.0	1.7803179108560039	0.013002107591149694
1.931432262422295	0.49361130655765884	2.303757909156476	4.235190171578771	2.7973692157141348	70.0	22.0	1.8383833452055263	0.012730980189725924
1.1608962125931888	0.7741576365009764	1.7168998953365253	2.877796107929714	2.4910575318375017	69.0	49.0	1.6761583571333636	0.010958212586384176
1.2030978243474295	0.4841953255610121	2.275248723138911	3.4783465474863404	2.759444048699923	45.0	20.0	1.5287763979876658	0.013917668421693603
2.677724042383554	1.1034013951295922	1.6391567790015593	4.316880821385113	2.7425581741311515	112.0	59.0	2.6335984920335718	0.012585904637862995
2.100485110714925	1.063092002386969	1.300607835515359	3.401092946230284	2.363699837902328	178.0	110.0	2.615002657494078	0.007835098376330455
2.2606937618819636	0.7167895184773008	1.0412320579653842	3.301925819847348	1.758021576442685	131.0	59.0	3.171171877188899	0.01280781594987219
0.06823431421991488	-0.4357572534594476	2.235622685148458	2.303856999368373	1.7998654316890106	5.0	-31.0	1.0305213910527946	0.010843612984330607
1.994863377396936	0.4773125987465434	2.252011866719108	4.246875244116044	2.7293244654656514	67.0	20.0	1.8858138835223792	0.013866474231110294
1.2428796373591482	0.5486543322398869	1.1210379157814685	2.3639175531406167	1.6696922480213554	104.0	55.0	2.1086865304575757	0.01044994801321042
1.5103450265908824	0.7580679624507485	1.3986300006211665	2.908975027212049	2.156697963071915	94.0	55.0	2.0798746100970953	0.011360178009502283
2.0700409900375742	0.8380109791345449	1.4842826267867213	3.5543236168242958	2.322293605921266	120.0	61.0	2.3946407191458836	0.010586632074661956
0.9445424801696058	0.28578311956053404	1.914073364932322	2.858615845101928	2.199856484492856	50.0	17.0	1.4934724538121364	0.011809604658461675
0.34249913328484016	-0.151633384143254	2.293122308771732	2.6356214420565722	2.141488924628478	19.0	-14.0	1.1493592958276584	0.011157214590649814
1.4264683788177952	0.7563843641513119	1.5613633341279187	2.987831712945714	2.3177476982792307	116.0	70.0	1.9136043787108223	0.008141674746332237
2.107004847951275	0.9524231686048377	1.2606335199059755	3.3676383678572503	2.213056688510813	111.0	63.0	2.6713857078054106	0.012887166312882285
1.2890941903498305	0.694721119490799	1.7374751701344668	3.0265693604842974	2.432196289625266	67.0	40.0	1.7419353165490503	0.012131682624216204
1.2910173393533328	0.4469783381304415	1.3772000220852336	2.6682173614385665	1.8241783602156751	81.0	34.0	1.937421811392792	0.011926726108274536
2.3746563018645848	0.7101283139824888	1.4078557330717294	3.7825120349363144	2.117984047054218	122.0	50.0	2.6867184940060884	0.011783844365104337
0.7237470184633974	0.3370072348146258	2.283693053741464	3.0074400722048615	2.62070028855609	37.0	18.0	1.3169195690627749	0.011032423211215874
2.650782073700939	0.9836606885977552	2.0513512439070016	4.702133317607941	3.035011932504757	109.0	51.0	2.2922126727806313	0.011080934299646352
1.8185796364434192	0.888812118097112	1.332674765127804	3.151254401571223	2.221486883224916	129.0	76.0	2.3646087432810488	0.009700011638826991
0.6572084648459966	0.13951130612187645	2.1927415547133626	2.8499500195593592	2.332252860835239	35.0	8.0	1.2997199845249923	0.011123554067394252
1.2049511738839467	-0.513815464066512	2.721495559305703	3.9264467331896498	2.207680095239191	35.0	-15.0	1.4427533125173826	0.01555366598225092
1.9512776867042785	0.7741070009238387	1.7176650971308836	3.668942783835162	2.491772098054722	103.0	50.0	2.136005901245599	0.010734466988563902
1.0792315605864229	0.48217333814345786	1.5418299522936423	2.621061512880065	2.0240032904371	79.0	40.0	1.6999679562463725	0.009814199389267853
1.2594066251276446	0.22876314434994383	1.499480122470529	2.7588867475981735	1.7282432668204728	74.0	17.0	1.8398955119542755	0.012049641611775496
1.161940110706428	0.31800214971340734	1.7412397919647202	2.9031799026711482	2.0592419416781276	65.0	21.0	1.6673062010576716	0.011523735622463947
1.0974966259516488	0.5283533069860127	1.5817419580261838	2.6792385839778325	2.1100952650121965	65.0	35.0	1.6938531410781992	0.011879824950823096
1.7221105451939065	0.8151878695932362	1.8284585476294326	3.550569092823339	2.643646417222669	109.0	60.0	1.9418373456847546	0.008865021863050064
1.8421439743684056	0.22065869481286593	1.5308087069260545	3.37295268129446	1.7514674017389205	89.0	15.0	2.203379603234377	0.012951341673008626
2.2326258470246625	0.5676167143640907	1.8051380106409445	4.037763857665607	2.372754725005035	107.0	36.0	2.2368172593251923	0.01095705092199759
1.2773338920545478	0.46516023143380725	1.3832699277294662	2.660603819784014	1.8484301591632735	89.0	39.0	1.9234162230008105	0.010723534005296737
1.9926354363881442	0.7643255392143473	1.3476256855734632	3.3402611219616074	2.1119512247878105	100.0	49.0	2.4786267861466342	0.013227687445457015
1.2536029471946946	0.8826209884166305	1.5706070654626307	2.8242100126573253	2.4532280538792612	76.0	57.0	1.798164591743664	0.011287001085035352
2.276672169796499	1.1767427925856173	1.596372363703794	3.8730445335002934	2.7731151562894114	131.0	81.0	2.4261535851913147	0.009835929859193793
1.3942247843843907	0.34634975788845535	1.1178727330453264	2.512097517429717	1.4642224909337818	91.0	30.0	2.2472124448247537	0.012979294656573033
1.9215293894696657	0.8889946486102118	1.2568180903722672	3.178347479841933	2.145812738982479	112.0	64.0	2.528884254761572	0.012058567634086272
2.4483578863397013	0.7552623094695061	1.3420496868850607	3.790407573224762	2.0973119963545668	101.0	43.0	2.82434220600462	0.014979149005763517
0.7619460577902513	0.058945193784425864	2.0528721364030584	2.8148181941933097	2.1118173301874843	34.0	-8.0	1.3711609916072491	0.013799938535447007
1.6719311130654568	1.0789068894042924	1.2868147234820873	2.958745836547544	2.3657216128863796	135.0	98.0	2.2992788181201833	0.008964040467277357
1.5101045227697054	0.8054118832593096	1.3101605091088064	2.820265031878512	2.115572392368116	105.0	65.0	2.1526103193240838	0.010635453618533866
1.700102110299937	0.46054471107112516	2.141261696666666	3.841363806966603	2.6018064077377914	73.0	24.0	1.7939721300514138	0.011710520523445728
2.218869381315125	0.7806416168248718	1.6960096905797588	3.914879071894884	2.4766513074046306	96.0	43.0	2.30828815049791	0.012703403485814117
1.6059090686033397	0.9781826731328243	1.82076905191181	3.4266781205151498	2.7989517250446343	76.0	51.0	1.8819949278669543	0.012163503198512183
1.0269874177916092	0.6123899180547092	1.2041991277187105	2.2311865455103197	1.8165890457734197	100.0	66.0	1.8528385332226414	0.008987244063412607
1.9954858393328947	1.1089969595590605	1.5099938263217898	3.5054796656546845	2.6189907858808503	79.0	51.0	2.3215192039517936	0.015577810450534222
0.41306054162687666	0.04704624162634041	1.7813200843565433	2.19438062598342	1.8283663259828837	25.0	3.0	1.2318845137683856	0.012536125548204772
1.3227891601489123	0.38117617959816363	1.652935844079374	2.9757250042282863	2.0341120236775376	86.0	30.0	1.800266486377551	0.0099789468099209
1.5087950127709417	0.9303794394046778	1.3851634079231858	2.8939584206941276	2.3155428473278636	77.0	53.0	2.0892541660720885	0.013986684377193009
1.7693134939751016	0.9389821657019977	1.0398801387770136	2.809193632752115	1.9788623044790112	157.0	101.0	2.7014590701347205	0.009190633486069924
2.3331862882788674	0.6604136790050985	1.324836121890026	3.6580224101688934	1.9852498008951245	114.0	45.0	2.7611131291848516	0.012966814156516373
0.7932565563955358	0.15455481919233982	2.377117788458195	3.1703743448537307	2.5316726076505347	33.0	7.0	1.3337051955301062	0.01298249393721379
0.7366085498043016	0.1431609359726651	1.862207174380103	2.5988157241844045	2.005368110352768	46.0	10.0	1.3955567135270575	0.010685350105775414
1.3339622051102389	0.525092414402722	1.8920820682895123	3.226044273399751	2.4171744826922343	62.0	28.0	1.705023438183193	0.012619533958353338
2.603836808232125	0.9688783650651966	1.9550662307358089	4.558903038967934	2.9239445958010055	123.0	58.0	2.331840715826872	0.010012042981949304
1.5345778490586075	0.9024380776329424	1.9503958383228732	3.4849736873814807	2.8528339159558156	88.0	57.0	1.7868032831623433	0.00962506678892841
1.2564933551187907	0.7558458892178197	1.6299263630106537	2.8864197181294444	2.3857722522284734	100.0	66.0	1.7708896448535927	0.008328023349406417
0.44213069950104433	0.2745374570914505	2.121132452354429	2.563263151855473	2.3956699094458793	29.0	18.0	1.2084408727094271	0.009755245922035865
0.8245677958375903	0.5016246862767619	1.2306507560249635	2.055218551862554	1.7322754423017255	58.0	38.0	1.6700258312934917	0.012980182770235285
2.440650552805484	1.0032953643332243	1.6835967667335276	4.124247319539012	2.686892131066752	93.0	48.0	2.449664552124778	0.014049828320712386
1.7353014975243668	0.5250771975830433	2.2176033841513236	3.9529048816756904	2.742680581734367	69.0	25.0	1.7825121074066481	0.01226340994059058
2.4703646066719305	1.1293031225851362	1.2757265523769281	3.7460911590488584	2.4050296749620643	159.0	93.0	2.9364373988055337	0.009835866339864618
2.3699697893878984	1.0241560659166902	1.6128304341734598	3.982800223561358	2.63698650009015	115.0	62.0	2.4694475867839483	0.011440248669400858
1.981039412730088	0.5931519132582441	1.8986388331070179	3.879678245837106	2.491790746365262	93.0	35.0	2.0433998179044015	0.011206212107040222
1.835839239174178	0.44314510633790616	1.4425085594904508	3.2783477986646288	1.885653665828357	96.0	31.0	2.2726712968848286	0.012467253031883258
1.277466274812631	0.265268563134319	1.2388059413982193	2.5162722162108504	1.5040745045325383	85.0	23.0	2.0312077397455623	0.012170688064001916
1.551842078698695	0.781988981483438	1.3377086617720162	2.8895507404707113	2.119697643255454	88.0	52.0	2.1600747778989664	0.012771048928247986
1.2227359577767354	0.39215603614733485	1.8345206337132924	3.057256591490028	2.2266766698606273	59.0	22.0	1.6665152385349677	0.012704043266247305
0.7305493936358327	-0.5262904772143973	2.392924754591421	3.123474148227254	1.866634277377024	29.0	-16.0	1.3052955978804148	0.013727734186434493
0.8698965199179018	0.14186531610301523	1.6955512199654565	2.5654477398833584	1.8374165360684718	68.0	13.0	1.5130464415788183	0.008917257767777478
2.406433863405582	1.0576794292936063	0.8253568007282795	3.2317906641338614	1.883036230021886	188.0	113.0	3.915628563649308	0.010530716136069797
0.8663727564080537	0.599452647666487	2.080680823540847	2.947053579948901	2.680133471207334	45.0	32.0	1.4163890715990182	0.011414036761705756
1.86708900519321	0.7155536904751065	1.5625475361756582	3.4296365413688683	2.2781012266507648	99.0	47.0	2.1949006106802473	0.011573016461575322
2.1074696809521134	0.9560141381939737	1.4058862868912487	3.513355967843362	2.3619004250852225	144.0	81.0	2.4990328169515283	0.009240348579158827
2.299242750414739	1.114563608279709	1.5823028519479962	3.881545602362735	2.6968664602277053	139.0	82.0	2.453099037004267	0.009381199129301538
0.19869720374310518	-0.2311959058079478	2.4383917856489554	2.6370889893920606	2.2071958798410076	9.0	-9.0	1.081486988642485	0.014127038544608301
1.1670210150636302	0.6855800512541281	1.7045281425628678	2.871549157626498	2.390108193816996	55.0	35.0	1.6846592824856144	0.013934385925360983
2.1596701461619467	0.9367502703826736	1.5147732694789675	3.6744434156409143	2.451523539861641	128.0	69.0	2.425738220812942	0.010066329661928384
0.7810056857061074	0.39083361144651096	1.552002216787442	2.3330079024935495	1.942835828233953	50.0	27.0	1.5032245941779294	0.012001236243281812
1.690376460754023	0.3692278444508803	2.029782145905652	3.720158606659675	2.3990099903565323	59.0	16.0	1.8327871363750752	0.015069642035716717
1.4492317849463374	0.5869846912670891	1.7453955675098793	3.1946273524562168	2.3323802587769684	99.0	47.0	1.830317099414849	0.008898914435677606
0.9473754544520898	0.37738947556626035	1.4364424367965407	2.3838178912486305	1.813831912362801	77.0	35.0	1.659529007347391	0.009615445353758278
1.6327059804069806	0.8350593084268318	1.7058893893856406	3.338595369792621	2.5409486978124725	92.0	54.0	1.9570995578998143	0.010645243383615508
1.1054560845404495	0.3261232657729911	2.1732122352597636	3.278668319800213	2.4993355010327547	51.0	17.0	1.5086737809610733	0.011865617741301557
0.7254939505355009	0.3526442225443456	1.7454396202138966	2.4709335707493976	2.0980838427582422	52.0	27.0	1.4156511300268264	0.009832662247191953
2.4538757589432665	0.7478888241780766	2.138030835826801	4.591906594770068	2.8859196600048778	80.0	31.0	2.147727019565798	0.013959628297814547
1.8332449975052494	0.6213653941680561	1.6699798227282925	3.503224820233542	2.2913452168963486	90.0	38.0	2.0977647589239887	0.012009583199109088
2.127095354199138	0.9972246118344466	1.0366249427060976	3.1637202969052356	2.033849554540544	150.0	90.0	3.051943057289727	0.010803543925027055
0.1596096956400772	-1.0230464946381495	3.065720599645034	3.225330295285111	2.0426741050068844	7.0	-41.0	1.05206270123199	0.012203448246480614
1.606322114734515	0.6895821737363355	1.6985967688531034	3.3049188835876184	2.388178942589439	85.0	43.0	1.94567595099048	0.011431802996768575
1.9797353739348458	1.1678058341599116	1.1159830342821404	3.095718408216986	2.283788868442052	162.0	113.0	2.7739833968070284	0.0091426034328464
2.5357057885419048	1.295421990017378	1.2227794788434974	3.758485267385402	2.5182014688608754	144.0	92.0	3.073722884963829	0.011328581140238759
0.16473790323695559	-0.29032952577162696	2.6329765522395547	2.7977144554765103	2.3426470264679278	10.0	-6.0	1.062567174438691	0.00972822776414606
1.2313458824041066	0.32971655635812236	1.8050738340010721	3.0364197164051787	2.1347903903591945	63.0	20.0	1.6821581805741113	0.012101828625747237
1.4211873276247393	0.42752443942933804	1.4463116910346725	2.867499018659412	1.8738361304640105	75.0	28.0	1.982628666029824	0.013343439122896476
2.3027057237072492	0.7729778798524736	1.3245106519104333	3.6272163756176825	2.097488531762907	104.0	47.0	2.7385331861136017	0.014110712265537449
1.4519691903624614	0.6220276255078048	2.156169413828748	3.6081386041912094	2.7781970393365527	66.0	32.0	1.6734021830799344	0.011427449573942034
1.9999503620551278	1.0903853290555143	1.8076719893104989	3.8076223513656267	2.898057318366013	132.0	83.0	2.106367954961768	0.008204255559947726
2.388868834165314	1.3796202479762072	1.4689071893601757	3.85777602352549	2.848527437336383	157.0	107.0	2.6262898374170622	0.008929654749233783
1.4978906735210051	0.7738110617275291	1.2428257079701055	2.7407163814911106	2.0166367696976346	117.0	71.0	2.205229875689886	0.009835595274192692
1.2375699467255468	1.0028869745634827	1.5917320344647716	2.8293019811903184	2.5946190090282544	94.0	79.0	1.7774989256540823	0.008923104170530305
0.7635564077456141	0.3816573741276039	1.49632932527751	2.259885733023124	1.877986699405114	50.0	27.0	1.510286335265136	0.012139226451227184
0.8303588364352452	0.5662662360475406	1.5914121317741434	2.4217709682093886	2.157678367821684	41.0	29.0	1.521774856340665	0.015143873266907044
2.3909999756504217	0.600965500298138	2.0246123357739414	4.415612311424363	2.6255778360720794	76.0	25.0	2.1809668119681898	0.014999570886445015
1.7375402328301515	0.24650410863370875	1.7215091506765605	3.459049383506712	1.9680132593102693	74.0	14.0	2.00931222593112	0.013790435083373697
1.832396592580282	0.4663807137443561	1.30731622225877	3.139712814839052	1.773696936003126	113.0	39.0	2.4016475596197244	0.011285932606426265
1.4322511978005386	0.7154111043358915	1.22515026615367	2.6574014639542085	1.9405613704895615	134.0	79.0	2.1690412493620532	0.008398928492265562
0.9246072617707994	0.44358292379540143	1.7639767508769364	2.688584012647736	2.207559674672338	63.0	33.0	1.5241606848339377	0.00980669366382673
1.8802986990299555	1.2028578977770192	1.1054287559097502	2.9857274549397057	2.3082866536867694	140.0	103.0	2.7009677819376967	0.010312780079082016
1.1643865843086567	0.440112044094471	1.6424213787227016	2.8068079630313583	2.0825334228171726	80.0	35.0	1.7089450973989337	0.009786152517308919
2.5048203857849693	1.116523631157377	1.4674525037618187	3.972272889546788	2.5839761349191956	133.0	75.0	2.706917518191461	0.01088371915319586
2.4507547280238935	1.159018229796751	1.288447039691421	3.7392017677153144	2.447465269488172	182.0	109.0	2.902099700280146	0.008492249079395236
2.7710351172241774	1.0513090578726056	1.197060055719676	3.9680951729438534	2.2483691135922816	155.0	81.0	3.314867248292086	0.011226955164647999
1.6750200050147661	0.4724510204192198	1.3338453789688718	3.008865383983638	1.8062963993880916	111.0	41.0	2.255782740207594	0.010669346591293333
0.7195839945335238	0.14461732686520046	1.8193982100454715	2.5389822045789954	1.964015536910672	62.0	14.0	1.3955065969398417	0.007881785974304585
0.7933731617956474	0.22477964225830682	2.2093457234605127	3.00271888525616	2.4341253657188195	58.0	18.0	1.359098693052431	0.007765793393679138
1.6344224157525489	0.8627654913148961	1.1561895728907168	2.7906119886432657	2.018955064205613	148.0	93.0	2.413628399766787	0.008647643381317521
2.7534250820453394	1.176543097279643	1.6665762786565825	4.420001360701922	2.8431193759362254	85.0	46.0	2.6521446496675565	0.016751898370330254
1.8588502494387038	0.6166064953021917	1.8828899961605612	3.741740245599265	2.499496491462753	81.0	33.0	1.987232527247541	0.012384508663255732
1.8174944935394217	0.8255373827466275	1.2061143369113907	3.0236088304508124	2.031651719658018	142.0	80.0	2.5069006626632504	0.00940358035254581
1.95466745074708	0.9129056473092916	1.5573078521753316	3.5119753029224117	2.470213499484623	105.0	59.0	2.255158026729715	0.011281043573640471
2.489596922691587	0.82579461198411	1.4953605847395515	3.9849575074311385	2.3211551967236614	108.0	48.0	2.6648806636328475	0.013215616158102078
0.2296137300597243	-0.10231465416694752	1.8814669521665834	2.1110806822263077	1.779152297999636	16.0	-14.0	1.1220397359599195	0.011074917900738139
0.2438458314869818	0.06394983916665486	2.1704785415105463	2.414324372997528	2.234428380677201	12.0	3.0	1.112346575570048	0.013964214623861387
0.19246184084454288	0.07401373946370415	1.3950260324780928	1.5874878733226356	1.469039771941797	26.0	10.0	1.1379629027443008	0.007458141079094693
1.2573352085565963	0.991395929086984	1.753188493589004	3.0105237021456004	2.744584422675988	77.0	63.0	1.7171705798631316	0.010263596849199976
0.4516516094635574	-0.036625862974805745	2.161701105391442	2.6133527148549995	2.1250752424166364	22.0	-8.0	1.208933422080002	0.013034990248765211
0.9849244864693705	0.1695764284335879	1.9099329312803484	2.894857417749719	2.0795093597139362	45.0	9.0	1.5156853784436888	0.01363568895799247
3.4042614088378764	1.4958193032353584	1.1928557877142738	4.5971171965521505	2.688675090949632	167.0	100.0	3.853875081883162	0.011724757887920479
0.8834695674933615	0.30808406865277593	2.3245802535777935	3.208049821071155	2.6326643222305695	45.0	17.0	1.3800555244903252	0.010561961656128407
1.242594113415853	0.5767459905231649	1.9196850099206457	3.1622791233364986	2.4964310004438106	58.0	30.0	1.6472906268446708	0.012633247511259244
1.4980764109968874	0.6811720682116742	2.0463438947982926	3.54442030579518	2.727515963009967	66.0	34.0	1.7320746111173813	0.012192324264012943
0.7289757416643683	0.44428732196666365	1.7336187122704212	2.4625944539347895	2.177906034237085	41.0	26.0	1.4204936970884852	0.012659810752998754
1.3013513675908133	0.7224811467232328	1.6348793345486365	2.93623070213945	2.3573604812718694	65.0	40.0	1.7959923035849585	0.013199705744870349
2.6961137884143893	0.7800802190178118	1.6060387140141383	4.302152502428528	2.38611893303195	113.0	45.0	2.678735241490981	0.012692428539161941
1.9836734955099278	0.5591849664634978	1.6136225667403012	3.597296062250229	2.172807533203799	98.0	36.0	2.2293292969477805	0.011923811696711398
2.581109421563178	1.011540190004822	1.3491198043623973	3.9302292259255753	2.3606599943672193	173.0	90.0	2.913180292229886	0.008968575525637132
1.1315795820027776	0.5403618586771055	1.8991779039377052	3.030757485940483	2.4395397626148108	57.0	30.0	1.59582600432355	0.012041131439160364
0.7118996039314491	0.24670965246977516	2.5576874489945594	3.2695870529260085	2.8043971014643345	25.0	9.0	1.2783372159922435	0.014761185786340635
1.0511419263455477	0.547868493978581	1.4404836325931218	2.4916255589386695	1.9883521265717028	69.0	40.0	1.729714592073017	0.011625500126927391
1.6641452279804747	0.5850129128097827	0.9808254690258178	2.6449706970062925	1.5658383818356005	124.0	58.0	2.696678237396658	0.011635637334703719
2.5421435317102916	0.8105328455172209	1.1799088171832666	3.722052348893558	1.9904416627004875	146.0	66.0	3.1545254130560827	0.011430503264000452
0.41922739717929547	0.11768037361779671	2.048898746936468	2.4681261441157636	2.166579120554265	31.0	9.0	1.2046110857386818	0.008952248028707454
1.5885459176661252	0.5665592938516522	2.0268021228468456	3.6153480405129708	2.5933614166984977	55.0	23.0	1.7837696140927928	0.015461653582787597
0.9154255401088112	0.2626281621787043	1.7056536461024436	2.621079186211255	1.968281808281148	67.0	22.0	1.5367007201026026	0.009391457887102038
0.06855289243846707	0.045476855769766455	2.2896494159229777	2.3582023083614447	2.335126271692744	4.0	2.0	1.0299403445618038	0.014186925706622545
0.767416755848281	0.4267312158914851	1.5856208660175677	2.3530376218658486	2.012352081909053	54.0	32.0	1.4839850258629093	0.010744840274175185
1.2018829100566153	0.5421055929994876	1.8587595721261927	3.060642482182808	2.4008651651256803	77.0	39.0	1.6466048261862123	0.009467031049140356
1.1333006740894613	0.618462150169445	1.5462438403203533	2.6795445144098147	2.1647059904897983	68.0	41.0	1.7329378746981214	0.01183910351106874
2.151425143862049	0.6476515490837544	1.7082743694559193	3.859699513317968	2.3559259185396737	72.0	28.0	2.2594142851579937	0.016562659533541038
1.1686503519131153	0.6430902586370923	1.5075920019608662	2.6762423538739815	2.1506822605979585	85.0	52.0	1.7751768053910457	0.009856699076147276
1.9989884523923163	0.4673865245079174	1.9131884725350061	3.9121769249273224	2.3805749970429235	73.0	22.0	2.0448465904373885	0.014333230730504243
1.9276988108738633	0.8655254325103947	1.3596819279098569	3.28738073878372	2.2252073604202516	139.0	77.0	2.4177571763693138	0.009229488094641202
0.9182555090000031	0.4970272058710894	1.6101996193824701	2.528455128382473	2.1072268252535595	53.0	31.0	1.5702743299319402	0.012519550436950386
2.0797872371490564	0.9291705704007194	1.752637639245208	3.8324248763942643	2.6818082096459275	104.0	56.0	2.186661287295381	0.010958541407524397
2.9633782488699367	1.2140469463909396	1.3985172540120416	4.361895502881978	2.612564200402981	163.0	89.0	3.1189429307136893	0.010129982438537584
1.0182993197895214	0.49937720995334667	1.6272947494046717	2.645594069194193	2.1266719593580183	70.0	38.0	1.625762063180045	0.010161103313590608
1.1362809285189674	0.6749292869806458	1.4173173771775371	2.5535983056965046	2.092246664158183	66.0	43.0	1.801712408819661	0.013067211462589545
0.022182181514933674	-0.3478355853309387	2.887806804799517	2.909988986314451	2.5399712194685784	2.0	-14.0	1.0076813246225707	0.011039464158940455
2.0134749397160485	0.7735843529672766	1.521979231218862	3.5354541709349108	2.2955635841861386	122.0	59.0	2.3229319417871275	0.010049147818965534
2.9773367843543896	1.0719283083460298	1.2014254622944476	4.178762246648837	2.2733537706404774	130.0	66.0	3.478170205139783	0.013940531263713956
2.0220381561694185	0.9306644144085965	1.5312372227050504	3.553275378874469	2.461901637113647	157.0	88.0	2.320525733169763	0.007784946770363654
1.0705136608004338	0.4345779830382899	1.331813885190375	2.4023275459908087	1.7663918682286648	95.0	45.0	1.8038012463336122	0.009053621090818247
1.9911513027662826	0.9232829708397077	1.623976015127711	3.6151273178939936	2.5472589859674186	97.0	54.0	2.22609649663434	0.012026209706797561
2.3927327945130874	0.9552394773060948	1.7813952934944273	4.174128088007515	2.736634770800522	120.0	60.0	2.343179025593722	0.010323253650826193
1.973737156566706	0.9928521899628693	1.291913300962573	3.265650457529279	2.2847654909254422	136.0	83.0	2.527762857690313	0.009910082394761259
1.272462590362197	0.5825571923021677	1.7641746907696267	3.036637281131824	2.3467318830717945	60.0	31.0	1.7212792457685022	0.013279341813417195
3.0704596055776783	0.943598570418948	1.403543995407743	4.474003600985421	2.347142565826691	125.0	55.0	3.1876475661781303	0.013487839761162967
1.687152877093706	0.4636985542551526	1.6138492450010913	3.3010021220947974	2.077547799256244	86.0	30.0	2.045421610673781	0.01214586174147815
2.5986521462790657	1.0949199082458174	1.3529749735180177	3.951627119797083	2.447894881763835	142.0	78.0	2.9206949109502203	0.010966749400305285
2.7446049664166816	1.258776206364703	1.1696515091966233	3.914256475613305	2.4284277155613263	168.0	101.0	3.3465151327867027	0.010435087054600075
3.196107207964884	1.2545290596993752	1.1321337294872553	4.328240937452139	2.3866627891866306	197.0	109.0	3.8230827549077655	0.009871104230920523
[truncated: 3,216 more rows]
