# Supplementary material for: Initiation of chromosome replication controls both division and replication cycles in E. coli through a double-adder mechanism
Source: eLife journal article supplement (doi:10.7554/elife.48063), 2019-11-11
Supplement: supp [file elife-48063-supp-v1.zip › elife_poa_e48063_Figure_7_source_data_5.csv]

dLambda_if	dLambda_ib	Lambda_b	Lambda_f	Lambda_i	T_ib	T_if	R_if	alpha
0.8033819654616544	0.572	1.5654	1.79096292682386	0.9875809613622056	57.0	70.0	1.8134846629217325	0.012268064916271488
1.088288191471242	0.7685	1.6455	1.978377296439319	0.8900891049680771	50.0	66.0	2.222673309219163	0.017459029017641105
1.3407900770282544	1.0111	2.0156	2.3521263779947525	1.0113363009664982	106.0	124.0	2.325760852989168	0.009820183539644879
0.6243736047432338	0.9177500000000001	2.0156	1.7961486563741624	1.1717750516309287	57.0	51.0	1.5328442552810821	0.012082570967445066
1.0795336362634003	0.6761	1.3662	1.8653069010660361	0.785773264802636	36.0	59.0	2.373848773710249	0.0211394581502619
0.8376490396390316	0.8102499999999999	1.6914	1.713216347704839	0.8755673080658074	43.0	46.0	1.9566929143225549	0.021052551206103956
0.9251663852436736	0.6266	1.8203	2.086460059189001	1.1612936739453275	45.0	58.0	1.7966687548555693	0.014574559466180272
1.154260439600732	0.6532	1.8857	2.3371494457449202	1.1828890061441881	48.0	72.0	1.9757977575285992	0.01364493444933656
1.1436922696470153	0.78705	1.96	2.2693596777590987	1.1256674081120834	58.0	74.0	2.016012599640921	0.013668981829685055
1.0650883481282722	0.8424500000000001	2.0801	2.2751002782891416	1.2100119301608694	50.0	57.0	1.8802296254935853	0.015980857257451804
0.9291467240519773	0.92335	1.8896	1.8820084699881319	0.9528617459361546	47.0	45.0	1.9751117914164158	0.021820762493445566
0.9354459724771629	0.8807500000000001	1.9541	1.9791312502084426	1.0436852777312797	45.0	45.0	1.896291240699109	0.020515123481441057
1.0842573024103803	0.68815	1.71	2.096036554140093	1.0117792517297128	42.0	56.0	2.0716342527846474	0.018763737813674405
0.9768430036718048	0.8561000000000001	1.9512	2.030790718230379	1.053947714558574	54.0	57.0	1.9268419962188892	0.0166006714638758
1.3095708131660728	0.8789499999999999	1.9668	2.4199117621312123	1.1103409489651395	51.0	68.0	2.1794312498216155	0.01652870139090668
0.849068311518214	0.9588999999999999	2.4082	2.0238480530344707	1.1747797415162566	53.0	52.0	1.72274681075309	0.015090590127698556
1.2810219387712227	0.7903999999999998	2.0898	2.610165720250142	1.3291437814789193	49.0	75.0	1.9637948554714284	0.012981923050819324
1.4721101617550207	1.42855	2.3438	2.406743133655549	0.9346329719005281	155.0	163.0	2.5750676533073302	0.008371842551600853
1.3700347064479326	0.6514	1.5615	2.3486728049011725	0.9786380984532398	44.0	82.0	2.399940088796159	0.015402419407142228
1.3462641934207857	0.6520999999999999	1.7656	2.5050072690400467	1.158743075619261	42.0	79.0	2.161831489436352	0.014079165470635866
0.7500400301532537	0.64465	1.6953	1.825093649391333	1.0750536192380793	39.0	45.0	1.6976768569783787	0.016968041696059637
0.9643127357797509	0.8514999999999999	1.7744	1.879159762930909	0.9148470271511581	53.0	58.0	2.0540699233429542	0.017904918858616788
1.1550731684356599	0.7787000000000001	1.6455	2.0821539637321376	0.9270807952964776	51.0	72.0	2.24592503080195	0.016212635711668394
0.8184917672089194	0.74325	1.8486	1.8897877574034792	1.0712959901945598	52.0	54.0	1.764020191152094	0.01516420507818751
1.1017047515233083	0.9656999999999999	1.8848	2.0377524818598207	0.9360477303365126	45.0	50.0	2.1769749723416787	0.022446496432689606
0.9917605871846167	0.8089	1.8486	2.0995499766042696	1.1077893894196529	50.0	61.0	1.895260955427799	0.015121254170968502
0.9709869099281916	0.69045	1.8242	2.058320460382746	1.0873335504545543	45.0	56.0	1.8929982060447554	0.016440590068393157
0.7974653429054628	0.7470999999999999	1.8242	1.8533032642958818	1.055837921390419	43.0	46.0	1.7552914389126044	0.01764588233799884
0.904363830936713	0.5680999999999999	1.3652	1.7541588159208588	0.8497949849841457	45.0	70.0	2.0642141303688506	0.014937037655375464
1.0226922060736396	0.8210500000000001	1.6367	1.9464554612970475	0.923763255223408	52.0	69.0	2.107093403305272	0.015583395179791754
0.8265905447114958	0.6089999999999999	1.501	1.75238608301009	0.9257955382985941	79.0	95.0	1.8928435172960383	0.009690054182719227
0.814984822780239	0.9242	1.8857	1.7627983813557053	0.9478135585754663	59.0	50.0	1.859857738272003	0.017903845457432035
1.0050727839998923	0.7321000000000001	1.6914	1.9687213780763049	0.9636485940764127	50.0	54.0	2.0429868213144458	0.019086664772499793
1.1055747915570486	0.8795499999999999	1.8242	2.0161045103489608	0.910529718791912	38.0	45.0	2.2142105510009293	0.02548427590298609
1.2414468079642638	0.7808	1.626	2.185448752051215	0.9440019440869513	49.0	73.0	2.315089249275863	0.01658997002825354
0.874894843242175	0.69705	1.8389	1.964584358046644	1.089689514804469	39.0	46.0	1.8028845201829475	0.018484934588268713
1.0308286002812648	0.7555	1.8242	2.181927601886845	1.1510990016055804	45.0	57.0	1.8955168919818715	0.016185812512384917
1.235062328189289	0.8922000000000001	1.8213	2.2590792272339906	1.0240168990447016	58.0	82.0	2.2060956507079816	0.01392067492537256
0.6705668436344028	0.7319	1.7852	1.7719902523957314	1.1014234087613286	70.0	60.0	1.608818405619805	0.011433358199045037
0.6926970178795817	0.9431	2.0156	1.764090879792549	1.0713938619129673	72.0	61.0	1.6465381616455925	0.011794031959267275
1.1018482575366944	0.8628	1.8955	2.1383350606532407	1.0364868031165464	47.0	52.0	2.0630605756133282	0.020092041966887866
1.4767775780070422	0.6548	1.6914	2.5032568939492927	1.0264793159422505	55.0	95.0	2.438682256009653	0.013537913651183555
0.6967451205702546	0.6270499999999999	1.9512	1.9581289653671587	1.2613838447969041	47.0	44.0	1.5523656604960228	0.014419736933685185
0.5957360300192591	1.08125	2.3203	1.7316239968380185	1.1358879668187594	66.0	49.0	1.5244672427402464	0.012414390826849529
0.9838024474392357	0.7904	1.71	1.9303102723494818	0.9465078249102461	80.0	93.0	2.039402339365262	0.011055337877487638
0.9951343600902393	0.7126499999999999	1.6709	1.9499410064903266	0.9548066464000874	50.0	65.0	2.04223652384721	0.015848460972147087
0.7280794781802132	0.6264500000000001	1.4355	1.5784929198027984	0.8504134416225851	40.0	48.0	1.8561476601205182	0.018589822587485514
1.1164465748443257	0.72705	1.626	1.9905629770787754	0.8741164022344495	46.0	61.0	2.2772287214728184	0.019463593457385155
0.9291865502231273	0.6217000000000001	1.6875	1.95475336703354	1.0255668168104126	50.0	65.0	1.9060224404617196	0.014316386228417688
1.202140486433255	0.68885	1.6367	2.2301943549764593	1.0280538685432044	54.0	100.0	2.1693360856048707	0.011172535806608177
0.7462972535488939	1.2361000000000002	2.3418	1.8210437741325467	1.0747465205836528	127.0	89.0	1.6943937377379077	0.008547968117267107
0.904050230424023	0.8733500000000001	1.7012	1.7591433210615326	0.8550930906375096	62.0	65.0	2.0572535789641497	0.016011071272894008
1.0375997197084872	0.83845	1.6914	1.9186821092753765	0.8810823895668893	49.0	58.0	2.177642104750881	0.01935804942689406
1.4482580976375612	0.9847500000000001	1.8242	2.3631968427360968	0.9149387450985355	64.0	87.0	2.582901702869288	0.015735548736278193
0.7733993917900934	0.8431	2.002	1.8830435274569195	1.109644135666826	74.0	70.0	1.6969796594521083	0.010899561033916118
1.3185840740768815	0.6356	1.3711	2.17214512486066	0.8535610507837786	44.0	88.0	2.5448034711355416	0.015313116418645741
1.1306886800138058	0.6478999999999999	1.626	2.127772355550213	0.9970836755364073	38.0	65.0	2.133995779647603	0.01682395881510298
0.8393480108590188	0.5243500000000001	1.5723	1.8795356763407072	1.0401876654816884	46.0	65.0	1.8069197883348624	0.01313126868305271
1.0541426821737356	0.8631	1.6367	1.9056508546986273	0.8515081725248916	48.0	57.0	2.2379713033733926	0.020389325216163337
1.238812845645448	0.91035	2.0195	2.3267886682454364	1.0879758225999885	64.0	74.0	2.138640050552775	0.014820184950614367
1.059617813884529	0.88435	1.7559	1.9502980608060156	0.8906802469214866	67.0	78.0	2.18967252001709	0.014496347710133826
0.8648852915665338	0.84775	1.8242	1.8407799458526832	0.9758946542861494	66.0	66.0	1.886248620963277	0.013871512818147382
0.958018619572697	0.75675	2.0801	2.0993057689037586	1.1412871493310617	85.0	85.0	1.8394194398265298	0.010344123443173868
0.9869933929984478	0.89625	1.96	1.927611005672397	0.9406176126739492	82.0	82.0	2.0493035423743167	0.012623581607778427
0.8776533084418134	0.64	1.501	1.7449958206164071	0.8673425121745937	36.0	45.0	2.011887802249389	0.022412218934137675
1.1338394339335596	0.8431000000000001	1.6367	2.003184448089596	0.8693450141560366	50.0	63.0	2.3042456279964925	0.019115785926932045
1.1201972613881443	0.6443	1.6953	2.1949159601503907	1.0747186987622463	46.0	65.0	2.0423167129019673	0.015849332460748853
0.9510726974882737	0.7689499999999998	1.8389	2.0391353241042864	1.0880626266160127	40.0	47.0	1.8740973857784347	0.019280764325321616
1.061039532732984	0.8082500000000001	1.7549	2.031244566232789	0.9702050334998051	42.0	53.0	2.0936240238885517	0.02011325253228402
0.8797701209027444	0.81705	1.6904	1.8143130582798563	0.9345429373771119	51.0	57.0	1.9413907972724154	0.016791062426451286
1.0324478494366067	0.77885	1.7559	2.0036439113950992	0.9711960619584925	48.0	57.0	2.0630684059350437	0.018329678210518122
1.1470572584642573	0.80995	1.8896	2.22357649722937	1.0765192387651128	54.0	68.0	2.065524160794432	0.015389822584513244
1.2966136034707012	0.70565	1.4951	2.167919170886437	0.8713055674157356	57.0	93.0	2.4881273022464616	0.014140433346587988
0.8882251512162151	0.78085	1.8848	1.9846022010023179	1.0963770497861027	55.0	59.0	1.8101456988629077	0.014510268215147762
0.9831978422202197	0.7506	1.6953	1.9466254168886705	0.9634275746684509	58.0	59.0	2.0205207615721115	0.01719876569159481
0.9972491420561527	0.75335	1.6904	1.9028253262117116	0.905576184155559	65.0	78.0	2.1012316351783014	0.013733784747725757
1.162740920326605	0.68035	1.626	2.1279460636085523	0.9652051432819472	64.0	93.0	2.204656780394876	0.012264022316034524
1.2126724970743812	0.84565	1.7549	2.146133664931067	0.9334611678566856	61.0	77.0	2.2991140272699195	0.015598415844044448
0.7599109134721251	1.0387500000000003	2.0801	1.8354959081661257	1.0755849946940006	52.0	42.0	1.706509403925179	0.01835829439531206
0.8844554882703313	0.8145499999999999	1.626	1.7510454915541644	0.8665900032838332	71.0	82.0	2.0206158447694977	0.01237554958101681
1.4252833204041742	1.4071499999999997	1.5615	2.0961679781906466	0.6708846577864725	82.0	118.0	3.1244834024179005	0.013928963359096309
0.9910034470797586	1.0924	2.084	1.9522346575556213	0.9612312104758627	104.0	101.0	2.0309730232221206	0.010120505711836078
0.6944866967138754	0.8828499999999999	1.96	1.7323882766225416	1.0379015799086662	61.0	47.0	1.669125772768348	0.0157253759456897
1.2185610484895866	0.84745	2.0156	2.339167893987732	1.1206068454981455	46.0	58.0	2.087411747826596	0.01830543455542333
0.8742240838047906	0.6806999999999999	2.0156	2.140071046136983	1.2658469623321924	51.0	53.0	1.6906238351231044	0.014293503677193882
0.9996973933115478	0.9014	2.1484	2.0351097268406675	1.0354123335291197	50.0	50.0	1.965506553224221	0.01949802347761434
1.1169429823940646	0.77325	1.8213	2.1639880089323085	1.0470450265382438	50.0	64.0	2.066757354348856	0.016365140945116922
1.1127305383679216	0.7416499999999999	1.9541	2.286255098187709	1.1735245598197872	47.0	58.0	1.9481953565068961	0.016588592272773622
1.1771455326294105	0.9120499999999998	2.2109	2.4101193830453123	1.2329738504159018	38.0	44.0	1.954720598682884	0.021976418368109703
0.5647768415875728	0.63845	1.5723	1.5111228528883782	0.9463460113008054	52.0	45.0	1.5967974026870526	0.01500402842524522
0.9573980142137313	0.8452500000000001	1.8857	1.871327377802364	0.9139293635886327	55.0	55.0	2.0475623744644933	0.01879831638278319
1.2022537414415182	0.7151999999999998	1.8203	2.311821569132843	1.109567827691325	39.0	60.0	2.083533346440879	0.017650536503433352
0.9470223856901796	0.8102	1.8213	1.9230548807806378	0.9760324950904582	66.0	72.0	1.9702775168386275	0.013588872916256631
1.0903195529542205	0.6091000000000001	1.6914	2.195485233610086	1.1051656806558656	41.0	68.0	1.98656660448157	0.014562899472062832
0.7037677147361077	0.7477	1.6953	1.6471283791086768	0.9433606643725692	47.0	42.0	1.7460218994865393	0.01914456319259655
1.2218708381289787	0.7063500000000001	1.626	2.156507424038175	0.9346365859091964	55.0	80.0	2.3073218580892236	0.015077740821181749
1.0752977669394537	0.84535	2.084	2.2453830000136015	1.1700852330741478	57.0	61.0	1.9189909730886352	0.015415539756204131
0.9660246093524112	0.6839	1.8301	2.1184395167187984	1.1524149073663872	38.0	49.0	1.8382611186105413	0.01792534104092824
1.1038870176819475	0.7141	1.8857	2.228827346572764	1.1249403288908166	53.0	68.0	1.9812849529275678	0.014506417453617205
0.7920252835707124	0.7484	1.9541	1.8972812192948376	1.1052559357241252	55.0	51.0	1.7165989866879159	0.015285353958218569
1.0583450028649686	0.7447999999999999	1.6953	1.9878691465232998	0.9295241436583312	54.0	69.0	2.1385879646973307	0.015893602167646157
0.9561344630417302	0.7162000000000001	1.6914	1.929323861677324	0.9731893986355938	41.0	50.0	1.9824752143644655	0.019746056578741438
1.123824761828185	0.7438	1.9512	2.24419111944048	1.120366357612295	47.0	56.0	2.0030868511825544	0.017896874568670253
1.194292391685255	0.8513	1.9766	2.3274685027826854	1.1331761110974303	57.0	71.0	2.053933611897833	0.014625204943895164
0.9122568378853053	0.7940499999999999	2.0195	2.101148576094161	1.1888917382088557	56.0	58.0	1.7673169966339246	0.014164841958310427
1.1720137532321577	0.65645	1.6953	2.270268711330198	1.0982549580980403	38.0	67.0	2.0671599928507067	0.015636567969538787
1.0917279115578995	0.6778499999999998	1.6953	2.13662705321895	1.0448991416610505	51.0	75.0	2.0448165454729024	0.01375961886531582
0.9027858953967971	0.72035	1.8389	1.9796955743090678	1.0769096789122707	57.0	68.0	1.838311618025992	0.012917372693584199
0.9785011694213641	0.7576	1.96	2.1029425050848083	1.1244413356634442	69.0	75.0	1.8702109557756765	0.01204268016254683
1.1458758714503017	0.8382000000000001	2.084	2.3170042232304024	1.1711283517801008	50.0	58.0	1.978437478444258	0.01697174956431141
1.0656947474593712	0.9108999999999999	1.8389	2.0195536424434777	0.9538588949841065	48.0	55.0	2.1172456985654344	0.019676158154662945
1.1877859245935396	0.8268000000000002	1.7656	2.1592767452124377	0.9714908206188981	47.0	62.0	2.222642457740206	0.01858509499864759
0.7594627665362745	0.8654999999999999	1.7559	1.8424448185392603	1.0829820520029858	39.0	39.0	1.7012699473011956	0.019656719932112127
1.2051189644063574	0.7779500000000001	1.9541	2.356346054825436	1.1512270904190787	56.0	73.0	2.0468125484848176	0.014155876483320857
1.0267120525675366	0.7085000000000001	2.1543	2.395969516958056	1.3692574643905193	49.0	55.0	1.7498312620297047	0.014676651059021016
0.7144121664946459	0.84775	2.0801	1.9777588916277244	1.2633467251330786	67.0	60.0	1.5654917626983131	0.010776931955440555
0.8628934037008412	0.7283	1.71	1.827185474833817	0.9642920711329758	53.0	58.0	1.8948465195684974	0.0158979482147789
1.0006478110119934	0.7827500000000001	1.6904	1.932965407671375	0.9323175966593815	47.0	56.0	2.073290705439271	0.018784328882284117
0.9069334257675157	0.7285999999999999	1.9131	2.129004051336794	1.2220706255692784	64.0	80.0	1.742128488151033	0.010010637896671842
1.050251474868495	0.7593000000000001	1.9131	2.1480121278762225	1.0977606530077275	85.0	105.0	1.9567217334588707	0.009223224800447159
1.0034010528639121	0.7178499999999999	2.084	2.3401078480328743	1.3367067951689622	51.0	64.0	1.750651568833448	0.012623312087263014
1.1611338734085246	0.8134000000000001	2.1465	2.4514871553531874	1.2903532819446628	69.0	82.0	1.8998573411295592	0.011291354777181722
0.8534220598649667	0.78285	2.084	2.112811517175976	1.2593894573110094	55.0	58.0	1.677647454415852	0.012869647855327241
1.2037050749105016	0.7809999999999999	2.0156	2.3804302136155777	1.1767251387050761	56.0	71.0	2.0229279848946846	0.014316126220752902
1.032173300938919	0.7490999999999999	1.7549	2.0210924362958504	0.9889191353569317	50.0	62.0	2.0437388296327943	0.016632432989706986
1.1906793016854238	0.6784000000000001	1.6914	2.324438444414998	1.1337591427295741	42.0	89.0	2.050204807009372	0.011637843103567705
1.1028650001732676	0.83985	2.084	2.2480959763779604	1.1452309762046928	63.0	70.0	1.9630066100972692	0.013900929012101819
1.0349831330636323	0.8109	2.0801	2.238960220052299	1.2039770869886668	70.0	77.0	1.8596369019382963	0.011623648825372764
1.054788356786516	0.8148499999999999	2.0234	2.233260236619907	1.1784718798333909	63.0	71.0	1.8950475398154083	0.012989211842184871
0.8811589100408876	1.2393	2.1484	1.923402649041844	1.0422437390009565	92.0	74.0	1.8454441864870526	0.011945514938560617
0.9828873794585593	0.8807500000000001	1.96	2.0468313969437437	1.0639440174851844	63.0	66.0	1.9238149407351184	0.01430257617148051
1.2804978070305915	0.6758	1.7744	2.399113043621324	1.1186152365907327	51.0	79.0	2.144716936748723	0.013934015835904047
1.3980273895973008	0.6753	1.9033	2.678583769223734	1.2805563796264334	47.0	86.0	2.0917343522236296	0.012380228403057528
1.1549818085264474	0.7534000000000001	1.9512	2.2897011166895536	1.1347193081631062	78.0	100.0	2.017856839323676	0.010128238233420917
0.906112166071869	0.7496499999999999	1.8213	2.0074640473167693	1.1013518812449004	58.0	69.0	1.822727215072857	0.012552154598501267
0.7758046707358408	0.7790999999999999	1.8213	1.7190200804530416	0.9432154097172007	82.0	77.0	1.8225105980493324	0.011245807843729473
1.1700856839092824	0.64615	1.8213	2.3166749628160392	1.1465892789067569	52.0	78.0	2.020492433894837	0.013009063449933677
0.8756225819043575	0.68075	1.8203	2.025119647027968	1.1494970651236107	61.0	70.0	1.7617440778852251	0.011671490920716622
0.9735489651712386	1.62925	2.8711	2.08374535138383	1.1101963862125914	167.0	158.0	1.8769159918566098	0.005749139737942519
1.0317706824415385	0.72415	1.6299	1.9767186207799008	0.9449479383383623	52.0	69.0	2.0918809815658723	0.015431895234615226
1.1261296138745585	0.7806500000000001	1.8203	2.1587658789123494	1.032636265037791	58.0	73.0	2.090538510027387	0.01457362492688049
1.1452253131116037	0.7857500000000002	1.96	2.30003722633656	1.1548119132249561	55.0	69.0	1.991698561468265	0.01440578718388224
0.9475008282034292	0.9343999999999999	1.8301	1.8315588804778682	0.884058052274439	56.0	48.0	2.071763133389	0.021892897245490022
0.9299851281289401	0.86245	1.8242	1.8385521656795083	0.9085670375505682	50.0	49.0	2.023573484061356	0.02075316816318774
0.945800833335523	1.0808	2.0312	1.9284093177909325	0.9826084844554095	63.0	56.0	1.9625408779771667	0.017370048292303118
1.2824535591080168	0.7565999999999999	2.2246	2.6624707850663434	1.3800172259583265	59.0	78.0	1.9293025731743614	0.012154864352328617
1.0268809796207636	0.7886000000000002	2.3477	2.5082898677980703	1.4814088881773066	54.0	58.0	1.6931786273297007	0.013098865224483778
1.0188219595557495	0.63805	1.9248	2.302442471196952	1.2836205116412023	34.0	50.0	1.793709628598184	0.016858927222229064
1.0168054572960428	0.9762000000000002	1.9248	2.0284368466549574	1.0116313893589146	64.0	68.0	2.005114578285681	0.014760068808459252
1.2464947593706586	0.8889	1.7012	2.2102924913318525	0.963797731961194	64.0	91.0	2.293315721789691	0.013158626209407845
0.6062536448592932	0.7746999999999999	1.8242	1.6879026181453292	1.081648973286036	55.0	50.0	1.5604901958326667	0.012839985863911774
0.998230849943246	0.91445	1.9502	2.007591682176149	1.009360832232903	66.0	69.0	1.9889732373852516	0.014377157451155908
0.9490745108900456	0.8482500000000001	1.8242	1.9579574199295438	1.0088829090394982	49.0	55.0	1.9407181967168095	0.017392557195665227
1.0789746750883693	0.8775	1.8213	2.0240942620029347	0.9451195869145653	55.0	62.0	2.1416276733939954	0.01772109171343347
1.3609894359950268	0.68005	1.5654	2.3121164487309964	0.9511270127359697	49.0	91.0	2.4309229133131915	0.01408246313157532
0.8381834730815143	0.6637000000000002	1.5938	1.8547974782273944	1.01661400514588	52.0	64.0	1.8244854672853326	0.013554525927471785
1.0470401437775083	0.7994500000000001	1.71	1.9389004455793963	0.891860301801888	56.0	68.0	2.1739956825773046	0.01647572169505585
1.0333750231838923	0.80445	1.8213	2.0458698013172074	1.0124947781333151	54.0	63.0	2.020622570606313	0.016107934409535684
1.1128600975469787	0.7967	1.8242	2.1557926043829814	1.0429325068360027	54.0	66.0	2.067049008687167	0.015872312041500716
0.9725640406410843	0.9477999999999998	2.1445	2.1632636265401146	1.1906995858990304	66.0	74.0	1.816800519760621	0.011640540863404004
1.0848672483783752	0.7632000000000001	2.2988	2.5097742280096034	1.4249069796312281	34.0	39.0	1.7613600493831136	0.02094076534911315
0.8730545206177057	0.6885999999999999	1.501	1.7105780862044164	0.8375235655867107	57.0	69.0	2.042423827210288	0.014931627154258062
0.9197275495521388	0.6543999999999999	1.625	1.8348169620557953	0.9150894125036565	56.0	69.0	2.00506850695146	0.0145456743467019
0.9097498586786817	0.6812	1.626	1.8620054903333474	0.9522556316546656	71.0	84.0	1.9553630647454143	0.011517101271484182
0.8500823671523081	0.71745	1.626	1.7579543314160428	0.9078719642637347	41.0	48.0	1.9363460935173906	0.01986118408912744
1.137495645470286	0.88665	1.8389	2.0628872797434616	0.9253916342731757	73.0	75.0	2.2292045911606944	0.015420387064477688
1.240165759715816	0.9684999999999999	1.9033	2.298944464627427	1.0587787049116109	63.0	80.0	2.171317248791236	0.013982131649376856
1.1385289926300273	0.7016500000000001	2.0312	2.424019115064331	1.2854901224343036	67.0	83.0	1.8856769669097266	0.01102509097348379
0.932051832136932	0.7932999999999999	2.084	2.1342233021973542	1.2021714700604222	58.0	63.0	1.775306897018681	0.013143943565666262
1.2136307444859786	0.7424	1.7559	2.3771043670833896	1.163473622597411	49.0	85.0	2.0431098057698924	0.012126667564423443
1.088831535373254	0.8112000000000001	2.0801	2.298127686296899	1.2092961509236448	51.0	56.0	1.9003845208153674	0.016540917156045516
1.0473913502364216	1.1422500000000002	2.2832	2.1195711678797515	1.07217981764333	119.0	112.0	1.9768803077627466	0.008778799323809343
0.7848423655533272	0.7221	1.4434	1.5891064583600472	0.80426409280672	66.0	69.0	1.975851554946815	0.014238761765330683
1.011848357039545	0.72075	1.3711	1.7342631012590737	0.7224147442195288	49.0	68.0	2.4006474329821574	0.01857975794356762
0.8143527611584567	0.8632500000000001	1.7559	1.6627139164520892	0.8483611552936325	61.0	60.0	1.959912834383129	0.016179824883569727
1.4186239965231482	0.7779	1.7549	2.451684304519489	1.0330603079963407	44.0	77.0	2.373224762913041	0.016192840798520475
0.8673756330841009	0.5563	1.7559	2.140702806117316	1.2733271730332152	51.0	82.0	1.6811883477032146	0.009140016613837966
1.0958323696678574	0.8767	1.9541	2.1563451054597644	1.060512735791907	112.0	126.0	2.033304299593891	0.008125604299412895
0.7988048383892329	0.7481999999999999	1.5615	1.6655911419532636	0.8667863035640307	49.0	52.0	1.9215706744611984	0.018120885365735796
0.9884847887102576	0.6654	1.4316	1.8108726098785393	0.8223878211682817	46.0	68.0	2.2019691479696513	0.01674697434244152
0.9505091633994978	0.7646000000000001	1.6914	1.842731872502484	0.8922227091029862	67.0	76.0	2.06532724812072	0.013768031482935957
1.2313309416759826	0.82135	1.8848	2.304198255761355	1.0728673140853726	39.0	57.0	2.1477010488717343	0.019347248949103325
1.2244480538906246	0.7298	2.0527	2.4818857056458112	1.2574376517551866	57.0	78.0	1.9737644265554528	0.012576279628328383
1.30565732988808	0.8878999999999999	2.3418	2.732362162325019	1.426704832436939	66.0	89.0	1.9151558894336267	0.010533278978654909
1.1362337905826592	0.7485499999999999	1.71	2.101803924695356	0.965570134112697	62.0	85.0	2.1767491044312304	0.013202060350357706
0.877911926048655	0.6933	1.8242	1.976094732179648	1.098182806130993	64.0	71.0	1.7994223922897006	0.011937096919319578
1.054716948042208	0.651	1.7207	2.110446906851595	1.0557299588093871	51.0	76.0	1.999040464127473	0.01314878519850848
1.0581354914084278	0.75285	1.7598	2.0895314328260137	1.031395941417586	73.0	94.0	2.0259255916346635	0.010835970081781079
1.3398127489535536	0.8630500000000001	2.0957	2.549776471694084	1.2099637227405302	48.0	73.0	2.107316462281133	0.014731602526513305
0.85191301377519	0.7152000000000001	2.0195	2.110597920246721	1.2586849064715309	52.0	58.0	1.676827861679343	0.012857492992832766
1.014619148389801	0.7135	1.8896	2.1719081471044612	1.1572889987146602	53.0	64.0	1.876720637210485	0.01419084236031541
0.8442606404791453	0.5987	1.6953	1.9138728888139	1.0696122483347548	52.0	61.0	1.7893146715490102	0.013760772527952679
1.1192156989973214	0.8519	1.8955	2.133714017330886	1.0144983183335645	57.0	66.0	2.1032208518943314	0.01625152046066954
1.1487412237611943	0.8798999999999999	2.0156	2.249460431471013	1.100719207709819	61.0	71.0	2.043627853239057	0.01452299301300377
0.9553279072234839	0.8202500000000001	1.8955	2.0096958567872734	1.0543679495637894	60.0	66.0	1.9060669073056706	0.014099981242887891
1.0955884393824808	0.7116	1.6914	2.1040423185130703	1.0084538791305895	48.0	68.0	2.086404110346635	0.015603214954175321
0.6566147855281822	0.5530999999999999	1.4961	1.638749734573842	0.9821349490456598	54.0	66.0	1.6685586193284483	0.011190945026724256
0.9579546426192365	0.7784499999999999	1.4961	1.7391373951864715	0.781182752567235	68.0	81.0	2.2262874973507394	0.014254813714048143
1.0854965941791672	0.8426	1.6914	1.938999752302766	0.8535031581235987	53.0	64.0	2.271813213398764	0.018497565976984213
0.9553334816667354	0.9430000000000003	2.0234	2.0309720923829273	1.075638610716192	70.0	70.0	1.8881546944755414	0.013099670971271788
1.0768836768808652	0.7330500000000002	1.7344	2.073304966278846	0.996421289397981	43.0	58.0	2.0807513732785634	0.018225941194968783
1.2546798727003539	0.77505	1.7549	2.255035594768464	1.0003557220681103	56.0	83.0	2.2542337140896844	0.014128157816564176
1.2001765955878039	0.8821999999999999	2.084	2.3627813646335225	1.1626047690457186	71.0	86.0	2.032316938260046	0.01189680705621876
0.5563332224081763	0.8495500000000002	2.0898	1.727226500827583	1.1708932784194066	69.0	50.0	1.4751357213008967	0.01121695394291169
1.019377065119059	0.73935	1.4531	1.8071123035197048	0.7877352384006459	48.0	67.0	2.2940605109766574	0.017879155912894483
1.1954463326615832	0.6178999999999999	1.3711	1.9946839713522484	0.7992376386906652	51.0	85.0	2.495733277301603	0.015523103052828143
1.0554802054278027	0.58965	1.3711	1.929881516726617	0.8744013112988143	46.0	76.0	2.207089001113251	0.015028221153039768
1.0201911001302235	0.78305	2.0156	2.2405889826236796	1.220397882493456	54.0	62.0	1.8359495823164	0.014137523240629456
0.8690010585129742	0.84385	1.8857	1.9466626173074075	1.0776615587944334	51.0	54.0	1.806376595157681	0.015798124049034787
1.1651973803022964	0.7777000000000001	1.6914	2.154084004616889	0.9888866243145928	44.0	68.0	2.178292184010383	0.016517610031342375
1.2032763529319102	0.6943999999999999	1.6299	2.1786601930004017	0.9753838400684915	56.0	93.0	2.2336439291914205	0.01246665828492132
1.2687920048064738	0.72635	1.8389	2.3229947756248683	1.0542027708183945	64.0	92.0	2.203555938125158	0.012389494787558101
1.2186239472273568	0.9895999999999998	2.1543	2.3955641847032316	1.1769402374758748	49.0	58.0	2.0354170147507906	0.01767800694966301
1.0861871776136234	0.7457500000000001	1.8203	2.1529169754446267	1.0667297978310033	62.0	77.0	2.018240213990631	0.013157115537673751
1.0636325169411558	0.8093	1.8955	2.13042364956222	1.0667911326210642	53.0	58.0	1.9970391432930759	0.017204527773097437
1.2162543624647872	0.8785499999999999	1.9512	2.260105710899016	1.0438513484342287	62.0	70.0	2.1651605032547616	0.015921056797676643
1.3318870531678182	0.81395	1.9668	2.5000857512845163	1.168198698116698	48.0	67.0	2.140120302577814	0.016383461151030187
0.9721744982239044	0.7121500000000001	1.96	2.262875721299538	1.2907012230756336	42.0	53.0	1.7532142070085697	0.015283061788073708
1.143461594919992	0.7562499999999999	2.0234	2.3557133256280816	1.2122517307080896	48.0	62.0	1.9432542482344681	0.0154592688739089
1.1730195366300773	0.90655	2.0801	2.3361977452106477	1.1631782085805704	59.0	69.0	2.008460722507445	0.014581018091161248
1.0772221879569406	0.7928	2.0156	2.2745874480638544	1.1973652601069138	47.0	58.0	1.8996604660642604	0.015961061774575697
1.0029832012967685	0.6318999999999999	1.8896	2.251192830293575	1.2482096289968063	43.0	61.0	1.8035374651795246	0.013948022832416999
1.376253956791573	0.8753499999999999	2.0195	2.527202954802698	1.1509489980111252	69.0	98.0	2.195755814697073	0.011578751267723234
1.0405866736243221	0.74925	2.0801	2.3223113504625683	1.2817246768382462	62.0	78.0	1.8118644295678519	0.010993269379696908
0.83999299822166	0.7572	1.7549	1.8127448794364862	0.9727518812148263	60.0	63.0	1.863522358006268	0.014254478225579797
1.0925772095567974	0.7215500000000001	1.8857	2.2545421354678554	1.161964925911058	50.0	63.0	1.9402841559095632	0.015178856373600174
1.2624021517557638	0.7436499999999999	1.8486	2.386317748860671	1.123915597104907	41.0	64.0	2.123217931139655	0.016972694684612443
1.0851542556827312	0.6305	1.4355	1.9722982927644186	0.8871440370816874	37.0	62.0	2.2231996274837287	0.018590927385728005
1.0209243691191445	0.81615	1.8242	2.0298355500190595	1.008911180899915	58.0	61.0	2.011907082057029	0.01653383077435045
1.0385119931416749	0.9177500000000001	1.8213	1.9684436527584384	0.9299316596167636	67.0	70.0	2.1167616269454235	0.015455125907401307
1.1567856512551875	0.78065	1.8213	2.1879309585513154	1.0311453072961279	56.0	70.0	2.121845430580986	0.015504565207431093
1.3985710884774258	0.71645	1.8857	2.5486433928856984	1.1500723044082726	42.0	68.0	2.216072313989866	0.01688242587655411
1.243280592146895	0.8510500000000001	1.5615	2.014916656513023	0.7716360643661279	55.0	74.0	2.6112266514761813	0.01871253631566695
1.1092374562029268	0.5568500000000001	1.5723	2.1247670566199544	1.0155296004170276	33.0	57.0	2.092274864019146	0.018685480564426576
1.3527346074991704	0.6442999999999999	1.5654	2.3401251455761063	0.9873905380769358	39.0	74.0	2.3700096925516294	0.01682287782808959
1.1579347596807392	0.8530500000000001	1.7012	2.081388218857182	0.9234534591764428	57.0	74.0	2.2539178322136695	0.015843715165478982
1.0980657669673164	0.6553	1.7012	2.1536875671030473	1.055621800135731	44.0	64.0	2.0402075504940576	0.01607368633056665
0.9060330694796608	0.78795	1.6367	1.8002382855796417	0.8942052160999809	39.0	44.0	2.0132272247653242	0.022943409376548447
0.9374108453314122	0.864	1.7559	1.8661725551783679	0.9287617098469557	87.0	96.0	2.009312545287727	0.01048647906651798
1.1070387389124754	0.8362499999999999	1.8486	2.123359251728745	1.0163205128162698	48.0	60.0	2.0892614337231286	0.017716550519953692
1.055973592000019	0.8395999999999999	1.8896	2.118902730118124	1.062929138118105	61.0	71.0	1.993456246640862	0.014017914657770419
0.7854768660627756	0.6533499999999999	1.6914	1.8136817968979786	1.028204930835203	49.0	57.0	1.7639302657542584	0.014364798724792368
0.9676807363593086	0.8003999999999999	1.7549	1.9079663032681264	0.9402855669088178	60.0	67.0	2.029134946248885	0.015236788264839353
1.1892557713635763	0.84145	1.8213	2.1707162177491415	0.9814604463855651	56.0	70.0	2.211720529078132	0.016359558564332338
0.9697465336935533	0.9316499999999999	2.0801	2.086409266067208	1.1166627323736547	70.0	70.0	1.8684327913695067	0.012883266715138444
1.1328471204041757	0.71265	1.8203	2.22822192009545	1.0953747996912744	58.0	74.0	2.034209588100313	0.013844166624272156
1.0366861487212609	0.7105999999999999	1.8203	2.0941009080054975	1.0574147592842367	60.0	71.0	1.9803968968836723	0.013884360476507013
1.0270478473455429	1.588	2.7363	2.118025642833673	1.09097779548813	201.0	163.0	1.9414012380389618	0.005871768816418081
1.1159607375564193	0.8194000000000001	1.8301	2.115736454125254	0.9997757165688347	73.0	88.0	2.1162110852085148	0.012289585668087872
0.9031567133265035	0.7350000000000001	1.8848	2.0148950033632533	1.1117382900367498	48.0	55.0	1.8123824837378306	0.015597953685704146
0.8256465339888521	0.8248500000000001	1.8896	1.8383612208369335	1.0127146868480814	59.0	58.0	1.8152804977664043	0.014830905020338545
0.8605377080857537	0.7700499999999999	1.7549	1.866591750747606	1.0060540426618523	47.0	53.0	1.8553593262335226	0.01682450225878534
1.1436990097214528	0.6849000000000001	1.625	2.082836967372451	0.9391379576509982	45.0	63.0	2.217817893956825	0.01824033190495428
0.901987444272423	0.7137500000000001	1.6953	1.9074075401048565	1.0054200958324335	36.0	45.0	1.8971249411178976	0.020529215446413937
1.0420155584919326	0.8422999999999999	1.8213	2.0134513493614548	0.9714357908695221	52.0	60.0	2.072655103184159	0.01752466778479016
1.2281080839560836	0.6513	1.5078	2.1231194497141206	0.8950113657580371	68.0	108.0	2.3721703778766288	0.011538959566606107
0.9591754346138898	1.8084500000000001	2.7363	1.8282261079481594	0.8690506733342697	191.0	185.0	2.103704840287207	0.005799634064373633
0.9117883923983823	0.9713500000000002	1.9512	1.9281753517101323	1.01638695931175	58.0	58.0	1.897087850296508	0.015927353251414155
0.7564481652136905	0.6184999999999998	1.6904	1.8029061427089021	1.0464579774952116	56.0	62.0	1.7228653051356302	0.012658224435848645
0.8089883401233695	0.5958499999999999	1.6455	1.8207345052671549	1.0117461651437853	48.0	54.0	1.7995961516774313	0.015697651609644123
1.1354431769989153	0.84815	2.2891	2.4907894122852725	1.3553462352863572	49.0	53.0	1.8377513785317146	0.01656493592132135
0.7227244827830065	0.7904000000000001	1.7559	1.668642058541123	0.9459175757581165	73.0	62.0	1.7640459394189505	0.013207873099338461
0.9763324223756312	0.6166	1.4316	1.8541283762413157	0.8777959538656844	61.0	83.0	2.112254411832279	0.01299739290949312
1.1826913763893703	0.6746	1.626	2.1630058679425126	0.9803144915531423	55.0	83.0	2.2064407764855094	0.013755674989998298
1.0018862710770944	0.7791000000000001	1.7744	1.9889482962891338	0.9870620252120396	43.0	52.0	2.0150185555582185	0.01943832930880272
1.2062916235596959	0.8378999999999999	1.7559	2.1651643886168013	0.9588727650571054	38.0	55.0	2.2580309583491567	0.021364823019478774
0.9805256175283357	0.8482000000000001	1.9512	2.055829835157335	1.0753042176289993	56.0	61.0	1.9118588037256596	0.015327475083156001
0.9824811899775716	0.5908499999999999	1.7012	2.068475349420466	1.0859941594428946	35.0	49.0	1.9046836775637688	0.018970437151973576
1.0607543160754274	0.8502500000000002	1.9502	2.1194127003377363	1.058658384262309	56.0	57.0	2.001979799947061	0.01756890205963279
0.9395379702561575	0.6443	1.6953	2.02598990961919	1.0864519393630323	46.0	59.0	1.8647763754805318	0.015237332753371304
0.8759807156022469	0.7812999999999999	1.7559	1.8660746320209123	0.9900939164186654	58.0	65.0	1.884745074256001	0.014067221561379656
0.7281079018050244	0.79895	1.626	1.5854435363281862	0.8573356345231619	60.0	54.0	1.8492682124544932	0.01642508304052085
1.315460440436531	0.8660500000000001	1.6455	2.169180471683066	0.8537200312465347	63.0	86.0	2.540856946411108	0.015643199442428982
0.9559283327833299	0.8155000000000001	1.8613	2.0253272560018156	1.0693989232184857	50.0	55.0	1.8938931132512717	0.016751907470609628
1.1427207612035062	0.8348	1.9033	2.187196612836655	1.0444758516331487	42.0	52.0	2.094061446625828	0.0205058418517415
0.7299000575508988	0.743	1.4355	1.4891249437107783	0.7592248861598795	64.0	68.0	1.9613753063900419	0.01429214146470718
0.9389280379123307	0.8450499999999999	1.5596	1.6736200457491133	0.7346920078367826	62.0	67.0	2.277988637275228	0.01772776941532426
1.0713328887454068	0.6341	1.3066	1.9301859422621528	0.858853053516746	40.0	77.0	2.2473995223730294	0.01517216385195956
0.7760267160189455	1.1023	2.1055	1.7607264554790634	0.9846997394601179	56.0	43.0	1.7880846159707713	0.019498023477614344
1.3035280643717782	0.9232	1.9668	2.3536190120396814	1.0500909476679032	67.0	83.0	2.2413477777965056	0.014028512305949157
0.7578543165445781	0.85345	1.9541	1.9070941115848952	1.149239795040317	57.0	52.0	1.6594396746572733	0.014051849698258503
1.156490992435261	1.0067500000000003	2.084	2.2234347170674003	1.0669437246321392	98.0	101.0	2.0839287637536796	0.010488177840675685
1.0207431616367169	0.8405	2.0312	2.1562193598148798	1.135476198178163	58.0	64.0	1.8989560179900453	0.014456351428038852
0.7023504240684915	0.7213500000000002	1.71	1.7814810484576926	1.0791306243892012	39.0	42.0	1.6508483849821507	0.01721922924427138
0.929056244836975	0.8180500000000002	2.0234	2.0817395056466705	1.1526832608096955	48.0	50.0	1.8059943927565714	0.017055868271050444
1.2735547163576038	0.8485500000000001	2.0156	2.440078087825738	1.1665233714681342	50.0	67.0	2.0917524222037356	0.015891225458175767
1.0929074443574267	0.8865500000000002	2.1484	2.326051725478781	1.2331442811213544	65.0	72.0	1.8862770245859601	0.012715855143216522
1.0382250266286603	1.7468000000000001	2.8867	2.0845269024222604	1.0463018757936	216.0	192.0	1.9922805747062113	0.005179275196791379
0.9393715631292502	1.2702999999999998	2.2188	1.8557767679892316	0.9164052048599814	130.0	112.0	2.025061357298574	0.00908897875760047
0.8352800063812915	0.78305	1.8242	1.7107971094953636	0.875517103114072	58.0	58.0	1.954041906674737	0.01666312772226753
0.845752538417079	0.8737999999999999	2.2129	1.8978167416157026	1.0520642031986236	68.0	57.0	1.803898218232035	0.014931893673200771
1.194259183153012	0.8728500000000001	2.1543	2.4326708479169445	1.2384116647639325	61.0	71.0	1.9643474921408004	0.013719016398563509
1.2723443240732009	0.8567999999999998	2.1172	2.5245107623418983	1.2521664382686974	49.0	66.0	2.016114379996003	0.015326931657866494
1.0175069816408657	0.78405	1.6914	1.9532250977682322	0.9357181161273664	61.0	74.0	2.087407590067826	0.014347463927239654
0.7831880458461182	0.6200000000000001	1.7012	1.8609227344474026	1.0777346886012844	55.0	64.0	1.7266983740335597	0.01231275140073181
1.2074776881582232	0.866	1.8486	2.1878615224617075	0.9803838343034843	82.0	99.0	2.231637697306666	0.011698008353748847
0.914952716459432	0.7926500000000001	1.96	2.050228413202048	1.1352756967426159	63.0	66.0	1.8059299772598458	0.012920332653883216
1.2762106378751146	0.6673	1.9512	2.4795856009285058	1.2033749630533912	51.0	75.0	2.060526167701639	0.01390683713700175
0.6882998839839334	1.1123499999999997	2.4199	1.8301441555297078	1.1418442715457744	111.0	102.0	1.602796634476386	0.006672464564111456
1.3262772365331141	0.7477	1.8896	2.4131457581443128	1.0868685216111986	75.0	107.0	2.220273851125075	0.010754557301049912
1.1067574636663826	1.3328000000000002	2.2988	2.0501513645164122	0.9433939008500295	117.0	101.0	2.173165803456178	0.011087111389231684
1.1969384311800986	0.7715000000000001	1.8242	2.248533125306804	1.0515946941267056	46.0	65.0	2.1382126953142278	0.016867774923015662
0.9365245348883032	0.8456999999999999	1.6914	1.7838893037330268	0.8473647688447236	76.0	76.0	2.105220053183398	0.014131197925507393
1.2230908874576298	0.7172499999999999	1.7656	2.3211229385975054	1.0980320511398756	44.0	72.0	2.113893611928659	0.014998649591231471
1.207313770210067	0.7114499999999999	1.9033	2.332968046796785	1.125654276586718	47.0	66.0	2.0725440264580723	0.015930344678838436
0.9283710442635671	0.95095	2.0801	2.0973340561243035	1.1689630118607364	63.0	54.0	1.7941834214119412	0.015617173817623028
0.9550687615120426	0.8291499999999998	1.9541	2.0359341458286537	1.0808653843166112	44.0	45.0	1.8836149028085445	0.020300089825074644
0.733983383967092	0.8754500000000001	2.2109	1.8134608369634724	1.0794774529963804	89.0	72.0	1.6799432280217834	0.01039461776960498
0.9913641610578239	0.739	1.6904	1.9826970699960527	0.9913329089382288	78.0	98.0	2.0000315253526977	0.01020431367914055
1.0801865828484303	1.1499	2.2109	2.0581509996572973	0.9779644168088669	123.0	102.0	2.104525445182472	0.010524460323284988
1.3547272707859335	0.7477	1.8242	2.482106978801958	1.1273797080160246	49.0	83.0	2.2016601515473413	0.01371797339224074
0.8037613298555437	0.9145500000000002	2.0957	1.9952191120773333	1.1914577822217896	60.0	61.0	1.6746032816678718	0.012193759958115781
1.323462812605326	0.8109	2.0156	2.5409062520720047	1.2174434394666787	53.0	84.0	2.0870836128412593	0.012636766654424831
0.6754346050592588	0.8070999999999999	1.9541	1.7568266504658405	1.0813920454065817	83.0	76.0	1.6245973492484023	0.009211607836076031
1.1507734077863032	0.9092500000000001	2.2246	2.3951031370031064	1.2443297292168032	62.0	66.0	1.924813882338578	0.014313923527517461
0.9363063290960367	0.8379999999999999	2.0801	2.1797480134534073	1.2434416843573706	42.0	45.0	1.7529957704288592	0.017996055893644683
1.1439978537824929	0.6622999999999999	1.5176	1.984967706106898	0.8409698523244051	39.0	61.0	2.3603315869415904	0.020311304069590034
0.6169100214531912	0.9575999999999999	1.9395	1.5042532776689272	0.8873432562157361	71.0	57.0	1.6952326702567562	0.013359356078631797
1.1763724832310993	0.63435	1.501	2.0913729591656094	0.9150004759345101	56.0	91.0	2.28565231840961	0.013105560054349713
1.0571668904969203	0.8163499999999999	2.0195	2.256664242812243	1.1994973523153227	51.0	60.0	1.8813415790008456	0.01519603017277526
0.9797356288946013	0.86815	2.0801	2.1393383365679655	1.1596027076733642	52.0	56.0	1.8448890489919176	0.015777393851769128
1.1083644590357538	0.8157000000000001	1.9512	2.215289362769639	1.1069249037338853	52.0	65.0	2.001300499516284	0.015399043188153567
1.159345559372011	0.8501	1.9766	2.2322738287179593	1.0729282693459483	56.0	64.0	2.080543399307339	0.01651500598032767
1.124244596021014	0.8814	2.2754	2.448228738912048	1.323984142891034	83.0	91.0	1.8491375082228165	0.00974563200543754
0.8688189712231018	1.11445	2.4082	2.048788577275979	1.1799696060528773	123.0	121.0	1.736306229216694	0.006578689386453674
0.7897285161659835	0.77475	1.625	1.65634786408939	0.8666193479234066	69.0	72.0	1.9112749652524272	0.01297965758787178
1.0943921012379165	0.8744000000000001	2.1484	2.3356777676085647	1.2412856663706482	69.0	80.0	1.8816601455149091	0.011400076005348828
1.0758297409743998	0.7326999999999999	2.1797	2.4332176061325637	1.357387865158164	57.0	69.0	1.7925735661774487	0.012203367065336592
1.1545821435586403	0.7764500000000001	2.0312	2.480841893408652	1.3262597498500115	49.0	78.0	1.8705550656190943	0.011582903035121155
0.9591137279884534	0.7503499999999999	2.0234	2.1668447131571598	1.2077309851687064	38.0	44.0	1.7941451695507142	0.019165832447033408
0.7221581153466516	1.1168000000000002	2.2891	1.799451838273631	1.0772937229269794	69.0	49.0	1.6703446794292707	0.015105017078107446
1.0480592223751293	0.73315	1.8896	2.294323043592065	1.2462638212169357	40.0	59.0	1.8409609623038996	0.014923034484248412
1.0829683573405255	0.7986500000000001	1.8203	2.118933896787581	1.0359655394470553	76.0	91.0	2.0453710245212964	0.011344643601181353
1.004201987106965	0.8101	1.9512	2.113648674920411	1.1094466878134461	67.0	70.0	1.9051376673953546	0.013284217889361525
1.1101275026634592	0.7753999999999999	1.8857	2.1941508254619047	1.0840233227984455	49.0	61.0	2.024080828627953	0.016676506607250327
1.1143151794199502	0.8147	1.8955	2.1792441101747095	1.0649289307547594	44.0	57.0	2.046375159166902	0.01812404660779693
0.8567484079803287	0.8311	1.8848	1.884588256401745	1.0278398484214164	53.0	50.0	1.8335427054089657	0.017492677370778684
1.2004195357125031	0.7455499999999999	1.4316	1.9459645546070912	0.745545018894588	50.0	75.0	2.610123473821008	0.018454907415535852
1.0112888180414004	0.78555	1.8896	2.135411656378993	1.1241228383375925	45.0	54.0	1.899624830625222	0.017142861469940113
1.4077210151088848	0.7585500000000001	1.9033	2.533257729453145	1.12553671434426	54.0	79.0	2.2507108805677882	0.014814946132962591
0.8811176777349994	0.9101000000000001	1.9033	1.8931341999921867	1.0120165222571873	86.0	88.0	1.8706554274131484	0.01026754363950633
1.031270274972004	0.9120999999999999	1.7012	1.8559611420530073	0.8246908670810035	58.0	64.0	2.2504931437184323	0.018285018272825988
1.0277775107851441	0.8172999999999999	1.7744	1.9827202129648327	0.9549427021796886	60.0	65.0	2.0762713914030733	0.01621530818551763
0.740988040474402	0.65425	1.6299	1.6570570460583294	0.9160690055839273	67.0	76.0	1.808877973119586	0.011251251145478248
1.054807537707417	1.2280000000000002	2.4062	2.1360445722957717	1.0812370345883546	61.0	51.0	1.9755562415682517	0.01925997879586766
1.3261094680496277	0.77335	2.0156	2.517819634483647	1.1917101664340195	53.0	78.0	2.112778513938313	0.013835147885838069
1.1327831085360351	0.9126000000000001	1.8896	2.120002570949318	0.987219462413283	58.0	69.0	2.147448112263628	0.01598004742973332
1.192144674426588	0.9776	2.0195	2.220504724558231	1.0283600501316428	72.0	78.0	2.159267782012709	0.014237720135394292
0.7545411494258798	1.1679	2.4121	1.8986415641822703	1.1441004147563905	105.0	84.0	1.659506053571829	0.00869945109656045
0.9156709267383131	0.7656	1.626	1.8210763828485064	0.9054054561101933	64.0	73.0	2.011337981849836	0.01381034972686416
0.7958545562709269	0.80795	1.626	1.651441846920608	0.8555872906496811	59.0	61.0	1.930185107900099	0.015553101818617177
0.9139986598845715	0.7654999999999998	1.6299	1.7698902003302073	0.8558915404456358	50.0	56.0	2.0678907509807622	0.018717142293696882
1.181835540829812	0.87775	1.7559	2.0968501102972366	0.9150145694674244	60.0	75.0	2.291602975805826	0.015951428217650707
1.0682727991294303	0.7806499999999998	1.9512	2.207323127639357	1.1390503285099267	47.0	59.0	1.937862684721679	0.016177395699127652
0.6884624072643779	0.8060499999999999	1.8242	1.7899673641349845	1.1015049568706066	58.0	48.0	1.6250197994753566	0.014592860338591866
1.0396384826701563	0.7457499999999999	1.626	1.96511461745876	0.9254761347886037	50.0	65.0	2.123355258542274	0.016713011826577882
0.8147623026216377	0.61695	1.6367	1.8213830906550486	1.0066207880334108	41.0	49.0	1.8094034141828144	0.017459471404363273
0.8957892172254718	0.7422	1.9502	1.917289626322294	1.0215004090968223	57.0	54.0	1.8769347611103746	0.016821824176765317
1.0551033806218877	0.8727	1.8848	2.0418112210989645	0.9867078404770767	54.0	57.0	2.0693169115913195	0.01840622119070808
0.956982694651575	0.80575	1.75	1.9274943237349704	0.9705116290833954	58.0	64.0	1.9860599976070377	0.015467331350351965
1.0383974839751975	0.6853499999999999	1.6953	2.1167189734260723	1.0783214894508748	60.0	79.0	1.962975786102521	0.01231699211184862
0.7946379796214724	0.8105499999999999	2.0801	1.8069810702413354	1.012343090619863	68.0	62.0	1.7849492795322102	0.013481985157107365
1.0436867102320464	0.87565	1.8242	1.9272179643142793	0.8835312540822329	58.0	68.0	2.181267448559219	0.016546568704169345
0.7222654537929034	0.82085	1.5654	1.6988896612424407	0.9766242074495373	35.0	41.0	1.739553093486292	0.01948089542954636
1.2200667833237449	0.8434999999999999	2.0801	2.4027826816814146	1.1827158983576698	79.0	92.0	2.031580606143826	0.011115245727074995
1.1228290237116936	0.79165	2.0898	2.3945563031046055	1.271727279392912	62.0	74.0	1.8829165198435482	0.012337419441606896
0.8812028439475674	0.77	2.0156	2.1090042151028654	1.227801371155298	49.0	52.0	1.717707981640712	0.015009322931614654
0.9650283653678182	0.6511	1.9033	2.1818818772783946	1.2168535119105763	42.0	51.0	1.7930522087680312	0.016517990120490548
0.8799694298773095	0.77895	1.7549	1.9569159464053871	1.0769465165280776	72.0	72.0	1.817096686207042	0.01196715536417395
0.9225179824067004	1.3432500000000003	2.1602	1.8701166910781697	0.9475987086714693	87.0	71.0	1.9735323338505473	0.013813805016511829
1.0872587991856815	0.7172499999999999	1.6455	2.09106137190392	1.0038025727182385	39.0	58.0	2.0831400802664297	0.01825448028155876
0.9133048299137185	0.8915500000000001	1.9541	1.953743173780892	1.0404383438671734	51.0	51.0	1.8778077387258565	0.01782449723018314
0.8952396770160392	0.6805000000000001	1.4951	1.729993687752832	0.8347540107367927	40.0	52.0	2.072459270037959	0.020218149014801564
0.8355651446790879	0.6188	1.5615	1.8061960409427291	0.9706308962636412	49.0	63.0	1.8608474631247809	0.014221584127676976
0.8645205552276566	0.8896000000000001	1.5811	1.6398397924047365	0.77531923717708	75.0	82.0	2.1150510831839497	0.013179176927528817
0.6997438477272092	0.70125	1.501	1.518278931287211	0.8185350835600017	49.0	52.0	1.8548733729089026	0.01714078271913305
1.0434354246256214	0.6862	1.3711	1.7686758642567324	0.725240439631111	51.0	72.0	2.4387441289903227	0.017863033329277928
1.045864022902099	0.8170999999999999	1.5615	1.8410620929397425	0.7951980700376435	54.0	66.0	2.3152245488379886	0.018350789761787868
1.0094493076707156	1.0650499999999998	1.9541	1.9104893392510287	0.9010400315803132	94.0	83.0	2.120315715496309	0.013063603595249565
0.8093649547065984	0.7440500000000001	1.8857	1.8579308636524459	1.0485659089458474	49.0	42.0	1.7718779981320159	0.01964950645690768
1.254668659223859	0.79985	1.8857	2.361308848666324	1.1066401894424651	55.0	81.0	2.1337638657927034	0.013498771954545869
0.972448824293811	1.0393	2.0801	1.9848880920756258	1.0124392677818148	84.0	72.0	1.9605008964383412	0.013489198632311808
0.965664114164045	0.7761	2.0234	2.137913306866399	1.1722491927023542	57.0	61.0	1.8237703384021324	0.014211869949881559
1.0543681039067485	0.7075499999999999	1.8242	2.196395487488358	1.1420273835816095	55.0	72.0	1.9232424012461546	0.013104730670146676
1.3783073447879564	0.89205	2.084	2.610491909138297	1.2321845643503408	67.0	99.0	2.1185883873773874	0.010940437566725966
1.0003587192173289	1.1806500000000002	2.6719	2.2472605550429816	1.2469018358256527	108.0	105.0	1.8022754401952805	0.008093519179387085
1.1407543119844439	0.7985999999999999	1.7656	2.2016652163583883	1.0609109043739444	57.0	85.0	2.075259295838434	0.012391665965145883
0.7760507122644953	0.7294	1.9541	1.891773241437641	1.1157225291731456	68.0	74.0	1.6955588795357759	0.010294065998449101
0.9847644599217329	0.8163500000000001	1.9512	2.0948570839711333	1.1100926240494005	53.0	57.0	1.8871011648825349	0.016073188875378785
0.909727206362257	0.7507999999999999	1.4951	1.7208784403200563	0.8111512339577993	50.0	62.0	2.1215260093034467	0.017501651060751022
1.1640092556710535	0.69175	1.5938	2.0521391372885933	0.8881298816175398	54.0	78.0	2.310629537147267	0.01549084578574651
1.062271040354791	0.7352	1.6914	2.061332998795352	0.999061958440561	58.0	75.0	2.063268430331281	0.013932420365818205
1.0175821980141992	0.68265	1.8896	2.1814821374194144	1.1638999394052152	56.0	69.0	1.8742866663728943	0.013135385878785384
1.0761257918670015	0.83135	1.8848	2.1603568840590643	1.0842310921920628	81.0	88.0	1.9925243793657732	0.011302242912483199
1.4383904315326719	0.6433500000000001	1.6455	2.496356345331355	1.0579659137986832	49.0	98.0	2.35958107229377	0.012638068791301745
0.7238540143640186	0.7229000000000001	1.96	1.9564803297863202	1.2326263154223016	56.0	56.0	1.587245303225596	0.011902234087333948
1.0702419159511936	0.84155	1.96	2.1723376847004774	1.1020957687492838	74.0	77.0	1.9710970192415858	0.01271426998610818
1.0112802822741511	0.7141	1.7559	2.0722252762587776	1.0609449939846265	65.0	83.0	1.9531882312541502	0.011636517955366925
0.9428873895304228	0.7744499999999999	1.8213	1.9498344450587553	1.0069470555283324	64.0	74.0	1.93638228976766	0.012883294654369732
1.0781988060168295	0.7068499999999999	1.6914	2.0970137114519893	1.0188149054351598	64.0	91.0	2.0582872318267715	0.011444443108374903
0.910586755417321	1.5309	2.7305	1.9201617126011554	1.0095749571838344	132.0	98.0	1.9019506168787739	0.009464079468231601
1.10344151361635	0.8876000000000001	1.7012	1.9854443549647836	0.8820028413484337	73.0	86.0	2.2510634454752707	0.0136117060377381
0.8131689230412618	0.8806499999999999	1.9502	1.8132169625073824	1.0000480394661206	67.0	69.0	1.8131298607168662	0.012441771856052952
0.8214155738446451	0.84735	1.71	1.6989309525800065	0.8775153787353613	59.0	52.0	1.93606971883323	0.01832944049449428
0.9824213994866853	0.6936	1.8848	2.1452725064783436	1.1628511069916583	49.0	60.0	1.8448385124973121	0.014724908930725068
1.3911997472447282	0.85815	2.1055	2.6262202924879796	1.2350205452432514	57.0	79.0	2.1264587885626756	0.013777884751302122
1.0945551783875715	1.2742499999999999	2.8633	2.373168039518107	1.2786128611305356	83.0	70.0	1.8560489352655014	0.012746210686253992
1.1061823117455505	0.7147999999999999	2.1543	2.418158493662952	1.3119761819174014	43.0	53.0	1.8431420684245263	0.01664466561192628
1.0358460902714983	0.8018000000000001	2.2109	2.377103543085008	1.3412574528135097	46.0	47.0	1.7722947507942188	0.0175663523155098
1.196500087658705	0.6709	1.8213	2.3773882486888125	1.1808881610301074	48.0	76.0	2.0132204955082105	0.013282963030520636
1.0999610079201543	0.9117500000000001	2.1465	2.2648215546319928	1.1648605467118385	82.0	85.0	1.9442855722301848	0.011285178050163516
0.9020488064893443	0.79065	1.5811	1.686772299405895	0.7847234929165506	71.0	80.0	2.149511661918946	0.013800111718902311
0.8554864770812947	0.6509	1.7549	1.923648431266423	1.0681619541851284	47.0	55.0	1.8008958507925157	0.015431177270515743
1.2515200331957759	0.85045	1.8301	2.252310255857792	1.000790222662016	86.0	108.0	2.250531834600502	0.010835796039997682
0.9487220285439291	0.8297500000000002	2.0234	2.091498018147056	1.1427759896031269	55.0	56.0	1.830190726069953	0.015571321447985089
1.1436697391447153	0.7012499999999999	1.7598	2.196268710479426	1.0525989713347106	60.0	81.0	2.086519909566818	0.013099983788380353
1.2699892178418972	0.7236	1.9248	2.4192732119645135	1.1492839941226163	42.0	62.0	2.1050264550246602	0.017319973621730298
1.250616323881726	0.81175	2.2109	2.5759149545677658	1.3252986306860397	46.0	60.0	1.943648695414667	0.01597945804563741
0.9985589871760614	0.8093499999999999	1.7559	1.9487491498147391	0.9501901626386777	80.0	84.0	2.050904362557347	0.012336431165035737
0.8322038156267488	0.6188000000000001	1.626	1.7936313233502374	0.9614275077234886	55.0	65.0	1.8655918505985736	0.01384051371675592
1.1416043641109295	0.8749499999999999	1.7559	2.052537433186789	0.9109330690758598	60.0	73.0	2.2532252948826255	0.016054679076546344
0.932922469479952	0.7801500000000001	1.9541	2.049231843373492	1.1163093738935401	62.0	68.0	1.8357203579022554	0.012887445652901574
1.0289983655700556	0.7917000000000001	1.8486	2.0219781484534245	0.992979782883369	59.0	65.0	2.0362732286271705	0.01578355625038776
1.005475316307002	0.849	2.0312	2.0869223703895017	1.0814470540824996	67.0	71.0	1.9297499239665024	0.013357942266896846
0.9024634512544234	0.7884	1.8955	1.991049070026369	1.0885856187719456	59.0	62.0	1.8290238596689434	0.014049578954963816
0.9830274875022067	0.6832500000000001	1.8896	2.134272257002736	1.1512447695005295	50.0	63.0	1.8538822616572632	0.014135708296016401
0.814755490534051	0.6842000000000001	1.7559	1.8806623092519634	1.0659068187179124	50.0	57.0	1.7643777825852078	0.01437121927962898
1.2236368265359232	0.7560500000000001	1.9668	2.4222350692116317	1.1985982426757085	43.0	61.0	2.020889888678895	0.016639192071825792
1.0201830864945696	0.9770999999999999	2.4121	2.222584429021902	1.2024013425273323	55.0	55.0	1.8484547134239242	0.016114903606729722
0.9784626421626588	0.7253499999999999	1.7656	2.045293304384309	1.0668306622216501	46.0	59.0	1.9171677163131335	0.015914856802648113
0.7480995303805003	0.9860000000000002	2.0195	1.7617249166911648	1.0136253863106646	62.0	52.0	1.7380434038884818	0.015335848284649681
1.030750840484154	0.67365	1.4355	1.8903324105421313	0.8595815700579773	50.0	78.0	2.19913092182122	0.014576070453119172
1.0353116611628073	0.9598000000000001	1.9502	1.977194574189687	0.9418829130268799	57.0	62.0	2.0991935906721997	0.017255406777270974
1.2378686304271669	0.83495	1.7598	2.301458271224202	1.063589640797035	35.0	57.0	2.1638592394520977	0.019536958840379526
0.7496884958127459	1.23515	2.2754	1.6919375545420894	0.9422490587293435	106.0	72.0	1.7956372987241054	0.011729110682427272
1.039528480537181	1.13355	2.2832	2.0247020396604865	0.9851735591233055	100.0	87.0	2.055172939742968	0.011945514938560615
0.9319781565178412	0.773	1.5654	1.773289597416153	0.8413114408983119	59.0	68.0	2.1077683141010417	0.015819357274223372
0.9650396606533036	0.6460499999999999	1.3652	1.7688570836837927	0.8038174230304891	38.0	58.0	2.200570717931178	0.019618581641057543
0.8975947495404846	0.7098000000000001	1.5615	1.7844836007192864	0.8868888511788018	53.0	63.0	2.012071296586323	0.016010816303431173
1.2921291006784459	0.7254000000000002	1.6914	2.247485924851848	0.9553568241734023	65.0	96.0	2.3525094163601405	0.012856255183571258
0.9462864321018052	0.7345999999999999	2.1484	2.2989064941654633	1.3526200620636581	41.0	48.0	1.6995951477002935	0.01594148187318954
0.7476566337335852	0.86675	1.7344	1.631896011000058	0.8842393772664728	62.0	58.0	1.8455364610032208	0.0152420731069919
1.309175362147826	0.77155	1.7852	2.3342923584474407	1.0251169962996147	46.0	71.0	2.2770984842448057	0.016721080129813312
1.0086603170616923	0.8729999999999998	2.1484	2.2246687861690413	1.216008469107349	59.0	62.0	1.8294846151870412	0.014055440057607716
0.9419761341371609	0.657	1.625	2.001218787717953	1.059242653580792	56.0	79.0	1.8892921097472717	0.011618300998211291
1.0804559323904221	0.71255	1.8203	2.1346151325774523	1.0541592001870301	54.0	70.0	2.0249456934006993	0.014541188816806843
0.9476811972367005	0.7166499999999999	1.7852	2.062842058979003	1.1151608617423023	51.0	61.0	1.8498156900485772	0.014547238232809841
1.2121416196864974	0.7116	1.626	2.2410864130727264	1.028944793386229	39.0	76.0	2.1780433969614372	0.014776746048334535
0.8652061704193237	1.1131000000000002	2.3398	1.8710455408208522	1.0058393704015285	72.0	61.0	1.8601832418569335	0.014679422041045203
0.8931935598332925	0.7502	1.8242	1.9468254442853197	1.0536318844520272	63.0	67.0	1.8477282939267015	0.013220188446222482
1.0654339535460418	0.77395	1.7559	2.064877346905183	0.9994433933591412	57.0	70.0	2.0660273114269185	0.01495513322488647
0.9429546021008599	0.8105499999999999	1.9512	2.0287274492733496	1.0857728471724897	53.0	56.0	1.8684639743537985	0.016104513349001707
1.0672762072249649	0.8629500000000001	1.8896	2.110385226432995	1.0431090192080301	51.0	56.0	2.023168420147765	0.018153864698363557
1.2172706281625962	0.8422999999999999	1.7012	2.1383277738702793	0.921057145707683	51.0	72.0	2.321601633335488	0.016876672770954965
1.2134447088028526	0.84155	1.8203	2.289727542519978	1.0762828337171253	73.0	97.0	2.12744036306146	0.011228027737021414
0.7022292811889634	0.84765	2.0156	1.823311114955916	1.1210818337669526	60.0	56.0	1.6263853895744607	0.012529806430120647
0.7990899005794803	0.7226999999999999	1.7207	1.8115358415266576	1.0124459409471773	47.0	50.0	1.7892667334237171	0.016787369439280227
1.217104882509278	0.7388499999999999	1.626	2.132672901305662	0.9155680187963838	58.0	86.0	2.329344032908989	0.014185159702366964
0.9120792777036477	0.91675	2.041	1.963514207014054	1.0514349293104064	68.0	68.0	1.8674614588863274	0.013251153950565128
1.0865897596601664	0.8101	1.6904	1.9846553574529648	0.8980655977927986	55.0	70.0	2.2099224848727186	0.016342796665817314
1.049426922481313	0.7162	1.8213	2.120554799268023	1.07112787678671	62.0	77.0	1.9797400900716935	0.012796247255844868
0.9606681615018011	0.7907500000000001	1.9033	2.0525748187997817	1.0919066572979805	65.0	70.0	1.8798079534372099	0.013008361136788323
1.1692189239479163	0.8634	1.6367	1.976882972509932	0.8076640485620157	76.0	98.0	2.4476550318534316	0.013177553484538874
0.9407745775934185	1.0687499999999999	2.0156	1.9210172029842167	0.9802426253907982	95.0	82.0	1.9597364501654426	0.011837312810493944
1.2028656597290606	0.9375	2.2832	2.4470341336658135	1.244168473936753	65.0	70.0	1.9668028767221504	0.013940748148777377
1.1567089878997505	0.6566000000000001	1.9668	2.4524407941213244	1.295731806221574	47.0	67.0	1.8927071036966965	0.013738077184313214
0.8334500335691908	0.6526999999999998	2.0195	2.154366406131081	1.3209163725618904	36.0	42.0	1.6309635120599886	0.016802964438472966
0.9628744346540183	0.71825	1.7598	2.0256641704035947	1.0627897357495764	50.0	61.0	1.9059877060018005	0.015254734649329764
1.1696930734785245	0.837	1.8242	2.203375737286584	1.0336826638080596	48.0	62.0	2.1315784954440526	0.01761164812209037
0.896077427974114	0.75145	1.6914	1.863946937442721	0.9678695094686071	48.0	53.0	1.925824627398471	0.01783917607736408
1.0071770525799946	0.6831499999999999	1.6914	1.9775619215339515	0.9703848689539568	42.0	53.0	2.037915042580681	0.019379130360529823
1.0448953821610278	0.6521	1.71	2.1360543336169195	1.0911589514558917	43.0	62.0	1.9576014390633591	0.01563043656577359
0.8834109458089536	0.9097999999999999	1.6914	1.7491290284281247	0.865718082619171	71.0	73.0	2.0204372110794475	0.013899555037421832
0.849789453854029	0.7954499999999999	1.625	1.697200501068176	0.8474110472141471	52.0	56.0	2.0028066741019024	0.017893270859687338
0.9574354945082055	0.7862499999999999	1.6367	1.809169061780661	0.8517335672724555	56.0	64.0	2.1241021034010013	0.01698207994803141
1.2285886245542201	0.78315	1.6367	2.134667205232525	0.906078580678305	48.0	72.0	2.355940478842882	0.01717087626342767
1.12374313382856	0.9512	1.9668	2.128767688144676	1.0050245543161163	60.0	69.0	2.118125053763714	0.015692576352590616
0.8806987874946766	1.5555999999999999	2.3848	1.7948420520551513	0.9141432645604748	153.0	141.0	1.9634144030127723	0.0069032957706536896
0.9529664910968718	0.7221500000000001	1.625	1.8827229731735828	0.929756482076711	47.0	59.0	2.0249635355790354	0.01725247337251731
1.110678724469081	0.9087000000000001	2.2109	2.3758627809728416	1.2651840565037606	60.0	63.0	1.877879166086203	0.01443022594284448
1.1797955702842007	0.9518000000000002	1.9512	2.2078699214289625	1.0280743511447619	66.0	73.0	2.147578060838204	0.015105624271874158
0.8274209260890864	0.77325	1.9512	1.8495833290917334	1.022162403002647	56.0	56.0	1.8094808845037744	0.015278140483014123
0.8961109305782367	0.7161499999999998	1.8203	2.0220142569113126	1.125903326333076	49.0	56.0	1.7959039729430022	0.015084110913929027
1.0566684483385524	0.7168999999999999	1.7549	2.0957946349175263	1.0391261865789738	59.0	75.0	2.0168817435131063	0.013495019952273401
1.0227683481977876	0.8105	1.8213	2.0040472172209465	0.9812788690231588	73.0	80.0	2.042281027834555	0.012877267521911038
1.2695600434470495	0.7777000000000001	1.8213	2.320844337232733	1.0512842937856834	56.0	80.0	2.2076277092234995	0.014281211235789267
0.7789313889586416	0.8105	2.0156	1.9255340373442922	1.1466026483856506	56.0	54.0	1.6793385573069548	0.01384987239253405
1.3123218753321237	0.7428999999999999	1.626	2.2129076390882725	0.9005857637561487	48.0	78.0	2.4571870088848757	0.016628303345193454
1.1406271883422492	0.63365	1.6299	2.1189507683251882	0.9783235799829392	60.0	89.0	2.165899720378957	0.012527712907137372
1.1730239214114626	0.7154500000000001	1.7598	2.2190386204462724	1.0460146990348098	48.0	75.0	2.121422024464712	0.014467088687093644
0.851671194180941	1.2163	2.3848	1.9357851097607968	1.0841139155798558	88.0	75.0	1.785591976951436	0.011152032666071687
1.117469338999627	0.8827	2.0312	2.235974203134567	1.11850486413494	68.0	74.0	1.9990741880804301	0.013504486665513044
0.591014553484303	1.0441999999999998	2.1543	1.6704191297678759	1.079404576283573	69.0	43.0	1.5475375651261238	0.014650568140227426
0.831341712103719	0.6777499999999999	1.6953	1.8562881048098527	1.0249463927061337	43.0	51.0	1.8111075057386694	0.016801415410405137
1.2990173881781766	0.6714999999999999	1.71	2.352906401844498	1.0538890136663215	67.0	101.0	2.232594107475407	0.011472485035369344
0.8861138896035017	0.7812000000000001	1.8242	1.928715725469525	1.0426018358660234	69.0	69.0	1.8499063200550216	0.012861626289525106
0.9549036015581989	0.80765	1.8857	2.0108973480757313	1.0559937465175324	58.0	61.0	1.9042701291624977	0.015233412227081975
1.2470001689779504	0.6352500000000001	1.6953	2.301333617675472	1.0543334486975218	42.0	67.0	2.182737937906116	0.016808043717252794
0.8876013454662388	0.6813	1.6953	1.9100555202053047	1.0224541747390659	51.0	60.0	1.86810868144067	0.01502630649217831
1.088499934370671	0.8091	1.8213	2.1034770444809525	1.0149771101102816	54.0	64.0	2.072437913651472	0.016427013780217214
1.1299740760108286	0.82405	2.002	2.2442869737712043	1.1143128977603758	56.0	66.0	2.0140545606911036	0.015304587370441063
1.01978324897135	0.7257	1.9033	2.1859978106109694	1.1662145616396193	53.0	67.0	1.8744387889803085	0.013529234541027944
0.9851934799097293	0.7172999999999999	1.6914	1.940092057458492	0.9548985775487626	58.0	71.0	2.0317257801752455	0.014404305581191717
1.0880146492275882	0.9434499999999999	2.207	2.125403157734875	1.0373885085072867	77.0	77.0	2.048801524506135	0.013438704305880692
1.1246694741929952	0.74475	1.9512	2.3159155026433007	1.1912460284503055	66.0	79.0	1.9441118352823221	0.012140648260099111
0.7564614446807145	0.7962499999999999	1.6904	1.6517979677865895	0.895336523105875	63.0	59.0	1.844890636267791	0.014975174524427442
0.9885461865594026	0.9488500000000001	1.8213	1.8148888058192312	0.8263426192598285	59.0	58.0	2.196290937341297	0.019570158229658786
0.9901535414046003	0.74475	1.9512	2.1523525867109625	1.1621990453063622	52.0	60.0	1.8519655435989368	0.014817620950885518
1.2470379609026492	0.7174	1.8213	2.3817029562608076	1.1346649953581585	44.0	69.0	2.099036249469404	0.015503291037379291
0.865067925777768	0.9936999999999999	1.9131	1.7526198118490128	0.8875518860712448	84.0	80.0	1.9746674412546152	0.012270121322760634
0.7475787009000645	0.7637	1.8242	1.7677065746918696	1.0201278737918051	46.0	43.0	1.732828422893026	0.018444856097765396
1.1437069971494866	0.7877500000000002	1.7744	2.1943776481867943	1.0506706510373076	44.0	63.0	2.0885494860071763	0.016865100429582783
0.9061546938694647	0.7094499999999999	1.8203	2.0233862713709243	1.1172315775014596	56.0	63.0	1.8110715022000716	0.013600690569630178
1.121447753637118	0.6840999999999999	1.6953	2.1374371738113167	1.0159894201741988	54.0	75.0	2.1037986531836497	0.014306621816150096
0.8762461987593926	0.6326	1.6904	1.9357438007250882	1.0594976019656956	40.0	51.0	1.8270393412252042	0.017049170578943482
1.188057345607588	0.7477	1.6953	2.172886137431411	0.9848287918238228	56.0	79.0	2.2063592732777466	0.014451490276021158
0.6485844998074151	0.7926500000000001	1.8213	1.7269080165532058	1.0783235167457907	47.0	45.0	1.6014748725547043	0.015097803602903002
0.8059005081407911	0.8149500000000001	1.4961	1.5551418509299813	0.7492413427891902	56.0	59.0	2.075622048752244	0.017856674007058256
0.9095239557356806	0.8844500000000001	1.4961	1.5985053256973114	0.6889813699616308	53.0	59.0	2.320099490914147	0.020579435128502833
0.9612983199922358	0.61095	1.1719	1.6420308026494748	0.680732482657239	36.0	58.0	2.4121528566402595	0.021902091945355757
1.152205575230778	0.6760999999999999	1.5723	2.0672794468760736	0.9150738716452956	55.0	84.0	2.2591394104162554	0.013997301208349978
0.7271005930202221	0.7127000000000001	1.7559	1.7520936515604424	1.0249930585402203	55.0	58.0	1.709371236187441	0.013335616401419649
1.0534772703180675	0.6939	1.6953	2.0271780930319463	0.9737008227138787	49.0	62.0	2.0819311699684486	0.01706326408010506
1.1064118381943262	0.7156499999999999	1.5449	1.9764207422126212	0.870008904018295	49.0	71.0	2.2717247295793883	0.016673070852955427
1.051835228319598	0.7183499999999999	1.626	2.017756710111412	0.9659214817918144	58.0	81.0	2.0889448554021293	0.013120671706269382
1.0425565245769108	0.7081	1.5723	1.9358959988811921	0.8933394743042813	61.0	80.0	2.1670328632783606	0.01394651290271956
0.6372532004243783	0.83575	1.71	1.6477856148261267	1.0105324144017485	37.0	37.0	1.6306113404602092	0.019065214965347646
0.8595887359156542	0.7663500000000001	1.8896	1.9580253600780828	1.0984366241624286	49.0	51.0	1.7825565144198476	0.01635191797644369
1.1074291608793971	0.69395	1.8213	2.172232430489989	1.064803269610592	40.0	54.0	2.0400317058421447	0.019047992120435585
1.249030972670045	0.5583499999999999	1.7656	2.475500459444167	1.226469486774122	42.0	78.0	2.0183954726466653	0.012989857376917149
0.8899244561104671	0.9133499999999999	2.2754	2.1260023715132657	1.2360779154027985	60.0	58.0	1.7199582202878116	0.013489198632311804
0.6157349735474982	0.9489500000000001	2.0801	1.604115555326923	0.9883805817794249	58.0	42.0	1.6229735639271297	0.016634273821449743
0.9079088844413232	0.6813	1.8848	2.0538844651031365	1.1459755806618133	43.0	50.0	1.7922584911599915	0.016835574545015095
1.2603535294609314	0.80945	2.1465	2.5038079230459407	1.2434543935850093	52.0	56.0	2.0135904750211226	0.018031612449669786
1.0382299324459718	0.5603	1.7744	2.240221222659377	1.2019912902134053	50.0	74.0	1.863758282526025	0.012138037349290655
0.9643493724568095	0.7718	1.7207	1.8902776696515433	0.9259282971947338	58.0	65.0	2.041494655016462	0.01584039677453348
1.485470260264628	0.8189000000000001	1.9541	2.542774809494489	1.057304549229861	52.0	78.0	2.4049596791640044	0.016230932133381146
0.901866117993277	0.74965	1.6299	1.8038444424803926	0.9019783244871156	55.0	62.0	1.9998755995673152	0.016127584859119797
0.8320993056031409	0.7466499999999999	1.6953	1.7457002399800676	0.9136009343769267	49.0	53.0	1.9107907777815818	0.017625845640226966
1.0659497024534261	0.7155	1.7549	2.104759487510079	1.038809785056653	65.0	91.0	2.0261259739628783	0.011194767870253952
1.0093554102006184	0.8725	1.8857	2.05266927642655	1.0433138662259316	62.0	72.0	1.9674513517699577	0.013560110601978509
1.1806530824627084	0.73125	1.96	2.3255930927157946	1.1449400102530862	72.0	92.0	2.031192090318975	0.01111224654455368
1.1672776921940586	0.77905	2.0801	2.422427650133799	1.2551499579397405	57.0	74.0	1.9299906236782103	0.012818835656465268
1.0835313130055249	0.8547	2.2754	2.4339090328966346	1.3503777198911098	53.0	59.0	1.8023912843385015	0.014405292243934494
1.0681374622394944	0.8545	1.9883	2.3544294983340364	1.286292036094542	46.0	60.0	1.8304004318355171	0.014535988293257734
0.6941597441940803	0.71465	1.9668	1.8454955306363268	1.1513357864422464	45.0	45.0	1.6029168487319498	0.01512665750372078
1.1181268104124624	0.7716000000000001	1.8301	2.2083437529672976	1.0902169425548351	69.0	91.0	2.0256002881336834	0.011190654012050641
0.7477384230183437	1.75425	2.7988	1.856057753113118	1.1083193300947742	263.0	153.0	1.674659732727393	0.004861882287795807
0.9790708256216579	0.81425	1.7656	1.9116166947334232	0.9325458691117653	50.0	56.0	2.049890260684128	0.018491904968148738
1.0580474756397065	0.8102	1.7598	2.04068170727603	0.9826342316363235	55.0	67.0	2.076745997213838	0.015736190652723265
0.8134605162880595	0.7760999999999999	1.8242	1.834770954611138	1.0213104383230784	61.0	62.0	1.7964870285901569	0.013631911588682597
0.8514941797451847	0.7253499999999999	1.6299	1.7788305858348448	0.9273364060896601	63.0	71.0	1.918214980187953	0.013236118544210643
1.057375185368092	0.7273	1.5723	1.9657568649255337	0.9083816795574418	46.0	63.0	2.1640208176404867	0.017678005996792426
0.9909509637304288	0.65215	1.7598	2.144224033212216	1.1532730694817872	53.0	73.0	1.8592509354057003	0.012256458876420474
1.166544414177884	0.8170000000000002	1.8848	2.2731972090323325	1.1066527948544485	57.0	78.0	2.054119611500473	0.0133143614399417
1.0794835557117572	0.7464499999999998	1.8213	2.141449426416835	1.0619658707050776	63.0	81.0	2.0164955254117998	0.012491977832321505
1.1044669389076596	0.7097	1.6914	2.070013079373636	0.9655461404659765	45.0	64.0	2.1438779490896613	0.017190980867907418
1.2907939559859496	0.72255	1.9033	2.403576870382459	1.1127829143965096	49.0	69.0	2.159969244033532	0.0161016053607319
1.0225155705721443	0.8548499999999999	2.1543	2.2955647348416335	1.2730491642694892	48.0	49.0	1.8032019495169238	0.0173583873547238
1.0190865439922487	0.6604000000000001	1.7852	2.16641782493159	1.1473312809393414	39.0	54.0	1.8882234459413532	0.0169820277486477
1.1434654096695689	0.7745499999999998	1.4951	1.9442060994866945	0.8007406898171257	53.0	83.0	2.4280096218548795	0.015418965527699243
1.1000427358680607	0.9353500000000001	2.0801	2.192297428860013	1.0922546929919525	67.0	68.0	2.007130244370729	0.014781385844610024
0.8957829572038423	0.6803999999999999	1.7549	1.984179915516824	1.0883969583129818	55.0	65.0	1.8230296403917816	0.013328277202320413
1.1048796369582479	0.84325	1.8203	2.128702648548496	1.023823011590248	67.0	82.0	2.07917054456717	0.012878147567429206
0.948992828410669	0.6793500000000001	1.6914	1.9397935915850693	0.9908007631744002	74.0	89.0	1.9578038932572237	0.01089029508074716
0.8766510771014202	1.0067500000000003	2.1484	1.9188345296064453	1.042183452505025	122.0	112.0	1.8411677185952953	0.007862687972844852
1.1998438355765821	0.8082499999999999	1.8848	2.237551874585787	1.037708039009205	51.0	65.0	2.1562441365706126	0.0170541620568182
1.2558988778522604	0.8774	2.1797	2.460475652468884	1.2045767746166236	52.0	63.0	2.042605921280502	0.016355728454598595
1.1026634789660643	0.7726499999999998	2.2891	2.5265838817030977	1.4239204027370334	45.0	53.0	1.7743856165320373	0.015609803319457325
1.0909977505754285	0.81325	1.9541	2.161113684538777	1.0701159339633486	51.0	56.0	2.0195136021708793	0.018107283270683904
1.194625695314064	0.84365	1.8848	2.258455990710522	1.0638302953964582	47.0	61.0	2.122947617193833	0.01780440612806244
0.8772020145841044	0.7512999999999999	1.9541	2.045816257135042	1.1686142425509376	42.0	46.0	1.7506343690192265	0.017562560854663237
0.9052270913005837	0.8132499999999999	1.9033	1.8871504760839442	0.9819233847833605	63.0	61.0	1.921891774173707	0.0154512638879208
1.0880581315101912	0.9489000000000001	2.1445	2.2293179987177805	1.1412598672075893	60.0	62.0	1.953383329050577	0.0155802433765258
1.3134620125318877	0.7181500000000001	1.8301	2.378342095921252	1.0648800833893641	40.0	62.0	2.233436546537073	0.0186978268914286
1.0473293789271416	0.7157500000000001	1.9512	2.290370932555406	1.2430415536282644	46.0	63.0	1.842553795462536	0.013995345096265726
1.6064459105417683	0.94065	2.084	2.8172384336914913	1.210792523149723	54.0	92.0	2.326772242004603	0.013242717372562598
0.9157192407542556	0.7112	1.4316	1.6931964145669476	0.777477173812692	62.0	75.0	2.1778085217134215	0.014971694857748446
1.0348797015443223	0.75485	1.5811	1.8634005171625105	0.8285208156181881	46.0	58.0	2.2490690421243826	0.020160826720311338
0.7224447319477966	0.7403	1.7012	1.66457941037595	0.9421346784281533	55.0	60.0	1.7668168346728463	0.013685874731924926
1.0844497714141972	0.7203499999999999	1.5596	2.003496994280063	0.9190472228658657	51.0	76.0	2.179971762530936	0.014793545364463855
0.8971293075508854	0.7378	1.5723	1.764146380258679	0.8670170727077936	50.0	61.0	2.0347308441678638	0.016800622397584612
1.1554620127229187	0.9101	1.7549	2.0385368590182473	0.8830748462953285	73.0	91.0	2.3084530915701063	0.013262927656126413
0.7577088314359156	0.6621999999999999	1.71	1.756747596494244	0.9990387650583284	76.0	84.0	1.7584378684161242	0.009693980482698402
1.035428191318911	0.7918000000000001	2.1602	2.320188201913324	1.2847600105944132	52.0	58.0	1.8059312111059984	0.01470246449712072
1.4216568022457767	0.77125	1.9512	2.660921713475023	1.2392649112292464	48.0	86.0	2.1471774834935116	0.01281908660257319
0.7139724303477049	0.7976499999999997	2.0801	1.9785150399326437	1.2645426095849388	51.0	54.0	1.5646092309867299	0.011959303366931434
1.3801125423484726	0.8971500000000001	2.1465	2.5388000860892097	1.1586875437407371	51.0	66.0	2.191099835157355	0.017146291222826106
1.6642556450154131	0.9408000000000001	2.7793	3.2991880624218792	1.634932417406466	49.0	73.0	2.017935437145141	0.01387506872414004
0.6361162456485818	0.7782000000000002	2.4199	2.3822999442294313	1.7461836985808494	65.0	66.0	1.3642894193580912	0.006790147410586979
0.8164301285954456	1.1254	2.5645	2.2247149979813625	1.408284869385917	123.0	126.0	1.5797336507289539	0.005235566149845092
1.2367515061143068	0.80755	1.7549	2.184914408507845	0.9481629023935381	62.0	85.0	2.3043660567105686	0.014169057790617392
0.6210595540805468	0.9722999999999999	2.0801	1.6984476633275263	1.0773881092469795	68.0	51.0	1.576449237512585	0.012876053239933996
1.2168604041288145	0.8230500000000001	1.8389	2.2954884962598974	1.078628092131083	65.0	96.0	2.128155675720091	0.01135003842301182
0.7567574923317855	0.99655	2.1797	1.859709673832852	1.1029521815010666	93.0	89.0	1.6861199470151769	0.008468619890018216
1.0589996228949576	0.7533	1.8203	2.0993538661831885	1.040354243288231	56.0	73.0	2.0179221450068723	0.013874938545211588
1.0801544850915161	1.2698500000000001	2.3418	2.089153880436641	1.0089993953451248	133.0	120.0	2.0705204483517585	0.008749945422991564
1.627976592967599	0.68675	1.6914	2.6879703063677844	1.0599937134001856	59.0	119.0	2.5358360831645608	0.011281189012280061
1.2856099210755259	0.7533000000000003	2.3398	2.693673294976731	1.4080633739012052	45.0	61.0	1.9130341324862334	0.015342010075041894
1.0401835308359038	0.6395000000000002	2.1172	2.483280879209479	1.4430973483735754	36.0	51.0	1.7207992808026633	0.015354486802124217
0.9575972022906067	0.7155	1.8848	2.114432583277054	1.1568353809864473	48.0	56.0	1.8277730937603691	0.015537267504087564
1.0521286400823735	0.7509999999999999	1.9512	2.1981267016368697	1.1459980615544962	51.0	59.0	1.9180893715083662	0.01592660920159543
1.0585179827048858	0.81395	1.9512	2.2039567342213267	1.1454387515164408	46.0	53.0	1.9241157428134146	0.01781501104268084
0.8881427222125435	0.7828	1.8213	1.8991589751488631	1.0110162529363196	61.0	64.0	1.8784653259856987	0.014211788843140054
1.1815538725039194	0.9605999999999999	1.9668	2.156724852345117	0.9751709798411975	60.0	67.0	2.2116376480935993	0.017091269188187333
1.0441075208947401	0.7135	1.8896	2.202310715191675	1.1582031942969349	38.0	51.0	1.9014890703427438	0.01817901267565824
1.066208540333866	0.8893000000000002	2.041	2.193450714267738	1.1272421739338723	62.0	68.0	1.94585579300408	0.014123599944567937
0.8873551114723444	0.8294500000000001	1.7207	1.8028382155730314	0.915483104100687	63.0	66.0	1.969275246585819	0.014813102599091866
0.8402755526548557	0.79135	1.5938	1.69107484611606	0.8507992934612044	44.0	48.0	1.9876307598193503	0.020646870286966327
1.2037981035090783	0.7853499999999999	1.5078	2.012331772581018	0.8085336690719396	45.0	69.0	2.488865769672691	0.01906504963063172
1.0508190437373528	0.7465999999999999	1.6914	1.9932457545905495	0.9424267108531967	53.0	65.0	2.11501407126505	0.01662565017968305
1.2878580816558367	0.9413	2.0801	2.379520386397816	1.0916623047419791	63.0	75.0	2.179722040471325	0.014988588978004416
0.9685722566012862	0.7525000000000002	2.084	2.246743245420107	1.2781709888188206	51.0	61.0	1.7577798784936907	0.013340236351082474
1.1285906727251322	0.7937000000000001	2.1602	2.446067123859412	1.3174764511342796	44.0	53.0	1.8566306226980176	0.016843147531056472
1.2861556481997447	0.6697	1.9033	2.500102246685885	1.2139465984861404	35.0	64.0	2.0594828881300487	0.016285658424444092
1.0390818589146362	0.8038000000000001	1.8242	2.0540264724611337	1.0149446135464975	49.0	57.0	2.0237818350341272	0.017843048683747535
1.233351079566386	0.71505	1.8203	2.360380385257999	1.127029305691613	51.0	73.0	2.0943380738529487	0.014609511573927599
0.9207633664365946	0.8056000000000001	2.1289	2.175073693990874	1.2543103275542793	41.0	45.0	1.734079395034519	0.01764822120085808
1.2919851405719291	0.7378499999999999	1.8848	2.4466509560484915	1.1546658154765623	60.0	93.0	2.1189256001648333	0.011648741210857478
0.8823752660975352	0.9926999999999999	2.2246	2.0832611654895477	1.2008858993920124	89.0	75.0	1.7347702779625163	0.010596595075329434
0.8926186748138911	0.6273	1.7744	2.0406090994476083	1.1479904246337171	43.0	55.0	1.7775488851300254	0.015088895210216616
1.354145298852924	0.8855	1.96	2.450566111900078	1.096420813047154	40.0	55.0	2.235059826244548	0.02109660816001113
1.1293630216620034	0.8766999999999999	1.7656	2.0717866994874097	0.9424236778254061	47.0	59.0	2.1983601942896325	0.019261487908890124
1.0985954277131573	0.92485	1.8613	2.0594987508860965	0.9609033231729392	49.0	58.0	2.1432944409907475	0.01896258720419802
1.2807379070080298	0.8269	1.7344	2.29321978302521	1.0124818760171803	45.0	74.0	2.2649489707866115	0.015938899280726435
0.6150108835174997	0.84615	1.9248	1.7198109151040628	1.1048000315865631	55.0	53.0	1.5566716744516245	0.012046503591422845
1.0458488364356626	0.8181500000000002	1.7656	2.0613411142290934	1.0154922777934308	56.0	67.0	2.029893441147769	0.015244835752375173
0.7085857984760885	0.6678	1.6299	1.690743448772139	0.9821576502960504	41.0	44.0	1.7214583099388376	0.01780980096189944
1.2359766931008829	0.9329500000000001	1.8896	2.1464733664312634	0.9104966733303806	51.0	60.0	2.3574752432427606	0.020620710344709744
1.2487102518711253	0.7313500000000002	1.5615	2.227154970682081	0.9784447188109558	57.0	88.0	2.276219522538388	0.013484542049469419
1.1671645494402338	0.7254	1.8301	2.3105971324079455	1.1434325829677117	49.0	76.0	2.020755020301177	0.013353874103310572
1.3253642233174632	0.7457499999999999	2.1543	2.693915300121282	1.368551076803819	49.0	77.0	1.968443374735259	0.012689028724400364
0.6873661883878022	0.9733000000000003	2.4062	1.9949992297315913	1.307633041343789	73.0	61.0	1.5256567910531156	0.009990663158156072
1.1689973639765505	0.83945	2.0195	2.389044472374569	1.2200471083980184	48.0	63.0	1.9581575628759953	0.015388838982033883
1.0242944565273708	0.6797	1.7656	2.1330720183117378	1.108777561784367	60.0	78.0	1.9238051813376917	0.012102086007615686
1.16287396820837	0.9829499999999998	2.0195	2.20796415606628	1.04509018785791	69.0	77.0	2.1127020248767985	0.014014146807338639
1.2147599536992328	0.7813999999999999	1.8857	2.3427070692618717	1.1279471155626388	46.0	64.0	2.0769653443311396	0.016476205374582137
1.190785539178616	0.8455000000000001	2.0234	2.3860624349152832	1.1952768957366673	48.0	63.0	1.9962424133068486	0.015829951185766918
1.0460782921869498	0.7135000000000001	1.7656	2.04911069686337	1.00303240467642	61.0	77.0	2.0429157495907786	0.01338480140462821
0.9410789412131186	0.8105499999999999	1.8857	1.9839707542365022	1.0428918130233835	68.0	74.0	1.902374464408628	0.012537854797517314
0.9226624600985918	1.0432000000000001	2.1465	1.9298825422167685	1.0072200821181767	89.0	77.0	1.9160485145989534	0.012183559620307293
0.8975143056210936	0.8299500000000001	1.7207	1.8149241756455836	0.91740987002449	51.0	55.0	1.9783133307658165	0.017895835313560895
0.8301734322131367	0.77345	1.8857	1.8386293695845732	1.0084559373714366	39.0	39.0	1.8232123997177334	0.02221750362969004
0.8811304534808764	0.9225000000000001	1.9668	1.8930504712482044	1.011920017767328	51.0	44.0	1.8707510850758522	0.020536763907054393
1.0500463321367024	0.7794000000000001	1.8242	2.0953535052563774	1.045307173119675	50.0	59.0	2.0045337477240146	0.01700452044865405
1.2350218874633314	0.9053500000000001	2.0234	2.360293443244761	1.1252715557814295	57.0	65.0	2.097532307750983	0.016441431266109505
1.1953160189378913	0.9848500000000002	2.0957	2.3281795714823925	1.1328635525445012	65.0	70.0	2.0551279686358668	0.014846117576969669
0.9866941283212018	0.6816	1.8203	2.0846416789809368	1.097947550659735	53.0	68.0	1.898671459969392	0.01360279834930001
1.203170414614346	0.9393500000000001	1.9512	2.2386270930699896	1.0354566784556436	72.0	87.0	2.161970789940573	0.012785598059429444
0.8591281032281435	1.1683000000000001	2.3418	1.9683928298206854	1.109264726592542	79.0	67.0	1.7745023190877327	0.012349469550009528
1.0329342999612787	0.65215	1.7598	2.0861535371800537	1.053219237218775	49.0	67.0	1.980740061954183	0.014717008414226374
1.2274609600835646	0.78325	1.8242	2.3546418905465183	1.1271809304629536	69.0	106.0	2.0889653354758444	0.010026307097744968
1.1263405010763197	0.81115	1.8242	2.194427168501803	1.0680866674254832	47.0	62.0	2.0545403621517453	0.016755091500387613
1.0997268002748462	0.80905	1.9541	2.2177395757587792	1.118012775483933	53.0	64.0	1.9836442162289498	0.015439895141816807
1.5157264433069106	0.7745499999999998	2.084	2.7787997639924806	1.26307332068557	50.0	79.0	2.200030448338665	0.014399031528268536
1.1891188989743762	0.62415	2.1465	2.659533569600978	1.470414670626602	39.0	60.0	1.8086962968532172	0.01424916969035225
1.0117128338563788	0.81595	1.6367	1.9006486295587206	0.8889357957023417	71.0	84.0	2.1381168794727543	0.013051675234229192
0.7057443735839309	0.8133999999999999	1.626	1.6245321050552706	0.9187877314713396	64.0	64.0	1.7681255957279243	0.01284719933911622
1.0373073990506296	0.7326999999999999	1.5723	1.858833321766416	0.8215259227157864	44.0	55.0	2.262659363957155	0.021418534688795055
1.1654735147194537	0.6686000000000001	1.6709	2.0937617372019375	0.9282882224824837	57.0	80.0	2.255508242475247	0.014668156977713362
1.1050355622221204	0.61785	1.8242	2.2698822545566517	1.1648466923345313	43.0	65.0	1.948653217195011	0.014807344170374699
1.1443862694831575	0.7400500000000001	1.9502	2.343049035032091	1.1986627655489337	53.0	76.0	1.9547191273260915	0.012723175292781231
0.8782832180282871	1.0169499999999998	2.6641	2.115580063168502	1.2372968451402149	81.0	72.0	1.7098403438737912	0.010748078054622776
0.9532547647425114	0.8564499999999999	1.96	2.017566249602051	1.0643114848595396	58.0	59.0	1.895653930548645	0.015638908656402602
1.3202180649194715	0.7820999999999999	1.96	2.5072383134195957	1.1870202485001242	55.0	86.0	2.1122119160036665	0.01254365797716809
1.089855198426139	0.746	1.8896	2.2346379278092217	1.1447827293830826	64.0	79.0	1.9520192526082711	0.01221477572348946
0.997504708994507	0.7016500000000001	2.0195	2.239821676672653	1.242316967678146	51.0	60.0	1.802938972055428	0.014172509393359928
0.8636342960075329	0.7619	1.8955	1.9962656725013217	1.1326313764937888	51.0	56.0	1.7625025351858323	0.014600452369415349
1.3396479106036945	0.7275499999999999	1.625	2.33593711566203	0.9962892050583356	44.0	74.0	2.344637584952307	0.01661303972815978
0.9628285283282882	0.8134999999999999	1.9033	2.0193904314863307	1.0565619031580424	55.0	60.0	1.9112845404045073	0.01557570956595958
0.9126130303210351	0.5586	1.6953	2.0326129520828013	1.1199999217617662	35.0	49.0	1.8148331197072671	0.0175476917027212
0.8611662803622817	0.78145	1.9512	2.015754602850209	1.1545883224879274	56.0	57.0	1.7458643601267552	0.014104236444032995
1.1500678692301405	0.96945	1.9512	2.1495810850134824	0.999513215783342	58.0	65.0	2.1506279767684764	0.016996276674682936
1.0053702628645582	0.7226000000000001	1.8203	2.084590398797594	1.0792201359330358	54.0	68.0	1.9315710756224624	0.013967275957329764
0.7424530218144737	0.7972500000000001	1.6953	1.6635842206785878	0.9211311988641141	58.0	59.0	1.806023097176628	0.014454514296974318
1.2150455025040756	0.7804	1.625	2.0868059393754357	0.8717604368713601	41.0	61.0	2.3937837175368073	0.020644144396707934
0.8409968866995272	0.7795000000000001	1.7559	1.8533329916294319	1.0123361049299047	55.0	55.0	1.830748683766207	0.015862431974574154
0.9862316773605742	0.7088	1.501	1.9575846898705205	0.9713530125099463	34.0	60.0	2.015317464051696	0.01685011863379052
0.9327611970487031	0.6873	1.626	1.8647238217271462	0.9319626246784432	63.0	78.0	2.0008568716696504	0.012828435511326546
0.7745629064289555	0.8503499999999999	1.8242	1.7212248745077283	0.9466619680787728	62.0	65.0	1.8182043142611	0.013269451175073037
0.7375807079538463	0.7781	1.7549	1.6818247323749607	0.9442440244211143	60.0	50.0	1.7811335723369108	0.01665591424706308
0.5964979409885607	1.1690500000000001	2.3633	1.7342520034170732	1.1377540624285125	71.0	44.0	1.524276696244308	0.013821018491716271
0.9883342891042282	0.8201	1.8213	1.9920931664811403	1.0037588773769122	52.0	60.0	1.9846331737428888	0.01648120623256394
0.6031962414835274	0.9051	1.8857	1.6018005676058926	0.9986043261223653	60.0	41.0	1.6040392833323396	0.016627060346245302
0.9750498846600044	0.8424	1.8857	2.0320084225840542	1.0569585379240498	40.0	46.0	1.9225053298448957	0.02049973038779719
0.9735246803578534	0.9224000000000001	1.8848	1.8813375481773937	0.9078128678195403	70.0	70.0	2.0723847555676813	0.01501845537565411
1.2701989239309455	0.6443000000000001	1.6953	2.2918963863518056	1.0216974624208601	57.0	91.0	2.2432241154062122	0.012808502901061903
1.0075030802592468	0.8565499999999999	1.9512	2.1085152231445807	1.1010121428853339	60.0	70.0	1.915069907965742	0.013391386534892498
1.0931331662842259	0.7826000000000001	1.6953	2.0555270571165	0.9623938908322743	53.0	68.0	2.135847989786062	0.016100131952665273
1.0357443949637253	0.9182000000000001	1.96	2.072115316843062	1.0363709218793369	55.0	59.0	1.9993954607347768	0.01694176018948181
0.9144731908287642	1.16975	2.0801	1.9233092934143923	1.008836102585628	106.0	89.0	1.906463585596299	0.010459539046444984
0.7796619966195089	0.8266500000000001	2.0898	1.8894413191830826	1.1097793225635737	55.0	53.0	1.7025378656528771	0.014484658210525192
0.8986175816140629	0.71825	1.8242	2.009681713084255	1.111064131470192	50.0	59.0	1.8087900204509224	0.014491948093439982
1.004226526354165	0.6516	1.8213	2.12255457687324	1.118328050519075	50.0	62.0	1.8979713295110952	0.01491061611894399
1.0545233018720483	0.7251000000000001	1.6953	2.0298509378406533	0.975327635968605	50.0	67.0	2.0811990381312158	0.015782312621736117
0.7680531240756021	0.5607500000000001	1.5596	1.78097086423436	1.012917740158758	54.0	66.0	1.7582581424185766	0.01233555906637247
1.127995594698114	0.7063999999999999	1.6904	2.0969974078689426	0.9690018131708287	56.0	75.0	2.164079962871293	0.014850050770788655
0.6231171843861967	0.7460500000000001	1.8203	1.6675542078912537	1.044437023505057	44.0	42.0	1.5966057984952116	0.01607162275550305
1.0016195983030487	0.6496500000000001	1.626	1.9949733531264828	0.993353754823434	61.0	83.0	2.0083211478684992	0.012120361290516692
1.009147402603836	0.7783499999999999	1.7744	1.9877215228685807	0.9785741202647448	53.0	65.0	2.031242684336287	0.015728655647229597
1.0530263410409009	0.9166500000000002	2.0195	2.1097312740584884	1.0567049330175875	58.0	63.0	1.9965188087405046	0.0158331216401628
0.8428546026535635	0.8745499999999999	1.9033	1.8941548989748493	1.0513002963212859	89.0	73.0	1.8017258300058352	0.01163533550476949
0.8265127931104369	0.8572500000000001	1.6367	1.6578898006770495	0.8313770075666126	61.0	63.0	1.994149207384971	0.015805926348209542
0.9255170529215664	0.7056	1.8896	2.0354039231518626	1.1098868702302962	55.0	64.0	1.833884135172737	0.01367035144246658
0.9042259914959225	0.8827500000000001	2.0664	1.9522410828068486	1.048015091310926	54.0	54.0	1.8627986361960278	0.016619846871040858
1.4981801516982038	1.0044	2.3418	2.762635975306906	1.264455823608702	51.0	67.0	2.184841829762358	0.016828788664393485
1.068959997776439	0.62425	2.1484	2.567825819061033	1.4988658212845938	45.0	62.0	1.7131792469991032	0.012527033968077056
1.1736762452842757	0.6770499999999999	1.7979	2.2755860460363952	1.1019098007521195	53.0	82.0	2.0651291462179313	0.012758926899418396
0.6752293970124368	0.8108499999999998	2.1484	1.78629231020488	1.1110629131924432	67.0	65.0	1.6077328196225038	0.010538887273693875
1.00289507198448	0.8305500000000001	2.0312	2.1669119332561224	1.1640168612716424	40.0	44.0	1.861581223908438	0.020375649199204884
1.4923547409033249	0.85425	2.0312	2.6236810721310797	1.1313263312277548	43.0	63.0	2.3191196029917993	0.01926313056213563
1.182531718215205	1.1315000000000002	2.6133	2.5723132775915665	1.3897815593763614	81.0	84.0	1.8508759597773368	0.010573907301204707
0.7761344691920002	0.8948000000000003	2.2109	2.1826964771738764	1.4065620079818761	60.0	63.0	1.5517954166169978	0.010062513811075686
1.0737085387169554	0.8448499999999999	2.0195	2.2570717647000653	1.18336322598311	49.0	60.0	1.90733640791055	0.01552598870881836
1.0414053903672573	0.9229	2.1602	2.1802434649244895	1.1388380745572322	62.0	64.0	1.9144455332441748	0.014639478367342596
0.9412297582173879	0.76095	1.8301	2.0339685766464646	1.0927388184290767	47.0	59.0	1.8613492468131603	0.015192352120390993
1.0616512200650567	0.9056	1.9131	2.078221464745385	1.0165702446803282	79.0	90.0	2.044346148847692	0.011462661046600556
1.1907234794307882	1.2965500000000003	2.4062	2.2012597813025607	1.0105363018717726	122.0	129.0	2.1783084657377105	0.00870704081836928
1.013013833472246	0.8130000000000002	2.0801	2.2462617354141767	1.2332479019419307	37.0	44.0	1.8214194663352814	0.019660527455546764
1.2251472321254104	0.9073499999999999	2.1543	2.44444295768927	1.2192957255638597	49.0	61.0	2.0047990872426333	0.01645012562185921
1.0071767538361995	0.7123999999999999	1.8857	2.191012041093915	1.1838352872577156	52.0	67.0	1.8507743979901672	0.013255657420304228
1.1574625107893766	0.78555	2.084	2.3701192717216815	1.212656760932305	48.0	61.0	1.9544848534877302	0.01584899023498576
1.2913291355962804	0.8344500000000001	2.0156	2.5166309741728576	1.2253018385765773	62.0	89.0	2.0538865567168383	0.011666926952834276
1.130894509164042	0.8201	1.8896	2.2004248561954527	1.0695303470314106	53.0	66.0	2.0573748676724826	0.01576976797951157
0.9505511720570632	0.7848999999999999	1.8203	2.0099458013738998	1.0593946293168366	57.0	65.0	1.8972588172077458	0.014214099991241165
0.9341351997101421	0.77505	2.0156	2.0732788683161503	1.1391436686060081	41.0	44.0	1.820032824176832	0.019635556126645082
0.9891041756213717	0.6246499999999999	1.3896	1.8278737902468039	0.8387696146254322	29.0	44.0	2.1792322449151595	0.02554136262261355
0.9193952057115241	0.8132499999999999	1.6914	1.8235027485328217	0.9041075428212976	37.0	39.0	2.0169091199510634	0.025952463562019558
1.12446822310911	0.91475	1.6455	1.9543437188945492	0.8298754957854391	43.0	52.0	2.354984246214973	0.02376379632480054
0.8711084004300219	0.7455	1.6953	1.8125847610212678	0.9414763605912458	57.0	66.0	1.9252578576513244	0.014318964921061115
0.8115290973506016	0.7210500000000001	1.626	1.716681860930902	0.9051527635803004	47.0	53.0	1.8965658947343058	0.01742244335548861
0.7288277512291008	0.7456999999999999	1.6914	1.7035546264408314	0.9747268752117306	57.0	57.0	1.747725101014358	0.014131197925507398
0.8631415683802364	0.9228000000000001	1.9131	1.9075016809788734	1.044360112598637	65.0	59.0	1.8264788725342236	0.014729916367476316
0.8377700508498194	0.74745	1.8242	1.8618296593975283	1.024059608547709	44.0	48.0	1.8180871932229805	0.01796711231393373
0.9195791824432564	0.99615	1.96	1.9345211151067445	1.014941932663488	38.0	40.0	1.906041176198156	0.02326448215295946
1.007065199173903	0.7315999999999999	1.6455	2.032414062825375	1.0253488636514718	59.0	76.0	1.9821683476466176	0.012987888122870344
1.0779109286370123	0.7172499999999999	1.8896	2.218133992288986	1.1402230636519737	39.0	52.0	1.945350925620304	0.018462123639226797
0.9231409678368794	1.0231999999999999	2.2246	1.9933561329843863	1.070215165147507	79.0	71.0	1.862575113771298	0.01263800855818732
1.232376834784782	0.8788499999999999	2.2109	2.527346576913465	1.294969742128683	70.0	88.0	1.9516645792503151	0.010962558260928392
1.1897783835589606	0.8392499999999998	2.2109	2.5017358631510946	1.311957479592134	44.0	55.0	1.906872670849701	0.01693106386590253
1.0886574511240867	0.7556	1.8896	2.2044365260834717	1.115779074959385	91.0	114.0	1.975692657763558	0.008617180142021478
0.6191216447509837	0.8501000000000001	1.8857	1.7273060286051947	1.108184383854211	71.0	64.0	1.5586810766974617	0.01000509010856496
1.1317192765745867	0.81595	1.8955	2.1424019024991376	1.010682625924551	72.0	74.0	2.1197573279142046	0.014647285310412903
0.9783261297857719	0.8843000000000001	1.8203	1.9347732997698432	0.9564471699840713	52.0	55.0	2.022875241297504	0.018480133562561552
1.0053839144151828	0.7489000000000001	1.7559	2.0232755282766446	1.0178916138614618	57.0	72.0	1.9877121500207375	0.013765400674268779
1.1237985010951503	0.7119499999999999	1.9541	2.286146429263092	1.1623479281679419	60.0	75.0	1.9668348640380406	0.013011677782050849
1.0199971236344887	0.71685	1.9512	2.226165272930418	1.2061681492959295	48.0	60.0	1.8456508524370225	0.014735494327453203
1.2241963326004914	0.8096999999999999	2.1543	2.4619216358393765	1.237725303238885	49.0	60.0	1.9890694885181786	0.01653489463126228
0.9930897420259348	0.6819499999999998	1.9512	2.1920268743198976	1.1989371322939628	49.0	61.0	1.8283084369284868	0.01427064712464257
0.9852937986617547	0.8128499999999999	2.0234	2.151398983191417	1.1661051845296624	54.0	59.0	1.8449441883402342	0.014975884301358773
0.9611260307699381	0.7515500000000002	1.9541	2.1294306240048733	1.1683045932349352	44.0	49.0	1.8226673389245716	0.017674515802753168
1.1073812564414358	0.66025	1.625	2.1050886950896897	0.9977074386482538	46.0	70.0	2.1099258295014556	0.015388461208234906
1.0475494129932668	0.68445	1.8213	2.131474973191434	1.0839255601981672	46.0	61.0	1.9664403640428498	0.015993220238311436
1.082471908589001	0.6531	1.7598	2.223227314093042	1.1407554055040408	51.0	75.0	1.9489079809450587	0.012835546324631216
0.9747704944596276	0.7190999999999999	1.9512	2.1341095195140896	1.159339025054462	51.0	60.0	1.8407984837859108	0.014672195006128038
1.009622874733089	0.77745	1.96	2.165196494405535	1.155573619672446	40.0	46.0	1.8736984451231005	0.019693234411212436
1.3746987815893283	0.8280000000000001	1.8955	2.4488218180956793	1.074123036506351	66.0	99.0	2.279833626937765	0.012009379254206884
1.0282905942799934	0.7496500000000001	2.0801	2.2874202367219625	1.2591296424419691	63.0	76.0	1.8166677676539453	0.011332823730403282
1.0135439317191317	0.752	1.8896	2.2452331079771106	1.231689176257979	46.0	63.0	1.8228893711629433	0.013749635058840583
0.9299191632778419	0.68855	2.084	2.2324227459493877	1.3025035826715459	46.0	51.0	1.7139474897800269	0.015241625691577963
0.8264955198093851	0.8470499999999999	1.9541	1.928171991484023	1.101676471674638	51.0	53.0	1.7502161851138063	0.015236474215951286
0.983679969100465	0.6887000000000001	1.8896	2.119737432550174	1.1360574634497091	40.0	47.0	1.8658716664854782	0.01914573961526504
1.0941744603978703	0.82315	1.8955	2.1735884598526902	1.07941399945482	45.0	53.0	2.0136745131622393	0.019053405801471298
1.052858685485685	0.8228500000000001	1.8955	2.1495825258774532	1.0967238403917683	39.0	46.0	1.9600034636883483	0.02110556964894561
1.1634848887083717	0.78645	1.6572	2.0639031524459317	0.9004182637375598	56.0	75.0	2.292160472044231	0.01595610732509347
0.8558104394773622	0.7653000000000001	1.7344	1.831927368739337	0.9761169292619747	51.0	57.0	1.8767499198322746	0.01593397230474322
1.3642200234593476	0.9109	1.9766	2.3997743295237206	1.035554306064373	48.0	62.0	2.3173814405195894	0.019556379533263463
0.8877274483918742	0.64405	1.8955	2.141820142980365	1.2540926945884907	40.0	49.0	1.7078643007988872	0.015759047948275318
1.0644755176322327	0.8184	1.9512	2.1562442866745815	1.0917687690423488	60.0	70.0	1.9750008864660449	0.014026475726199764
1.0053109016405057	0.84535	2.084	2.1663974394139145	1.1610865377734088	58.0	63.0	1.8658363256612804	0.014282895810718807
1.264594055968016	0.7952999999999999	2.0195	2.474416989626285	1.209822933658269	51.0	73.0	2.0452720152560917	0.014140996303982675
1.0442665581048718	0.7173499999999999	2.1484	2.3809340938659305	1.3366675357610587	58.0	70.0	1.7812462936120443	0.011898385889025443
