# Supplementary material for: Initiation of chromosome replication controls both division and replication cycles in E. coli through a double-adder mechanism
Source: eLife journal article supplement (doi:10.7554/elife.48063), 2019-11-11
Supplement: supp [file elife-48063-supp-v1.zip › elife_poa_e48063_Figure_7_source_data_6.csv]

dL	dL_bi	L_b	L_d	L_i	T_bd	T_bi	R_db	lambda
1.5937	0.4497	1.5176	3.1113	1.9673	258.0	90.0	2.0501449657353716	0.002851666666666667
1.8018	0.26480000000000015	1.5654	3.3672	1.8302	189.0	39.0	2.1510157148332696	0.003974999999999999
1.4014	0.3147	1.6455	3.0469	1.9602	189.0	48.0	1.851656031601337	0.0037433333333333338
1.5595999999999999	9.999999999998899e-05	1.7549	3.3145	1.755	132.0	0.0	1.8887116074990027	0.005175
2.1748	0.27869999999999995	1.5596	3.7344	1.8383	225.0	39.0	2.394460117978969	0.004103333333333333
2.4209	0.39869999999999983	1.5615	3.9824	1.9602	414.0	96.0	2.5503682356708293	0.00239
2.168	0.3325	2.0156	4.1836	2.3481	225.0	54.0	2.0756102401270096	0.0027916666666666667
1.6035	-0.22809999999999997	2.0156	3.6191	1.7875	105.0	-18.0	1.7955447509426472	0.00569
1.5674	0.21519999999999984	1.4951	3.0625	1.7103	132.0	27.0	2.0483579693665974	0.005235
1.8897	0.46399999999999997	1.3662	3.2559	1.8302	195.0	69.0	2.383179622310057	0.004201666666666667
1.7607	0.1402000000000001	1.626	3.3867	1.7662	147.0	18.0	2.0828413284132843	0.004691666666666666
1.377	0.06459999999999999	1.6914	3.0684	1.756	141.0	9.0	1.8141184817311102	0.0046816666666666664
1.4355	-0.12470000000000003	1.8848	3.3203	1.7601	153.0	-15.0	1.7616192699490663	0.004375
2.0977	0.3359000000000001	1.6953	3.793	2.0312	189.0	39.0	2.2373621187990325	0.004743333333333334
1.7109	0.19490000000000007	2.0801	3.791	2.275	246.0	36.0	1.8225085332435942	0.002416666666666667
1.5721999999999998	0.31899999999999973	1.8301	3.4023	2.1491	183.0	48.0	1.8590787388667285	0.0034533333333333334
1.5741999999999998	0.2677999999999998	1.8203	3.3945	2.0881	183.0	39.0	1.8648025050815797	0.0034616666666666667
1.9776000000000002	0.4035000000000002	1.8857	3.8633	2.2892	246.0	72.0	2.048735217691043	0.002725
2.0791000000000004	0.3942000000000001	1.96	4.0391	2.3542	195.0	48.0	2.060765306122449	0.0037300000000000002
1.6992000000000003	0.1990000000000003	2.0801	3.7793	2.2791	132.0	21.0	1.8168838036632855	0.00455
2.2539	0.4072	1.4961	3.75	1.9033	189.0	48.0	2.5065169440545416	0.0050416666666666665
1.7100000000000002	-0.0036000000000000476	1.8896	3.5996	1.886	111.0	-6.0	1.904953429297206	0.006108333333333333
1.9600000000000002	0.1984999999999999	1.8896	3.8496	2.0881	153.0	21.0	2.037256562235394	0.00474
1.6865	0.0	1.9541	3.6406	1.9541	111.0	0.0	1.863057161864797	0.005493333333333334
1.5166000000000002	0.1403000000000001	1.7549	3.2715	1.8952	141.0	15.0	1.8642087868254602	0.0048066666666666666
2.3251999999999997	0.3740999999999999	1.71	4.0352	2.0841	189.0	42.0	2.359766081871345	0.004745
1.9804	0.26819999999999977	1.7559	3.7363	2.0241	195.0	36.0	2.1278546614271883	0.0038466666666666666
1.8378999999999999	0.08000000000000007	1.9512	3.7891	2.0312	162.0	9.0	1.9419331693316932	0.004543333333333333
2.2909999999999995	0.37319999999999975	1.9668	4.2578	2.34	210.0	51.0	2.1648362822859464	0.003486666666666667
1.6348000000000003	-0.3891	2.4082	4.043	2.0191	126.0	-3.0	1.6788472718212775	0.004261666666666666
1.6835999999999998	0.3887999999999998	2.1543	3.8379	2.5431	183.0	48.0	1.7815067539339924	0.00337
2.0313	0.45050000000000034	2.0195	4.0508	2.47	204.0	57.0	2.0058430304530823	0.003568333333333334
2.4688000000000003	0.4655	2.0898	4.5586	2.5553	300.0	78.0	2.1813570676619776	0.0025366666666666667
3.3379	0.4808000000000001	1.4316	4.7695	1.9124	615.0	153.0	3.3315870354847723	0.0019016666666666665
2.0156	0.1262000000000003	2.3438	4.3594	2.47	258.0	24.0	1.8599709872856047	0.002296666666666667
1.4228	0.1200000000000001	1.96	3.3828	2.08	147.0	15.0	1.725918367346939	0.003881666666666667
2.0907999999999998	0.7866	1.5615	3.6523	2.3481	237.0	114.0	2.3389689401216778	0.003568333333333334
2.0098	0.7246999999999999	1.7656	3.7754	2.4903	225.0	111.0	2.1383099229723603	0.0030633333333333333
1.6943000000000001	0.40500000000000025	1.8213	3.5156	2.2263	168.0	51.0	1.930269587657168	0.003943333333333333
1.8378999999999999	0.13490000000000002	1.6953	3.5332	1.8302	174.0	18.0	2.084114905916357	0.0041066666666666665
1.669	0.11159999999999992	1.7744	3.4434	1.886	168.0	15.0	1.940599639314698	0.004123333333333334
1.8936	0.4071	1.6455	3.5391	2.0526	216.0	63.0	2.15077484047402	0.0035
1.9951999999999999	0.06380000000000008	1.8486	3.8438	1.9124	141.0	6.0	2.0793032565184464	0.005201666666666667
1.4471999999999998	0.13929999999999976	1.8848	3.332	2.0241	120.0	15.0	1.7678268251273344	0.004976666666666666
1.6172	-0.0005999999999999339	2.0156	3.6328	2.015	168.0	18.0	1.8023417344711252	0.0036666666666666666
1.6123	0.23140000000000005	1.8486	3.4609	2.08	168.0	33.0	1.8721735367304988	0.0036266666666666665
1.7499999999999998	0.2558	1.8242	3.5742	2.08	162.0	33.0	1.9593246354566385	0.003973333333333333
1.8223	0.061799999999999855	1.8242	3.6465	1.886	189.0	9.0	1.998958447538647	0.0037533333333333338
1.2949	0.15870000000000006	1.7598	3.0547	1.9185	162.0	27.0	1.7358222525286964	0.0032649999999999997
1.9063	0.39490000000000003	1.3652	3.2715	1.7601	231.0	75.0	2.3963521828303547	0.0033216666666666668
1.8408000000000002	0.1987000000000001	1.6904	3.5312	1.8891	183.0	27.0	2.0889730241362994	0.004275
1.4296999999999997	0.2117	1.6367	3.0664	1.8484	288.0	51.0	1.8735259974338607	0.0024416666666666666
1.7881	0.2652000000000001	1.501	3.2891	1.7662	225.0	48.0	2.1912724850099936	0.003323333333333333
1.4707	0.0006999999999997009	2.1484	3.6191	2.1491	168.0	0.0	1.6845559486129211	0.0037066666666666667
2.0391	0.19069999999999987	1.6953	3.7344	1.886	204.0	27.0	2.202795965315873	0.004136666666666667
1.4346	-0.12559999999999993	1.8857	3.3203	1.7601	132.0	-27.0	1.7607784907461421	0.004645000000000001
1.5254	0.06119999999999992	1.7598	3.2852	1.821	153.0	6.0	1.8668030458006593	0.004916666666666666
1.8886999999999998	0.12959999999999994	1.6914	3.5801	1.821	126.0	12.0	2.116648929880572	0.00563
2.9257999999999997	0.19989999999999974	1.8242	4.75	2.0241	204.0	21.0	2.6038811533823045	0.0047333333333333324
1.9648	0.4032	1.3711	3.3359	1.7743	195.0	51.0	2.4330099919772445	0.005076666666666666
1.9131	0.5190000000000001	1.626	3.5391	2.145	189.0	72.0	2.176568265682657	0.00383
1.4930999999999999	-0.017900000000000027	1.8389	3.332	1.821	153.0	21.0	1.8119527978682908	0.004445
1.8183999999999998	0.3208	1.8242	3.6426	2.145	174.0	36.0	1.9968205240653436	0.004586666666666667
2.1719	0.38749999999999973	1.7656	3.9375	2.1531	231.0	57.0	2.2301200724966015	0.003515
1.8525	0.38870000000000005	1.8213	3.6738	2.21	279.0	72.0	2.017130620985011	0.0026416666666666667
1.8632000000000002	-0.029199999999999893	1.7852	3.6484	1.756	216.0	-30.0	2.0436925834640376	0.003486666666666667
1.9961000000000002	0.2609999999999999	1.625	3.6211	1.886	189.0	36.0	2.228369230769231	0.004141666666666667
2.1357	0.24950000000000006	1.8955	4.0312	2.145	258.0	45.0	2.126721181746241	0.002725
1.5977000000000001	-0.25960000000000005	2.0156	3.6133	1.756	132.0	-33.0	1.792667195872197	0.004255
1.7764	0.050799999999999956	1.9033	3.6797	1.9541	147.0	6.0	1.9333263279567068	0.0050616666666666674
1.8369000000000002	0.12359999999999993	1.8955	3.7324	2.0191	153.0	15.0	1.9690846742284358	0.004635
1.5723	0.26269999999999993	1.6914	3.2637	1.9541	210.0	45.0	1.929584959205392	0.00329
2.0976999999999997	0.8436000000000001	1.6914	3.7891	2.535	258.0	120.0	2.240215206337945	0.0033316666666666664
1.2441	-0.00019999999999997797	1.9512	3.1953	1.951	141.0	-9.0	1.6376076260762606	0.003645
2.0069	0.38870000000000005	1.5654	3.5723	1.9541	210.0	60.0	2.2820365401814233	0.0037716666666666662
2.6826	0.5201	1.7549	4.4375	2.275	288.0	90.0	2.5286341102057097	0.0028683333333333334
1.1309	-0.5978000000000001	2.3203	3.4512	1.7225	111.0	-51.0	1.487393871482136	0.0036766666666666666
1.7167999999999999	0.1359999999999999	1.8242	3.541	1.9602	267.0	27.0	1.9411248766582612	0.0025783333333333335
1.6825999999999999	0.2573000000000001	1.71	3.3926	1.9673	189.0	39.0	1.9839766081871344	0.0034950000000000003
1.7529	0.2831999999999999	1.6709	3.4238	1.9541	195.0	45.0	2.0490753486145192	0.0034766666666666665
1.4413999999999998	-0.03980000000000006	1.4434	2.8848	1.4036	162.0	-24.0	1.998614382707496	0.004675
1.7666000000000002	0.5137	1.3896	3.1562	1.9033	195.0	78.0	2.2713010938399543	0.003998333333333334
1.6445999999999998	0.1904999999999999	1.4355	3.0801	1.626	162.0	24.0	2.1456635318704285	0.004889999999999999
1.9541	0.33420000000000005	1.626	3.5801	1.9602	195.0	45.0	2.2017835178351786	0.004066666666666666
1.7012	0.45779999999999976	1.6953	3.3965	2.1531	237.0	90.0	2.0034802099923317	0.0026616666666666668
1.6641	0.3437000000000001	1.6875	3.3516	2.0312	168.0	45.0	1.9861333333333333	0.004216666666666666
1.7011999999999998	0.3234999999999999	1.6367	3.3379	1.9602	216.0	57.0	2.039408566016985	0.0032433333333333333
2.9805	0.5083	1.6367	4.6172	2.145	519.0	138.0	2.8210423412965113	0.0019749999999999998
1.1738	-0.5208000000000002	2.3418	3.5156	1.821	120.0	-114.0	1.5012383636518916	0.003486666666666667
1.8633000000000002	0.059699999999999864	1.6953	3.5586	1.755	237.0	12.0	2.0990975048663953	0.0030216666666666664
1.9589	0.21219999999999994	1.5723	3.5312	1.7845	216.0	33.0	2.2458818291674616	0.003691666666666667
1.75	0.07309999999999994	1.7012	3.4512	1.7743	153.0	9.0	2.0286856336703503	0.004673333333333333
2.1641000000000004	0.19459999999999988	1.6914	3.8555	1.886	216.0	27.0	2.2794726262267946	0.0039366666666666664
2.5116999999999994	0.5239	1.8242	4.3359	2.3481	237.0	69.0	2.376877535357965	0.003616666666666667
2.1484	0.46220000000000017	1.7559	3.9043	2.2181	315.0	93.0	2.2235320918047727	0.0025183333333333334
1.4335000000000004	-0.11499999999999977	2.002	3.4355	1.887	120.0	-12.0	1.7160339660339663	0.004748333333333334
1.6982	0.3503000000000003	1.876	3.5742	2.2263	162.0	42.0	1.905223880597015	0.004043333333333334
1.5947	0.3234999999999999	1.5615	3.1562	1.885	174.0	45.0	2.0212616074287544	0.004155
2.0858999999999996	0.7901	1.3711	3.457	2.1612	246.0	132.0	2.5213332360878127	0.0034266666666666664
1.5068000000000001	0.45809999999999995	1.626	3.1328	2.0841	216.0	81.0	1.9266912669126692	0.003015
1.9082000000000001	0.31369999999999987	1.5723	3.4805	1.886	273.0	57.0	2.213636074540482	0.003223333333333333
2.0195	0.2932999999999999	1.4668	3.4863	1.7601	174.0	33.0	2.376806653940551	0.005293333333333333
2.2813	0.1935	1.6367	3.918	1.8302	225.0	27.0	2.3938412659619965	0.004006666666666667
1.6943	-0.0976999999999999	1.9502	3.6445	1.8525	147.0	-15.0	1.868782688954979	0.004198333333333333
2.0195	0.19879999999999987	1.8203	3.8398	2.0191	216.0	27.0	2.10943251112454	0.0037433333333333338
1.6953	0.2596000000000003	2.0195	3.7148	2.2791	162.0	30.0	1.8394652141619214	0.0038599999999999997
1.8194	0.05069999999999997	1.7744	3.5938	1.8251	210.0	9.0	2.025360685302074	0.003316666666666667
1.8906	0.19510000000000005	1.7559	3.6465	1.951	231.0	33.0	2.076712796856313	0.003205
1.5586	0.0008999999999999009	1.8242	3.3828	1.8251	153.0	0.0	1.854401929612981	0.00401
2.1015	0.5880000000000001	1.7012	3.8027	2.2892	378.0	123.0	2.2353044909475663	0.00239
1.6172	0.0040000000000000036	2.0801	3.6973	2.0841	168.0	0.0	1.7774626219893275	0.003303333333333333
1.833	0.04049999999999998	1.8486	3.6816	1.8891	252.0	6.0	1.991561181434599	0.0029166666666666664
1.2841	0.00019999999999997797	1.96	3.2441	1.9602	132.0	0.0	1.6551530612244898	0.0038516666666666664
1.376	0.09599999999999986	1.5615	2.9375	1.6575	120.0	12.0	1.8812039705411463	0.00554
1.8955000000000002	0.20930000000000004	1.501	3.3965	1.7103	174.0	27.0	2.2628247834776816	0.005095000000000001
1.6192	0.3306	1.6367	3.2559	1.9673	174.0	39.0	1.9893077534062442	0.004563333333333333
2.0566999999999998	0.5188000000000001	1.6953	3.752	2.2141	174.0	57.0	2.213177608682829	0.004601666666666667
1.8017	0.1851999999999998	1.8389	3.6406	2.0241	147.0	21.0	1.9797705149817826	0.00455
1.8252	0.2642	1.7549	3.5801	2.0191	174.0	33.0	2.040059262636048	0.004428333333333333
1.8925999999999998	0.25849999999999973	1.7656	3.6582	2.0241	189.0	36.0	2.0719302220208426	0.003841666666666667
1.6924000000000001	0.13470000000000004	1.6904	3.3828	1.8251	162.0	18.0	2.001183151916706	0.004548333333333333
1.8241999999999998	0.20429999999999993	1.7559	3.5801	1.9602	189.0	27.0	2.038897431516601	0.0040950000000000005
2.1456	0.26349999999999985	1.8896	4.0352	2.1531	267.0	42.0	2.1354784081287046	0.0030233333333333336
1.4843	0.07299999999999995	1.5723	3.0566	1.6453	183.0	12.0	1.944031037333842	0.004181666666666667
2.2196999999999996	0.6579999999999997	1.4951	3.7148	2.1531	273.0	108.0	2.4846498561969095	0.0033883333333333335
1.6405999999999998	0.0915999999999999	1.8848	3.5254	1.9764	174.0	12.0	1.870437181663837	0.0039966666666666675
1.2969	-0.4584999999999999	2.0195	3.3164	1.561	147.0	-75.0	1.6421886605595444	0.0035916666666666666
1.9531	0.2641	1.625	3.5781	1.8891	231.0	45.0	2.2019076923076923	0.0032483333333333335
1.7305000000000001	0.22930000000000006	1.7207	3.4512	1.95	204.0	30.0	2.0056953565409428	0.004088333333333334
1.3731	0.014999999999999902	1.6953	3.0684	1.7103	141.0	3.0	1.8099451424526631	0.00437
1.9062000000000001	0.008000000000000007	2.0801	3.9863	2.0881	189.0	0.0	1.9163982500841308	0.0032783333333333336
1.6366999999999998	0.1299999999999999	1.625	3.2617	1.755	216.0	24.0	2.0072	0.0031400000000000004
1.5655000000000001	0.2048000000000001	1.6904	3.2559	1.8952	231.0	39.0	1.926112162801704	0.0030299999999999997
2.3662	0.5230999999999999	1.626	3.9922	2.1491	252.0	87.0	2.455227552275523	0.003185
1.96	0.26869999999999994	1.5615	3.5215	1.8302	225.0	42.0	2.255203330131284	0.003853333333333333
2.4717000000000002	0.3941999999999999	1.7549	4.2266	2.1491	204.0	48.0	2.408456322297567	0.004241666666666666
1.3867000000000003	-0.2600999999999998	2.0801	3.4668	1.82	120.0	-30.0	1.6666506417960676	0.004455
1.9433999999999998	0.3143	1.6367	3.5801	1.951	279.0	69.0	2.1873892588745645	0.002586666666666667
1.624	0.19500000000000006	1.626	3.25	1.821	204.0	33.0	1.9987699876998772	0.0035166666666666666
2.9130999999999996	0.0988	1.6572	4.5703	1.756	258.0	15.0	2.7578445570842383	0.0040216666666666664
2.2901	0.39259999999999984	1.5615	3.8516	1.9541	435.0	108.0	2.4666026256804354	0.0021016666666666666
2.3545	0.16970000000000018	1.7549	4.1094	1.9246	351.0	39.0	2.3416718901361904	0.0023383333333333333
1.5644	-0.13200000000000012	2.084	3.6484	1.952	126.0	-9.0	1.7506717850287907	0.004553333333333334
1.4219	-0.00019999999999997797	1.6953	3.1172	1.6951	126.0	-18.0	1.8387306081519494	0.0049633333333333335
2.1582	0.39250000000000007	1.6875	3.8457	2.08	237.0	57.0	2.2789333333333333	0.003633333333333333
1.2919999999999998	-0.23449999999999993	1.96	3.252	1.7255	111.0	-42.0	1.6591836734693877	0.004645000000000001
1.71	0.25949999999999984	1.5615	3.2715	1.821	147.0	30.0	2.0951008645533142	0.004996666666666667
1.4150000000000003	0.00019999999999997797	1.5811	2.9961	1.5813	120.0	0.0	1.8949465561950543	0.005095000000000001
0.6562999999999999	0.0009000000000001229	3.1191	3.7754	3.12	162.0	0.0	1.2104132602353244	0.0025499999999999997
1.5663999999999998	0.015600000000000058	2.0156	3.582	2.0312	153.0	3.0	1.7771383210954552	0.004003333333333334
1.7051000000000003	0.0040000000000000036	2.0801	3.7852	2.0841	162.0	0.0	1.8197202057593387	0.004066666666666666
1.7822	0.08729999999999993	1.9541	3.7363	2.0414	147.0	9.0	1.9120311140678574	0.00455
1.6288999999999998	0.26750000000000007	2.0156	3.6445	2.2831	189.0	36.0	1.8081464576304822	0.0033883333333333335
1.8672	0.06440000000000001	2.0156	3.8828	2.08	153.0	6.0	1.9263742806112323	0.004505
1.4394999999999998	0.0006999999999997009	2.1484	3.5879	2.1491	147.0	0.0	1.6700335133122322	0.003876666666666667
1.8301000000000003	0.39400000000000013	2.0801	3.9102	2.4741	183.0	48.0	1.879813470506226	0.003616666666666667
1.7577999999999998	0.21129999999999982	1.8301	3.5879	2.0414	174.0	27.0	1.9604939620785748	0.003971666666666667
1.8232	0.3399000000000001	1.8213	3.6445	2.1612	183.0	42.0	2.001043210893318	0.00406
2.1592	0.3351000000000002	1.9541	4.1133	2.2892	147.0	33.0	2.1049588045647614	0.004988333333333333
1.6054999999999997	0.2163999999999997	2.2109	3.8164	2.4273	111.0	18.0	1.7261748609163687	0.00513
2.2411999999999996	0.4590000000000001	1.9541	4.1953	2.4131	258.0	72.0	2.1469218566091803	0.0028933333333333333
1.4062	0.12929999999999997	1.7598	3.166	1.8891	174.0	21.0	1.7990680759177178	0.003466666666666667
1.7440999999999998	-0.07119999999999993	1.5723	3.3164	1.5011	204.0	-21.0	2.1092666793868853	0.0039366666666666664
1.8252000000000002	0.13470000000000004	1.6904	3.5156	1.8251	183.0	18.0	2.079744439185992	0.004343333333333333
1.9717000000000002	0.00029999999999996696	1.8857	3.8574	1.886	162.0	0.0	2.0456064061091372	0.00458
1.6904	0.26000000000000023	1.9541	3.6445	2.2141	147.0	30.0	1.8650529655595927	0.004123333333333334
1.7891	0.4588000000000001	1.8203	3.6094	2.2791	204.0	63.0	1.9828599681371202	0.0035733333333333333
1.6914	0.07099999999999995	1.8242	3.5156	1.8952	210.0	12.0	1.9272009648064905	0.0030833333333333333
1.3642000000000003	0.14600000000000013	1.8213	3.1855	1.9673	141.0	18.0	1.7490254214022953	0.0043033333333333335
2.5352000000000006	0.4616999999999998	1.6914	4.2266	2.1531	330.0	81.0	2.498876670214024	0.00293
1.625	0.12959999999999994	1.7656	3.3906	1.8952	153.0	15.0	1.9203670140462166	0.004423333333333334
1.3633000000000002	-0.06519999999999992	1.6953	3.0586	1.6301	153.0	-15.0	1.8041644546687903	0.004421666666666666
1.4970000000000003	0.08430000000000004	1.626	3.123	1.7103	174.0	12.0	1.9206642066420667	0.004131666666666667
2.2178	0.5270999999999999	1.626	3.8438	2.1531	246.0	75.0	2.3639606396063964	0.0036716666666666664
1.5019	0.1341000000000001	2.084	3.5859	2.2181	126.0	12.0	1.7206813819577735	0.00464
2.5918	0.2539999999999998	1.8301	4.4219	2.0841	216.0	33.0	2.416206764657669	0.0037966666666666665
1.4960999999999998	0.06789999999999985	1.9512	3.4473	2.0191	168.0	9.0	1.7667589175891758	0.0036383333333333333
1.8252000000000002	0.32840000000000025	1.8857	3.7109	2.2141	210.0	45.0	1.9679164236092699	0.003531666666666667
1.2978999999999998	-0.050799999999999956	1.9541	3.252	1.9033	153.0	-12.0	1.664193234737219	0.0035133333333333336
1.8886999999999998	0.3991	1.4961	3.3848	1.8952	231.0	69.0	2.26241561392955	0.0034050000000000005
1.7069999999999999	0.32879999999999976	1.6953	3.4023	2.0241	195.0	45.0	2.006901433374624	0.0038683333333333334
1.7530000000000001	0.3206	1.5654	3.3184	1.886	162.0	39.0	2.1198415740385843	0.004786666666666667
1.6914	0.20379999999999998	1.6914	3.3828	1.8952	168.0	27.0	2.0	0.004441666666666667
1.7675999999999998	0.26290000000000013	1.9512	3.7188	2.2141	132.0	27.0	1.9059040590405902	0.004855
2.2793	0.25929999999999986	1.7598	4.0391	2.0191	183.0	30.0	2.2952040004545973	0.004811666666666667
2.0439	0.34130000000000016	1.7549	3.7988	2.0962	216.0	48.0	2.1646817482477636	0.0038133333333333335
1.8906	0.3025000000000002	1.9766	3.8672	2.2791	210.0	42.0	1.9564909440453304	0.0033083333333333337
1.3125	-0.00039999999999995595	2.0195	3.332	2.0191	120.0	6.0	1.6499133448873484	0.00429
1.8866999999999998	0.5310000000000001	1.6953	3.582	2.2263	237.0	87.0	2.112900371615643	0.003101666666666666
2.0527	0.45779999999999976	1.6953	3.748	2.1531	225.0	72.0	2.2108181442812485	0.0032750000000000006
2.1347999999999994	-0.7480000000000002	2.373	4.5078	1.625	132.0	-60.0	1.8996207332490516	0.004431666666666667
1.8378999999999999	0.3971999999999998	1.7559	3.5938	2.1531	246.0	75.0	2.0466996981604875	0.002693333333333333
1.6923000000000001	0.17710000000000004	1.8389	3.5312	2.016	237.0	33.0	1.920278427320681	0.002825
1.8330000000000002	0.15660000000000007	1.96	3.793	2.1166	168.0	18.0	1.9352040816326532	0.004083333333333334
1.8241999999999998	0.18690000000000007	2.084	3.9082	2.2709	162.0	24.0	1.8753358925143953	0.003815
2.293	0.47120000000000006	1.4961	3.7891	1.9673	204.0	60.0	2.5326515607245503	0.004546666666666667
1.8388000000000002	0.1851999999999998	1.8389	3.6777	2.0241	162.0	21.0	1.9999456196639296	0.004363333333333333
2.1348	0.40379999999999994	1.7656	3.9004	2.1694	162.0	45.0	2.2091073855913	0.004541666666666667
1.4179	9.999999999998899e-05	1.7559	3.1738	1.756	132.0	0.0	1.8075061222165272	0.004331666666666667
1.8788999999999998	0.31659999999999977	2.0234	3.9023	2.34	216.0	45.0	1.9285855490758128	0.0032949999999999993
1.625	0.06909999999999972	2.084	3.709	2.1531	174.0	9.0	1.7797504798464492	0.0034916666666666664
1.8252000000000002	0.4081999999999999	1.9541	3.7793	2.3623	195.0	51.0	1.9340361291643213	0.0036933333333333336
1.7538999999999998	-0.009300000000000086	2.1543	3.9082	2.145	147.0	18.0	1.814139163533398	0.004483333333333333
1.7598000000000003	0.06430000000000025	2.4707	4.2305	2.535	210.0	9.0	1.7122677783624076	0.00249
1.334	-0.0965999999999998	2.0801	3.4141	1.9835	162.0	-21.0	1.64131532137878	0.0029683333333333337
1.5244	0.06780000000000008	1.8213	3.3457	1.8891	168.0	9.0	1.8369845714599462	0.003703333333333333
1.6806	0.11509999999999998	1.71	3.3906	1.8251	153.0	15.0	1.9828070175438597	0.004658333333333334
1.8545000000000003	0.2048000000000001	1.6904	3.5449	1.8952	189.0	27.0	2.097077614765736	0.004196666666666667
1.8965	0.43930000000000025	2.0957	3.9922	2.535	273.0	81.0	1.904948227322613	0.0023666666666666662
1.7099000000000002	0.19130000000000003	1.9131	3.623	2.1044	300.0	48.0	1.8937849563535625	0.00201
2.3251999999999997	0.2481	1.9131	4.2383	2.1612	342.0	60.0	2.2154095447179967	0.002075
1.8866999999999998	0.45100000000000007	2.084	3.9707	2.535	216.0	66.0	1.9053262955854124	0.0029783333333333333
1.8828	0.2559999999999998	2.084	3.9668	2.34	246.0	39.0	1.9034548944337812	0.0028683333333333334
1.8241999999999998	0.25849999999999973	2.1465	3.9707	2.405	204.0	39.0	1.8498485907290938	0.00293
1.6229999999999998	0.06099999999999994	2.084	3.707	2.145	174.0	9.0	1.7787907869481765	0.0034100000000000003
1.7637	0.39349999999999996	2.0156	3.7793	2.4091	162.0	45.0	1.875024806509228	0.0038399999999999997
1.8232	0.3250000000000002	1.626	3.4492	1.951	195.0	48.0	2.121279212792128	0.003791666666666667
1.6260000000000001	0.2691999999999999	1.7549	3.3809	2.0241	162.0	36.0	1.926548521283264	0.0041266666666666665
4.1055	0.5267000000000002	1.6914	5.7969	2.2181	531.0	141.0	3.427279177013125	0.0019366666666666666
1.8477000000000001	-0.1956	2.0156	3.8633	1.82	183.0	-33.0	1.916699742012304	0.0036300000000000004
1.5897999999999999	-0.2277	1.9512	3.541	1.7235	183.0	-33.0	1.814780647806478	0.0031716666666666664
1.6347999999999998	0.13379999999999992	1.8203	3.4551	1.9541	162.0	18.0	1.8980937208152502	0.0040950000000000005
1.7441	0.06440000000000001	1.9668	3.7109	2.0312	195.0	9.0	1.8867703884482407	0.003293333333333333
1.7519	0.1301000000000001	2.084	3.8359	2.2141	231.0	21.0	1.8406429942418425	0.0027500000000000003
1.7637	0.13400000000000034	2.0801	3.8438	2.2141	210.0	21.0	1.8478919282726793	0.003106666666666667
1.5566999999999998	0.1947000000000001	2.0234	3.5801	2.2181	147.0	24.0	1.7693486211327467	0.004065
2.9326000000000003	0.4540000000000002	1.626	4.5586	2.08	363.0	90.0	2.803567035670357	0.0027600000000000003
1.4375	-0.2299	2.1484	3.5859	1.9185	141.0	-54.0	1.6691025879724446	0.0034100000000000003
2.1602	-0.009799999999999809	2.0898	4.25	2.08	288.0	24.0	2.0336874342042304	0.0026783333333333338
1.9482000000000002	0.061100000000000154	1.6299	3.5781	1.691	168.0	9.0	2.1952880544818703	0.004621666666666666
1.8262	0.06469999999999976	2.0234	3.8496	2.0881	195.0	9.0	1.9025402787387566	0.0033333333333333335
1.4228	0.07120000000000015	1.96	3.3828	2.0312	162.0	9.0	1.725918367346939	0.003941666666666666
1.9893	0.6387	1.7744	3.7637	2.4131	225.0	84.0	2.1211113615870154	0.0036300000000000004
2.2061	0.7657999999999998	1.9033	4.1094	2.6691	246.0	117.0	2.159092103189198	0.0028783333333333334
1.6367000000000003	0.12990000000000013	2.0801	3.7168	2.21	258.0	27.0	1.786837171289842	0.0021550000000000002
1.9022999999999999	0.403	1.9512	3.8535	2.3542	237.0	66.0	1.9749384993849937	0.0028016666666666667
1.7178	0.22009999999999996	1.8213	3.5391	2.0414	195.0	33.0	1.9431724592324164	0.003475
1.3702	0.00029999999999996696	1.8857	3.2559	1.886	162.0	0.0	1.7266267168690672	0.003483333333333333
1.7558999999999998	0.1977	1.6914	3.4473	1.8891	288.0	42.0	2.038134090102873	0.0025983333333333336
1.5596	-0.11099999999999999	1.8213	3.3809	1.7103	183.0	-15.0	1.8563114259045737	0.003703333333333333
1.6953	-0.060799999999999965	1.7559	3.4512	1.6951	204.0	-15.0	1.9654877840423715	0.003505
1.4228	-0.1755	1.96	3.3828	1.7845	183.0	-9.0	1.725918367346939	0.003501666666666667
1.3662	0.07390000000000008	1.8213	3.1875	1.8952	168.0	12.0	1.7501235381321034	0.003728333333333334
1.8193000000000001	0.4578000000000002	1.8213	3.6406	2.2791	258.0	78.0	1.9989018832701917	0.002845
1.5703	0.20379999999999976	1.8203	3.3906	2.0241	168.0	27.0	1.86266000109872	0.003938333333333334
1.6299000000000001	0.1983999999999999	1.8857	3.5156	2.0841	174.0	30.0	1.864347457177706	0.003313333333333333
3.5909000000000004	0.33240000000000025	1.8857	5.4766	2.2181	624.0	123.0	2.9042795778755903	0.0013283333333333333
1.2930000000000001	-0.7891000000000004	2.8711	4.1641	2.082	84.0	-27.0	1.4503500400543345	0.004445
1.5625	-0.25949999999999984	2.1445	3.707	1.885	153.0	-24.0	1.7286080671485196	0.0035850000000000005
1.5967	0.1484000000000001	1.7549	3.3516	1.9033	174.0	21.0	1.90985241324292	0.0038633333333333336
1.8916000000000002	0.33030000000000004	1.6299	3.5215	1.9602	225.0	51.0	2.1605619976685686	0.003616666666666667
1.9043	0.33279999999999976	1.8203	3.7246	2.1531	210.0	45.0	2.04614623963083	0.0036466666666666665
2.083	0.32310000000000016	1.96	4.043	2.2831	195.0	42.0	2.0627551020408164	0.003523333333333333
2.1992	0.3304	1.4297	3.6289	1.7601	210.0	42.0	2.538224802406099	0.005058333333333333
2.9160000000000004	-0.010099999999999998	1.8301	4.7461	1.82	378.0	-24.0	2.5933555543412927	0.002501666666666667
2.1582000000000003	-0.4848999999999999	2.2754	4.4336	1.7905	183.0	-111.0	1.9484925727344644	0.0032199999999999998
1.3613	1.0312000000000001	2.2188	3.5801	3.25	120.0	96.0	1.6135298359473589	0.003991666666666667
2.2245999999999997	-0.13380000000000014	1.7598	3.9844	1.626	189.0	-24.0	2.2641209228321397	0.004801666666666667
1.7793	0.054400000000000004	1.7656	3.5449	1.82	153.0	6.0	2.007759401903036	0.004795000000000001
2.1524	-0.0032000000000000917	1.8242	3.9766	1.821	141.0	-3.0	2.1799144830610677	0.005738333333333333
2.2333999999999996	0.07180000000000009	1.8955	4.1289	1.9673	195.0	9.0	2.1782643102083883	0.004013333333333333
2.4296999999999995	-0.11270000000000002	2.0312	4.4609	1.9185	330.0	-21.0	2.196189444663253	0.0021
1.6562999999999999	-0.42310000000000003	2.2441	3.9004	1.821	120.0	-51.0	1.7380687135154405	0.004595
1.5303000000000002	-0.19520000000000004	1.9502	3.4805	1.755	111.0	-21.0	1.7846887498718083	0.004955
2.04	0.5268000000000002	1.8213	3.8613	2.3481	258.0	84.0	2.120079064404546	0.0030466666666666663
2.0176000000000003	0.4403999999999999	2.2246	4.2422	2.665	216.0	57.0	1.906949563966556	0.00313
1.3984	0.12230000000000008	2.3477	3.7461	2.47	111.0	12.0	1.5956468032542488	0.004151666666666666
1.7568	0.35430000000000006	1.9248	3.6816	2.2791	189.0	48.0	1.912718204488778	0.0034616666666666667
2.2813	0.32889999999999975	1.8242	4.1055	2.1531	237.0	48.0	2.250575594781274	0.003443333333333333
1.8720999999999999	0.09429999999999983	1.9248	3.7969	2.0191	204.0	12.0	1.972620532003325	0.003768333333333333
2.0176	0.46819999999999995	1.7012	3.7188	2.1694	246.0	81.0	2.1859863625675993	0.0029666666666666665
1.3202999999999998	-0.1342000000000001	1.8242	3.1445	1.69	105.0	-15.0	1.7237693235390854	0.0054150000000000005
1.9034	0.07450000000000001	1.8857	3.7891	1.9602	210.0	12.0	2.0093864347457178	0.003315
1.6963000000000001	-0.00019999999999997797	1.9502	3.6465	1.95	153.0	9.0	1.8698082247974568	0.003981666666666666
1.5801	0.1431	1.8242	3.4043	1.9673	153.0	18.0	1.8661879179914482	0.00432
1.8886999999999998	0.13369999999999993	1.6914	3.5801	1.8251	183.0	18.0	2.116648929880572	0.004318333333333333
1.499	0.13890000000000002	1.8213	3.3203	1.9602	168.0	21.0	1.82303848899138	0.003563333333333333
2.1592000000000002	0.7137000000000002	1.5654	3.7246	2.2791	252.0	126.0	2.379327967292705	0.0029783333333333333
1.7207000000000001	0.39329999999999976	1.7598	3.4805	2.1531	210.0	54.0	1.9777815660870555	0.0036583333333333333
1.8261	0.22719999999999985	1.5938	3.4199	1.821	204.0	36.0	2.145752290124231	0.0035850000000000005
1.8662	0.2573000000000001	1.71	3.5762	1.9673	195.0	36.0	2.091345029239766	0.0038800000000000006
1.7881	0.1947000000000001	1.8213	3.6094	2.016	189.0	27.0	1.981771262285181	0.0039366666666666664
2.1289	0.32889999999999975	1.8242	3.9531	2.1531	153.0	36.0	2.16703212367065	0.00473
2.5565999999999995	0.661	1.9512	4.5078	2.6122	336.0	138.0	2.310270602706027	0.0021333333333333334
1.7910000000000004	0.26460000000000017	2.1445	3.9355	2.4091	126.0	24.0	1.835159710888319	0.005033333333333333
2.7207	0.1753	2.2988	5.0195	2.4741	168.0	15.0	2.1835305376718286	0.00519
1.4463	0.06910000000000016	1.626	3.0723	1.6951	183.0	12.0	1.8894833948339484	0.0035816666666666666
1.5029	0.19410000000000016	1.501	3.0039	1.6951	204.0	36.0	2.00126582278481	0.0033449999999999994
1.5625	0.20009999999999994	1.625	3.1875	1.8251	252.0	39.0	1.9615384615384615	0.002928333333333333
1.831	0.19910000000000005	1.626	3.457	1.8251	267.0	39.0	2.126076260762608	0.002921666666666667
1.5645	0.12959999999999994	1.6914	3.2559	1.821	141.0	18.0	1.9249733948208585	0.004436666666666667
1.9033000000000002	0.13000000000000012	1.626	3.5293	1.756	237.0	21.0	2.1705412054120545	0.0036799999999999997
1.4892	0.05630000000000002	1.8389	3.3281	1.8952	162.0	6.0	1.8098319647615422	0.004026666666666667
2.1689	0.2319	1.9131	4.082	2.145	216.0	30.0	2.1337096858501905	0.003871666666666667
1.7100000000000002	0.3067	1.9033	3.6133	2.21	252.0	51.0	1.8984395523564337	0.0029416666666666666
2.2695999999999996	0.3960999999999997	2.0312	4.3008	2.4273	210.0	48.0	2.1173690429302874	0.003616666666666667
1.9805	0.39390000000000014	1.8242	3.8047	2.2181	237.0	66.0	2.085681394583927	0.0029233333333333333
1.3182999999999998	-0.1665000000000001	2.084	3.4023	1.9175	162.0	15.0	1.632581573896353	0.0032333333333333337
2.0996	0.5983	1.7559	3.8555	2.3542	267.0	108.0	2.195740076314141	0.0027433333333333333
2.0811	0.4586999999999999	1.6904	3.7715	2.1491	210.0	57.0	2.231128726928538	0.004171666666666667
2.3535000000000004	0.06899999999999995	2.0801	4.4336	2.1491	372.0	15.0	2.131435988654392	0.0020283333333333334
1.5664000000000002	-0.16659999999999986	2.2832	3.8496	2.1166	204.0	-21.0	1.6860546601261388	0.0023866666666666667
1.7548	0.25	1.96	3.7148	2.21	273.0	48.0	1.8953061224489796	0.0024683333333333337
1.5077999999999998	0.06359999999999988	1.6914	3.1992	1.755	210.0	12.0	1.8914508691025185	0.003428333333333333
1.4941	0.05259999999999998	1.4434	2.9375	1.496	153.0	9.0	2.0351253983649715	0.004675
2.0566000000000004	0.33010000000000006	1.3711	3.4277	1.7012	237.0	57.0	2.4999635329297645	0.0037383333333333335
1.4960999999999998	-0.09739999999999993	1.7559	3.252	1.6585	126.0	-3.0	1.8520416880232358	0.004986666666666667
2.0263	0.27059999999999995	1.5596	3.5859	1.8302	216.0	42.0	2.299243395742498	0.00394
2.4082000000000003	0.13929999999999998	1.7559	4.1641	1.8952	483.0	42.0	2.3714904037815367	0.001805
1.6895	0.13369999999999993	1.6914	3.3809	1.8251	147.0	15.0	1.998876670214024	0.00498
1.7119000000000002	0.5993000000000002	1.7549	3.4668	2.3542	252.0	99.0	1.9754971793264575	0.0030049999999999994
2.0937	0.34030000000000005	1.7559	3.8496	2.0962	426.0	93.0	2.1923799760806424	0.001875
1.8955000000000002	0.2559	1.9541	3.8496	2.21	231.0	42.0	1.970011770124354	0.0028366666666666666
1.5565999999999998	0.06020000000000003	1.7598	3.3164	1.82	153.0	9.0	1.884532333219684	0.004293333333333334
1.3994	0.0686	1.5615	2.9609	1.6301	147.0	9.0	1.8961895613192443	0.004521666666666666
1.8536000000000001	0.3244	1.4316	3.2852	1.756	267.0	66.0	2.2947750768371056	0.0030583333333333335
1.6483999999999999	0.21189999999999998	1.6914	3.3398	1.9033	162.0	27.0	1.974577273264751	0.004356666666666667
1.9014000000000002	0.25870000000000015	1.8213	3.7227	2.08	147.0	30.0	2.0439795750288257	0.004628333333333333
1.7929000000000002	0.33330000000000015	1.8848	3.6777	2.2181	225.0	54.0	1.9512415110356538	0.0030716666666666666
2.2011999999999996	0.4253999999999998	2.0527	4.2539	2.4781	258.0	63.0	2.0723437423880737	0.0029499999999999995
4.7129	0.2582	2.3418	7.0547	2.6	603.0	69.0	3.0125117431035955	0.0015166666666666666
1.4979999999999998	0.0013999999999998458	2.4727	3.9707	2.4741	153.0	0.0	1.6058155053180732	0.0026666666666666666
1.8906	0.47520000000000007	2.0801	3.9707	2.5553	162.0	54.0	1.9088986106437191	0.0038800000000000006
1.5429000000000002	-0.0038000000000000256	1.7598	3.3027	1.756	183.0	-12.0	1.876747357654279	0.0037400000000000003
1.5761999999999998	0.07909999999999995	1.8242	3.4004	1.9033	195.0	12.0	1.8640499945181448	0.0031950000000000004
1.7607	0.3740999999999999	1.71	3.4707	2.0841	258.0	69.0	2.0296491228070175	0.002826666666666667
1.7832000000000001	0.1431	1.8242	3.6074	1.9673	183.0	21.0	1.977524394255016	0.0038183333333333333
1.8300999999999998	0.5280999999999998	1.625	3.4551	2.1531	252.0	99.0	2.1262153846153846	0.0028183333333333333
1.8691	0.36339999999999995	1.7207	3.5898	2.0841	294.0	75.0	2.0862439704771316	0.0025833333333333333
1.8358999999999999	0.3446	1.7598	3.5957	2.1044	252.0	63.0	2.0432435504034547	0.0027833333333333334
1.9043	0.17819999999999991	1.9668	3.8711	2.145	168.0	24.0	1.9682224933902785	0.003833333333333333
3.502	0.3235000000000001	2.0957	5.5977	2.4192	468.0	75.0	2.6710407023906093	0.00189
1.834	0.40359999999999996	2.0156	3.8496	2.4192	216.0	63.0	1.9099027584838262	0.0028683333333333334
1.5606	0.13359999999999994	2.0195	3.5801	2.1531	174.0	18.0	1.7727655360237684	0.0035533333333333337
2.0440000000000005	0.27160000000000006	1.8896	3.9336	2.1612	183.0	33.0	2.081710414902625	0.004063333333333333
1.5830000000000002	0.38560000000000016	1.5654	3.1484	1.951	216.0	63.0	2.011243132745624	0.0034766666666666665
1.8944999999999999	0.19069999999999987	1.6953	3.5898	1.886	195.0	27.0	2.1175013271987257	0.003988333333333333
1.9443	0.1845000000000001	1.8955	3.8398	2.08	210.0	27.0	2.0257451859667635	0.0034533333333333334
1.8241999999999998	0.2107000000000001	2.0156	3.8398	2.2263	204.0	30.0	1.9050406826751338	0.003355
1.8945	0.2539999999999998	1.8301	3.7246	2.0841	216.0	39.0	2.0351893339161795	0.0032316666666666665
1.5517999999999998	0.12859999999999983	1.8955	3.4473	2.0241	162.0	18.0	1.8186758111316275	0.0037966666666666665
1.6348	0.3926999999999998	1.6914	3.3262	2.0841	195.0	60.0	1.9665365969019748	0.0035433333333333337
1.499	0.39280000000000026	1.8213	3.3203	2.2141	246.0	84.0	1.82303848899138	0.0023383333333333333
1.7558999999999998	0.19900000000000007	1.4961	3.252	1.6951	237.0	36.0	2.1736514938840985	0.00336
1.9492	0.264	1.4961	3.4453	1.7601	195.0	39.0	2.30285408729363	0.004125
1.8398	0.26879999999999993	1.6914	3.5312	1.9602	174.0	33.0	2.087737968546766	0.004496666666666666
2.543	0.6569999999999998	1.4961	4.0391	2.1531	330.0	120.0	2.6997526903281868	0.003026666666666667
1.6231	0.0006999999999997009	2.0234	3.6465	2.0241	162.0	0.0	1.802164673322131	0.0038599999999999997
1.6045000000000003	0.13839999999999986	1.8857	3.4902	2.0241	147.0	18.0	1.8508776581640771	0.004015
2.3007999999999997	0.34560000000000013	1.7344	4.0352	2.08	216.0	45.0	2.3265682656826567	0.0039566666666666665
1.6855	0.13539999999999996	1.7598	3.4453	1.8952	189.0	21.0	1.9577792931014888	0.0036566666666666666
2.2236000000000002	0.4592000000000003	1.7549	3.9785	2.2141	294.0	81.0	2.267080745341615	0.0028183333333333333
1.9551000000000003	0.2559999999999998	2.084	4.0391	2.34	252.0	45.0	1.938147792706334	0.0025916666666666666
1.1993	-0.36429999999999985	2.0898	3.2891	1.7255	84.0	-57.0	1.5738826681979137	0.005166666666666667
1.7422	0.26350000000000007	1.4316	3.1738	1.6951	183.0	39.0	2.216960044705225	0.00433
1.5488999999999997	0.31309999999999993	1.4531	3.002	1.7662	210.0	57.0	2.065928015965866	0.0034583333333333332
1.8242	0.6449	1.3711	3.1953	2.016	237.0	102.0	2.330464590474801	0.00375
1.9766000000000001	0.5891	1.3711	3.3477	1.9602	210.0	90.0	2.441616220552841	0.00396
1.8262	0.2601	2.084	3.9102	2.3441	195.0	36.0	1.876295585412668	0.003365
1.8378999999999999	0.25939999999999985	2.0156	3.8535	2.275	126.0	24.0	1.9118376662036118	0.0047933333333333335
2.082	0.3943000000000001	1.8848	3.9668	2.2791	204.0	51.0	2.1046264855687604	0.003636666666666667
1.6299000000000001	0.07450000000000001	1.8857	3.5156	1.9602	141.0	9.0	1.864347457177706	0.004481666666666666
1.7773999999999999	0.38860000000000006	1.6914	3.4688	2.08	237.0	72.0	2.050845453470498	0.002831666666666667
1.9678000000000002	0.5151000000000001	1.6299	3.5977	2.145	300.0	111.0	2.2073133321062643	0.00245
2.1318	0.5052000000000001	1.8389	3.9707	2.3441	237.0	84.0	2.159280004350427	0.002935
2.3085999999999998	0.32940000000000014	2.0898	4.3984	2.4192	183.0	36.0	2.104699014259738	0.00401
1.5995999999999997	0.2648999999999999	2.1543	3.7539	2.4192	153.0	27.0	1.74251497005988	0.004136666666666667
1.8300999999999994	-0.7802000000000002	2.9902	4.8203	2.21	195.0	-105.0	1.6120326399571931	0.0022099999999999997
1.7753999999999999	-0.6584999999999999	2.4785	4.2539	1.82	147.0	-108.0	1.7163203550534598	0.0036516666666666663
1.6953	0.20379999999999976	1.8203	3.5156	2.0241	216.0	33.0	1.93133000054936	0.0032500000000000003
1.9512	0.33279999999999976	1.8203	3.7715	2.1531	183.0	45.0	2.0719112234247103	0.003821666666666667
1.7617	0.1431	1.8242	3.5859	1.9673	174.0	18.0	1.9657384058765486	0.004321666666666666
1.9248	0.12359999999999993	1.8955	3.8203	2.0191	147.0	15.0	2.0154576628857823	0.004186666666666667
2.08	0.32289999999999996	1.5723	3.6523	1.8952	231.0	45.0	2.3229027539273672	0.004088333333333334
1.8378999999999999	0.20999999999999996	1.9512	3.7891	2.1612	168.0	24.0	1.9419331693316932	0.004373333333333334
1.9316	0.5072999999999999	1.9668	3.8984	2.4741	183.0	57.0	1.9821029082774049	0.004123333333333334
1.7666	0.2541000000000002	1.96	3.7266	2.2141	174.0	33.0	1.9013265306122449	0.0037
2.2773999999999996	0.3247	2.0234	4.3008	2.3481	231.0	42.0	2.1255312839774634	0.0034516666666666667
2.2099	0.39680000000000026	1.8213	4.0312	2.2181	231.0	54.0	2.2133640806017683	0.0036083333333333336
1.9785000000000004	0.1990000000000003	2.0801	4.0586	2.2791	216.0	30.0	1.9511561944137303	0.002955
1.7168	0.1312000000000002	2.2129	3.9297	2.3441	153.0	15.0	1.7758145420037057	0.003663333333333333
1.5312999999999999	0.26750000000000007	2.0156	3.5469	2.2831	162.0	33.0	1.7597241516173843	0.00371
2.0792	0.32850000000000024	1.8896	3.9688	2.2181	258.0	54.0	2.1003386960203216	0.002903333333333333
1.9571	0.4586000000000001	2.0195	3.9766	2.4781	273.0	87.0	1.9691012626887845	0.0023733333333333336
2.7519	0.26800000000000024	2.0801	4.832	2.3481	309.0	48.0	2.3229652420556706	0.00246
1.5702999999999998	0.05589999999999984	1.8301	3.4004	1.886	189.0	9.0	1.8580405442325554	0.003291666666666667
1.5614999999999999	0.07020000000000004	1.7549	3.3164	1.8251	153.0	9.0	1.88979429027295	0.004403333333333333
1.5596	0.0038000000000000256	1.8213	3.3809	1.8251	168.0	0.0	1.8563114259045737	0.003786666666666667
1.7099000000000002	0.2667999999999999	1.8213	3.5312	2.0881	183.0	33.0	1.9388348981496735	0.004143333333333333
1.8115999999999999	0.32430000000000003	1.8857	3.6973	2.21	162.0	39.0	1.9607042477594527	0.004136666666666667
1.9405	0.49550000000000005	1.8486	3.7891	2.3441	210.0	69.0	2.0497132965487395	0.003481666666666667
1.2607	-0.00029999999999996696	1.8213	3.082	1.821	111.0	3.0	1.6921978806347115	0.00485
1.8926	0.5155000000000001	1.4355	3.3281	1.951	195.0	75.0	2.318425635667015	0.004103333333333333
1.9043	0.272	1.6953	3.5996	1.9673	210.0	36.0	2.123282014982599	0.004033333333333333
1.9004	0.06489999999999996	1.8242	3.7246	1.8891	210.0	9.0	2.041771735555312	0.0036716666666666664
1.626	0.06469999999999998	1.8213	3.4473	1.886	174.0	9.0	1.8927689013342117	0.004026666666666667
1.7607	0.32779999999999987	1.8213	3.582	2.1491	168.0	42.0	1.9667270630868061	0.004073333333333333
1.9581	0.6574	1.8857	3.8438	2.5431	195.0	78.0	2.0383942302593203	0.0038000000000000004
1.875	0.17289999999999983	1.4531	3.3281	1.626	189.0	24.0	2.2903447801252494	0.004521666666666666
1.5713	0.4575999999999998	1.5615	3.1328	2.0191	153.0	57.0	2.006276016650656	0.004426666666666667
1.8124999999999998	0.5239	1.5723	3.3848	2.0962	189.0	72.0	2.1527698276410354	0.004076666666666667
2.5322999999999998	0.7746	1.5654	4.0977	2.34	231.0	105.0	2.617669605212725	0.0037816666666666667
1.3056999999999999	-0.1632	1.8857	3.1914	1.7225	120.0	-30.0	1.6924219122872142	0.0044083333333333335
2.0342000000000002	0.32810000000000006	1.626	3.6602	1.9541	216.0	48.0	2.251045510455105	0.0038599999999999997
1.6894	0.3788	1.7012	3.3906	2.08	183.0	51.0	1.9930637197272514	0.00393
1.8378999999999999	0.45189999999999975	1.7012	3.5391	2.1531	204.0	60.0	2.080355043498707	0.003983333333333333
1.622	0.04610000000000003	1.8389	3.4609	1.885	120.0	3.0	1.8820490510631356	0.005528333333333333
1.7089999999999999	0.12339999999999995	1.6367	3.3457	1.7601	162.0	15.0	2.044174253070202	0.0048850000000000005
3.3867000000000003	0.13749999999999973	2.0156	5.4023	2.1531	792.0	69.0	2.680244096050804	0.0009733333333333334
2.166	0.5928	1.8203	3.9863	2.4131	252.0	90.0	2.18991375048069	0.00309
1.4101	0.0	1.7012	3.1113	1.7012	162.0	0.0	1.8288854925934634	0.0037833333333333334
1.7510000000000001	0.02300000000000013	1.8955	3.6465	1.9185	267.0	6.0	1.9237668161434978	0.002446666666666667
2.8379	0.08240000000000003	1.7559	4.5938	1.8383	573.0	27.0	2.616208212312774	0.0016416666666666665
1.8827999999999996	-0.7911000000000001	2.8711	4.7539	2.08	147.0	-66.0	1.655776531642924	0.003578333333333333
1.6796999999999995	-0.6502000000000001	2.4062	4.0859	1.756	105.0	-90.0	1.6980716482420413	0.005144999999999999
1.4139999999999997	-0.2732000000000001	2.1602	3.5742	1.887	99.0	-18.0	1.6545690213869084	0.005045000000000001
1.9678000000000002	0.4246000000000001	1.7549	3.7227	2.1795	183.0	54.0	2.1213174539859825	0.004123333333333334
1.7558	0.18359999999999999	1.5176	3.2734	1.7012	168.0	21.0	2.1569583552978386	0.00537
1.9316	0.2591000000000001	1.7559	3.6875	2.015	174.0	33.0	2.1000626459365566	0.0041783333333333325
1.9267999999999998	0.24760000000000004	1.8486	3.7754	2.0962	216.0	36.0	2.042302282808612	0.0034316666666666666
1.4970999999999999	0.19040000000000012	1.8896	3.3867	2.08	174.0	30.0	1.7922840812870449	0.0031666666666666666
1.7577999999999998	0.15700000000000003	1.6914	3.4492	1.8484	204.0	24.0	2.0392574198888496	0.003561666666666667
1.8232000000000002	0.1403000000000001	1.7549	3.5781	1.8952	189.0	21.0	2.0389195965582085	0.0039366666666666664
2.9364999999999997	0.3399000000000001	1.8213	4.7578	2.1612	225.0	42.0	2.612309888541152	0.004198333333333333
1.6475000000000002	0.06479999999999997	1.6455	3.293	1.7103	168.0	9.0	2.0012154360376786	0.004438333333333333
1.9989999999999999	0.12859999999999983	1.8955	3.8945	2.0241	162.0	15.0	2.0546030071221315	0.004383333333333334
2.2128999999999994	0.3495999999999999	1.8848	4.0977	2.2344	267.0	57.0	2.1740768251273344	0.002976666666666667
1.4531	-9.999999999976694e-05	2.0801	3.5332	2.08	132.0	-0.0	1.698572184029614	0.00432
1.6308999999999998	0.0037000000000000366	1.6914	3.3223	1.6951	195.0	0.0	1.9642308147097078	0.003568333333333334
1.7617	0.33640000000000003	1.7598	3.5215	2.0962	225.0	51.0	2.0010796681441074	0.0033883333333333335
1.7675999999999998	0.4628000000000001	1.8203	3.5879	2.2831	153.0	48.0	1.97104872823161	0.004741666666666667
1.4862999999999997	0.06509999999999994	1.8301	3.3164	1.8952	189.0	9.0	1.8121414130375388	0.00347
2.0332	0.2637999999999998	1.8203	3.8535	2.0841	204.0	33.0	2.11695874306433	0.003965
1.6094	0.13769999999999993	1.7656	3.375	1.9033	237.0	27.0	1.9115314907113727	0.0029366666666666664
3.5313	0.35529999999999995	1.8242	5.3555	2.1795	735.0	132.0	2.9358074772503016	0.0013566666666666666
1.3223000000000003	-0.6217999999999999	2.7363	4.0586	2.1145	90.0	-114.0	1.4832437963673575	0.0037599999999999995
1.9238000000000002	0.2849999999999999	1.6914	3.6152	1.9764	273.0	54.0	2.1374009696109733	0.002853333333333333
1.789	0.31899999999999973	1.8301	3.6191	2.1491	189.0	45.0	1.9775422108081524	0.003525
1.789	0.13929999999999976	1.8848	3.6738	2.0241	195.0	21.0	1.9491723259762308	0.0034266666666666664
1.5206000000000002	-0.0593999999999999	1.8896	3.4102	1.8302	132.0	-3.0	1.8047205757832347	0.0048133333333333335
1.7588	0.21870000000000012	1.8857	3.6445	2.1044	168.0	27.0	1.9327040356366336	0.0038583333333333334
1.5439	0.10670000000000002	1.7549	3.2988	1.8616	195.0	18.0	1.8797652287879651	0.0032333333333333337
1.5732000000000002	0.20340000000000003	1.5811	3.1543	1.7845	162.0	27.0	1.9950034785908546	0.004548333333333333
1.8906	0.46309999999999985	1.625	3.5156	2.0881	162.0	54.0	2.163446153846154	0.004671666666666667
1.8925999999999998	0.20799999999999996	1.6953	3.5879	1.9033	183.0	27.0	2.116380581607975	0.004173333333333334
2.0322	0.15510000000000002	1.8213	3.8535	1.9764	210.0	24.0	2.1157964091582935	0.0034033333333333333
2.1563	0.6616	2.0156	4.1719	2.6772	294.0	102.0	2.0698055169676524	0.0027633333333333334
1.373	0.07040000000000002	1.7598	3.1328	1.8302	216.0	15.0	1.7802022957154222	0.002826666666666667
2.9883	0.6412999999999998	1.5078	4.4961	2.1491	372.0	120.0	2.9818941504178276	0.0029366666666666664
3.9805	0.3635999999999999	1.3711	5.3516	1.7347	750.0	177.0	3.9031434614543072	0.00134
1.3379000000000003	-0.9133	2.7363	4.0742	1.823	90.0	-18.0	1.4889449256294998	0.004671666666666667
1.3857000000000002	-0.05369999999999986	1.7549	3.1406	1.7012	99.0	-45.0	1.7896176420308851	0.005838333333333333
1.8368999999999998	0.16239999999999988	1.4951	3.332	1.6575	225.0	30.0	2.228613470670858	0.00361
2.1465	0.20379999999999976	1.8203	3.9668	2.0241	204.0	30.0	2.1792012305663904	0.0036799999999999997
1.9668	0.0007999999999999119	1.9512	3.918	1.952	141.0	0.0	2.0079950799507995	0.005131666666666667
1.4326	0.001100000000000101	1.7549	3.1875	1.756	153.0	0.0	1.8163428115562141	0.0039033333333333333
1.626	0.38900000000000023	1.626	3.252	2.015	237.0	72.0	2.0	0.002946666666666667
1.3213	0.12960000000000016	1.6904	3.0117	1.82	162.0	18.0	1.7816493137718883	0.003961666666666667
2.3975	0.11050000000000004	1.6455	4.043	1.756	258.0	18.0	2.4570039501671226	0.0033833333333333332
2.0293	0.3330000000000002	2.0801	4.1094	2.4131	183.0	36.0	1.9755780972068653	0.004025
1.8710999999999998	0.1200000000000001	2.2891	4.1602	2.4091	153.0	12.0	1.8173954829408938	0.004293333333333334
1.6924000000000001	0.11159999999999992	1.7744	3.4668	1.886	237.0	21.0	1.9537871956717765	0.003051666666666667
1.2694999999999999	-0.09840000000000004	1.7559	3.0254	1.6575	132.0	-33.0	1.7229910587163277	0.004826666666666667
1.3672000000000002	0.13400000000000012	1.4961	2.8633	1.6301	204.0	21.0	1.9138426575763654	0.003945
1.7559	0.40670000000000006	1.4316	3.1875	1.8383	231.0	66.0	2.2265297569153395	0.0037766666666666665
1.9619	0.5190000000000001	1.626	3.5879	2.145	252.0	84.0	2.206580565805658	0.0033383333333333338
1.834	0.2757999999999998	1.7656	3.5996	2.0414	162.0	33.0	2.038740371545084	0.004240000000000001
1.9325999999999999	0.25680000000000014	1.7744	3.707	2.0312	141.0	27.0	2.089156898106402	0.004866666666666667
2.0449	0.34850000000000003	1.7559	3.8008	2.1044	216.0	51.0	2.1645879605900107	0.003506666666666667
1.3104999999999998	0.12880000000000003	1.9512	3.2617	2.08	120.0	15.0	1.6716379663796637	0.004383333333333334
1.8672	0.3868999999999998	1.7012	3.5684	2.0881	153.0	42.0	2.097578180108159	0.0048783333333333335
2.0947000000000005	0.3941999999999999	1.6299	3.7246	2.0241	216.0	51.0	2.2851708693784896	0.00413
1.3057	0.017100000000000115	1.9502	3.2559	1.9673	141.0	3.0	1.669521074761563	0.004431666666666667
1.5038999999999998	0.2587999999999999	1.6953	3.1992	1.9541	174.0	39.0	1.8870996283843566	0.0037766666666666665
1.5644	0.0028999999999999027	1.9512	3.5156	1.9541	153.0	0.0	1.8017630176301762	0.003923333333333333
1.7042	0.14160000000000017	1.8896	3.5938	2.0312	195.0	24.0	1.9018839966130399	0.0031666666666666666
1.8437000000000001	0.13319999999999999	1.7559	3.5996	1.8891	189.0	21.0	2.050002847542571	0.003636666666666667
1.7705000000000002	0.08390000000000009	1.6904	3.4609	1.7743	168.0	12.0	2.0473852342640795	0.004471666666666666
1.7530000000000001	0.15510000000000002	1.5654	3.3184	1.7205	204.0	24.0	2.1198415740385843	0.0037950000000000006
1.54	-0.049699999999999855	1.626	3.166	1.5763	174.0	-18.0	1.947109471094711	0.004125
1.8301	0.09799999999999986	1.6367	3.4668	1.7347	204.0	15.0	2.118164599498992	0.004008333333333333
2.165	0.534	1.6455	3.8105	2.1795	216.0	69.0	2.315709510786995	0.004011666666666667
1.7969	0.12729999999999997	1.8613	3.6582	1.9886	141.0	15.0	1.9654005265137269	0.0048
2.0811	0.2579	1.9033	3.9844	2.1612	174.0	30.0	2.0934166973151895	0.004375
1.6504	0.1644000000000001	1.4961	3.1465	1.6605	225.0	33.0	2.103134817191364	0.00328
1.7617999999999998	0.0717000000000001	1.4355	3.1973	1.5072	195.0	12.0	2.2273075583420407	0.004085
1.4188999999999998	0.15069999999999983	1.5596	2.9785	1.7103	132.0	15.0	1.9097845601436263	0.005861666666666667
2.2246	0.5886	1.3066	3.5312	1.8952	288.0	111.0	2.7025868666768713	0.003353333333333333
1.3955000000000002	-0.14640000000000009	1.7744	3.1699	1.628	111.0	-18.0	1.7864630297565376	0.005306666666666667
1.2539	-0.19379999999999997	1.8848	3.1387	1.691	111.0	-33.0	1.6652695246179967	0.004535
2.542	0.33740000000000014	1.6299	4.1719	1.9673	210.0	42.0	2.5596048837351986	0.004505
1.4745999999999997	-0.34540000000000015	2.1055	3.5801	1.7601	99.0	-39.0	1.7003562099263831	0.0060283333333333335
1.4355	-0.22730000000000006	1.8848	3.3203	1.6575	99.0	-24.0	1.7616192699490663	0.005968333333333333
1.7119	0.3244999999999998	1.5615	3.2734	1.886	147.0	36.0	2.0963176432917066	0.005325
2.1054	0.2589999999999999	1.7012	3.8066	1.9602	237.0	39.0	2.237596990359746	0.003636666666666667
2.0293	0.3224	1.9668	3.9961	2.2892	216.0	48.0	2.0317775066097212	0.003246666666666667
1.4306999999999999	-0.062000000000000055	1.9541	3.3848	1.8921	99.0	-15.0	1.7321529092676935	0.005223333333333333
2.5342000000000002	0.3861000000000001	1.6299	4.1641	2.016	216.0	48.0	2.554819314068348	0.0045383333333333335
1.7597	0.06490000000000018	2.0801	3.8398	2.145	195.0	9.0	1.845968943800779	0.0030583333333333335
2.4649	0.4513999999999998	1.6367	4.1016	2.0881	393.0	99.0	2.5060182073684856	0.002465
1.7460999999999998	0.06509999999999971	2.084	3.8301	2.1491	183.0	9.0	1.8378598848368521	0.003303333333333333
1.4356	-0.007100000000000328	2.0312	3.4668	2.0241	132.0	18.0	1.7067743205986607	0.00402
1.7412	0.05620000000000003	1.71	3.4512	1.7662	204.0	9.0	2.018245614035088	0.003433333333333333
1.8252000000000002	0.18909999999999982	1.96	3.7852	2.1491	168.0	24.0	1.9312244897959185	0.003951666666666667
1.7578	0.060699999999999754	2.0234	3.7812	2.0841	153.0	6.0	1.8687357912424631	0.004421666666666666
2.1016000000000004	0.3285	2.0156	4.1172	2.3441	246.0	51.0	2.042667195872197	0.003008333333333333
2.0508	0.15910000000000002	2.1484	4.1992	2.3075	189.0	21.0	1.954570843418358	0.00352
3.7041000000000004	0.21050000000000013	1.8857	5.5898	2.0962	735.0	87.0	2.9643103356843614	0.0011966666666666668
1.0996000000000001	-0.8026	2.8867	3.9863	2.0841	90.0	-72.0	1.380919388921606	0.0037383333333333335
2.5576	0.017000000000000126	1.8213	4.3789	1.8383	393.0	3.0	2.4042716740789545	0.0021
2.082	-0.36529999999999996	2.2188	4.3008	1.8535	315.0	-54.0	1.9383450513791238	0.0019683333333333332
1.6854999999999998	-0.45620000000000016	2.1543	3.8398	1.6981	111.0	-99.0	1.7823887109501926	0.005208333333333333
1.2597	-0.19320000000000004	1.9512	3.2109	1.758	111.0	-18.0	1.6456027060270604	0.004896666666666667
1.6348	0.06869999999999998	1.6914	3.3262	1.7601	183.0	9.0	1.9665365969019748	0.0038500000000000006
1.6602	0.006000000000000005	1.8242	3.4844	1.8302	147.0	0.0	1.9100975770200634	0.004746666666666667
1.4872999999999998	-0.1169	1.7744	3.2617	1.6575	132.0	-21.0	1.838198827772768	0.005091666666666666
2.0235	0.27590000000000003	1.8203	3.8438	2.0962	246.0	42.0	2.1116299511069605	0.00345
1.4316	-0.32589999999999986	2.2129	3.6445	1.887	168.0	-33.0	1.6469338876587285	0.003313333333333333
2.0928000000000004	0.34709999999999996	1.9502	4.043	2.2973	231.0	48.0	2.07312070556866	0.003355
1.9784999999999995	0.2648999999999999	2.1543	4.1328	2.4192	174.0	30.0	1.918395766606322	0.003745
2.7030999999999996	0.367	2.1172	4.8203	2.4842	246.0	51.0	2.2767334215000945	0.0031633333333333335
1.5137	-0.5523999999999998	2.2129	3.7266	1.6605	204.0	-84.0	1.6840345248316688	0.0026033333333333334
1.3575	-0.18510000000000004	2.0234	3.3809	1.8383	225.0	-9.0	1.6709004645645942	0.0027266666666666663
1.7226000000000001	0.20329999999999981	1.8848	3.6074	2.0881	246.0	36.0	1.9139431239388796	0.002845
1.7246000000000001	0.15650000000000008	1.7559	3.4805	1.9124	210.0	27.0	1.9821743835070336	0.0033433333333333336
1.8301	0.2849999999999999	1.6914	3.5215	1.9764	195.0	39.0	2.0820030743762565	0.003946666666666667
1.498	0.2579999999999998	1.8301	3.3281	2.0881	210.0	45.0	1.8185345063111304	0.002965
1.8691	0.1371	1.7012	3.5703	1.8383	273.0	27.0	2.098695038796144	0.0029516666666666667
1.8858	0.30049999999999977	1.8486	3.7344	2.1491	237.0	51.0	2.0201233365790325	0.0030233333333333336
1.6455000000000002	0.06409999999999982	1.96	3.6055	2.0241	174.0	9.0	1.8395408163265308	0.0036300000000000004
1.7559	0.4213	1.6953	3.4512	2.1166	216.0	66.0	2.0357458856839497	0.0033316666666666664
2.0918	0.5390999999999999	1.9512	4.043	2.4903	231.0	72.0	2.072058220582206	0.0033583333333333334
1.8203	0.08240000000000003	1.7559	3.5762	1.8383	183.0	12.0	2.036676348311407	0.00378
2.4921999999999995	0.26750000000000007	2.0156	4.5078	2.2831	414.0	81.0	2.2364556459615	0.0015416666666666667
1.1601999999999997	-0.5948000000000002	2.4199	3.5801	1.8251	153.0	-27.0	1.4794412992272405	0.0025700000000000002
1.7596999999999998	0.26429999999999976	1.7598	3.5195	2.0241	279.0	57.0	1.9999431753608363	0.0024783333333333333
2.2081	0.5296000000000001	1.8896	4.0977	2.4192	267.0	96.0	2.1685541913632513	0.0025966666666666664
2.9736000000000002	0.30800000000000005	1.5811	4.5547	1.8891	420.0	69.0	2.8807159572449565	0.0025616666666666665
1.5117000000000003	-0.24719999999999986	2.2988	3.8105	2.0516	147.0	-48.0	1.6576039672872804	0.0035549999999999996
1.8378000000000003	0.2948000000000002	1.7852	3.623	2.08	174.0	39.0	2.0294644857719026	0.003935
1.6952999999999998	0.4101999999999999	1.8242	3.5195	2.2344	183.0	57.0	1.9293388882797937	0.0034683333333333337
2.0263999999999998	0.33499999999999996	1.3662	3.3926	1.7012	294.0	66.0	2.4832381788903524	0.0032649999999999997
1.4473	0.0037000000000000366	1.6914	3.1387	1.6951	153.0	0.0	1.8556816838122265	0.004555
1.9658	0.5313000000000001	1.6299	3.5957	2.1612	204.0	72.0	2.206086262960918	0.003941666666666666
2.1191999999999998	0.5135000000000001	1.7656	3.8848	2.2791	258.0	84.0	2.2002718622564568	0.0030166666666666666
2.1992	-0.3138000000000001	2.3633	4.5625	2.0495	141.0	-33.0	1.9305631955316718	0.004176666666666666
1.706	0.28310000000000013	1.8213	3.5273	2.1044	183.0	42.0	1.936693570526547	0.0035
2.3467000000000002	0.4448000000000001	1.9033	4.25	2.3481	246.0	57.0	2.2329637997162823	0.0036083333333333336
1.5176000000000003	-9.999999999976694e-05	2.0801	3.5977	2.08	147.0	-27.0	1.729580308639008	0.0037733333333333334
1.7382999999999997	0.08000000000000007	1.9512	3.6895	2.0312	141.0	9.0	1.8908876588765886	0.0047333333333333324
1.8291	0.0132000000000001	1.9541	3.7832	1.9673	216.0	3.0	1.9360319328591167	0.0031000000000000003
1.8887	0.13779999999999992	2.0234	3.9121	2.1612	294.0	27.0	1.933428882079668	0.0024016666666666665
1.1075	-0.3909	2.2109	3.3184	1.82	162.0	-51.0	1.5009272242073364	0.002501666666666667
2.2295	0.5878000000000001	1.8213	4.0508	2.4091	351.0	126.0	2.22412562455389	0.0022433333333333333
1.5605	0.08250000000000002	1.8848	3.4453	1.9673	252.0	18.0	1.8279393039049237	0.002581666666666667
2.5635	0.26370000000000005	1.6904	4.2539	1.9541	426.0	60.0	2.51650496923805	0.0024316666666666666
2.2773999999999996	-0.16239999999999988	2.2109	4.4883	2.0485	309.0	-63.0	2.0300782486770093	0.0020083333333333333
1.1825999999999999	-0.22649999999999992	1.9541	3.1367	1.7276	111.0	-87.0	1.6051890896064684	0.004046666666666666
1.5682999999999998	0.07289999999999974	1.9512	3.5195	2.0241	153.0	9.0	1.803761787617876	0.004135
2.418	0.5889	1.8242	4.2422	2.4131	279.0	102.0	2.325512553448087	0.00277
1.6406	0.01880000000000015	2.0957	3.7363	2.1145	162.0	3.0	1.7828410554945842	0.003683333333333333
2.6367000000000003	0.40359999999999996	2.0156	4.6523	2.4192	447.0	93.0	2.308146457630482	0.0019916666666666663
1.9550999999999998	0.3409	1.8203	3.7754	2.1612	330.0	81.0	2.07405372740757	0.0021283333333333336
1.3681999999999999	-0.19809999999999994	1.9541	3.3223	1.756	141.0	-21.0	1.700168875697252	0.003915
2.4102000000000006	0.5917000000000001	1.6914	4.1016	2.2831	273.0	87.0	2.4249733948208587	0.0034116666666666666
1.7422	0.11949999999999994	2.2246	3.9668	2.3441	141.0	12.0	1.783152027330756	0.004128333333333334
2.2089999999999996	0.5329999999999999	1.9512	4.1602	2.4842	183.0	57.0	2.132123821238212	0.00421
1.7129000000000003	0.08110000000000017	2.0801	3.793	2.1612	147.0	9.0	1.8234700254795444	0.00407
1.4316999999999998	-0.22510000000000008	2.0156	3.4473	1.7905	126.0	-36.0	1.7103095852351655	0.004448333333333334
1.5214999999999999	0.19690000000000007	1.4961	3.0176	1.693	147.0	30.0	2.0169774747677294	0.004281666666666667
1.8086	0.4212	1.5176	3.3262	1.9388	204.0	66.0	2.1917501317870323	0.0037366666666666668
1.7685	0.3294999999999999	1.5596	3.3281	1.8891	168.0	42.0	2.1339446011797896	0.004433333333333333
2.1592	0.244	1.5303	3.6895	1.7743	258.0	48.0	2.4109651702280597	0.0030866666666666664
0.8789	-0.4435	1.9395	2.8184	1.496	69.0	-42.0	1.4531580304202114	0.005291666666666667
1.5761999999999998	0.3074999999999999	1.5176	3.0938	1.8251	216.0	51.0	2.0386136004217184	0.0035183333333333334
1.7627000000000002	0.5790000000000002	1.501	3.2637	2.08	246.0	105.0	2.174350433044637	0.0031466666666666665
1.9277	0.15260000000000007	1.7598	3.6875	1.9124	237.0	27.0	2.0954085691555857	0.003008333333333333
2.1620999999999997	0.5294000000000001	1.7598	3.9219	2.2892	225.0	72.0	2.2286055233549265	0.0037133333333333337
1.9512	0.2149000000000001	2.0195	3.9707	2.2344	183.0	27.0	1.9661797474622433	0.0035716666666666666
1.7207000000000003	0.08930000000000016	2.0801	3.8008	2.1694	168.0	12.0	1.8272198451997503	0.00347
1.6953	0.26290000000000013	1.9512	3.6465	2.2141	189.0	39.0	1.868849938499385	0.0031816666666666664
1.8486	0.1484000000000001	1.7549	3.6035	1.9033	189.0	21.0	2.053393355746766	0.004118333333333333
1.8691	0.1846000000000001	1.9766	3.8457	2.1612	153.0	24.0	1.945613680056663	0.0037750000000000006
1.7637	-0.06150000000000011	2.0156	3.7793	1.9541	267.0	-9.0	1.875024806509228	0.002358333333333333
1.6729000000000003	0.20890000000000009	1.5654	3.2383	1.7743	183.0	30.0	2.068672543758784	0.004243333333333333
2.0879	0.32509999999999994	2.084	4.1719	2.4091	309.0	60.0	2.0018714011516314	0.002358333333333333
2.2285	-0.00039999999999995595	2.2754	4.5039	2.275	393.0	24.0	1.9793882394304299	0.00152
1.6230000000000002	-0.3607	2.4082	4.0312	2.0475	141.0	-6.0	1.6739473465659	0.0037550000000000005
1.541	-0.4514	2.1465	3.6875	1.6951	105.0	-48.0	1.7179128814348938	0.005121666666666667
1.8164	0.2668999999999999	1.5176	3.334	1.7845	258.0	54.0	2.1968898260411174	0.0029733333333333335
1.6953	0.07620000000000005	1.625	3.3203	1.7012	168.0	9.0	2.0432615384615387	0.0044466666666666665
1.1933000000000002	-0.7445999999999999	2.6641	3.8574	1.9195	90.0	-144.0	1.4479186216733608	0.004171666666666667
1.6299000000000001	0.0	1.626	3.2559	1.626	174.0	0.0	2.00239852398524	0.004051666666666667
2.0254	0.2702	1.625	3.6504	1.8952	225.0	45.0	2.2464	0.00338
2.0078	0.2589999999999999	2.1602	4.168	2.4192	252.0	45.0	1.929450976761411	0.0025599999999999998
1.6894999999999998	0.22409999999999997	2.1484	3.8379	2.3725	204.0	33.0	1.786399180785701	0.0029483333333333336
1.5527000000000002	-0.00019999999999997797	2.1797	3.7324	2.1795	183.0	36.0	1.7123457356516953	0.002785
2.0743	0.3818999999999999	2.0312	4.1055	2.4131	315.0	87.0	2.0212189838519103	0.0019983333333333337
1.9599	0.4592000000000003	1.7549	3.7148	2.2141	168.0	54.0	2.1168157729785175	0.004375
2.3633	0.1296999999999997	2.0234	4.3867	2.1531	225.0	18.0	2.1679845804092124	0.00349
1.7421000000000002	-0.49649999999999994	2.2891	4.0312	1.7926	183.0	-60.0	1.7610414573413133	0.0030216666666666664
1.4647999999999999	-0.0015000000000000568	2.1465	3.6113	2.145	147.0	27.0	1.6824132308409037	0.00358
1.9600000000000002	0.3935000000000002	1.8896	3.8496	2.2831	216.0	57.0	2.037256562235394	0.003303333333333333
1.83	0.2326999999999999	1.7559	3.5859	1.9886	273.0	45.0	2.0422005808986845	0.0028466666666666666
1.9043	0.2841	1.8203	3.7246	2.1044	246.0	45.0	2.04614623963083	0.0031733333333333336
1.6307999999999998	0.08000000000000007	1.9512	3.582	2.0312	153.0	9.0	1.8357933579335792	0.004115
1.9131	0.28370000000000006	1.8857	3.7988	2.1694	168.0	36.0	2.01453041310919	0.0038933333333333337
1.9814999999999998	0.28400000000000003	1.8955	3.877	2.1795	216.0	39.0	2.0453706146135584	0.003483333333333333
1.9588999999999999	0.29669999999999996	1.7559	3.7148	2.0526	195.0	39.0	2.115610228372914	0.0040416666666666665
1.6308	-0.02320000000000011	1.8848	3.5156	1.8616	225.0	-9.0	1.865237691001698	0.00323
1.7227	0.23320000000000007	1.6914	3.4141	1.9246	183.0	33.0	2.0185053801584485	0.00394
1.6777	0.1866000000000001	1.3145	2.9922	1.5011	174.0	27.0	2.2763027767211867	0.004791666666666666
2.0977	0.4717	1.4316	3.5293	1.9033	246.0	75.0	2.4652835987706063	0.00381
1.6944	0.0034000000000000696	1.8857	3.5801	1.8891	147.0	0.0	1.8985522617595587	0.00455
2.0303000000000004	0.4592000000000003	1.7549	3.7852	2.2141	189.0	54.0	2.156932018918457	0.004278333333333334
1.7237000000000002	0.20660000000000012	1.8896	3.6133	2.0962	189.0	27.0	1.9122036409822185	0.0037433333333333338
2.1514000000000006	0.6458999999999999	1.9033	4.0547	2.5492	174.0	75.0	2.1303525455787318	0.0039499999999999995
1.7772999999999999	0.32410000000000005	1.7559	3.5332	2.08	216.0	51.0	2.012187482202859	0.003305
1.7021999999999997	0.135	1.4951	3.1973	1.6301	231.0	27.0	2.1385191625978193	0.003273333333333333
2.1484	0.3281999999999998	1.7559	3.9043	2.0841	330.0	72.0	2.2235320918047727	0.002353333333333333
1.4892999999999998	0.05689999999999995	1.9033	3.3926	1.9602	141.0	6.0	1.7824830557452844	0.004088333333333334
1.6191000000000002	-0.044300000000000006	1.9395	3.5586	1.8952	141.0	-15.0	1.834802784222738	0.004621666666666666
1.4463	0.05580000000000007	1.7744	3.2207	1.8302	141.0	6.0	1.8150924256086565	0.004648333333333333
1.9950999999999999	0.17090000000000005	1.5303	3.5254	1.7012	195.0	24.0	2.303731294517415	0.004315
1.7635999999999998	0.129	1.7012	3.4648	1.8302	195.0	18.0	2.036679990594874	0.004003333333333334
1.6865	0.11159999999999992	1.7744	3.4609	1.886	183.0	15.0	1.9504621280432823	0.004151666666666666
1.8369	0.5186999999999999	1.5654	3.4023	2.0841	183.0	75.0	2.173438098888463	0.0038199999999999996
1.0372	-0.37270000000000003	2.0312	3.0684	1.6585	90.0	-48.0	1.5106341079165024	0.004855
2.0058999999999996	0.4595	1.6367	3.6426	2.0962	210.0	66.0	2.2255758538522636	0.0038116666666666663
1.6377000000000002	0.32920000000000016	1.501	3.1387	1.8302	294.0	93.0	2.091072618254497	0.0021433333333333335
2.1045	0.14440000000000008	1.6299	3.7344	1.7743	279.0	27.0	2.2911835081906866	0.0032316666666666665
1.3135	-0.2206999999999999	1.8213	3.1348	1.6006	153.0	-27.0	1.7211881623016527	0.0035299999999999997
2.2920000000000003	0.22240000000000015	1.626	3.918	1.8484	225.0	33.0	2.40959409594096	0.004018333333333334
0.9609000000000001	-0.4926999999999999	2.2832	3.2441	1.7905	132.0	-84.0	1.4208566923615977	0.0033500000000000005
2.5117000000000003	0.05569999999999986	2.1055	4.6172	2.1612	189.0	6.0	2.1929232961291856	0.00445
1.5078999999999998	-0.2592000000000003	2.4062	3.9141	2.147	168.0	-30.0	1.6266727620314188	0.0031000000000000003
1.6328	0.0040999999999997705	2.084	3.7168	2.0881	267.0	0.0	1.783493282149712	0.0022099999999999997
1.7558000000000002	0.20910000000000029	2.0801	3.8359	2.2892	189.0	30.0	1.8440940339406762	0.00309
2.3711	0.4746999999999999	2.0156	4.3867	2.4903	267.0	75.0	2.1763742806112325	0.002845
2.2832	0.45799999999999996	1.4961	3.7793	1.9541	246.0	72.0	2.5261011964440883	0.003768333333333333
1.8819000000000001	0.1944999999999999	1.8896	3.7715	2.0841	237.0	33.0	1.995925063505504	0.0029600000000000004
2.2401999999999997	0.2849999999999999	1.6914	3.9316	1.9764	258.0	45.0	2.3244649402861532	0.0034383333333333336
1.5508000000000002	0.13359999999999994	2.0195	3.5703	2.1531	183.0	18.0	1.7679128497152763	0.003381666666666667
2.4707	0.13490000000000002	2.1543	4.625	2.2892	342.0	30.0	2.146869052592489	0.00201
1.1797	-0.5251000000000001	2.4121	3.5918	1.887	132.0	-63.0	1.4890759089589984	0.0030299999999999997
1.5663999999999998	0.0351999999999999	1.8203	3.3867	1.8555	195.0	6.0	1.8605174971158598	0.003375
1.7744	0.15850000000000009	1.626	3.4004	1.7845	204.0	27.0	2.0912669126691266	0.00358
1.5635	0.032500000000000195	1.626	3.1895	1.6585	153.0	6.0	1.9615621156211562	0.004376666666666667
1.8857000000000002	0.1302000000000001	1.6299	3.5156	1.7601	195.0	18.0	2.156942143689797	0.0041849999999999995
2.0839	0.26819999999999977	1.7559	3.8398	2.0241	237.0	45.0	2.18679879264195	0.0031283333333333332
1.8720999999999999	0.3108000000000002	1.9033	3.7754	2.2141	183.0	42.0	1.9836074186938475	0.0036349999999999998
1.875	0.26290000000000013	1.9512	3.8262	2.2141	210.0	36.0	1.9609471094710946	0.003371666666666667
1.5801	-0.035700000000000065	1.8242	3.4043	1.7885	132.0	-30.0	1.8661879179914482	0.004548333333333333
1.6913999999999998	0.19989999999999997	1.6953	3.3867	1.8952	174.0	27.0	1.9976995222084586	0.004121666666666667
1.5752000000000002	0.34130000000000016	1.626	3.2012	1.9673	168.0	45.0	1.968757687576876	0.004136666666666667
1.6855999999999998	0.1935	1.6367	3.3223	1.8302	168.0	24.0	2.0298771919105514	0.004411666666666667
2.0214	0.3242999999999998	1.7598	3.7812	2.0841	210.0	45.0	2.148653256051824	0.0037950000000000006
1.4569999999999999	-0.2268000000000001	1.8203	3.2773	1.5935	120.0	-111.0	1.8004175135966598	0.004373333333333334
1.3731	-0.0495000000000001	1.4531	2.8262	1.4036	132.0	-21.0	1.9449452893813226	0.004986666666666667
1.8163999999999998	0.3942999999999999	1.3262	3.1426	1.7205	267.0	84.0	2.3696275071633237	0.003103333333333334
1.8203	0.3359000000000001	1.6953	3.5156	2.0312	216.0	48.0	2.073733262549401	0.0038866666666666667
1.8213000000000001	-0.04689999999999994	1.9502	3.7715	1.9033	183.0	-9.0	1.9339042149523127	0.003991666666666667
1.875	0.12959999999999994	1.7656	3.6406	1.8952	174.0	15.0	2.061961939284096	0.004404999999999999
1.6777	0.06620000000000004	1.8848	3.5625	1.951	183.0	9.0	1.8901209677419355	0.0037550000000000005
1.5097999999999998	0.1391	1.75	3.2598	1.8891	195.0	18.0	1.862742857142857	0.00405
1.9569999999999999	0.3359000000000001	1.6953	3.6523	2.0312	258.0	57.0	2.1543679584734265	0.003115
1.3008000000000002	-0.28959999999999986	2.0801	3.3809	1.7905	141.0	-18.0	1.6253545502620068	0.0039183333333333336
2.3926000000000003	0.27829999999999977	2.084	4.4766	2.3623	246.0	45.0	2.148080614203455	0.0027933333333333334
1.9033	0.2825000000000002	1.6299	3.5332	1.9124	195.0	39.0	2.167740352168845	0.004096666666666666
2.0811	0.3298000000000001	1.5654	3.6465	1.8952	237.0	66.0	2.3294365657339977	0.002895
1.5155999999999998	-0.1261000000000001	1.8242	3.3398	1.6981	132.0	30.0	1.8308299528560463	0.004473333333333334
2.0694	0.12970000000000015	1.5654	3.6348	1.6951	195.0	18.0	2.3219624377156	0.004791666666666666
2.1064999999999996	0.1277999999999999	1.8486	3.9551	1.9764	189.0	18.0	2.139510981283133	0.0036766666666666666
3.3270999999999997	0.14600000000000013	1.8213	5.1484	1.9673	426.0	33.0	2.826772085872728	0.002316666666666667
1.8291	0.14210000000000012	1.9541	3.7832	2.0962	258.0	24.0	1.9360319328591167	0.0028399999999999996
1.8574000000000002	0.27410000000000023	2.0801	3.9375	2.3542	225.0	39.0	1.892937839526946	0.003108333333333333
1.8125	0.27249999999999996	2.0898	3.9023	2.3623	183.0	36.0	1.867307876351804	0.0035100000000000005
1.3828	0.0806	2.0156	3.3984	2.0962	132.0	9.0	1.6860488192101608	0.004473333333333334
3.1084000000000005	0.20110000000000006	1.9033	5.0117	2.1044	258.0	27.0	2.6331634529501393	0.0037616666666666666
1.6895	-0.03390000000000004	1.6914	3.3809	1.6575	153.0	-3.0	1.998876670214024	0.00446
1.3056999999999999	-0.000500000000000167	1.5615	2.8672	1.561	105.0	-18.0	1.836183157220621	0.005611666666666666
1.6913999999999998	0.13349999999999973	2.0156	3.707	2.1491	237.0	24.0	1.839154594165509	0.0027649999999999997
1.7099	9.999999999998899e-05	1.7549	3.4648	1.755	168.0	0.0	1.9743575132486182	0.004183333333333333
1.6377	-0.06489999999999996	1.7549	3.3926	1.69	153.0	-12.0	1.9332155678386234	0.004393333333333333
1.5116999999999998	0.14739999999999998	1.7559	3.2676	1.9033	189.0	24.0	1.8609260208440115	0.0035133333333333336
1.4511000000000003	-0.5200999999999998	2.0801	3.5312	1.56	126.0	-72.0	1.697610691793664	0.0046366666666666665
1.8574000000000002	-0.022199999999999998	1.7559	3.6133	1.7337	132.0	-15.0	2.0578051141864573	0.005178333333333333
1.4316999999999998	0.03139999999999965	2.0527	3.4844	2.0841	183.0	3.0	1.6974716227407802	0.003901666666666667
2.9638000000000004	0.2773000000000001	1.626	4.5898	1.9033	309.0	48.0	2.822755227552276	0.003191666666666667
1.4920999999999998	-0.3047000000000002	2.1602	3.6523	1.8555	99.0	-48.0	1.6907230811961853	0.005248333333333333
1.7655999999999998	0.33109999999999995	1.8301	3.5957	2.1612	153.0	39.0	1.9647560242609692	0.004395
2.2217000000000002	0.4385999999999999	1.6455	3.8672	2.0841	210.0	57.0	2.350167122455181	0.004118333333333333
1.626	0.0	1.9541	3.5801	1.9541	126.0	0.0	1.8320966173686095	0.005338333333333333
2.5166000000000004	0.6007	1.8896	4.4062	2.4903	189.0	66.0	2.3318162574089754	0.0041800000000000006
1.5557000000000003	0.1947000000000001	1.5654	3.1211	1.7601	147.0	27.0	1.993803500702696	0.004425
1.6904000000000001	0.21519999999999984	1.4951	3.1855	1.7103	195.0	36.0	2.1306267139321786	0.0038616666666666665
2.2832000000000003	0.006599999999999717	2.1465	4.4297	2.1531	288.0	0.0	2.0636850687165156	0.0022833333333333334
1.3779000000000001	0.1403000000000001	1.7549	3.1328	1.8952	168.0	21.0	1.785172944327312	0.0036966666666666667
1.9737	0.1944999999999999	1.5615	3.5352	1.756	267.0	42.0	2.2639769452449565	0.0028766666666666667
1.5439	0.14139999999999997	1.5811	3.125	1.7225	168.0	21.0	1.9764720764025046	0.0038583333333333334
1.4365	0.06410000000000005	1.501	2.9375	1.5651	162.0	9.0	1.9570286475682879	0.00409
2.0293	0.3951	1.3711	3.4004	1.7662	225.0	63.0	2.480052512581139	0.003998333333333334
1.5791	0.3336999999999999	1.5615	3.1406	1.8952	126.0	36.0	2.011271213576689	0.005531666666666666
2.0839999999999996	-0.04610000000000003	1.6914	3.7754	1.6453	300.0	21.0	2.2321154073548537	0.0030183333333333334
2.0225	-0.05889999999999995	1.9541	3.9766	1.8952	252.0	-33.0	2.0350033263394915	0.0028983333333333335
1.6465	-0.9025000000000001	2.0156	3.6621	1.1131	111.0	-207.0	1.8168783488787459	0.004993333333333333
1.0312000000000001	-0.7247000000000001	1.9668	2.998	1.2421	78.0	-69.0	1.524303437055115	0.006023333333333334
2.4414	0.2971999999999999	1.6914	4.1328	1.9886	210.0	36.0	2.443419652358992	0.0046433333333333335
1.7461	0.2579999999999998	1.8301	3.5762	2.0881	174.0	30.0	1.9541008688049832	0.00454
1.7256	-0.04739999999999989	1.8857	3.6113	1.8383	153.0	-21.0	1.9150978416503155	0.004353333333333333
1.7627	0.16300000000000003	1.8896	3.6523	2.0526	189.0	24.0	1.9328429297205758	0.0036033333333333334
2.087	0.41159999999999997	1.8857	3.9727	2.2973	342.0	78.0	2.106750808718248	0.002495
1.6543	0.20970000000000022	2.1445	3.7988	2.3542	147.0	24.0	1.7714152483096295	0.0038633333333333336
1.2910999999999997	-0.20820000000000016	2.0312	3.3223	1.823	120.0	-24.0	1.6356341079165024	0.00417
2.4023999999999996	0.32379999999999987	1.6953	4.0977	2.0191	309.0	57.0	2.4170943195894528	0.0031166666666666665
1.7597	-0.1036999999999999	2.0801	3.8398	1.9764	189.0	-36.0	1.845968943800779	0.003601666666666666
1.5654	0.27490000000000014	1.8213	3.3867	2.0962	231.0	54.0	1.8594959644210178	0.00266
1.7627000000000002	0.21050000000000013	1.8857	3.6484	2.0962	204.0	33.0	1.9347722331229784	0.00334
1.4960999999999998	0.08099999999999996	2.0234	3.5195	2.1044	174.0	12.0	1.7393990313333991	0.00361
2.1211	0.33699999999999997	1.8242	3.9453	2.1612	252.0	51.0	2.1627562767240436	0.003313333333333333
2.7676000000000003	0.4062999999999999	2.084	4.8516	2.4903	420.0	96.0	2.3280230326295586	0.0018700000000000001
1.6288999999999998	-0.4274	2.6719	4.3008	2.2445	120.0	-9.0	1.6096410793817133	0.004235
1.8046999999999997	0.20750000000000002	1.7598	3.5645	1.9673	195.0	27.0	2.02551426298443	0.003946666666666667
1.7812999999999999	0.3224999999999998	1.7656	3.5469	2.0881	288.0	84.0	2.0088921613049386	0.002
1.7627000000000002	0.1299999999999999	1.9541	3.7168	2.0841	174.0	18.0	1.9020520955938796	0.0038583333333333334
1.8241999999999998	0.07289999999999974	1.9512	3.7754	2.0241	267.0	12.0	1.9349118491184911	0.0028366666666666666
1.6805999999999999	0.17900000000000005	1.5811	3.2617	1.7601	174.0	27.0	2.0629308709126555	0.004078333333333333
1.5986999999999998	0.21519999999999984	1.4951	3.0938	1.7103	195.0	36.0	2.0692930238780014	0.0036950000000000004
2.0545999999999998	0.4374	1.5938	3.6484	2.0312	246.0	72.0	2.289120341322625	0.0034050000000000005
1.4971	0.026700000000000168	1.8857	3.3828	1.9124	174.0	3.0	1.7939226812324336	0.0038199999999999996
1.7051	0.3398000000000001	1.6914	3.3965	2.0312	216.0	51.0	2.008099798983091	0.0035033333333333336
1.8897000000000002	0.2270000000000001	1.8896	3.7793	2.1166	279.0	39.0	2.0000529212531752	0.0028816666666666665
1.7733999999999999	0.1302000000000001	1.8848	3.6582	2.015	189.0	21.0	1.9408955857385397	0.00337
1.3994000000000002	0.11270000000000002	1.9033	3.3027	2.016	162.0	15.0	1.7352493038406978	0.0036266666666666665
2.2744	0.8286	1.6455	3.9199	2.4741	315.0	147.0	2.38219386204801	0.0027500000000000003
1.3857	-0.010000000000000009	1.96	3.3457	1.95	126.0	-0.0	1.7069897959183673	0.004404999999999999
1.8291000000000002	0.14600000000000013	1.9502	3.7793	2.0962	246.0	24.0	1.9379038047379757	0.0030700000000000002
1.4872999999999998	0.05909999999999993	1.96	3.4473	2.0191	204.0	9.0	1.7588265306122448	0.003075
1.8241999999999998	0.2753000000000001	1.7559	3.5801	2.0312	246.0	54.0	2.038897431516601	0.0026750000000000003
1.5635	0.2099000000000002	1.8213	3.3848	2.0312	174.0	30.0	1.8584527535277	0.003691666666666667
1.9248000000000003	0.5308000000000002	1.5654	3.4902	2.0962	204.0	72.0	2.2295898811805293	0.004033333333333333
1.4960999999999998	0.08240000000000003	1.7559	3.252	1.8383	204.0	12.0	1.8520416880232358	0.0034050000000000005
3.3945	0.3326999999999998	1.6914	5.0859	2.0241	477.0	81.0	3.0069173465768	0.002186666666666667
1.4961000000000002	-0.8110000000000002	2.7305	4.2266	1.9195	99.0	-102.0	1.5479216260758104	0.004121666666666667
1.1797	-0.6174000000000002	2.2109	3.3906	1.5935	84.0	-60.0	1.5335836084852321	0.005225
1.9432999999999998	0.33000000000000007	1.7012	3.6445	2.0312	162.0	36.0	2.1423113096637665	0.0049433333333333326
2.0899	0.39780000000000015	1.8203	3.9102	2.2181	246.0	63.0	2.14810745481514	0.0031599999999999996
1.9013000000000002	0.1261000000000001	1.6299	3.5312	1.756	237.0	21.0	2.1665132830234985	0.003563333333333333
1.9491999999999998	0.18789999999999996	1.7012	3.6504	1.8891	237.0	39.0	2.145779449800141	0.0027366666666666668
1.4619000000000002	-0.29169999999999985	1.9502	3.4121	1.6585	99.0	6.0	1.749615424059071	0.006291666666666667
2.3662	0.46209999999999996	1.626	3.9922	2.0881	351.0	99.0	2.455227552275523	0.0025433333333333336
1.8955000000000002	0.2008000000000001	1.5654	3.4609	1.7662	204.0	27.0	2.2108726204165072	0.004235
1.7509000000000001	-0.014899999999999913	1.71	3.4609	1.6951	189.0	-21.0	2.023918128654971	0.0044933333333333336
2.0156	0.014499999999999957	1.7598	3.7754	1.7743	189.0	3.0	2.1453574269803384	0.004438333333333333
1.541	0.15379999999999994	2.0156	3.5566	2.1694	168.0	21.0	1.7645366144076204	0.0035666666666666668
1.9765	0.2602	1.8848	3.8613	2.145	204.0	33.0	2.048652376910017	0.0038850000000000004
2.9921999999999995	0.44369999999999976	2.1055	5.0977	2.5492	315.0	66.0	2.421135122298741	0.002945
1.4453	-0.48270000000000035	2.8633	4.3086	2.3806	162.0	-39.0	1.5047672266266197	0.0028399999999999996
1.7519999999999998	0.3224	1.9668	3.7188	2.2892	168.0	39.0	1.8907870652837093	0.003751666666666666
1.8848000000000003	0.2812000000000001	2.1543	4.0391	2.4355	168.0	30.0	1.8749013600705566	0.004141666666666667
1.3653	0.023499999999999854	2.2109	3.5762	2.2344	147.0	3.0	1.6175313220860283	0.0036283333333333332
2.0908	0.5329000000000002	1.8213	3.9121	2.3542	246.0	84.0	2.147971229341679	0.00309
2.0225	0.19899999999999984	1.9541	3.9766	2.1531	279.0	36.0	2.0350033263394915	0.0026466666666666665
2.2871	0.0798000000000001	2.1465	4.4336	2.2263	216.0	9.0	2.065501979967389	0.0035283333333333334
1.0781	0.0	1.7012	2.7793	1.7012	147.0	0.0	1.6337291323771455	0.00375
1.9648999999999999	0.38359999999999994	1.2617	3.2266	1.6453	300.0	90.0	2.5573432670206864	0.0029233333333333333
1.8974	0.19320000000000004	1.5811	3.4785	1.7743	189.0	27.0	2.200050597685156	0.004345
1.6192	0.3173999999999999	1.6367	3.2559	1.9541	189.0	48.0	1.9893077534062442	0.0037533333333333338
1.8310000000000002	0.1301000000000001	1.7549	3.5859	1.885	279.0	24.0	2.0433642942617816	0.0028666666666666662
1.7832000000000001	0.3880000000000001	1.8301	3.6133	2.2181	195.0	66.0	1.9743729850827825	0.0029666666666666665
2.1172000000000004	0.4576999999999998	1.6914	3.8086	2.1491	231.0	66.0	2.2517441172992787	0.00362
1.4316999999999998	0.029199999999999893	2.0234	3.4551	2.0526	183.0	3.0	1.707571414450924	0.0031883333333333334
1.9218	0.4745999999999999	1.7598	3.6816	2.2344	189.0	63.0	2.092055915444937	0.003748333333333333
2.1259999999999994	0.5024999999999997	1.9248	4.0508	2.4273	195.0	60.0	2.10453034081463	0.00378
1.8516	0.3546	2.2109	4.0625	2.5655	189.0	42.0	1.8374869962458726	0.00346
1.831	0.21230000000000016	1.626	3.457	1.8383	279.0	42.0	2.126076260762608	0.0029933333333333335
1.3027000000000002	0.06509999999999994	1.7559	3.0586	1.821	174.0	12.0	1.7418987413861837	0.003091666666666667
1.9541	0.20420000000000016	1.626	3.5801	1.8302	210.0	30.0	2.2017835178351786	0.0039050000000000005
1.9726	0.2631999999999999	1.7559	3.7285	2.0191	216.0	39.0	2.1234124950168005	0.003691666666666667
1.6943000000000001	0.1339999999999999	1.9541	3.6484	2.0881	210.0	24.0	1.8670487692543882	0.002908333333333333
1.4385	0.1299999999999999	1.9541	3.3926	2.0841	147.0	18.0	1.7361445166572846	0.0038399999999999997
1.4746000000000001	0.00039999999999995595	2.041	3.5156	2.0414	126.0	0.0	1.7224889759921609	0.004386666666666666
1.6543	0.07089999999999996	1.6953	3.3496	1.7662	189.0	12.0	1.9758154898837965	0.003826666666666666
1.8095999999999999	0.11159999999999992	1.8486	3.6582	1.9602	216.0	18.0	1.9789029535864977	0.0030533333333333337
1.6622	0.08539999999999992	2.0312	3.6934	2.1166	189.0	12.0	1.818333989759748	0.0032983333333333332
1.6845999999999999	0.058599999999999985	1.8955	3.5801	1.9541	183.0	9.0	1.888736481139541	0.0035033333333333336
1.6455	0.009500000000000064	1.8389	3.4844	1.8484	195.0	0.0	1.8948284300396976	0.003561666666666667
1.0205	-0.1814	1.8389	2.8594	1.6575	126.0	-30.0	1.554951329599217	0.004293333333333334
1.751	0.060900000000000176	1.9541	3.7051	2.015	153.0	6.0	1.8960646845094928	0.004268333333333333
1.8896000000000002	0.5230999999999999	1.626	3.5156	2.1491	237.0	90.0	2.162115621156212	0.0031466666666666665
1.6319000000000001	0.26349999999999985	1.8896	3.5215	2.1531	189.0	39.0	1.8636219305673158	0.00326
1.5760999999999998	0.15650000000000008	1.7559	3.332	1.9124	174.0	21.0	1.8976023691554187	0.003841666666666667
1.4355000000000002	-0.4697	2.0957	3.5312	1.626	162.0	-63.0	1.6849739943694233	0.003315
1.4385	0.026700000000000168	1.8857	3.3242	1.9124	204.0	6.0	1.7628466882324865	0.0031233333333333334
1.7461000000000002	0.23399999999999999	2.041	3.7871	2.275	153.0	27.0	1.8555120039196473	0.004066666666666666
2.3964999999999996	0.4422999999999999	1.9668	4.3633	2.4091	216.0	54.0	2.218476713443156	0.0037233333333333333
1.6855999999999995	0.0009999999999998899	2.4121	4.0977	2.4131	153.0	0.0	1.6988101654160273	0.003423333333333334
1.6953	0.12150000000000016	2.2754	3.9707	2.3969	168.0	15.0	1.74505581436231	0.003685
1.9658	0.5151000000000001	1.6299	3.5957	2.145	210.0	72.0	2.206086262960918	0.003848333333333333
2.2305	0.25849999999999973	1.7656	3.9961	2.0241	225.0	39.0	2.2633099229723608	0.0035433333333333337
1.4258000000000002	-0.25739999999999985	2.0195	3.4453	1.7621	120.0	-30.0	1.706016340678386	0.004646666666666666
1.3916	0.044300000000000006	1.6904	3.082	1.7347	153.0	6.0	1.823237103644108	0.004221666666666667
2.2735000000000003	0.41290000000000004	1.4355	3.709	1.8484	300.0	84.0	2.583768721699756	0.002975
2.2851	0.36549999999999994	1.4961	3.7812	1.8616	231.0	60.0	2.5273711650290758	0.0036866666666666667
1.5752	-0.0947	1.9502	3.5254	1.8555	120.0	15.0	1.8077120295354323	0.0047666666666666664
1.998	0.4846999999999999	1.7598	3.7578	2.2445	195.0	66.0	2.1353562904875556	0.003703333333333333
1.4960999999999998	-0.6188	2.2793	3.7754	1.6605	120.0	-81.0	1.6563857324617206	0.004313333333333333
1.709	0.09019999999999984	1.9512	3.6602	2.0414	168.0	12.0	1.8758712587125872	0.0038933333333333337
3.0058	0.718	1.7012	4.707	2.4192	330.0	129.0	2.7668704443921937	0.0027566666666666664
1.3125	-0.45520000000000005	1.9512	3.2637	1.496	99.0	-60.0	1.6726629766297663	0.00542
2.5351999999999997	0.06489999999999996	1.8242	4.3594	1.8891	330.0	12.0	2.3897598947483827	0.00271
1.3047	-0.5853999999999999	2.2754	3.5801	1.69	126.0	-102.0	1.5733936890217104	0.003601666666666666
2.2803	0.0132000000000001	1.9541	4.2344	1.9673	300.0	3.0	2.166931068010849	0.0027600000000000003
1.6387	-0.2671999999999999	2.2832	3.9219	2.016	168.0	-39.0	1.7177207428170989	0.0031533333333333335
1.7129000000000003	-0.2939999999999998	2.0195	3.7324	1.7255	120.0	-36.0	1.8481802426343157	0.005223333333333333
1.6299000000000001	0.08390000000000009	1.6904	3.3203	1.7743	189.0	12.0	1.9642096545196404	0.0037733333333333334
1.501	0.20890000000000009	1.5654	3.0664	1.7743	141.0	27.0	1.9588603551807844	0.004764999999999999
1.7891000000000001	0.36949999999999994	1.3652	3.1543	1.7347	216.0	60.0	2.310503955464401	0.004085
1.624	0.1731999999999998	1.5615	3.1855	1.7347	225.0	30.0	2.0400256163944923	0.0034
2.0898000000000003	0.5267000000000002	1.6914	3.7812	2.2181	258.0	93.0	2.235544519333097	0.0029483333333333336
1.5596	0.06780000000000008	1.8213	3.3809	1.8891	153.0	9.0	1.8563114259045737	0.004088333333333334
2.4092	0.5834999999999999	1.5615	3.9707	2.145	315.0	123.0	2.54287544028178	0.00261
2.2598000000000003	0.4323999999999999	1.7207	3.9805	2.1531	246.0	63.0	2.3133027256349163	0.0034783333333333337
1.8242	0.20750000000000002	1.7598	3.584	1.9673	168.0	24.0	2.0365950676213207	0.004406666666666667
1.9872999999999998	0.5181	1.96	3.9473	2.4781	189.0	66.0	2.0139285714285715	0.003633333333333333
1.6328	0.14080000000000004	2.1484	3.7812	2.2892	189.0	21.0	1.7600074474027183	0.0030483333333333335
1.7088999999999999	0.33219999999999983	1.7559	3.4648	2.0881	174.0	42.0	1.9732330998348424	0.004028333333333333
1.8125	0.07899999999999996	1.6953	3.5078	1.7743	195.0	12.0	2.069132306966319	0.0035216666666666664
1.2147999999999999	-0.10640000000000005	1.7344	2.9492	1.628	153.0	-12.0	1.7004151291512914	0.004051666666666667
1.8944999999999999	0.35139999999999993	1.625	3.5195	1.9764	183.0	45.0	2.1658461538461538	0.004236666666666666
2.25	0.5040000000000002	1.7852	4.0352	2.2892	252.0	75.0	2.2603629845395474	0.003266666666666667
1.2618	-0.052200000000000024	2.1484	3.4102	2.0962	174.0	9.0	1.5873207968720908	0.00282
1.8241999999999998	0.3990999999999998	1.625	3.4492	2.0241	231.0	69.0	2.122584615384615	0.0031799999999999997
2.0254	0.34909999999999997	1.8203	3.8457	2.1694	225.0	48.0	2.11267373509861	0.0035533333333333337
1.3788999999999998	-0.054400000000000004	1.9668	3.3457	1.9124	162.0	9.0	1.7010880618263167	0.003778333333333333
1.6621	0.2388999999999999	1.7852	3.4473	2.0241	147.0	30.0	1.9310441407125252	0.004366666666666667
2.6826000000000003	0.5230999999999999	1.626	4.3086	2.1491	372.0	111.0	2.649815498154982	0.002511666666666667
2.2910000000000004	0.06479999999999997	1.9512	4.2422	2.016	225.0	9.0	2.1741492414924153	0.0033916666666666665
1.9688000000000003	-0.48429999999999995	2.3398	4.3086	1.8555	162.0	-33.0	1.8414394392683138	0.0035733333333333333
1.0508000000000002	-0.4202999999999999	2.2129	3.2637	1.7926	78.0	-42.0	1.4748520041574407	0.005615
1.6805999999999999	0.18019999999999992	1.8389	3.5195	2.0191	216.0	30.0	1.913915928000435	0.0031349999999999998
1.627	0.07909999999999995	1.8242	3.4512	1.9033	183.0	12.0	1.8918978182216861	0.00383
1.8963999999999999	0.2753000000000001	1.7559	3.6523	2.0312	195.0	39.0	2.080015946238396	0.0037316666666666666
1.7988	0.07289999999999974	1.9512	3.75	2.0241	162.0	9.0	1.9218942189421895	0.004485
1.9756000000000002	0.13449999999999984	1.8896	3.8652	2.0241	147.0	15.0	2.0455122777307366	0.005001666666666666
1.9511999999999998	0.26659999999999995	1.6367	3.5879	1.9033	189.0	36.0	2.1921549459277814	0.00417
2.0781	0.395	1.7012	3.7793	2.0962	279.0	63.0	2.2215494944744885	0.003268333333333333
2.1094	0.4140999999999999	1.8203	3.9297	2.2344	252.0	72.0	2.15881997472944	0.002895
1.3066999999999998	-0.1946000000000001	2.0156	3.3223	1.821	120.0	-12.0	1.648293312165112	0.0038383333333333334
1.8984	0.34030000000000005	1.7559	3.6543	2.0962	174.0	42.0	2.081154963266701	0.004125
1.8506	0.4052000000000002	1.626	3.4766	2.0312	195.0	57.0	2.1381303813038133	0.003953333333333333
1.5312999999999999	0.05360000000000009	1.7207	3.252	1.7743	183.0	9.0	1.889928517463823	0.0036249999999999998
2.3037	0.4702000000000002	1.626	3.9297	2.0962	288.0	84.0	2.416789667896679	0.003061666666666667
2.3613000000000004	0.00039999999999995595	2.041	4.4023	2.0414	174.0	0.0	2.1569328760411564	0.004536666666666666
1.8838	0.26359999999999983	1.5615	3.4453	1.8251	204.0	39.0	2.2064040986231186	0.0038733333333333332
1.7022	0.26980000000000004	1.6904	3.3926	1.9602	231.0	45.0	2.006980596308566	0.003216666666666667
1.8564000000000003	0.27490000000000014	1.8213	3.6777	2.0962	237.0	45.0	2.019271948608137	0.0031000000000000003
1.542	0.11270000000000002	1.9033	3.4453	2.016	147.0	15.0	1.8101718068617665	0.0040216666666666664
1.9864	0.25960000000000005	1.4355	3.4219	1.6951	279.0	54.0	2.3837687216997563	0.0030283333333333334
2.4609999999999994	0.3234999999999999	1.6367	4.0977	1.9602	351.0	66.0	2.5036353638418767	0.0027349999999999996
1.5684	-0.09400000000000008	2.0156	3.584	1.9216	147.0	-39.0	1.7781305814645763	0.0038616666666666665
2.2217000000000002	0.4618000000000002	1.8213	4.043	2.2831	258.0	75.0	2.2198429693076376	0.003065
2.0938	0.21879999999999988	2.0156	4.1094	2.2344	225.0	30.0	2.0387973804326256	0.0032983333333333332
1.4492000000000003	0.13600000000000012	2.2832	3.7324	2.4192	153.0	15.0	1.6347231955150667	0.0035383333333333334
1.8085999999999998	0.5032000000000001	1.9668	3.7754	2.47	168.0	60.0	1.9195647752694731	0.00383
1.5782000000000003	0.14170000000000016	2.0195	3.5977	2.1612	168.0	18.0	1.7814805644961627	0.0036483333333333337
1.9667999999999999	0.29279999999999995	1.7598	3.7266	2.0526	174.0	33.0	2.1176270030685305	0.004561666666666666
2.1601999999999997	0.34519999999999995	1.8242	3.9844	2.1694	195.0	42.0	2.1841903300076746	0.004111666666666666
1.7010999999999998	0.19819999999999993	1.7559	3.457	1.9541	168.0	24.0	1.9687909334244547	0.004363333333333333
1.4999999999999998	0.13369999999999993	1.6914	3.1914	1.8251	141.0	15.0	1.886839304717985	0.004651666666666667
1.5801	0.27590000000000003	1.6914	3.2715	1.9673	162.0	33.0	1.9341965235899254	0.004613333333333333
2.1904	0.3740999999999999	1.71	3.9004	2.0841	231.0	57.0	2.28093567251462	0.0035383333333333334
2.0888	0.2692000000000001	1.626	3.7148	1.8952	258.0	48.0	2.2846248462484624	0.0032283333333333335
1.6249999999999998	0.03410000000000002	1.6914	3.3164	1.7255	162.0	6.0	1.9607425801111504	0.004098333333333333
1.4336000000000002	0.09549999999999992	1.625	3.0586	1.7205	162.0	12.0	1.8822153846153848	0.0042833333333333334
1.7022	0.12970000000000015	1.5654	3.2676	1.6951	189.0	21.0	2.0873898045228056	0.003928333333333333
1.7598	0.1935	1.6367	3.3965	1.8302	168.0	24.0	2.075212317468076	0.0044083333333333335
2.3457	0.4433	1.6367	3.9824	2.08	252.0	72.0	2.4331887334270177	0.0033383333333333338
1.8769999999999998	0.2513000000000001	1.9668	3.8438	2.2181	153.0	27.0	1.9543420785031522	0.004313333333333333
1.5156000000000003	-0.012299999999999978	1.5449	3.0605	1.5326	126.0	-3.0	1.9810343711567093	0.005205
3.4882999999999997	0.3771	1.4531	4.9414	1.8302	603.0	144.0	3.4005918381391504	0.0015949999999999998
1.2187000000000001	-0.5942999999999998	2.3848	3.6035	1.7905	132.0	-36.0	1.5110281784636028	0.0032149999999999995
1.6425	0.19819999999999993	1.7559	3.3984	1.9541	168.0	27.0	1.9354177344951307	0.003925
1.7675999999999998	0.2783	1.625	3.3926	1.9033	183.0	36.0	2.087753846153846	0.004318333333333333
2.2149	0.39749999999999996	2.0156	4.2305	2.4131	231.0	51.0	2.0988787457828932	0.00344
1.5547	0.08639999999999981	2.2109	3.7656	2.2973	126.0	9.0	1.703197792754082	0.003961666666666667
2.1064000000000003	0.20279999999999987	1.8213	3.9277	2.0241	225.0	27.0	2.1565365398341845	0.003786666666666667
1.8007999999999997	0.14500000000000002	1.9512	3.752	2.0962	204.0	21.0	1.9229192291922919	0.003596666666666667
1.7489999999999999	0.2024999999999999	1.8389	3.5879	2.0414	195.0	30.0	1.9511120778726412	0.0035299999999999997
1.7557999999999998	0.008999999999999897	1.9512	3.707	1.9602	162.0	0.0	1.8998564985649855	0.0040950000000000005
1.7647	0.33240000000000025	1.8857	3.6504	2.2181	189.0	42.0	1.9358328472185395	0.0038133333333333335
1.5644999999999998	0.13070000000000004	1.8203	3.3848	1.951	195.0	21.0	1.85947371312421	0.003433333333333333
1.9853000000000003	0.33319999999999994	1.7549	3.7402	2.0881	231.0	48.0	2.131289532167075	0.0036033333333333334
1.7608000000000001	0.13980000000000015	1.6904	3.4512	1.8302	246.0	27.0	2.041646947468055	0.0031000000000000003
1.6943000000000001	0.13890000000000002	1.8213	3.5156	1.9602	189.0	21.0	1.930269587657168	0.00369
2.0889	0.4679000000000002	1.8213	3.9102	2.2892	237.0	72.0	2.146928018448361	0.0032
1.2597999999999998	-0.09709999999999996	2.0156	3.2754	1.9185	105.0	-6.0	1.6250248065092279	0.0044933333333333336
1.8203999999999998	0.3346	1.4316	3.252	1.7662	195.0	54.0	2.2715842414082146	0.00397
1.8252000000000002	0.5352000000000001	1.626	3.4512	2.1612	246.0	90.0	2.122509225092251	0.0031283333333333332
1.7598	0.49249999999999994	1.4961	3.2559	1.9886	279.0	102.0	2.1762582715059153	0.0027500000000000003
1.9541000000000002	0.5231999999999999	1.6299	3.584	2.1531	231.0	87.0	2.198907908460642	0.003161666666666667
2.8339999999999996	0.4014	1.7598	4.5938	2.1612	342.0	81.0	2.6104102738947605	0.0025766666666666663
1.3867000000000003	-0.46319999999999983	2.3848	3.7715	1.9216	99.0	-39.0	1.5814743374706477	0.004595
1.7666	-0.00029999999999996696	1.8213	3.5879	1.821	132.0	-6.0	1.9699665074397408	0.004993333333333333
1.6904999999999997	0.09599999999999986	1.5615	3.252	1.6575	279.0	21.0	2.082612872238232	0.0029916666666666663
1.9022999999999999	0.1368999999999998	1.9512	3.8535	2.0881	225.0	21.0	1.9749384993849937	0.003291666666666667
2.2265999999999995	0.13819999999999988	2.0312	4.2578	2.1694	225.0	18.0	2.096199291059472	0.003385
1.4628999999999999	-0.4958	2.1543	3.6172	1.6585	132.0	-78.0	1.679060483683795	0.004036666666666667
2.1025	0.25	1.96	4.0625	2.21	195.0	30.0	2.072704081632653	0.00394
1.6963	0.3408000000000002	1.6904	3.3867	2.0312	174.0	48.0	2.003490298154283	0.003933333333333333
1.4960999999999998	0.1531	1.6953	3.1914	1.8484	225.0	24.0	1.882498672801274	0.0033966666666666663
2.0712	0.6522999999999999	1.71	3.7812	2.3623	252.0	102.0	2.2112280701754385	0.003193333333333333
1.8223	0.2598999999999998	1.8242	3.6465	2.0841	252.0	45.0	1.998958447538647	0.0029716666666666663
1.6367	0.006000000000000005	1.8242	3.4609	1.8302	189.0	0.0	1.897215217629646	0.003848333333333333
1.8252000000000002	0.2099000000000002	1.8213	3.6465	2.0312	204.0	30.0	2.0021413276231264	0.003606666666666667
1.3389000000000002	0.06840000000000002	1.8857	3.2246	1.9541	132.0	9.0	1.7100281062735325	0.004298333333333334
2.1367	0.6019999999999999	1.6953	3.832	2.2973	195.0	75.0	2.2603668967144457	0.0041066666666666665
1.4354999999999998	0.07289999999999974	1.9512	3.3867	2.0241	162.0	9.0	1.73570110701107	0.0036716666666666664
1.8262	0.20799999999999996	1.6953	3.5215	1.9033	189.0	27.0	2.077213472541733	0.004243333333333333
1.8681999999999999	0.22009999999999996	1.8213	3.6895	2.0414	195.0	30.0	2.0257508373140065	0.0036716666666666664
1.6757000000000004	0.2243000000000004	2.002	3.6777	2.2263	189.0	30.0	1.8370129870129872	0.0033733333333333337
1.8779000000000001	0.2457999999999998	1.9033	3.7812	2.1491	246.0	42.0	1.9866547575264015	0.0029133333333333337
1.8300999999999998	0.39549999999999996	1.5078	3.3379	1.9033	246.0	72.0	2.213755139938984	0.003218333333333333
1.8223	0.2849999999999999	1.6914	3.5137	1.9764	189.0	39.0	2.077391509991723	0.004016666666666667
1.8203	-0.06659999999999977	2.0176	3.8379	1.951	237.0	9.0	1.9022105471847741	0.003105
1.6973000000000003	0.007100000000000328	2.207	3.9043	2.2141	237.0	0.0	1.7690530131400093	0.0029516666666666667
1.5762	0.0867	2.0664	3.6426	2.1531	210.0	12.0	1.7627758420441348	0.003218333333333333
2.1269	0.3319000000000001	1.9512	4.0781	2.2831	183.0	39.0	2.090047150471505	0.004135
1.876	0.2835000000000001	1.501	3.377	1.7845	237.0	51.0	2.2498334443704198	0.00346
1.5205000000000002	-0.05729999999999991	1.6904	3.2109	1.6331	120.0	-12.0	1.8994912446758165	0.005423333333333334
1.9776000000000002	0.07990000000000008	1.5654	3.543	1.6453	189.0	12.0	2.2633192794174017	0.004521666666666666
1.6494	-0.00029999999999996696	1.8213	3.4707	1.821	153.0	-3.0	1.9056168670729698	0.00396
2.0976999999999997	0.1521999999999999	1.8242	3.9219	1.9764	225.0	21.0	2.149928735884223	0.0036416666666666667
1.8183999999999998	0.32889999999999975	1.8242	3.6426	2.1531	204.0	48.0	1.9968205240653436	0.003505
1.6366999999999998	0.20189999999999975	1.9512	3.5879	2.1531	153.0	24.0	1.8388171381713816	0.00416
1.8428	0.5329000000000002	1.8213	3.6641	2.3542	216.0	75.0	2.01180475484544	0.0034100000000000003
2.0604999999999998	0.07309999999999994	1.7012	3.7617	1.7743	267.0	15.0	2.211203856101575	0.0028350000000000003
1.0985999999999998	-0.15810000000000013	1.9131	3.0117	1.755	120.0	-12.0	1.5742512153050023	0.0043033333333333335
1.6690000000000003	0.14160000000000017	1.8896	3.5586	2.0312	153.0	18.0	1.883255715495343	0.004261666666666666
1.3730999999999998	-0.06410000000000005	1.8242	3.1973	1.7601	147.0	-9.0	1.7527135182545772	0.004278333333333334
2.0234	0.44789999999999974	1.7012	3.7246	2.1491	189.0	57.0	2.189395720667764	0.004206666666666667
1.8056999999999999	0.38680000000000003	1.7744	3.5801	2.1612	225.0	57.0	2.0176397655545535	0.003416666666666667
1.5019999999999998	0.13379999999999992	1.8203	3.3223	1.9541	183.0	21.0	1.8251387133988901	0.003533333333333333
1.7149	0.4497	1.6953	3.4102	2.145	183.0	63.0	2.011561375567746	0.0037983333333333332
1.7139000000000002	0.26980000000000004	1.6904	3.4043	1.9602	153.0	33.0	2.013902035021297	0.00455
1.8271	-0.03639999999999999	1.6299	3.457	1.5935	162.0	-12.0	2.1209890177311492	0.004388333333333333
1.6992	0.20379999999999998	1.6914	3.3906	1.8952	195.0	30.0	2.0046115643845335	0.0038283333333333333
2.0391	0.45379999999999976	1.6953	3.7344	2.1491	210.0	69.0	2.202795965315873	0.0034883333333333337
1.1825999999999999	-0.09779999999999989	1.8213	3.0039	1.7235	105.0	-6.0	1.6493164223356942	0.005193333333333333
1.4619	-0.12489999999999979	1.626	3.0879	1.5011	147.0	-15.0	1.8990774907749077	0.004713333333333333
1.7608	0.1308999999999998	1.4951	3.2559	1.626	189.0	21.0	2.1777138652932915	0.0041266666666666665
1.8379	0.06899999999999995	1.4961	3.334	1.5651	168.0	9.0	2.2284606643940914	0.004541666666666667
1.3711	0.1492	1.4961	2.8672	1.6453	126.0	18.0	1.916449435198182	0.005298333333333334
1.8944999999999999	0.47340000000000004	1.1719	3.0664	1.6453	183.0	66.0	2.616605512415735	0.005096666666666667
1.5068	0.15460000000000007	1.6299	3.1367	1.7845	189.0	24.0	1.9244738941039328	0.0035716666666666666
1.8945	0.46909999999999985	1.5723	3.4668	2.0414	252.0	87.0	2.2049227246708645	0.0029783333333333333
1.4569999999999999	0.06919999999999993	1.7559	3.2129	1.8251	153.0	9.0	1.8297739051198814	0.004143333333333333
2.0527	0.34609999999999985	1.6953	3.748	2.0414	168.0	39.0	2.2108181442812485	0.004763333333333333
1.7245999999999997	0.2932999999999999	1.4668	3.1914	1.7601	189.0	42.0	2.175756749386419	0.004215
1.8417999999999999	0.4051	1.5449	3.3867	1.95	237.0	66.0	2.192180723671435	0.00347
1.7666	0.35040000000000004	1.626	3.3926	1.9764	252.0	69.0	2.086469864698647	0.0028899999999999998
2.1151999999999997	0.4437	1.5723	3.6875	2.016	168.0	57.0	2.3452903389938307	0.004404999999999999
1.54	0.00029999999999996696	1.71	3.25	1.7103	132.0	0.0	1.9005847953216375	0.004795000000000001
1.6621000000000001	0.12939999999999996	2.0156	3.6777	2.145	162.0	15.0	1.8246179797578885	0.0038083333333333333
1.4483	0.06040000000000001	1.8896	3.3379	1.95	126.0	6.0	1.7664585097375105	0.004488333333333333
1.4404	0.3237000000000001	1.8213	3.2617	2.145	168.0	42.0	1.7908636688079942	0.003933333333333333
2.5351999999999997	0.7084999999999999	1.7656	4.3008	2.4741	288.0	108.0	2.435885817852288	0.0031166666666666665
1.5176000000000003	-0.15879999999999983	2.2754	3.793	2.1166	120.0	-6.0	1.6669596554451966	0.004013333333333333
1.9111000000000002	0.0132000000000001	1.9541	3.8652	1.9673	174.0	3.0	1.9779949849035363	0.0038433333333333327
1.3066	-0.4865999999999999	2.0801	3.3867	1.5935	105.0	-48.0	1.6281428777462623	0.005083333333333334
2.7207000000000003	0.31320000000000014	2.041	4.7617	2.3542	351.0	60.0	2.333023027927487	0.0023916666666666665
1.626	0.26339999999999986	1.8857	3.5117	2.1491	162.0	33.0	1.8622792596913613	0.0038433333333333327
1.8221999999999998	0.20329999999999981	1.8848	3.707	2.0881	174.0	21.0	1.9667869269949065	0.004661666666666666
2.0879	0.13260000000000005	2.1465	4.2344	2.2791	153.0	12.0	1.972699743768926	0.004945
1.3867	0.2661	1.8301	3.2168	2.0962	189.0	39.0	1.7577181574777334	0.0034350000000000006
1.96	0.47009999999999996	1.7744	3.7344	2.2445	246.0	72.0	2.104598737601443	0.0032500000000000003
1.5722	0.02859999999999996	1.7559	3.3281	1.7845	174.0	3.0	1.895381285950225	0.0037733333333333334
1.7930000000000001	0.1552	1.7207	3.5137	1.8759	174.0	21.0	2.04201778346022	0.003931666666666667
2.04	0.5301	1.9541	3.9941	2.4842	237.0	78.0	2.043958855739215	0.003051666666666667
2.0215	0.19510000000000005	2.084	4.1055	2.2791	162.0	21.0	1.9700095969289828	0.004383333333333334
1.6289	0.12959999999999994	1.6914	3.3203	1.821	183.0	18.0	1.9630483623034174	0.0039050000000000005
1.6377	0.14440000000000008	1.6299	3.2676	1.7743	168.0	21.0	2.0047855696668506	0.003971666666666667
1.6875	0.07899999999999996	1.6953	3.3828	1.7743	189.0	12.0	1.9953990444169174	0.0036216666666666663
1.6348	0.20379999999999998	1.6914	3.3262	1.8952	231.0	36.0	1.9665365969019748	0.00304
1.6631000000000002	0.2642	1.7549	3.418	2.0191	315.0	78.0	1.9476893270271811	0.0018066666666666665
1.8222	0.07719999999999994	2.084	3.9062	2.1612	195.0	12.0	1.8743761996161228	0.003118333333333333
1.6181999999999999	0.15569999999999995	1.8857	3.5039	2.0414	246.0	30.0	1.858142864718672	0.0026116666666666667
1.9462000000000002	0.3881000000000001	1.96	3.9062	2.3481	231.0	60.0	1.9929591836734695	0.003011666666666667
1.9707	0.3330000000000002	2.0801	4.0508	2.4131	246.0	51.0	1.9474063746935244	0.0029316666666666666
2.3672	0.6577999999999999	1.8203	4.1875	2.4781	252.0	93.0	2.3004449815964403	0.00334
1.6680000000000001	-0.040999999999999925	2.2754	3.9434	2.2344	153.0	18.0	1.7330579238815154	0.004055
1.7383	0.30899999999999994	1.9883	3.7266	2.2973	174.0	42.0	1.874264447015038	0.0034950000000000003
1.5663999999999998	0.0004999999999999449	1.9668	3.5332	1.9673	126.0	0.0	1.7964205816554808	0.004613333333333333
1.7617	0.024699999999999944	1.7598	3.5215	1.7845	162.0	3.0	2.0010796681441074	0.004646666666666666
1.6915	0.14829999999999988	2.0312	3.7227	2.1795	231.0	24.0	1.8327589602205592	0.00281
1.6268999999999998	0.3615999999999999	1.8301	3.457	2.1917	216.0	66.0	1.8889678159663406	0.002776666666666667
3.7764000000000006	0.26790000000000025	1.9502	5.7266	2.2181	903.0	114.0	2.936416777766383	0.0011233333333333334
1.3848000000000003	-0.9453	2.7988	4.1836	1.8535	84.0	-330.0	1.4947834786337002	0.004881666666666667
1.8408000000000002	0.21230000000000016	1.626	3.4668	1.8383	174.0	27.0	2.1321033210332105	0.0043100000000000005
1.75	0.12959999999999994	1.7656	3.5156	1.8952	183.0	18.0	1.9911644766651564	0.00408
1.7596999999999998	0.20750000000000002	1.7598	3.5195	1.9673	216.0	36.0	1.9999431753608363	0.0031466666666666665
2.8906	0.006000000000000005	1.8242	4.7148	1.8302	462.0	3.0	2.584585023571977	0.0019349999999999999
1.6483999999999999	0.1977	1.6914	3.3398	1.8891	225.0	36.0	1.974577273264751	0.0031133333333333334
1.9599	0.14440000000000008	1.6299	3.5898	1.7743	252.0	24.0	2.202466408982146	0.003633333333333333
1.5155999999999998	-0.1963999999999999	1.6914	3.207	1.495	111.0	-27.0	1.896062433487052	0.005396666666666667
1.8408	0.3862000000000001	1.5811	3.4219	1.9673	189.0	51.0	2.164252735437354	0.004225
2.0233999999999996	0.4040999999999999	1.5723	3.5957	1.9764	174.0	51.0	2.2869045347579977	0.0044983333333333325
1.8183	0.514	1.8301	3.6484	2.3441	237.0	81.0	1.993552264903557	0.003091666666666667
2.0273000000000003	0.39329999999999976	1.7598	3.7871	2.1531	231.0	60.0	2.152005909762473	0.003428333333333333
1.8221999999999998	0.32930000000000015	1.8848	3.707	2.2141	252.0	63.0	1.9667869269949065	0.0025849999999999996
1.501	0.38670000000000027	1.8213	3.3223	2.208	168.0	54.0	1.824136605721188	0.0035833333333333333
2.0859	0.6665000000000001	1.4297	3.5156	2.0962	252.0	117.0	2.4589774078478004	0.00326
1.8417999999999999	0.39669999999999983	1.6914	3.5332	2.0881	204.0	57.0	2.0889204209530567	0.0036300000000000004
2.2256	0.5159	1.9033	4.1289	2.4192	204.0	60.0	2.1693374665055427	0.004076666666666667
1.3359	0.015099999999999891	2.1543	3.4902	2.1694	120.0	3.0	1.6201086199693635	0.004458333333333333
1.5292999999999999	0.3760000000000001	1.7852	3.3145	2.1612	126.0	45.0	1.856654716558369	0.00415
1.0498999999999998	-0.4585999999999999	1.8896	2.9395	1.431	84.0	-87.0	1.555620237087214	0.005635
1.7518999999999998	0.2028000000000001	1.3145	3.0664	1.5173	189.0	30.0	2.332750095093191	0.004555
2.0987	0.33509999999999995	1.4951	3.5938	1.8302	342.0	90.0	2.403718814794997	0.00224
2.1572000000000005	0.2865	1.7549	3.9121	2.0414	246.0	45.0	2.229243831557354	0.0034449999999999997
1.3769	0.016100000000000225	2.0801	3.457	2.0962	168.0	3.0	1.6619393298399117	0.003371666666666667
1.8857000000000002	0.19920000000000004	1.7549	3.6406	1.9541	231.0	30.0	2.0745341614906834	0.0035166666666666666
1.5625	0.20379999999999976	1.8203	3.3828	2.0241	267.0	45.0	1.858374993133	0.0023216666666666668
1.4961	0.34999999999999987	1.6914	3.1875	2.0414	147.0	45.0	1.8845335225257183	0.004265
1.8056999999999999	-0.01429999999999998	1.7744	3.5801	1.7601	153.0	-21.0	2.0176397655545535	0.004763333333333333
1.248	-0.07210000000000005	1.8301	3.0781	1.758	111.0	-9.0	1.6819299491831048	0.005201666666666667
2.2120000000000006	0.1984999999999999	1.8896	4.1016	2.0881	420.0	54.0	2.1706181202370876	0.0018166666666666665
1.3359999999999999	-0.2289000000000001	2.1484	3.4844	1.9195	216.0	-30.0	1.6218581269782162	0.002345
2.1377	0.11159999999999992	1.7744	3.9121	1.886	237.0	21.0	2.2047452660054105	0.003008333333333333
1.6874999999999998	0.07099999999999995	1.8242	3.5117	1.8952	162.0	9.0	1.925063041333187	0.00423
2.08	0.32519999999999993	1.8848	3.9648	2.21	195.0	42.0	2.103565365025467	0.003705
1.8436999999999997	0.2984	2.1797	4.0234	2.4781	168.0	33.0	1.8458503463779419	0.003821666666666667
2.0664000000000002	0.18500000000000005	2.2891	4.3555	2.4741	204.0	24.0	1.9027128565811893	0.0033583333333333334
1.6953	0.06879999999999997	1.8203	3.5156	1.8891	162.0	9.0	1.93133000054936	0.004433333333333333
1.8213	0.1339999999999999	1.9541	3.7754	2.0881	153.0	15.0	1.9320403254695255	0.004431666666666667
1.8358999999999999	0.33330000000000015	1.8848	3.7207	2.2181	168.0	42.0	1.9740556027164684	0.00401
1.4385	0.12590000000000012	1.9541	3.3926	2.08	111.0	12.0	1.7361445166572846	0.004803333333333333
1.9034	0.27690000000000015	1.6904	3.5938	1.9673	231.0	42.0	2.1260056791292	0.0035700000000000003
1.6845999999999999	-0.01419999999999999	1.9033	3.5879	1.8891	162.0	-6.0	1.885094309882835	0.004286666666666667
2.0147	0.009500000000000064	1.8857	3.9004	1.8952	174.0	0.0	2.0684096091637056	0.004311666666666667
1.9668	0.06899999999999995	2.0801	4.0469	2.1491	189.0	9.0	1.9455314648334217	0.0036283333333333332
1.9571000000000005	0.06960000000000033	2.1445	4.1016	2.2141	162.0	6.0	1.9126136628584756	0.00444
1.7705000000000002	0.33420000000000005	1.626	3.3965	1.9602	162.0	42.0	2.088868388683887	0.004428333333333333
1.9414	0.5098999999999998	1.8301	3.7715	2.34	204.0	66.0	2.0608163488333973	0.003691666666666667
2.4940999999999995	0.2751000000000001	1.9512	4.4453	2.2263	330.0	51.0	2.2782390323903234	0.00262
2.1455	0.3941999999999999	1.6299	3.7754	2.0241	189.0	48.0	2.3163384256702866	0.004421666666666666
2.3399	0.4586000000000001	2.0195	4.3594	2.4781	225.0	63.0	2.1586531319633573	0.003235
1.9472	0.6459999999999999	2.084	4.0312	2.73	252.0	114.0	1.9343570057581574	0.0023566666666666666
1.7441000000000002	0.3217000000000001	1.3145	3.0586	1.6362	246.0	60.0	2.3268162799543552	0.0036483333333333337
1.7793	0.26960000000000006	1.4316	3.2109	1.7012	174.0	39.0	2.242875104777871	0.00446
1.9072000000000002	0.30489999999999995	1.5811	3.4883	1.886	168.0	36.0	2.2062488141167544	0.004853333333333334
2.0254	0.5448	1.4316	3.457	1.9764	279.0	117.0	2.4147806649902206	0.00273
1.5604999999999998	0.1197999999999999	1.7012	3.2617	1.821	168.0	15.0	1.9172936750529037	0.004216666666666666
3.2606999999999995	0.39139999999999997	1.5596	4.8203	1.951	393.0	75.0	3.0907283918953574	0.002963333333333334
1.5683	0.0927	1.7598	3.3281	1.8525	162.0	12.0	1.8911808160018184	0.0038183333333333333
2.0039	0.18369999999999997	1.5723	3.5762	1.756	252.0	33.0	2.274502321439929	0.00331
1.5205	0.19610000000000016	1.7549	3.2754	1.951	279.0	54.0	1.8664311356772465	0.0020066666666666666
1.6806	0.17599999999999993	1.71	3.3906	1.886	168.0	24.0	1.9828070175438597	0.004218333333333333
1.8926	0.30899999999999994	1.9883	3.8809	2.2973	195.0	42.0	1.9518684303173566	0.0034583333333333332
1.6795999999999998	0.13709999999999978	2.1602	3.8398	2.2973	162.0	18.0	1.7775205999444494	0.0036750000000000003
2.2440999999999995	0.6488	1.9512	4.1953	2.6	267.0	114.0	2.150112751127511	0.00249
1.8633000000000002	0.06899999999999995	2.0801	3.9434	2.1491	162.0	9.0	1.895774241622999	0.0037966666666666665
1.8926000000000003	0.38850000000000007	2.1465	4.0391	2.535	183.0	45.0	1.881714418821337	0.003768333333333333
1.7334	0.1987000000000001	1.6904	3.4238	1.8891	216.0	33.0	2.025437766209181	0.0033216666666666668
2.0723000000000003	0.1907000000000001	2.2793	4.3516	2.47	168.0	21.0	1.9091826437941475	0.003685
1.5254000000000003	-0.03100000000000014	2.7793	4.3047	2.7483	267.0	72.0	1.5488432339078186	0.0015566666666666667
1.9433999999999996	-0.30740000000000034	2.4199	4.3633	2.1125	372.0	3.0	1.803091036819703	0.0011166666666666666
0.7832000000000003	0.03750000000000009	2.5645	3.3477	2.602	162.0	9.0	1.305400662897251	0.001745
1.8086	0.1935	1.6367	3.4453	1.8302	216.0	33.0	2.1050284108266633	0.00344
2.3427999999999995	0.3981999999999999	1.7549	4.0977	2.1531	273.0	69.0	2.3350048435808306	0.002975
1.2461000000000002	-0.3890999999999998	2.0801	3.3262	1.691	99.0	-51.0	1.599057737608769	0.0052383333333333336
1.8662	0.22009999999999996	1.8213	3.6875	2.0414	231.0	36.0	2.024652720584198	0.0032083333333333334
2.3642000000000003	0.3711	1.8389	4.2031	2.21	372.0	93.0	2.2856599053782154	0.001956666666666667
1.2539000000000002	-0.32719999999999994	2.1797	3.4336	1.8525	153.0	-12.0	1.575262650823508	0.0033383333333333338
2.0039	0.4589000000000001	1.5723	3.5762	2.0312	174.0	57.0	2.274502321439929	0.004386666666666666
1.4756000000000002	-0.16710000000000003	1.8896	3.3652	1.7225	141.0	-33.0	1.780906011854361	0.004365
1.6327999999999998	0.12619999999999987	1.7598	3.3926	1.886	189.0	21.0	1.9278327082623024	0.0035
2.7344000000000004	0.1947000000000001	1.8203	4.5547	2.015	447.0	51.0	2.5021699719826405	0.002021666666666667
1.8300999999999998	-0.26180000000000003	2.3418	4.1719	2.08	204.0	-39.0	1.7814928687334528	0.0028383333333333338
1.8329999999999997	0.4594999999999998	1.5596	3.3926	2.0191	258.0	84.0	2.175301359322903	0.0031216666666666663
2.4883000000000006	0.9816999999999998	1.6914	4.1797	2.6731	315.0	180.0	2.4711481612865085	0.002531666666666667
1.6875000000000004	0.4085000000000001	2.3398	4.0273	2.7483	153.0	48.0	1.721215488503291	0.0034366666666666664
1.9258000000000002	0.367	2.1172	4.043	2.4842	189.0	45.0	1.9095975817116948	0.0036266666666666665
1.6845999999999999	0.2535999999999998	1.8955	3.5801	2.1491	174.0	33.0	1.888736481139541	0.0039050000000000005
1.6971999999999998	0.19520000000000004	1.8848	3.582	2.08	174.0	24.0	1.9004668930390491	0.003925
1.8378999999999999	0.20999999999999996	1.9512	3.7891	2.1612	162.0	24.0	1.9419331693316932	0.004508333333333334
2.2129000000000003	0.20189999999999975	1.9512	4.1641	2.1531	174.0	21.0	2.1341225912259123	0.004455
1.9345	0.3689	1.5811	3.5156	1.95	246.0	63.0	2.2235152741762065	0.00331
1.9950999999999999	0.07390000000000008	1.8213	3.8164	1.8952	189.0	9.0	2.095426343820348	0.00398
1.6132999999999997	0.1862999999999997	1.9668	3.5801	2.1531	132.0	21.0	1.8202664226154157	0.004488333333333333
2.0381	0.25949999999999984	1.8896	3.9277	2.1491	225.0	39.0	2.078588060965284	0.003355
1.6836000000000002	0.10400000000000009	2.041	3.7246	2.145	225.0	18.0	1.8248897599216072	0.0028333333333333335
1.7207000000000001	0.061799999999999855	1.8242	3.5449	1.886	195.0	9.0	1.9432628001315646	0.0034516666666666667
1.6465	0.06380000000000008	1.7207	3.3672	1.7845	141.0	9.0	1.9568780147614344	0.004781666666666667
1.6678999999999997	0.09719999999999995	1.5938	3.2617	1.691	147.0	12.0	2.0464926590538335	0.00487
1.9394999999999998	0.4462999999999999	1.5078	3.4473	1.9541	231.0	72.0	2.2863111818543573	0.003606666666666667
2.0233999999999996	0.38860000000000006	1.6914	3.7148	2.08	132.0	36.0	2.1962870994442474	0.0058783333333333335
2.1015	-0.8791	2.6016	4.7031	1.7225	174.0	-165.0	1.8077721402214022	0.0033183333333333333
2.1405999999999996	-0.26770000000000005	2.3477	4.4883	2.08	288.0	-33.0	1.9117860033224003	0.002146666666666667
3.5839999999999996	-0.45740000000000025	2.7324	6.3164	2.275	357.0	-39.0	2.31166739862392	0.0021716666666666664
2.4277	-0.6194	2.2129	4.6406	1.5935	189.0	-93.0	2.0970671968909578	0.0035033333333333336
1.9394999999999998	0.05689999999999973	2.0312	3.9707	2.0881	195.0	9.0	1.9548542733359588	0.0034066666666666664
1.6074000000000002	0.3330000000000002	2.0801	3.6875	2.4131	153.0	36.0	1.7727513100331715	0.004226666666666667
1.5175999999999998	-0.2833999999999999	2.2344	3.752	1.951	132.0	-18.0	1.6791979949874687	0.003871666666666667
1.7538999999999998	0.12939999999999996	2.0156	3.7695	2.145	225.0	21.0	1.8701627307005357	0.0027733333333333334
2.0371000000000006	0.5321000000000002	2.0801	4.1172	2.6122	237.0	87.0	1.9793279169270712	0.0025900000000000003
1.8515000000000001	0.2641	2.084	3.9355	2.3481	162.0	30.0	1.8884357005758157	0.0041783333333333325
1.6307999999999998	0.2528999999999999	2.1602	3.791	2.4131	141.0	27.0	1.7549300990649013	0.004136666666666667
1.6307999999999998	-0.21020000000000016	2.1602	3.791	1.95	168.0	-24.0	1.7549300990649013	0.003218333333333333
1.1875999999999998	-0.3077000000000001	2.0312	3.2188	1.7235	111.0	-24.0	1.584679007483261	0.004581666666666666
1.5098	0.25849999999999995	1.6367	3.1465	1.8952	162.0	36.0	1.92246593755728	0.004128333333333334
1.6631	0.3237000000000001	1.8213	3.4844	2.145	141.0	36.0	1.9131389666721572	0.0043683333333333334
2.2803000000000004	0.5058	1.9033	4.1836	2.4091	288.0	87.0	2.1980770241160092	0.0026683333333333333
1.8486000000000002	0.2410000000000001	1.71	3.5586	1.951	174.0	30.0	2.0810526315789475	0.0043683333333333334
1.6249999999999998	0.19489999999999985	1.8242	3.4492	2.0191	174.0	24.0	1.8908014472097356	0.004206666666666667
2.1309	0.5196999999999998	1.8203	3.9512	2.34	189.0	66.0	2.1706312146349505	0.003876666666666667
1.5820000000000003	0.09740000000000038	2.1289	3.7109	2.2263	153.0	12.0	1.7431067687538166	0.0036466666666666665
1.7588	0.28310000000000013	1.8213	3.5801	2.1044	225.0	45.0	1.965683852193488	0.0031816666666666664
2.5096999999999996	0.5243	1.8848	4.3945	2.4091	363.0	99.0	2.331547113752122	0.0024483333333333336
1.6309	-0.14460000000000006	2.2246	3.8555	2.08	174.0	-42.0	1.7331205609997302	0.003003333333333333
1.5811000000000002	0.010800000000000143	1.6904	3.2715	1.7012	126.0	0.0	1.9353407477520115	0.00536
1.7050999999999998	0.26560000000000006	1.7656	3.4707	2.0312	189.0	36.0	1.9657340280924331	0.003791666666666667
1.7744000000000002	0.5198000000000003	1.9502	3.7246	2.47	210.0	81.0	1.9098553994462109	0.0029716666666666663
2.1416	0.37060000000000004	1.7744	3.916	2.145	153.0	36.0	2.2069431920649234	0.00526
2.165	0.45310000000000006	1.96	4.125	2.4131	162.0	45.0	2.104591836734694	0.0047350000000000005
1.8075999999999999	0.054200000000000026	1.9131	3.7207	1.9673	147.0	6.0	1.9448539020438032	0.004601666666666667
2.1367	0.2869999999999999	1.7656	3.9023	2.0526	183.0	36.0	2.210183507023108	0.004123333333333334
1.8887	0.2349000000000001	1.8613	3.75	2.0962	162.0	27.0	2.014720893998818	0.004291666666666667
2.1679	0.4756	1.7344	3.9023	2.21	252.0	87.0	2.249942343173432	0.0027833333333333334
1.4071999999999998	-0.20130000000000003	1.9248	3.332	1.7235	99.0	-6.0	1.7310889443059019	0.005521666666666666
2.0332	0.3359000000000001	1.6953	3.7285	2.0312	168.0	36.0	2.1993157553235414	0.004889999999999999
2.6679	0.12400000000000011	2.2891	4.957	2.4131	393.0	30.0	2.1654798829234196	0.0017633333333333335
1.7881000000000002	0.15179999999999993	1.8896	3.6777	2.0414	189.0	21.0	1.9462849280270957	0.0039366666666666664
1.5859999999999999	0.25039999999999996	1.7656	3.3516	2.016	153.0	33.0	1.8982782057091072	0.004098333333333333
1.9463000000000001	0.08040000000000003	1.6299	3.5762	1.7103	162.0	9.0	2.1941223387937914	0.004925
1.6612000000000002	0.1984999999999999	1.8896	3.5508	2.0881	195.0	27.0	1.8791278577476715	0.00391
2.1084	0.7216	1.5615	3.6699	2.2831	183.0	93.0	2.350240153698367	0.00406
1.5811000000000002	0.13030000000000008	1.8857	3.4668	2.016	162.0	15.0	1.8384684732460095	0.004156666666666667
2.7441000000000004	0.3880000000000001	1.8301	4.5742	2.2181	342.0	81.0	2.499426260860062	0.0023866666666666667
1.8788999999999998	0.38739999999999997	1.9668	3.8457	2.3542	195.0	51.0	1.9553081147040876	0.0034716666666666667
2.4004000000000003	0.45379999999999976	2.1543	4.5547	2.6081	300.0	84.0	2.1142366429930837	0.0023083333333333337
1.7890999999999995	-0.4196000000000002	2.4062	4.1953	1.9866	141.0	-36.0	1.7435375280525307	0.0038383333333333334
1.6776999999999997	-0.001200000000000312	2.1543	3.832	2.1531	153.0	12.0	1.7787680453047392	0.003941666666666666
1.8789000000000002	0.3286000000000002	2.0195	3.8984	2.3481	204.0	45.0	1.930378806635306	0.0033500000000000005
1.4346	0.12970000000000015	1.8213	3.2559	1.951	189.0	24.0	1.78767913029155	0.0028799999999999997
1.6347	0.2753000000000001	1.7559	3.3906	2.0312	225.0	45.0	1.930975568084743	0.00334
2.3046999999999995	0.3388	1.7656	4.0703	2.1044	258.0	54.0	2.305335296782963	0.0032500000000000003
1.7696	0.20680000000000032	2.0195	3.7891	2.2263	162.0	24.0	1.876256499133449	0.00409
2.1534000000000004	0.46240000000000014	1.8857	4.0391	2.3481	195.0	54.0	2.141963196690884	0.003974999999999999
1.9707	0.3247	2.0234	3.9941	2.3481	204.0	45.0	1.9739547296629434	0.003235
1.6826000000000003	0.25560000000000005	1.5654	3.248	1.821	231.0	48.0	2.074869043056088	0.0032149999999999995
1.8866999999999998	0.26560000000000006	1.7656	3.6523	2.0312	252.0	48.0	2.0685885817852285	0.002863333333333333
1.4385	0.13839999999999986	1.8857	3.3242	2.0241	162.0	18.0	1.7628466882324865	0.0036650000000000003
2.2852	0.19879999999999987	1.8203	4.1055	2.0191	300.0	36.0	2.2553974619568202	0.002815
1.5585999999999998	-0.2290000000000001	2.1465	3.7051	1.9175	147.0	-36.0	1.7261122757978102	0.003791666666666667
1.7246000000000001	0.06469999999999998	1.8203	3.5449	1.885	162.0	9.0	1.94742624842059	0.0041400000000000005
1.8066	0.10030000000000006	1.7207	3.5273	1.821	153.0	12.0	2.0499215435578546	0.004708333333333333
2.1533	0.4618000000000002	1.8213	3.9746	2.2831	225.0	60.0	2.182287377148191	0.0038599999999999997
1.7392	0.19230000000000014	1.8389	3.5781	2.0312	132.0	18.0	1.9457828049377346	0.005133333333333333
1.6240999999999999	0.009500000000000064	1.8857	3.5098	1.8952	147.0	0.0	1.861271676300578	0.005045000000000001
1.9843	0.13929999999999976	1.8848	3.8691	2.0241	168.0	15.0	2.052790747028862	0.004745
1.5781	-0.06350000000000011	1.9668	3.5449	1.9033	174.0	-21.0	1.8023693308928208	0.0041066666666666665
1.7636999999999998	0.2638999999999998	1.8242	3.5879	2.0881	174.0	33.0	1.966834776888499	0.004003333333333334
1.7051	0.14629999999999987	1.8301	3.5352	1.9764	168.0	18.0	1.9316977214359872	0.0043033333333333335
2.0391000000000004	0.22839999999999994	1.8242	3.8633	2.0526	195.0	27.0	2.117805065234075	0.0044
2.1563000000000003	0.18659999999999988	2.0234	4.1797	2.21	216.0	24.0	2.065681526144114	0.003691666666666667
2.2168	0.05339999999999989	2.0957	4.3125	2.1491	321.0	15.0	2.0577849883093955	0.0018333333333333333
1.626	0.2627999999999999	1.8213	3.4473	2.0841	204.0	45.0	1.8927689013342117	0.0030633333333333333
2.1465	0.2677999999999998	1.8203	3.9668	2.0881	258.0	45.0	2.1792012305663904	0.0030416666666666665
2.6035000000000004	0.26690000000000014	1.9512	4.5547	2.2181	279.0	45.0	2.334307093070931	0.002853333333333333
1.4082	-0.38770000000000016	2.3418	3.75	1.9541	141.0	-36.0	1.6013323084806559	0.00329
1.6387	0.28279999999999994	2.1445	3.7832	2.4273	210.0	48.0	1.7641408253672186	0.002606666666666667
1.5644	0.2601	1.7559	3.3203	2.016	189.0	42.0	1.890939119539837	0.003216666666666667
1.8867	0.32020000000000004	1.7598	3.6465	2.08	258.0	54.0	2.072110467098534	0.0031133333333333334
1.9511999999999998	0.4549000000000001	1.8242	3.7754	2.2791	351.0	111.0	2.069619559258853	0.002025
1.7529	0.32089999999999996	1.9541	3.707	2.275	294.0	78.0	1.8970369991300342	0.001983333333333333
1.8241999999999998	0.20189999999999975	1.9512	3.7754	2.1531	162.0	21.0	1.9349118491184911	0.004386666666666666
1.9551	0.33699999999999997	1.8242	3.7793	2.1612	204.0	45.0	2.0717574827321568	0.0036516666666666663
1.8213	0.2722000000000002	1.9541	3.7754	2.2263	183.0	33.0	1.9320403254695255	0.0037833333333333334
1.9003999999999999	0.6520999999999999	2.084	3.9844	2.7361	204.0	87.0	1.9119001919385796	0.003178333333333334
1.9902000000000002	0.5225999999999997	2.1465	4.1367	2.6691	189.0	63.0	1.9271837875611462	0.003526666666666667
1.6963	0.1947000000000001	1.5654	3.2617	1.7601	195.0	30.0	2.0836207997955793	0.0038633333333333336
1.8319999999999999	0.20009999999999994	1.625	3.457	1.8251	246.0	33.0	2.1273846153846154	0.003368333333333333
1.8202999999999998	0.1935	1.6367	3.457	1.8302	231.0	39.0	2.1121769414064886	0.0029683333333333337
1.626	0.0	1.626	3.252	1.626	183.0	0.0	2.0	0.0038516666666666664
4.501	0.3939999999999999	1.4951	5.9961	1.8891	966.0	195.0	4.010500969834793	0.0011933333333333334
1.1796999999999997	-0.2943	1.7598	2.9395	1.4655	99.0	-54.0	1.6703602682122967	0.005018333333333333
1.6591999999999998	0.19379999999999997	1.3662	3.0254	1.56	153.0	24.0	2.2144634753330403	0.0052699999999999995
1.7030999999999998	0.24770000000000003	1.5723	3.2754	1.82	168.0	33.0	2.083190230871971	0.004501666666666667
1.6670000000000003	0.3298000000000001	1.5654	3.2324	1.8952	237.0	69.0	2.0649035390315578	0.0027366666666666668
1.7138999999999998	0.47819999999999974	1.6709	3.3848	2.1491	195.0	69.0	2.0257346340295648	0.0035816666666666666
1.9004	0.4202999999999999	1.8242	3.7246	2.2445	225.0	66.0	2.041771735555312	0.0031666666666666666
1.7666000000000002	0.3390000000000002	1.9502	3.7168	2.2892	279.0	69.0	1.9058558096605478	0.0023066666666666665
1.9668	-0.32020000000000026	2.4043	4.3711	2.0841	162.0	-9.0	1.8180343551137546	0.0036533333333333335
2.0839999999999996	0.05010000000000003	2.4199	4.5039	2.47	252.0	9.0	1.8611926112649282	0.002483333333333333
1.3476000000000004	-0.5495999999999999	2.6641	4.0117	2.1145	132.0	-27.0	1.5058368679854361	0.003481666666666667
1.9414000000000002	0.13020000000000032	2.3398	4.2812	2.47	153.0	15.0	1.829729036669801	0.003995
1.8828	0.16990000000000016	1.8613	3.7441	2.0312	195.0	24.0	2.0115510664589267	0.0036300000000000004
1.5166	-0.047599999999999865	1.96	3.4766	1.9124	168.0	3.0	1.7737755102040815	0.003633333333333333
2.2001999999999997	0.45920000000000005	1.96	4.1602	2.4192	321.0	93.0	2.1225510204081632	0.0022633333333333333
2.0947	0.25870000000000015	1.8213	3.916	2.08	183.0	36.0	2.1501125569648054	0.0038133333333333335
1.5878999999999999	-0.26180000000000003	2.3418	3.9297	2.08	120.0	-30.0	1.6780681527030488	0.00454
1.9512	0.25939999999999985	2.0156	3.9668	2.275	168.0	30.0	1.9680492161143084	0.00421
1.6944	0.2023999999999999	1.8857	3.5801	2.0881	225.0	33.0	1.8985522617595587	0.0032266666666666667
1.7237000000000002	0.3204	1.8896	3.6133	2.21	195.0	45.0	1.9122036409822185	0.0034133333333333333
1.9805000000000001	0.19460000000000033	2.0195	4.0	2.2141	195.0	27.0	1.9806882891804904	0.0035949999999999997
2.0429	0.5190999999999999	1.7559	3.7988	2.275	231.0	78.0	2.1634489435617064	0.0033283333333333333
1.5908	0.13570000000000015	1.8955	3.4863	2.0312	147.0	15.0	1.8392508572935902	0.004665
2.3301	0.7191000000000001	1.625	3.9551	2.3441	204.0	90.0	2.433907692307692	0.004028333333333333
1.8925999999999998	0.26560000000000006	1.7656	3.6582	2.0312	204.0	39.0	2.0719302220208426	0.0035949999999999997
1.2451	0.12790000000000012	1.9033	3.1484	2.0312	120.0	15.0	1.654179582829822	0.00452
1.6309	0.3359000000000001	1.6953	3.3262	2.0312	162.0	42.0	1.9620126231345485	0.004161666666666667
2.082	0.5190999999999999	1.7559	3.8379	2.275	246.0	78.0	2.1857167264650608	0.00328
1.955	0.016100000000000003	1.9512	3.9062	1.9673	174.0	3.0	2.001947519475195	0.004096666666666666
1.5781	0.1328999999999998	1.9512	3.5293	2.0841	183.0	21.0	1.8087843378433786	0.0032500000000000003
1.7852000000000001	0.25970000000000004	1.8203	3.6055	2.08	225.0	42.0	1.9807174641542604	0.003178333333333334
1.6416000000000002	0.04709999999999992	1.8389	3.4805	1.886	183.0	9.0	1.8927075969329492	0.003313333333333333
1.5606	-0.00019999999999997797	1.6953	3.2559	1.6951	126.0	3.0	1.920545036276765	0.004953333333333334
1.9531	0.3940999999999999	1.625	3.5781	2.0191	225.0	60.0	2.2019076923076923	0.0036650000000000003
1.8885999999999998	0.0041999999999999815	1.7559	3.6445	1.7601	195.0	0.0	2.0755737798280083	0.0039
1.417	-0.0005999999999999339	1.8389	3.2559	1.8383	111.0	12.0	1.770569362118658	0.005258333333333334
1.7627000000000002	0.3881000000000001	1.501	3.2637	1.8891	267.0	78.0	2.174350433044637	0.0028966666666666667
1.4326000000000003	0.2631000000000001	1.626	3.0586	1.8891	189.0	45.0	1.881057810578106	0.00329
1.6319000000000001	-0.06959999999999988	1.8896	3.5215	1.82	153.0	-12.0	1.8636219305673158	0.00377
1.9638	0.2631000000000001	1.626	3.5898	1.8891	237.0	54.0	2.207749077490775	0.0028366666666666666
1.6211	0.06489999999999996	1.8242	3.4453	1.8891	189.0	9.0	1.8886635237364324	0.003848333333333333
1.1845999999999999	-0.06389999999999985	1.7549	2.9395	1.691	204.0	-30.0	1.6750242179041541	0.003615
1.7637	0.4575	1.4316	3.1953	1.8891	174.0	63.0	2.23197820620285	0.004448333333333334
2.4688000000000003	0.13070000000000004	2.1484	4.6172	2.2791	231.0	18.0	2.1491342394339976	0.003193333333333333
2.1758	-0.6357000000000002	2.3633	4.5391	1.7276	168.0	-81.0	1.9206617864849997	0.0036183333333333328
2.1162	0.476	1.5654	3.6816	2.0414	225.0	69.0	2.3518589497891913	0.0037833333333333334
1.9775	0.1673	1.8213	3.7988	1.9886	204.0	24.0	2.0857629165980343	0.003841666666666667
1.376	-0.2881	1.8857	3.2617	1.5976	111.0	-57.0	1.729702497746195	0.005458333333333333
2.0166	0.3317999999999999	1.8213	3.8379	2.1531	153.0	36.0	2.107231098665788	0.004688333333333333
1.7041	0.13339999999999996	1.8857	3.5898	2.0191	168.0	18.0	1.9036962401230313	0.0038650000000000004
1.9101000000000001	0.06529999999999991	1.7598	3.6699	1.8251	216.0	9.0	2.0854074326628025	0.00347
1.4336	0.0042999999999999705	1.8848	3.3184	1.8891	210.0	0.0	1.7606112054329373	0.002861666666666667
1.3564000000000003	0.06780000000000008	1.8213	3.1777	1.8891	183.0	12.0	1.7447427661560426	0.003115
2.2969	0.5838000000000001	1.6953	3.9922	2.2791	279.0	102.0	2.3548634459977587	0.002918333333333333
1.9531	0.19789999999999974	1.9512	3.9043	2.1491	216.0	30.0	2.0009737597375974	0.0031633333333333335
1.627	0.061799999999999855	1.8242	3.4512	1.886	168.0	9.0	1.8918978182216861	0.004195
2.1602	0.32379999999999987	1.6953	3.8555	2.0191	210.0	45.0	2.2742287500737333	0.003986666666666666
2.3955	0.05600000000000005	1.96	4.3555	2.016	330.0	12.0	2.2221938775510206	0.002416666666666667
1.4961000000000002	-0.16259999999999986	2.0801	3.5762	1.9175	162.0	-51.0	1.7192442671025434	0.0033449999999999994
1.7735000000000003	0.12020000000000008	2.0898	3.8633	2.21	183.0	18.0	1.8486458034261655	0.0033466666666666666
1.5	-0.20379999999999998	2.0898	3.5898	1.886	141.0	-6.0	1.717772035601493	0.00397
1.6231	0.18659999999999988	2.0234	3.6465	2.21	174.0	27.0	1.802164673322131	0.00338
1.4980999999999998	0.19489999999999985	1.8242	3.3223	2.0191	174.0	27.0	1.82123670650148	0.0036566666666666666
1.8330000000000002	0.32779999999999987	1.8213	3.6543	2.1491	153.0	36.0	2.006423982869379	0.00443
1.5801	0.1298999999999999	1.8242	3.4043	1.9541	168.0	18.0	1.8661879179914482	0.003705
1.8906	0.3207	1.6953	3.5859	2.016	225.0	51.0	2.115200849407185	0.003375
1.5107000000000002	0.3892	1.6299	3.1406	2.0191	231.0	69.0	1.9268666789373583	0.003055
1.6376999999999997	0.22489999999999988	1.5596	3.1973	1.7845	204.0	36.0	2.0500769428058474	0.0037733333333333334
1.8858000000000001	0.39369999999999994	1.6904	3.5762	2.0841	189.0	57.0	2.1155939422621866	0.0037133333333333337
1.6288999999999998	-0.15470000000000006	1.8203	3.4492	1.6656	111.0	-6.0	1.89485249684118	0.006015
2.2715	0.45379999999999976	1.6953	3.9668	2.1491	174.0	48.0	2.3398808470477204	0.004978333333333334
1.6231	0.32379999999999987	1.6953	3.3184	2.0191	246.0	63.0	1.957411667551466	0.002825
1.9619	0.4052000000000002	1.626	3.5879	2.0312	225.0	66.0	2.206580565805658	0.0033116666666666668
2.083	0.2496999999999998	1.7744	3.8574	2.0241	210.0	36.0	2.173917944093778	0.003631666666666667
1.834	0.0849000000000002	2.0195	3.8535	2.1044	279.0	15.0	1.9081455805892549	0.0026883333333333334
1.4951	-0.01419999999999999	1.9033	3.3984	1.8891	141.0	-48.0	1.7855303945778385	0.003938333333333334
1.957	0.24249999999999994	1.5176	3.4746	1.7601	225.0	42.0	2.2895361096468108	0.003631666666666667
1.3730999999999998	0.05840000000000001	1.6367	3.0098	1.6951	126.0	6.0	1.8389442170220565	0.0051400000000000005
1.6123	0.20110000000000006	1.9033	3.5156	2.1044	195.0	33.0	1.8471076551253087	0.0029366666666666664
1.9600000000000002	0.1944999999999999	1.8896	3.8496	2.0841	189.0	27.0	2.037256562235394	0.0038399999999999997
1.5195000000000003	0.013600000000000279	2.0664	3.5859	2.08	126.0	0.0	1.735336817653891	0.004881666666666667
2.5918	0.583	1.8301	4.4219	2.4131	225.0	72.0	2.416206764657669	0.0037816666666666667
1.6366999999999998	0.3881999999999999	2.3418	3.9785	2.73	183.0	48.0	1.6989068238107439	0.0032
1.7715	0.4516	2.1484	3.9199	2.6	162.0	51.0	1.8245671197169988	0.0036966666666666667
1.5478	0.1937000000000002	1.8213	3.3691	2.015	189.0	30.0	1.8498325371987043	0.0032783333333333336
2.0419	0.42020000000000013	1.7979	3.8398	2.2181	288.0	87.0	2.1357138884253852	0.002435
1.1679999999999997	-0.3609	2.1484	3.3164	1.7875	120.0	-6.0	1.5436603984360453	0.0037950000000000006
2.1152	0.45409999999999995	1.7559	3.8711	2.21	168.0	48.0	2.2046244091349165	0.004788333333333333
1.8222999999999998	0.1137999999999999	2.0312	3.8535	2.145	141.0	12.0	1.8971543914927136	0.004458333333333333
2.2890999999999995	0.5768999999999997	2.0312	4.3203	2.6081	183.0	60.0	2.1269692792437964	0.0041266666666666665
3.0508	0.7877999999999998	1.8203	4.8711	2.6081	393.0	150.0	2.6759874745921004	0.0023883333333333335
1.5508000000000002	-0.23880000000000035	2.6133	4.1641	2.3745	189.0	9.0	1.5934259365553132	0.0022316666666666665
1.7578999999999998	0.06820000000000004	2.2109	3.9688	2.2791	153.0	9.0	1.7951060654032294	0.003833333333333333
2.0625	0.16000000000000014	2.0195	4.082	2.1795	288.0	33.0	2.0212923991086904	0.0023683333333333334
1.9746000000000001	0.12880000000000003	1.9512	3.9258	2.08	204.0	18.0	2.0119926199261995	0.003361666666666667
1.6816	0.05390000000000006	2.1602	3.8418	2.2141	153.0	6.0	1.778446440144431	0.004218333333333333
1.7207	0.06849999999999978	2.0156	3.7363	2.0841	147.0	9.0	1.8536912085731294	0.004413333333333333
1.7734999999999999	0.2515999999999998	2.0234	3.7969	2.275	174.0	36.0	1.8764950084017	0.0033733333333333337
1.9961	0.18490000000000006	1.8301	3.8262	2.015	273.0	36.0	2.090705425933009	0.002718333333333333
2.7041000000000004	0.11099999999999977	1.9131	4.6172	2.0241	399.0	33.0	2.4134650567142337	0.0017333333333333335
2.0782	-0.4217000000000002	2.4062	4.4844	1.9845	162.0	21.0	1.863685479178788	0.003911666666666667
1.7637000000000005	0.13770000000000016	2.2754	4.0391	2.4131	126.0	15.0	1.7751164630394658	0.004261666666666666
2.0137	0.1990000000000003	2.0801	4.0938	2.2791	168.0	21.0	1.9680784577664536	0.00412
2.7284999999999995	0.19379999999999997	2.1543	4.8828	2.3481	321.0	36.0	2.2665366940537526	0.0024416666666666666
1.7442000000000002	0.3212999999999999	2.041	3.7852	2.3623	174.0	39.0	1.854581087702107	0.003748333333333333
1.6191	0.19430000000000014	2.2188	3.8379	2.4131	183.0	27.0	1.7297187669010277	0.003065
1.8995000000000002	0.32840000000000025	1.8857	3.7852	2.2141	189.0	45.0	2.007318237259373	0.0035700000000000003
1.9472	0.27829999999999977	2.084	4.0312	2.3623	225.0	39.0	1.9343570057581574	0.00315
2.4688	0.4624999999999999	2.0156	4.4844	2.4781	309.0	81.0	2.224846199642786	0.002515
1.9658000000000002	0.3256000000000001	1.6904	3.6562	2.016	204.0	45.0	2.1629200189304307	0.003974999999999999
1.8252	0.25540000000000007	1.8896	3.7148	2.145	210.0	39.0	1.9659187129551228	0.0033449999999999994
1.7538999999999998	0.20379999999999976	1.8203	3.5742	2.0241	147.0	24.0	1.9635224962918199	0.004471666666666666
1.6366999999999998	0.07249999999999979	2.0156	3.6523	2.0881	162.0	9.0	1.8120162730700535	0.00404
1.4491999999999998	0.19989999999999997	1.6953	3.1445	1.8952	105.0	18.0	1.8548339526927387	0.006033333333333333
2.0751999999999997	0.4487000000000001	1.3896	3.4648	1.8383	153.0	45.0	2.4933793897524468	0.006188333333333334
1.9042999999999999	0.07479999999999998	1.6914	3.5957	1.7662	132.0	6.0	2.125872058649639	0.006059999999999999
2.1338	0.25780000000000003	1.6455	3.7793	1.9033	153.0	27.0	2.29674870859921	0.005396666666666667
1.8858000000000001	0.39480000000000004	1.5654	3.4512	1.9602	246.0	75.0	2.2046761211192027	0.0029983333333333333
1.6328	0.19069999999999987	1.6953	3.3281	1.886	168.0	27.0	1.9631333687252994	0.003793333333333333
1.4834	0.13000000000000012	1.626	3.1094	1.756	147.0	18.0	1.9123001230012302	0.0046433333333333335
1.5166	-0.000500000000000167	1.5615	3.0781	1.561	147.0	-15.0	1.9712455971821965	0.0042
1.9882999999999997	0.4968999999999999	1.4531	3.4414	1.95	258.0	90.0	2.368316014038951	0.0032649999999999997
1.6952999999999998	-0.00039999999999995595	1.6914	3.3867	1.691	126.0	-0.0	2.0023057821922667	0.004973333333333333
1.5742000000000003	-0.4040999999999999	2.2891	3.8633	1.885	120.0	-21.0	1.6876938534795336	0.004195
1.542	0.0	1.9033	3.4453	1.9033	132.0	0.0	1.8101718068617665	0.00476
2.1738	0.3281999999999998	1.7559	3.9297	2.0841	246.0	51.0	2.2379976080642403	0.0034033333333333333
1.4775	-0.009800000000000031	1.9131	3.3906	1.9033	141.0	-18.0	1.7723067273012387	0.004318333333333333
1.6914	0.2562	1.7598	3.4512	2.016	153.0	30.0	1.9611319468121378	0.004656666666666667
2.0888999999999998	0.5939999999999999	1.3662	3.4551	1.9602	225.0	93.0	2.5289855072463765	0.003908333333333333
1.8905999999999998	-0.10170000000000012	1.8242	3.7148	1.7225	126.0	12.0	2.0363995175967546	0.005178333333333333
1.3232	-0.1399999999999999	1.96	3.2832	1.82	183.0	6.0	1.6751020408163264	0.0033183333333333333
1.7979	0.4345000000000001	1.6455	3.4434	2.08	168.0	51.0	2.092616226071103	0.00458
1.6288999999999998	0.1943999999999999	2.0156	3.6445	2.21	141.0	24.0	1.8081464576304822	0.0040616666666666666
2.5792	0.3367000000000002	1.8896	4.4688	2.2263	195.0	39.0	2.364944961896698	0.004218333333333333
2.6298999999999997	0.5834999999999999	1.5615	4.1914	2.145	342.0	108.0	2.6842138968940117	0.0029200000000000003
1.5937999999999999	-0.2401000000000002	2.2246	3.8184	1.9845	153.0	-24.0	1.716443405556055	0.0034
1.4121	0.09170000000000011	1.9883	3.4004	2.08	183.0	15.0	1.7102046974802594	0.0033083333333333337
1.8506000000000002	0.08100000000000018	1.9502	3.8008	2.0312	231.0	12.0	1.948928315044611	0.0030499999999999998
2.3975	0.6397999999999999	1.9033	4.3008	2.5431	330.0	120.0	2.2596542846634793	0.002421666666666667
1.8282000000000003	0.3382999999999998	2.2109	4.0391	2.5492	237.0	54.0	1.8269030711474965	0.00267
1.9619000000000002	0.19510000000000005	1.7549	3.7168	1.95	183.0	24.0	2.117955439056357	0.0041533333333333335
1.9511999999999996	0.27269999999999994	2.1465	4.0977	2.4192	162.0	30.0	1.9090146750524106	0.003993333333333333
1.8203	0.2631999999999999	2.2109	4.0312	2.4741	189.0	33.0	1.823329865665566	0.003385
1.5761000000000003	0.06490000000000018	2.0801	3.6562	2.145	288.0	15.0	1.7577039565405512	0.002048333333333333
2.0206	0.3204	1.8896	3.9102	2.21	279.0	69.0	2.0693268416596107	0.0023116666666666667
1.4463	-0.1632	1.8857	3.332	1.7225	153.0	-21.0	1.7669830832051758	0.0037950000000000006
1.6913999999999998	0.059499999999999886	1.7656	3.457	1.8251	225.0	9.0	1.9579746261893973	0.0035100000000000005
1.8272000000000002	0.058599999999999985	1.8955	3.7227	1.9541	162.0	6.0	1.9639672909522554	0.004351666666666667
1.9766	0.06569999999999987	1.8203	3.7969	1.886	174.0	9.0	2.0858649673130802	0.004576666666666667
1.9404000000000001	0.4425999999999999	1.6455	3.5859	2.0881	246.0	75.0	2.1792160437556976	0.0031483333333333333
1.6991999999999998	0.2753000000000001	1.7559	3.4551	2.0312	225.0	45.0	1.9677088672475653	0.0031883333333333334
1.7627000000000002	0.3290000000000002	1.9541	3.7168	2.2831	189.0	45.0	1.9020520955938796	0.0034883333333333337
1.8944999999999999	0.2751000000000001	1.9512	3.8457	2.2263	183.0	36.0	1.970940959409594	0.003691666666666667
1.4941	-0.001200000000000312	2.1543	3.6484	2.1531	120.0	33.0	1.6935431462656083	0.0046500000000000005
1.5663999999999998	0.20250000000000012	2.0156	3.582	2.2181	174.0	30.0	1.7771383210954552	0.0031799999999999997
1.8925999999999998	0.26690000000000014	1.9512	3.8438	2.2181	195.0	36.0	1.9699671996719965	0.003483333333333333
1.6328	0.1296999999999997	2.0234	3.6562	2.1531	147.0	15.0	1.8069585845606404	0.004315
1.7881	0.12590000000000012	1.9541	3.7422	2.08	174.0	15.0	1.915050406836907	0.0038283333333333333
1.0858999999999996	-0.7058000000000002	2.3633	3.4492	1.6575	147.0	-144.0	1.4594846189650064	0.0028333333333333335
1.6416000000000002	0.32110000000000016	1.6299	3.2715	1.951	183.0	45.0	2.0071783545002764	0.004003333333333334
1.8319999999999999	0.46309999999999985	1.625	3.457	2.0881	210.0	72.0	2.1273846153846154	0.003466666666666667
1.6299000000000001	0.3237000000000001	1.8213	3.4512	2.145	195.0	45.0	1.8949102289573383	0.0036049999999999997
1.8924999999999998	0.45430000000000015	1.7598	3.6523	2.2141	225.0	72.0	2.0754062961700193	0.0031383333333333333
1.83	0.2751000000000001	1.9512	3.7812	2.2263	147.0	27.0	1.9378843788437885	0.004686666666666667
2.0869	0.19309999999999983	1.96	4.0469	2.1531	132.0	18.0	2.0647448979591836	0.005495
1.7285	0.07249999999999979	2.0156	3.7441	2.0881	210.0	12.0	1.857561024012701	0.0029233333333333333
2.0088	0.5094999999999998	1.8955	3.9043	2.405	288.0	99.0	2.0597731469269323	0.0024033333333333333
1.5039000000000002	-9.999999999976694e-05	2.0801	3.584	2.08	174.0	39.0	1.7229940868227491	0.003105
1.7666000000000002	0.3895000000000002	1.8896	3.6562	2.2791	189.0	51.0	1.9349068585944116	0.00362
1.2988	0.1301000000000001	2.084	3.3828	2.2141	126.0	15.0	1.6232245681381958	0.0040216666666666664
2.0869	0.39280000000000026	1.8213	3.9082	2.2141	210.0	57.0	2.1458299017185527	0.003433333333333333
1.4424000000000001	0.06499999999999995	1.9541	3.3965	2.0191	126.0	6.0	1.7381403203520804	0.0047350000000000005
1.8448	0.1984999999999999	1.8896	3.7344	2.0881	153.0	21.0	1.9762912785774767	0.00473
1.9033	0.25759999999999983	1.8955	3.7988	2.1531	141.0	24.0	2.0041150092323927	0.0052966666666666665
1.5713000000000001	0.20890000000000009	1.8955	3.4668	2.1044	132.0	21.0	1.8289633342126088	0.004875
1.7108999999999999	0.1379999999999999	1.5723	3.2832	1.7103	189.0	21.0	2.0881511161991986	0.0041783333333333325
1.8975	0.3668999999999998	1.6572	3.5547	2.0241	210.0	57.0	2.145003620564808	0.0035033333333333336
1.9765000000000001	0.15470000000000006	1.7344	3.7109	1.8891	162.0	18.0	2.139587177121771	0.0049050000000000005
1.6738	0.38569999999999993	1.9766	3.6504	2.3623	162.0	42.0	1.84680764949914	0.004158333333333333
1.6006000000000002	0.2007000000000001	1.8955	3.4961	2.0962	168.0	27.0	1.8444209970983911	0.0035566666666666667
1.9609	0.32410000000000005	1.7559	3.7168	2.08	231.0	51.0	2.116749245401219	0.0032716666666666666
1.8885999999999998	0.19789999999999974	1.9512	3.8398	2.1491	204.0	30.0	1.9679171791717915	0.0032316666666666665
1.7207	0.1301000000000001	2.084	3.8047	2.2141	168.0	15.0	1.8256717850287907	0.0037266666666666663
1.8243	0.38960000000000017	2.0195	3.8438	2.4091	237.0	66.0	1.9033424114879922	0.0026616666666666668
1.3281999999999998	0.26069999999999993	2.1484	3.4766	2.4091	153.0	36.0	1.618227518153044	0.0033083333333333337
2.4873000000000003	-0.19330000000000003	1.8213	4.3086	1.628	252.0	-27.0	2.3656728710261903	0.002988333333333333
