# Supplementary figures and images for: Initiation of chromosome replication controls both division and replication cycles in E. coli through a double-adder mechanism
Source: eLife journal article supplement (doi:10.7554/elife.48063), 2019-11-11

# Double-adder Experimental

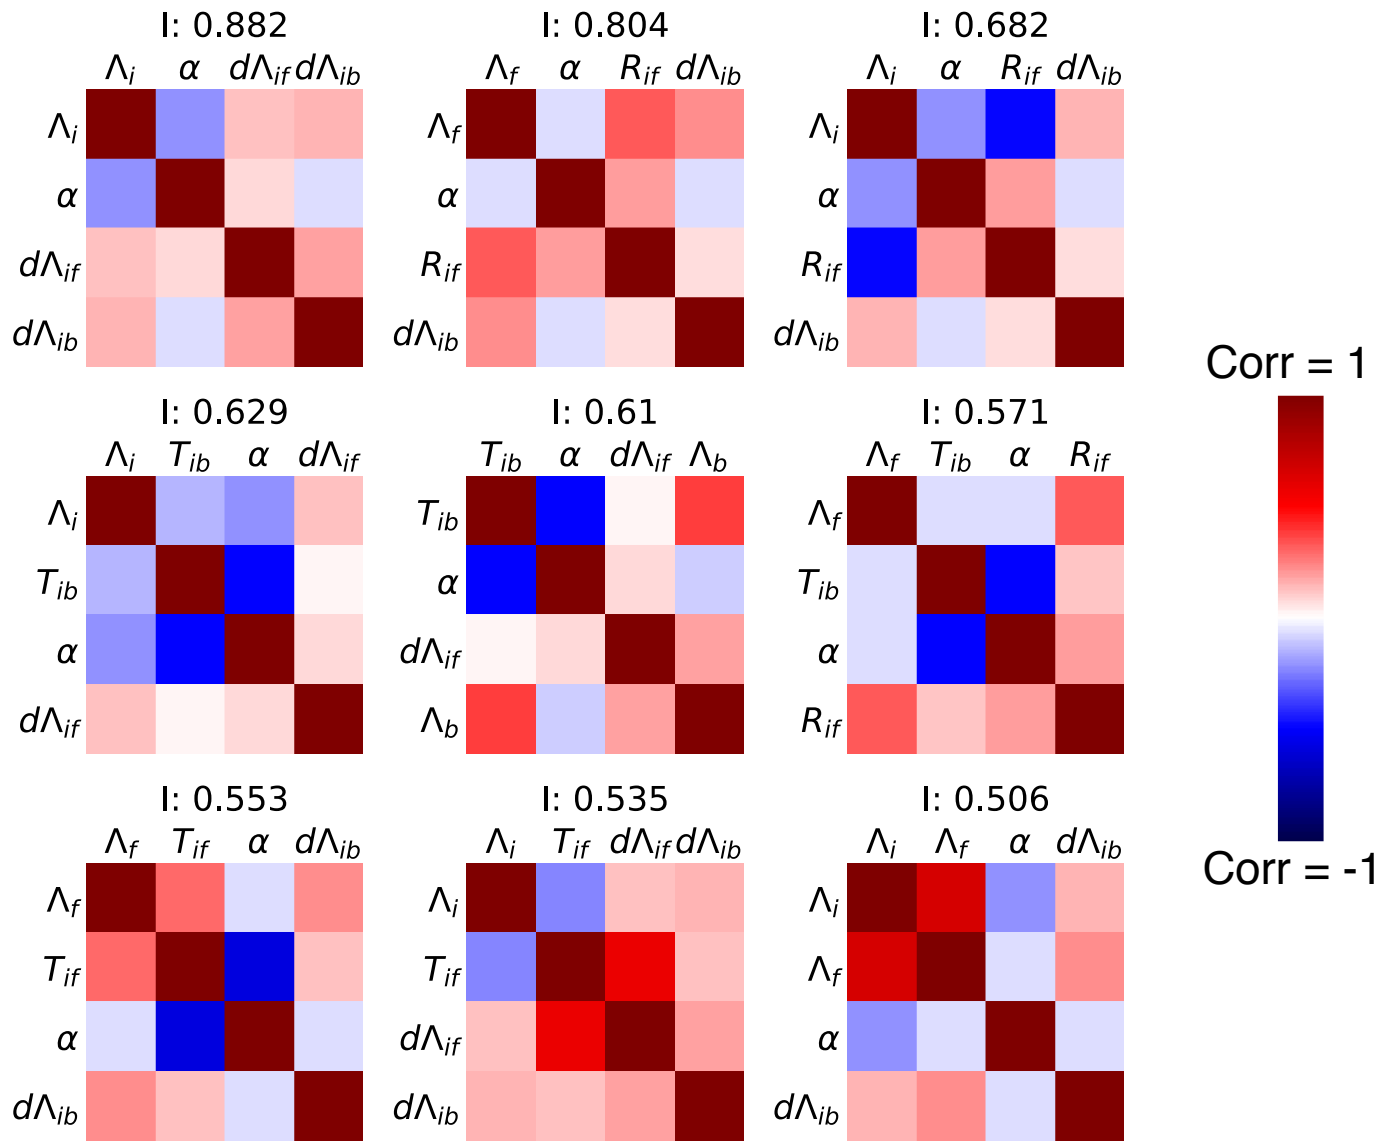

Supplement: supp [file elife-48063-supp-v1.zip › elife_poa_e48063_Figure_7_figure_supplement_1.pdf]

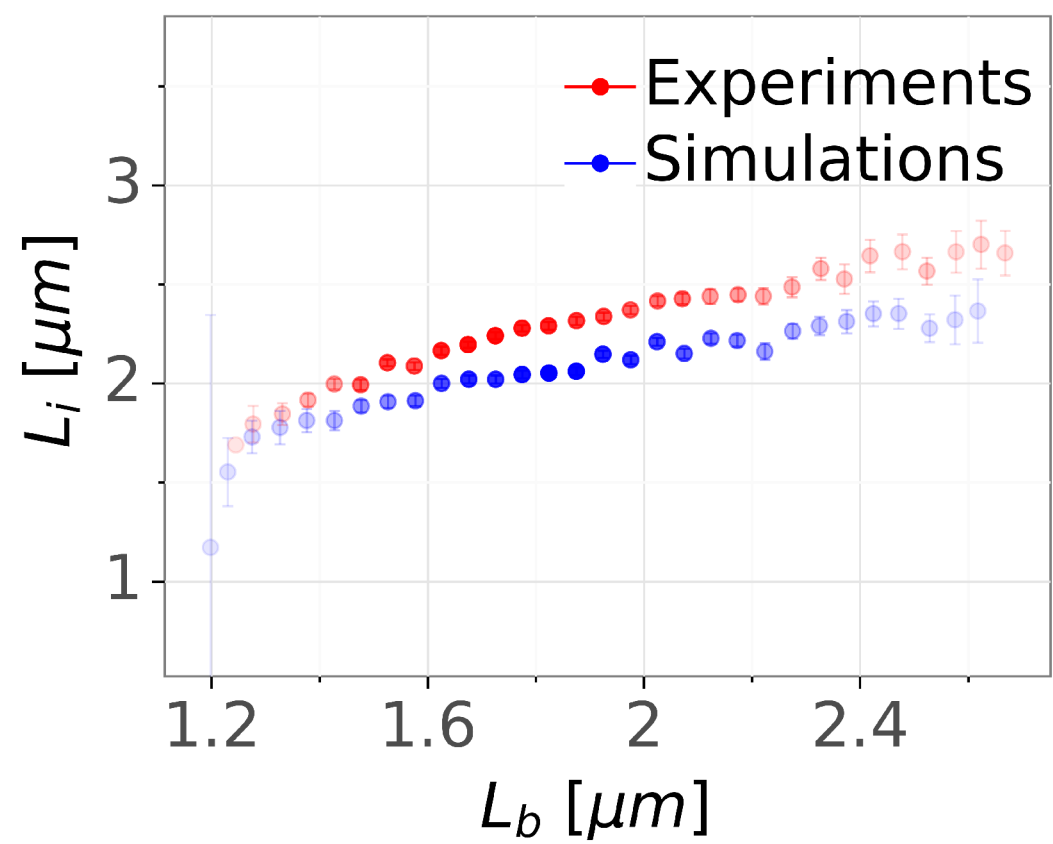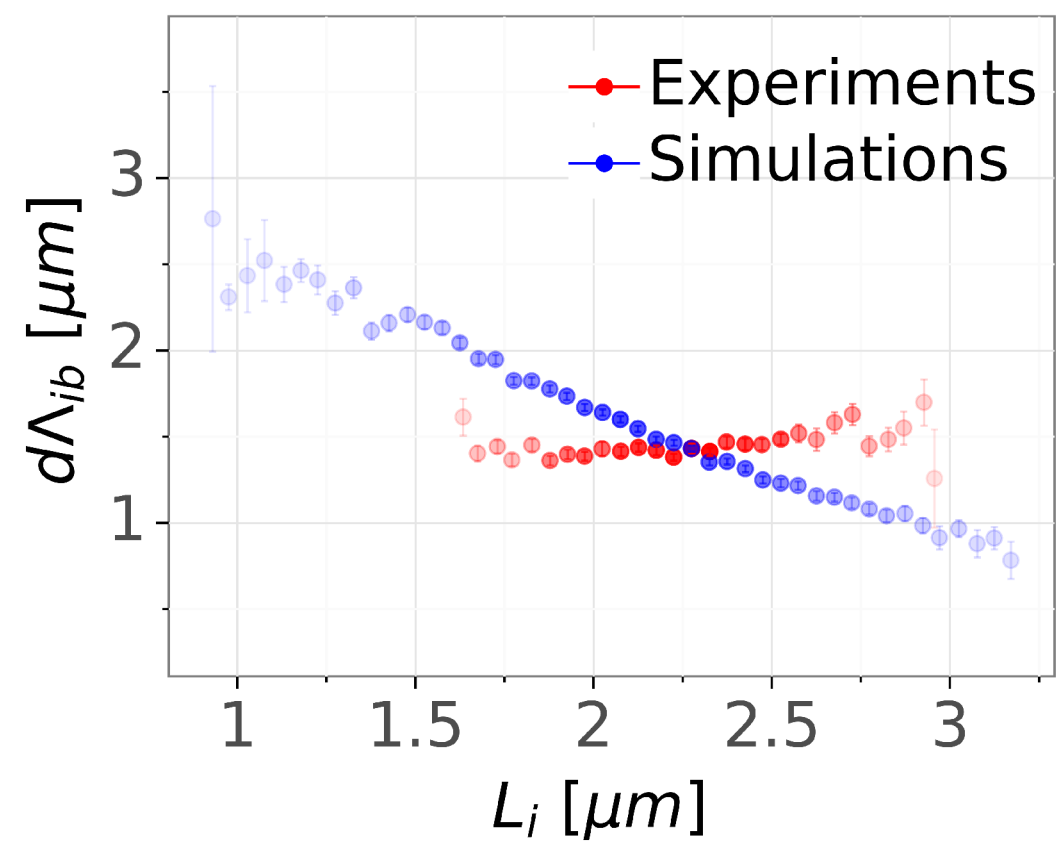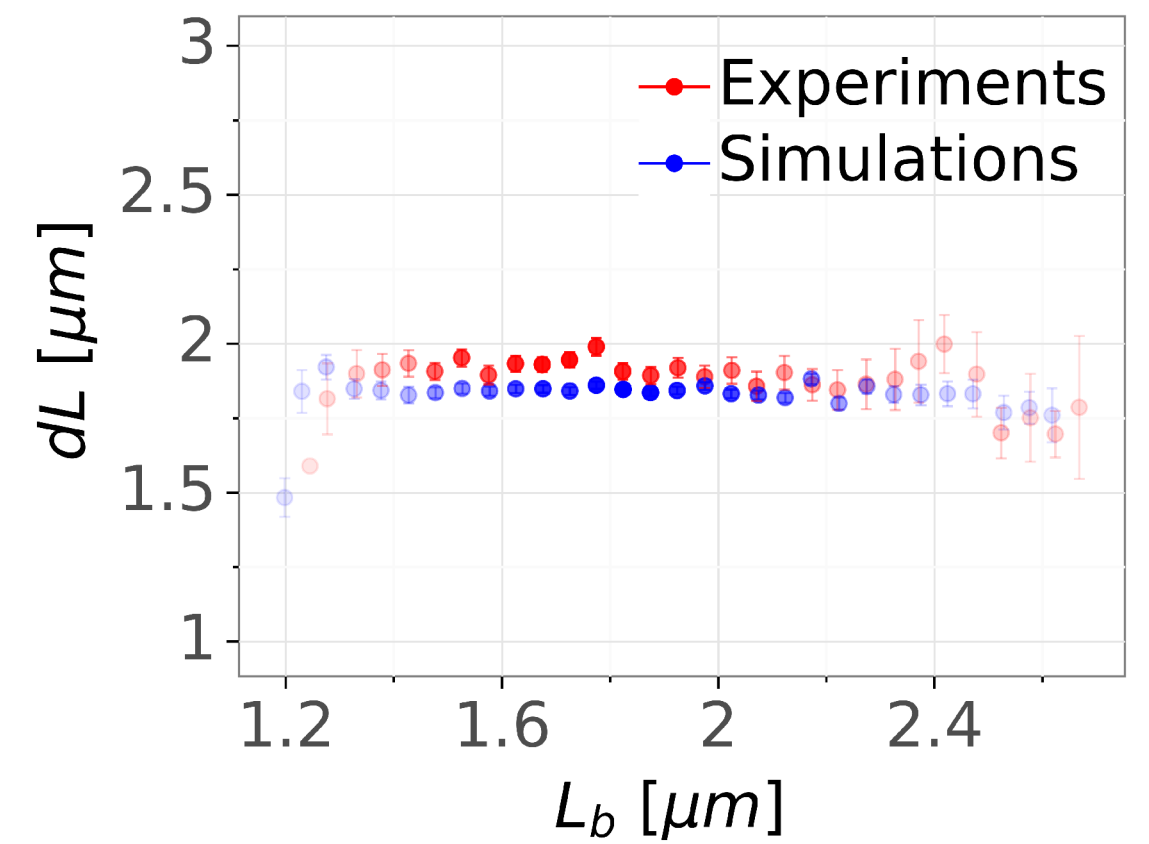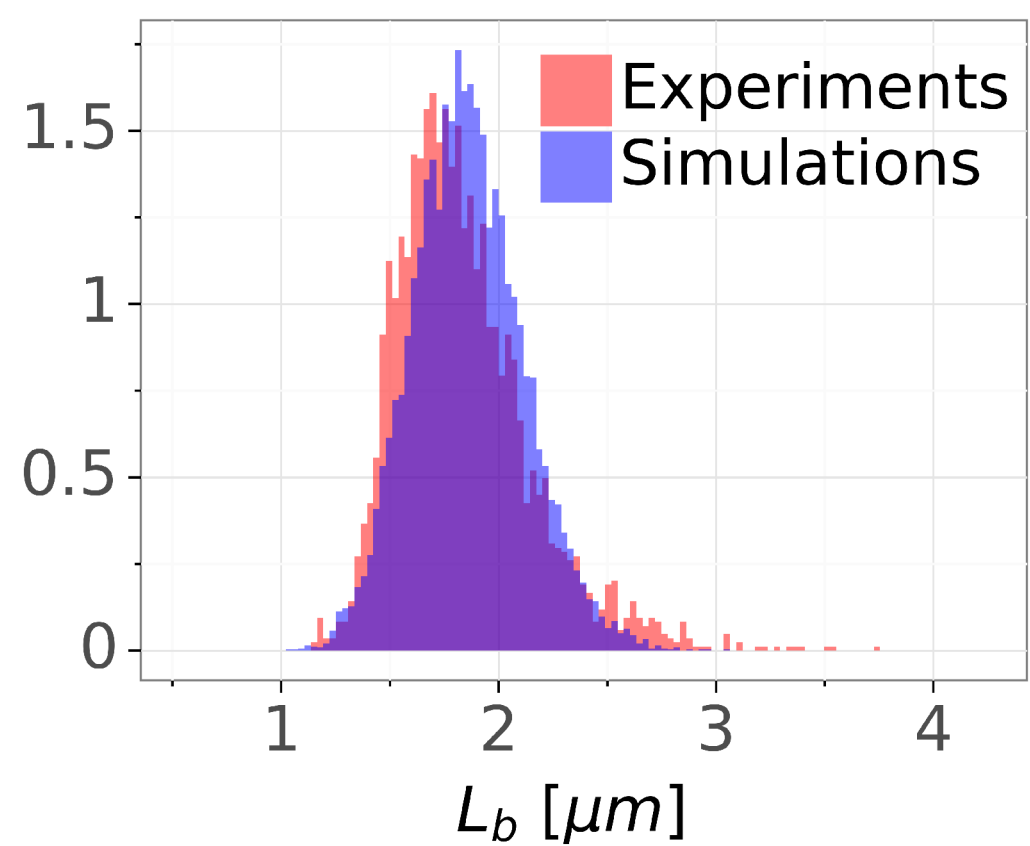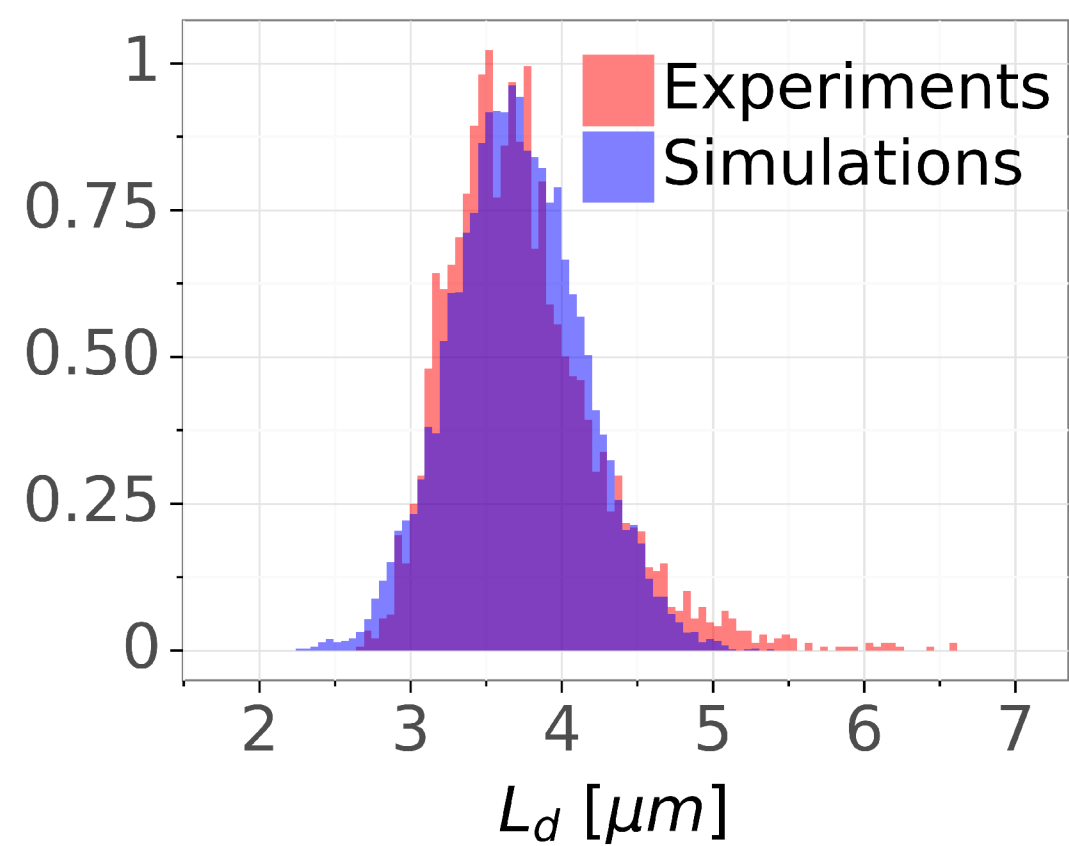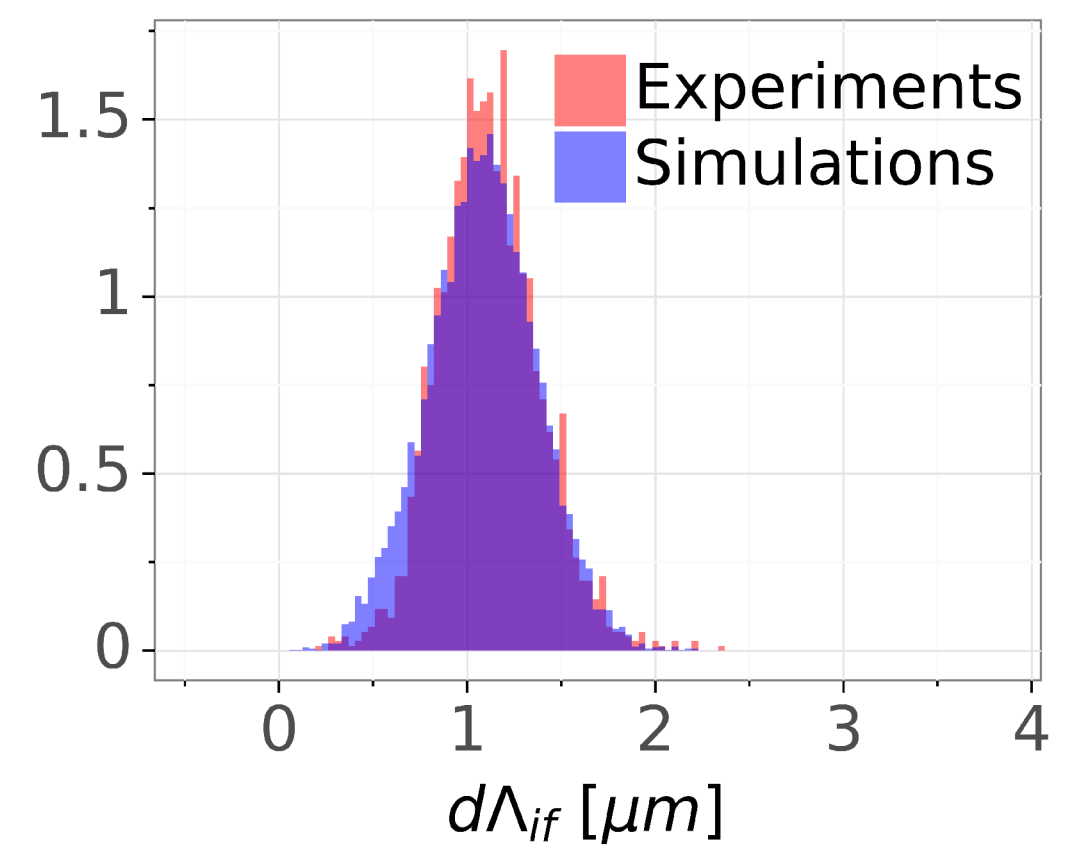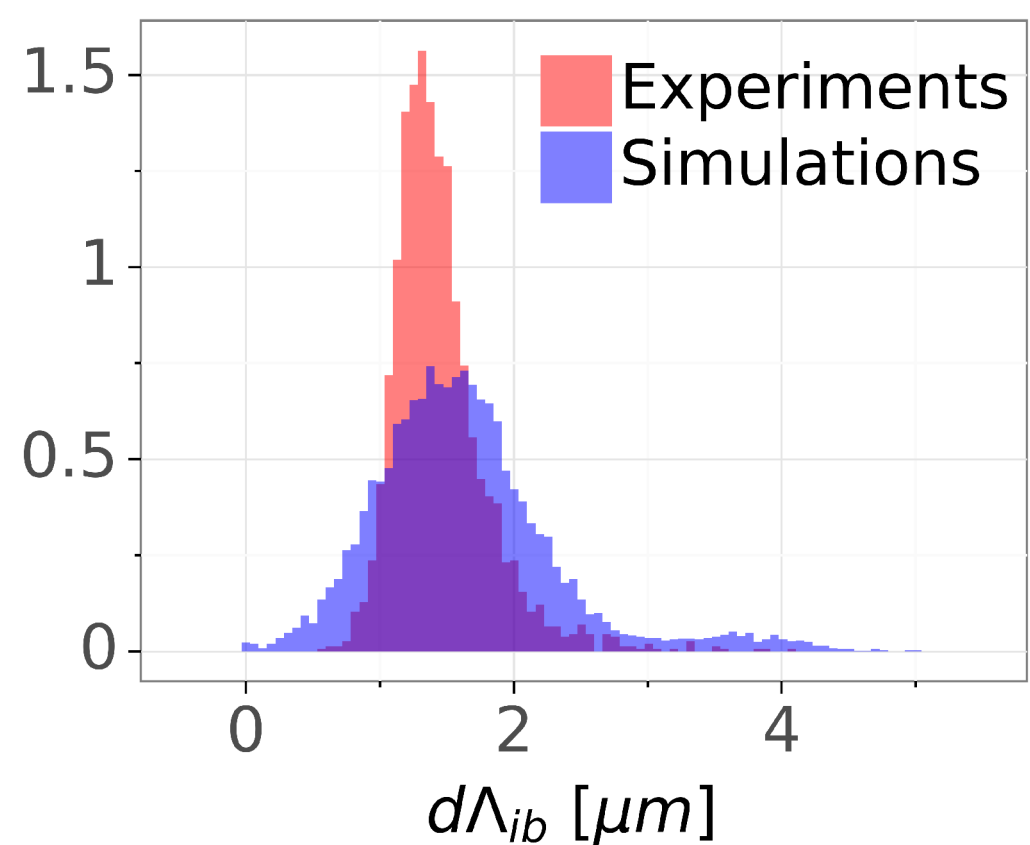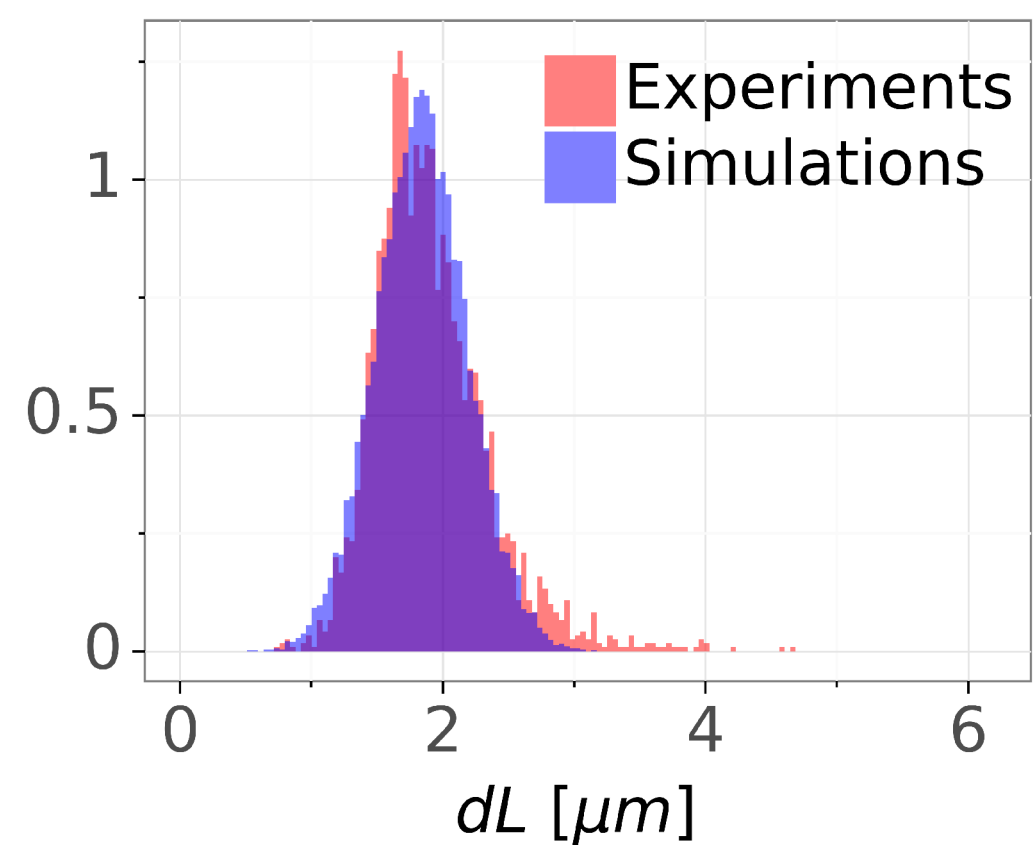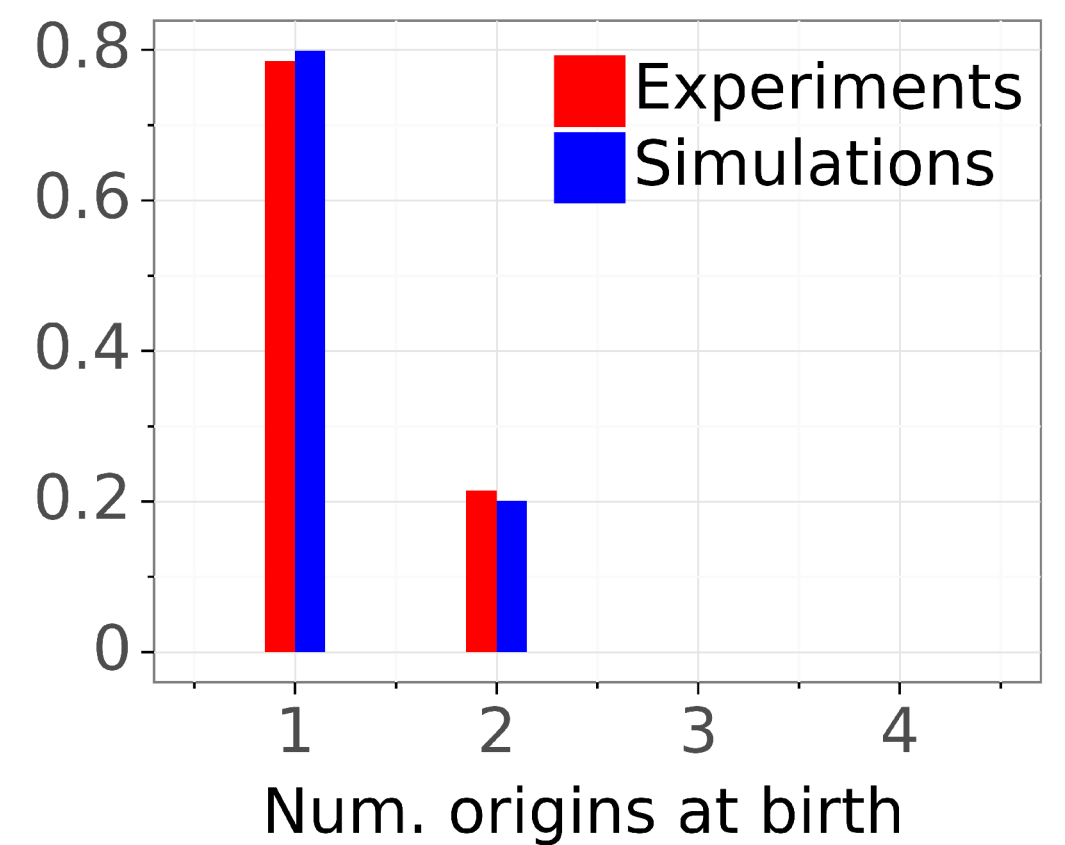

Supplement: supp [file elife-48063-supp-v1.zip › elife_poa_e48063_Appendix_2_figure_2.pdf]

A

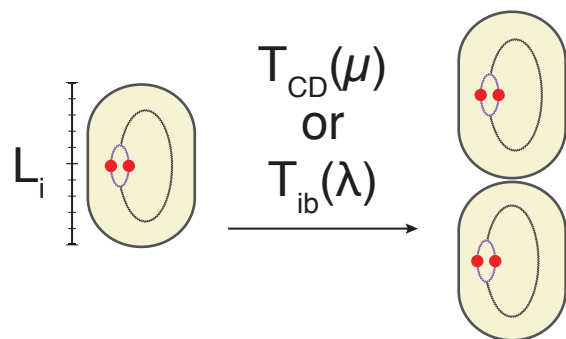

B

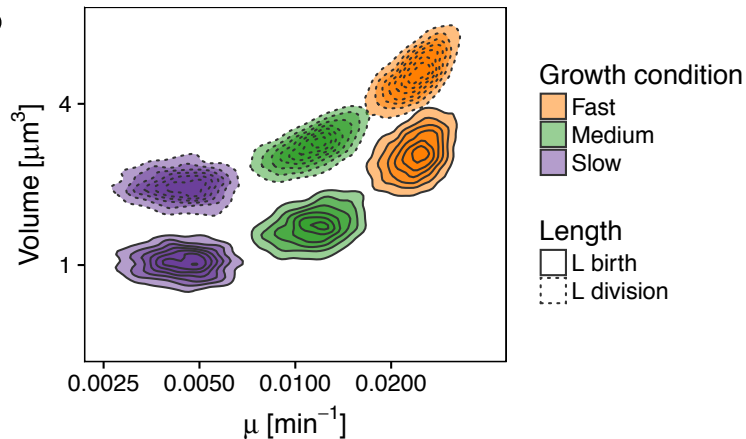

C

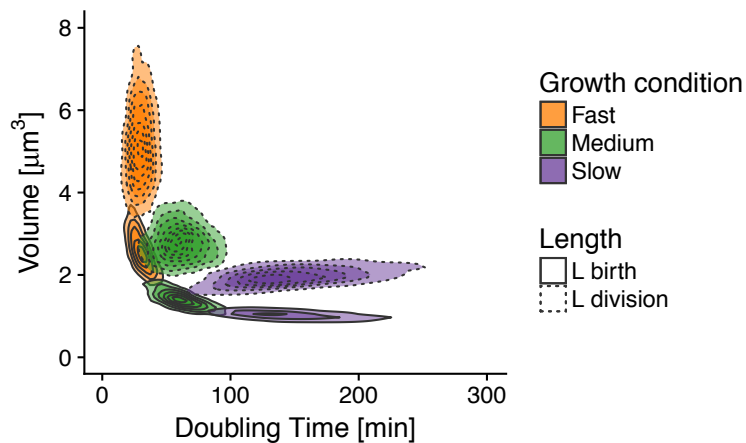

D

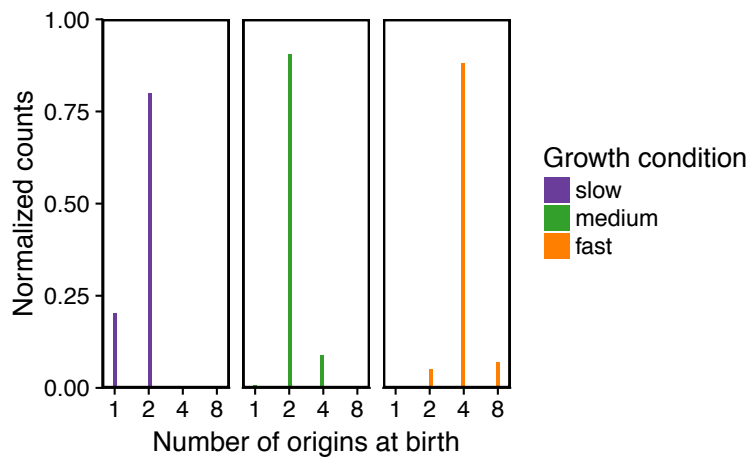

Supplement: supp [file elife-48063-supp-v1.zip › elife_poa_e48063_Appendix_2_figure_1.pdf]

# division-centric

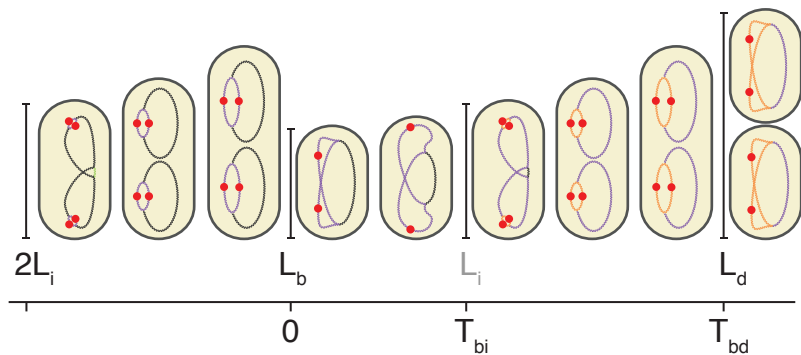

# replication-centric

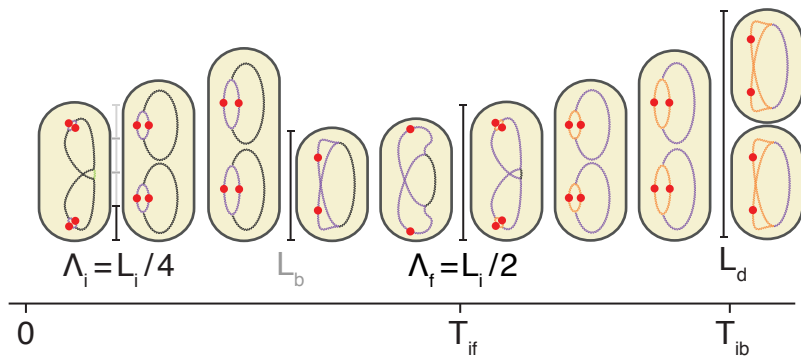

Supplement: supp [file elife-48063-supp-v1.zip › elife_poa_e48063_Figure_1_figure_supplement_1.pdf]

# Double-adder Simulation

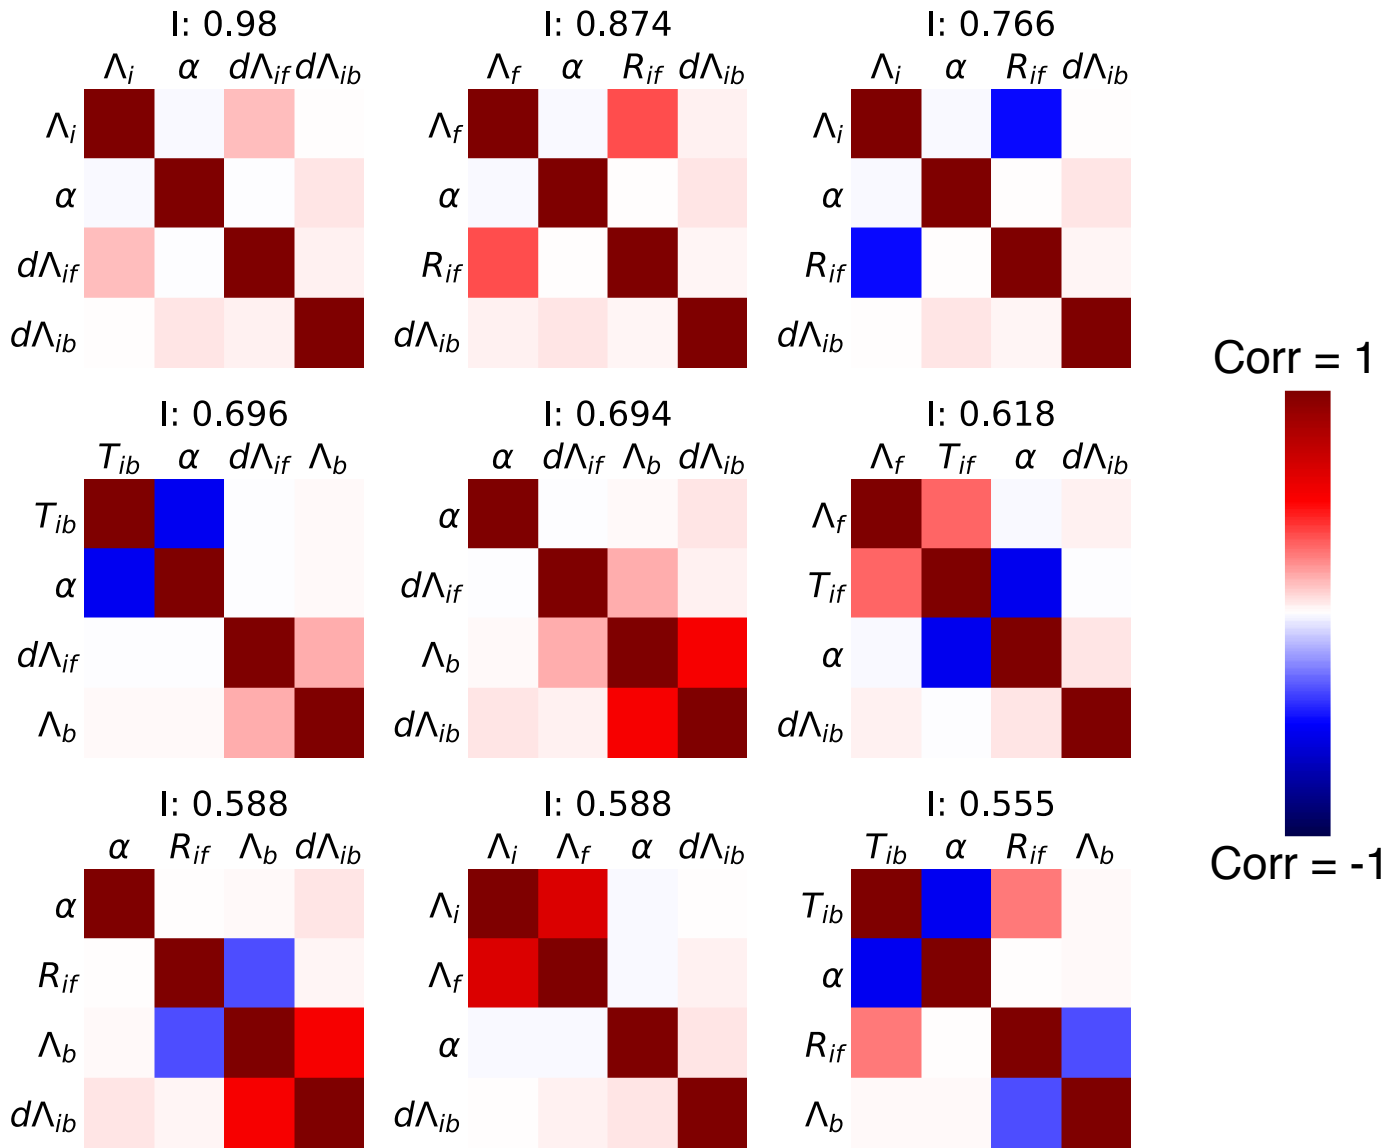

Supplement: supp [file elife-48063-supp-v1.zip › elife_poa_e48063_Figure_7_figure_supplement_2.pdf]

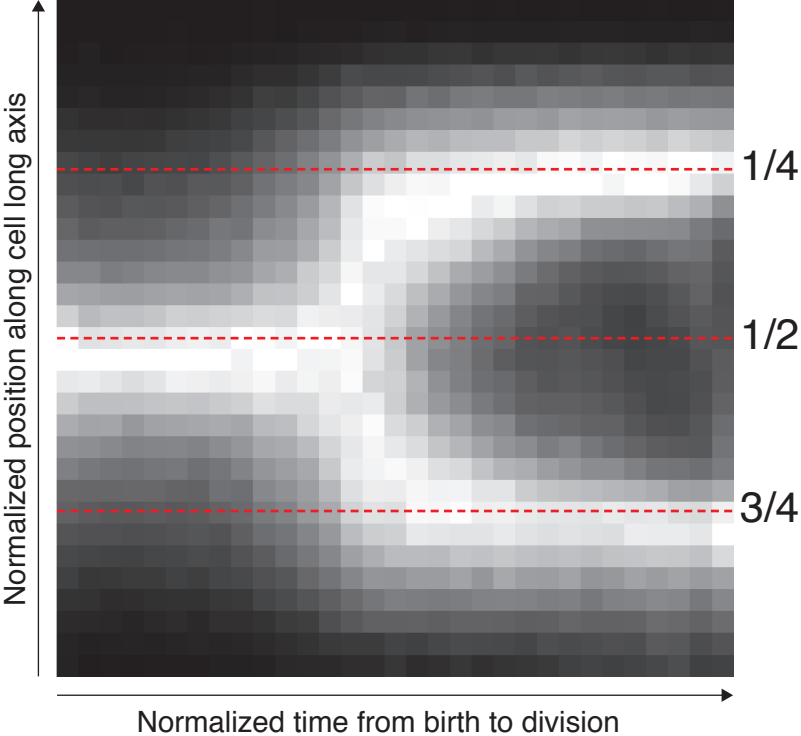

Supplement: supp [file elife-48063-supp-v1.zip › elife_poa_e48063_Figure_4_figure_supplement_1.pdf]

# Division Adder Experimental

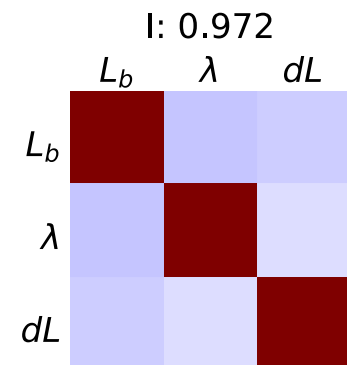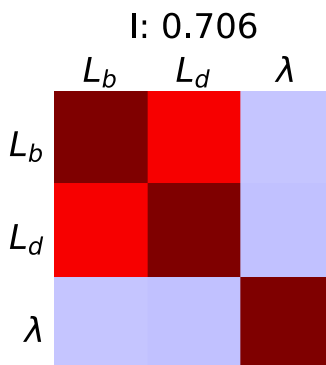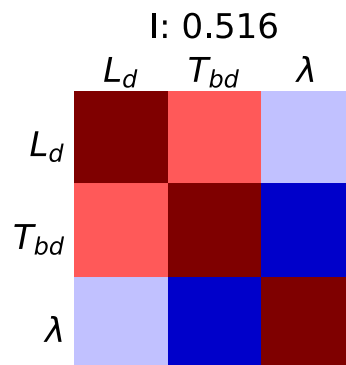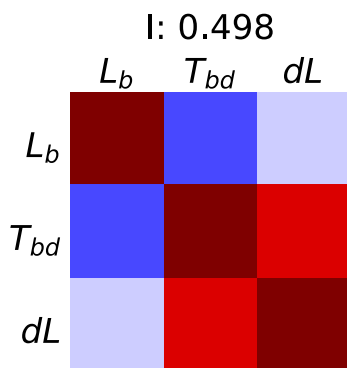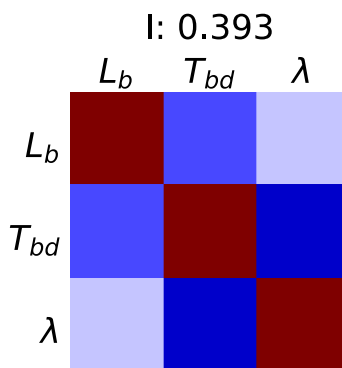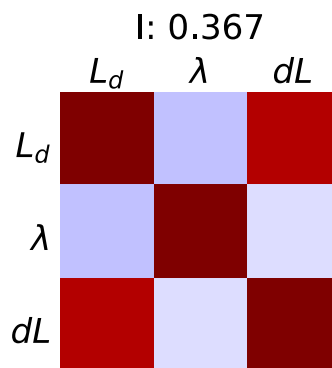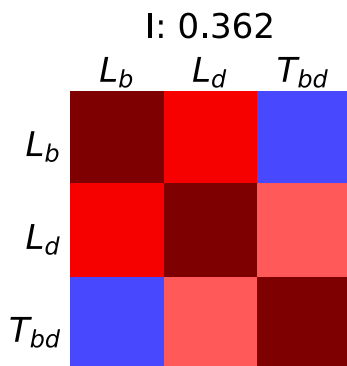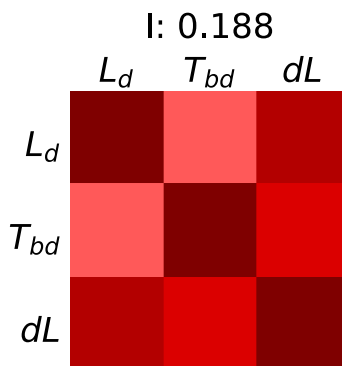

Corr = 1

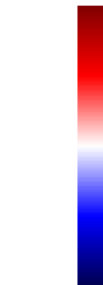

Corr = -1

Supplement: supp [file elife-48063-supp-v1.zip › elife_poa_e48063_Figure_6_figure_supplement_1.pdf]

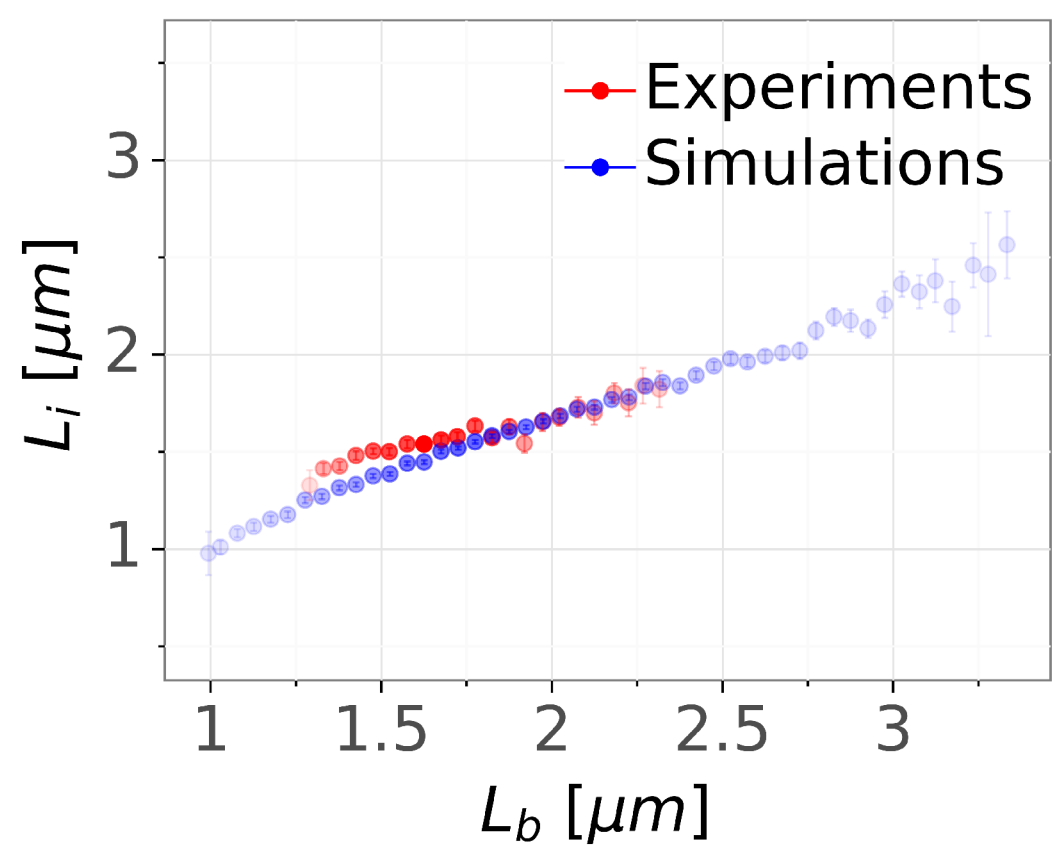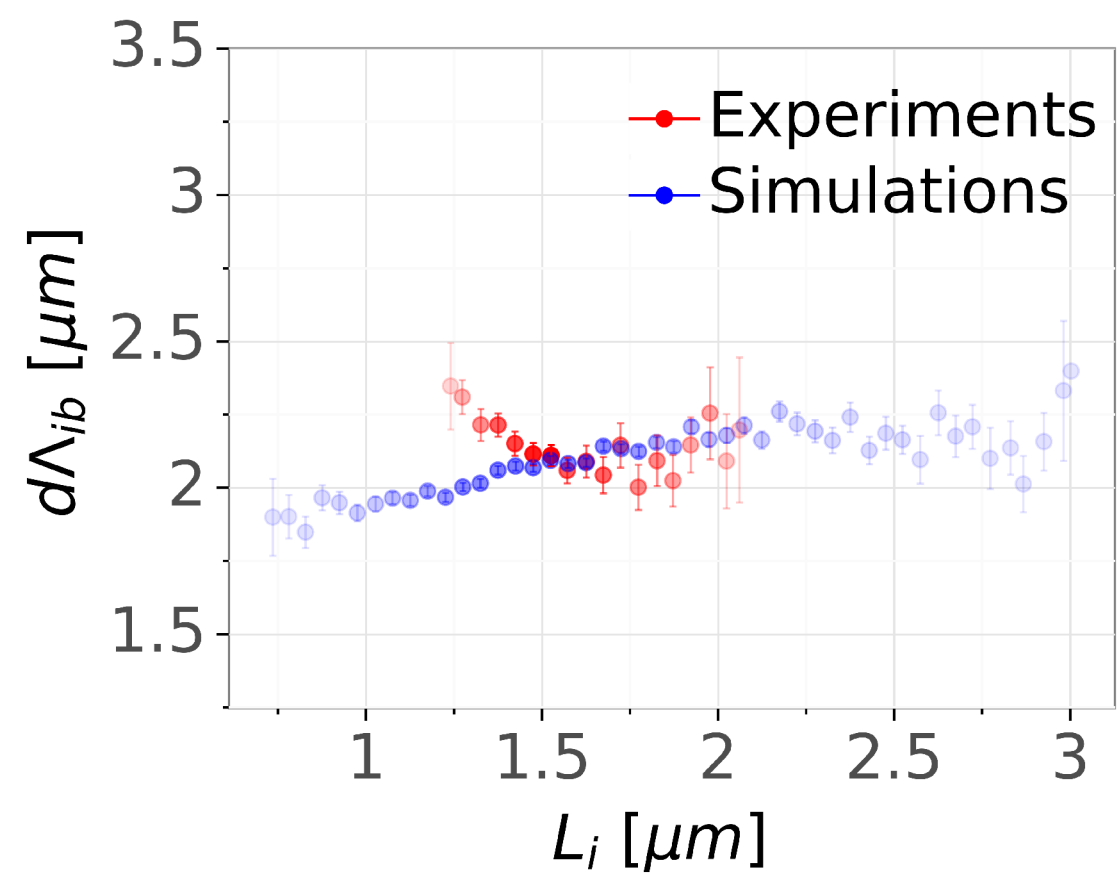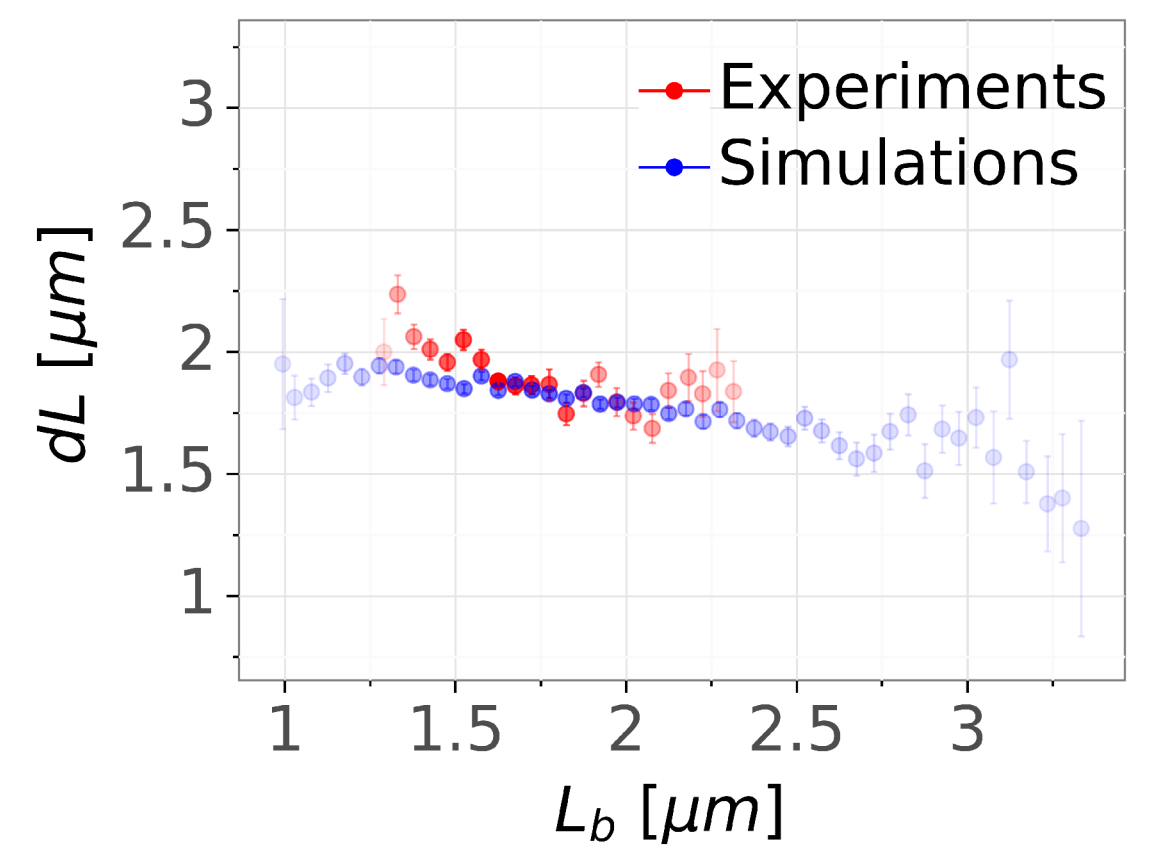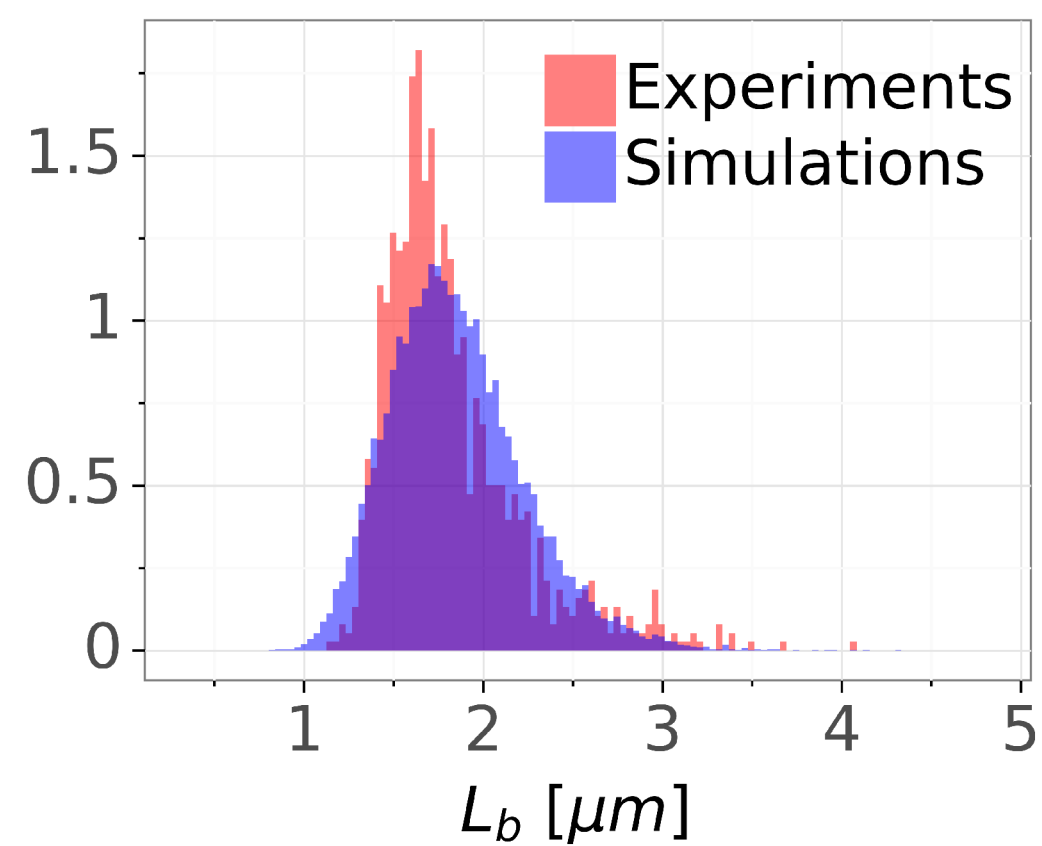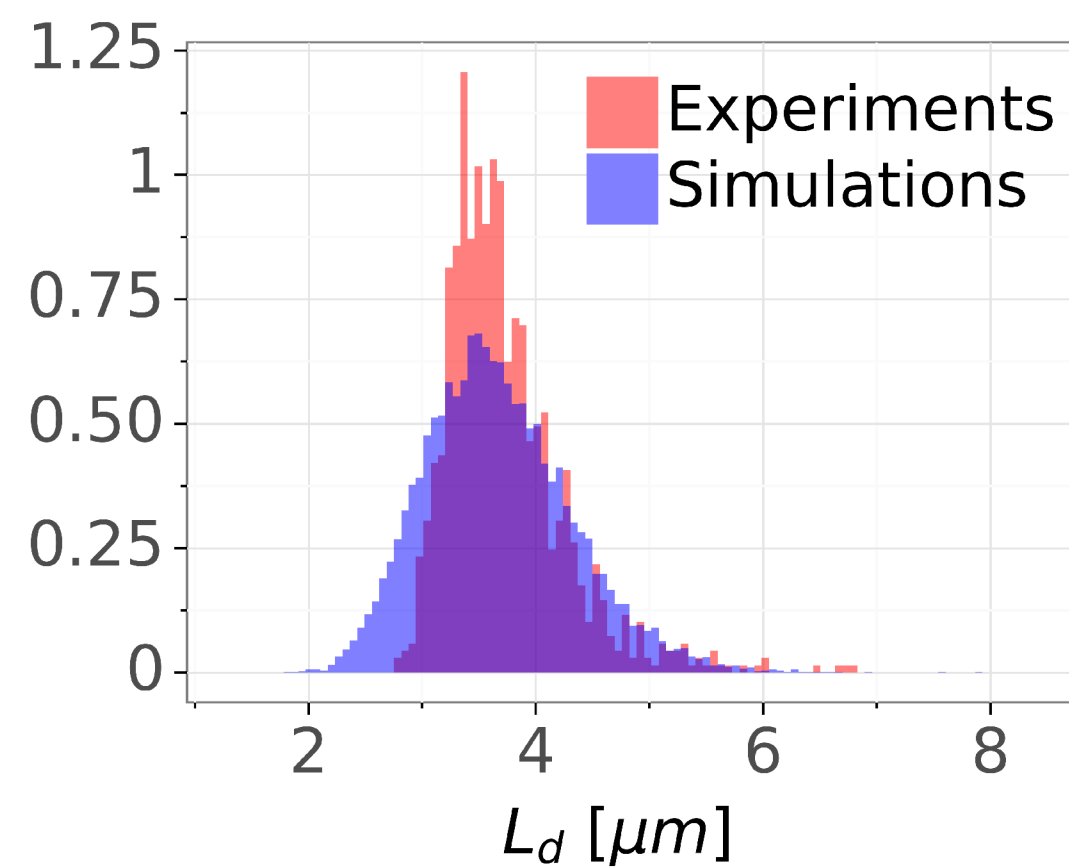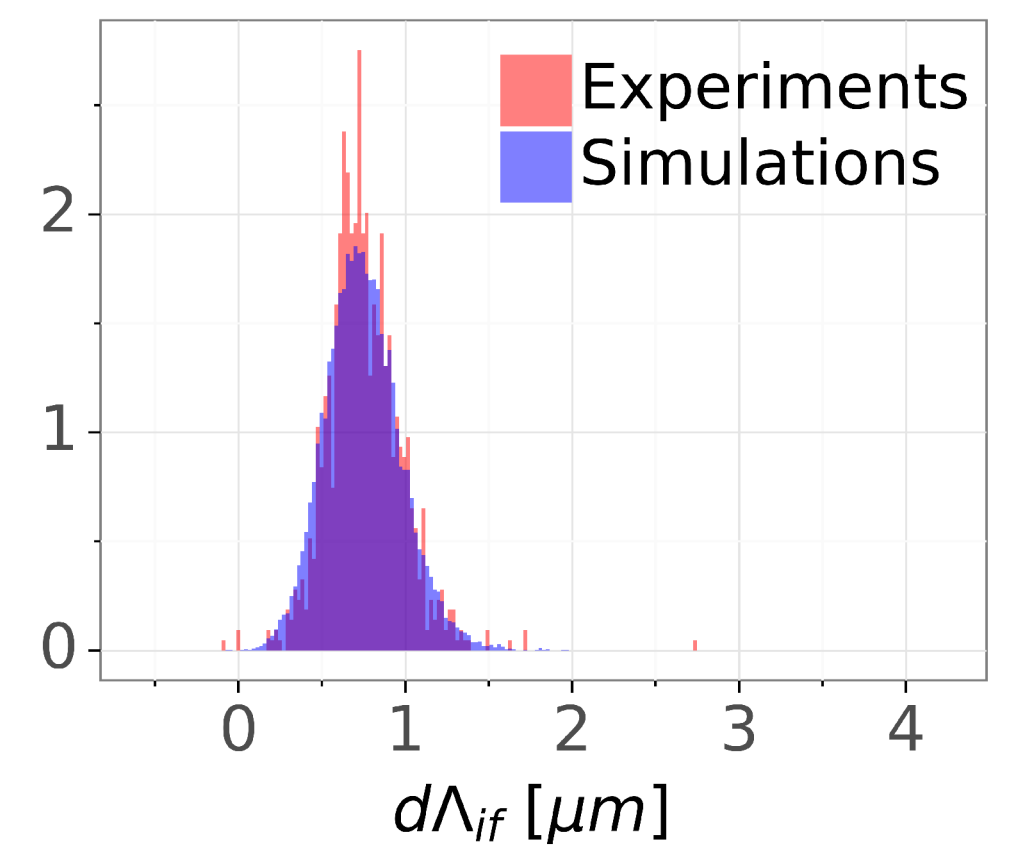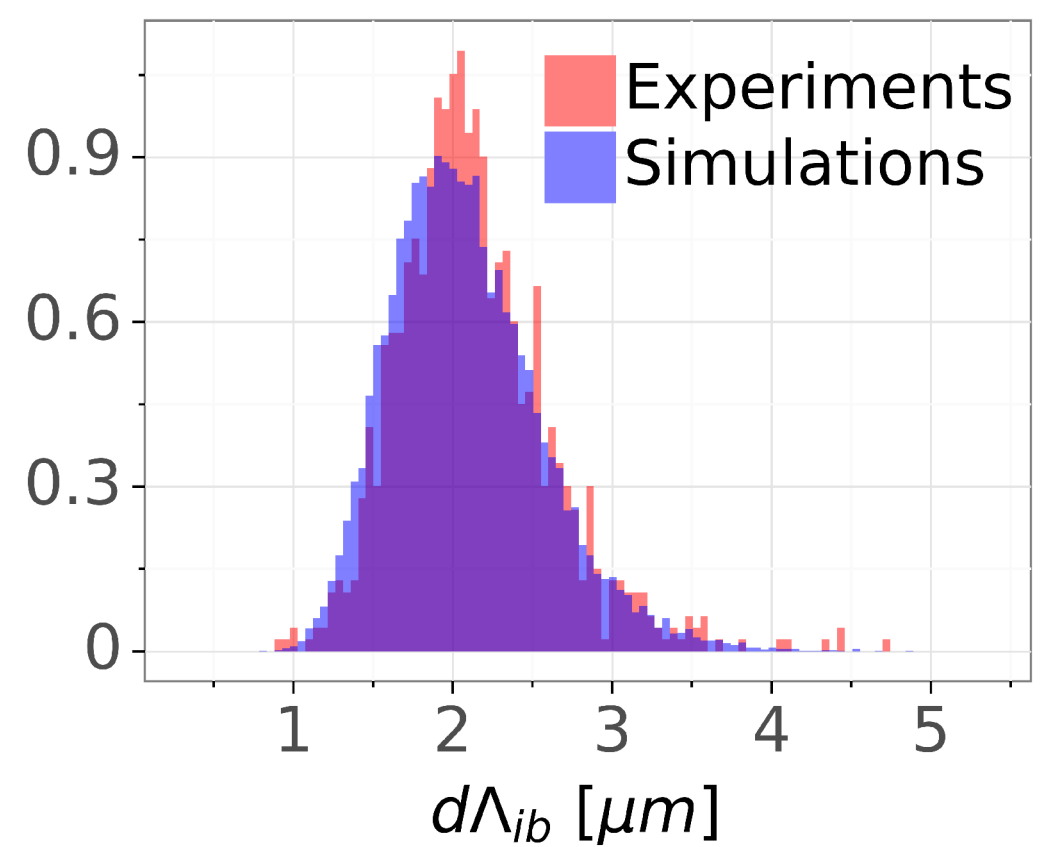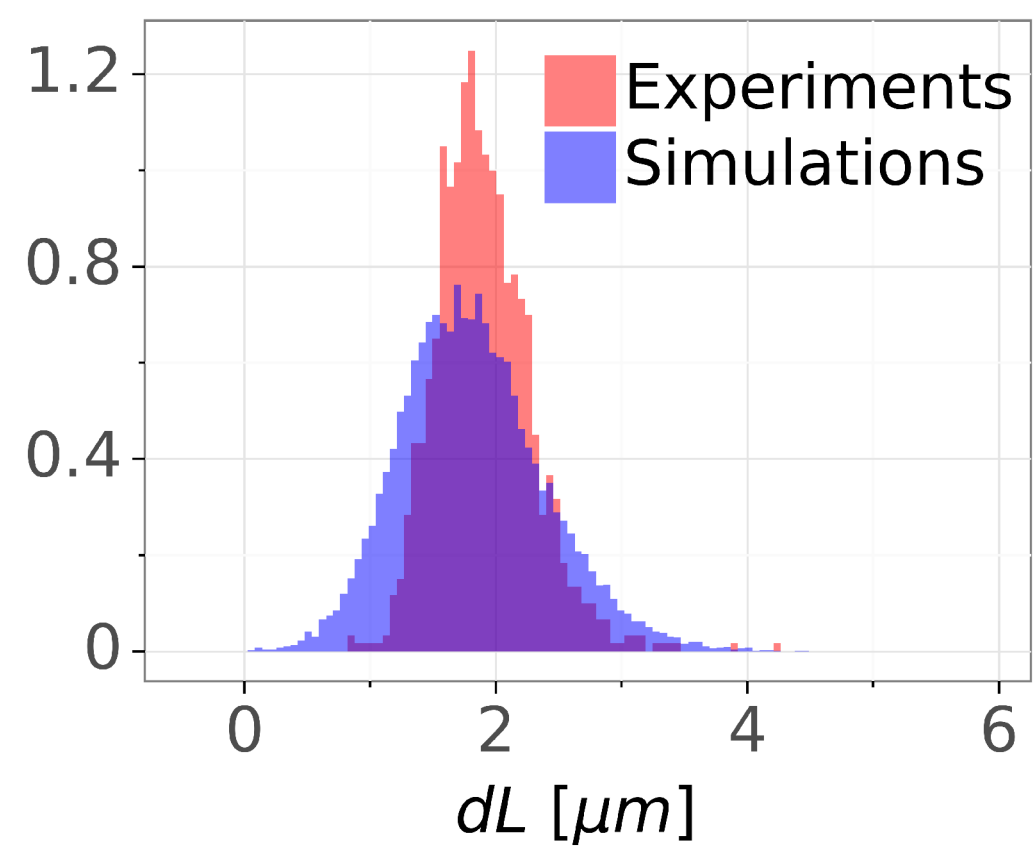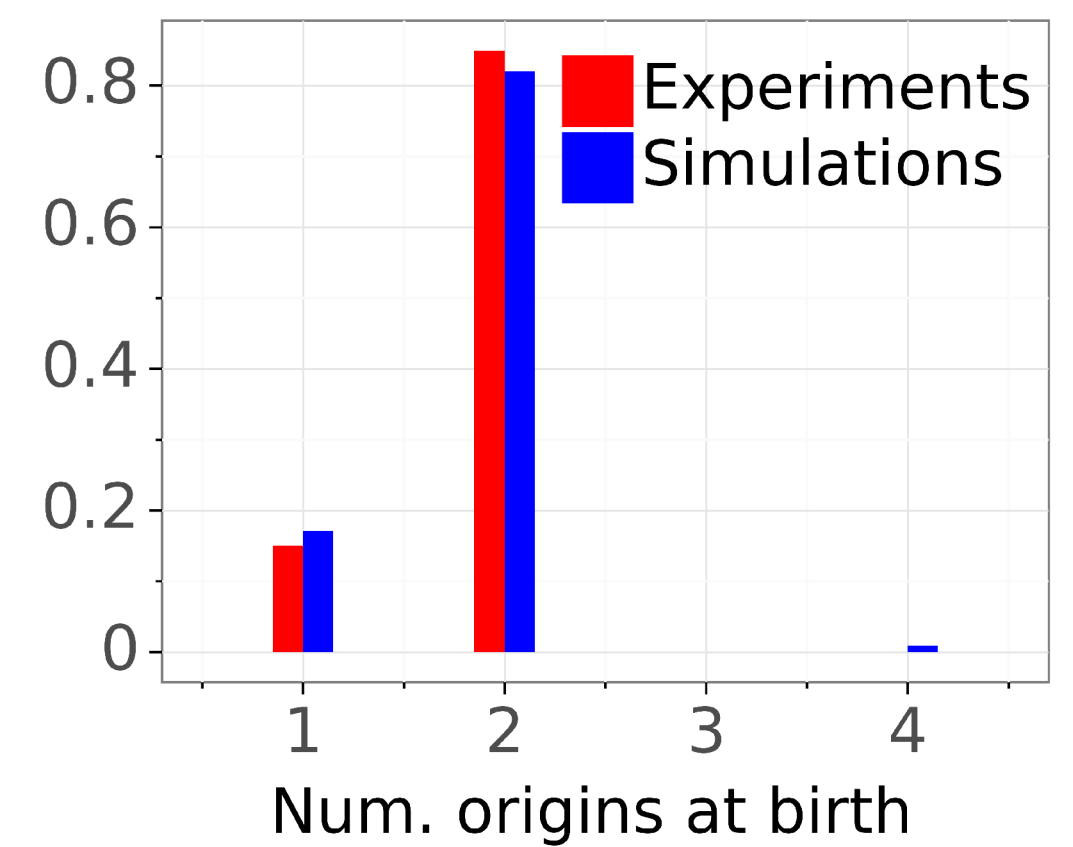

Supplement: supp [file elife-48063-supp-v1.zip › elife_poa_e48063_Figure_5_figure_supplement_3.pdf]

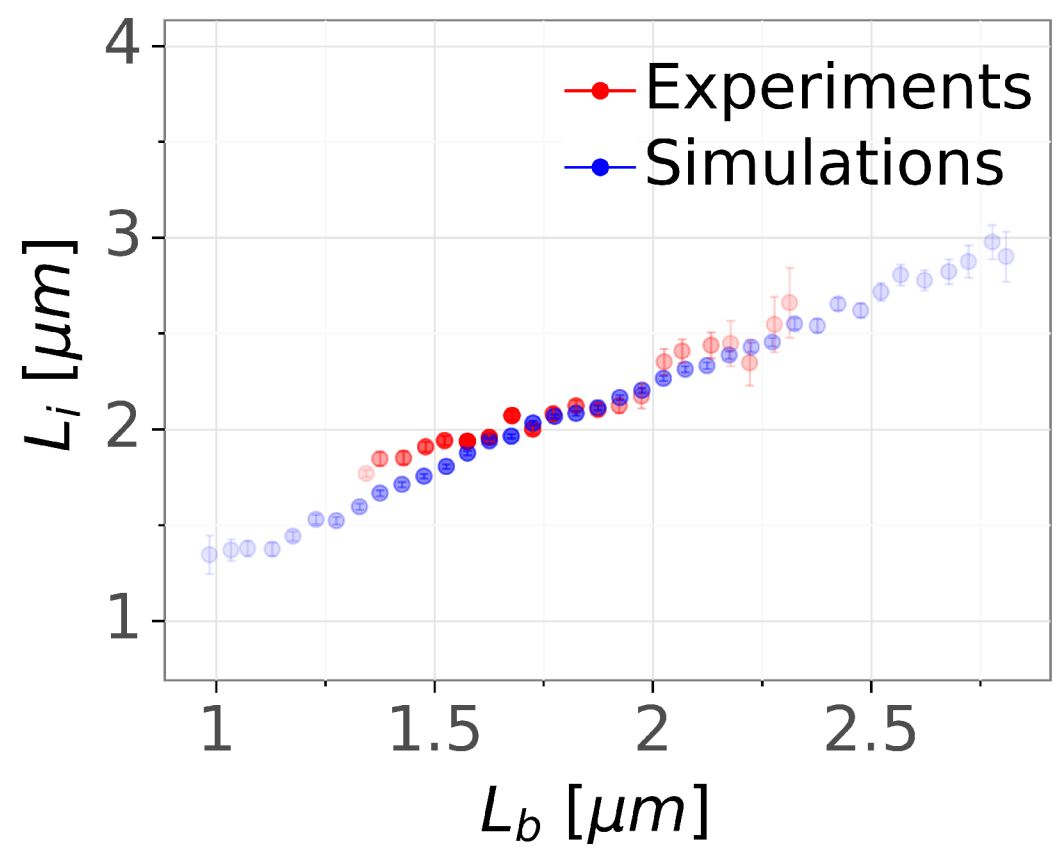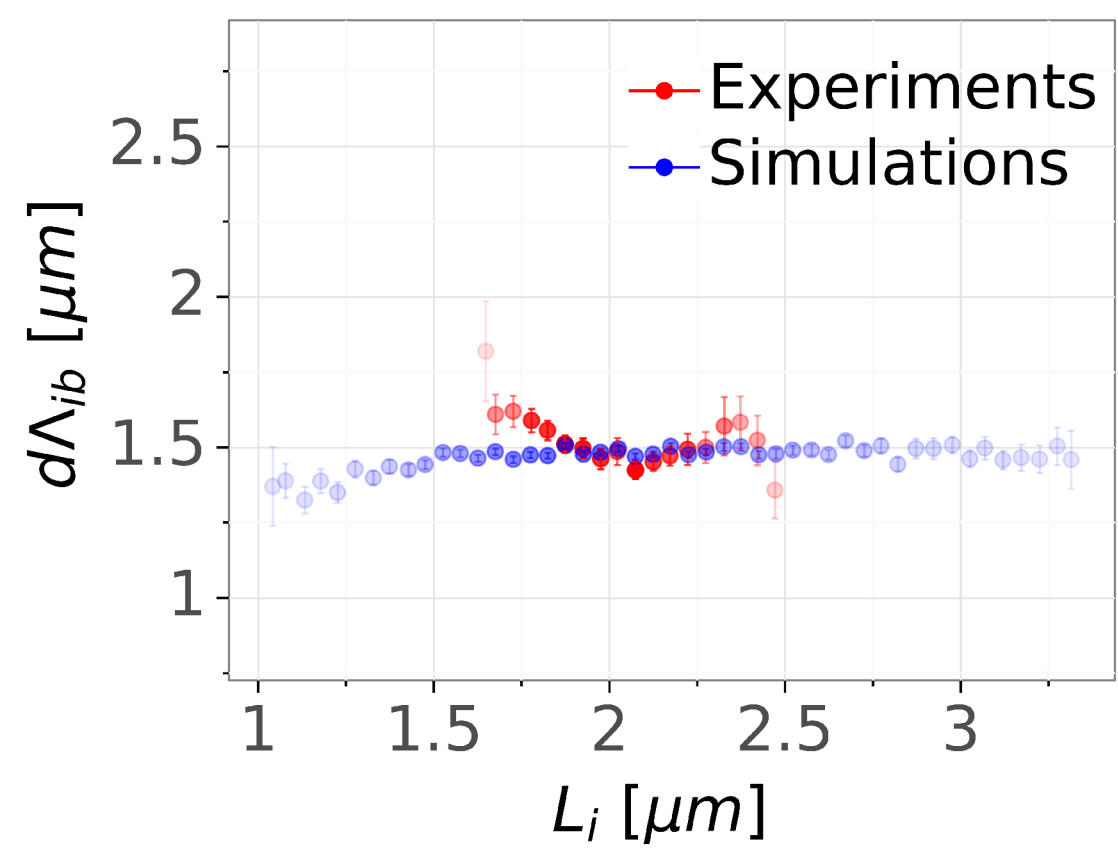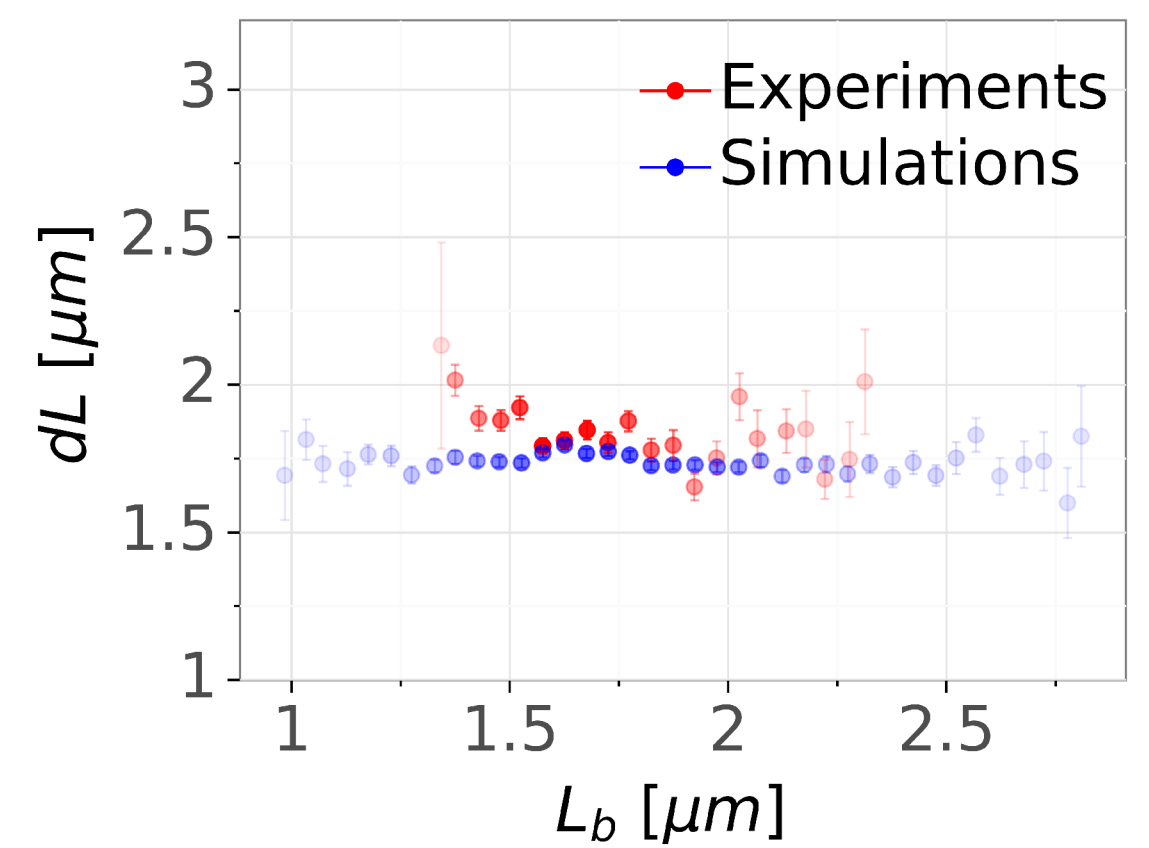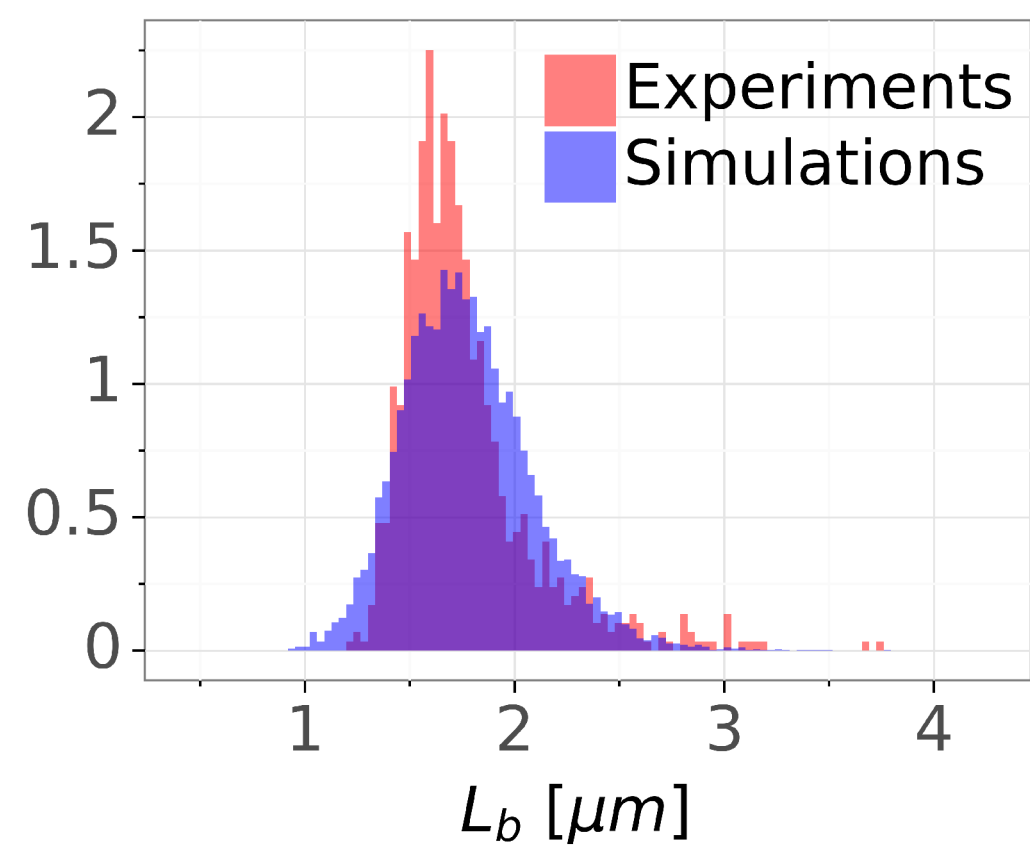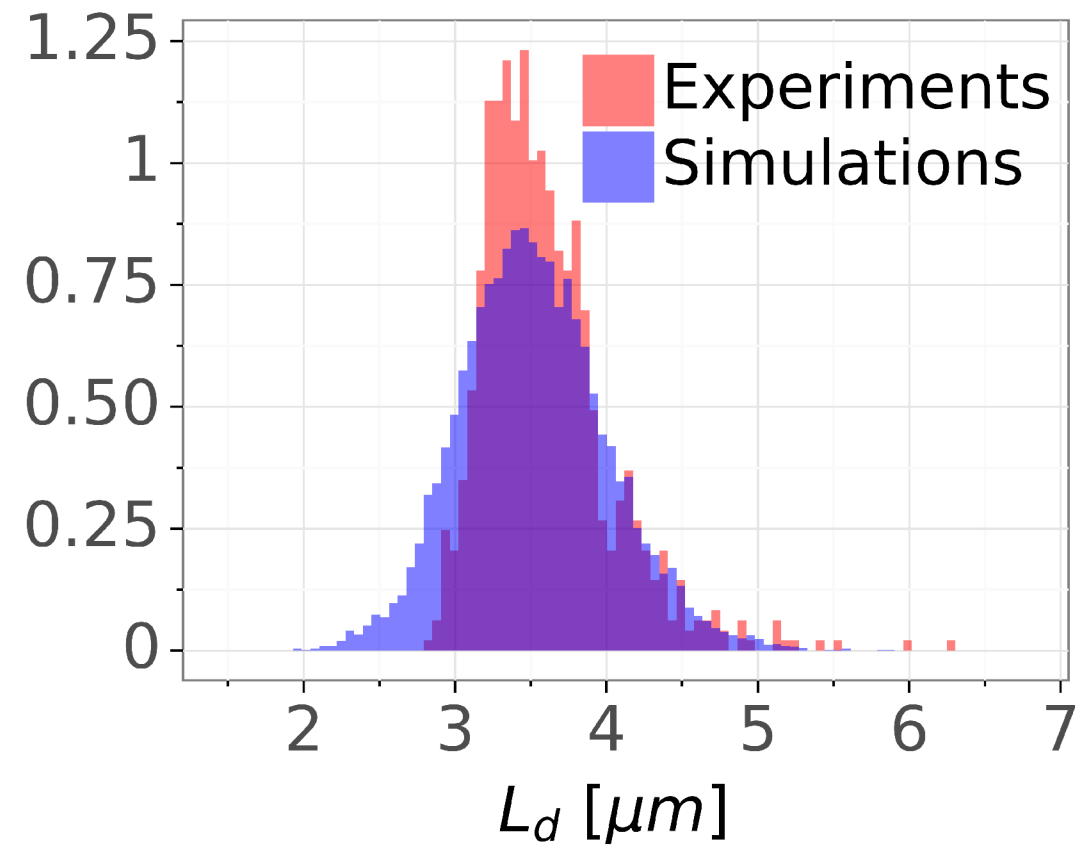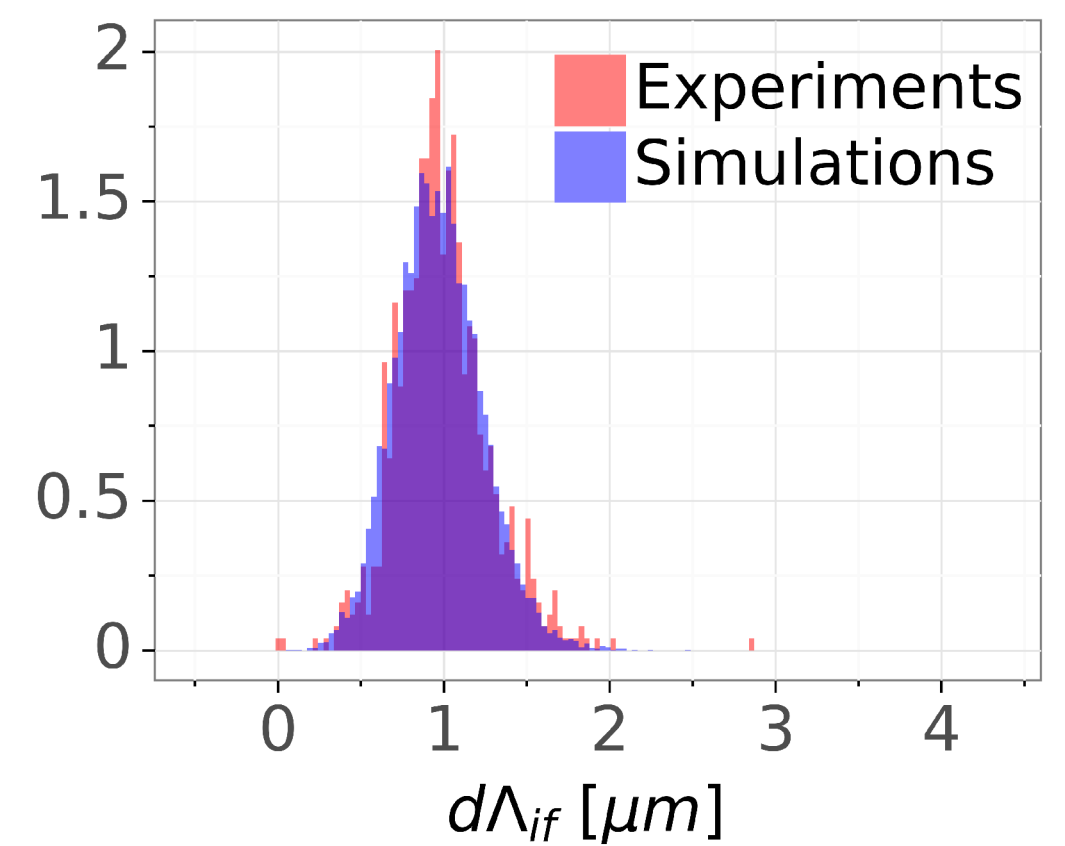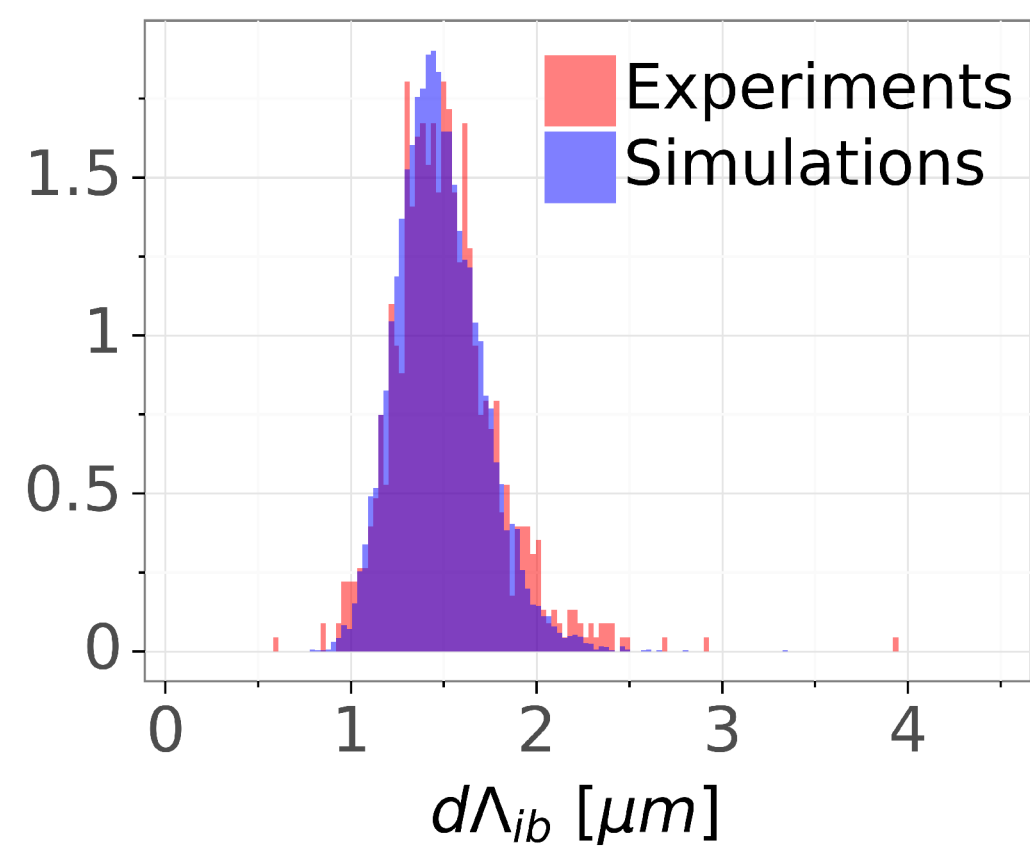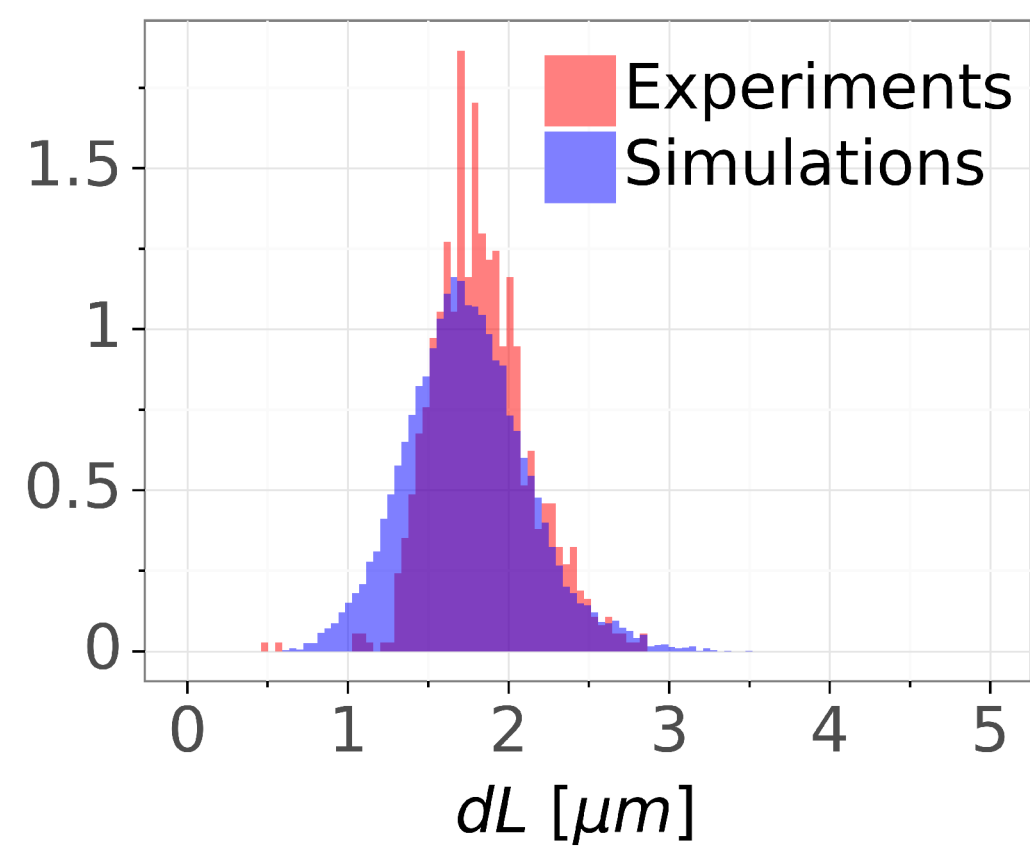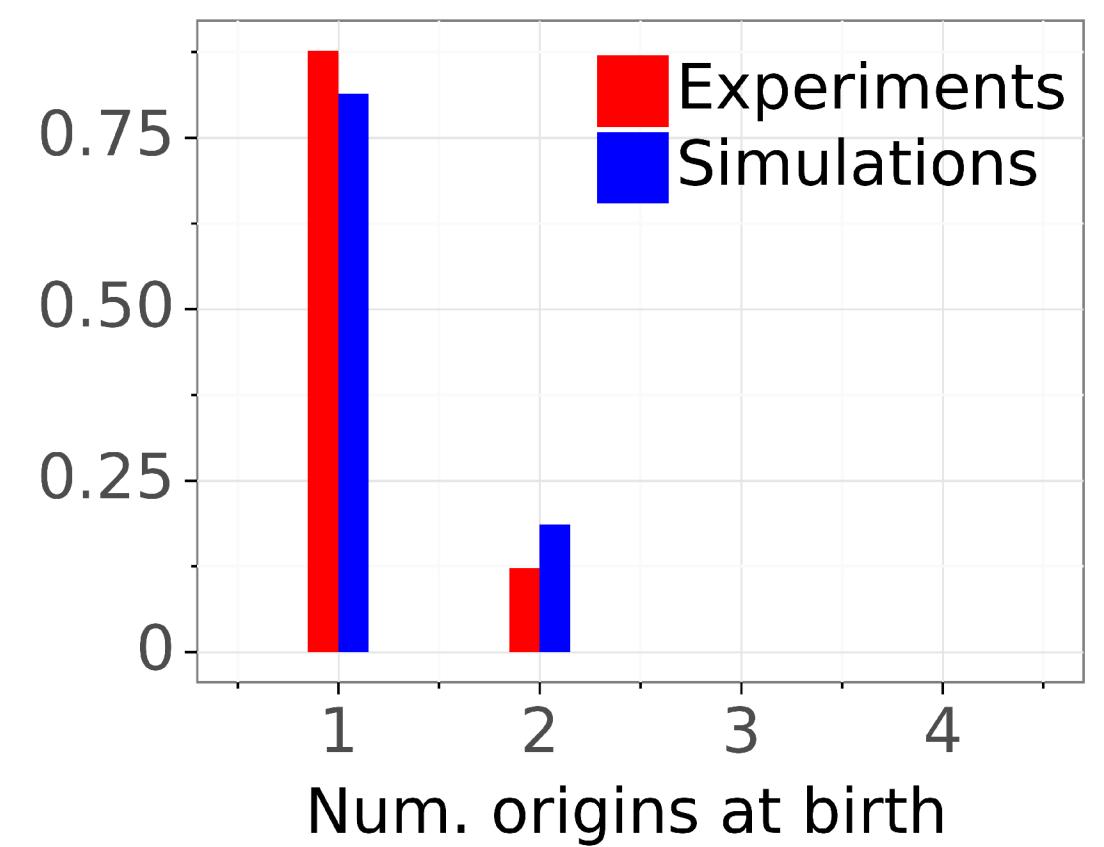

Supplement: supp [file elife-48063-supp-v1.zip › elife_poa_e48063_Figure_5_figure_supplement_2.pdf]

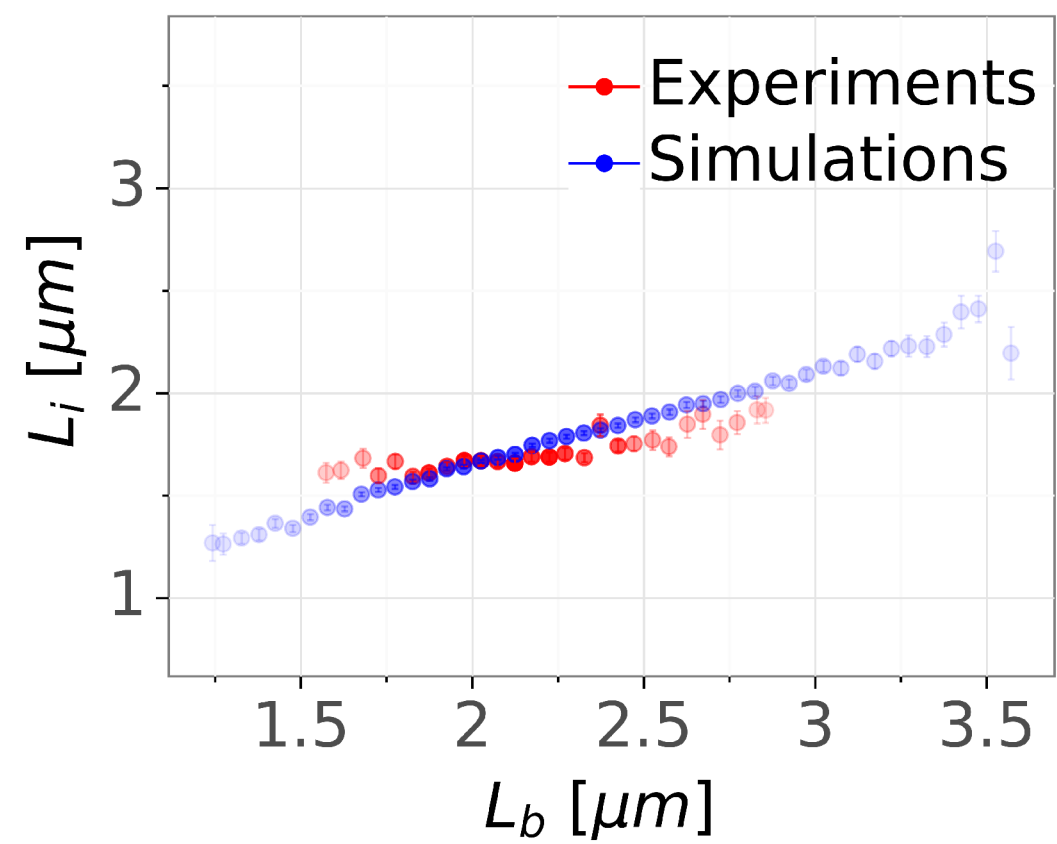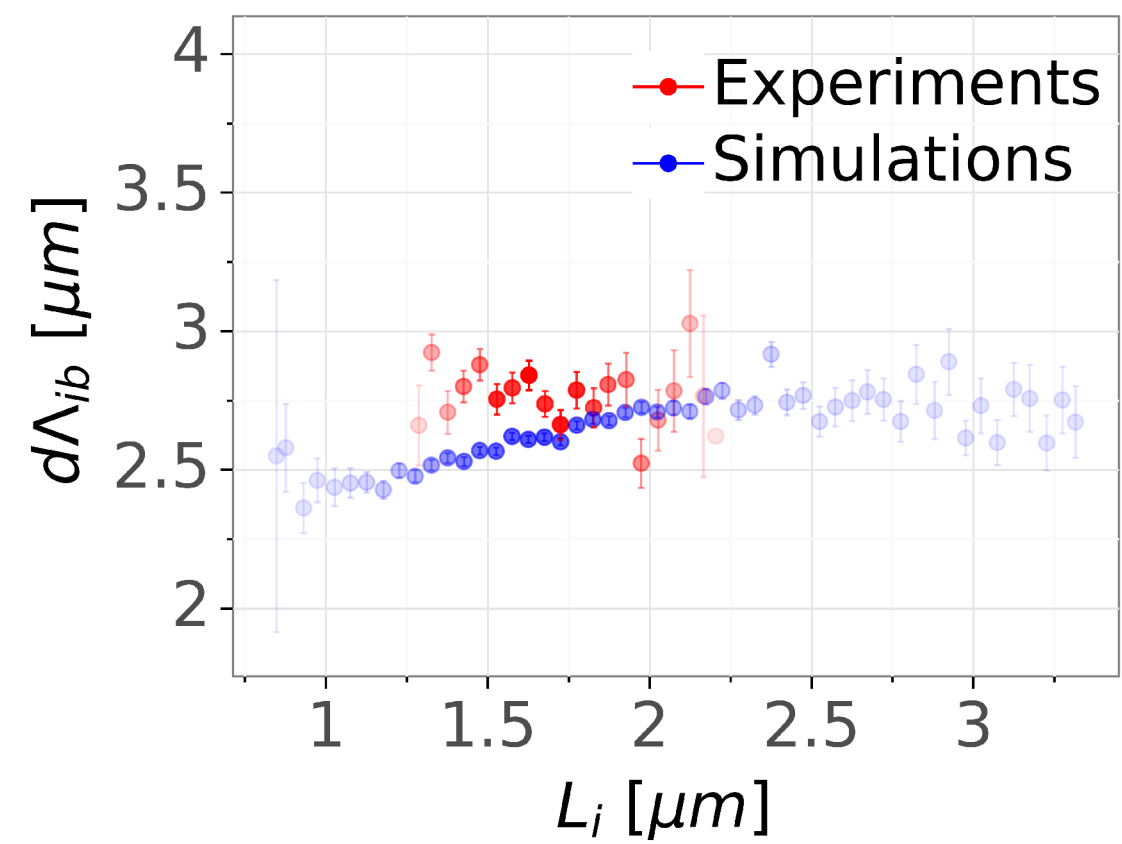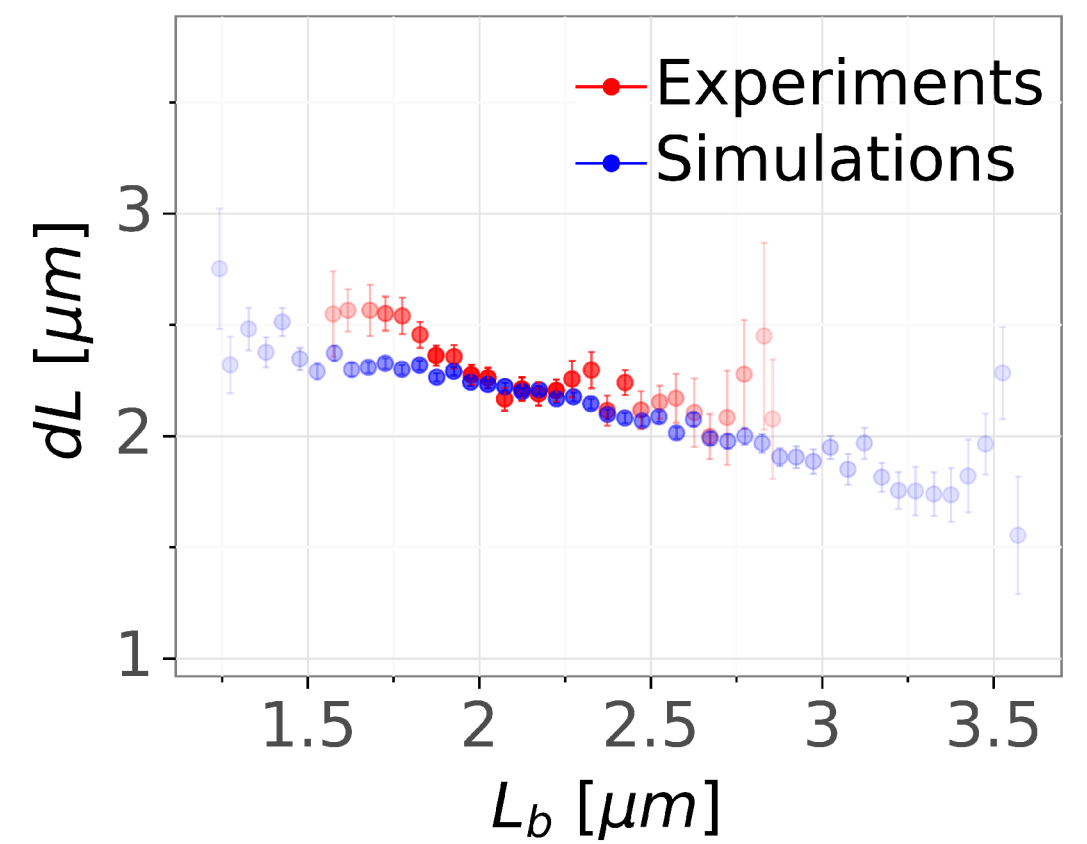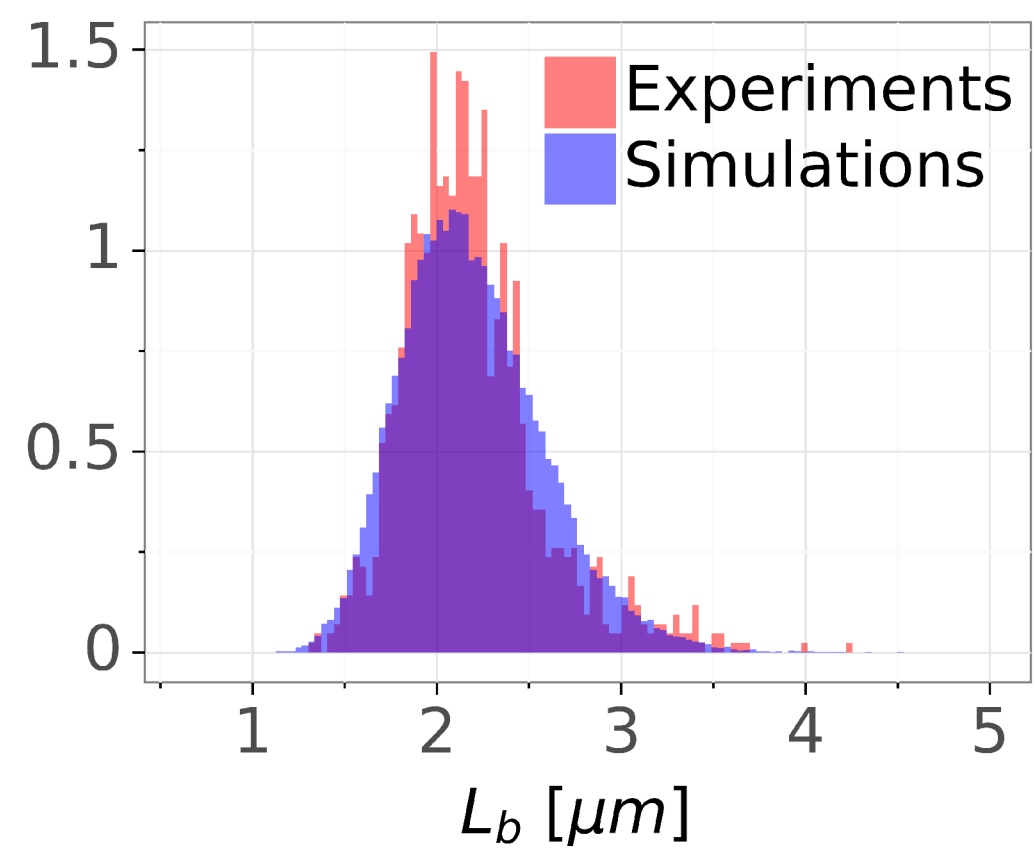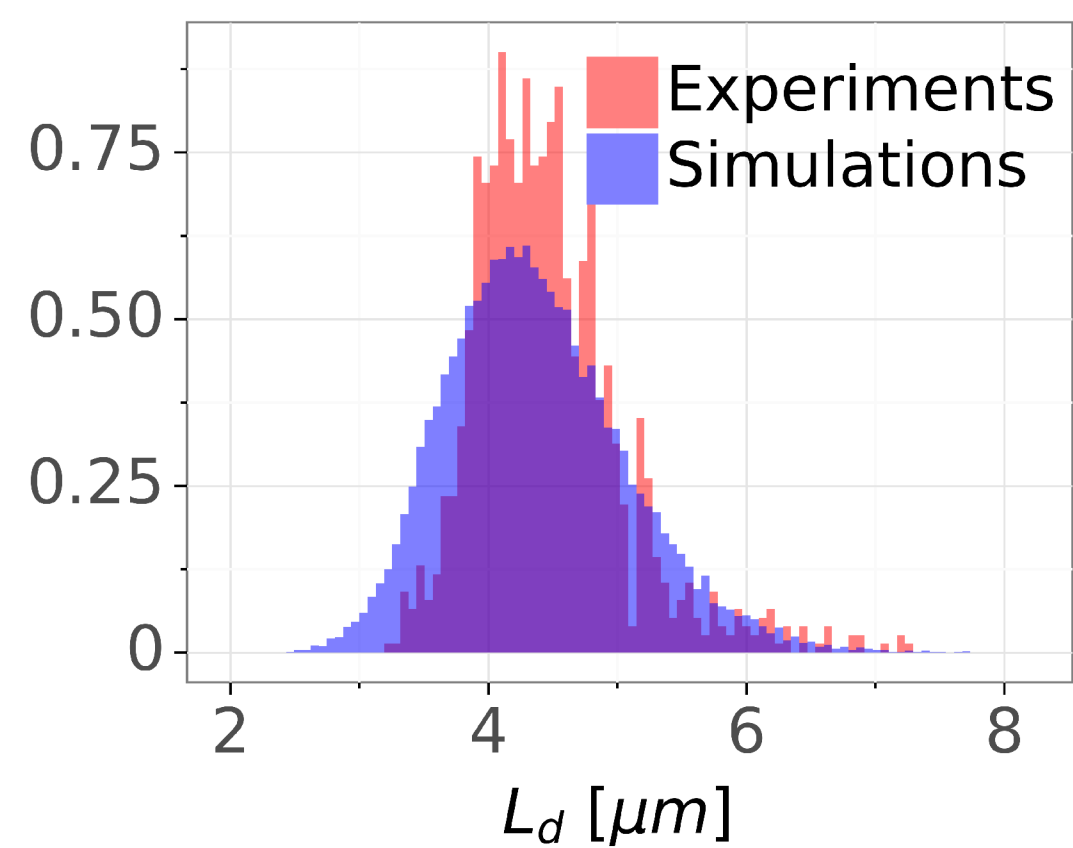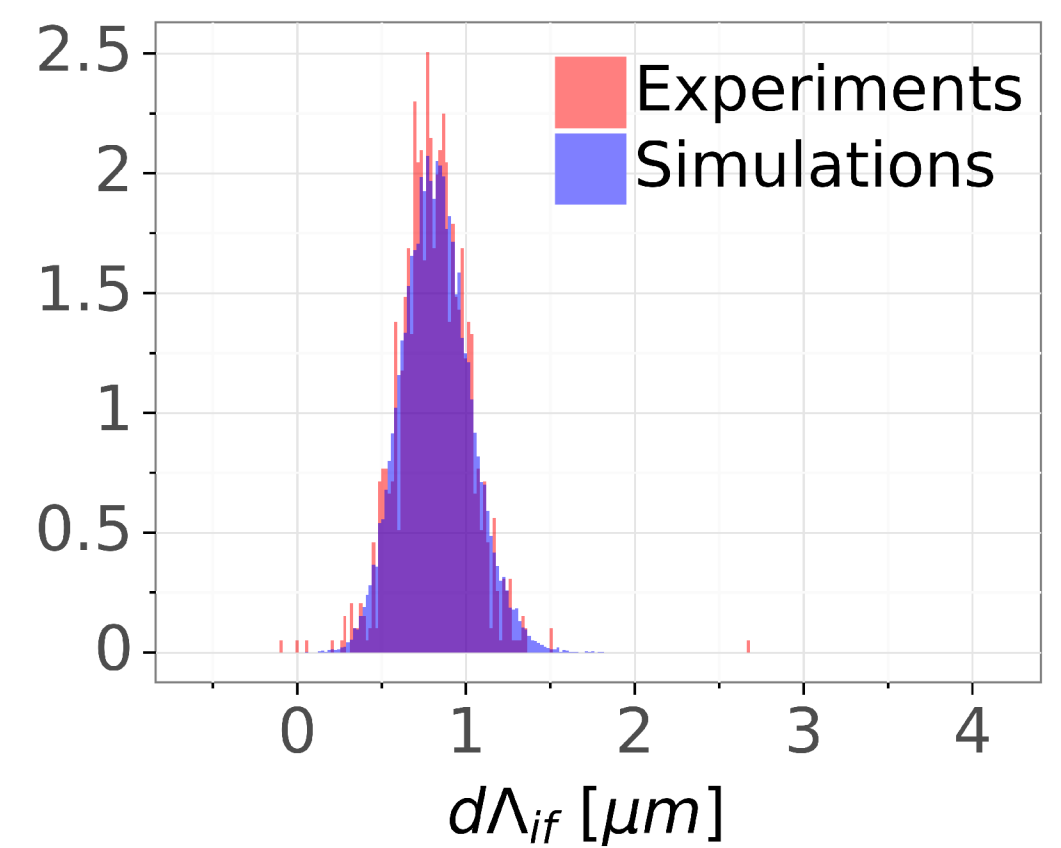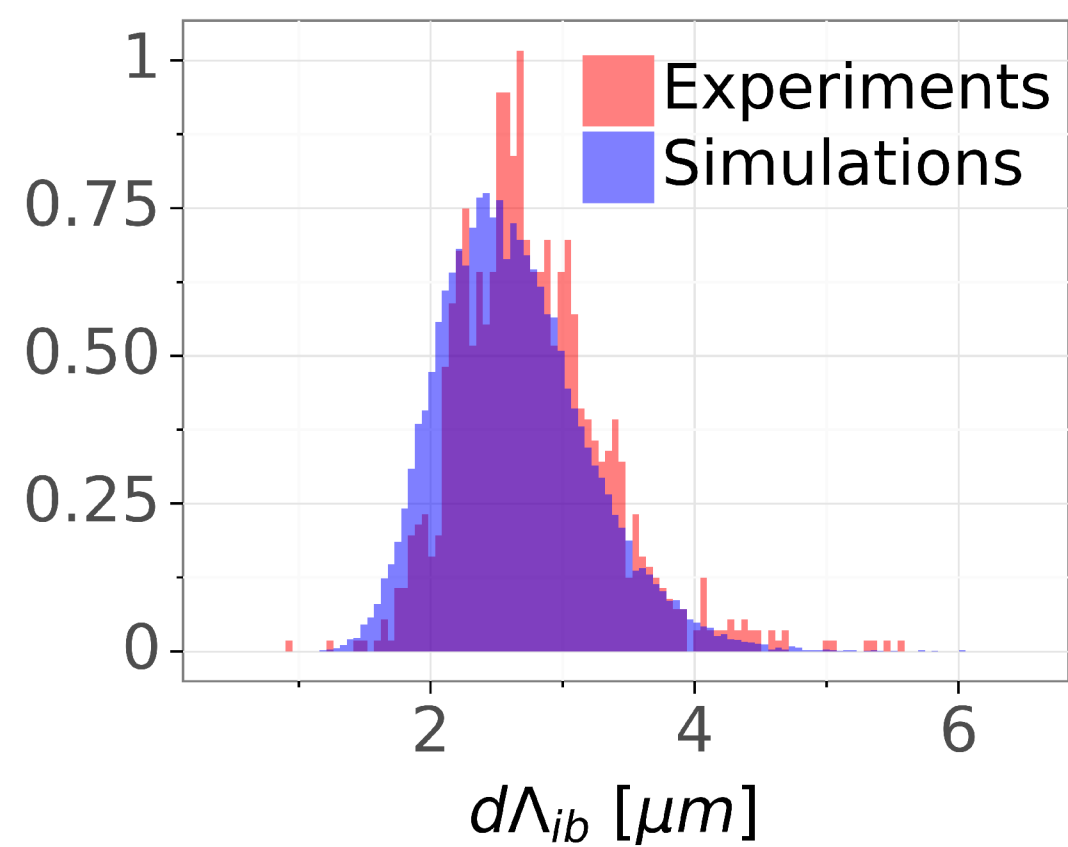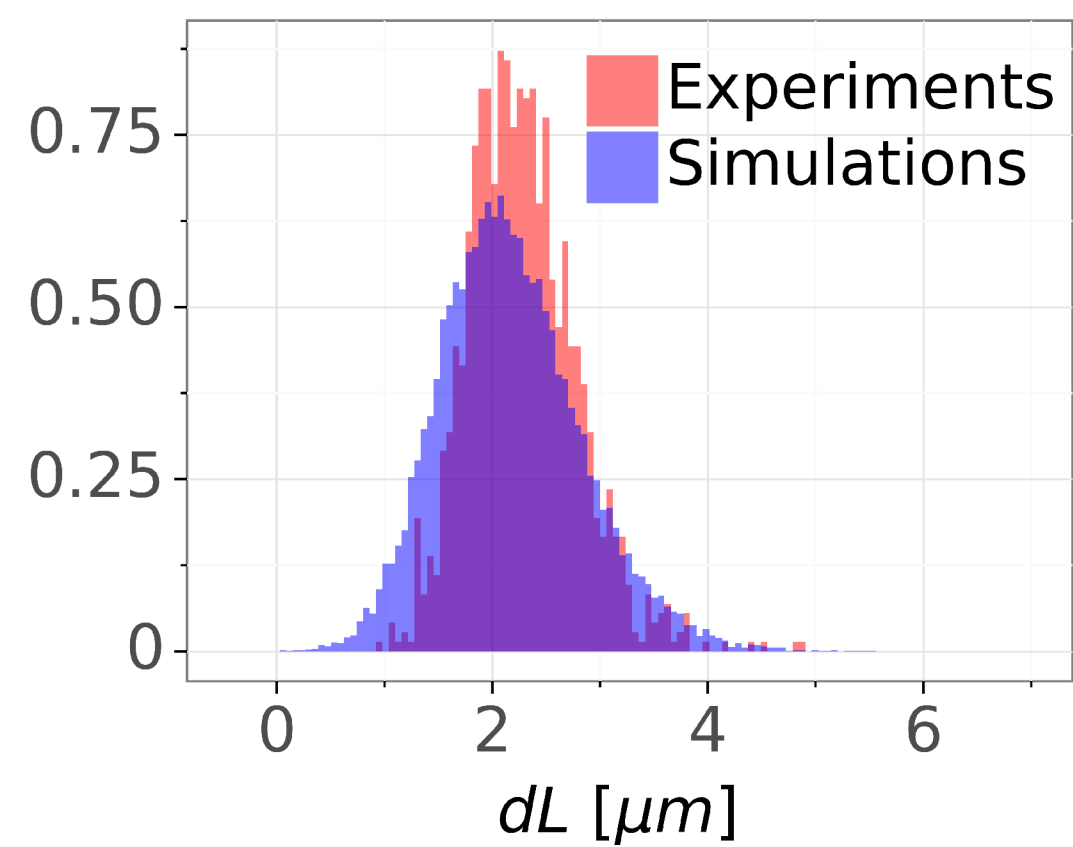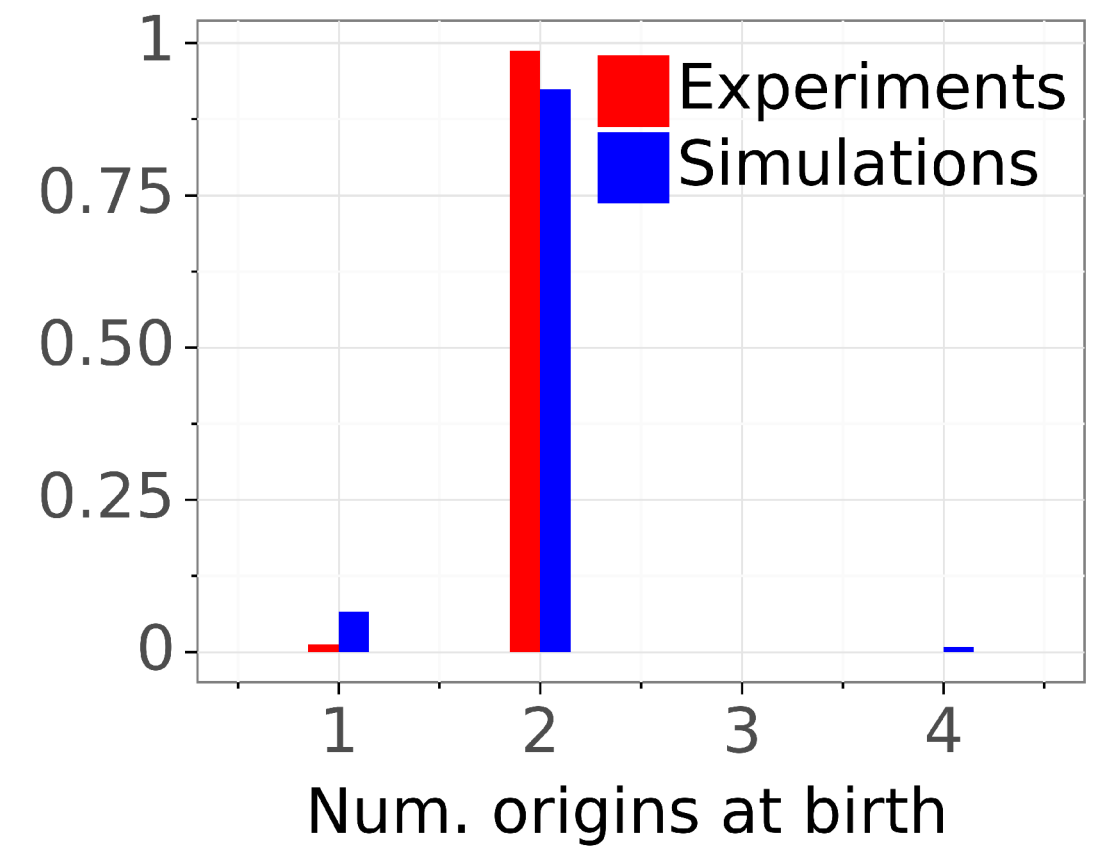

Supplement: supp [file elife-48063-supp-v1.zip › elife_poa_e48063_Figure_5_figure_supplement_4.pdf]

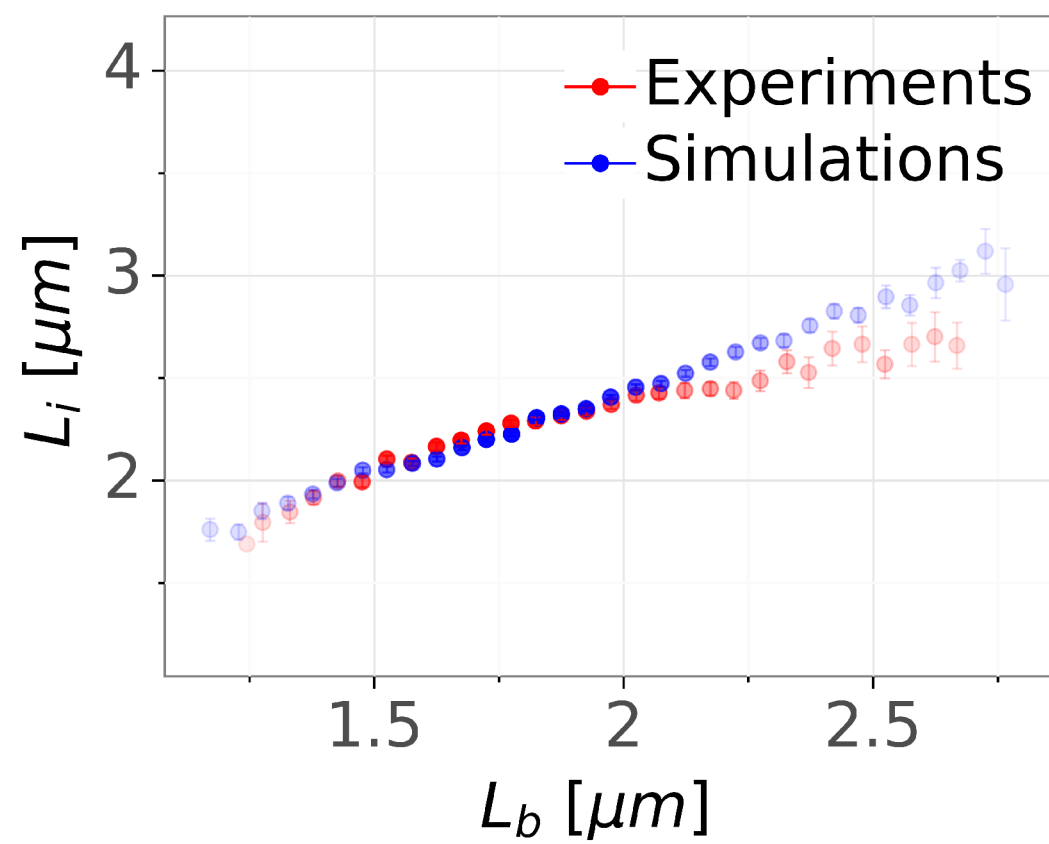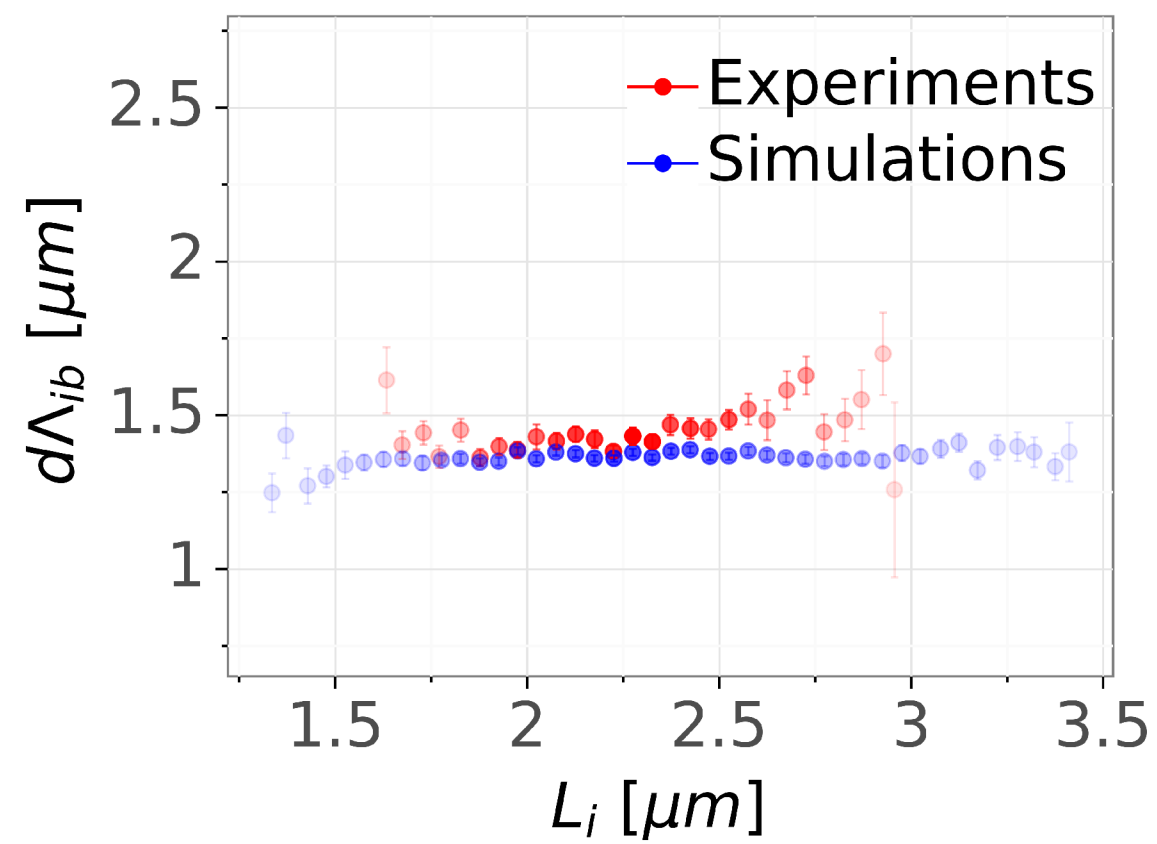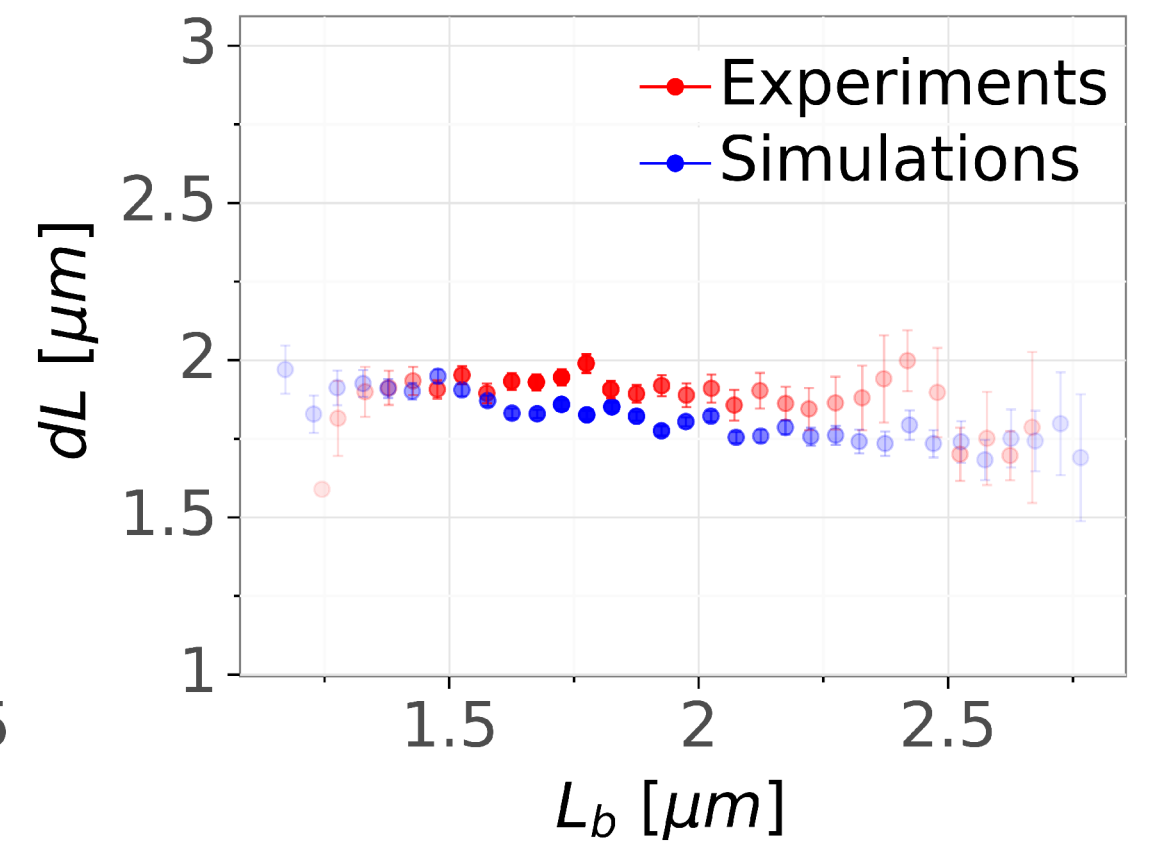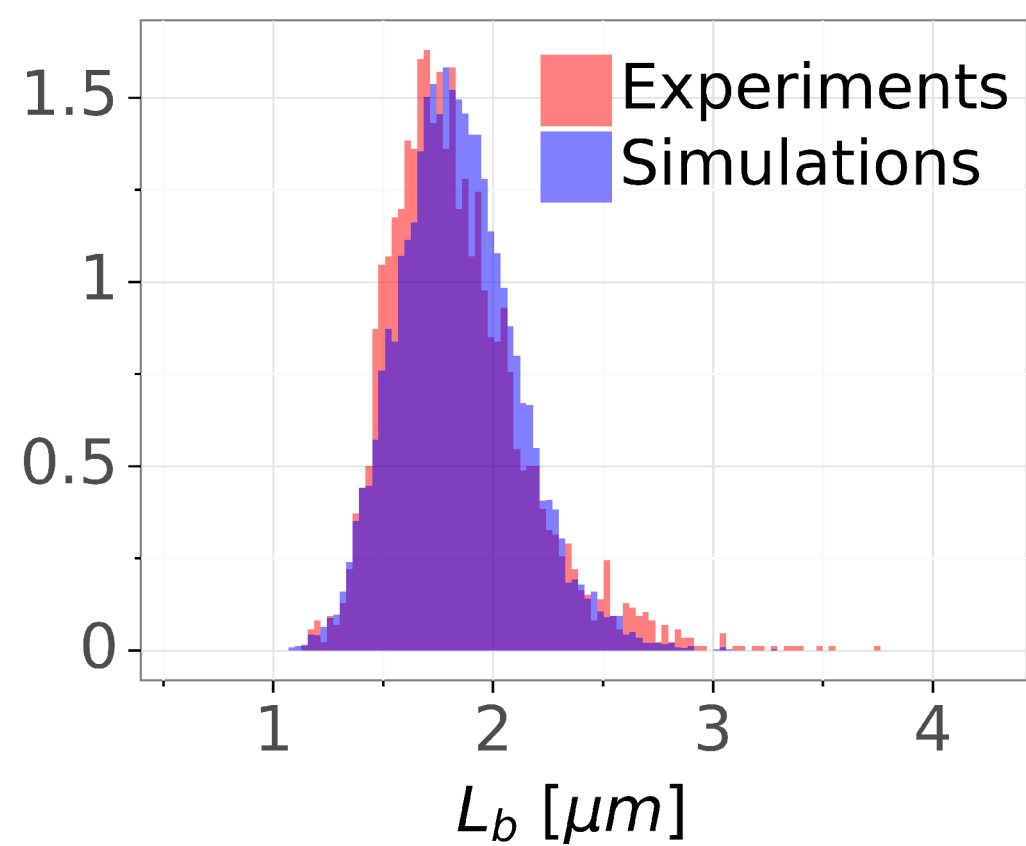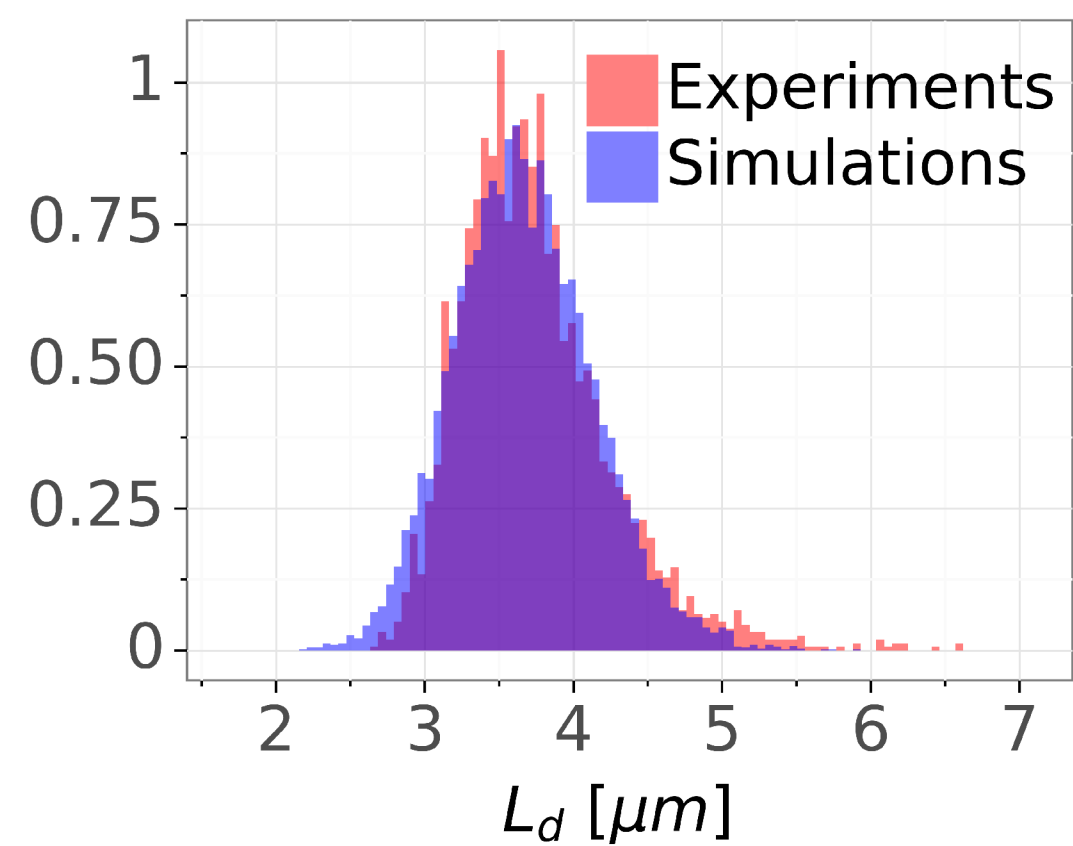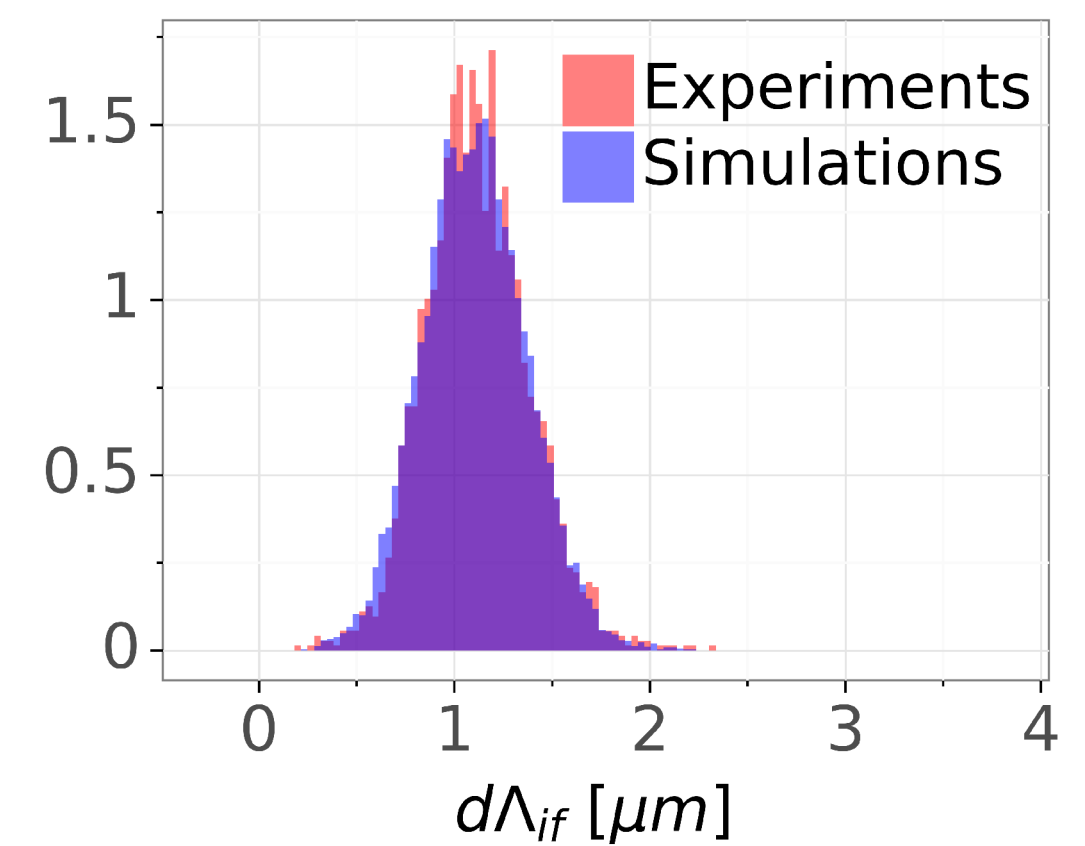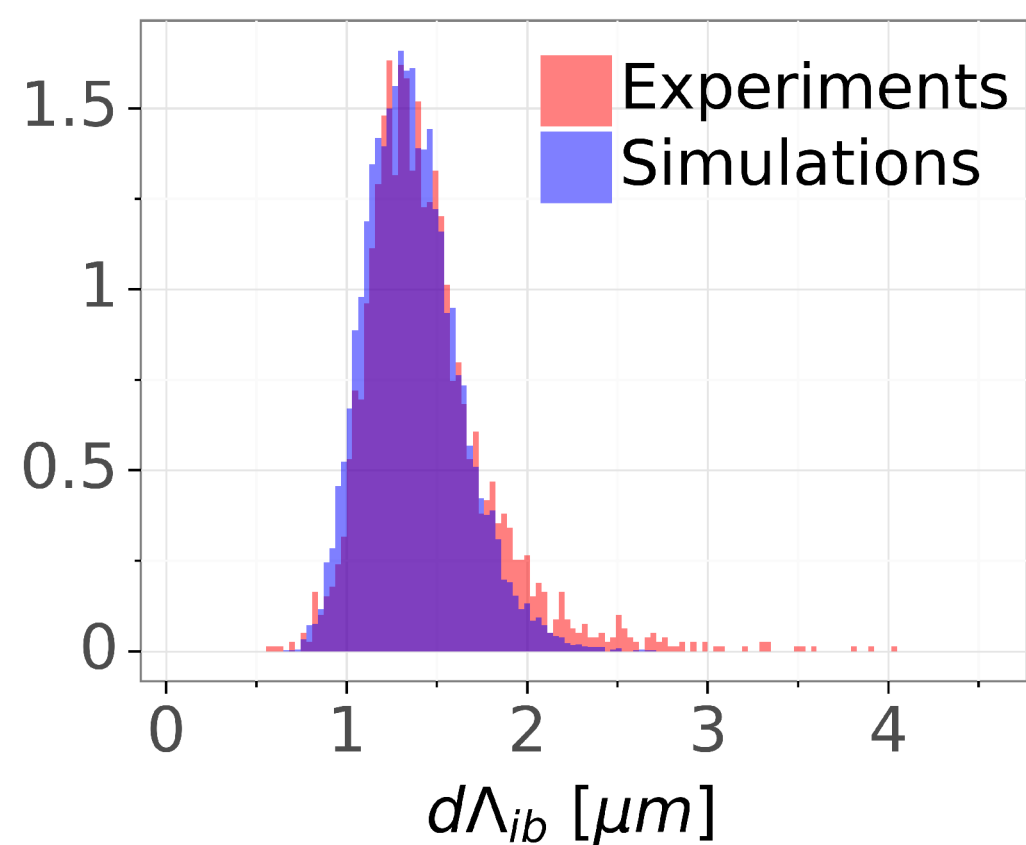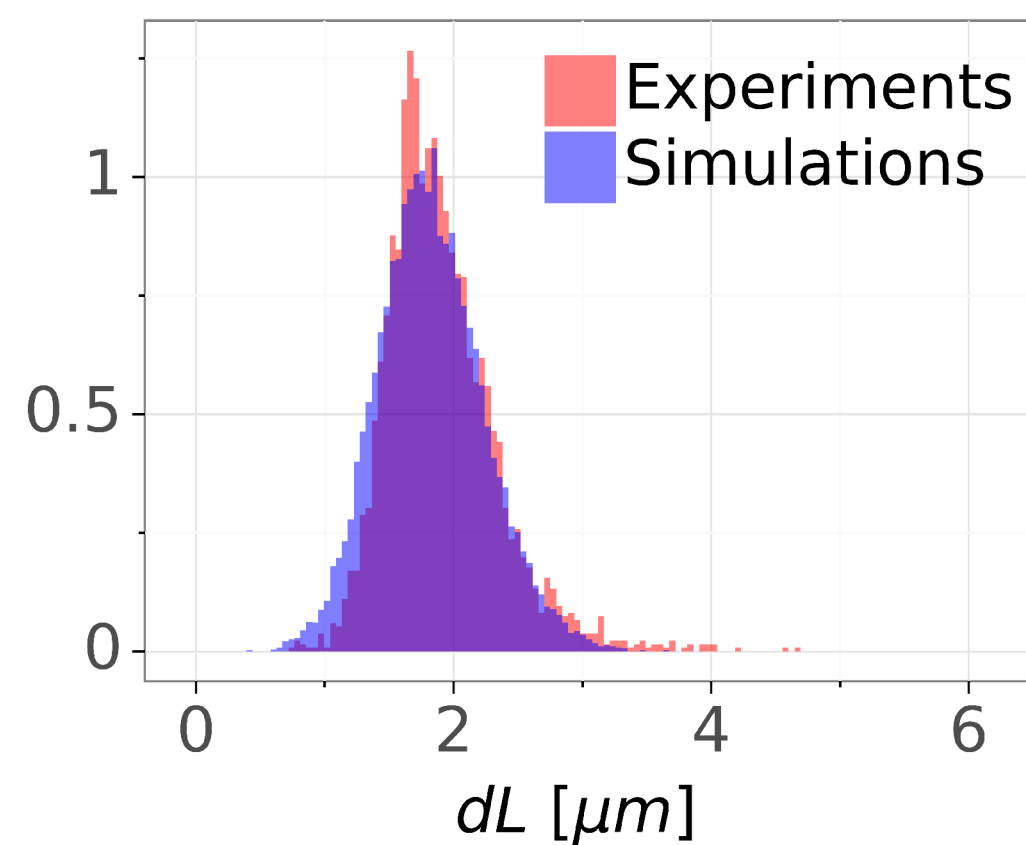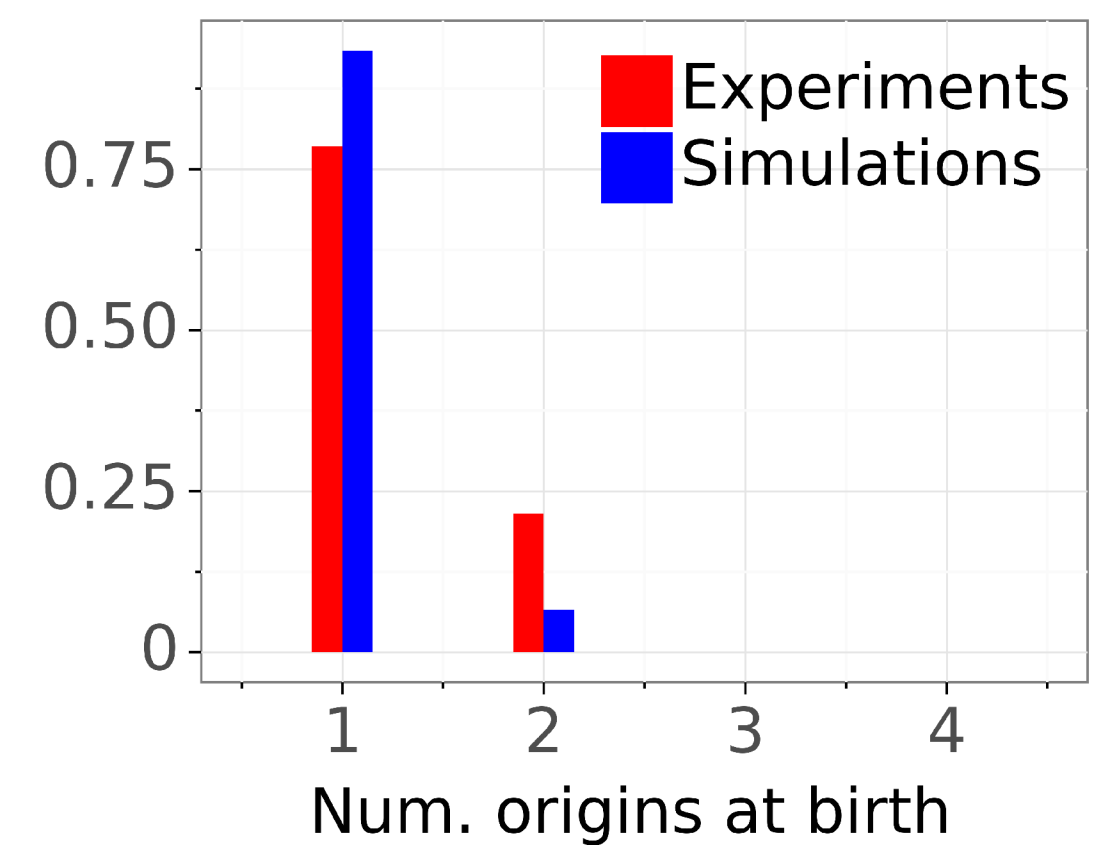

Supplement: supp [file elife-48063-supp-v1.zip › elife_poa_e48063_Figure_5_figure_supplement_1.pdf]
